# Supplementary material for: Mouse B2 SINE elements function as IFN-inducible enhancers
Source: eLife. 2023 May 9;12:e82617. doi: 10.7554/eLife.82617 (PMC10229128; doi:10.7554/eLife.82617)
Supplement: Supplementary file 1. [file elife-82617-supp1.xlsx]

## Sheet: Description
Supplemental Table S1
DESeq2 gene-level results for murine BMDMs stimulated with IFNG for 2 hours or 4 hours
Aligned reads assigned to genes using Gencode M18 annotation
Sheets
IFNG 4h vs UT (Piccolo)	DESeq2 output for murine BMDMs stimulated with IFNG for 4 hours (Piccolo et al. 2017)
IFNG 2h vs UT (Piccolo)	DESeq2 output for murine BMDMs stimulated with IFNG for 2 hours (Piccolo et al. 2017)
IFNG 2h vs UT (Platanitis)	DESeq2 output for murine BMDMs stimulated with IFNG for 2 hours (Platanitis et al. 2019)
Union ISG names	Gene names for the union of murine ISGs (FDR < 0.05, log2FC > 1, n=1896) across comarisons and datasets
Union ISG GO	Gene ontology analysis results for union murine ISGs (n=1896) using gProfiler
IFNG 24h vs UT (Qiao)	DESeq2 output for human CD14 monocytes stimulated with IFNG for 24 hours (Qiao et al. 2016)
IFNG 24h vs UT (McCann)	DESeq2 output for human CD14 monocytes stimulated with IFNG for 24 hours (McCann et al. 2022)
RNA-seq data sources
Dataset	Accession
IFNG 4h vs UT (Piccolo)	GSE84517
IFNG 2h vs UT (Piccolo)	GSE84517
IFNG 2h vs UT (Platanitis)	GSE115434
IFNG 24h vs UT (Qiao)	GSE84691
IFNG 24h vs UT (McCann)	GSE176562

## Sheet: IFNG 4h vs UT (Piccolo)
Gene ID	Gene name	baseMean	log2FoldChange	lfcSE	stat	pvalue	padj	BMDM_UT_R1	BMDM_UT_R2	BMDM_UT_R3	BMDM_IFNG_2h_R1	BMDM_IFNG_2h_R2	BMDM_IFNG_2h_R3	BMDM_IFNG_4h_R1	BMDM_IFNG_4h_R2	BMDM_IFNG_4h_R3
ENSMUSG00000079363.7	Gbp4	9107.71	9.57588	0.361476	26.491	1.22947e-154	2.3569e-150	51.1386	31.9306	17.3738	1829.42	1950.95	2349.25	30364.2	17899.2	27475.9
ENSMUSG00000023959.8	Clic5	1026.61	7.12716	0.300556	23.7132	2.63407e-124	2.52476e-120	22.0598	18.2461	22.9335	33.5845	25.6127	44.8219	3282.56	2413.31	3376.35
ENSMUSG00000009585.18	Apobec3	8823.64	2.33651	0.10029	23.2974	4.70873e-120	3.00888e-116	2565.96	2383.39	2451.1	11644.5	11218.4	11743.3	12499.6	11900.6	13005.9
ENSMUSG00000045092.8	S1pr1	1625.86	-5.59031	0.247215	-22.6132	3.21654e-113	1.54153e-109	4599.47	3560.26	5185.05	367.563	326.379	317.651	104.586	109.234	62.5637
ENSMUSG00000041481.16	Serpina3g	31064.7	9.3717	0.420808	22.2707	7.10858e-110	2.72543e-106	160.435	139.126	49.3417	21595.7	12512.2	16138.8	102915	51025.1	75046.2
ENSMUSG00000043415.5	Otud1	1096.76	2.94342	0.132341	22.2411	1.37406e-109	4.39012e-106	325.883	305.622	330.103	448.726	495.422	534.94	2485.22	2463.27	2481.69
ENSMUSG00000034842.16	Art3	9125.4	8.87036	0.40724	21.7817	3.46128e-105	9.47897e-102	57.1549	45.6152	26.4082	6328.8	8442.67	7495	28103.7	9768.42	21860.8
ENSMUSG00000038037.5	Socs1	2933.21	7.07008	0.326065	21.683	2.96695e-104	7.10955e-101	56.1522	31.9306	18.7638	4476.06	3882.88	3687.09	5300.77	4187.31	4757.97
ENSMUSG00000054072.11	Iigp1	68346.3	8.81617	0.417243	21.1296	4.24997e-99	9.05245e-96	570.547	289.656	187.638	51579.2	35005.9	54925.4	209521	93806	169232
ENSMUSG00000034855.13	Cxcl10	145369	8.41552	0.401129	20.9796	1.00767e-97	1.7561e-94	1382.75	868.969	510.096	134357	108526	119854	425142	163906	353773
ENSMUSG00000104713.4	Gbp6	6145.1	8.20324	0.390987	20.9809	9.80744e-98	1.7561e-94	80.2174	59.2997	26.4082	2539.36	1971.44	2378.48	21618.3	10336.6	16295.8
ENSMUSG00000066363.12	Serpina3f	10309.1	9.39511	0.472548	19.8818	5.84876e-88	9.34339e-85	54.1468	36.4921	16.6789	9222.67	4967.4	7030.22	35985	12368	23101.6
ENSMUSG00000025887.10	Casp12	768.98	5.50495	0.281214	19.5757	2.49229e-85	3.67517e-82	39.106	25.0883	19.4587	1112.95	997.431	949.055	1500.45	1090.65	1186.62
ENSMUSG00000070730.11	Rmdn3	5486.87	3.67932	0.189249	19.4417	3.42591e-84	4.69105e-81	843.286	695.631	837.419	5543.3	4777.86	6158.14	11668.1	8393.25	10464.8
ENSMUSG00000023206.16	Il15ra	1057.77	3.22603	0.169293	19.0559	5.86514e-81	7.49565e-78	158.429	187.022	221.69	1180.12	1225.02	1212.14	1679.6	1914.56	1741.36
ENSMUSG00000053931.11	Cnn3	1165.9	7.34654	0.388146	18.9273	6.7982e-80	8.1451e-77	30.0815	15.9653	11.1193	337.71	488.104	318.625	4160.67	2453.11	2677.73
ENSMUSG00000079362.5	RP23-329M7.3	3811.51	8.00753	0.426579	18.7715	1.29225e-78	1.4572e-75	55.1495	50.1767	15.289	1614.85	1084.51	1347.58	13508.2	6662.44	9965.35
ENSMUSG00000029417.9	Cxcl9	83730.7	11.1437	0.600108	18.5695	5.66842e-77	6.03687e-74	158.429	84.388	51.4266	38039.1	13951.6	35360.6	368652	59407.3	237871
ENSMUSG00000033294.11	Noc4l	2593.39	3.13446	0.169122	18.5337	1.10331e-76	1.11318e-73	472.28	542.82	436.431	3485.32	2881.06	2848.14	4738.49	4051.83	3884.16
ENSMUSG00000025165.12	Sectm1a	1075.11	9.37291	0.516811	18.136	1.65523e-73	1.58654e-70	6.01631	6.84227	0.694954	625.044	1004.02	868.181	2437.59	2181.3	2546.34
ENSMUSG00000040253.15	Gbp7	21773.8	4.89295	0.270232	18.1065	2.83368e-73	2.58674e-70	1619.39	1277.22	1101.5	26497.2	20159.4	26519	50911.8	26855.5	41023
ENSMUSG00000048852.13	RP23-14F5.7	1779.2	6.70585	0.372199	18.0169	1.43673e-72	1.25191e-69	39.106	45.6152	38.9174	1202.51	824.728	1080.6	6099.15	2197.39	4484.77
ENSMUSG00000112627.1	RP23-413G8.2	609.978	3.45773	0.192012	18.0079	1.68826e-72	1.40712e-69	104.283	111.757	113.972	491.639	484.445	557.351	1222.94	1018.67	1384.74
ENSMUSG00000029298.15	Gbp9	10755.4	5.35351	0.303314	17.65	1.01706e-69	8.12374e-67	522.416	960.199	431.566	5123.5	6030.69	5918.44	30378.7	20157.5	27275.7
ENSMUSG00000034438.16	Gbp8	822.95	6.08003	0.34639	17.5526	5.68383e-69	4.35836e-66	23.0625	47.8959	24.3234	322.784	407.607	546.632	1897.05	1560.61	2576.58
ENSMUSG00000000791.9	Il12rb1	688.746	6.3614	0.36251	17.5482	6.13784e-69	4.52547e-66	42.1142	13.6845	12.5092	133.405	125.136	114.004	1921.9	2087.31	1748.65
ENSMUSG00000074342.3	AC121847.1	3654.3	3.52049	0.202383	17.3952	8.97092e-68	6.36935e-65	360.978	504.048	445.465	6050.8	4676.87	5879.47	5672.52	5053.56	4244.95
ENSMUSG00000078853.8	Igtp	33924.3	5.63988	0.325787	17.3115	3.8513e-67	2.63676e-64	1575.27	1767.59	1002.82	29172.8	19641.3	35716.2	88103.1	47663.4	80675.9
ENSMUSG00000039384.8	Dusp10	749.603	4.45359	0.258245	17.2456	1.20749e-66	7.9819e-64	67.1821	123.161	58.3761	423.537	422.243	465.758	1777.97	1552.14	1856.06
ENSMUSG00000030156.5	Cd69	3227.36	6.36153	0.381605	16.6705	2.14892e-62	1.37316e-59	110.299	66.142	56.2913	2732.47	4345.37	2539.26	8625.79	3733.44	6837.17
ENSMUSG00000029204.7	Rhoh	1462.96	2.24744	0.135723	16.559	1.37874e-61	8.52597e-59	490.329	483.521	412.108	1826.62	1750.44	1652.56	2299.86	2144.89	2106.31
ENSMUSG00000063506.14	Arhgap22	1261.94	-3.23578	0.195867	-16.5203	2.61876e-61	1.5688e-58	2459.67	2565.85	3207.21	696.878	818.142	736.638	252.664	351.412	269.024
ENSMUSG00000092021.8	Gbp11	1253.8	9.61363	0.582605	16.5011	3.60115e-61	2.09194e-58	6.01631	4.56152	2.08486	619.447	461.76	901.31	3600.46	1701.17	3987.39
ENSMUSG00000105504.4	Gbp5	37544.8	7.56486	0.459409	16.4665	6.38614e-61	3.60066e-58	703.908	253.164	337.053	35163.9	20614.5	35235.9	116473	37726.5	91395.1
ENSMUSG00000078921.3	Tgtp2	4678.11	6.88615	0.420596	16.3724	3.01349e-60	1.65053e-57	115.313	123.161	35.4426	3524.5	3022.3	3439.59	14773.6	6886.84	10182.2
ENSMUSG00000037731.5	Themis2	30105.2	3.26542	0.201737	16.1865	6.28047e-59	3.34435e-56	5652.32	5298.2	5428.98	37065.1	25377.8	34607.4	57966.7	42393.9	57156.1
ENSMUSG00000105338.1	RP23-100J23.5	3534.2	4.88602	0.303608	16.0932	2.84915e-58	1.47617e-55	278.756	191.584	178.603	4545.1	3065.47	4323.37	8270.61	4224.57	6729.77
ENSMUSG00000073555.1	AC102225.2	3751.16	5.77182	0.358995	16.0777	3.65428e-58	1.84349e-55	191.519	141.407	79.9197	3458.27	2655.67	4772.56	7822.23	5339.78	9299.05
ENSMUSG00000028270.12	Gbp2	196624	7.73493	0.481869	16.0519	5.541e-58	2.72362e-55	3927.65	1756.18	1073.7	115253	78775.1	129103	653168	228250	558311
ENSMUSG00000063236.6	RP24-324P21.9	1332.09	2.53751	0.158344	16.0253	8.50747e-58	4.0772e-55	464.258	394.571	500.367	851.739	838.632	990.954	2561.85	2502.23	2884.19
ENSMUSG00000039899.5	Fgl2	30553.3	4.93502	0.308155	16.0147	1.00851e-57	4.7154e-55	2267.15	3282.01	1337.79	17455.5	22880.2	17382.1	78433.6	72425.7	59515.8
ENSMUSG00000043391.10	RP23-245B21.4	2000.04	-1.92278	0.120188	-15.9981	1.3175e-57	6.01345e-55	3606.78	3459.91	3715.92	1514.1	1339.18	1518.1	959.917	895.89	990.592
ENSMUSG00000022126.6	Acod1	41869.5	8.56909	0.537511	15.9422	3.23015e-57	1.44004e-54	506.373	196.145	124.397	29991.9	13733.5	17864.5	168026	51055.6	95327.2
ENSMUSG00000018899.16	Irf1	65254.1	4.9386	0.314412	15.7074	1.34536e-55	5.86149e-53	4878.22	3085.87	3458.09	93007.5	53568.5	78914.8	148335	75568.9	126470
ENSMUSG00000078922.9	Tgtp1	1782.91	9.37306	0.598118	15.6709	2.39089e-55	1.01852e-52	11.0299	4.56152	5.55963	619.447	352.723	558.325	7957.88	1573.31	4963.39
ENSMUSG00000060183.6	Cxcl11	1147.59	9.57521	0.61404	15.5938	8.02223e-55	3.34318e-52	6.01631	6.84227	1.38991	333.979	219.537	336.164	4411.27	1366.7	3646.42
ENSMUSG00000049488.14	Tmem67	1433.57	2.68846	0.174701	15.3889	1.94294e-53	7.92473e-51	379.027	367.202	469.094	1167.99	1268.19	1369.99	2634.33	2305.77	2940.49
ENSMUSG00000028268.14	Gbp3	26768.4	5.71132	0.372848	15.3181	5.79007e-53	2.31241e-50	1568.25	1076.52	634.493	25319.9	16138.2	24423.1	77486.1	36316.6	57952.7
ENSMUSG00000091191.1	Gm17334	5060.8	4.96165	0.329197	15.072	2.47534e-51	9.68414e-49	396.074	221.234	250.878	7456.68	4387.09	5684.59	11942.5	6069.7	9138.47
ENSMUSG00000069874.7	Irgm2	20220	4.04421	0.269474	15.0078	6.52965e-51	2.50347e-48	1901.15	2517.96	1459.4	28925.5	19961.1	30368.8	36355.7	25146.7	35343.3
ENSMUSG00000087639.1	RP23-156O5.3	768.1	-3.10861	0.207302	-14.9956	7.8505e-51	2.95086e-48	1500.07	1443.72	2054.28	419.806	471.273	444.322	170.859	226.089	182.477
ENSMUSG00000050370.4	Ch25h	3811.1	6.51345	0.43505	14.9717	1.12366e-50	4.14243e-48	45.1223	130.003	54.2064	2544.02	6893.47	4291.21	5497.52	6934.26	7910.13
ENSMUSG00000039304.11	Tnfsf10	3907.03	4.93851	0.330908	14.9241	2.29699e-50	8.30818e-48	413.12	291.937	146.635	2690.49	3047.18	2528.54	9501.83	7152.72	9390.81
ENSMUSG00000059089.4	Fcgr4	24043.3	3.92537	0.265739	14.7715	2.23709e-49	7.94166e-47	2950	4119.05	2397.59	20772	19204.4	23253.8	60818.5	35216.6	47657.9
ENSMUSG00000098871.1	Mir6381	6429.24	7.45411	0.50498	14.7612	2.6061e-49	9.08343e-47	156.424	82.1073	30.578	4173.8	2626.4	3705.6	22707.7	8703.17	15677.4
ENSMUSG00000039699.13	Batf2	8297.46	6.13046	0.419268	14.6218	2.0389e-48	6.9796e-46	294.799	294.218	183.468	9207.74	4289.76	6434.87	27315.7	8632.04	18024.6
ENSMUSG00000039982.7	Dtx4	1653.01	-3.16685	0.217503	-14.5601	5.04194e-48	1.69568e-45	4502.2	2800.77	3996.68	804.161	830.582	684.021	404.884	474.195	379.553
ENSMUSG00000068606.5	Gm4841	2465.54	10.1425	0.697495	14.5413	6.6328e-48	2.19226e-45	9.02446	0	4.16972	2064.51	758.135	2504.18	8003.45	1901.86	6944.57
ENSMUSG00000037997.12	Parp11	2638.19	2.34444	0.161722	14.4968	1.26979e-47	4.12575e-45	811.199	1014.94	831.86	2410.62	2873.01	2356.07	4233.16	4887.6	4325.24
ENSMUSG00000071042.11	Rasgrp3	2983.01	-3.09976	0.214127	-14.4763	1.71073e-47	5.46578e-45	5782.67	5352.94	7053.78	2241.76	2132.44	2160.22	587.133	616.454	919.686
ENSMUSG00000026580.16	Selp	1957.31	9.05194	0.631437	14.3354	1.31397e-46	4.12931e-44	3.00815	6.84227	9.0344	3222.24	1077.93	3138.51	5194.11	1366.7	3597.41
ENSMUSG00000042726.14	Trafd1	19389.1	2.21183	0.155081	14.2624	3.75187e-46	1.16005e-43	7162.41	7129.65	6742.44	20835.4	16067.2	19128.2	35996.4	28978.4	32462.2
ENSMUSG00000005514.14	Por	9255.71	-1.70695	0.120446	-14.1719	1.36832e-45	4.16361e-43	13798.4	14250.2	12596.7	9850.51	10366.5	9993.34	3900.76	4538.72	4006.16
ENSMUSG00000082292.3	RP24-499A8.3	15079.6	5.19317	0.366687	14.1624	1.56543e-45	4.68896e-43	595.614	1113.01	328.018	20466	18924.8	20143.6	28996.3	21560.6	23588.6
ENSMUSG00000030149.15	Klrk1	348.899	5.71072	0.404566	14.1157	3.04118e-45	8.96913e-43	20.0544	15.9653	10.4243	245.353	311.011	161.749	901.928	940.769	532.834
ENSMUSG00000090942.1	F830016B08Rik	1400.96	7.9584	0.569402	13.9768	2.16069e-44	6.27583e-42	16.0435	13.6845	13.2041	820.953	330.769	719.099	5310.09	1044.92	4339.83
ENSMUSG00000020573.17	Pik3cg	3413.56	-1.94625	0.139499	-13.9517	3.071e-44	8.78672e-42	5657.33	5165.92	6056.52	3278.22	3147.43	3035.22	1515.98	1581.78	1283.6
ENSMUSG00000037321.17	Tap1	17784.4	3.74594	0.268947	13.9282	4.27179e-44	1.20427e-41	2412.54	3396.05	2183.54	15640.1	11172.2	18131.4	41271.2	27130.7	38721.7
ENSMUSG00000020407.13	Upp1	780.714	8.53978	0.614059	13.9071	5.73698e-44	1.59388e-41	3.00815	18.2461	2.08486	101.686	158.067	67.2329	3291.88	1804.48	1579.73
ENSMUSG00000064181.6	Rab3ip	518.028	2.18804	0.158323	13.8201	1.92865e-43	5.28174e-41	145.394	130.003	172.349	713.67	709.105	711.304	716.572	698.591	665.26
ENSMUSG00000057135.12	Scimp	443.976	5.02412	0.363882	13.807	2.31229e-43	6.24318e-41	35.0951	25.0883	22.9335	444.994	306.62	447.245	1196.01	547.018	970.78
ENSMUSG00000033538.13	Casp4	7886.52	3.57435	0.259394	13.7796	3.38264e-43	9.00628e-41	1498.06	1224.77	779.043	9072.47	8151.42	8578.52	17084.9	12148.7	12440.8
ENSMUSG00000029156.11	Sgcb	3839.64	2.06418	0.149963	13.7645	4.1662e-43	1.09406e-40	1379.74	1765.31	1510.13	3321.13	3523.57	3633.5	6646.93	5813.12	6963.34
ENSMUSG00000031897.9	Psmb10	6404.09	2.11882	0.154706	13.6958	1.07556e-42	2.78627e-40	2856.74	2812.17	2217.6	5365.12	4656.38	5508.22	11675.4	10835.4	11709.8
ENSMUSG00000108112.1	RP24-491O6.1	2774.23	3.19019	0.23373	13.6491	2.04446e-42	5.22564e-40	662.797	764.054	451.72	1978.68	2357.1	1689.59	6345.6	5239.01	5479.54
ENSMUSG00000024754.12	Tmem2	8774.03	3.36681	0.25015	13.4592	2.71872e-41	6.85761e-39	783.123	1040.03	815.181	18070.3	13668.4	17427.9	11037.5	6276.31	9847.52
ENSMUSG00000061981.14	Flot2	5949.18	1.79395	0.133799	13.4077	5.44775e-41	1.35628e-38	2495.76	2955.86	2523.38	5588.08	6137.53	6228.3	9029.64	8662.53	9921.56
ENSMUSG00000029279.15	Brdt	301.346	3.5411	0.264555	13.3851	7.38828e-41	1.81581e-38	32.087	52.4574	40.3073	368.496	460.296	354.678	540.536	482.663	380.596
ENSMUSG00000070034.13	Sp110	2373.62	2.54213	0.190282	13.3598	1.03879e-40	2.5207e-38	743.014	827.915	776.958	1969.36	1532.37	1852.31	5143.37	3621.67	4895.61
ENSMUSG00000034118.15	Tpst1	2764.6	2.60038	0.195031	13.3332	1.48461e-40	3.55751e-38	639.734	864.407	553.183	3684.03	3187.68	3558.47	4525.17	3932.43	3936.3
ENSMUSG00000046031.7	Fam26f	13717.6	6.01983	0.456163	13.1967	9.17179e-40	2.17066e-37	772.093	198.426	376.665	13392.7	7245.46	13779.8	38380.1	19196.4	30117.1
ENSMUSG00000063760.9	Rnf217	1262.97	2.39584	0.181891	13.1718	1.27477e-39	2.98016e-37	437.185	348.956	398.903	1254.75	1447.48	1212.14	2451.05	1829.88	1986.4
ENSMUSG00000036986.16	Pml	9093.39	2.68761	0.205022	13.1089	2.92693e-39	6.76015e-37	2013.46	2574.98	1796.46	13473.9	9712.33	11200.6	15246.8	12175.8	13646.2
ENSMUSG00000045312.12	Lhfpl2	5492.84	-4.81053	0.367176	-13.1014	3.23074e-39	7.37302e-37	15099.9	12776.8	12973.4	2627.05	2618.35	1885.44	473.227	756.172	225.229
ENSMUSG00000017652.16	Cd40	10418.7	5.58882	0.428139	13.0537	6.05089e-39	1.36465e-36	723.962	444.748	408.633	7034.08	3318.67	5877.52	39700.4	12374	23886.8
ENSMUSG00000021266.16	Wars	11758.7	3.79976	0.292168	13.0054	1.14029e-38	2.54178e-36	1909.17	2011.63	1691.52	8029.48	5650.89	8403.13	30236.9	15508.7	32387.1
ENSMUSG00000023903.7	Mmp25	235.774	5.42979	0.417988	12.9903	1.38869e-38	3.05991e-36	20.0544	15.9653	9.0344	83.0282	70.2519	40.9244	817.016	450.485	615.21
ENSMUSG00000028894.18	Inpp5b	9802.25	3.23214	0.250548	12.9003	4.48446e-38	9.769e-36	1597.33	2408.48	1780.47	10183.6	7910.66	10037.2	22123.6	13205.5	18973.5
ENSMUSG00000029265.4	Dr1	11451.5	2.0524	0.159388	12.8767	6.0853e-38	1.31073e-35	3194.66	3619.56	3448.36	16147.6	18788	15311.6	16372.4	12893.9	13287.5
ENSMUSG00000039682.12	Lap3	2708.53	2.00259	0.155875	12.8474	8.89348e-38	1.89431e-35	1173.18	1382.14	1050.77	2169	2176.35	2024.78	5265.56	4354.13	4780.91
ENSMUSG00000014846.12	Tppp3	142.283	3.89817	0.303805	12.8311	1.09735e-37	2.31167e-35	16.0435	22.8076	17.3738	118.479	150.017	152.005	220.563	291.291	291.964
ENSMUSG00000016496.7	Cd274	25722	5.08402	0.39695	12.8077	1.48419e-37	3.09261e-35	2249.1	1012.66	1157.79	33259.8	18210.6	25602.1	71199.5	29458.5	49348.1
ENSMUSG00000020826.8	Nos2	1371.53	11.884	0.92834	12.8013	1.61213e-37	3.32306e-35	3.00815	0	0	148.331	82.6924	95.4902	6084.65	2074.6	3854.97
ENSMUSG00000014599.10	Csf1	2339.85	2.94122	0.230539	12.758	2.81225e-37	5.7352e-35	589.598	465.275	349.562	2914.38	3129.87	2836.45	4005.35	2889.2	3878.95
ENSMUSG00000078920.3	Ifi47	39820.4	5.04815	0.395967	12.7489	3.16037e-37	6.3773e-35	2941.97	3288.85	1238.41	39225.7	26553	38171.7	114393	49581.3	82989.7
ENSMUSG00000020547.5	Bzw2	2590.83	3.42112	0.268627	12.7355	3.75251e-37	7.4933e-35	381.033	542.82	367.631	2857.48	2347.58	3060.56	5725.33	3141.54	4893.52
ENSMUSG00000000247.11	Lhx2	187.884	5.45411	0.428487	12.7288	4.09239e-37	8.08774e-35	11.0299	11.4038	4.16972	215.5	246.613	148.107	413.168	357.34	283.622
ENSMUSG00000026068.11	Il18rap	2878.44	5.24175	0.413213	12.6853	7.13107e-37	1.39492e-34	60.1631	253.164	122.312	2797.77	3713.11	2768.24	6226.51	5703.04	4261.63
ENSMUSG00000027204.13	Fbn1	298.278	3.90032	0.308684	12.6353	1.34846e-36	2.6111e-34	53.1441	31.9306	38.2225	228.561	284.667	171.493	516.719	788.349	571.415
ENSMUSG00000029502.14	Golga3	10864	2.08853	0.166241	12.5633	3.36227e-36	6.44547e-34	3620.81	3715.35	3797.92	14627	11353.7	13303.3	16878.8	13242.7	17236.3
ENSMUSG00000074151.13	Nlrc5	11474.5	3.26263	0.259929	12.552	3.87458e-36	7.35404e-34	2144.81	2789.37	2042.47	12107.2	7642.09	9643.53	27120	16289.4	23491.6
ENSMUSG00000039232.12	Stx11	2936.81	4.36717	0.348832	12.5194	5.8465e-36	1.0988e-33	349.949	271.41	225.165	3225.04	2714.21	2178.73	9037.92	3553.08	4875.8
ENSMUSG00000020653.12	Klf11	131.631	-3.0377	0.243068	-12.4973	7.71868e-36	1.43657e-33	308.837	257.726	277.982	72.7663	71.7155	92.567	37.2783	35.5646	30.2391
ENSMUSG00000025790.14	Slco3a1	1852.69	4.15363	0.332844	12.4792	9.69275e-36	1.78663e-33	369	200.707	243.929	528.955	341.746	445.296	6255.51	2985.74	5303.31
ENSMUSG00000037400.17	Atp11b	7461.77	1.97059	0.15795	12.4761	1.00861e-35	1.84143e-33	2764.49	3056.22	3360.8	6796.19	7902.61	7282.59	13744.3	10769.3	11479.4
ENSMUSG00000003808.18	Farsa	3338.16	1.62594	0.130557	12.4539	1.33207e-35	2.40903e-33	1374.73	1587.41	1720.71	3609.4	3486.98	3807.91	4794.41	4794.45	4867.45
ENSMUSG00000054676.15	RP23-89C10.1	3574.61	2.09459	0.168291	12.4462	1.46634e-35	2.62708e-33	1214.29	1087.92	1189.07	5005.95	3702.86	5041.49	5326.66	4719.09	4884.14
ENSMUSG00000073902.5	RP23-465M17.2	2093.6	3.61515	0.291114	12.4183	2.07861e-35	3.68953e-33	307.834	474.398	248.793	1437.6	2394.42	1455.74	4281.83	4379.53	3862.26
ENSMUSG00000050075.8	Gpr171	384.634	3.68451	0.29788	12.3691	3.83922e-35	6.7521e-33	30.0815	41.0536	21.5436	729.529	785.211	733.715	485.654	329.396	305.519
ENSMUSG00000026797.16	Stxbp1	1824.51	2.03897	0.16587	12.2926	9.92843e-35	1.73025e-32	793.15	837.038	990.309	973.016	917.666	1120.55	3481.38	3298.2	4009.29
ENSMUSG00000028793.15	Rnf19b	20393.5	3.62449	0.295291	12.2743	1.24433e-34	2.14899e-32	4238.49	2734.63	3295.47	19004.1	11586.4	15987.8	55162.6	28946.2	42586.1
ENSMUSG00000050029.7	Rap2c	10339.3	2.57269	0.211774	12.1483	5.85779e-34	1.00262e-31	2761.49	3108.67	2470.56	11968.2	12109.7	11047.6	21521	13416.3	14650.3
ENSMUSG00000020476.14	Dbnl	5785.73	1.60555	0.132596	12.1086	9.5089e-34	1.61315e-31	3448.35	3101.83	2779.82	5104.84	4728.1	4523.12	9823.87	9201.08	9360.57
ENSMUSG00000046879.7	Irgm1	57810.9	4.2501	0.352862	12.0447	2.06926e-33	3.47962e-31	5140.93	7606.33	2994.56	78511.1	55908.8	70740.7	131557	68287.5	99551.3
ENSMUSG00000023106.15	Denr	3204.99	2.32486	0.193438	12.0186	2.83745e-33	4.7299e-31	1216.3	1172.31	890.236	3254.89	2952.04	2958.25	6564.09	4903.69	4933.15
ENSMUSG00000063388.4	BC023105	523.845	8.64463	0.719367	12.017	2.89297e-33	4.78088e-31	6.01631	2.28076	0	605.453	379.068	632.379	1489.06	460.647	1139.7
ENSMUSG00000029798.11	Herc6	6702.66	3.06417	0.255049	12.014	2.9981e-33	4.91228e-31	1531.15	2134.79	1124.44	5049.8	6032.88	4476.35	15212.7	11804.9	12956.9
ENSMUSG00000031948.14	Kars	3872.82	1.54649	0.129042	11.9843	4.29227e-33	6.97312e-31	1893.13	2255.67	1881.93	3538.5	3926.06	3784.53	6015.27	5607.36	5952.93
ENSMUSG00000082088.1	AC124730.5	247.905	2.56388	0.213972	11.9823	4.39912e-33	7.08665e-31	86.2337	82.1073	86.8692	168.855	144.895	145.184	572.636	411.534	532.834
ENSMUSG00000060675.13	Pla2g16	899.821	3.4173	0.285742	11.9594	5.80013e-33	9.2657e-31	224.609	223.514	159.839	331.18	329.306	367.345	2672.65	1335.37	2454.58
ENSMUSG00000085977.1	AC102225.3	518.157	6.93423	0.583153	11.8909	1.31956e-32	2.09057e-30	15.0408	4.56152	8.33945	511.23	212.219	315.702	2008.89	475.889	1111.55
ENSMUSG00000000409.14	Lck	237.077	5.48016	0.460978	11.8881	1.36456e-32	2.14415e-30	7.01903	22.8076	6.25458	288.267	265.64	188.057	617.163	422.542	315.947
ENSMUSG00000036362.2	P2ry13	2018.5	2.01309	0.169692	11.8632	1.83731e-32	2.86351e-30	551.495	634.051	590.711	2545.89	3419.66	3271.03	2586.7	2357.43	2209.54
ENSMUSG00000022035.6	Ccdc25	3450.94	2.80627	0.237368	11.8224	2.989e-32	4.59924e-30	836.267	976.164	581.676	3840.76	4599.3	3539.96	6604.47	5286.43	4793.42
ENSMUSG00000024349.9	Tmem173	13960	3.14867	0.266336	11.8222	2.99898e-32	4.59924e-30	2051.56	2497.43	3482.41	14642.8	12668.8	19039.6	27238	18396.2	25623
ENSMUSG00000019794.13	Katna1	2854.42	2.5009	0.21185	11.805	3.676e-32	5.59276e-30	1021.77	903.18	1020.89	2149.41	1808.99	2090.07	7002.11	4203.4	5489.96
ENSMUSG00000020572.8	Mampt	52654.6	3.41499	0.28938	11.8011	3.85319e-32	5.81619e-30	10342	11424.3	7107.99	51462.6	42717.6	42909.2	144720	71773.7	91434.7
ENSMUSG00000074794.10	Arrdc3	782.684	-3.75265	0.320934	-11.6929	1.38572e-31	2.07533e-29	1398.79	1316	2308.64	462.719	544.452	641.148	77.6632	159.194	135.555
ENSMUSG00000023961.16	Enpp4	1358.66	3.69473	0.316045	11.6905	1.42561e-31	2.11852e-29	283.769	132.284	178.603	1473.05	1130.62	1264.76	3369.55	1837.51	2557.81
ENSMUSG00000021758.14	Ddx4	127.587	3.98497	0.342601	11.6315	2.8501e-31	4.2028e-29	16.0435	2.28076	22.2385	120.344	117.818	114.978	274.41	259.114	221.058
ENSMUSG00000022184.8	Fbxo4	1056.66	1.90028	0.163523	11.6209	3.22892e-31	4.72506e-29	379.027	428.783	373.19	1215.57	1487	1241.37	1463.17	1608.03	1313.84
ENSMUSG00000027639.16	Samhd1	68335.7	3.39528	0.292338	11.6142	3.48858e-31	5.06637e-29	14223.6	13020.8	12945.6	61961.5	37646.2	52354.9	187251	87831.9	147786
ENSMUSG00000097558.1	Gm26902	697.922	6.01019	0.517598	11.6117	3.59391e-31	5.1801e-29	9.02446	47.8959	10.4243	491.639	1077.2	767.819	1001.34	1409.88	1466.08
ENSMUSG00000007036.15	Abhd16a	4896.16	1.98316	0.170977	11.599	4.16963e-31	5.96506e-29	2198.96	2155.32	2247.48	3984.42	3150.36	4221.06	9476.98	7446.56	9184.35
ENSMUSG00000040328.15	Olfr56	5253.54	5.02908	0.434985	11.5615	6.45656e-31	9.16832e-29	308.837	634.051	125.787	4054.39	3903.37	3644.22	12258.4	11504.3	10848.5
ENSMUSG00000032841.15	Prr5l	2027.03	3.40892	0.295066	11.5531	7.12118e-31	1.00377e-28	204.554	417.379	225.86	2684.89	2922.04	2891.01	3467.92	2184.68	3244.97
ENSMUSG00000033450.8	Tagap	5888.81	4.81898	0.4193	11.4929	1.43176e-30	2.00342e-28	326.886	403.694	375.275	7980.04	6282.42	6440.71	15495.4	3646.22	12048.7
ENSMUSG00000041449.16	Serpina3h	255.452	8.92143	0.77774	11.471	1.84586e-30	2.56413e-28	0	4.56152	1.38991	63.4373	75.3744	96.4646	876.04	502.986	678.816
ENSMUSG00000027199.14	Gatm	5690.14	2.09762	0.183743	11.416	3.47681e-30	4.795e-28	1980.37	2517.96	1822.17	6083.45	6242.91	5561.81	10293	7737	8972.67
ENSMUSG00000030718.9	Ppme1	2005.96	1.43671	0.126119	11.3917	4.60013e-30	6.29889e-28	990.685	1026.34	986.834	2353.71	2423.69	2148.53	2948.09	2655.49	2520.27
ENSMUSG00000026159.13	Agfg1	6736.38	1.64258	0.144299	11.3832	5.07261e-30	6.89659e-28	2718.37	3085.87	2658.89	8966.12	8781.49	8020.2	9970.91	8293.33	8132.24
ENSMUSG00000090272.8	Mndal	14881.5	3.20705	0.28296	11.3339	8.91208e-30	1.20313e-27	2699.32	3731.32	1937.53	17114.1	14657	16600.7	30711.1	18137.1	28345.5
ENSMUSG00000022788.16	Fgd4	3937.94	-2.20481	0.194832	-11.3165	1.08785e-29	1.45832e-27	6274.01	8516.35	6926.6	2921.85	3426.24	2668.85	1436.25	1841.74	1429.58
ENSMUSG00000037820.15	Tgm2	10556	2.48993	0.220369	11.2989	1.32859e-29	1.76869e-27	3422.28	4385.9	2806.92	8652.66	8423.64	7740.55	24300.3	18658.7	16612.7
ENSMUSG00000041308.6	Sntb2	1775.04	-1.59873	0.141506	-11.298	1.34238e-29	1.77471e-27	2392.49	2413.04	2398.29	2390.09	2146.34	1857.19	747.637	817.987	812.285
ENSMUSG00000029534.17	St7	819.698	2.79653	0.247744	11.288	1.50472e-29	1.97572e-27	196.533	275.972	244.624	536.418	527.621	639.199	2090.69	1204.12	1662.11
ENSMUSG00000026786.14	Apbb1ip	3366.6	-1.81752	0.161236	-11.2724	1.79564e-29	2.34167e-27	5558.07	6155.77	5545.04	2643.84	3166.46	2335.61	1486.99	1694.4	1713.2
ENSMUSG00000050967.5	Creg2	385.752	-2.38391	0.212344	-11.2267	3.01593e-29	3.90645e-27	719.951	588.436	735.956	355.436	327.842	352.729	118.048	165.968	107.401
ENSMUSG00000034422.14	Parp14	61340	2.85419	0.25434	11.222	3.1817e-29	4.0935e-27	14497.3	17509.4	10796.1	80425.4	55085.5	64296.1	125580	81858.8	102011
ENSMUSG00000050350.8	GRp18	1006.14	5.82776	0.521515	11.1747	5.42469e-29	6.93276e-27	44.1196	20.5268	29.1881	1404.95	613.241	1516.15	2803.12	678.268	1945.73
ENSMUSG00000024401.14	Tnf	10978.8	6.13926	0.549569	11.171	5.65213e-29	7.17559e-27	587.593	351.237	329.408	4474.2	1091.1	2535.36	40488.4	10067.3	38884.4
ENSMUSG00000027669.14	Gnb4	1092.61	2.94136	0.264545	11.1186	1.01888e-28	1.28499e-26	313.851	403.694	221.69	534.553	720.082	492.067	2591.88	2577.59	1978.05
ENSMUSG00000090069.2	RP23-17J18.2	1601.73	4.43781	0.399276	11.1147	1.06458e-28	1.33385e-26	132.359	141.407	120.922	2137.28	1663.36	1686.67	4116.15	1124.52	3292.93
ENSMUSG00000041515.10	Irf8	37129	2.9031	0.261222	11.1135	1.07832e-28	1.34229e-26	11200.4	6858.24	9210.92	41134.4	27284.1	34439.8	84535.8	54394.4	65102.7
ENSMUSG00000040111.16	Gramd1b	3549.43	-2.2028	0.198699	-11.0861	1.46483e-28	1.81166e-26	6170.73	6050.85	8313.73	2230.57	2493.21	2224.53	1218.79	1709.64	1532.81
ENSMUSG00000054321.6	Taf4b	565.972	3.08803	0.278651	11.0821	1.53295e-28	1.88375e-26	89.2419	132.284	86.8692	733.261	884.003	599.25	1109.03	770.567	689.243
ENSMUSG00000040978.4	RP23-219P13.3	99.2887	4.44039	0.401184	11.0682	1.78933e-28	2.18481e-26	6.01631	13.6845	13.2041	37.3161	60.7386	63.3353	244.38	187.984	266.938
ENSMUSG00000025997.13	Ikzf2	424.372	3.23804	0.292749	11.0608	1.94391e-28	2.35853e-26	77.2093	84.388	88.9541	436.598	294.912	470.63	923.674	536.857	906.131
ENSMUSG00000020868.15	Xylt2	3901.4	-3.11172	0.282452	-11.0168	3.17099e-28	3.82314e-26	8734.68	6748.76	7431.14	2975.96	3220.61	3351.9	600.595	1306.58	742.422
ENSMUSG00000026104.14	Stat1	31244	3.34012	0.303229	11.0152	3.22882e-28	3.86852e-26	6226.88	8046.51	4463.69	27468.4	17482.5	27827.6	71748.3	44288.1	73643.7
ENSMUSG00000032596.14	Uba7	8348.55	1.70004	0.154504	11.0033	3.68579e-28	4.3886e-26	3254.82	4447.48	4305.24	8135.84	7882.85	8118.61	12822.7	12652.5	13516.9
ENSMUSG00000063286.7	RP23-465M17.1	39525.6	3.1453	0.286252	10.9879	4.37171e-28	5.17319e-26	7248.65	9811.82	5401.88	50939.2	40493.6	43167.4	85448.1	46324.6	66895.2
ENSMUSG00000015947.10	Fcgr1	29847.4	2.43882	0.221977	10.9868	4.42306e-28	5.20185e-26	8722.64	11392.4	7110.77	32274.7	26851.6	34715.5	54578.6	41314.2	51666.1
ENSMUSG00000028664.14	Ephb2	284.425	3.82925	0.348555	10.9861	4.45911e-28	5.21226e-26	29.0788	75.265	29.1881	258.414	203.438	197.801	695.862	581.736	489.039
ENSMUSG00000050953.10	Gja1	1956.02	4.20969	0.383371	10.9807	4.73166e-28	5.49733e-26	166.451	225.795	99.3784	3189.59	2493.94	2433.05	4751.95	2153.35	2090.67
ENSMUSG00000053113.3	Socs3	12275.9	5.26652	0.480615	10.9579	6.09051e-28	7.03343e-26	733.99	317.025	608.78	19610.5	11012.7	14177.4	29031.5	7240.79	27750.1
ENSMUSG00000045502.6	Hcar2	3194.26	6.1697	0.564304	10.9333	7.99039e-28	9.1722e-26	162.44	50.1767	66.7156	3853.82	1402.11	2958.25	11194.9	2533.56	6526.43
ENSMUSG00000021338.17	Lrrc16a	341.647	2.46103	0.225465	10.9154	9.73295e-28	1.10675e-25	146.397	159.653	105.633	137.137	172.703	122.773	752.815	684.196	793.516
ENSMUSG00000063889.16	Crem	2104.29	2.80955	0.257399	10.9151	9.75694e-28	1.10675e-25	486.318	488.082	392.649	2933.04	2735.43	2337.56	4428.87	2716.46	2420.17
ENSMUSG00000096727.2	Psmb9	3785.66	2.4667	0.226014	10.9139	9.88821e-28	1.11504e-25	1118.03	1530.39	918.034	3582.34	3093.28	4178.18	6897.52	5819.05	6934.14
ENSMUSG00000032578.7	Cish	970.461	5.08225	0.4659	10.9085	1.05015e-27	1.17727e-25	44.1196	22.8076	50.0367	1938.57	949.864	1654.51	1979.89	583.429	1510.91
ENSMUSG00000037447.16	Arid5a	7954.96	3.37838	0.309795	10.9052	1.08831e-27	1.21296e-25	938.544	775.458	847.844	17953.7	10680.5	13739.9	12374.3	5487.96	8796.45
ENSMUSG00000038213.7	Tapbpl	3611.17	3.00361	0.275775	10.8915	1.26507e-27	1.39375e-25	987.677	782.3	954.172	2809.9	1798.74	3291.49	8085.25	5308.44	8482.59
ENSMUSG00000041483.14	Zfp281	4059.13	2.07314	0.190344	10.8916	1.2642e-27	1.39375e-25	1453.94	1432.32	1111.93	5335.26	5617.96	4778.41	6593.08	4708.93	5500.39
ENSMUSG00000092283.1	RP23-396G1.3	2098.72	2.38118	0.219761	10.8353	2.3421e-27	2.56561e-25	738	941.953	581.676	1750.12	1579.2	1571.69	4632.87	3779.17	3313.79
ENSMUSG00000029860.16	Zyx	29668.1	3.918	0.361734	10.8312	2.45013e-27	2.66869e-25	4556.35	3573.95	4809.08	26117.5	11555	20769.1	89719.6	38171.9	67740.8
ENSMUSG00000063268.12	Parp10	6122.24	2.2796	0.210488	10.83	2.48046e-27	2.68647e-25	1787.85	2568.13	1544.88	7314.88	6366.58	6935.7	9482.15	10299.3	8800.62
ENSMUSG00000081512.1	RP23-123G8.2	2487.64	2.90532	0.268348	10.8267	2.57269e-27	2.7707e-25	567.538	670.543	821.435	1603.66	1189.16	2092.99	5643.52	3963.76	5836.15
ENSMUSG00000034872.6	Gipc3	80.5895	4.31046	0.398225	10.8242	2.64472e-27	2.83236e-25	7.01903	9.12303	9.72935	74.6321	67.3247	42.8731	161.539	182.057	171.007
ENSMUSG00000055782.9	Abcd2	760.424	-4.26311	0.394168	-10.8155	2.9079e-27	3.09691e-25	1621.39	1026.34	2503.22	464.585	316.865	643.097	56.953	105	106.358
ENSMUSG00000090222.2	Ifi203-ps	1231.31	3.76097	0.348054	10.8057	3.23421e-27	3.42541e-25	110.299	248.603	108.413	1545.82	1613.6	1244.3	2756.52	1578.39	1875.87
ENSMUSG00000032020.15	Ubash3b	4110.52	2.70732	0.250828	10.7935	3.69306e-27	3.88989e-25	1069.9	1484.77	956.256	3893.93	3331.11	3384.05	9321.65	5485.42	8067.59
ENSMUSG00000097125.1	Gm26885	2136.59	3.45287	0.320135	10.7857	4.02291e-27	4.21417e-25	469.272	332.991	316.899	2560.81	1433.58	1847.44	5291.45	2636.02	4340.88
ENSMUSG00000032515.8	Csrnp1	3570.43	4.78204	0.444049	10.7692	4.81299e-27	5.0144e-25	246.669	305.622	280.066	3698.95	2163.17	2561.67	11273.6	2583.52	9020.64
ENSMUSG00000024308.14	Tapbp	32647.9	1.94529	0.180917	10.7524	5.77361e-27	5.98271e-25	14623.6	14236.5	15177.8	29135.5	22149.1	28902.3	62079.8	46408.5	61118.5
ENSMUSG00000035392.17	Dennd1a	7692.32	1.95395	0.182078	10.7314	7.24856e-27	7.4707e-25	4219.44	3496.4	4097.45	4563.75	3310.62	3748.48	16450.1	13192.8	16151.9
ENSMUSG00000101628.1	RP24-194N4.4	22734.4	3.34453	0.311966	10.7208	8.12711e-27	8.33138e-25	4553.34	6005.24	3130.77	19560.1	12455.1	19921.4	52357.4	32543.3	54083.2
ENSMUSG00000062373.8	Tmem65	3078.37	-1.79919	0.168042	-10.7068	9.45981e-27	9.64599e-25	5972.19	4246.77	5093.32	2850.01	2692.26	2447.67	1565.69	1414.12	1423.32
ENSMUSG00000024339.12	Tap2	8378.25	2.80877	0.262679	10.6928	1.10054e-26	1.11626e-24	2225.03	2371.99	2727	5807.31	3970.7	6972.73	19048.2	12501.8	19779.5
ENSMUSG00000079442.12	St6galnac4	3502.71	1.97831	0.1852	10.682	1.23541e-26	1.24646e-24	1694.59	1270.38	1676.92	3128.95	2759.58	2664.96	6279.32	6876.68	5172.97
ENSMUSG00000031712.10	Il15	3218.12	1.99521	0.186917	10.6743	1.34258e-26	1.3475e-24	985.672	1249.86	974.325	3995.62	4528.32	4468.55	5091.6	3668.24	4000.95
ENSMUSG00000024942.16	Capn1	5191.2	1.3851	0.130545	10.6102	2.67242e-26	2.66825e-24	2863.76	3186.22	2917.42	4819.37	4447.09	5082.42	7967.2	7062.12	8375.19
ENSMUSG00000025950.16	Idh1	9239.8	-1.86635	0.176125	-10.5967	3.08537e-26	3.06459e-24	14422.1	13258	15542.6	8588.29	9376.43	10116.1	3220.43	4639.49	3994.69
ENSMUSG00000029648.13	Flt1	177.869	3.77187	0.356208	10.589	3.35312e-26	3.31336e-24	35.0951	34.2114	30.578	39.1819	75.3744	29.2317	526.038	396.292	434.818
ENSMUSG00000032508.8	Myd88	9537.18	2.37787	0.225087	10.5642	4.36542e-26	4.29155e-24	3048.26	2741.47	2623.45	13153	9655.98	10881	18444.5	10995.4	14291.6
ENSMUSG00000038058.14	Nod1	7982.73	3.55862	0.337601	10.5409	5.59578e-26	5.47301e-24	1410.82	823.354	1057.02	12507.4	6138.26	11083.7	16572.3	8868.3	13383.4
ENSMUSG00000037754.13	Ppp1r16b	116.402	6.74511	0.641025	10.5224	6.81283e-26	6.62954e-24	2.00544	2.28076	2.77982	70.9005	86.3513	103.285	211.244	200.686	368.083
ENSMUSG00000018427.7	Ypel2	426.873	-3.70586	0.352461	-10.5142	7.42881e-26	7.19244e-24	932.528	811.95	1272.46	193.111	139.772	260.162	51.7754	64.355	115.743
ENSMUSG00000017715.11	Pgs1	7297.21	2.33813	0.222484	10.5092	7.83201e-26	7.5447e-24	2183.92	2111.98	2651.25	8592.02	6780.77	8203.38	14128.5	8626.12	12397
ENSMUSG00000040522.5	Tlr8	7374.86	-2.01817	0.192793	-10.4681	1.21092e-25	1.16067e-23	12809.7	8956.54	12170	8583.63	6957.87	8516.16	2826.94	3067.03	2485.86
ENSMUSG00000051674.15	Dcun1d4	494.404	1.39737	0.13375	10.4476	1.50217e-25	1.43267e-23	292.794	294.218	291.186	422.604	404.68	431.655	740.389	749.398	822.712
ENSMUSG00000035725.13	Prkx	7354.77	2.08282	0.199647	10.4325	1.76225e-25	1.67239e-23	3026.2	2766.56	2719.35	8449.29	6499.77	6667.75	14869.9	10014	11180.1
ENSMUSG00000090246.1	AC147806.8	555.1	1.92404	0.184775	10.4129	2.16578e-25	2.04522e-23	256.696	209.83	202.232	563.473	665.198	556.376	907.106	896.737	738.251
ENSMUSG00000039997.16	Ifi203	22431.6	3.34743	0.321617	10.4081	2.27695e-25	2.13966e-23	3206.69	4807.84	2299.6	32294.3	26736.7	27641.5	46636.2	23036.6	35225.4
ENSMUSG00000067199.4	Frat1	146.549	-3.73456	0.359007	-10.4025	2.41578e-25	2.25905e-23	406.101	212.11	343.307	103.552	75.3744	106.208	14.4971	29.6372	28.1537
ENSMUSG00000037926.15	Ssh2	1152.26	-3.1763	0.305506	-10.3969	2.56256e-25	2.38468e-23	1964.32	1685.48	3538.01	764.046	678.37	944.183	215.386	276.049	304.477
ENSMUSG00000019943.10	Atp2b1	12690.5	-1.66163	0.16029	-10.3664	3.52642e-25	3.26577e-23	20438.4	16129.5	20991.1	14184.8	11594.5	12679.7	6017.34	6428.73	5750.64
ENSMUSG00000002307.15	Daxx	7362.45	2.30687	0.223546	10.3194	5.75672e-25	5.30559e-23	1959.31	2572.7	1715.15	10477.4	10347.5	8327.13	11773.7	10927.7	8161.43
ENSMUSG00000029207.16	Apbb2	987.222	-2.3839	0.231219	-10.3101	6.34277e-25	5.81775e-23	1166.16	1778.99	1497.63	1118.55	1362.59	1111.78	219.528	320.082	309.69
ENSMUSG00000048285.9	Frmd6	321.763	-2.47598	0.240412	-10.2989	7.1274e-25	6.5063e-23	670.818	465.275	524.69	316.254	358.577	260.162	118.048	82.9841	99.0592
ENSMUSG00000030102.11	Itpr1	3861.5	2.45411	0.238429	10.2928	7.5897e-25	6.89548e-23	1174.18	1961.45	1432.3	1717.47	2123.66	1364.15	8454.93	8312.81	8212.53
ENSMUSG00000022186.14	Oxct1	26243.2	1.32537	0.128805	10.2898	7.83787e-25	7.08735e-23	14651.7	16642.7	14622.5	22664.8	27118	25448.1	39932.3	36770.4	38338
ENSMUSG00000034987.4	Hrh2	165.702	3.96191	0.385442	10.2789	8.77571e-25	7.89814e-23	25.0679	34.2114	13.2041	109.149	158.067	97.4389	422.488	379.356	252.34
ENSMUSG00000097461.1	Gm26735	88.8977	-4.78231	0.466048	-10.2614	1.05157e-24	9.41988e-23	303.824	159.653	259.913	17.7251	20.4901	12.6671	8.28407	14.3952	3.12818
ENSMUSG00000053617.11	Sh3pxd2a	1212.27	-2.18366	0.21305	-10.2495	1.18917e-24	1.06029e-22	1726.68	1580.57	2281.53	1473.98	1182.57	1433.33	338.611	430.163	462.971
ENSMUSG00000076431.4	Sox4	133.9	-4.69591	0.458658	-10.2384	1.33469e-24	1.18453e-22	502.362	218.953	366.241	24.2554	31.467	20.4622	10.3551	23.7098	7.2991
ENSMUSG00000025911.14	Adhfe1	149.409	3.33006	0.325613	10.227	1.50057e-24	1.32562e-22	34.0924	22.8076	27.1032	143.667	152.944	102.311	340.682	316.695	204.375
ENSMUSG00000022257.4	Laptm4b	1538.94	2.71614	0.266093	10.2075	1.83576e-24	1.61429e-22	354.962	285.095	399.598	1657.77	2483.7	1805.54	1801.79	3011.99	2050
ENSMUSG00000090141.1	RP23-440J15.1	94.1726	3.93507	0.386001	10.1944	2.09938e-24	1.83768e-22	17.0462	13.6845	11.1193	61.5715	68.7883	41.8987	270.268	160.888	202.289
ENSMUSG00000029082.17	Bst1	1157.22	4.07982	0.400936	10.1757	2.54468e-24	2.21734e-22	80.2174	278.252	115.362	553.211	788.87	733.715	3116.88	2028.03	2720.48
ENSMUSG00000053318.7	Slamf8	6540.26	5.58437	0.549481	10.163	2.90095e-24	2.51634e-22	636.726	168.776	150.11	6036.81	2180.74	3744.58	21952.8	10212.1	13779.7
ENSMUSG00000047604.3	Frat2	148.175	-3.9126	0.385004	-10.1625	2.91522e-24	2.51733e-22	363.987	168.776	341.222	137.137	114.159	150.056	11.3906	22.863	23.9827
ENSMUSG00000024778.12	Fas	2914.17	3.45013	0.339693	10.1566	3.09694e-24	2.66226e-22	567.538	346.675	538.589	3008.61	2281.72	3554.57	7295.16	3042.47	5592.15
ENSMUSG00000030966.13	Trim21	6983.09	2.09887	0.20677	10.1508	3.28811e-24	2.81398e-22	1620.39	2210.05	1503.88	9923.27	13952.3	10836.2	7401.82	7922.45	7477.4
ENSMUSG00000019806.13	Aig1	1056.11	2.10027	0.207112	10.1408	3.6422e-24	3.10316e-22	435.18	458.432	468.399	720.2	744.231	837.001	2354.75	1455.61	2031.23
ENSMUSG00000067212.8	H2-T23	14632.7	2.04338	0.201736	10.129	4.11023e-24	3.48642e-22	5746.58	7672.47	5418.55	12237.8	10215.8	12797.6	27798.2	21648.7	28158.9
ENSMUSG00000070284.10	Gmppb	989.842	1.33524	0.131909	10.1225	4.39268e-24	3.70959e-22	596.617	595.278	651.172	779.906	825.46	799.974	1406.22	1655.45	1598.5
ENSMUSG00000085095.2	AC111086.2	266.845	-3.97818	0.393143	-10.1189	4.55407e-24	3.82901e-22	624.693	342.114	693.564	275.206	135.381	225.084	45.5624	38.105	21.8973
ENSMUSG00000024231.14	Cul2	2670.07	1.55268	0.153857	10.0917	6.01175e-24	5.03254e-22	1460.96	1514.42	1290.53	2288.41	2633.71	2345.36	4686.71	3679.25	4131.29
ENSMUSG00000005686.17	Ampd3	1541.83	-2.04498	0.203023	-10.0726	7.30008e-24	6.08446e-22	3078.34	2552.17	3242.65	1021.53	854	974.389	828.407	551.252	773.704
ENSMUSG00000019699.16	Akt3	3551.16	1.91755	0.190395	10.0714	7.39082e-24	6.13342e-22	1503.07	1772.15	1893.05	2116.75	2585.42	2564.59	7446.34	5280.5	6798.59
ENSMUSG00000027175.10	Tcp11l1	1845.51	1.51599	0.150894	10.0467	9.49714e-24	7.84742e-22	844.289	825.634	818.656	2670.9	2283.92	2048.17	2569.1	2264.28	2284.62
ENSMUSG00000054203.7	Ifi205	2098.5	5.42526	0.542133	10.0073	1.41625e-23	1.16522e-21	194.527	102.634	31.2729	1676.42	1666.29	1132.24	7282.73	4227.96	2572.41
ENSMUSG00000027340.15	Slc23a2	15837.3	1.57968	0.157898	10.0045	1.45652e-23	1.19322e-21	10979.8	8920.04	9765.49	8960.52	7668.44	7549.57	32114.2	25952	30626
ENSMUSG00000086593.2	RP23-202J6.3	355.825	7.4742	0.747201	10.0029	1.47943e-23	1.20684e-21	2.00544	6.84227	2.77982	594.258	183.679	625.558	910.212	206.614	670.474
ENSMUSG00000019944.14	Rhobtb1	177.349	-2.27579	0.227522	-10.0025	1.4861e-23	1.20714e-21	419.136	310.183	330.798	125.009	99.5235	91.5926	76.6276	70.2825	72.991
ENSMUSG00000096954.1	Gdap10	2251.52	3.84109	0.384037	10.0019	1.4954e-23	1.20957e-21	250.679	262.287	420.447	2366.77	1657.51	1887.39	6419.12	2119.48	4879.97
ENSMUSG00000078122.4	RP23-23B17.2	945.464	-2.93007	0.293074	-9.99771	1.55965e-23	1.25436e-21	1626.41	3031.13	2146.71	295.73	279.544	238.725	301.333	381.05	208.546
ENSMUSG00000103730.1	RP23-243M12.5	1565.02	2.55566	0.255631	9.99744	1.56386e-23	1.25436e-21	457.239	604.401	324.543	1526.23	1648.72	1432.35	3339.52	2431.1	2321.11
ENSMUSG00000037405.8	Icam1	41756.6	4.44045	0.444821	9.98255	1.81731e-23	1.45158e-21	5581.13	2782.52	5123.2	28607.4	13936.2	26865.9	139108	41808.8	111996
ENSMUSG00000027611.12	Procr	486.6	3.95828	0.396626	9.9799	1.86663e-23	1.48478e-21	85.231	93.5111	60.461	142.734	173.434	142.261	1997.5	620.688	1063.58
ENSMUSG00000049502.17	Dtx3l	16909.8	2.50759	0.251392	9.97481	1.96475e-23	1.55637e-21	4082.06	5227.5	3382.34	26455.2	18340.1	22569.8	29151.6	18330.2	24649
ENSMUSG00000110790.1	RP23-110E20.5	7778.33	4.6647	0.468326	9.96036	2.27232e-23	1.79261e-21	902.446	390.01	879.812	4945.31	2793.25	4892.41	27452.4	7271.27	20478.1
ENSMUSG00000079323.9	RP23-286E6.7	656.574	1.77194	0.178021	9.95353	2.43384e-23	1.91216e-21	294.799	253.164	364.851	663.293	565.674	612.891	1088.32	989.035	1077.14
ENSMUSG00000110388.1	RP24-163M14.3	262.28	-3.08749	0.311155	-9.92265	3.31822e-23	2.59634e-21	564.53	572.47	391.954	231.36	268.567	152.979	55.9175	77.9035	44.8373
ENSMUSG00000027035.10	Cers6	14734	3.20763	0.323358	9.91973	3.41667e-23	2.6625e-21	3442.33	2273.92	3169.68	15682.1	9397.66	16510.1	34456.6	16922	30752.1
ENSMUSG00000090570.1	RP23-115A1.10	271.779	4.88303	0.492356	9.91768	3.48755e-23	2.70673e-21	14.0381	6.84227	15.9839	500.035	283.203	466.733	576.778	177.823	404.578
ENSMUSG00000047511.6	Olfr1396	86.21	4.70738	0.477242	9.86371	5.97963e-23	4.62216e-21	4.01087	11.4038	5.55963	81.1624	126.6	68.2073	136.687	156.654	185.606
ENSMUSG00000112843.1	RP23-325K4.10	330.077	2.00373	0.203345	9.85384	6.59756e-23	5.07933e-21	88.2392	111.757	88.9541	546.68	493.227	504.734	442.162	326.856	368.083
ENSMUSG00000040213.13	Ccbl2	364.165	2.00149	0.203198	9.84998	6.85547e-23	5.25677e-21	151.41	141.407	144.55	358.234	336.624	388.781	637.873	460.647	657.961
ENSMUSG00000032724.5	Abtb2	279.842	5.62915	0.571771	9.84512	7.19499e-23	5.49514e-21	22.0598	9.12303	9.72935	225.762	102.451	81.8487	1209.47	446.251	411.878
ENSMUSG00000116639.1	RP23-78C2.6	703.174	2.77717	0.282185	9.84169	7.44482e-23	5.66338e-21	135.367	248.603	135.516	982.345	664.466	669.406	1285.07	1102.5	1105.29
ENSMUSG00000017756.9	Slc12a7	7149.98	1.35255	0.137748	9.81898	9.32813e-23	7.068e-21	3163.58	3594.47	3239.18	10372.9	8515.12	9956.31	8121.49	9118.94	8267.79
ENSMUSG00000094127.1	G530012D18Rik	513.692	3.03633	0.309287	9.81718	9.49675e-23	7.16743e-21	108.294	79.8265	183.468	341.442	355.65	441.398	1076.93	812.059	1224.16
ENSMUSG00000024338.14	Psmb8	6854.04	2.06256	0.210314	9.80704	1.05002e-22	7.89369e-21	3110.43	3437.1	2050.11	5896.87	6062.89	5258.78	12745	11704.2	11421
ENSMUSG00000023032.12	Slc4a8	88.2553	3.93685	0.401488	9.80564	1.0647e-22	7.97278e-21	8.02174	13.6845	13.8991	60.6386	65.8612	91.5926	203.995	127.017	209.588
ENSMUSG00000019487.11	Trip10	2021.98	1.7888	0.182553	9.79882	1.13909e-22	8.49663e-21	904.452	953.357	992.394	2096.23	1549.2	1851.34	3776.5	2791.82	3282.51
ENSMUSG00000032487.8	Ptgs2	4438.78	9.2864	0.94848	9.79081	1.23298e-22	9.16133e-21	27.0734	9.12303	25.7133	366.63	57.8115	115.952	26474.9	2481.06	10390.8
ENSMUSG00000029859.6	Epha1	142.459	4.36876	0.446434	9.7859	1.29435e-22	9.58015e-21	8.02174	20.5268	18.0688	123.143	66.593	111.08	402.813	188.831	343.058
ENSMUSG00000028645.11	Slc2a1	3359.93	2.27499	0.232825	9.77123	1.49617e-22	1.10314e-20	1341.64	1354.77	1281.49	2310.8	2300.02	2400.9	8433.18	4410.01	6406.52
ENSMUSG00000078153.3	Psme2b	2195.17	1.7468	0.178915	9.76325	1.61881e-22	1.18899e-20	1127.05	1083.36	872.862	2371.44	1987.54	1981.91	3905.94	3022.99	3403.46
ENSMUSG00000024833.14	Pola2	1446.59	1.51559	0.155426	9.75118	1.82333e-22	1.33409e-20	688.867	859.846	699.818	1420.81	1588.72	1364.15	2322.65	2083.92	1990.57
ENSMUSG00000025076.9	Casp7	1065.33	1.75533	0.180256	9.73798	2.07642e-22	1.5135e-20	524.421	558.786	430.871	1059.78	885.467	1040.65	1872.2	1459.84	1755.95
ENSMUSG00000019842.6	Traf3ip2	515.934	1.35245	0.138956	9.73295	2.18165e-22	1.58417e-20	193.525	223.514	200.147	835.88	834.973	795.102	529.145	509.76	521.364
ENSMUSG00000023067.13	Cdkn1a	14373.1	3.66473	0.376578	9.73165	2.20984e-22	1.59859e-20	2375.44	2928.49	2479.6	9211.47	6337.31	7335.2	46962.4	14032.8	37695.7
ENSMUSG00000030275.6	Etnk1	11037.1	1.5777	0.162591	9.70351	2.913e-22	2.09933e-20	4418.98	5649.44	5049.53	11986.9	15015.6	12111.7	14487.8	16130.3	14483.5
ENSMUSG00000049657.9	Zbtb5	2511.86	2.00126	0.206335	9.69909	3.04199e-22	2.18408e-20	709.924	679.666	680.36	4730.74	3608.46	3907.3	3284.63	2115.25	2890.44
ENSMUSG00000039031.16	Arhgap18	6024.87	-1.82993	0.188699	-9.69765	3.08519e-22	2.20683e-20	9510.78	8746.71	7488.13	7391.38	7238.14	6609.28	2365.1	2912.91	1961.37
ENSMUSG00000034297.14	Med13	6534.41	1.3471	0.139358	9.6665	4.18429e-22	2.98189e-20	3762.2	3947.99	4390.72	5683.24	5165.71	5063.9	11321.2	9274.75	10200
ENSMUSG00000012519.14	Mlkl	3251.25	3.07783	0.31847	9.66441	4.27059e-22	3.03212e-20	610.655	1142.66	478.128	2952.63	3058.15	2268.38	7490.87	5716.59	5543.14
ENSMUSG00000022790.14	Igsf11	289.221	4.60302	0.477474	9.64035	5.40053e-22	3.82023e-20	5.01359	43.3344	24.3234	295.73	291.253	294.266	413.168	733.309	502.595
ENSMUSG00000046157.13	Tmem229b	5131.84	1.63646	0.169915	9.63104	5.91275e-22	4.16719e-20	2843.71	2547.61	2692.95	4191.53	3692.62	5073.65	7602.7	8173.94	9367.87
ENSMUSG00000039753.16	Fbxl5	8251.77	2.53831	0.263829	9.62103	6.51768e-22	4.5767e-20	1973.35	1922.68	2043.86	11216.3	10913.9	11683.9	15792.5	7189.98	11529.4
ENSMUSG00000022885.16	St6gal1	5296.91	-2.81698	0.293553	-9.59614	8.29982e-22	5.80684e-20	9916.88	5941.37	11077.6	6379.18	3813.36	6720.36	1122.49	1323.51	1377.44
ENSMUSG00000008845.9	Cd163	554.18	-2.54715	0.265748	-9.58481	9.26265e-22	6.45691e-20	1055.86	757.212	1143.89	649.3	386.386	487.195	181.214	138.871	187.691
ENSMUSG00000024014.7	Pim1	8939.52	3.32202	0.34715	9.56942	1.07508e-21	7.46712e-20	2049.56	1443.72	1560.17	10574.4	5481.84	8788.99	21300.4	9428.01	19828.5
ENSMUSG00000045414.7	RP23-253N17.1	1591.39	-1.49741	0.156498	-9.56827	1.0871e-21	7.52334e-20	2341.35	2280.76	2449.02	1445.06	1748.98	1553.18	843.94	940.769	719.482
ENSMUSG00000059970.7	Hspa2	1030.91	2.2776	0.238289	9.55816	1.1987e-21	8.26586e-20	435.18	234.918	346.782	1288.34	956.45	1042.6	1776.93	1599.56	1597.46
ENSMUSG00000029104.15	Htt	8869.36	1.68737	0.176544	9.55777	1.2032e-21	8.26712e-20	3386.18	4889.95	4217.67	9523.99	9101.28	8496.68	14731.1	12083.5	13393.8
ENSMUSG00000055013.15	Agap1	1133.15	-1.61856	0.169395	-9.55491	1.23696e-21	8.46879e-20	1396.79	1477.93	1532.37	1550.48	1437.24	1369.99	401.777	569.881	461.929
ENSMUSG00000031792.15	Usb1	2792.11	1.67438	0.175269	9.55315	1.25815e-21	8.58317e-20	1293.51	1352.49	1093.16	3133.62	3462.1	2881.27	4050.91	4511.63	3350.29
ENSMUSG00000041633.14	Kctd12b	782.972	-2.32569	0.243542	-9.54943	1.30409e-21	8.86502e-20	1400.8	1352.49	1687.35	475.78	562.015	682.073	211.244	318.388	356.613
ENSMUSG00000047098.18	Rnf31	3241.41	1.50633	0.157999	9.53375	1.51702e-21	1.02761e-19	1279.47	1758.46	1430.91	4006.81	3769.45	4269.77	4043.66	4428.64	4185.51
ENSMUSG00000023249.15	Parp3	3051.57	1.84445	0.193476	9.53323	1.52464e-21	1.02913e-19	1242.37	1833.73	1273.85	2241.76	2802.76	2497.36	5006.68	5291.51	5274.12
ENSMUSG00000045658.16	Pid1	5604.38	-1.77863	0.186989	-9.51197	1.8708e-21	1.25836e-19	9560.92	6746.48	7943.32	7311.15	5487.7	6318.92	2316.43	2232.1	2522.36
ENSMUSG00000039531.8	Zufsp	3223.96	1.84937	0.194852	9.49113	2.28553e-21	1.52661e-19	1175.19	1388.98	1195.32	3691.49	4156.57	3879.04	5429.17	3487.87	4611.99
ENSMUSG00000097365.7	RP23-423L24.1	641.115	-1.98228	0.208853	-9.4913	2.28168e-21	1.52661e-19	945.563	880.373	1156.4	805.094	542.257	684.021	230.918	257.42	267.981
ENSMUSG00000028233.6	Tgs1	5095.02	1.6285	0.171671	9.48612	2.39795e-21	1.59613e-19	2754.47	2077.77	2668.62	5116.03	5136.44	4874.87	8749.01	6665.83	7812.12
ENSMUSG00000031639.12	Tlr3	3431.79	2.62373	0.276641	9.48422	2.44209e-21	1.61989e-19	693.881	944.234	649.087	4111.3	6398.78	4031.05	4883.46	5693.73	3480.63
ENSMUSG00000057143.15	Trim12c	3258.58	1.69951	0.179334	9.47675	2.62323e-21	1.73405e-19	1399.79	1708.29	1369.75	3335.12	3436.49	3561.39	5623.85	3951.06	4941.49
ENSMUSG00000023905.14	Tnfrsf12a	487.998	2.07644	0.219442	9.46239	3.00976e-21	1.98272e-19	244.663	196.145	161.924	447.793	416.389	387.807	946.455	898.43	692.371
ENSMUSG00000097819.1	RP24-421H8.1	243.879	2.91849	0.308653	9.45555	3.21319e-21	2.10948e-19	50.1359	54.7382	32.6628	407.678	296.375	342.985	447.34	275.203	287.793
ENSMUSG00000036381.13	P2ry14	2507.22	2.00197	0.211986	9.44388	3.59221e-21	2.35026e-19	769.085	1030.9	815.876	2442.34	3549.19	3510.73	3137.59	3894.33	3414.93
ENSMUSG00000078606.8	RP23-454A11.1	489.117	3.41147	0.36132	9.44169	3.66822e-21	2.39183e-19	92.2501	123.161	43.7821	584.929	394.435	477.451	1001.34	650.325	1034.39
ENSMUSG00000085505.1	RP23-344D2.4	236.337	2.33978	0.248123	9.42993	4.10346e-21	2.66655e-19	84.2283	100.353	89.649	165.124	147.09	162.723	577.814	341.251	458.8
ENSMUSG00000042350.13	Arel1	5828.97	1.29227	0.137418	9.40388	5.25855e-21	3.40562e-19	3412.25	3035.69	3841.7	5840.9	5266.7	5829.77	8314.1	8082.49	8837.12
ENSMUSG00000024019.17	Cmtr1	7083.43	1.10877	0.118007	9.39583	5.67678e-21	3.6641e-19	4180.33	4905.91	4340.68	7204.8	7145.2	7043.86	10146.9	9063.9	9719.27
ENSMUSG00000039116.6	Adgrg6	1020.46	2.32993	0.248082	9.39176	5.9005e-21	3.79572e-19	253.688	460.713	309.254	831.215	1162.08	1070.85	1674.42	1564.84	1857.1
ENSMUSG00000027765.6	P2ry1	644.665	-2.06887	0.22047	-9.38394	6.35499e-21	4.07442e-19	787.134	932.83	1015.33	623.178	987.186	804.846	210.208	237.944	203.332
ENSMUSG00000063193.8	Cd300lb	6060.86	-3.2618	0.347894	-9.37584	6.86257e-21	4.38518e-19	15938.2	14371.1	15748.3	1215.57	1257.22	1217.01	989.946	2711.38	1099.04
ENSMUSG00000026893.4	Gca	478.461	3.16151	0.337481	9.36798	7.3932e-21	4.70856e-19	132.359	127.722	92.4289	276.139	306.62	233.853	1509.77	601.212	1026.04
ENSMUSG00000022377.16	Asap1	4941.53	-1.18358	0.126406	-9.36329	7.72909e-21	4.90618e-19	6545.74	6071.38	6372.03	6311.08	5355.98	5454.63	2984.34	2662.27	2716.31
ENSMUSG00000044786.6	Zfp36	19138.3	3.53887	0.37812	9.35912	8.04056e-21	5.08705e-19	3876.51	2775.68	3156.48	20091.9	11904	16415.5	45098.5	17124.4	51801.7
ENSMUSG00000092190.1	RP24-258P4.8	392.776	2.3576	0.252445	9.33908	9.71707e-21	6.12751e-19	162.44	141.407	131.346	319.052	279.544	269.906	972.343	543.631	715.311
ENSMUSG00000090231.10	Cfb	1755.25	4.69896	0.503682	9.32921	1.0666e-20	6.70382e-19	284.772	136.845	93.8188	957.157	489.568	431.655	7531.25	2565.73	3306.49
ENSMUSG00000047712.8	Ust	383.149	2.70466	0.290103	9.32312	1.12972e-20	7.07738e-19	127.345	70.7035	148.72	249.085	204.17	334.216	736.247	855.245	722.61
ENSMUSG00000034135.15	Sik3	3933.38	1.995	0.214145	9.31611	1.20686e-20	7.53598e-19	1801.88	1334.24	1896.53	3999.35	2965.22	3306.1	7977.56	6150.99	5968.58
ENSMUSG00000045231.5	RP24-69M4.4	111.513	-3.70368	0.398382	-9.29682	1.44714e-20	9.00704e-19	309.84	141.407	242.539	108.217	67.3247	80.8743	11.3906	21.1694	20.8546
ENSMUSG00000019916.14	P4ha1	4701.43	1.23991	0.133381	9.29599	1.4584e-20	9.04773e-19	2641.16	2330.93	2900.74	5281.16	5124.73	5408.84	6477.11	6410.1	5738.13
ENSMUSG00000053040.13	Aph1c	2053.95	-2.59302	0.279154	-9.28887	1.55938e-20	9.64299e-19	4232.47	2517.96	4622.83	1798.63	1274.78	2152.43	571.601	640.163	674.645
ENSMUSG00000008734.9	Gprc5b	244.834	-1.73174	0.186496	-9.28567	1.60687e-20	9.9047e-19	424.15	490.363	388.479	161.392	190.997	158.825	125.297	138.871	125.127
ENSMUSG00000027360.5	Hdc	184.678	3.88543	0.418945	9.27432	1.78762e-20	1.09835e-18	41.1114	31.9306	10.4243	143.667	143.431	98.4133	480.476	367.501	345.143
ENSMUSG00000041836.10	Ptpre	1439.36	-1.69136	0.182789	-9.25309	2.18085e-20	1.33568e-18	2875.8	2449.53	3291.3	597.057	496.154	573.915	756.957	950.084	963.481
ENSMUSG00000035352.3	Ccl12	2575.36	5.34864	0.578717	9.24223	2.41413e-20	1.47385e-18	81.2202	228.076	21.5436	2841.62	4237.07	2554.85	5100.92	4337.19	3775.72
ENSMUSG00000092511.7	RP24-317H19.10	1718.27	4.65316	0.503488	9.24186	2.42257e-20	1.4743e-18	288.783	134.565	95.9036	944.096	491.032	425.808	7350.04	2499.69	3234.54
ENSMUSG00000046908.5	Ltb4r1	164.324	3.87548	0.419589	9.23639	2.54955e-20	1.54667e-18	25.0679	13.6845	16.6789	156.727	272.226	161.749	207.102	409.84	215.845
ENSMUSG00000002797.9	Ggct	508.97	4.05927	0.439713	9.23164	2.66515e-20	1.6117e-18	90.2446	41.0536	54.2064	543.882	307.352	411.192	1654.74	525.002	953.053
ENSMUSG00000027952.16	Pmvk	2775.47	2.53525	0.274731	9.2281	2.75463e-20	1.66057e-18	710.927	1051.43	713.718	3058.98	2093.65	3037.17	5688.05	3384.57	5240.75
ENSMUSG00000029319.8	Coq2	1019.25	1.67394	0.181423	9.22675	2.78957e-20	1.67637e-18	420.139	597.559	442.686	916.109	1144.52	1031.88	1551.19	1512.34	1556.79
ENSMUSG00000025491.14	Ifitm1	743.85	3.98411	0.4327	9.20754	3.33697e-20	1.99905e-18	74.2011	29.6499	133.431	903.982	754.476	937.363	1823.53	876.414	1161.6
ENSMUSG00000063800.5	Prpf38a	2187.97	1.96188	0.213286	9.19835	3.63479e-20	2.17068e-18	933.53	1044.59	724.142	1926.44	2567.85	1999.45	3606.68	3939.21	2949.88
ENSMUSG00000092550.2	RP23-123G8.16	2854.07	2.11949	0.230652	9.18911	3.96091e-20	2.35809e-18	1215.29	1487.05	820.045	2407.82	2353.44	2144.63	5737.75	4575.98	4944.62
ENSMUSG00000030737.17	Slco2b1	1656.21	-3.57944	0.389807	-9.1826	4.20822e-20	2.49757e-18	3803.31	1794.96	4180.15	1811.69	815.947	1681.8	256.806	350.566	210.631
ENSMUSG00000027950.7	Chrnb2	2115.54	1.4324	0.156042	9.17958	4.32793e-20	2.56069e-18	983.666	1238.45	1014.63	2615.86	2119.27	2361.92	3012.29	2737.63	2956.13
ENSMUSG00000027296.7	Itpka	64.4808	4.9161	0.536001	9.1718	4.65164e-20	2.74375e-18	4.01087	4.56152	4.16972	58.7728	48.2982	80.8743	149.113	89.7584	140.768
ENSMUSG00000049872.8	Fam26e	127.454	6.0087	0.655387	9.16817	4.81108e-20	2.82909e-18	3.00815	0	3.47477	234.158	137.577	248.469	243.345	105	172.05
ENSMUSG00000038256.15	Bcl9	1615.88	1.65859	0.180953	9.16585	4.91593e-20	2.88191e-18	846.294	741.246	1018.8	1315.39	1075.73	1285.22	2869.39	2437.87	2953.01
ENSMUSG00000038332.13	Sesn1	7184.45	-1.89262	0.20656	-9.1626	5.06628e-20	2.961e-18	15256.4	9882.52	12840.7	5227.98	4999.59	6221.48	3143.8	3184.73	3902.93
ENSMUSG00000020089.8	Ppa1	1508.48	3.35355	0.366373	9.15336	5.51887e-20	3.21571e-18	252.685	426.502	161.924	1309.79	1902.66	1007.52	3016.44	3300.74	2198.07
ENSMUSG00000115902.1	RP23-373B5.4	893.046	1.91352	0.209083	9.152	5.58912e-20	3.24677e-18	350.951	326.148	268.252	1404.95	950.596	1184.86	1212.58	1053.39	1285.68
ENSMUSG00000024985.18	Tcf7l2	402.524	1.67	0.182724	9.13942	6.27877e-20	3.63638e-18	254.69	228.076	251.573	192.178	157.335	190.006	841.869	661.333	845.652
ENSMUSG00000034858.16	Fam214a	786.052	-3.15982	0.34575	-9.13903	6.30131e-20	3.63844e-18	1793.86	1049.15	2189.8	475.78	536.403	465.758	107.693	205.767	250.255
ENSMUSG00000020823.16	Sec14l1	5212.68	-2.07652	0.228133	-9.10222	8.85054e-20	5.09504e-18	9455.63	8379.5	12287.5	2843.48	3358.19	3447.39	1815.25	2852.79	2474.39
ENSMUSG00000054008.8	Ndst1	3938.15	-1.77077	0.194562	-9.10131	8.92466e-20	5.12233e-18	6365.25	5177.32	6700.74	4657.04	3245.49	3948.23	1989.21	1611.42	1748.65
ENSMUSG00000032826.17	Ank2	162.438	3.29346	0.361923	9.0999	9.0416e-20	5.17395e-18	32.087	22.8076	62.5458	45.7122	32.1988	56.5146	424.559	345.485	440.031
ENSMUSG00000054720.12	Lrrc8c	3328.21	2.53208	0.278609	9.08828	1.0062e-19	5.74074e-18	1050.85	1147.22	1471.22	1670.83	1471.63	1902.98	9006.85	4447.27	7785.01
ENSMUSG00000045795.10	Whamm	913.769	1.38187	0.152108	9.08484	1.0385e-19	5.90745e-18	503.364	447.029	502.452	984.211	886.199	1098.14	1321.31	1160.08	1321.14
ENSMUSG00000044701.5	Il27	470.72	3.68961	0.406167	9.08397	1.04687e-19	5.93742e-18	69.1875	84.388	113.972	190.312	121.477	188.057	1717.91	547.865	1203.31
ENSMUSG00000034610.14	Zcchc11	1316.56	-1.07617	0.118498	-9.08175	1.06846e-19	6.04202e-18	1850.01	2011.63	2067.49	1047.65	1058.17	1001.67	910.212	904.358	997.891
ENSMUSG00000038102.15	Trappc11	4416.41	1.05146	0.115792	9.08061	1.07964e-19	6.08725e-18	2383.46	2403.92	2722.83	5496.66	5533.8	5625.15	4874.14	5294.9	5412.8
ENSMUSG00000108219.1	RP24-266P6.3	110.016	2.51622	0.277337	9.07278	1.16019e-19	6.52225e-18	27.0734	54.7382	48.6468	43.8464	46.8346	40.9244	224.705	248.952	254.426
ENSMUSG00000001156.9	Mxd1	4206.25	3.1268	0.344669	9.07189	1.16971e-19	6.55655e-18	1338.63	891.776	1181.42	1829.42	1393.33	1389.48	14594.5	5239.01	9998.72
ENSMUSG00000038668.14	Lpar1	276.745	4.56498	0.503754	9.06193	1.2816e-19	7.16273e-18	37.1006	22.8076	27.1032	122.21	73.1791	122.773	1212.58	265.041	607.91
ENSMUSG00000050919.9	Zfp366	118.32	3.64781	0.403108	9.04919	1.44031e-19	8.02635e-18	10.0272	4.56152	7.64449	258.414	211.488	273.803	96.3023	79.597	123.042
ENSMUSG00000074743.4	Thbd	322.115	-2.97201	0.329054	-9.03199	1.68577e-19	9.367e-18	748.028	492.644	749.855	226.695	196.852	231.905	55.9175	130.404	66.7346
ENSMUSG00000024975.12	Pdcd4	463.038	-2.69821	0.29901	-9.02381	1.81664e-19	1.0065e-17	741.009	661.42	1100.81	353.57	387.117	536.889	92.1603	133.791	160.58
ENSMUSG00000052512.17	Nav2	2088.18	-3.51056	0.389102	-9.02223	1.84302e-19	1.01817e-17	2641.16	4173.79	2633.87	3091.64	3508.94	1916.62	201.924	450.485	175.178
ENSMUSG00000061132.13	Blnk	2977.79	-1.59921	0.178002	-8.98421	2.60591e-19	1.4355e-17	4234.48	4180.63	4755.57	3094.43	3347.21	2841.32	1297.49	1770.61	1278.38
ENSMUSG00000050549.8	RP23-173N16.6	1915.52	2.94141	0.32802	8.96716	3.04249e-19	1.67119e-17	465.261	428.783	287.016	2538.43	2285.38	2180.68	4592.48	1934.04	2527.57
ENSMUSG00000032238.17	Rora	652.267	-1.82385	0.203405	-8.96661	3.05776e-19	1.67478e-17	1132.07	937.392	1138.33	692.213	458.833	603.147	315.83	273.509	319.075
ENSMUSG00000037242.8	Clic4	22512	2.46488	0.27524	8.95538	3.38578e-19	1.84916e-17	7651.74	9282.69	6054.44	19882.9	18021.8	14830.2	58405.8	31257.9	37220.2
ENSMUSG00000067206.3	Lrrc66	72.3156	3.89942	0.435496	8.95397	3.42913e-19	1.86751e-17	9.02446	18.2461	4.86468	55.0412	92.2056	66.2585	134.616	132.944	137.64
ENSMUSG00000055447.19	Cd47	12844.2	0.957602	0.107093	8.94178	3.82951e-19	2.07965e-17	8528.12	7964.41	8721.67	12892.7	14268.5	14236.8	15943.7	16953.3	16088.3
ENSMUSG00000056592.14	Zfp658	180.645	-3.00776	0.33666	-8.93411	4.10481e-19	2.22286e-17	373.011	266.849	558.048	93.2902	68.0565	116.927	43.4914	55.0405	51.0937
ENSMUSG00000022246.14	Rai14	2455.75	2.03583	0.227909	8.93265	4.15933e-19	2.24604e-17	717.946	1117.57	666.461	3463.86	2868.62	3060.56	3813.78	3334.61	3058.32
ENSMUSG00000066677.12	Ifi208	1293.38	3.73965	0.418907	8.92717	4.3706e-19	2.35349e-17	227.617	212.11	65.3257	1642.84	1738.73	1061.11	2522.5	2531.02	1639.17
ENSMUSG00000038507.6	Parp12	10372.4	2.23665	0.250993	8.9112	5.04823e-19	2.71077e-17	3398.21	5200.13	2642.21	10041.8	10196	8956.59	19834.1	16493.5	16588.8
ENSMUSG00000021366.8	Hivep1	3987.48	2.39211	0.268578	8.90658	5.26305e-19	2.81823e-17	1595.32	1402.67	1506.66	3270.75	1888.02	2568.49	10222.5	5765.7	7667.18
ENSMUSG00000105875.1	RP24-492O4.5	114.307	2.36924	0.266236	8.89902	5.63418e-19	3.00856e-17	40.1087	31.9306	38.9174	105.418	128.063	99.3877	223.67	200.686	160.58
ENSMUSG00000012428.9	Steap4	185.86	6.90921	0.776875	8.89359	5.91647e-19	3.15052e-17	1.00272	2.28076	4.16972	242.554	296.375	167.595	278.552	584.276	95.931
ENSMUSG00000020134.13	Peli1	3181.07	1.89688	0.213324	8.892	6.00173e-19	3.18707e-17	1622.4	1147.22	1465.66	2962.9	3064.74	2565.57	6523.7	4396.47	4881.01
ENSMUSG00000029405.16	G3bp2	11370.7	0.904042	0.101696	8.88967	6.12923e-19	3.23684e-17	7964.59	8130.9	7200.42	11888	12048.2	11530.9	14799.5	14324.9	14449.1
ENSMUSG00000038301.15	Snx10	8881.89	2.01104	0.226216	8.8899	6.11646e-19	3.23684e-17	4063.01	3603.6	3319.1	8944.66	7599.65	8126.41	19558.7	11238.4	13483.5
ENSMUSG00000097062.1	Gm17586	197.865	-1.68331	0.189396	-8.88779	6.2334e-19	3.28281e-17	358.973	312.464	344.697	166.989	138.308	141.286	119.083	99.9197	99.0592
ENSMUSG00000031824.15	AC163442.1	1561.11	-1.49157	0.16786	-8.8858	6.34599e-19	3.33295e-17	2934.96	2520.24	2782.59	1046.72	974.013	859.411	867.756	920.447	1143.87
ENSMUSG00000093661.1	Eif4e3	1829.52	1.61411	0.181676	8.88458	6.41616e-19	3.3606e-17	1047.84	923.707	883.981	1771.58	1501.63	1592.15	3362.3	2361.66	3020.78
ENSMUSG00000051065.9	Mb21d2	180.222	4.36196	0.491283	8.8787	6.76481e-19	3.53355e-17	27.0734	6.84227	13.8991	247.219	106.11	186.108	475.298	204.92	354.528
ENSMUSG00000030341.17	Tnfrsf1a	19964	2.2797	0.256891	8.87418	7.04506e-19	3.66994e-17	5951.13	5409.96	6513.11	27211.8	17530.8	30250.9	34026.8	21592.8	31189
ENSMUSG00000027466.15	Rbck1	3974.95	1.19589	0.134857	8.86785	7.45697e-19	3.87399e-17	2578.99	2659.36	2308.64	3679.36	3841.9	3435.7	5510.98	6377.08	5382.56
ENSMUSG00000086291.1	AC104889.1	109.172	-5.15323	0.581712	-8.85872	8.09371e-19	4.19342e-17	297.807	91.2303	462.839	46.6451	24.8809	35.078	6.21305	8.46777	9.38455
ENSMUSG00000105813.1	RP24-277J22.4	72.2754	7.09679	0.801235	8.85731	8.19657e-19	4.23527e-17	4.01087	0	0	27.987	21.9537	17.539	256.806	166.815	155.366
ENSMUSG00000027514.14	Zbp1	8590.22	4.0059	0.452391	8.85495	8.37213e-19	4.31435e-17	948.571	2041.28	393.344	6999.56	7079.34	5631	20953.5	16788.2	16477.2
ENSMUSG00000069844.12	Sco1	644.053	1.62167	0.18385	8.8206	1.13848e-18	5.85111e-17	361.981	348.956	287.016	593.325	640.317	506.683	1117.31	1048.31	892.575
ENSMUSG00000044162.12	Tnip3	7829.65	3.64679	0.414059	8.80742	1.28058e-18	6.56384e-17	1631.42	1409.51	747.075	7323.28	6922.01	5014.21	25907.4	8405.95	13106
ENSMUSG00000038587.9	Akap12	294.67	2.93462	0.333453	8.80069	1.35975e-18	6.95103e-17	39.106	72.9843	43.0871	472.981	519.571	363.447	328.256	525.848	286.75
ENSMUSG00000098374.1	RP24-271E12.5	6781.53	1.04453	0.118796	8.79263	1.46094e-18	7.44845e-17	4168.3	4858.01	4244.08	6790.59	6923.47	6702.82	9608.49	8560.92	9177.05
ENSMUSG00000002489.16	Tiam1	2315.33	1.7978	0.204477	8.79218	1.46686e-18	7.45879e-17	611.658	939.672	749.16	4121.56	3366.24	3083.94	2765.84	2749.48	2450.41
ENSMUSG00000036167.16	Pphln1	3069.16	1.77275	0.201724	8.788	1.52245e-18	7.7006e-17	1656.49	1644.43	1420.49	2488.98	2215.86	2071.55	6633.47	4198.32	5292.89
ENSMUSG00000040433.16	Zbtb38	1732.63	-1.90471	0.216738	-8.78808	1.52137e-18	7.7006e-17	3398.21	2360.58	3254.47	1650.3	1140.86	1379.74	708.288	817.987	883.191
ENSMUSG00000019082.18	Slc25a22	1659.37	1.75777	0.200051	8.78662	1.54124e-18	7.7563e-17	705.913	848.442	760.279	1566.34	1841.92	1400.2	2271.91	3193.2	2346.14
ENSMUSG00000066026.14	Dhrs3	11429.8	-2.53091	0.288042	-8.7866	1.54155e-18	7.7563e-17	21461.2	15762.3	27459.7	8996.9	6344.63	11649.8	3071.32	3757.15	4364.86
ENSMUSG00000106019.1	RP24-487F9.4	72.2048	-2.6917	0.306933	-8.76968	1.79182e-18	8.99192e-17	140.381	123.161	172.349	51.3096	40.2485	54.5658	18.6392	26.2501	22.94
ENSMUSG00000027087.11	Itgav	18509.2	1.91553	0.218647	8.7608	1.93865e-18	9.70335e-17	4803.02	8096.69	7324.81	20234.6	24892.6	24959	23854	25597.2	26821
ENSMUSG00000020128.15	Vps54	3603.5	1.38063	0.157716	8.75392	2.06076e-18	1.02877e-16	2022.48	1913.56	2117.52	3559.95	3598.95	3443.49	6198.55	4467.6	5109.37
ENSMUSG00000002289.15	Angptl4	79.0182	-5.27926	0.603607	-8.74619	2.20679e-18	1.09881e-16	350.951	125.442	183.468	17.7251	8.0497	8.7695	7.24856	8.46777	1.04273
ENSMUSG00000025279.7	Dnase1l3	172.951	5.23708	0.600172	8.72597	2.63918e-18	1.3107e-16	19.0516	9.12303	7.64449	86.7599	27.0763	41.8987	732.105	193.912	438.988
ENSMUSG00000026596.13	Abl2	7332.58	1.61299	0.185301	8.7047	3.1842e-18	1.57729e-16	2792.57	3067.62	2720.74	11600.6	9682.32	9892.98	10009.2	6852.97	9374.12
ENSMUSG00000045664.4	Cdc42ep2	1899.05	4.78418	0.549651	8.70405	3.20257e-18	1.5823e-16	229.622	57.019	132.736	2294.01	1012.07	1720.77	6310.39	1476.78	3858.09
ENSMUSG00000035891.16	Cerk	10598.9	-1.59132	0.182834	-8.70361	3.215e-18	1.58436e-16	18955.4	13773.5	18222.4	10281.5	7973.59	9271.32	5124.73	5841.07	5946.68
ENSMUSG00000038807.18	Rap1gap2	167.852	1.82641	0.209977	8.69812	3.37419e-18	1.65854e-16	94.2555	86.6688	75.055	127.808	105.378	118.876	323.079	266.735	312.818
ENSMUSG00000090125.3	Pou3f1	143.253	5.15896	0.593325	8.69499	3.46851e-18	1.70055e-16	8.02174	18.2461	2.77982	135.271	163.189	72.1048	272.339	450.485	166.836
ENSMUSG00000051339.10	AC162528.2	1004.38	-2.64765	0.304883	-8.68417	3.81519e-18	1.86574e-16	1505.08	1972.86	2369.1	620.38	845.218	794.127	184.321	370.888	377.468
ENSMUSG00000029771.12	Irf5	11606.9	1.32764	0.152949	8.68024	3.94934e-18	1.92643e-16	7731.96	7503.69	7012.78	9876.63	8228.25	8270.62	21252.8	16834.8	17750.4
ENSMUSG00000062545.4	Tlr12	173.215	5.33414	0.61591	8.66059	4.69323e-18	2.28348e-16	20.0544	6.84227	7.64449	46.6451	7.31791	39.95	577.814	303.146	549.518
ENSMUSG00000041135.15	Ripk2	1500.4	2.55246	0.295072	8.65028	5.13716e-18	2.49315e-16	507.375	460.713	362.766	1613.92	1537.49	1222.86	3712.3	1722.34	2363.86
ENSMUSG00000035469.17	Rcbtb1	2608.69	1.12309	0.129947	8.64268	5.49103e-18	2.65816e-16	1548.2	1751.62	1626.89	2847.22	2615.42	2372.64	3757.86	3509.04	3449.34
ENSMUSG00000026012.2	Cd28	6203.28	-2.27291	0.26339	-8.62947	6.16359e-18	2.97622e-16	13657	7704.4	13696.1	5083.38	4001.43	4430.55	2869.39	1949.28	2437.9
ENSMUSG00000108524.1	RP23-136A14.3	1138.32	2.49176	0.289291	8.61334	7.0962e-18	3.41794e-16	196.533	198.426	276.592	2026.26	1513.34	2236.22	1674.42	873.874	1249.19
ENSMUSG00000000708.14	Kat2b	2606.77	1.11121	0.129323	8.59246	8.51232e-18	4.08975e-16	1754.76	1785.83	1713.76	2210.04	2552.49	2097.86	3959.79	3570.01	3816.38
ENSMUSG00000029822.15	Osbpl3	731.371	-1.52033	0.177195	-8.57996	9.49059e-18	4.54837e-16	1135.08	1019.5	1207.13	667.025	739.84	641.148	386.245	458.953	327.417
ENSMUSG00000024777.9	Ppp2r5b	1177.69	1.08416	0.126403	8.577	9.73799e-18	4.65529e-16	671.821	743.527	710.243	1360.17	1213.31	1403.12	1492.17	1452.22	1552.62
ENSMUSG00000082116.1	RP23-54N20.5	58.8726	5.65139	0.659098	8.57443	9.95802e-18	4.74864e-16	2.00544	4.56152	1.38991	69.9676	60.0068	70.156	112.87	79.597	129.298
ENSMUSG00000050394.14	Armcx6	332.515	4.23487	0.494346	8.56661	1.06578e-17	5.06974e-16	24.0652	59.2997	17.3738	320.918	528.353	253.341	595.417	865.406	328.459
ENSMUSG00000034265.8	Zdhhc14	2058	-3.57438	0.417865	-8.55391	1.18985e-17	5.64588e-16	3936.67	1601.09	3855.6	3610.33	1410.16	3318.77	297.191	198.146	294.049
ENSMUSG00000018909.15	Arrb1	6557.18	-1.85753	0.217373	-8.54537	1.28123e-17	6.06451e-16	9945.96	10122	12976.9	5501.32	4873.73	6474.82	2378.56	3104.28	3637.04
ENSMUSG00000019866.14	Aim1	4218.73	1.45392	0.170225	8.54113	1.32919e-17	6.27598e-16	2367.42	2887.44	2280.84	3546.89	3261.59	3007.94	7947.53	6322.88	6346.04
ENSMUSG00000009185.2	Ccl8	1060.36	4.97263	0.582609	8.5351	1.4004e-17	6.59598e-16	121.329	93.5111	18.7638	1059.78	542.989	433.603	3874.87	1652.91	1745.53
ENSMUSG00000079014.4	Serpina3i	199.996	10.2971	1.20979	8.51148	1.71729e-17	8.06876e-16	0	0	0.694954	86.7599	68.0565	79.8999	650.299	672.341	241.913
ENSMUSG00000038712.16	Fam63a	3020.22	-1.07099	0.126158	-8.48925	2.07969e-17	9.74761e-16	4266.56	3989.05	3920.93	3314.6	2775.68	3119.02	1822.5	1965.37	2008.29
ENSMUSG00000108332.1	RP23-89C10.2	192.359	2.70675	0.318994	8.48524	2.15265e-17	1.00649e-15	51.1386	15.9653	54.9013	260.28	213.683	283.547	315.83	275.203	260.682
ENSMUSG00000030269.14	Mtmr14	4929.1	1.8829	0.222502	8.46239	2.61943e-17	1.22176e-15	2606.06	2178.12	2296.13	4255.9	3143.77	3758.22	11134.8	6846.19	8142.66
ENSMUSG00000091144.2	Phf11d	205.802	2.40224	0.284092	8.45587	2.77016e-17	1.28893e-15	62.1685	79.8265	50.7316	258.414	220.269	189.032	426.63	265.888	299.263
ENSMUSG00000079659.5	Tmem243	1895.05	1.85222	0.219074	8.45478	2.79624e-17	1.29792e-15	890.414	816.511	788.773	1746.39	1786.3	2014.06	3837.6	2210.93	2964.48
ENSMUSG00000033088.19	Triobp	2323.55	1.20768	0.143326	8.42615	3.57225e-17	1.65411e-15	1630.42	1466.53	1339.18	2210.04	1886.56	2136.84	3554.9	3525.98	3161.55
ENSMUSG00000055994.15	Nod2	1337.67	3.18311	0.377806	8.42523	3.60039e-17	1.66167e-15	320.87	339.833	304.39	922.64	638.122	754.177	4446.47	1303.19	3009.31
ENSMUSG00000068015.8	Lrch1	2389.5	2.12795	0.252574	8.42505	3.60592e-17	1.66167e-15	988.68	814.231	1009.77	2493.65	1647.99	2238.17	5111.27	2962.03	4239.73
ENSMUSG00000052102.14	Gnpda1	2885.66	-1.1678	0.138675	-8.42112	3.72897e-17	1.71425e-15	4278.6	3660.62	4126.64	3040.33	2718.6	2773.11	1769.68	1970.45	1632.91
ENSMUSG00000104985.1	RP23-50I16.1	476.759	1.841	0.218906	8.41001	4.09984e-17	1.88024e-15	235.639	187.022	195.282	584.929	366.627	498.887	701.039	747.704	773.704
ENSMUSG00000032750.13	Gab3	277.299	-2.43271	0.28964	-8.39908	4.50009e-17	2.05397e-15	635.723	364.921	645.612	216.433	172.703	153.954	79.7342	106.694	119.914
ENSMUSG00000090081.1	RP23-202J6.2	137.119	7.41241	0.882497	8.39935	4.48941e-17	2.05397e-15	2.00544	2.28076	0.694954	223.896	82.6924	186.108	389.351	113.468	233.571
ENSMUSG00000017417.14	Plxdc1	1302.89	-1.54305	0.183768	-8.39673	4.59071e-17	2.09035e-15	2132.78	1644.43	1961.85	1424.54	1205.99	1385.58	664.797	754.478	551.603
ENSMUSG00000079197.10	Psme2	5378.93	1.74552	0.207947	8.39405	4.69676e-17	2.13358e-15	2791.57	3193.06	2041.77	4625.33	4378.3	4499.73	10246.4	7463.49	9170.79
ENSMUSG00000031583.13	Wrn	1905.92	1.37305	0.16367	8.38916	4.89624e-17	2.21893e-15	1141.09	1042.31	1327.36	1466.52	1549.2	1508.35	3329.16	2586.06	3203.26
ENSMUSG00000024789.12	Jak2	3861.88	1.82144	0.217248	8.38412	5.11063e-17	2.31063e-15	2049.56	1747.06	1642.18	3359.38	3759.94	2973.84	8274.75	5422.76	5527.5
ENSMUSG00000041075.8	Fzd7	7155.95	2.87065	0.34244	8.38293	5.16264e-17	2.32865e-15	1330.61	1037.74	1245.36	14823.8	7443.04	12075.6	12301.8	5209.37	8936.18
ENSMUSG00000025888.5	Casp1	6971.55	1.89966	0.226666	8.38087	5.25374e-17	2.36418e-15	2969.05	3608.16	2367.01	6165.55	7445.24	6848.01	13694.6	8907.25	10739.1
ENSMUSG00000097479.1	Gm26582	6106.61	0.900733	0.107694	8.36383	6.07151e-17	2.72578e-15	4222.45	4417.83	3854.91	6389.44	6539.28	6228.3	8052.12	7547.32	7707.85
ENSMUSG00000005370.3	Msh6	673.41	-1.83929	0.220209	-8.35246	6.68532e-17	2.99434e-15	931.525	1183.71	1183.51	515.895	710.569	614.84	239.203	344.638	336.801
ENSMUSG00000027951.16	Adar	9930.57	1.45247	0.174	8.3475	6.97202e-17	3.11547e-15	4491.17	6075.94	4306.63	12352.6	10764.6	10719.3	14182.3	13462.1	13020.5
ENSMUSG00000115338.2	Pnp	16769.3	2.43686	0.292432	8.3331	7.87554e-17	3.51103e-15	4485.16	7841.25	3494.92	16762.4	17669.8	15067	33421	27623.6	24558.3
ENSMUSG00000098399.1	Gm27995	167.565	1.83363	0.220083	8.33153	7.98015e-17	3.54941e-15	61.1658	70.7035	77.8348	170.721	175.63	200.724	261.984	215.081	274.237
ENSMUSG00000027173.7	Depdc7	319.882	-1.88168	0.225912	-8.32926	8.13488e-17	3.60985e-15	615.669	415.098	457.28	309.723	384.19	292.317	126.332	149.033	129.298
ENSMUSG00000104955.1	RP24-142B15.2	347.1	10.7597	1.29232	8.32587	8.37108e-17	3.70609e-15	0	0	0.694954	460.853	115.623	395.602	1098.67	232.864	819.584
ENSMUSG00000051285.17	Pcmtd1	3644.07	1.53647	0.184632	8.32183	8.66172e-17	3.82592e-15	2162.86	1858.82	1881.24	3328.59	2943.26	3490.26	6506.1	4509.93	6115.6
ENSMUSG00000026767.12	Fam188a	2103.95	1.63814	0.19696	8.31708	9.01547e-17	3.97302e-15	1113.02	1078.8	934.018	2186.72	2100.24	1800.67	4037.45	2781.66	2902.95
ENSMUSG00000021650.7	Ptcd2	1397.53	1.05812	0.12723	8.31658	9.05391e-17	3.98081e-15	893.422	900.899	765.144	1628.85	1595.3	1482.05	1808	1746.05	1758.04
ENSMUSG00000028128.13	F3	186.691	7.72728	0.929188	8.31616	9.08576e-17	3.98568e-15	2.00544	2.28076	0.694954	300.394	250.272	200.724	584.027	77.0567	262.767
ENSMUSG00000021892.14	Sh3bp5	2994.84	-1.97152	0.237089	-8.31553	9.13421e-17	3.99778e-15	6216.85	4180.63	4935.56	3158.8	1993.4	2556.8	1189.8	1202.42	1519.25
ENSMUSG00000067851.11	Arfgef1	6794.46	1.29632	0.156043	8.30745	9.77806e-17	4.26983e-15	4315.7	4438.36	4451.18	5526.51	4927.15	5058.06	12393	8975.84	11064.4
ENSMUSG00000021482.10	Aaed1	1450.89	-1.27011	0.152999	-8.30145	1.0285e-16	4.48098e-15	2084.65	1940.93	2084.86	1352.71	1431.38	1628.2	742.46	840.85	952.011
ENSMUSG00000024421.16	Lama3	321.827	-2.20612	0.265917	-8.2963	1.07408e-16	4.66898e-15	335.911	426.502	606	386.221	379.068	465.758	84.9117	110.928	101.145
ENSMUSG00000043059.16	Zfp513	1601.68	1.10245	0.13304	8.28657	1.16565e-16	5.05555e-15	1058.87	994.41	906.915	1849.01	1606.28	1648.67	2210.81	2011.94	2128.21
ENSMUSG00000060519.11	Tor3a	12589.5	1.78061	0.214949	8.28386	1.19243e-16	5.16001e-15	5742.57	5993.83	3736.07	15787.5	14488	14428.8	19976	17919.5	15233.2
ENSMUSG00000073492.2	Gm10521	780.802	-1.75665	0.212157	-8.27995	1.23226e-16	5.32035e-15	973.639	1174.59	1407.28	811.624	697.397	910.08	294.084	367.501	391.023
ENSMUSG00000044147.8	Arf6	7094.93	1.48676	0.179677	8.27463	1.28858e-16	5.55101e-15	4019.9	4801	3280.88	6019.08	6093.62	5758.64	12656	10158.8	11066.5
ENSMUSG00000005973.6	Rcn1	673.237	2.78817	0.337178	8.26913	1.34939e-16	5.79997e-15	182.495	319.306	111.193	391.819	514.449	375.14	1484.92	1374.32	1305.5
ENSMUSG00000066258.13	Trim12a	1694.11	1.11588	0.134964	8.26796	1.36272e-16	5.84414e-15	922.501	1117.57	923.594	1949.76	1861.68	2077.4	2213.92	2062.75	2117.78
ENSMUSG00000081769.9	RP23-303F24.3	50.8253	3.80122	0.460244	8.25915	1.46713e-16	6.27786e-15	12.0326	4.56152	3.47477	58.7728	43.9074	52.617	96.3023	80.4438	105.316
ENSMUSG00000046062.5	Ppp1r15b	8429.44	1.47765	0.179033	8.25351	1.53803e-16	6.56661e-15	3982.8	4940.12	4588.78	8044.41	8929.31	7762.96	14945.5	10539	12132.1
ENSMUSG00000037685.15	Atp8a1	8724.07	1.63972	0.198682	8.25298	1.54488e-16	6.58117e-15	4344.78	3783.78	4960.58	8436.23	7452.56	8727.61	15341.1	10538.1	14931.9
ENSMUSG00000036067.12	Slc2a6	11542.9	2.15089	0.260905	8.24397	1.66591e-16	7.08106e-15	5196.08	4949.24	5201.03	7333.54	5507.46	7539.83	28701.2	14563.7	24894.1
ENSMUSG00000037533.19	Rapgef6	11239.4	2.26298	0.274581	8.24159	1.69942e-16	7.2075e-15	3346.07	3094.99	3225.28	18542.4	11942.8	14600.3	20480.3	10116.4	15805.7
ENSMUSG00000018341.12	Il12rb2	1301.83	2.83759	0.344325	8.24103	1.70738e-16	7.22527e-15	300.815	602.12	316.899	397.416	884.735	550.53	2887	2905.29	2871.67
ENSMUSG00000007817.15	Zmiz1	9208.69	-1.3673	0.165954	-8.23906	1.73571e-16	7.32896e-15	14255.6	13369.8	16813.7	7992.17	7212.53	6006.14	5377.4	5933.37	5917.48
ENSMUSG00000054404.13	Slfn5	61280.7	2.85297	0.346452	8.23484	1.79802e-16	7.57539e-15	13258.9	19028.4	7139.26	93118.5	69463	64725.8	122333	78653.7	83806.1
ENSMUSG00000040264.10	Gbp2b	496.094	8.84487	1.07624	8.21831	2.06389e-16	8.67649e-15	8.02174	0	0.694954	63.4373	32.9306	50.6683	2982.27	592.744	734.081
ENSMUSG00000039782.14	Cpeb2	1070.97	-1.34573	0.16391	-8.21019	2.20838e-16	9.26361e-15	2063.59	1655.83	2106.4	562.54	478.591	475.502	697.933	789.196	809.157
ENSMUSG00000017057.9	Il13ra1	2782.45	2.04808	0.24955	8.20708	2.2663e-16	9.48579e-15	1384.75	839.319	1073.7	2604.66	2622.01	2852.04	5789.53	3459.08	4417
ENSMUSG00000019876.15	Pkib	2766.55	1.50612	0.183535	8.2062	2.28297e-16	9.53476e-15	1488.03	1560.04	1059.11	3253.03	2972.53	2928.04	4214.52	3665.7	3757.99
ENSMUSG00000028466.15	Creb3	4516.04	1.57563	0.192075	8.20321	2.34059e-16	9.75415e-15	2312.27	2570.41	2518.51	3412.55	3184.02	4590.35	7307.58	6401.63	8347.04
ENSMUSG00000021880.7	Rnase6	1575.24	2.55342	0.311417	8.19935	2.41691e-16	1.00504e-14	576.563	547.382	418.362	1037.39	998.163	1556.1	3363.33	1833.27	3846.62
ENSMUSG00000037752.4	Xkr8	625.191	1.98243	0.242086	8.18893	2.63553e-16	1.09357e-14	311.845	255.445	330.798	369.429	320.524	469.656	1424.86	904.358	1239.8
ENSMUSG00000109408.1	RP23-25M3.6	8735.93	2.17724	0.266293	8.17613	2.9311e-16	1.21359e-14	2624.11	4821.52	2635.26	9010.9	7062.51	6928.88	16728.6	13919.3	14892.2
ENSMUSG00000022389.15	Tef	2325.5	-1.48955	0.182284	-8.17159	3.04343e-16	1.25738e-14	3288.91	3229.55	4168.33	2222.17	1868.99	2343.41	1098.67	1318.43	1391
ENSMUSG00000026536.9	Mnda	5217.71	3.75944	0.460692	8.16043	3.33841e-16	1.37629e-14	667.81	1279.51	242.539	5133.76	5646.5	4435.42	12628	8289.95	8635.87
ENSMUSG00000029640.17	Usp12	4667.78	1.59678	0.195682	8.16007	3.34821e-16	1.37736e-14	2565.96	2118.82	1932.67	5754.14	4698.1	4922.62	8031.41	5802.96	6183.38
ENSMUSG00000071350.12	Setdb2	2189.65	2.05389	0.25176	8.15813	3.40259e-16	1.39674e-14	659.788	882.653	556.658	2820.16	3765.06	2341.46	3376.79	2658.88	2645.4
ENSMUSG00000072572.9	Slc39a2	50.2756	3.23917	0.397316	8.15263	3.561e-16	1.45864e-14	8.02174	9.12303	11.8142	40.1148	54.8843	47.7451	81.8052	113.468	85.5037
ENSMUSG00000029992.14	Gfpt1	2627.24	1.33613	0.1639	8.15207	3.57739e-16	1.46223e-14	1703.62	1655.83	1644.26	2235.23	1866.07	1904.93	4792.33	3525.98	4316.89
ENSMUSG00000059742.10	Kcnh7	106.458	3.43247	0.421437	8.1447	3.80224e-16	1.55083e-14	18.0489	29.6499	17.3738	56.907	90.7421	75.028	313.759	126.17	230.443
ENSMUSG00000107458.1	RP24-266P6.8	93.2673	2.45259	0.301795	8.12666	4.4128e-16	1.79604e-14	26.0707	57.019	34.7477	32.6516	41.7121	38.0012	202.96	182.057	224.187
ENSMUSG00000063317.7	Usp31	1801.07	1.34517	0.165882	8.10916	5.09706e-16	2.07014e-14	1114.02	1238.45	1125.13	1432	1286.49	1188.76	3355.05	2484.44	2985.33
ENSMUSG00000061458.9	Nol10	896.052	1.5202	0.187612	8.10289	5.36679e-16	2.17508e-14	451.223	483.521	359.986	981.413	1191.36	905.208	1321.31	1242.22	1128.23
ENSMUSG00000026806.15	Ddx31	1569.82	1.50636	0.185937	8.10145	5.4306e-16	2.1963e-14	605.642	688.789	601.135	2612.12	1847.77	2400.9	1939.51	1577.55	1855.01
ENSMUSG00000093507.1	RP24-201C14.11	81.7657	4.29519	0.530653	8.09416	5.76626e-16	2.32714e-14	2.00544	18.2461	6.25458	103.552	75.3744	100.362	184.321	91.4519	154.324
ENSMUSG00000037012.18	Hk1	9448.87	1.84298	0.227737	8.0926	5.84055e-16	2.35217e-14	3199.67	5115.74	4107.87	8655.46	9867.47	9554.86	11676.4	17606.2	15256.2
ENSMUSG00000037946.11	Fgd3	2426.55	-2.20989	0.273097	-8.09196	5.87146e-16	2.35966e-14	5107.85	5143.11	6458.9	489.773	432.488	595.352	765.241	1542.83	1303.41
ENSMUSG00000024581.12	Napg	3057.7	1.07402	0.132785	8.08842	6.04425e-16	2.42402e-14	1760.77	2121.1	1964.63	2904.12	3283.54	3193.07	4152.39	3838.44	4301.25
ENSMUSG00000085467.1	RP23-203A12.4	105.252	2.541	0.314688	8.07467	6.76581e-16	2.70774e-14	23.0625	29.6499	44.477	82.0953	89.2785	97.4389	172.93	168.509	239.827
ENSMUSG00000004864.12	Mapk13	38.4717	4.19312	0.519663	8.06891	7.09273e-16	2.83266e-14	7.01903	6.84227	2.08486	29.8529	20.4901	21.4366	98.3733	82.9841	77.1619
ENSMUSG00000031555.15	Adam9	20618.5	1.25689	0.156147	8.04941	8.31954e-16	3.31571e-14	9409.51	11292	12568.9	23785.3	22627	26370.9	27251.5	24642.9	27618.7
ENSMUSG00000075010.4	RP23-52N2.1	1950.45	3.6277	0.450823	8.04684	8.49568e-16	3.37889e-14	623.691	303.341	160.534	1051.38	1232.34	736.638	6454.33	3621.67	3370.1
ENSMUSG00000035232.8	Pdk3	919.017	1.85517	0.230797	8.0381	9.12444e-16	3.62144e-14	445.207	383.167	362.766	820.021	1188.43	760.998	1618.5	1497.1	1194.97
ENSMUSG00000059824.12	Dbp	610.285	-2.27937	0.283622	-8.03666	9.23228e-16	3.65667e-14	1684.57	809.669	1198.1	359.167	304.425	375.14	214.35	303.146	243.998
ENSMUSG00000026819.15	Slc25a25	1196.66	2.25686	0.281013	8.03116	9.65532e-16	3.81634e-14	546.481	542.82	391.259	935.7	635.194	656.738	2831.08	1589.4	2641.23
ENSMUSG00000030990.18	Pgap2	2337.63	1.14594	0.142721	8.02926	9.80589e-16	3.86788e-14	1620.39	1318.28	1448.98	2557.08	2138.29	2228.43	3384.04	3211.82	3131.31
ENSMUSG00000027323.10	Rad51	1227.29	2.87885	0.358567	8.02879	9.84426e-16	3.87504e-14	181.492	504.048	202.927	1062.57	1474.56	1161.47	2318.5	2048.35	2091.71
ENSMUSG00000036995.7	Asap3	78.269	3.03287	0.378175	8.01975	1.05961e-15	4.16243e-14	13.0353	18.2461	35.4426	16.7922	24.8809	24.3597	173.965	196.452	201.247
ENSMUSG00000028496.17	Mllt3	765.506	1.59625	0.199062	8.01882	1.06764e-15	4.18543e-14	388.052	472.117	440.601	509.364	635.194	520.324	1429	1042.38	1452.52
ENSMUSG00000062210.13	Tnfaip8	4029.32	-0.985202	0.122932	-8.01422	1.1084e-15	4.33633e-14	5980.21	5325.57	5187.83	3868.74	3838.24	3729.96	3017.47	2694.44	2621.42
ENSMUSG00000032766.9	Gng11	236.553	2.80305	0.35036	8.00049	1.23926e-15	4.83841e-14	63.1712	100.353	36.1376	181.916	251.736	157.851	479.441	476.735	381.638
ENSMUSG00000022102.13	Dok2	2345.88	2.41334	0.301673	7.99984	1.24577e-15	4.85396e-14	630.71	1049.15	471.874	2543.09	2719.33	2291.76	4826.51	3393.88	3186.58
ENSMUSG00000064330.9	Pde6h	3516.82	1.14175	0.14273	7.99941	1.25018e-15	4.86123e-14	2106.71	1943.21	2412.88	3468.53	3634.8	3800.12	5106.09	4312.64	4866.41
ENSMUSG00000042029.7	Ncapg2	7545.08	-2.03539	0.254526	-7.99679	1.27703e-15	4.9556e-14	8924.19	10053.6	10010.8	10964.4	11456.9	9426.24	2020.28	3337.15	1712.16
ENSMUSG00000027347.18	Rasgrp1	122.757	5.46013	0.683064	7.99359	1.31069e-15	5.07595e-14	8.02174	4.56152	5.55963	87.6928	85.6195	93.5414	476.334	56.7341	286.75
ENSMUSG00000032739.16	Pram1	156.936	-1.998	0.250093	-7.98904	1.35994e-15	5.25607e-14	255.693	262.287	337.053	106.351	116.355	120.824	63.166	92.2987	58.3928
ENSMUSG00000066595.9	Mfsd7b	2989.63	-1.69318	0.212042	-7.98512	1.40388e-15	5.41495e-14	4415.97	4851.17	5112.08	2338.78	3410.14	2332.69	1502.52	1704.56	1238.76
ENSMUSG00000026581.14	Sell	921.493	3.4821	0.436153	7.98366	1.42055e-15	5.46827e-14	143.389	264.568	62.5458	848.94	1041.34	759.049	2375.46	1408.19	1389.96
ENSMUSG00000069206.14	Zfp874a	378.362	-1.20351	0.150957	-7.97256	1.55423e-15	5.97085e-14	531.441	447.029	490.637	414.208	447.124	433.603	208.137	205.767	227.315
ENSMUSG00000021367.8	Edn1	73.2506	6.83957	0.85809	7.9707	1.57783e-15	6.04941e-14	2.00544	2.28076	1.38991	20.5238	13.904	8.7695	323.079	65.2018	222.101
ENSMUSG00000022216.17	Psme1	5879.89	1.24597	0.156346	7.96932	1.59548e-15	6.10485e-14	3647.89	4237.65	3109.22	5390.31	5350.85	5137.96	9442.8	8061.32	8540.98
ENSMUSG00000091549.1	RP24-298J16.4	1727.32	1.48949	0.187014	7.96455	1.65822e-15	6.3323e-14	706.916	887.215	618.509	2718.48	2120.73	2314.17	2206.67	2044.12	1929.05
ENSMUSG00000107802.1	RP24-266J20.3	507.01	1.51158	0.189902	7.95975	1.72386e-15	6.56986e-14	204.554	260.006	253.658	553.211	717.155	534.94	650.299	696.897	692.371
ENSMUSG00000068129.5	Cst7	412.214	2.05427	0.258334	7.952	1.83527e-15	6.98058e-14	164.446	232.637	146.635	300.394	347.601	292.317	955.775	594.437	675.688
ENSMUSG00000050234.7	Gja4	113.585	10.5734	1.33	7.94991	1.86642e-15	7.08502e-14	0	0	0	15.8593	8.0497	16.5646	573.672	83.8309	324.288
ENSMUSG00000029415.4	Sdad1	2606.46	1.61174	0.203079	7.93654	2.07903e-15	7.87647e-14	1254.4	1373.02	1029.23	3306.2	2527.61	2812.09	4127.54	3005.21	4022.84
ENSMUSG00000022867.10	Usp25	8039.92	1.36778	0.172452	7.93142	2.16661e-15	8.19211e-14	4758.9	5270.83	4059.23	7619.94	7961.88	6352.04	13593.1	11722.8	11020.6
ENSMUSG00000073491.11	Ifi213	837.588	3.28963	0.414924	7.92827	2.22226e-15	8.38597e-14	160.435	260.006	67.4105	787.369	984.259	580.736	1709.62	1766.38	1222.08
ENSMUSG00000025630.8	Hprt	11609.8	1.71313	0.216452	7.9146	2.48044e-15	9.34187e-14	5926.06	5920.85	4601.98	11278.8	11706.5	11136.3	22196.1	13279.2	18442.7
ENSMUSG00000051098.6	Mblac2	265.769	-1.55914	0.197094	-7.91067	2.56007e-15	9.62283e-14	393.065	376.325	414.887	260.28	232.709	311.805	115.977	134.638	152.238
ENSMUSG00000071669.14	Snx29	1872.6	-1.72444	0.218015	-7.90974	2.57927e-15	9.67605e-14	2839.7	2335.5	2451.8	3000.21	1922.41	1994.58	863.614	714.68	730.952
ENSMUSG00000097471.8	RP23-128P10.1	238.155	-1.80244	0.22799	-7.9058	2.66226e-15	9.96789e-14	402.09	490.363	410.023	138.069	166.116	165.646	91.1248	146.492	133.469
ENSMUSG00000031647.10	Mfap3l	282.763	-2.12605	0.269135	-7.8996	2.79806e-15	1.04559e-13	393.065	474.398	457.28	238.823	387.849	291.342	77.6632	129.557	94.8882
ENSMUSG00000039936.18	Pik3cd	17434.1	1.70674	0.216198	7.89434	2.91852e-15	1.08848e-13	7409.08	6716.83	8160.84	23725.6	15333.9	22795.8	25592.6	20276.1	26896.1
ENSMUSG00000036432.8	Siah2	521.357	1.15476	0.146407	7.88733	3.08711e-15	1.14912e-13	338.919	351.237	343.307	419.806	472.005	467.707	806.661	687.583	804.986
ENSMUSG00000076066.1	Mir223	55.732	-3.11548	0.395257	-7.88215	3.21807e-15	1.19555e-13	99.2691	173.338	118.837	29.8529	19.0266	16.5646	18.6392	13.5484	12.5127
ENSMUSG00000004846.10	Plod3	9721.47	1.7771	0.225897	7.86685	3.63696e-15	1.34856e-13	4135.21	3400.61	5345.58	9867.3	8637.33	11925.6	14998.3	12501.8	16681.6
ENSMUSG00000000686.11	Abhd15	431.457	-2.53765	0.3226	-7.86625	3.65416e-15	1.35232e-13	877.378	741.246	1333.62	139.002	147.822	135.44	102.515	227.783	178.306
ENSMUSG00000022906.15	Parp9	14307.7	2.26915	0.288598	7.86265	3.76095e-15	1.38916e-13	3765.21	6326.82	2918.11	18967.8	16253.8	17878.1	24429.7	16878.8	21350.9
ENSMUSG00000111339.1	00R_Pgap2	894.056	1.13225	0.144034	7.86102	3.81005e-15	1.40459e-13	627.701	517.732	558.048	953.425	807.897	834.077	1280.92	1263.39	1203.31
ENSMUSG00000021189.11	Atxn3	2203.65	-1.0257	0.130626	-7.8522	4.08815e-15	1.50422e-13	3050.27	3044.81	2947.3	2002.94	2328.56	2016.99	1561.55	1345.53	1534.9
ENSMUSG00000003153.10	Slc2a3	575.315	-2.03227	0.258838	-7.85148	4.11149e-15	1.50702e-13	817.215	866.688	1094.55	514.029	577.383	629.456	169.823	311.614	197.076
ENSMUSG00000024456.16	Diaph1	12090.9	1.18853	0.151373	7.85161	4.10714e-15	1.50702e-13	6327.15	7314.39	8623.68	11422.4	11803.1	12571.6	16235.7	17458	17062.2
ENSMUSG00000059839.9	Zfp874b	447.659	-1.72779	0.220271	-7.84391	4.36714e-15	1.59767e-13	707.919	590.716	651.172	482.31	408.339	598.275	171.894	179.517	238.785
ENSMUSG00000102564.1	RP24-159H19.2	160.935	-2.0587	0.262725	-7.83593	4.65385e-15	1.69932e-13	273.742	246.322	209.181	167.922	213.683	163.697	42.4559	71.976	59.4355
ENSMUSG00000049734.9	Trex1	7492.17	2.24907	0.287064	7.83474	4.69808e-15	1.71221e-13	2327.31	3195.34	1565.04	10845	7233.75	8613.6	13363.2	9507.61	10778.7
ENSMUSG00000023307.13	2023-03-05	4521.69	1.90465	0.243111	7.8345	4.70724e-15	1.71229e-13	2365.41	1997.94	1490.68	4616.93	4679.8	3634.47	9198.42	6566.76	6144.8
ENSMUSG00000028796.17	Phc2	5899.65	1.55256	0.198286	7.82991	4.88237e-15	1.77263e-13	3550.62	3599.04	3016.1	5022.74	3559.43	4539.68	11771.7	8626.96	9410.62
ENSMUSG00000014496.8	Ankrd28	2278.58	-2.41328	0.308258	-7.82877	4.92649e-15	1.78527e-13	3311.98	4846.61	3336.47	1798.63	3264.52	1792.88	615.092	928.914	612.081
ENSMUSG00000024539.17	Ptpn2	1615.27	1.90676	0.243571	7.82836	4.94277e-15	1.78779e-13	803.177	656.858	606	1681.09	1591.64	1448.92	3461.71	1931.5	2356.57
ENSMUSG00000059436.13	Max	6610.18	1.69149	0.216208	7.82345	5.13954e-15	1.85546e-13	3502.49	3106.39	2667.23	8181.55	5604.05	6472.87	12035.7	8701.48	9219.8
ENSMUSG00000032788.15	Pdxk	8679.21	-1.53713	0.196564	-7.82001	5.28211e-15	1.90335e-13	17034.2	12094.9	14511.3	7401.64	6757.36	5274.37	4819.26	5465.1	4754.84
ENSMUSG00000105096.1	Gbp10	97.8603	9.39165	1.20112	7.81906	5.32187e-15	1.91407e-13	1.00272	0	0	6.53031	11.7087	20.4622	232.989	233.71	374.339
ENSMUSG00000025877.14	Hk3	23680.9	2.06491	0.26418	7.8163	5.43972e-15	1.9528e-13	7690.85	15087.2	8570.17	15416.2	19035.3	16215.8	46061.5	39727.4	45323.2
ENSMUSG00000070031.11	Sp140	1951.88	1.69521	0.217078	7.80922	5.75432e-15	2.06188e-13	965.617	1117.57	720.667	1896.59	2129.51	1687.64	3364.37	3181.34	2503.59
ENSMUSG00000026112.7	Coa5	7370.18	1.26094	0.16171	7.79755	6.3123e-15	2.25759e-13	4932.37	4739.42	3989.73	6986.5	7109.35	5845.36	12184.8	10533.9	10010.2
ENSMUSG00000076119.1	Mir698	38.3589	3.44508	0.442301	7.789	6.75397e-15	2.41105e-13	9.02446	4.56152	6.25458	31.7187	32.9306	34.1036	92.1603	67.7422	66.7346
ENSMUSG00000025577.7	Cbx2	76.1642	-3.58033	0.460632	-7.77267	7.68516e-15	2.73837e-13	194.527	145.969	211.961	30.7858	28.5398	28.2573	5.17754	28.7904	11.47
ENSMUSG00000031101.6	Sash3	2665.67	-1.39151	0.179141	-7.76772	7.99087e-15	2.84202e-13	4435.02	3776.94	4520.67	2159.67	2020.47	2223.56	1285.07	1850.21	1719.46
ENSMUSG00000025429.8	Pstpip2	2404.84	3.34762	0.431097	7.76535	8.1421e-15	2.89044e-13	689.87	264.568	526.08	2376.1	908.884	1760.72	6722.52	3199.97	5194.87
ENSMUSG00000030748.9	Il4ra	41278.7	2.34891	0.302508	7.76479	8.17781e-15	2.89776e-13	9146.79	7519.66	10320.8	75960.6	47032.2	84024.5	58561.1	30145.3	48797.6
ENSMUSG00000090394.8	RP23-71J17.1	771.714	2.89742	0.373285	7.76195	8.36357e-15	2.95811e-13	193.525	171.057	148.025	1102.69	712.032	800.948	1936.4	636.776	1243.97
ENSMUSG00000058624.12	Gda	4672.39	2.2611	0.291531	7.75595	8.76811e-15	3.09548e-13	1121.04	2157.6	1084.82	5042.33	6604.41	5178.88	7867.79	7204.38	5790.27
ENSMUSG00000033446.7	Lpar6	1810	-2.7641	0.35703	-7.74192	9.79237e-15	3.45073e-13	3377.15	2885.16	5038.42	899.317	747.89	1677.9	397.635	574.115	692.371
ENSMUSG00000026395.16	Ptprc	50757.2	1.4591	0.188502	7.74051	9.90214e-15	3.48301e-13	26365.5	25624.3	30117.2	48778.6	47149.3	53023.4	89027.9	58167.6	78561.2
ENSMUSG00000035355.15	Kcnh4	41.7974	4.16515	0.538116	7.74025	9.92239e-15	3.48374e-13	6.01631	6.84227	2.08486	47.578	46.8346	33.1292	60.0595	92.2987	81.3328
ENSMUSG00000026630.9	Batf3	295.679	3.41494	0.441242	7.73937	9.99092e-15	3.50139e-13	85.231	34.2114	46.5619	309.723	165.385	221.186	922.638	341.251	534.919
ENSMUSG00000050010.8	Shisa3	243.53	1.64048	0.212189	7.73124	1.065e-14	3.72557e-13	117.318	127.722	123.007	249.085	193.925	235.802	425.594	311.614	407.707
ENSMUSG00000044447.5	Dock5	1009.63	-1.69766	0.219602	-7.73061	1.07032e-14	3.73734e-13	1231.34	1309.16	1886.1	1041.12	1016.46	1235.53	405.919	438.63	522.407
ENSMUSG00000104728.1	RP23-336O18.1	89.2473	3.33488	0.431564	7.72744	1.09731e-14	3.82461e-13	8.02174	25.0883	13.8991	112.881	114.159	93.5414	202.96	93.9922	138.683
ENSMUSG00000028136.15	Snx27	3866.94	-1.63896	0.212136	-7.72595	1.11018e-14	3.86247e-13	6182.76	4267.3	6730.63	4560.02	3389.65	4151.87	1743.8	1857.83	1918.62
ENSMUSG00000024896.8	Minpp1	1539.83	1.16899	0.151359	7.72327	1.13381e-14	3.93752e-13	961.607	855.284	1070.92	1327.52	1641.41	1484.97	2252.23	2087.31	2177.22
ENSMUSG00000025626.16	Phf6	2676.82	1.96459	0.254536	7.7183	1.17889e-14	4.08666e-13	850.305	1466.53	888.846	2481.52	3308.43	2626.95	4852.39	3711.42	3905.02
ENSMUSG00000002227.15	Mov10	3031.91	2.13612	0.277106	7.70866	1.27143e-14	4.39952e-13	791.144	1530.39	1032.7	2764.19	3377.95	3085.89	3787.89	6102.72	4814.28
ENSMUSG00000033987.16	Dnah17	623.907	1.99523	0.258889	7.70691	1.28905e-14	4.45245e-13	206.56	223.514	274.507	794.832	571.529	724.946	1082.11	657.946	1079.22
ENSMUSG00000021895.10	Arhgef3	5265.96	2.72482	0.353774	7.70216	1.3378e-14	4.61253e-13	1978.36	723	1280.1	6490.2	4750.05	5809.31	10795.2	6166.23	9401.24
ENSMUSG00000039934.12	Gsap	3196.93	2.52559	0.327989	7.70022	1.35831e-14	4.67484e-13	1148.11	700.193	890.236	3926.58	2458.82	3857.61	7060.1	3221.99	5508.73
ENSMUSG00000025646.9	Atrip	7900.25	2.07623	0.269713	7.69794	1.38275e-14	4.75042e-13	2695.31	3644.65	1938.23	11279.7	7631.11	9043.31	13767.1	9903.9	11198.9
ENSMUSG00000005804.14	Bloc1s6	1814.37	0.784009	0.101927	7.69184	1.45036e-14	4.9712e-13	1300.53	1320.56	1244.66	1933.91	1936.32	1944.88	2276.05	2121.18	2251.25
ENSMUSG00000026663.6	Atf6	13354.9	1.10559	0.143739	7.69168	1.4522e-14	4.9712e-13	7520.38	8495.82	8351.95	14974	13396.2	15024.1	18578.1	15106.5	18747.2
ENSMUSG00000039908.14	Slc26a11	2580.46	-3.48008	0.452529	-7.69027	1.4682e-14	5.01702e-13	5563.08	2597.78	8406.16	2046.79	832.046	2292.74	484.618	383.59	617.295
ENSMUSG00000032350.9	Gclc	979.458	-1.49314	0.194755	-7.66674	1.76428e-14	6.018e-13	1490.04	1459.69	1289.83	1054.18	1156.96	859.411	584.027	508.066	412.92
ENSMUSG00000026358.13	Rgs1	4036.6	3.47883	0.455096	7.64416	2.10309e-14	7.16096e-13	1560.23	741.246	366.936	1484.25	1566.03	858.437	12887.9	8267.08	8597.29
ENSMUSG00000086589.1	RP23-230F2.7	137.174	2.37845	0.311298	7.64043	2.16494e-14	7.35849e-13	41.1114	77.5458	30.578	127.808	125.868	106.208	248.522	237.098	239.827
ENSMUSG00000056692.12	RP24-535N4.2	11096	1.56044	0.204295	7.63821	2.20264e-14	7.47339e-13	5909.02	6367.88	5365.74	11466.3	8891.99	9838.41	21570.7	13915.9	16537.7
ENSMUSG00000043953.12	Ccrl2	3862.07	4.00799	0.525037	7.63373	2.2806e-14	7.72422e-13	865.346	298.779	619.899	1948.83	957.914	1312.5	16101.1	3304.12	9350.14
ENSMUSG00000035929.11	H2-Q4	5249.72	2.35022	0.307968	7.63138	2.32261e-14	7.85265e-13	2450.64	1578.28	1915.99	4064.65	3189.88	3715.35	14731.1	6451.59	9149.94
ENSMUSG00000044072.14	Eml6	361.043	1.90256	0.2494	7.62857	2.37366e-14	8.01109e-13	168.457	189.303	209.181	223.896	137.577	197.801	847.046	577.502	698.628
ENSMUSG00000107999.1	RP24-218I17.4	324.477	-1.67145	0.219194	-7.62543	2.43226e-14	8.19446e-13	516.4	533.697	537.894	349.838	214.415	269.906	148.078	176.976	173.093
ENSMUSG00000024018.17	Ccdc167	1543.48	0.872444	0.114421	7.62483	2.44354e-14	8.21802e-13	1002.72	1158.63	1100.11	1590.6	1508.22	1573.64	2013.03	1934.04	2010.38
ENSMUSG00000016087.13	Fli1	2410.58	-1.26426	0.165866	-7.62218	2.49427e-14	8.36819e-13	4935.38	4598.01	3846.57	956.224	830.582	960.748	1619.54	2017.02	1931.13
ENSMUSG00000052423.14	B4galt3	2578.11	2.0649	0.270911	7.62204	2.49693e-14	8.36819e-13	479.299	704.754	886.761	4148.61	3598.22	4715.07	3199.72	2170.29	3300.23
ENSMUSG00000030921.17	Trim30a	17084.8	2.07397	0.272315	7.61607	2.61515e-14	8.7491e-13	5530.99	9011.27	4595.03	17607.6	20232.6	16256.7	32329.6	22836.7	25362.3
ENSMUSG00000026946.9	Nmi	1982.17	2.14371	0.281607	7.6124	2.69046e-14	8.9854e-13	710.927	1119.85	504.536	1685.75	2004.37	1545.38	3717.48	3461.62	3089.6
ENSMUSG00000074361.10	C5ar2	277.108	-1.93291	0.254149	-7.60539	2.84038e-14	9.46959e-13	504.367	615.805	605.305	115.68	96.5964	106.208	113.906	205.767	130.341
ENSMUSG00000061665.6	Cd2ap	4344.85	1.44265	0.189814	7.60032	2.95399e-14	9.83126e-13	2498.77	2670.77	2509.48	3481.59	3816.29	3258.36	8440.43	5404.13	7023.82
ENSMUSG00000022479.15	Vdr	103.072	3.17302	0.417645	7.59741	3.02123e-14	1.00376e-12	18.0489	22.8076	35.4426	42.9135	38.7849	65.2841	315.83	141.412	247.127
ENSMUSG00000019998.6	Stx7	13198.3	1.43359	0.188907	7.58885	3.22746e-14	1.07042e-12	7781.09	7154.74	6002.32	14708.1	13492.8	13094.8	23134.3	16496.9	16919.3
ENSMUSG00000030560.17	Ctsc	55394.9	2.2197	0.292568	7.58696	3.2751e-14	1.08248e-12	24076.3	19083.1	21384.4	45391.3	36542.7	51421.5	128598	58461.5	113596
ENSMUSG00000037235.13	Mxd4	3306.3	-2.12821	0.280508	-7.58701	3.27375e-14	1.08248e-12	5686.41	4299.23	6820.28	3037.53	2237.08	3830.32	996.159	1239.68	1609.97
ENSMUSG00000040407.17	Akap9	4951.33	1.50802	0.198781	7.58633	3.29102e-14	1.08587e-12	2376.44	2846.39	3233.62	4168.2	3715.3	4165.51	8283.03	6371.15	9402.28
ENSMUSG00000090799.2	Klhl33	45.6181	-3.68692	0.487347	-7.56529	3.87013e-14	1.27475e-12	72.1957	79.8265	142.466	28.92	32.9306	31.1805	3.10653	8.46777	11.47
ENSMUSG00000025764.14	Jade1	555.1	-1.73763	0.229758	-7.5629	3.94183e-14	1.29614e-12	964.615	839.319	805.451	512.163	626.413	466.733	207.102	335.324	238.785
ENSMUSG00000004043.14	Stat5a	2488.47	1.12786	0.149453	7.54656	4.46914e-14	1.4645e-12	1192.23	1350.21	1382.96	3481.59	2872.28	3540.93	2745.13	2744.4	3086.47
ENSMUSG00000034111.6	Tmed8	2973.17	1.46535	0.194169	7.54678	4.46158e-14	1.4645e-12	1453.94	1897.59	1649.82	2296.8	3312.08	2356.07	4545.88	4715.7	4530.65
ENSMUSG00000056116.18	H2-T22	2453.62	1.26756	0.167993	7.5453	4.51258e-14	1.47621e-12	1670.53	1728.81	1271.07	1944.17	2166.83	2080.32	3990.85	3853.68	3376.35
ENSMUSG00000071714.7	Csf2rb2	25868	1.88346	0.249822	7.53923	4.72772e-14	1.54396e-12	11456.1	9529.01	11245	32641.3	19473.7	29536.7	48191.5	30565.3	40173.2
ENSMUSG00000103509.1	WI1-817D1.2	100.564	2.2905	0.303911	7.53674	4.81853e-14	1.57094e-12	30.0815	31.9306	50.0367	71.8334	91.4738	64.3097	214.35	159.194	191.862
ENSMUSG00000052934.14	Fbxo31	468.405	-1.88476	0.250372	-7.52786	5.15798e-14	1.67875e-12	830.25	606.682	1025.75	371.295	315.402	397.551	177.072	259.114	232.528
ENSMUSG00000004633.17	Chn2	1299.97	1.27084	0.169032	7.51837	5.54622e-14	1.80205e-12	671.821	693.35	833.25	1321.92	1279.17	1583.38	1861.84	1867.99	1587.03
ENSMUSG00000066191.12	Anks6	59.4994	-2.61657	0.348254	-7.5134	5.76115e-14	1.86872e-12	130.353	86.6688	139.686	33.5845	34.3942	51.6426	18.6392	18.6291	21.8973
ENSMUSG00000020900.15	Myh10	214.435	3.10609	0.413597	7.50994	5.91524e-14	1.91546e-12	45.1223	66.142	54.2064	157.66	68.0565	128.619	605.773	250.646	553.689
ENSMUSG00000038679.16	Trps1	4011.83	1.46281	0.194934	7.50415	6.18304e-14	1.9988e-12	1769.8	1648.99	1929.19	5411.76	5132.05	5459.5	5677.69	3669.93	5407.59
ENSMUSG00000106702.1	RP24-230P10.6	541.963	-2.30925	0.30805	-7.49635	6.56185e-14	2.11769e-12	933.53	656.858	1193.24	512.163	369.554	648.943	158.433	165.122	239.827
ENSMUSG00000098188.1	Sowahc	2726.41	2.59448	0.3462	7.49417	6.67216e-14	2.14967e-12	986.674	720.72	1009.07	1974.95	1916.56	1501.53	8211.58	2866.34	5350.24
ENSMUSG00000026566.15	Mpzl1	410.706	-1.6229	0.216669	-7.49023	6.87551e-14	2.21147e-12	496.345	572.47	646.307	408.611	484.445	532.017	152.22	223.549	180.392
ENSMUSG00000035121.6	Neil2	111.162	-2.23169	0.298343	-7.4803	7.41532e-14	2.3811e-12	161.438	130.003	232.81	130.606	101.719	130.568	37.2783	36.4114	39.6237
ENSMUSG00000024098.5	Twsg1	2202.26	1.48665	0.198892	7.47468	7.73931e-14	2.4774e-12	973.639	1475.65	1131.38	1821.96	2368.07	2045.24	3601.5	3147.47	3255.4
ENSMUSG00000038831.16	Ralgps1	303.875	-1.19333	0.15965	-7.47465	7.74107e-14	2.4774e-12	379.027	403.694	405.853	372.228	335.16	319.6	159.468	175.283	184.563
ENSMUSG00000026778.13	Prkcq	27.8117	4.23294	0.566791	7.46826	8.12627e-14	2.59634e-12	6.01631	0	3.47477	8.39611	8.0497	12.6671	65.237	74.5164	71.9482
ENSMUSG00000028211.11	Trp53inp1	2257.52	-1.39141	0.186347	-7.46677	8.21901e-14	2.6216e-12	3328.02	2967.27	3723.56	2169.93	1853.63	2452.54	1205.33	1130.45	1486.93
ENSMUSG00000038485.5	Socs7	1874.28	1.09642	0.146882	7.46463	8.3537e-14	2.65656e-12	1234.35	1142.66	1150.15	2109.29	1789.96	1895.19	2811.41	2237.18	2498.38
ENSMUSG00000086327.2	Slfn5os	7256.61	2.82355	0.37826	7.46458	8.35631e-14	2.65656e-12	1634.43	2314.97	778.348	11369.3	8676.11	7119.86	14752.9	9747.25	8916.37
ENSMUSG00000085129.1	RP23-183N8.3	75.0775	-3.74118	0.501308	-7.46284	8.4675e-14	2.68745e-12	258.701	98.0726	175.128	50.3767	17.563	36.0524	10.3551	16.9355	12.5127
ENSMUSG00000097418.7	Mir155hg	345.604	8.14355	1.09205	7.45711	8.84428e-14	2.80239e-12	7.01903	0	2.77982	44.7793	8.0497	26.3085	1732.41	215.081	1074.01
ENSMUSG00000026655.15	Fam107b	1327.32	-1.5224	0.204169	-7.45658	8.87972e-14	2.80898e-12	2648.18	1765.31	2280.14	1019.66	1098.42	800.948	806.661	784.115	742.422
ENSMUSG00000108126.1	RP24-238C11.4	405.284	-2.47744	0.332899	-7.44202	9.91554e-14	3.13148e-12	1251.39	727.562	847.149	127.808	57.8115	127.645	195.711	159.194	153.281
ENSMUSG00000029401.8	Rilpl2	1352.88	-1.74059	0.233983	-7.43893	1.01506e-13	3.20045e-12	3061.3	2082.33	2158.53	880.659	1031.09	776.588	755.921	851.858	577.671
ENSMUSG00000026094.14	Stk17b	1760.46	-1.45394	0.195756	-7.42731	1.10827e-13	3.48859e-12	3146.53	2269.35	2616.5	1490.78	1760.69	1626.26	1100.75	1035.61	797.687
ENSMUSG00000019558.14	Slc6a8	3241.38	-0.921958	0.124214	-7.42231	1.15092e-13	3.61692e-12	3885.53	4331.16	4030.73	3261.42	3747.5	3457.13	2101.05	2310.01	2047.92
ENSMUSG00000026729.9	RP23-71J17.2	175.777	2.90172	0.390992	7.42143	1.15866e-13	3.63529e-12	43.1169	36.4921	35.4426	250.018	167.58	187.083	429.736	154.113	278.408
ENSMUSG00000027630.13	Tbl1xr1	2845.58	-1.19344	0.160915	-7.41658	1.20179e-13	3.76444e-12	3655.91	4796.43	4330.95	2210.98	2676.89	2353.15	1724.12	1885.77	1975.97
ENSMUSG00000037224.15	Zfyve28	425.705	-3.43289	0.463391	-7.40819	1.28032e-13	4.00388e-12	1263.42	396.852	1089.69	418.873	141.236	266.008	98.3733	74.5164	82.3755
ENSMUSG00000041238.15	Rbbp8	3725.13	2.07717	0.280483	7.40568	1.30483e-13	4.07386e-12	1194.24	1806.36	930.543	4260.56	4719.32	4068.08	7039.39	4266.91	5240.75
ENSMUSG00000025591.6	Tma16	1594.75	3.45869	0.467137	7.40401	1.32131e-13	4.11862e-12	335.911	323.868	217.521	1815.43	843.023	1185.83	5108.16	1182.1	3340.9
ENSMUSG00000029676.15	Pot1a	573.598	-1.29696	0.175374	-7.39539	1.40989e-13	4.38758e-12	803.177	736.685	898.575	542.016	541.525	644.071	332.398	289.598	374.339
ENSMUSG00000036737.12	Oxsr1	2979.36	0.968717	0.131026	7.3933	1.43233e-13	4.4502e-12	1820.94	2039	1963.94	3177.46	3301.11	3121.94	4253.87	3516.66	3619.31
ENSMUSG00000097194.2	RP24-263E2.7	506.693	1.89344	0.256467	7.38279	1.55005e-13	4.80815e-12	125.34	230.357	212.656	657.696	514.449	723.971	706.217	646.091	743.465
ENSMUSG00000070427.4	Il18bp	1245.83	2.02983	0.274957	7.38236	1.55511e-13	4.81605e-12	716.943	476.678	446.855	1140.01	778.625	946.132	2881.82	1785.85	2039.58
ENSMUSG00000031862.10	Atp13a1	4704.7	1.21564	0.164832	7.37504	1.64299e-13	5.08002e-12	2715.36	2556.73	3410.83	4214.85	4347.57	4907.03	6449.15	6377.08	7363.75
ENSMUSG00000040855.15	Reps2	2448.61	-1.696	0.230012	-7.37356	1.66129e-13	5.12832e-12	3717.08	2631.99	3920.93	3109.36	2624.2	2862.76	961.988	1335.37	873.806
ENSMUSG00000112652.1	RP23-231J3.5	3980.95	-1.48922	0.202087	-7.36919	1.71664e-13	5.29068e-12	7720.93	5086.09	6856.41	3535.7	3001.81	2620.13	2233.59	2472.59	2301.3
ENSMUSG00000056220.14	Pla2g4a	3584.95	2.6002	0.352928	7.36749	1.73875e-13	5.35021e-12	621.685	1507.58	594.88	3531.03	4898.61	4655.63	6207.87	4608.16	5639.07
ENSMUSG00000026896.14	Ifih1	6575.63	2.05762	0.279392	7.36462	1.77657e-13	5.45783e-12	2493.76	3573.95	1792.29	6381.98	7223.51	5035.64	12850.7	10781.2	9047.75
ENSMUSG00000032402.12	Smad3	401.851	-2.66381	0.361718	-7.36434	1.7803e-13	5.46053e-12	1105	595.278	966.681	255.615	95.8646	176.364	148.078	123.629	150.153
ENSMUSG00000020263.14	Appl2	2869.73	-1.35854	0.184553	-7.36123	1.8222e-13	5.58013e-12	3862.47	3573.95	4750.01	3089.77	2652.01	3142.41	1612.29	1343.84	1800.79
ENSMUSG00000048924.14	Ccdc125	177.63	-1.88937	0.256919	-7.35395	1.92439e-13	5.88366e-12	325.883	216.672	337.053	158.593	137.577	183.185	67.3081	79.597	92.8028
ENSMUSG00000033985.17	Tesk2	418.955	-1.27927	0.174101	-7.34784	2.01436e-13	6.14893e-12	723.962	597.559	685.919	294.797	335.892	304.01	246.451	319.235	262.767
ENSMUSG00000038024.17	Dennd4c	5811.22	-1.18226	0.160923	-7.34673	2.03118e-13	6.1904e-12	8788.82	7909.67	9459.71	5320.34	5072.04	4220.08	4261.12	3824.04	3445.17
ENSMUSG00000038370.6	Pcp4l1	1164.31	-1.05403	0.143491	-7.34562	2.04811e-13	6.23212e-12	1654.48	1532.67	1563.65	1076.57	1102.81	1260.86	711.394	852.704	723.653
ENSMUSG00000030094.8	Xpc	686.616	-1.7258	0.235394	-7.33153	2.27534e-13	6.91256e-12	1192.23	873.53	1340.57	638.105	445.661	656.738	317.901	331.09	383.724
ENSMUSG00000026770.5	Il2ra	54.9202	5.49117	0.749853	7.323	2.42487e-13	7.35517e-12	2.00544	6.84227	0.694954	43.8464	81.9606	49.6939	80.7697	161.734	66.7346
ENSMUSG00000021180.9	Rps6ka5	440.373	-1.59488	0.218	-7.31597	2.55522e-13	7.73833e-12	631.712	652.297	832.555	344.241	457.369	343.959	214.35	275.203	211.674
ENSMUSG00000054519.8	Zfp867	167.901	-1.30189	0.178017	-7.31328	2.60698e-13	7.88263e-12	261.709	257.726	232.81	148.331	155.14	151.03	102.515	96.5326	105.316
ENSMUSG00000051934.5	Spats2	244.276	-1.2233	0.167357	-7.3095	2.68145e-13	8.09502e-12	384.041	346.675	359.291	197.775	223.928	218.263	148.078	147.339	173.093
ENSMUSG00000026764.15	Kif5c	787.023	1.29827	0.177647	7.30815	2.70849e-13	8.16379e-12	467.267	367.202	476.738	730.462	945.474	848.693	994.088	1104.2	1149.09
ENSMUSG00000030729.17	Pgm2l1	957.393	-1.57494	0.215523	-7.30754	2.72076e-13	8.1879e-12	1162.15	1423.19	1557.39	812.557	1207.45	1064.03	410.061	529.236	450.458
ENSMUSG00000087700.2	RP24-103K4.2	896.388	1.75423	0.240153	7.30464	2.78015e-13	8.35353e-12	560.519	380.887	410.023	777.107	774.966	591.454	1890.84	1262.54	1419.15
ENSMUSG00000035385.5	Ccl2	4749.65	4.18296	0.57309	7.29897	2.89988e-13	8.69963e-12	267.726	786.862	89.649	6584.42	9414.49	4942.1	8458.03	6752.2	5451.38
ENSMUSG00000042719.17	Naa25	3807.09	1.81563	0.24885	7.29609	2.96249e-13	8.87359e-12	1287.49	2169	1168.91	4250.3	5001.79	4150.9	5556.54	5739.45	4939.4
ENSMUSG00000049409.9	Prokr1	46.7799	-3.68843	0.505888	-7.291	3.07662e-13	9.20107e-12	99.2691	125.442	69.4954	29.8529	40.9803	34.1036	2.07102	13.5484	6.25637
ENSMUSG00000042331.13	Specc1	3966.21	-0.998068	0.136912	-7.28987	3.10247e-13	9.26391e-12	4745.86	4851.17	5342.8	4444.34	4461	4370.14	2169.39	2746.1	2565.11
ENSMUSG00000090035.3	Galnt4	1266.75	-1.41197	0.194292	-7.26728	3.66804e-13	1.09357e-11	1791.86	1769.87	2197.44	1067.24	1143.79	1265.73	604.737	878.108	681.944
ENSMUSG00000068264.11	Ap5s1	496.395	-1.56694	0.215678	-7.26517	3.72583e-13	1.10907e-11	809.193	720.72	890.236	387.154	409.071	433.603	197.782	322.622	297.177
ENSMUSG00000027852.14	Nras	8477.25	1.19292	0.164262	7.26227	3.80643e-13	1.13131e-11	4854.16	5692.77	4824.37	8748.75	9068.35	7983.17	13658.4	10103.7	11361.6
ENSMUSG00000101438.1	RP23-222K15.31	2066.05	1.83017	0.252051	7.26111	3.83914e-13	1.13926e-11	1133.07	1156.34	757.5	2101.83	1371.38	1259.89	3561.11	3739.37	3513.99
ENSMUSG00000021483.8	Cdk20	526.411	-2.14113	0.29498	-7.25854	3.91296e-13	1.15937e-11	804.18	1026.34	836.724	496.304	548.843	422.885	138.758	298.912	164.751
ENSMUSG00000039763.10	Dnajc28	231.103	-2.39023	0.329353	-7.25735	3.94736e-13	1.16776e-11	537.457	294.218	546.929	150.197	105.378	181.236	71.4501	80.4438	112.615
ENSMUSG00000020611.14	Gna13	21708.5	1.76717	0.243521	7.25677	3.96456e-13	1.17104e-11	10687	8561.97	10050.4	26055	19421.7	20854.9	43985.3	24570.1	31190.1
ENSMUSG00000025154.14	Arhgap19	5212.29	-2.21441	0.305192	-7.25579	3.99324e-13	1.1777e-11	10582.7	5489.78	11746.8	5378.18	3303.3	4413.98	1754.15	2266.82	1974.93
ENSMUSG00000035678.7	Tnfsf9	557.924	3.08883	0.425793	7.25428	4.03797e-13	1.18906e-11	167.454	150.53	157.06	215.5	120.745	163.697	1565.69	518.227	1962.41
ENSMUSG00000041235.12	Chd7	2318.03	1.88207	0.259532	7.2518	4.11264e-13	1.20919e-11	858.327	725.281	906.22	3703.62	2401.74	3074.2	3752.68	2134.72	3305.45
ENSMUSG00000004266.15	Ptpn6	17507.5	1.21592	0.168009	7.23727	4.5781e-13	1.34398e-11	11633.5	10783.4	12142.9	14525.3	12597	15593.2	28950.8	22100.9	29240.2
ENSMUSG00000097754.1	Ptgs2os2	43.6543	5.54067	0.766107	7.23224	4.75093e-13	1.39259e-11	2.00544	9.12303	0	10.2619	16.0994	10.7183	163.61	73.6696	107.401
ENSMUSG00000022255.16	Mtdh	10317.2	1.3066	0.180772	7.22787	4.90628e-13	1.43593e-11	5347.49	5546.8	5415.08	10038	12070.9	14095.5	13671.8	11430.6	15238.4
ENSMUSG00000031879.14	Fam96b	556.987	0.96709	0.133891	7.22299	5.08578e-13	1.48619e-11	387.049	376.325	417.667	492.572	492.495	527.145	821.158	734.156	764.32
ENSMUSG00000025372.16	Baiap2	963.177	-2.18939	0.303395	-7.21631	5.34189e-13	1.55866e-11	2062.59	1498.46	2002.16	642.769	660.807	582.685	275.445	617.3	326.374
ENSMUSG00000036249.16	Rbm43	1766.39	1.02478	0.142132	7.21007	5.59243e-13	1.62928e-11	965.617	1124.41	1060.5	1943.23	2162.44	2242.07	1967.47	2085.61	2346.14
ENSMUSG00000041961.14	Znrf3	195.237	-1.67457	0.232357	-7.20689	5.72428e-13	1.66517e-11	282.766	301.06	375.275	187.513	140.504	167.595	110.799	82.1374	109.486
ENSMUSG00000026816.14	Gtf3c5	916.374	1.32214	0.18359	7.20159	5.95143e-13	1.72862e-11	599.625	515.451	528.86	945.029	707.642	833.103	1531.52	1175.33	1410.81
ENSMUSG00000021298.8	Gpr132	2898.17	3.67438	0.510679	7.19508	6.24246e-13	1.81041e-11	624.693	390.01	653.952	1482.38	480.787	1117.62	11432	2571.66	7330.38
ENSMUSG00000030882.19	Dnhd1	283.535	1.72805	0.24021	7.19391	6.29595e-13	1.82316e-11	129.351	123.161	155.67	278.005	210.756	290.368	564.352	390.364	409.792
ENSMUSG00000049401.10	Ogfr	7528.46	1.43856	0.200012	7.19237	6.36763e-13	1.84114e-11	4134.21	5206.97	3368.44	7580.76	6213.64	6835.34	12806.1	10354.4	11256.2
ENSMUSG00000019478.16	Rab4a	182.235	-1.31168	0.182402	-7.19112	6.42617e-13	1.85527e-11	251.682	253.164	265.472	203.373	189.534	165.646	106.657	98.2261	106.358
ENSMUSG00000060073.9	Psma3	3119.4	1.5578	0.216834	7.1843	6.75519e-13	1.94732e-11	1530.15	1956.89	1249.53	2726.87	3782.63	2915.37	5053.28	4434.57	4425.34
ENSMUSG00000020366.18	Mapk9	1870.86	0.885756	0.123319	7.18266	6.83672e-13	1.96787e-11	1314.56	1359.33	1453.84	1614.85	1733.61	1727.59	2592.91	2332.02	2709.01
ENSMUSG00000044068.7	Zrsr1	501.514	-1.54502	0.215116	-7.18224	6.85772e-13	1.97095e-11	679.843	784.581	822.13	411.41	501.277	532.017	200.889	312.461	269.024
ENSMUSG00000046794.9	Ppp1r3b	594.352	-1.01401	0.141187	-7.18203	6.86848e-13	1.97109e-11	645.75	716.158	743.601	695.012	774.966	730.792	335.505	336.17	371.211
ENSMUSG00000027475.9	Kif3b	6673.25	1.13297	0.157825	7.17862	7.0421e-13	2.01789e-11	4261.55	4173.79	3860.47	7717.9	6245.83	6837.29	9808.34	7664.18	9489.87
ENSMUSG00000030681.18	Mvp	10722.8	0.983686	0.137153	7.17217	7.3819e-13	2.1121e-11	8236.33	7077.19	7448.51	10433.6	8585.37	9700.05	15957.2	14111.5	14955.8
ENSMUSG00000039050.8	Osbpl2	986.865	-1.05957	0.148077	-7.15553	8.33501e-13	2.38125e-11	1421.85	1229.33	1373.92	933.835	934.497	1053.31	590.24	623.228	721.568
ENSMUSG00000026421.14	Csrp1	8647.55	1.2413	0.173483	7.15515	8.35803e-13	2.38428e-11	5059.71	6552.62	4603.37	7439.89	8456.57	7415.1	12560.7	13701.7	12038.3
ENSMUSG00000035954.10	Dock4	2165.38	1.65832	0.232008	7.14769	8.82527e-13	2.5101e-11	1200.25	1040.03	1508.05	1338.71	1178.18	1368.04	4566.59	2879.89	4408.65
ENSMUSG00000045210.8	Vcpip1	8285.18	0.924299	0.129311	7.14785	8.81468e-13	2.5101e-11	4651.61	4921.88	5090.54	10922.4	10777.1	10372.4	10468	8505.87	8856.93
ENSMUSG00000054893.15	Zfp667	98.7603	-1.72878	0.242119	-7.14019	9.32015e-13	2.64692e-11	189.514	143.688	183.468	80.2295	63.6658	71.1304	48.6689	58.4276	50.0509
ENSMUSG00000033857.12	Engase	556.382	-3.17147	0.444209	-7.13958	9.36158e-13	2.65476e-11	1613.37	608.962	1667.89	214.567	202.706	267.957	65.237	190.525	176.221
ENSMUSG00000037110.20	Ralgapa2	1042.34	-0.871974	0.122318	-7.12876	1.01276e-12	2.86773e-11	1289.5	1293.19	1218.25	1186.65	1198.67	1120.55	633.731	718.914	721.568
ENSMUSG00000037331.15	Larp1	7568.11	1.38087	0.193836	7.12388	1.04928e-12	2.96676e-11	4566.38	4340.28	4388.63	8059.34	5288.65	6842.16	12695.3	9888.66	12043.5
ENSMUSG00000018654.17	Ikzf1	10303.3	1.96947	0.276521	7.12233	1.06121e-12	2.99609e-11	3966.75	2949.02	3737.46	16489	10646.8	13202	17941.2	9372.97	14424.1
ENSMUSG00000097700.1	RP23-479D21.2	72.11	2.63389	0.370182	7.11513	1.11811e-12	3.15207e-11	30.0815	22.8076	18.0688	40.1148	51.2254	48.7195	202.96	110.928	124.085
ENSMUSG00000091553.1	Serpina3e-ps	48.0599	9.07189	1.27532	7.11342	1.13198e-12	3.18651e-11	0	0	0	43.8464	21.2219	20.4622	176.036	67.7422	103.23
ENSMUSG00000019850.11	Tnfaip3	6446.73	4.19783	0.590261	7.11182	1.14524e-12	3.21911e-11	1468.98	346.675	893.711	2938.64	866.44	1727.59	24220.5	5976.55	19581.4
ENSMUSG00000021975.8	Ints9	1783.34	0.914176	0.12871	7.10262	1.22417e-12	3.43591e-11	1190.23	1245.29	1308.6	1825.69	1726.29	1696.41	2109.33	2512.39	2435.81
ENSMUSG00000036526.8	Card11	584.399	-1.80561	0.25447	-7.09559	1.28804e-12	3.6099e-11	801.172	1183.71	956.256	453.39	619.095	407.295	246.451	347.179	245.041
ENSMUSG00000034266.6	Batf	361.798	1.77787	0.250644	7.0932	1.31043e-12	3.66729e-11	154.419	198.426	126.482	397.416	369.554	390.73	688.613	421.695	508.851
ENSMUSG00000059142.15	Zfp945	1684.44	1.76942	0.249809	7.0831	1.40967e-12	3.93927e-11	528.432	494.924	694.259	2420.88	2324.17	2822.81	2358.89	1358.23	2157.4
ENSMUSG00000025586.17	Cpeb1	120.73	-2.19331	0.310203	-7.07056	1.54314e-12	4.2997e-11	147.4	193.864	239.064	103.552	114.891	160.774	33.1363	44.8792	49.0082
ENSMUSG00000046080.17	Clec9a	66.1208	3.01534	0.426454	7.07073	1.54119e-12	4.2997e-11	18.0489	11.4038	15.9839	48.5109	68.0565	52.617	181.214	76.2099	123.042
ENSMUSG00000072673.2	Gm10392	186.498	-3.02908	0.428552	-7.06818	1.56983e-12	4.36774e-11	387.049	360.36	623.374	41.0477	45.371	53.5914	20.7102	81.2906	65.6919
ENSMUSG00000022378.14	Fam49b	10153.8	1.37134	0.194048	7.067	1.58322e-12	4.3986e-11	5714.49	6516.13	5399.1	8715.17	10248.7	9195.31	18727.2	12222.4	14646.2
ENSMUSG00000106698.1	RP23-447A7.2	218.556	1.80637	0.255636	7.06618	1.59252e-12	4.41802e-11	110.299	102.634	70.1903	282.669	207.829	215.34	358.286	277.743	342.015
ENSMUSG00000020413.11	Hus1	671.645	1.25299	0.177375	7.06409	1.61672e-12	4.4787e-11	398.079	472.117	381.53	562.54	722.277	543.709	1037.58	982.261	944.712
ENSMUSG00000024908.15	Ppp6r3	8465.33	1.35399	0.191719	7.06237	1.63688e-12	4.52798e-11	4941.39	4422.39	4998.8	9127.51	7186.18	8786.07	14041.5	9604.14	13080
ENSMUSG00000056121.15	Fez2	2564.13	1.09271	0.154892	7.05468	1.73003e-12	4.77877e-11	1689.58	1343.37	1362.8	3280.08	2961.56	3055.69	3255.64	3332.91	2795.55
ENSMUSG00000022765.10	Snap29	8288.02	1.69166	0.239965	7.04963	1.79399e-12	4.94831e-11	4280.6	3519.21	3334.39	10457.8	7926.76	9102.75	15252	8612.57	12106.1
ENSMUSG00000036898.16	Zfp157	368.741	-1.53062	0.217171	-7.04797	1.81544e-12	5.00027e-11	566.536	508.609	613.644	293.864	338.819	412.167	160.504	233.71	190.819
ENSMUSG00000047293.7	Gpr15	59.954	5.45517	0.774278	7.04549	1.84809e-12	5.08292e-11	1.00272	2.28076	2.08486	76.4979	144.163	85.7463	70.4146	108.387	49.0082
ENSMUSG00000031304.18	Il2rg	7182.3	1.83835	0.260985	7.0439	1.86927e-12	5.13379e-11	4048.98	3380.08	3194.7	6123.57	4912.51	4986.93	17390.3	8771.76	11831.8
ENSMUSG00000032035.15	Ets1	150.711	-2.41084	0.343095	-7.02675	2.11402e-12	5.79767e-11	297.807	460.713	243.929	55.9741	69.5201	41.8987	63.166	79.597	43.7946
ENSMUSG00000045382.6	Cxcr4	6495.98	-3.17809	0.452343	-7.02583	2.12797e-12	5.81927e-11	16624.1	6634.73	19630.4	4929.45	1975.83	3929.71	2085.51	953.471	1700.69
ENSMUSG00000059401.13	Mamld1	70.7009	-2.03751	0.289996	-7.02597	2.12588e-12	5.81927e-11	121.329	114.038	117.447	72.7663	71.7155	53.5914	27.9587	35.5646	21.8973
ENSMUSG00000050022.16	Amz1	2107.91	-1.5455	0.220105	-7.02166	2.19246e-12	5.98709e-11	3849.43	2424.45	3670.75	2100.89	1630.43	1885.44	1054.15	1283.71	1071.92
ENSMUSG00000021109.13	Hif1a	10528.3	1.72908	0.246469	7.01543	2.29248e-12	6.25132e-11	6396.34	4864.86	4819.5	8684.38	8990.05	7682.09	23865.4	13073.4	16379.2
ENSMUSG00000034320.14	Slc26a2	7097.88	1.5279	0.217831	7.01415	2.31357e-12	6.29988e-11	2787.56	2616.03	3313.54	11934.6	7438.65	10638.4	9305.08	7323.77	8523.26
ENSMUSG00000107222.1	RP23-253G12.10	248.686	2.12763	0.303493	7.01047	2.37516e-12	6.45842e-11	58.1576	127.722	79.2247	240.689	346.137	261.136	425.594	311.614	387.895
ENSMUSG00000022218.16	Tgm1	287.307	1.93349	0.275893	7.00812	2.41535e-12	6.5584e-11	54.1468	91.2303	75.75	538.284	496.886	501.811	217.457	364.114	246.084
ENSMUSG00000040276.15	Pacsin1	27.3901	4.12704	0.589203	7.00445	2.4796e-12	6.72334e-11	6.01631	0	3.47477	19.5909	11.7087	9.74389	68.3436	70.2825	57.35
ENSMUSG00000031758.10	Cdyl2	268.715	1.47083	0.210004	7.0038	2.49104e-12	6.7448e-11	181.492	177.899	164.704	171.654	142.699	129.594	573.672	406.453	470.27
ENSMUSG00000035834.11	Polr3g	160.566	-1.67192	0.238798	-7.0014	2.53419e-12	6.85195e-11	235.639	257.726	246.014	147.398	183.679	144.21	60.0595	97.3793	72.991
ENSMUSG00000033730.4	Egr3	188.755	3.8928	0.556142	6.99964	2.5662e-12	6.92873e-11	49.1332	15.9653	34.7477	38.249	10.9769	28.2573	714.501	203.226	603.74
ENSMUSG00000073700.3	Klhl21	931.911	-2.39282	0.341898	-6.99863	2.58469e-12	6.96885e-11	2378.45	1126.69	2218.99	676.354	329.306	566.12	317.901	357.34	416.048
ENSMUSG00000097423.1	Gm26522	57.3249	3.09776	0.442649	6.99823	2.59225e-12	6.97943e-11	12.0326	25.0883	9.0344	36.3832	40.2485	38.0012	131.51	74.5164	149.11
ENSMUSG00000070327.14	Rnf213	69426.3	2.08547	0.298192	6.99371	2.67707e-12	7.19769e-11	21601.6	42609.1	20178.7	72373.6	58765.7	51197.3	130998	115145	111968
ENSMUSG00000026222.16	Sp100	10531.7	1.64444	0.235156	6.99298	2.69108e-12	7.22521e-11	4709.77	7216.32	4172.5	10140.6	10015.3	8241.39	18932.2	15234.4	16122.7
ENSMUSG00000085184.9	RP24-144H23.1	83.3522	1.99733	0.285972	6.98438	2.86112e-12	7.67101e-11	30.0815	36.4921	35.4426	96.0889	65.1294	81.8487	142.9	115.162	147.025
ENSMUSG00000039693.11	Msantd3	123.679	2.35218	0.337193	6.97576	3.04229e-12	8.14534e-11	30.0815	45.6152	25.7133	136.204	235.637	147.133	148.078	191.372	153.281
ENSMUSG00000039841.14	Zfp800	2741.49	2.16915	0.310972	6.97537	3.05067e-12	8.15639e-11	1159.14	1110.73	907.61	2729.67	2378.32	2102.73	7054.92	2834.16	4396.14
ENSMUSG00000047881.14	Rell1	3606.23	-1.1023	0.158449	-6.95681	3.48056e-12	9.29281e-11	4933.37	4657.31	5829.27	3053.39	3496.5	3300.26	2090.69	2489.52	2605.78
ENSMUSG00000020034.7	Tcp11l2	1743.01	-2.76528	0.397603	-6.95488	3.52868e-12	9.40816e-11	3086.37	1890.75	4267.71	1800.5	1217.7	2062.78	400.742	265.041	695.5
ENSMUSG00000024805.16	Pcgf5	1193.89	1.28904	0.18537	6.9539	3.55329e-12	9.46065e-11	764.071	825.634	594.88	1097.09	1191.36	954.902	1976.79	1683.39	1656.89
ENSMUSG00000072812.4	Ahnak2	2056.76	-1.25359	0.180287	-6.95328	3.56902e-12	9.48934e-11	2926.93	2752.87	3339.95	2126.08	1506.76	2072.53	1227.08	1231.21	1327.39
ENSMUSG00000041720.14	Pi4ka	7694.38	1.14086	0.164082	6.95302	3.5756e-12	9.49368e-11	4651.61	5143.11	5480.41	7283.16	6379.75	6624.87	12642.5	9315.39	11728.6
ENSMUSG00000108064.1	RP23-4F16.11	149.629	1.98343	0.285308	6.95188	3.60462e-12	9.55747e-11	55.1495	86.6688	100.768	50.3767	45.371	47.7451	350.002	249.799	360.784
ENSMUSG00000036875.15	Dna2	1231.73	1.36233	0.196007	6.95038	3.64292e-12	9.64569e-11	399.082	570.19	567.777	1881.66	1748.25	1975.09	1348.23	1131.29	1463.99
ENSMUSG00000116605.1	RP23-118J3.9	102.352	-1.81223	0.260806	-6.94855	3.6905e-12	9.75818e-11	153.416	145.969	189.027	97.0218	95.1328	101.337	43.4914	59.2744	36.4955
ENSMUSG00000039089.15	L3mbtl3	752.304	0.931542	0.134128	6.94517	3.78008e-12	9.98127e-11	547.484	510.89	517.741	733.261	759.599	690.842	971.307	941.616	1097.99
ENSMUSG00000037849.8	RP23-85A8.1	1174.94	3.35612	0.483315	6.94396	3.81254e-12	1.00531e-10	187.508	332.991	66.0206	1551.42	1659.7	837.001	2273.98	2232.1	1433.75
ENSMUSG00000002699.13	Lcp2	14334	2.92913	0.422072	6.93988	3.92431e-12	1.03337e-10	3856.45	2460.94	2733.25	22981.1	11947.9	16079.4	36563.8	10113.9	22269.5
ENSMUSG00000009376.15	Met	124.028	2.68441	0.387011	6.93627	4.026e-12	1.05869e-10	58.1576	41.0536	21.5436	92.3573	77.5698	59.4378	330.327	234.557	201.247
ENSMUSG00000035107.13	Dcbld2	697.146	2.06273	0.297675	6.92948	4.22399e-12	1.10923e-10	191.519	346.675	218.215	612.916	1013.53	762.947	1247.79	817.14	1063.58
ENSMUSG00000022901.13	Cd86	3914.51	2.69503	0.389117	6.926	4.32896e-12	1.13524e-10	1914.19	782.3	978.495	3289.41	1871.92	2572.39	11508.6	5850.38	6462.83
ENSMUSG00000045404.16	Kcnk13	1919.61	-1.27183	0.183668	-6.92461	4.37184e-12	1.14492e-10	3464.39	2882.88	2874.33	1593.4	1404.31	1238.45	1256.07	1475.09	1087.57
ENSMUSG00000007617.18	Homer1	1531.36	2.10299	0.303925	6.91943	4.53451e-12	1.1859e-10	493.337	522.294	482.298	2133.55	1961.2	1757.8	3248.39	1329.44	1853.97
ENSMUSG00000073489.6	Ifi204	25599.1	2.8675	0.414584	6.91657	4.62712e-12	1.20847e-10	5612.21	10361.5	2496.27	25553.1	29175	22462.6	55233	39793.4	39705
ENSMUSG00000029413.14	Naaa	2816.82	2.20659	0.319104	6.91496	4.6799e-12	1.22059e-10	1013.75	1053.71	1335.7	2092.5	1484.8	2652.29	6378.73	3108.52	6231.34
ENSMUSG00000100113.1	RP23-231M6.2	69.2359	4.69073	0.678477	6.91361	4.72458e-12	1.23057e-10	11.0299	2.28076	5.55963	29.8529	19.7583	33.1292	255.771	45.726	220.016
ENSMUSG00000035093.16	Secisbp2l	10760.6	1.24434	0.180089	6.90959	4.86049e-12	1.26254e-10	6467.53	5804.53	6989.15	11429.9	9024.44	11481.2	16040	12711.8	16896.4
ENSMUSG00000057596.13	Trim30d	2689.22	1.78997	0.259055	6.9096	4.86033e-12	1.26254e-10	1185.21	1459.69	812.401	3394.83	2965.95	2459.36	4855.5	3526.83	3543.19
ENSMUSG00000032180.11	Tmed1	1537.12	1.31732	0.19066	6.90923	4.87283e-12	1.26404e-10	835.264	875.811	981.275	1401.22	1282.1	1742.21	2499.72	1871.38	2345.1
ENSMUSG00000048175.13	Asb8	1617.91	0.736688	0.106629	6.90886	4.88568e-12	1.26565e-10	1142.1	1154.06	1145.98	1910.58	1741.66	1732.46	1882.55	1915.41	1936.35
ENSMUSG00000108033.1	RP23-329D23.8	36.3521	4.63945	0.672182	6.90207	5.12509e-12	1.32588e-10	2.00544	6.84227	2.08486	32.6516	24.1491	38.9756	82.8407	40.6453	96.9737
ENSMUSG00000040785.19	Ttc3	1296.11	-1.26189	0.182872	-6.90036	5.18701e-12	1.3401e-10	1828.96	1498.46	2119.61	1354.57	1135.01	1451.84	771.454	718.914	786.217
ENSMUSG00000059182.7	Skap2	13909.5	0.980997	0.142324	6.8927	5.47446e-12	1.41245e-10	9650.16	9139	9299.18	13574.7	13768.6	14307	21069.5	15793.2	18584.5
ENSMUSG00000098292.1	RP23-59B16.8	168.624	2.14782	0.31175	6.88955	5.59711e-12	1.44216e-10	50.1359	63.8612	31.2729	285.468	260.517	209.494	251.629	201.533	163.708
ENSMUSG00000016552.13	Foxred2	514.57	-2.05521	0.29875	-6.87939	6.01095e-12	1.54498e-10	861.335	723	977.8	475.78	505.667	471.604	133.581	308.227	174.136
ENSMUSG00000033960.5	Jcad	217.771	1.73261	0.251856	6.87936	6.01227e-12	1.54498e-10	83.2256	114.038	85.4793	267.743	294.912	192.929	334.469	328.549	258.597
ENSMUSG00000040613.14	Apobec1	10095.6	-1.84945	0.268878	-6.87839	6.05332e-12	1.55344e-10	19429.7	18405.7	19307.2	6325.07	6076.06	5461.45	3950.47	7821.68	4083.32
ENSMUSG00000057561.9	Eif1a	9773.12	1.59746	0.232347	6.87533	6.18482e-12	1.58507e-10	4915.32	5311.89	3426.12	11931.8	10713.4	10364.6	17201.9	11130.9	12962.2
ENSMUSG00000035208.16	Slfn8	7534.93	1.91505	0.279027	6.86334	6.72685e-12	1.72168e-10	3229.75	3060.78	2132.12	10987.7	8725.14	7926.66	14646.2	8218.82	8887.17
ENSMUSG00000033213.16	RP23-101F14.3	282.859	3.89058	0.566882	6.86312	6.73722e-12	1.72203e-10	33.0897	66.142	25.7133	108.217	364.432	147.133	415.239	1050	335.758
ENSMUSG00000038375.15	Trp53inp2	2901.28	-1.048	0.15272	-6.86224	6.77892e-12	1.72808e-10	3903.58	3640.09	4524.15	2809.9	2469.06	2923.17	1833.89	1867.99	2139.68
ENSMUSG00000043263.13	Ifi209	5415.77	2.71296	0.395341	6.86233	6.77486e-12	1.72808e-10	1509.09	1890.75	684.529	5394.97	8379.74	4141.16	9891.18	10629.6	6220.92
ENSMUSG00000039911.13	Spsb1	240.318	2.39314	0.348813	6.86081	6.84692e-12	1.7431e-10	71.193	45.6152	51.4266	333.979	505.667	262.111	332.398	358.187	202.289
ENSMUSG00000002996.17	Hbp1	4858.97	-1.18527	0.172936	-6.85381	7.19095e-12	1.82826e-10	7554.48	6148.92	7374.85	4736.34	3975.82	4666.35	3490.7	2612.31	3170.94
ENSMUSG00000030595.15	Nfkbib	1567.79	1.93005	0.281665	6.85227	7.26849e-12	1.84552e-10	1072.91	647.735	621.289	1140.01	844.487	848.693	3683.3	2304.93	2946.75
ENSMUSG00000041488.16	Stx3	3149.14	1.17146	0.171215	6.84205	7.80666e-12	1.97955e-10	1716.65	2287.6	1731.82	3102.83	3302.57	3309.03	4764.38	3792.71	4334.62
ENSMUSG00000042228.14	Lyn	15861.4	1.4756	0.215755	6.83924	7.96169e-12	2.01619e-10	9088.64	6887.89	7003.05	21274.8	16007.2	18575.8	26410.6	18137.1	19367.6
ENSMUSG00000021579.4	Lrrc14b	641.811	-1.69979	0.24861	-6.83718	8.07671e-12	2.04262e-10	987.677	914.584	1337.09	531.754	398.094	608.019	272.339	333.63	393.108
ENSMUSG00000035186.6	Ubd	44.4049	9.24955	1.35305	6.8361	8.13799e-12	2.05541e-10	0	0	0	5.59741	0.731791	0.974389	218.492	50.8066	123.042
ENSMUSG00000010021.13	Kif19a	253.58	1.96682	0.287733	6.83558	8.1672e-12	2.06007e-10	129.351	109.476	90.344	259.347	157.335	252.367	488.76	326.009	469.228
ENSMUSG00000055172.10	C1ra	215.876	2.33437	0.341658	6.83249	8.34534e-12	2.10224e-10	75.2038	114.038	56.9862	178.184	126.6	181.236	553.997	289.598	367.04
ENSMUSG00000020205.8	Phlda1	137.606	4.30987	0.63087	6.83162	8.39617e-12	2.11227e-10	27.0734	9.12303	12.5092	81.1624	42.4439	75.028	480.476	77.9035	432.732
ENSMUSG00000028403.15	Zdhhc21	2015.51	1.29198	0.189273	6.82603	8.72979e-12	2.19332e-10	1014.75	1270.38	1270.38	1614.85	2345.39	1923.44	2953.27	2696.14	3051.02
ENSMUSG00000006418.17	Rnf114	6921.74	1.25457	0.183899	6.82208	8.97334e-12	2.25156e-10	3605.77	4636.78	3419.17	8229.13	6724.43	7882.81	10567.4	8425.43	8804.8
ENSMUSG00000033871.14	Ppargc1b	202.027	1.93114	0.283314	6.81623	9.34599e-12	2.33894e-10	115.313	102.634	120.227	77.4308	41.7121	64.3097	327.221	524.155	445.245
ENSMUSG00000036902.11	Neto2	116.175	3.32205	0.487369	6.8163	9.34152e-12	2.33894e-10	18.0489	45.6152	15.9839	59.7057	119.282	41.8987	318.937	213.388	212.717
ENSMUSG00000024732.7	Ccdc86	1524.58	1.67358	0.24556	6.81536	9.40263e-12	2.35005e-10	714.938	832.477	453.11	1946.03	1913.63	1509.33	2276.05	2191.46	1884.21
ENSMUSG00000048756.11	Foxo3	2379.2	-1.67147	0.245546	-6.80715	9.95492e-12	2.48484e-10	4815.05	3179.38	4832.71	1671.76	1185.5	1699.34	1085.21	1476.78	1467.12
ENSMUSG00000034714.9	Ttyh2	3954.64	-1.44193	0.21197	-6.80254	1.02791e-11	2.56243e-10	5069.74	5284.52	7103.12	3712.02	3502.35	4492.91	1738.62	2368.44	2320.07
ENSMUSG00000020088.10	Sar1a	6095.51	1.02556	0.150775	6.80194	1.03217e-11	2.5697e-10	4451.06	4155.54	4110.65	5339	5463.55	5446.84	9962.63	7270.43	8659.86
ENSMUSG00000027010.16	Slc25a12	2282.73	1.1971	0.176173	6.79503	1.0829e-11	2.69251e-10	1367.71	1790.4	1289.83	1876.07	2228.3	1825.03	3417.18	3535.29	3214.73
ENSMUSG00000005583.16	Mef2c	2786.93	-1.13793	0.167813	-6.78095	1.19388e-11	2.9646e-10	4479.14	3843.08	4283.7	2481.52	1885.09	2378.48	1779	1809.56	2142.81
ENSMUSG00000043340.3	RP23-23C4.1	177.934	2.15813	0.31837	6.77867	1.21284e-11	3.00778e-10	70.1903	75.265	60.461	184.715	150.017	149.082	424.559	193.065	294.049
ENSMUSG00000037991.9	Rmi2	60.1275	4.86443	0.717662	6.77817	1.21708e-11	3.0144e-10	3.00815	9.12303	1.38991	27.987	114.891	73.0792	71.4501	124.476	115.743
ENSMUSG00000067365.10	Tmem128	1898.48	1.08701	0.160462	6.77427	1.25036e-11	3.09283e-10	1135.08	1384.42	1134.86	1724.94	1975.83	1988.73	2895.28	2326.94	2520.27
ENSMUSG00000027009.18	Itga4	31095.4	2.27689	0.336156	6.77332	1.25862e-11	3.10924e-10	12086.8	7328.08	12928.2	35359.8	21609	33772.3	66391.6	31822.7	58559.6
ENSMUSG00000027346.15	Gpcpd1	1654.36	-1.51786	0.224159	-6.77137	1.2757e-11	3.14739e-10	2997.12	2517.96	2719.35	1210.91	1499.44	1066.96	1218.79	767.18	891.532
ENSMUSG00000030717.9	Nupr1	1055.76	2.09108	0.309189	6.76313	1.35042e-11	3.32745e-10	336.913	629.489	365.546	739.791	953.523	836.026	2180.78	1248.15	2211.63
ENSMUSG00000045932.12	Ifit2	38038.9	3.33592	0.493592	6.75845	1.39473e-11	3.43222e-10	7884.37	10715	2373.96	32515.4	55551.7	21583.7	70537.8	89409.5	51778.7
ENSMUSG00000089774.2	Slc5a3	961.05	-2.13284	0.31566	-6.75676	1.41113e-11	3.46813e-10	1173.18	1838.29	2327.4	633.44	627.145	832.129	306.511	351.412	559.945
ENSMUSG00000060450.13	Rnf14	3425.35	1.15337	0.170942	6.74715	1.5078e-11	3.70092e-10	2440.62	2216.9	2212.04	2753.93	3006.2	2913.42	5929.32	4089.93	5265.78
ENSMUSG00000102270.1	RP23-466K3.1	92.2142	2.23031	0.330565	6.74696	1.50971e-11	3.70092e-10	38.1033	45.6152	29.1881	85.8269	68.0565	48.7195	210.208	136.331	167.879
ENSMUSG00000079614.3	Seh1l	2651.25	1.14585	0.169845	6.74644	1.51514e-11	3.70948e-10	1755.76	1824.61	1622.02	2367.7	2420.03	2366.79	4544.85	3121.22	3838.28
ENSMUSG00000038069.6	Cdkn2aip	444.576	-1.12855	0.16731	-6.74523	1.52786e-11	3.73586e-10	619.68	592.997	662.986	397.416	433.952	435.552	240.238	324.316	294.049
ENSMUSG00000107215.1	RP23-253G12.9	350.107	1.75735	0.260581	6.74397	1.54117e-11	3.7636e-10	101.275	187.022	133.431	373.161	522.499	433.603	523.967	400.525	475.484
ENSMUSG00000028792.14	Ak2	2588.79	1.04455	0.154946	6.74138	1.5689e-11	3.82643e-10	1888.12	2084.61	1666.5	2098.1	1959.74	1988.73	4279.76	3365.94	3967.58
ENSMUSG00000037965.14	Zc3h7a	5384.14	1.39654	0.207306	6.73662	1.62115e-11	3.94884e-10	2651.19	3485	3548.43	4301.61	4720.78	4258.08	9886	6512.56	9093.63
ENSMUSG00000109455.1	RP23-466P2.3	110.92	2.49918	0.371006	6.73622	1.62558e-11	3.95461e-10	49.1332	29.6499	27.7982	102.619	83.4241	97.4389	217.457	122.783	267.981
ENSMUSG00000035064.17	Eef2k	859.098	-2.23854	0.333015	-6.72203	1.79211e-11	4.3542e-10	1700.61	887.215	1813.83	965.553	514.449	915.926	264.055	307.38	362.869
ENSMUSG00000066036.14	Ubr4	13709.7	0.958789	0.142786	6.71486	1.88249e-11	4.56802e-10	8864.03	9572.34	11088.7	13233.2	12276.5	10956	19110.3	19590.2	18696.1
ENSMUSG00000017670.16	Elmo2	3414.59	1.07436	0.160007	6.71446	1.88762e-11	4.57468e-10	2089.66	1950.05	2142.54	4240.97	3269.64	4009.61	4637.01	3821.5	4570.28
ENSMUSG00000048490.14	Nrip1	2349.54	1.18351	0.176288	6.71352	1.89987e-11	4.59856e-10	1186.22	1144.94	1291.92	3415.35	2770.56	3097.58	3083.74	2238.03	2917.55
ENSMUSG00000021814.17	Anxa7	8761.38	0.97247	0.144905	6.71111	1.93151e-11	4.66923e-10	5405.65	6217.35	5410.22	9404.58	9424	9584.09	12699.5	9811.6	10895.5
ENSMUSG00000073755.4	RP23-204N19.8	441.143	-1.42028	0.211688	-6.70931	1.95547e-11	4.7212e-10	685.859	620.366	642.137	451.524	368.091	474.528	182.25	278.59	266.938
ENSMUSG00000001424.14	Snd1	8485.61	1.04052	0.155204	6.70425	2.02446e-11	4.88162e-10	6327.15	5457.85	6684.76	6949.18	5874.08	7064.32	13190.3	11307	13515.8
ENSMUSG00000050232.6	Cxcr3	124.181	-2.00701	0.299603	-6.69889	2.10015e-11	5.05778e-10	209.568	177.899	215.436	129.673	117.818	117.901	37.2783	74.5164	37.5382
ENSMUSG00000021377.15	Dek	8241.04	1.20594	0.180055	6.69762	2.11844e-11	5.09542e-10	4616.51	5145.39	3824.33	9436.3	10905.1	8921.51	11941.5	10054.6	9324.07
ENSMUSG00000030852.17	Tacc2	118.145	-2.18206	0.325891	-6.69567	2.14691e-11	5.15743e-10	220.598	200.707	200.147	79.2966	136.845	89.6438	34.1718	64.355	37.5382
ENSMUSG00000004040.16	Stat3	17020	1.85977	0.2778	6.69464	2.16206e-11	5.18733e-10	6985.94	5961.9	8019.07	22832.8	13012	20252.7	31274.4	18210.8	26630.2
ENSMUSG00000061589.14	Dot1l	3505.61	1.25979	0.188287	6.6908	2.21955e-11	5.31859e-10	2313.27	2882.88	2139.76	2505.77	2261.97	1903.96	5926.22	5147.56	6469.08
ENSMUSG00000020525.17	Ppm1d	449.941	-0.969404	0.144909	-6.68975	2.23549e-11	5.35012e-10	668.813	634.051	633.103	358.234	354.187	411.192	321.008	313.307	355.57
ENSMUSG00000000149.10	Gna12	11224.6	-1.66381	0.248766	-6.68822	2.259e-11	5.39963e-10	21176.4	12582.9	20811.1	11222.8	7473.05	10529.3	5409.5	5744.53	6071.81
ENSMUSG00000042289.11	Hsd3b7	4002.93	0.947974	0.141763	6.68702	2.27755e-11	5.43718e-10	2581	2935.34	2815.95	3934.98	3430.63	4261.98	5641.45	4939.25	5485.79
ENSMUSG00000106825.1	RP23-297M4.7	390.101	-2.84085	0.425222	-6.68085	2.37562e-11	5.66427e-10	586.59	688.789	1030.62	270.541	299.302	313.753	40.3848	169.355	111.572
ENSMUSG00000104559.1	RP23-131F7.5	904.796	0.961382	0.143996	6.67644	2.44808e-11	5.82978e-10	591.604	647.735	627.543	904.915	875.954	864.283	1329.59	1053.39	1248.15
ENSMUSG00000038068.15	Rnf144b	1242.53	-1.3524	0.202611	-6.67483	2.47522e-11	5.88708e-10	1626.41	1201.96	1651.21	1879.8	1389.67	1675.95	510.506	616.454	630.85
ENSMUSG00000036412.5	Arsi	56.8851	3.57331	0.536403	6.66162	2.70816e-11	6.43315e-10	10.0272	6.84227	3.47477	126.875	59.275	73.0792	77.6632	97.3793	57.35
ENSMUSG00000050002.14	Idnk	1037.64	1.4234	0.213738	6.65954	2.74686e-11	6.517e-10	605.642	481.24	665.766	923.573	802.774	1137.11	1681.67	1318.43	1722.59
ENSMUSG00000030522.14	Mtmr10	1637.55	-1.21876	0.183243	-6.65107	2.90977e-11	6.89497e-10	3005.15	2153.04	2303.08	1519.7	1304.78	1243.32	1163.91	994.963	1050.03
ENSMUSG00000052336.7	Cx3cr1	700.9	-3.40612	0.512248	-6.64936	2.94373e-11	6.96684e-10	895.427	1085.64	2531.02	344.241	509.326	517.401	82.8407	265.041	77.1619
ENSMUSG00000023066.9	Rttn	855.288	-2.13098	0.32068	-6.64518	3.02856e-11	7.15875e-10	1335.62	1142.66	1792.29	671.689	1054.51	725.92	223.67	466.574	284.665
ENSMUSG00000022052.9	Ppp2r2a	2522.6	0.992407	0.149425	6.6415	3.10503e-11	7.33048e-10	1740.72	1646.71	1457.32	2809.9	2817.39	2598.7	3662.59	2976.42	2993.67
ENSMUSG00000024772.9	Ehd1	8130	2.56939	0.38688	6.64132	3.1089e-11	7.33058e-10	4140.22	2800.77	2166.87	4224.18	2663.72	3112.2	27330.2	9370.43	17361.4
ENSMUSG00000026544.6	Dusp23	414.135	1.72628	0.260018	6.63907	3.15658e-11	7.43387e-10	223.606	177.899	158.449	550.412	406.876	356.627	766.276	569.881	517.193
ENSMUSG00000021871.19	RP23-243M12.7	7404.95	2.19808	0.331176	6.63721	3.19677e-11	7.51926e-10	2180.91	4351.69	1610.21	7569.56	7135.69	6483.59	13775.4	12828.7	10708.8
ENSMUSG00000053175.17	Bcl3	2891.93	3.02321	0.455558	6.63628	3.21691e-11	7.55738e-10	914.479	385.448	792.942	3392.03	1110.13	2384.33	7126.37	3203.36	6718.3
ENSMUSG00000010051.15	Hyal1	398.193	-2.21591	0.333952	-6.63543	3.23568e-11	7.59217e-10	732.987	878.092	583.761	271.474	367.359	279.65	93.1958	235.404	141.811
ENSMUSG00000059714.13	Flot1	4028.3	1.17489	0.177068	6.63523	3.2399e-11	7.59278e-10	2541.89	2096.02	2630.4	4412.62	3484.79	4658.56	5748.11	4908.77	5773.58
ENSMUSG00000096606.2	Tpbgl	194.509	-1.81544	0.273841	-6.62954	3.36724e-11	7.88156e-10	397.076	234.918	302.305	203.373	157.335	189.032	67.3081	103.307	95.931
ENSMUSG00000031701.6	Dnaja2	8868.55	1.52544	0.230108	6.62923	3.37433e-11	7.88852e-10	5095.81	5323.29	4075.21	8023.89	8475.6	7110.12	18360.6	10861.6	12490.8
ENSMUSG00000044252.17	Osbpl1a	1572.99	0.800829	0.120842	6.6271	3.42352e-11	7.99376e-10	1118.03	1151.78	1127.91	1570.07	1667.02	1606.77	2122.79	2000.09	1792.45
ENSMUSG00000001521.12	Tulp3	722.262	1.27598	0.192566	6.62618	3.44492e-11	8.03397e-10	335.911	401.413	369.02	871.33	954.987	899.361	723.821	1082.18	862.336
ENSMUSG00000056144.14	Trim34a	1326.1	1.13519	0.171489	6.61962	3.60129e-11	8.38843e-10	647.756	873.53	604.61	1654.03	1814.84	1704.21	1549.12	1508.11	1578.69
ENSMUSG00000043157.8	Arl11	3970.27	-1.51735	0.229521	-6.61094	3.81896e-11	8.88465e-10	6706.18	5841.02	5725.03	3534.76	3943.62	3600.37	1664.06	2896.82	1820.6
ENSMUSG00000096764.1	RP23-208E23.3	3757.8	-1.02143	0.154709	-6.60227	4.04906e-11	9.40855e-10	4642.58	5138.55	6121.15	3362.18	3162.07	3556.52	2582.56	2431.94	2822.66
ENSMUSG00000027708.14	Dcun1d1	1578.43	1.51419	0.229388	6.601	4.08386e-11	9.47791e-10	721.957	789.142	611.559	2189.52	1733.61	2109.55	2528.71	1507.26	2014.55
ENSMUSG00000026029.14	Casp8	4678.13	1.00973	0.153011	6.59908	4.13723e-11	9.59016e-10	3145.53	2862.35	2837.5	5238.24	5218.4	4986.93	7019.71	5469.33	5325.21
ENSMUSG00000029048.3	Rer1	5250.67	1.02901	0.156031	6.59487	4.25639e-11	9.85446e-10	3487.45	3514.65	3609.59	4363.18	5164.98	5458.53	7850.19	6188.25	7619.21
ENSMUSG00000061143.15	Maml3	215.368	-2.09236	0.31767	-6.58659	4.5004e-11	1.04068e-09	327.889	257.726	303.695	363.832	190.266	285.496	95.2668	60.9679	53.1791
ENSMUSG00000025161.16	Slc16a3	2060.59	1.52244	0.231496	6.57656	4.81472e-11	1.11203e-09	1190.23	1480.21	1159.88	1078.43	1569.69	1080.6	4137.89	3962.07	2886.27
ENSMUSG00000034875.5	Nudt19	790.042	1.13191	0.172133	6.57582	4.8386e-11	1.1162e-09	520.411	545.101	432.956	676.354	902.298	764.896	1086.25	1114.36	1067.75
ENSMUSG00000022900.14	Ildr1	28.6986	4.99731	0.760468	6.57136	4.98569e-11	1.14875e-09	0	0	3.47477	31.7187	32.1988	31.1805	53.8465	65.2018	40.6664
ENSMUSG00000020737.12	Hn1	5839	1.11737	0.170109	6.56855	5.08061e-11	1.16921e-09	3594.74	4317.47	3112	5950.05	6218.03	5469.25	8827.71	7806.44	7255.3
ENSMUSG00000032575.16	Manf	3971.47	1.56128	0.237699	6.5683	5.08942e-11	1.16983e-09	2174.9	1824.61	2446.24	2673.7	3686.03	3897.56	6177.84	4986.67	7875.72
ENSMUSG00000092463.1	RP23-440J15.6	3836.12	1.78785	0.272454	6.56202	5.30826e-11	1.21867e-09	2294.22	1836.01	1724.18	3193.32	2628.59	2629.88	9450.05	4620.86	6147.92
ENSMUSG00000070002.7	Ell	931.465	-1.06377	0.162243	-6.55669	5.50144e-11	1.26152e-09	1258.41	1156.34	1400.33	1000.07	810.824	929.568	586.098	677.422	564.116
ENSMUSG00000022710.17	Usp7	6833.78	0.965643	0.147428	6.54993	5.75656e-11	1.31844e-09	4464.1	4757.66	4583.22	7712.3	6606.61	6424.15	10167.7	8073.17	8715.12
ENSMUSG00000046096.7	RP23-17C12.7	1239.94	1.20812	0.184492	6.54834	5.81783e-11	1.33088e-09	738	809.669	902.05	996.339	941.083	1106.91	2038.92	1519.12	2107.35
ENSMUSG00000026821.15	Ralgds	20728.1	3.26582	0.498755	6.54794	5.8338e-11	1.33294e-09	6711.19	1945.49	3046.68	30635.6	11021.5	20592.7	54338.3	21762.2	36499.7
ENSMUSG00000021091.8	Serpina3n	38.4381	9.03	1.38089	6.53927	6.18183e-11	1.41078e-09	0	0	0	7.46321	0	1.94878	150.149	136.331	50.0509
ENSMUSG00000015243.4	Abca1	8432.15	-2.07621	0.317508	-6.53909	6.18948e-11	1.41085e-09	17236.7	9875.68	13769.1	10968.1	6494.64	7849.68	4043.66	3541.22	2110.48
ENSMUSG00000047798.15	Cd300lf	3967.83	2.12767	0.325578	6.53507	6.35816e-11	1.44758e-09	684.856	1772.15	1216.86	4225.11	5661.13	6127.94	4514.82	6145.91	5361.71
ENSMUSG00000026466.16	Tor1aip1	12399.5	1.15658	0.177011	6.53394	6.40636e-11	1.45682e-09	7915.46	7567.56	7338.71	14304.2	11593	11999.6	20502	14608.6	15766
ENSMUSG00000060733.13	Ipmk	1279.51	-0.855292	0.131052	-6.52637	6.73832e-11	1.53049e-09	1706.63	1742.5	1615.77	1192.25	1297.46	1165.37	865.685	1027.99	901.96
ENSMUSG00000033799.10	Fam208b	1781.52	0.932608	0.143045	6.5197	7.04465e-11	1.59818e-09	1222.31	1290.91	1146.67	1690.42	2005.84	1702.26	2518.36	2134.72	2322.16
ENSMUSG00000068245.14	Phf11c	2212.66	2.69488	0.413621	6.51535	7.25226e-11	1.64333e-09	553.5	1062.83	293.965	1855.54	2442.72	1389.48	4878.28	4240.66	3197
ENSMUSG00000056501.3	Cebpb	1673.2	2.24391	0.344478	6.51394	7.32026e-11	1.65678e-09	1069.9	380.887	550.403	1294.87	1152.57	1103.98	3902.83	2718.15	2885.23
ENSMUSG00000037750.16	Fam222b	747.051	0.992101	0.15233	6.51286	7.37356e-11	1.66688e-09	548.487	588.436	533.03	649.3	507.863	584.634	1025.15	1154.16	1132.4
ENSMUSG00000040557.14	Wbscr27	192.29	-1.38406	0.212791	-6.50431	7.80526e-11	1.76239e-09	276.75	250.883	282.151	194.976	180.021	234.828	83.8762	113.468	113.657
ENSMUSG00000050565.16	Tor1aip2	17514.9	1.38498	0.212972	6.50312	7.86721e-11	1.77429e-09	8997.39	12717.5	8125.4	16740	18201.1	14952	29896.2	24614.1	23390.5
ENSMUSG00000036273.15	Lrrk2	497.428	1.61842	0.249006	6.49954	8.05665e-11	1.81488e-09	208.565	321.587	309.949	298.529	395.167	372.217	923.674	663.873	983.292
ENSMUSG00000078616.2	Trim30c	1219.7	2.77568	0.427336	6.49531	8.28613e-11	1.86438e-09	240.652	328.429	104.243	2058.91	2520.29	1152.7	1731.37	1814.64	1026.04
ENSMUSG00000052125.16	RP24-112H7.1	322.446	1.94922	0.300117	6.49486	8.31084e-11	1.86775e-09	107.291	75.265	177.213	336.777	431.025	351.755	500.151	402.219	520.321
ENSMUSG00000111133.1	RP23-354J5.3	262.135	1.0645	0.163967	6.49214	8.46241e-11	1.89958e-09	177.481	164.215	164.009	274.273	248.809	270.88	385.209	343.791	330.545
ENSMUSG00000020889.11	Nr1d1	134.393	-2.47767	0.381774	-6.48987	8.59082e-11	1.92615e-09	408.106	212.11	296.745	41.9806	36.5895	49.6939	38.3138	86.3712	39.6237
ENSMUSG00000025993.10	Slc40a1	4070.15	-2.15371	0.331944	-6.48817	8.68849e-11	1.94577e-09	8254.37	3535.17	7106.6	5033.94	3883.61	4569.89	1527.38	1744.36	975.993
ENSMUSG00000033885.15	Pxk	2343.36	0.895045	0.137965	6.48749	8.72764e-11	1.95226e-09	1618.39	1897.59	1577.55	2282.81	2166.1	2096.89	3360.23	2869.73	3220.99
ENSMUSG00000061175.11	Fnip2	14250.3	-1.45471	0.224296	-6.48566	8.83433e-11	1.97382e-09	25891.2	20015.9	25823.1	12727.6	8580.25	9044.28	7710.4	10464.5	7995.64
ENSMUSG00000025089.15	Gfra1	67.2298	6.72321	1.03747	6.48037	9.14999e-11	2.04197e-09	2.00544	4.56152	0	10.2619	50.4936	13.6415	75.5921	359.88	88.6319
ENSMUSG00000053835.17	H2-T24	3263.94	1.93952	0.299353	6.47906	9.22966e-11	2.05735e-09	954.587	2013.91	979.885	2976.89	4013.87	3335.34	5399.14	4531.95	5169.85
ENSMUSG00000109967.1	RP23-220F20.4	198.865	-1.6821	0.259726	-6.47644	9.39099e-11	2.09089e-09	318.864	303.341	336.358	147.398	218.074	167.595	74.5566	128.71	94.8882
ENSMUSG00000033790.11	Tubgcp5	1126.02	-1.07652	0.166455	-6.46732	9.97539e-11	2.21842e-09	1711.64	1487.05	1792.98	805.094	1039.87	927.619	709.323	853.551	807.071
ENSMUSG00000099241.2	RP24-196H4.1	51.7895	4.7509	0.73471	6.46636	1.00394e-10	2.23006e-09	3.00815	9.12303	1.38991	87.6928	35.126	38.9756	155.326	49.9598	85.5037
ENSMUSG00000091366.1	RP23-115A1.9	66.3573	5.25994	0.813539	6.4655	1.00964e-10	2.24014e-09	5.01359	0	1.38991	148.331	58.5433	106.208	132.545	30.484	114.7
ENSMUSG00000024472.9	Dcp2	4476.79	1.2059	0.186524	6.46514	1.01208e-10	2.24295e-09	2131.78	2559.01	2184.93	5744.81	7031.78	4793.02	5488.2	5591.27	4766.31
ENSMUSG00000009772.15	Nuak2	2274.86	1.78169	0.275725	6.46183	1.03441e-10	2.2898e-09	997.704	777.738	1063.97	3134.55	1796.55	2923.17	3769.25	2404	3606.8
ENSMUSG00000069893.10	9930111J21Rik1	1437.09	1.51778	0.235167	6.45407	1.08883e-10	2.40749e-09	745.019	684.227	594.88	2183.92	1345.76	1587.28	2328.86	1730.81	1733.01
ENSMUSG00000029780.14	Nt5c3	3026.28	2.12382	0.329221	6.45106	1.11074e-10	2.45309e-09	1024.78	1236.17	729.007	3015.14	5242.55	2979.68	4087.15	5837.68	3084.39
ENSMUSG00000074607.11	Tox2	170.091	-1.41223	0.219037	-6.44749	1.13721e-10	2.50866e-09	261.709	193.864	255.743	183.782	208.56	156.877	93.1958	86.3712	90.7173
ENSMUSG00000073418.4	C4b	631.395	2.76037	0.428715	6.43871	1.2049e-10	2.65494e-09	259.704	164.215	145.245	641.836	270.763	339.088	1995.43	771.414	1094.86
ENSMUSG00000037270.18	RP23-243E17.1	6306.7	1.01667	0.15795	6.43666	1.22129e-10	2.68796e-09	3223.74	4217.12	4418.52	6990.23	7013.48	6907.45	8088.36	7462.65	8438.8
ENSMUSG00000116505.1	RP23-414K1.5	183.489	1.23176	0.191375	6.43636	1.22371e-10	2.69019e-09	102.277	116.319	123.007	170.721	161.726	175.39	261.984	298.065	241.913
ENSMUSG00000067642.11	Adgrf3	41.2216	6.85577	1.06521	6.43608	1.226e-10	2.69215e-09	1.00272	2.28076	0	39.1819	30.0034	42.8731	120.119	40.6453	94.8882
ENSMUSG00000030256.11	Bhlhe41	1770.72	-2.22485	0.346007	-6.43007	1.27544e-10	2.7975e-09	4975.49	2695.86	4156.52	662.36	280.276	634.328	897.786	707.906	925.942
ENSMUSG00000010277.7	RP23-185A18.9	30566.2	0.992062	0.154305	6.42921	1.28267e-10	2.81015e-09	17491.4	19625.9	21424	35338.3	30967.9	33803.5	42943.6	33691.6	39809.3
ENSMUSG00000028266.17	Lmo4	2030.13	1.80353	0.280598	6.42745	1.29763e-10	2.83967e-09	977.65	1101.61	656.731	2035.59	2043.16	1926.37	4395.73	2338.8	2795.55
ENSMUSG00000038167.6	Plekhg6	275.271	2.96209	0.460899	6.42676	1.30351e-10	2.8493e-09	74.2011	38.7729	57.6812	436.598	142.699	379.037	633.731	268.428	446.288
ENSMUSG00000024079.4	Eif2ak2	8742.81	1.91016	0.297291	6.42522	1.31678e-10	2.87503e-09	2553.92	4632.22	2058.45	11708.8	13126.1	9903.69	12700.5	11900.6	10100.9
ENSMUSG00000034614.14	Pik3ip1	417.235	2.03248	0.316509	6.42155	1.34894e-10	2.94188e-09	130.353	91.2303	171.654	523.358	423.707	781.46	426.63	580.042	626.68
ENSMUSG00000009418.15	Nav1	4600.11	-1.69794	0.264736	-6.4137	1.42026e-10	3.0939e-09	5258.25	5818.21	8453.42	5456.54	4701.76	5692.38	1390.69	2329.48	2300.26
ENSMUSG00000076240.1	Mir702	328.29	1.71166	0.267032	6.40997	1.45548e-10	3.16704e-09	148.402	111.757	190.417	309.723	289.057	405.346	531.216	392.058	576.629
ENSMUSG00000022807.9	Osbpl11	3673.75	-1.59632	0.249082	-6.40883	1.46642e-10	3.18723e-09	7150.38	4794.15	5709.05	4244.7	2358.56	2967.02	1917.76	2007.71	1914.45
ENSMUSG00000033792.12	Atp7a	5277.34	1.59314	0.248641	6.40739	1.48033e-10	3.21381e-09	2318.28	2107.42	2389.25	7737.49	5504.53	6869.45	8844.28	4745.34	6980.02
ENSMUSG00000030199.16	Etv6	5786.05	1.9188	0.299533	6.40597	1.49413e-10	3.2401e-09	2647.18	1683.2	2383.69	8020.16	4943.98	6989.3	11329.5	5886.79	8190.63
ENSMUSG00000026110.15	Mgat4a	3018.39	1.47842	0.231045	6.39882	1.56579e-10	3.38475e-09	1406.81	1512.14	1688.04	3067.38	3645.05	3004.04	5576.21	3131.38	4134.42
ENSMUSG00000034522.10	Zfp395	728.859	-2.18069	0.340796	-6.39879	1.56613e-10	3.38475e-09	1502.07	1288.63	1739.47	332.113	279.544	418.987	172.93	472.502	353.485
ENSMUSG00000090290.2	RP23-109A22.2	180.724	-1.4688	0.229532	-6.39913	1.56269e-10	3.38475e-09	266.723	221.234	347.477	169.788	171.971	144.21	97.3378	102.46	105.316
ENSMUSG00000015501.10	Hivep2	1775.9	2.44218	0.38239	6.38663	1.69582e-10	3.66091e-09	618.677	501.767	535.114	2203.51	1200.87	1919.55	4609.05	1480.17	2914.42
ENSMUSG00000108732.1	RP24-67F19.6	356.927	1.30281	0.204001	6.38629	1.69964e-10	3.66503e-09	217.59	180.18	248.793	324.65	364.432	263.085	577.814	543.631	492.168
ENSMUSG00000024644.16	Cndp2	31494.6	0.871441	0.136584	6.38026	1.76789e-10	3.80793e-09	20989.9	25113.4	20263.5	30535.7	33931.7	31227.2	40468.7	42622.5	38298.4
ENSMUSG00000106468.1	Gm47282	48.8493	-2.02468	0.317361	-6.37973	1.77399e-10	3.81676e-09	96.2609	79.8265	102.158	31.7187	27.808	32.1549	28.9942	17.7823	22.94
ENSMUSG00000015850.11	Adamtsl4	603.028	2.67744	0.419985	6.37509	1.82855e-10	3.92975e-09	102.277	93.5111	179.993	975.815	518.84	1130.29	907.106	431.856	1087.57
ENSMUSG00000026814.16	Eng	2236.87	1.17157	0.183808	6.37388	1.84308e-10	3.95652e-09	1445.92	1279.51	1738.08	1958.16	1602.62	2031.6	3267.03	3050.94	3757.99
ENSMUSG00000027835.11	Pdcd10	1892.45	1.33309	0.209397	6.36634	1.93594e-10	4.15123e-09	1071.91	1306.87	923.594	1518.76	2180	1733.44	3068.21	2775.73	2453.54
ENSMUSG00000031627.9	Irf2	4130.88	1.43652	0.225704	6.3646	1.95797e-10	4.19377e-09	2368.42	2107.42	2254.43	4737.27	3214.02	4272.7	7060.1	4537.03	6626.54
ENSMUSG00000023008.18	Fmnl3	5151.4	1.22791	0.193003	6.36215	1.98948e-10	4.25599e-09	2301.24	2572.7	2972.32	6892.28	5695.53	7543.72	6246.19	5145.02	6993.58
ENSMUSG00000060301.6	RP24-372E2.1	341.444	-1.27135	0.199835	-6.362	1.99145e-10	4.25599e-09	488.324	431.063	527.47	299.461	323.452	401.448	172.93	201.533	227.315
ENSMUSG00000024174.8	Pot1b	589.192	-1.90221	0.299059	-6.36066	2.00894e-10	4.28503e-09	1032.8	647.735	1199.49	645.568	395.899	608.019	288.907	200.686	283.622
ENSMUSG00000029084.5	Cd38	258.721	3.81834	0.600311	6.36061	2.00952e-10	4.28503e-09	65.1767	27.3691	26.4082	243.487	128.063	146.158	1160.81	228.63	302.391
ENSMUSG00000005043.13	Sgsh	4274.24	-1.49343	0.234887	-6.35811	2.04256e-10	4.35065e-09	6320.13	4919.6	7202.5	4972.37	3267.45	5233.45	1942.61	2265.98	2344.05
ENSMUSG00000061411.12	Nol4l	640.148	-1.42582	0.224315	-6.35635	2.06598e-10	4.39566e-09	1099.98	1227.05	1404.5	213.634	169.775	257.239	368.641	497.058	523.449
ENSMUSG00000026031.15	Cflar	8704.04	1.9906	0.313213	6.35541	2.0787e-10	4.41782e-09	3784.26	3398.33	3964.02	8988.51	6771.26	7124.74	21254.9	8192.57	14857.8
ENSMUSG00000014602.15	Kif1a	69.3538	3.82572	0.602491	6.34983	2.15547e-10	4.57591e-09	14.0381	4.56152	7.64449	111.948	35.126	60.4121	207.102	72.8228	110.529
ENSMUSG00000098996.1	Mir7676-1	223.088	2.07014	0.326154	6.34713	2.19366e-10	4.65183e-09	69.1875	84.388	103.548	268.676	178.557	218.263	503.257	243.025	338.887
ENSMUSG00000022285.17	Ywhaz	5210.53	1.05628	0.166423	6.34694	2.19641e-10	4.6525e-09	3498.48	4059.75	3294.78	4416.36	4942.51	4131.41	8687.92	6775.06	7088.46
ENSMUSG00000000555.8	Itga5	9208.4	1.44871	0.228388	6.34321	2.25025e-10	4.76129e-09	3824.37	5143.11	4888.3	10319.8	9991.87	10894.6	15999.6	9196.84	12617
ENSMUSG00000076309.2	Mir147	82.2018	4.58545	0.723369	6.33902	2.31236e-10	4.88732e-09	2.00544	15.9653	6.94954	26.1212	107.573	42.8731	123.226	315.001	100.102
ENSMUSG00000037816.10	Fbxw17	2368.68	1.61498	0.254792	6.33843	2.32112e-10	4.90043e-09	924.506	1664.95	850.623	2488.05	2481.5	2413.56	3600.46	3429.45	3464.99
ENSMUSG00000035673.10	Sbno2	17135.4	1.64102	0.258911	6.33814	2.32563e-10	4.90454e-09	6796.42	5834.18	7766.8	28598.1	17478.8	24112.2	24915.4	15341.9	23374.8
ENSMUSG00000030041.9	M1ap	180.666	-1.58615	0.250321	-6.33645	2.35126e-10	4.95314e-09	287.78	346.675	285.626	116.613	168.312	116.927	88.0182	125.323	90.7173
ENSMUSG00000074282.10	Zfp94	69.1361	-1.73123	0.273232	-6.33612	2.35622e-10	4.95814e-09	112.304	98.0726	107.718	65.3031	60.7386	81.8487	27.9587	33.8711	34.41
ENSMUSG00000030207.15	Fam234b	436.522	-1.60894	0.253976	-6.33503	2.37298e-10	4.98795e-09	578.568	572.47	891.626	367.563	351.26	494.99	211.244	202.38	258.597
ENSMUSG00000074802.11	Gas2l3	2360.3	-1.24087	0.195952	-6.3325	2.41215e-10	5.06472e-09	4067.02	3209.03	3868.11	2015.07	1868.99	1496.66	1781.07	1629.2	1307.58
ENSMUSG00000034312.14	Iqsec1	2811.29	-1.54131	0.243872	-6.32015	2.61311e-10	5.48066e-09	4453.07	3852.2	5209.37	2980.62	1717.51	2443.77	1301.63	1575.01	1768.47
ENSMUSG00000026489.13	Adck3	199.565	-2.57179	0.4071	-6.31733	2.6612e-10	5.57543e-09	399.082	175.618	444.77	230.427	116.355	257.239	67.3081	54.1937	51.0937
ENSMUSG00000025730.14	Rab40c	956.368	-1.3309	0.210683	-6.31707	2.66562e-10	5.5786e-09	1599.34	1667.23	1574.07	561.607	563.479	719.099	481.512	766.333	674.645
ENSMUSG00000022744.12	Cldnd1	1337.65	1.28838	0.204081	6.31308	2.73527e-10	5.71812e-09	715.941	659.139	823.52	1279.01	1522.12	1654.51	2065.84	1415.81	1902.98
ENSMUSG00000047832.9	Cdca4	1374.06	1.10193	0.174604	6.31102	2.77208e-10	5.78876e-09	865.346	1053.71	790.857	1242.62	1444.55	1176.09	2146.61	1832.43	1814.35
ENSMUSG00000064105.12	Cnnm2	323.095	-1.99826	0.316885	-6.30594	2.86446e-10	5.97515e-09	538.46	360.36	726.227	312.522	222.464	339.088	104.586	132.097	172.05
ENSMUSG00000040479.11	Dgkz	7843.01	-0.994951	0.157793	-6.30542	2.87418e-10	5.98892e-09	11235.5	9900.77	12021.3	7807.45	6380.48	6601.49	5067.78	6181.47	5390.9
ENSMUSG00000032307.16	Ube2q2	1240.79	-1.18674	0.188226	-6.30486	2.8845e-10	6.00389e-09	2166.87	1546.35	1643.57	1264.08	1057.44	1132.24	840.833	690.97	824.798
ENSMUSG00000020593.15	Lpin1	694.124	-2.61096	0.414367	-6.30109	2.95568e-10	6.14537e-09	1491.04	686.508	1453.84	1007.53	337.356	675.252	214.35	154.96	226.272
ENSMUSG00000006262.15	Mob1b	2935.26	0.909239	0.144333	6.29957	2.98466e-10	6.19891e-09	1834.97	2048.12	1915.99	3314.6	3211.83	3208.66	4118.22	3137.31	3627.65
ENSMUSG00000105283.1	RP24-142B15.5	151.142	2.46755	0.392254	6.29071	3.16023e-10	6.55645e-09	30.0815	68.4227	31.9679	135.271	235.637	172.467	201.924	312.461	172.05
ENSMUSG00000019823.17	Mical1	1782.28	-2.32814	0.370859	-6.27771	3.43595e-10	7.12078e-09	2362.4	3977.64	3137.72	1070.97	2087.8	1518.1	356.215	910.285	619.38
ENSMUSG00000018143.10	Mafk	3136.92	1.55286	0.247426	6.27605	3.47282e-10	7.1894e-09	1500.07	1133.54	1166.13	5609.54	3396.97	4269.77	4510.68	3058.56	3586.98
ENSMUSG00000003948.17	Mmd	679.522	-1.58353	0.252425	-6.27325	3.53595e-10	7.31142e-09	1029.79	998.972	1206.44	459.92	692.274	648.943	265.09	455.566	358.698
ENSMUSG00000040430.18	Pitpnc1	1078.73	-1.91496	0.305273	-6.27293	3.5432e-10	7.31142e-09	1988.39	1113.01	1592.83	1643.77	965.964	1157.57	423.523	307.38	516.15
ENSMUSG00000068749.9	Psma5	2065.11	1.344	0.214248	6.27309	3.53941e-10	7.31142e-09	1201.26	1432.32	1025.06	1646.57	2348.32	1665.23	3473.1	2993.36	2800.77
ENSMUSG00000111737.1	RP24-125B17.2	596.498	1.20099	0.191525	6.27069	3.59443e-10	7.40917e-09	259.704	362.641	290.491	697.81	846.682	832.129	650.299	643.55	785.174
ENSMUSG00000022504.10	Ciita	1785.45	3.34008	0.532729	6.26975	3.61634e-10	7.44632e-09	580.574	134.565	531.64	990.742	321.256	837.975	5413.64	2522.55	4736.07
ENSMUSG00000002814.15	Top3a	1903.46	1.08659	0.173396	6.26654	3.69162e-10	7.59318e-09	951.579	1033.18	1013.94	2733.4	2763.97	2270.33	2459.33	2129.64	1775.77
ENSMUSG00000005413.8	Hmox1	7794.17	-1.83856	0.293493	-6.2644	3.74261e-10	7.6898e-09	16118.7	11235	9756.46	9665.79	6898.59	6096.75	4407.12	3485.33	2483.78
ENSMUSG00000026875.14	Traf1	425.209	2.62913	0.41989	6.26147	3.81356e-10	7.82718e-09	159.432	164.215	168.179	136.204	70.2519	84.7719	1615.39	455.566	972.865
ENSMUSG00000032333.6	Stoml1	1719.02	1.17213	0.187209	6.26106	3.82378e-10	7.83977e-09	1022.77	814.231	945.832	2335.05	1678	2390.18	2186.99	2004.32	2093.8
ENSMUSG00000097722.1	Gm26841	1059.6	1.29106	0.206335	6.2571	3.92204e-10	8.03263e-09	584.585	574.751	698.429	1049.51	896.444	1175.11	1745.87	1196.5	1615.19
ENSMUSG00000054855.13	Rnd1	160.795	2.70364	0.432473	6.2516	4.06278e-10	8.31201e-09	32.087	31.9306	31.9679	297.596	192.461	234.828	311.688	91.4519	223.144
ENSMUSG00000021196.14	Pfkp	7323.14	2.23938	0.358363	6.24892	4.13291e-10	8.44468e-09	2014.46	4848.89	2114.74	4357.58	6378.29	3844.94	16885	12838	12626.4
ENSMUSG00000030750.13	Nsmce1	1229.73	1.34855	0.21581	6.24879	4.13644e-10	8.44468e-09	605.642	846.161	512.181	1223.03	1508.95	1403.12	1551.19	1823.96	1593.29
ENSMUSG00000037318.10	Traf3ip3	962.511	-1.64352	0.263074	-6.24738	4.17396e-10	8.51221e-09	1354.67	1532.67	1754.06	661.427	864.245	1010.44	341.718	610.526	532.834
ENSMUSG00000031441.15	Atp11a	5795.7	1.47734	0.236555	6.24522	4.23194e-10	8.61419e-09	2974.06	3131.48	3803.48	5404.3	4171.21	5077.54	11604.9	6637.88	9356.4
ENSMUSG00000049307.6	Fut4	473.491	1.37162	0.219629	6.24519	4.23295e-10	8.61419e-09	286.777	246.322	341.917	317.187	360.773	427.757	620.27	867.946	792.473
ENSMUSG00000027078.14	Ube2l6	4541.29	2.12535	0.340388	6.24389	4.26829e-10	8.67689e-09	1584.29	2866.91	1029.23	3522.64	4746.39	3255.44	8692.06	7814.06	7360.62
ENSMUSG00000022947.8	Cbr3	271.552	-1.5743	0.252195	-6.24239	4.30945e-10	8.75128e-09	474.286	335.271	374.58	315.321	239.296	306.933	97.3378	154.96	145.982
ENSMUSG00000051439.6	Cd14	13950.4	-0.841728	0.134858	-6.24158	4.33166e-10	8.78708e-09	17801.3	18547.1	18455.9	12372.1	12404.6	15393.4	10518.7	9721	10339.7
ENSMUSG00000044700.15	Tmem201	149.162	-1.60833	0.257714	-6.24073	4.35524e-10	8.82557e-09	219.595	168.776	247.404	200.574	130.991	164.672	67.3081	75.3631	67.7773
ENSMUSG00000049130.6	C5ar1	7628.41	-1.03335	0.165747	-6.23446	4.53333e-10	9.17675e-09	12023.6	13312.8	13279.2	3556.22	3917.28	3699.76	7619.27	5520.99	5726.66
ENSMUSG00000046034.8	Otulin	1616.41	-0.808608	0.129812	-6.22905	4.69271e-10	9.48937e-09	2340.34	1997.94	2099.46	1421.74	1612.87	1396.3	1227.08	1241.38	1210.61
ENSMUSG00000044229.9	Nxpe4	185.264	-1.22458	0.196656	-6.22702	4.75387e-10	9.60292e-09	249.677	253.164	266.862	197.775	185.875	185.134	115.977	125.323	87.5892
ENSMUSG00000022358.7	Fbxo32	168.583	-2.75101	0.441879	-6.2257	4.79407e-10	9.67393e-09	323.878	164.215	471.179	125.942	109.769	179.288	24.8522	61.8147	56.3073
ENSMUSG00000040209.12	Zfp704	3441.08	-1.68619	0.27094	-6.22348	4.86235e-10	9.80138e-09	4904.29	4018.7	5816.07	4765.26	2648.35	4234.7	1387.58	1307.42	1887.34
ENSMUSG00000001741.12	Il16	1304.48	-1.97179	0.316955	-6.22103	4.93887e-10	9.94518e-09	2885.82	1783.55	3215.55	549.479	478.591	815.564	472.192	705.365	834.182
ENSMUSG00000013483.14	Card14	1101.73	-1.55904	0.250646	-6.22009	4.96886e-10	9.99506e-09	1685.57	1272.66	1918.07	1189.45	811.556	1380.71	497.044	541.09	619.38
ENSMUSG00000021067.8	Sav1	4277.36	1.29903	0.208918	6.21789	5.03888e-10	1.01253e-08	2272.16	1970.57	2129.34	5971.5	5549.17	4915.79	6751.52	4217.8	4718.34
ENSMUSG00000027613.15	Eif6	2866.6	0.999688	0.160962	6.2107	5.27488e-10	1.05884e-08	2200.97	2175.84	1708.2	2601.86	2635.91	2323.92	4471.33	3926.5	3754.86
ENSMUSG00000026648.18	Dclre1c	1745.65	-1.23322	0.198818	-6.20276	5.54822e-10	1.11255e-08	2477.72	2043.56	3210.69	1730.53	1432.85	1522	1067.61	1172.79	1053.16
ENSMUSG00000020694.17	Tlk2	2538.03	1.01138	0.163058	6.20253	5.55609e-10	1.11296e-08	1575.27	1669.51	1446.2	2919.05	3259.4	2527.57	3548.69	3028.07	2868.54
ENSMUSG00000021918.10	Nek4	288.105	-1.02766	0.165835	-6.19685	5.7604e-10	1.15268e-08	364.989	383.167	370.41	310.656	289.789	327.395	178.107	205.767	162.666
ENSMUSG00000068417.8	Pnp2	118.69	4.1878	0.675961	6.19533	5.81622e-10	1.16264e-08	11.0299	18.2461	6.94954	86.7599	249.541	72.1048	172.93	377.663	72.991
ENSMUSG00000020919.11	Stat5b	4677.42	1.09939	0.177464	6.19502	5.82767e-10	1.16371e-08	2546.9	2098.3	2780.51	7202	5220.6	6315.99	5435.39	5195.82	5301.23
ENSMUSG00000061878.15	Sphk1	71.9585	3.78245	0.610878	6.19183	5.94702e-10	1.18631e-08	3.00815	9.12303	6.25458	205.238	101.719	86.7207	109.764	87.218	38.5809
ENSMUSG00000005893.14	Nr2c2	1858.71	-1.21827	0.196826	-6.18958	6.03234e-10	1.20201e-08	2314.27	2766.56	2886.84	1626.98	1890.22	1820.16	877.076	1271.01	1275.26
ENSMUSG00000086851.1	RP23-188H3.3	86.6924	-2.74309	0.44319	-6.18943	6.03827e-10	1.20201e-08	126.342	75.265	177.908	131.539	64.3976	147.133	21.7457	16.0888	19.8118
ENSMUSG00000036478.8	Btg1	7691.67	1.86026	0.300724	6.18593	6.17355e-10	1.22766e-08	3407.24	3418.86	3930.66	7271.97	5507.46	6627.8	18384.4	7487.2	13189.5
ENSMUSG00000044313.13	Mab21l3	76.0739	5.16897	0.83563	6.18571	6.18224e-10	1.22812e-08	13.0353	0	3.47477	13.0606	8.0497	2.92317	446.304	77.9035	119.914
ENSMUSG00000021245.15	Mlh3	443.964	-1.00201	0.162176	-6.17852	6.47062e-10	1.28408e-08	649.761	506.328	609.474	440.33	439.074	463.809	279.587	281.977	325.331
ENSMUSG00000051615.14	Rap2a	4683.3	-0.88783	0.143737	-6.17679	6.54179e-10	1.29686e-08	6209.83	5332.41	5688.89	5942.58	4641.75	5019.08	3097.21	3162.71	3055.19
ENSMUSG00000111497.1	RP23-186O3.11	3173.69	0.873917	0.141506	6.17584	6.58107e-10	1.3033e-08	2502.78	2522.52	2338.52	2762.32	2625.67	2321	4934.2	4007.8	4548.38
ENSMUSG00000026430.16	Rassf5	1765.45	-0.938261	0.151978	-6.17365	6.67327e-10	1.32019e-08	2726.39	2367.43	2724.91	1283.67	1413.09	1290.09	1163.91	1478.47	1441.05
ENSMUSG00000030220.13	Arhgdib	18242.5	0.81606	0.132255	6.17035	6.81383e-10	1.34522e-08	13196.8	14665.3	11896.9	18265.3	17846.9	18334.1	25148.4	21548.8	23279.9
ENSMUSG00000035735.10	Dagla	179.244	-1.49394	0.24211	-6.17048	6.80819e-10	1.34522e-08	220.598	307.902	292.576	151.13	160.262	190.98	75.5921	110.928	103.23
ENSMUSG00000035578.16	Iqcg	1896.03	0.933809	0.151343	6.17015	6.82255e-10	1.34556e-08	1283.48	1281.79	1420.49	1944.17	1782.64	1728.57	2854.9	2190.61	2577.62
ENSMUSG00000018425.18	Dhx40	813.648	-1.38197	0.224029	-6.16872	6.88442e-10	1.35636e-08	1322.58	946.515	1403.11	735.126	657.148	844.796	541.571	381.896	490.082
ENSMUSG00000003546.9	Klc4	2116.34	-1.29704	0.210388	-6.16498	7.04925e-10	1.38741e-08	3014.17	2919.37	3102.27	2022.53	1921.68	2390.18	887.431	1427.67	1361.8
ENSMUSG00000032802.8	Srxn1	1878.97	-1.35545	0.220006	-6.16097	7.22991e-10	1.42061e-08	3160.57	2951.3	2248.18	1808.9	1918.02	1559.02	1168.05	1262.54	834.182
ENSMUSG00000033863.1	Klf9	285.347	-1.60099	0.259862	-6.16091	7.23275e-10	1.42061e-08	443.201	364.921	400.988	355.436	285.398	317.651	181.214	93.1455	126.17
ENSMUSG00000022372.14	Sla	789.104	-2.02097	0.328088	-6.15983	7.28253e-10	1.42893e-08	1209.28	1258.98	1177.95	740.724	1120.37	697.663	186.392	453.026	257.554
ENSMUSG00000045868.12	Gvin1	396.843	2.92677	0.475175	6.15936	7.30413e-10	1.4317e-08	67.1821	168.776	36.8326	487.908	375.409	418.013	832.549	403.913	781.003
ENSMUSG00000021822.3	Plau	3532.93	2.07347	0.336723	6.15779	7.37679e-10	1.44446e-08	2022.48	2130.23	1273.16	1564.48	1013.53	971.466	10572.5	7459.26	4789.25
ENSMUSG00000024601.8	Isoc1	2824.1	1.41223	0.229393	6.15636	7.44354e-10	1.45605e-08	1592.32	1854.26	1155.71	2679.29	3431.37	2478.85	4603.87	4060.3	3560.92
ENSMUSG00000036636.9	Clcn7	22025.9	1.37054	0.222896	6.14881	7.80661e-10	1.52551e-08	12364.5	11994.5	15041.6	21204.9	14678.3	21059.5	39739.7	27040.1	35109.7
ENSMUSG00000076012.1	Mir705	221.545	-1.98849	0.323656	-6.14384	8.05513e-10	1.57247e-08	413.12	291.937	453.805	199.641	133.186	209.494	60.0595	121.089	111.572
ENSMUSG00000031207.16	Msn	44364.2	0.947111	0.154244	6.14034	8.23446e-10	1.60446e-08	26575	34213.7	31120	42675.6	44553.6	42954	65223.6	51849	60113.3
ENSMUSG00000052302.6	Tbc1d30	514.757	3.30282	0.53789	6.14032	8.23571e-10	1.60446e-08	101.275	91.2303	148.72	450.591	160.994	296.214	2018.21	380.203	985.378
ENSMUSG00000036103.8	Colec12	988.622	-0.935785	0.152424	-6.13935	8.28609e-10	1.61263e-08	1335.62	1140.38	1196.71	1185.72	1009.87	1105.93	714.501	584.276	624.594
ENSMUSG00000054051.7	Ercc6	489.612	-0.97648	0.159183	-6.13432	8.55228e-10	1.66275e-08	654.775	768.615	729.701	417.94	376.872	365.396	382.103	320.082	391.023
ENSMUSG00000071713.6	Csf2rb	24935.2	1.89852	0.309651	6.13117	8.72333e-10	1.69429e-08	10136.5	6748.76	10613.3	38874.9	20240.6	35258.3	42804.8	25324.6	34415.2
ENSMUSG00000035458.15	Tnni3	139.971	2.31363	0.377368	6.13097	8.73472e-10	1.69478e-08	68.1848	27.3691	47.2569	157.66	90.0103	138.363	313.759	171.049	246.084
ENSMUSG00000042901.10	Aida	3208.85	1.57482	0.256915	6.12972	8.80328e-10	1.70636e-08	1715.65	2278.48	1206.44	2710.08	3168.65	2338.53	6024.59	4791.91	4645.35
ENSMUSG00000038884.14	RP23-349D13.3	811.872	1.17227	0.191329	6.12701	8.95441e-10	1.7339e-08	386.046	501.767	573.337	863.867	780.821	906.182	1003.41	1088.11	1203.31
ENSMUSG00000050014.8	Apol10b	22.9494	8.2201	1.34187	6.12586	9.01968e-10	1.74478e-08	0	0	0	7.46321	2.92716	3.89756	118.048	39.7985	34.41
ENSMUSG00000043085.14	Tmem82	188.654	-1.35749	0.22162	-6.12529	9.05193e-10	1.74925e-08	242.658	305.622	307.17	137.137	175.63	196.827	100.444	117.702	114.7
ENSMUSG00000029553.10	Tfec	5119.91	1.45038	0.236862	6.12332	9.1647e-10	1.76926e-08	1769.8	1972.86	1403.11	9538.92	9026.64	8321.29	6253.44	3853.68	3939.43
ENSMUSG00000019822.12	Smpd2	897.419	-1.45187	0.237385	-6.11612	9.58827e-10	1.84917e-08	1178.19	1290.91	1544.19	707.139	874.49	1014.34	362.428	532.623	572.458
ENSMUSG00000030068.4	RP23-133N21.3	318.09	1.34625	0.220144	6.11532	9.63629e-10	1.85656e-08	239.65	182.461	159.144	300.394	248.809	253.341	551.926	427.622	499.467
ENSMUSG00000020623.11	Map2k6	118.85	-1.60119	0.261998	-6.11143	9.87428e-10	1.9005e-08	116.315	123.161	159.839	180.983	169.775	187.083	33.1363	48.2663	51.0937
ENSMUSG00000056687.9	RP23-12N20.1	945.885	1.50389	0.246375	6.10407	1.03404e-09	1.98822e-08	606.644	421.94	464.924	1172.66	781.552	818.487	1721.02	1265.08	1260.66
ENSMUSG00000021384.14	Susd3	1690.03	-2.09405	0.343119	-6.103	1.04099e-09	1.99957e-08	3253.82	2367.43	4030.04	1009.4	746.427	1541.48	504.293	768.873	988.506
ENSMUSG00000078763.2	Slfn1	524.414	3.53395	0.57937	6.09964	1.06304e-09	2.03989e-08	82.2229	136.845	18.0688	553.211	870.099	367.345	907.106	1254.08	530.749
ENSMUSG00000066361.3	Serpina3c	99.3915	10.0705	1.65165	6.09726	1.07903e-09	2.0685e-08	0	0	0	114.747	7.31791	79.8999	429.736	143.952	118.871
ENSMUSG00000041763.14	Tpp2	8474.78	0.836246	0.137164	6.09669	1.0829e-09	2.07384e-08	4962.45	5790.84	4981.43	11042.8	11301	10120	10280.5	8611.72	9182.26
ENSMUSG00000020057.2	Dram1	6914.74	2.67572	0.438917	6.09618	1.08635e-09	2.07837e-08	2317.28	1539.51	2494.19	6064.79	2792.51	6425.12	19050.3	5817.36	15731.6
ENSMUSG00000030872.14	Gga2	3668.13	-0.823395	0.135118	-6.09389	1.10198e-09	2.10491e-08	4773.94	3963.96	4976.56	3831.43	3738.72	3970.64	2458.3	2710.53	2589.09
ENSMUSG00000037580.10	Gch1	1582.45	2.01018	0.329872	6.09383	1.10241e-09	2.10491e-08	678.84	832.477	387.784	1739.86	1794.35	1184.86	3369.55	2356.58	1897.76
ENSMUSG00000085465.1	AC134581.2	259.447	1.52354	0.250064	6.09258	1.11103e-09	2.11924e-08	136.37	157.372	143.855	240.689	179.289	224.11	539.5	321.775	392.066
ENSMUSG00000006818.4	Sod2	9504.91	3.05855	0.502056	6.09206	1.11468e-09	2.12409e-08	3278.89	1528.11	1610.9	13039.2	5505.99	7097.45	31240.3	7917.36	14326
ENSMUSG00000029366.10	Dck	10040.2	2.27819	0.374039	6.09079	1.12356e-09	2.13889e-08	2008.44	4684.68	1670.67	12117.5	17112.9	12245.2	12431.3	16745.9	11344.9
ENSMUSG00000090230.1	RP24-535C14.4	26.1479	2.9582	0.485911	6.08795	1.14367e-09	2.17502e-08	5.01359	11.4038	4.86468	26.1212	21.9537	22.411	53.8465	44.8792	44.8373
ENSMUSG00000044468.14	Fam46c	5806.15	2.13925	0.351428	6.0873	1.14832e-09	2.18169e-08	1834.97	1753.9	1399.64	10889.8	7683.8	6722.31	11682.6	4538.72	5749.6
ENSMUSG00000044948.16	Cfap43	976.17	0.973702	0.159993	6.0859	1.15842e-09	2.19871e-08	595.614	713.877	797.807	779.906	849.609	908.131	1373.08	1436.98	1330.52
ENSMUSG00000062901.3	Klhl24	4609.38	-2.14776	0.353442	-6.0767	1.22678e-09	2.32616e-08	7697.87	5122.58	10315.2	4645.85	2945.46	5534.53	1833.89	1121.13	2267.93
ENSMUSG00000026103.14	Gls	9458.57	1.32258	0.21768	6.07581	1.23361e-09	2.33678e-08	4999.55	5553.65	5795.22	8262.71	9640.61	9984.57	17174.9	9985.19	13730.6
ENSMUSG00000032220.10	Myo1e	14528	1.83994	0.302912	6.07419	1.24614e-09	2.35819e-08	7666.78	6709.99	5733.37	16344.4	9478.15	12826.9	30892.3	15006.6	26093.2
ENSMUSG00000022641.15	Bbx	4854.41	1.19593	0.197004	6.07058	1.2745e-09	2.40948e-08	2950	2709.54	3865.33	4164.47	3737.99	4419.83	7747.68	6063.77	8031.09
ENSMUSG00000097842.2	RP23-201L15.5	32.326	-2.44097	0.402233	-6.06854	1.29079e-09	2.43788e-08	52.1413	61.5805	63.9357	24.2554	26.3445	30.2061	6.21305	12.7017	13.5555
ENSMUSG00000028902.4	Sf3a3	2134.69	0.810829	0.133662	6.06625	1.30934e-09	2.47048e-08	1432.88	1582.85	1371.14	2392.89	2420.03	2331.71	2820.73	2312.55	2547.38
ENSMUSG00000027429.16	Sec23b	4062.6	1.07377	0.177059	6.06448	1.32383e-09	2.49536e-08	2572.97	3154.29	2626.23	3422.82	3800.19	3419.13	6796.04	4819.85	5951.89
ENSMUSG00000069892.9	9930111J21Rik2	2453.52	1.19818	0.197605	6.06349	1.33196e-09	2.50822e-08	1312.56	1370.74	1066.75	3777.32	2827.64	3134.61	3293.95	2410.77	2887.31
ENSMUSG00000026579.8	F5	111.599	2.09114	0.345102	6.05949	1.36557e-09	2.5686e-08	46.125	31.9306	44.477	149.264	82.6924	115.952	240.238	145.646	148.067
ENSMUSG00000106888.1	RP23-201D22.6	21.9149	-4.36345	0.720119	-6.05935	1.3667e-09	2.5686e-08	64.1739	31.9306	55.5963	14.9264	10.9769	12.6671	1.03551	5.92744	0
ENSMUSG00000021733.10	Slc4a7	3921.09	1.79774	0.29681	6.05687	1.38792e-09	2.60591e-08	1475	1477.93	2202.31	3770.79	4020.46	4404.24	8060.4	3677.55	6201.1
ENSMUSG00000043279.9	Trim56	3801.87	1.01553	0.167845	6.05043	1.44462e-09	2.70972e-08	2309.26	2353.74	2496.27	4722.35	3483.32	4374.03	4955.94	4255.05	5266.82
ENSMUSG00000036580.15	Spg20	1313.66	-0.945546	0.156429	-6.04457	1.49805e-09	2.8072e-08	1951.29	1564.6	1706.11	1387.22	1202.33	1296.91	800.448	952.624	961.395
ENSMUSG00000000440.12	Pparg	1047.42	-1.3964	0.231503	-6.03186	1.62087e-09	3.03439e-08	1926.22	1660.39	1148.06	1026.19	1022.31	846.744	665.832	623.228	507.809
ENSMUSG00000011179.8	Odc1	646.217	1.71251	0.284085	6.02816	1.65832e-09	3.10146e-08	312.848	412.817	214.046	577.466	754.476	492.067	1169.09	1050	833.14
ENSMUSG00000021877.12	Arf4	9145.8	1.50253	0.24949	6.02243	1.71816e-09	3.21024e-08	5694.44	4262.74	4800.05	9647.14	7639.16	8444.06	18147.3	9696.44	13980.9
ENSMUSG00000079334.8	Nat6	725.919	-1.24475	0.206728	-6.02116	1.73168e-09	3.23236e-08	1044.83	1135.82	1059.11	614.782	618.363	694.74	330.327	496.211	539.09
ENSMUSG00000030259.12	Rassf8	712.301	-1.58457	0.263375	-6.01641	1.78329e-09	3.32546e-08	1150.12	1363.89	766.534	681.951	831.314	526.17	358.286	394.598	337.844
ENSMUSG00000008384.8	Sertad1	994.489	1.18779	0.19744	6.01597	1.78816e-09	3.3313e-08	748.028	695.631	549.013	866.666	806.433	754.177	1789.36	1470	1271.09
ENSMUSG00000029649.10	Pomp	4589.94	0.896658	0.14909	6.01422	1.80758e-09	3.3642e-08	3522.55	3510.09	2893.79	4005.88	4802.74	4107.05	6571.34	5999.41	5896.63
ENSMUSG00000028381.8	Ugcg	3679.86	1.57805	0.262426	6.0133	1.81789e-09	3.38012e-08	1149.11	1375.3	1409.37	6216.86	5274.75	5949.62	5535.83	2755.41	3452.47
ENSMUSG00000025212.16	Sfxn3	1639.81	-0.81644	0.135791	-6.01249	1.82695e-09	3.39366e-08	1981.37	2178.12	2150.19	1596.19	1497.98	1773.39	1090.39	1218.51	1272.13
ENSMUSG00000039183.5	Nubp2	2086.99	0.690938	0.114943	6.01114	1.84222e-09	3.41871e-08	1461.96	1555.48	1469.83	2460.06	2397.35	2204.07	2475.9	2490.37	2267.93
ENSMUSG00000099329.1	RP24-271E12.4	331.802	1.14439	0.190557	6.0055	1.90738e-09	3.53621e-08	216.587	241.76	189.027	319.052	344.673	259.188	451.482	513.994	450.458
ENSMUSG00000022329.15	Stk3	1273.32	1.02849	0.171422	5.99975	1.97617e-09	3.66021e-08	886.403	969.322	788.078	1106.42	1184.04	1145.88	2050.31	1486.94	1842.5
ENSMUSG00000022747.17	St3gal6	274.41	2.09165	0.348735	5.99782	1.99979e-09	3.69838e-08	73.1984	141.407	70.8853	232.293	475.664	290.368	433.878	391.211	360.784
ENSMUSG00000031906.9	Smpd3	38.0987	-2.81515	0.469392	-5.99744	2.00449e-09	3.69838e-08	81.2202	70.7035	60.461	44.7793	30.0034	26.3085	5.17754	16.9355	7.2991
ENSMUSG00000038970.7	Lmtk2	1199.29	1.62749	0.271361	5.99752	2.00358e-09	3.69838e-08	333.905	542.82	627.543	1283.67	1557.25	1801.65	1348.23	1431.05	1867.53
ENSMUSG00000107320.1	RP23-23C4.5	96.0185	2.27488	0.379306	5.99748	2.00401e-09	3.69838e-08	14.0381	34.2114	47.9518	92.3573	115.623	89.6438	156.362	148.186	165.794
ENSMUSG00000050017.11	Pitpnb	2775.82	0.847198	0.141292	5.99608	2.0214e-09	3.72599e-08	1982.37	2169	1869.43	2705.41	2840.81	2597.72	4044.7	3238.08	3534.85
ENSMUSG00000032375.15	Aph1b	165.584	-2.07092	0.345559	-5.99296	2.06061e-09	3.79126e-08	209.568	271.41	377.36	88.6257	185.875	152.979	69.3791	78.7503	56.3073
ENSMUSG00000074813.13	RP23-249P4.1	127.213	2.35005	0.392136	5.99294	2.06077e-09	3.79126e-08	37.1006	75.265	23.6284	115.68	120.745	118.876	290.978	181.21	181.435
ENSMUSG00000038527.9	C1rl	193.873	2.25875	0.376955	5.99211	2.07139e-09	3.8035e-08	97.2636	43.3344	64.6307	198.708	139.772	200.724	472.192	209.154	319.075
ENSMUSG00000041645.14	Ddx24	4632.59	0.749994	0.125163	5.99213	2.07113e-09	3.8035e-08	3490.46	3521.49	3357.32	5061.92	4250.24	4576.71	6210.98	5442.24	5781.93
ENSMUSG00000058163.14	RP23-14F5.8	3622.88	1.78748	0.298454	5.98915	2.10941e-09	3.86961e-08	1556.22	1858.82	880.506	5264.36	4516.61	3727.04	6180.95	4451.51	4169.87
ENSMUSG00000024151.13	Msh2	679.415	-1.22509	0.204619	-5.98716	2.1353e-09	3.91336e-08	896.43	750.369	919.424	713.67	873.758	861.36	282.694	403.066	413.963
ENSMUSG00000017009.3	Sdc4	21301.8	2.45635	0.410356	5.98591	2.15178e-09	3.9398e-08	9436.58	6477.35	8178.91	14035.5	9486.2	11861.2	67067.8	17108.3	48064.5
ENSMUSG00000107928.1	RP23-4F16.12	8305.52	1.6349	0.273196	5.98434	2.17266e-09	3.97423e-08	6010.29	4242.21	5062.74	4704.62	3039.86	4112.9	20957.7	11428.9	15190.5
ENSMUSG00000038467.15	Chmp4b	10169.9	1.18171	0.197506	5.98315	2.18862e-09	3.99961e-08	7447.19	6324.54	5540.17	10022.2	10424.4	7964.66	15741.8	15955.8	12108.2
ENSMUSG00000002997.15	Prkar2b	377.479	-1.13808	0.19027	-5.98139	2.21237e-09	4.03916e-08	542.47	376.325	535.114	418.873	415.657	442.373	237.131	208.307	221.058
ENSMUSG00000052296.7	Ppp6r1	10489.3	1.22188	0.204292	5.98102	2.21741e-09	4.0445e-08	7539.44	6306.3	7420.72	8682.52	6368.04	8469.39	18714.7	13142.8	17759.7
ENSMUSG00000027882.18	Stxbp3	3208.09	1.17283	0.196317	5.97418	2.31252e-09	4.21397e-08	2342.35	2155.32	2171.04	2502.98	2333.68	2328.79	6411.87	4017.96	4608.86
ENSMUSG00000041058.15	Wwp1	17980.6	-1.58241	0.265096	-5.96919	2.38435e-09	4.34074e-08	32130.1	19505	29618.2	21462.3	13370.5	18603	10352	7290.75	9493
ENSMUSG00000025766.14	D3Ertd751e	105.139	-1.42526	0.238811	-5.96814	2.39975e-09	4.36463e-08	151.41	134.565	154.28	92.3573	131.722	116.927	54.882	55.8873	54.2219
ENSMUSG00000019843.14	Fyn	2548.09	1.41649	0.237498	5.96424	2.4578e-09	4.46597e-08	1081.93	1877.06	1486.51	1809.83	2684.21	2148.53	3983.6	3938.36	3922.74
ENSMUSG00000051212.8	Gpr183	556.64	-3.06758	0.514494	-5.96233	2.48671e-09	4.51422e-08	1150.12	1612.5	1289.14	104.485	240.759	130.568	61.095	311.614	109.486
ENSMUSG00000021066.9	Atl1	2046.42	1.27268	0.213484	5.96148	2.49967e-09	4.53346e-08	1124.05	898.619	1062.58	2828.56	2619.81	2416.49	3177.98	1960.29	2329.45
ENSMUSG00000030055.16	Rab43	8028.5	1.71295	0.287404	5.96009	2.52094e-09	4.56771e-08	5702.46	3916.06	4768.08	4324.93	2595.66	3771.86	20848.9	11275.7	15052.8
ENSMUSG00000113816.1	RP24-145F3.5	249.831	-1.20252	0.201842	-5.95774	2.55755e-09	4.62968e-08	338.919	307.902	382.92	225.762	261.981	280.624	132.545	140.565	177.264
ENSMUSG00000068463.4	RP24-69M4.1	22.7025	-4.5843	0.771248	-5.944	2.78149e-09	5.0303e-08	66.1794	41.0536	69.4954	7.46321	10.2451	2.92317	1.03551	5.92744	0
ENSMUSG00000048058.17	Ldlrad3	1585.96	-3.0612	0.515248	-5.9412	2.82935e-09	5.11203e-08	2981.08	1040.03	3371.92	2785.64	729.595	2478.85	389.351	212.541	284.665
ENSMUSG00000025795.8	Rassf3	2137.94	-1.66843	0.280972	-5.93807	2.88391e-09	5.20569e-08	3795.29	3628.69	4141.92	1074.7	1643.6	1319.32	786.987	1648.67	1202.27
ENSMUSG00000106664.1	RP23-338P12.3	17.9707	4.60485	0.77592	5.93469	2.94398e-09	5.30414e-08	2.00544	4.56152	0.694954	6.53031	5.12254	8.7695	53.8465	36.4114	43.7946
ENSMUSG00000114046.1	RP24-103K4.5	622.802	1.58393	0.266887	5.93484	2.94133e-09	5.30414e-08	390.057	298.779	305.085	556.942	609.582	458.937	1374.12	776.494	835.225
ENSMUSG00000097816.1	RP24-226D9.2	1741.72	-1.28369	0.216334	-5.93383	2.95943e-09	5.32697e-08	2823.65	2374.27	3000.81	1607.39	1257.95	1242.35	1225.01	1292.18	851.909
ENSMUSG00000116836.1	RP24-100B13.5	106.863	1.5461	0.260721	5.93009	3.02766e-09	5.44468e-08	41.1114	57.019	49.3417	112.881	132.454	147.133	122.19	165.122	134.512
ENSMUSG00000086109.2	RP23-256D19.2	102.654	-2.06603	0.348448	-5.92923	3.04365e-09	5.4683e-08	167.454	130.003	223.08	125.009	60.0068	92.567	45.5624	36.4114	43.7946
ENSMUSG00000053007.9	Creb5	1652.23	1.60435	0.270746	5.92566	3.1105e-09	5.58317e-08	756.049	1081.08	632.408	1738.93	1899.73	1279.37	3126.2	2254.12	2102.14
ENSMUSG00000028527.18	Ak4	66.4464	3.46191	0.584858	5.91923	3.23451e-09	5.80033e-08	19.0516	15.9653	8.33945	33.5845	41.7121	12.6671	178.107	221.856	66.7346
ENSMUSG00000054412.5	RP24-409F22.1	109.215	-1.85079	0.312963	-5.91377	3.34368e-09	5.99051e-08	158.429	164.215	156.365	152.996	124.404	94.5158	26.9232	55.0405	50.0509
ENSMUSG00000029505.17	Ep400	5758.57	0.857081	0.144949	5.91297	3.35986e-09	6.01387e-08	4012.88	4392.74	4916.8	5105.77	4955.69	4306.8	7567.5	8665.07	7903.88
ENSMUSG00000033705.17	Stard9	4880.35	-1.49968	0.253635	-5.91275	3.36442e-09	6.01641e-08	6289.05	6942.63	10675.2	4289.48	3155.48	4114.85	2403.42	2707.99	3345.07
ENSMUSG00000092006.1	RP23-107N10.4	741.024	1.5268	0.25835	5.90981	3.4251e-09	6.11921e-08	348.946	273.691	529.555	663.293	666.661	838.949	1153.56	983.955	1210.61
ENSMUSG00000033102.15	Cdc14b	494.712	-0.931386	0.157629	-5.90873	3.44748e-09	6.15346e-08	568.541	668.262	694.259	466.451	538.598	504.734	311.688	350.566	349.314
ENSMUSG00000060510.14	Zfp266	739.227	-0.954239	0.161521	-5.90783	3.46635e-09	6.18139e-08	947.568	935.111	1118.18	676.354	702.519	721.048	452.517	510.607	589.141
ENSMUSG00000025932.14	Eya1	562.119	-1.67947	0.284429	-5.90472	3.53257e-09	6.28778e-08	1212.29	757.212	986.834	539.217	281.008	357.601	342.753	273.509	308.647
ENSMUSG00000037251.5	Pomk	1179.68	-1.43523	0.243066	-5.90471	3.53257e-09	6.28778e-08	1952.29	1484.77	2483.07	893.72	657.148	952.953	812.874	641.01	739.294
ENSMUSG00000030047.14	Arhgap25	2248.44	-1.23638	0.209489	-5.90186	3.59432e-09	6.39175e-08	3727.1	2454.1	3478.94	2310.8	1917.29	2244.02	1176.34	1557.22	1370.14
ENSMUSG00000097164.2	Cep83os	181.563	-1.10726	0.18765	-5.90063	3.62107e-09	6.43335e-08	219.595	230.357	247.404	196.842	218.805	196.827	120.119	109.234	94.8882
ENSMUSG00000039313.14	RP23-407B23.1	26.6115	-2.6681	0.452249	-5.89964	3.64296e-09	6.46625e-08	65.1767	52.4574	48.6468	19.5909	17.563	9.74389	9.31958	7.62099	9.38455
ENSMUSG00000057367.12	Birc2	1926.69	1.52852	0.259107	5.8992	3.65273e-09	6.4776e-08	970.631	873.53	1116.1	1842.48	1811.18	2173.86	3547.65	1830.73	3174.06
ENSMUSG00000043629.12	AC129337.1	28.3602	4.36635	0.740681	5.89505	3.74577e-09	6.63646e-08	1.00272	0	3.47477	45.7122	52.6889	29.2317	39.3493	52.5002	31.2818
ENSMUSG00000039501.14	Znfx1	20522	1.29493	0.219749	5.89274	3.79838e-09	6.72344e-08	10121.4	13472.4	8290.8	28435.8	24835.5	21337.2	27338.5	27889.4	22976.5
ENSMUSG00000040351.11	Ankib1	3637.37	1.10699	0.187883	5.8919	3.81777e-09	6.75154e-08	2536.88	2465.5	2497.66	3146.68	3030.35	2901.73	6802.26	4357.51	4997.8
ENSMUSG00000026981.15	Il1rn	2933.11	3.58514	0.608766	5.8892	3.88074e-09	6.85657e-08	474.286	736.685	168.874	2437.67	4810.79	1253.06	5442.63	8934.34	2139.68
ENSMUSG00000028906.16	Epb41	4925.63	-0.646802	0.109948	-5.88277	4.03445e-09	7.12158e-08	6258.97	6119.27	6210.8	4973.3	4627.84	4265.88	4089.22	3837.59	3947.77
ENSMUSG00000050908.12	Tvp23a	830.955	0.983418	0.167289	5.87857	4.13827e-09	7.29813e-08	487.321	652.297	558.048	742.59	899.371	800.948	1139.06	1167.71	1031.26
ENSMUSG00000056124.5	B4galt6	6399.31	-1.12633	0.191656	-5.87684	4.18169e-09	7.36793e-08	11002.8	8386.35	8688.31	6263.5	5265.97	5122.37	5084.35	3765.62	4014.5
ENSMUSG00000033777.4	Tlr13	10893.5	-1.94985	0.331893	-5.87494	4.22999e-09	7.44618e-08	19459.7	22741.4	17128.5	6410.9	10219.5	6726.21	3611.85	7917.36	3825.77
ENSMUSG00000020700.11	Map3k3	9763.91	1.05581	0.179756	5.87358	4.26489e-09	7.50074e-08	4917.33	4655.03	5107.91	16382.7	11722.6	14563.2	11344	8694.71	10487.8
ENSMUSG00000022265.7	Ank	2819.55	-1.13535	0.193316	-5.87304	4.27887e-09	7.51841e-08	3644.88	2823.58	4402.53	3190.52	2870.82	3489.29	1577.08	1726.58	1650.64
ENSMUSG00000034731.10	Dgkh	969.997	0.900263	0.153391	5.86908	4.3821e-09	7.69276e-08	618.677	597.559	732.481	1061.64	1126.23	942.235	1226.04	1285.41	1139.7
ENSMUSG00000023947.7	Nfkbie	3407.68	3.44872	0.587711	5.86805	4.40945e-09	7.73369e-08	1331.61	355.798	669.935	1326.59	298.571	918.849	13282.5	3890.09	8595.21
ENSMUSG00000034973.16	Dopey1	2347.66	0.917068	0.156382	5.86428	4.51083e-09	7.90427e-08	1117.03	1258.98	1412.15	3499.31	3435.03	3247.64	2638.48	2094.93	2425.39
ENSMUSG00000073490.11	Ifi207	31562.5	1.64895	0.281197	5.86402	4.51791e-09	7.90944e-08	14167.4	14081.4	9323.5	52306.9	35383.5	40983.8	51415.1	27985.1	38416.2
ENSMUSG00000037847.13	Nmrk1	210.459	-1.07534	0.183401	-5.86335	4.53608e-09	7.934e-08	270.734	317.025	291.186	188.446	190.266	222.161	125.297	152.42	136.597
ENSMUSG00000059498.13	Fcgr3	59792.5	1.56141	0.266312	5.86309	4.54343e-09	7.93962e-08	31265.7	23373.2	30426.5	71840	49121.5	81026.3	97582.2	59855.3	93642.2
ENSMUSG00000020806.15	Rhbdf2	6109.87	1.7906	0.305428	5.86258	4.55726e-09	7.95652e-08	2952	2305.85	3331.61	6681.44	4246.58	5739.15	13785.7	6384.7	9561.82
ENSMUSG00000054604.7	Cggbp1	7508.25	0.995174	0.169811	5.86048	4.61534e-09	8.0506e-08	4905.3	4830.65	4718.74	8159.16	8111.9	8034.82	11465.2	7675.19	9673.39
ENSMUSG00000028337.14	Coro2a	7079.94	1.40358	0.239547	5.8593	4.64809e-09	8.10035e-08	2991.11	4871.7	3380.95	6997.7	9155.43	6603.44	9323.72	11541.6	8853.8
ENSMUSG00000000562.5	Adora3	923.384	2.08797	0.356495	5.85694	4.71465e-09	8.20889e-08	119.323	68.4227	174.433	2431.14	1457	2490.54	621.305	381.05	567.244
ENSMUSG00000099059.1	Mir7676-2	182.652	2.09379	0.357586	5.85535	4.75993e-09	8.2802e-08	54.1468	52.4574	72.2752	305.059	150.017	236.777	347.931	181.21	243.998
ENSMUSG00000028719.8	Cmpk1	8455.77	1.17121	0.200038	5.85492	4.77234e-09	8.29427e-08	5367.55	5601.54	3961.93	8763.68	10479.2	8320.31	13031.9	10464.5	10111.3
ENSMUSG00000031257.14	Nox1	103.607	1.73499	0.296346	5.85463	4.78078e-09	8.30141e-08	39.106	41.0536	56.9862	101.686	128.063	99.3877	194.676	124.476	147.025
ENSMUSG00000110235.1	RP23-116E3.2	256.337	-2.29133	0.391611	-5.85104	4.88509e-09	8.47486e-08	472.28	287.376	484.383	319.052	143.431	344.934	101.48	55.0405	99.0592
ENSMUSG00000016498.9	Pdcd1lg2	50.2297	4.05271	0.69278	5.84992	4.91796e-09	8.52417e-08	8.02174	11.4038	3.47477	40.1148	16.0994	22.411	213.315	42.3388	94.8882
ENSMUSG00000062380.4	Tubb3	38.2467	4.02405	0.688446	5.84512	5.06217e-09	8.7662e-08	4.01087	6.84227	2.77982	36.3832	71.7155	24.3597	46.5979	106.694	44.8373
ENSMUSG00000037526.7	Atg14	713.705	-1.32541	0.226772	-5.8447	5.07479e-09	8.78013e-08	1143.1	821.073	1194.63	781.772	512.985	705.458	425.594	390.364	448.373
ENSMUSG00000060477.14	Irak2	3011.45	1.90426	0.32612	5.83914	5.24719e-09	9.07022e-08	1841.99	994.41	1502.49	2480.59	2106.83	1914.68	7478.44	3286.34	5497.26
ENSMUSG00000005802.12	Slc30a4	1888.31	1.42414	0.244102	5.83419	5.40534e-09	9.33518e-08	915.481	1147.22	816.571	2001.07	2428.81	1976.06	3367.47	1959.44	2382.63
ENSMUSG00000031671.11	Setd6	341.674	0.936749	0.160585	5.83334	5.43286e-09	9.37425e-08	213.579	248.603	204.316	373.161	371.018	403.397	398.671	405.606	456.715
ENSMUSG00000037999.13	Arap2	1732.31	1.6371	0.280701	5.83219	5.47038e-09	9.4305e-08	682.851	907.742	514.961	2127.02	2759.58	2073.5	2882.86	1743.51	1898.81
ENSMUSG00000005609.16	Ctr9	1578.75	-0.659029	0.113048	-5.82965	5.55422e-09	9.56643e-08	1900.15	1849.69	2053.59	1533.69	1601.16	1590.2	1161.84	1237.99	1280.47
ENSMUSG00000090399.1	RP24-409F22.2	190.368	-1.5834	0.271651	-5.8288	5.58266e-09	9.60678e-08	240.652	291.937	265.472	222.031	234.173	194.878	61.095	122.783	80.2901
ENSMUSG00000024437.6	RP23-408A1.5	131.33	-1.29031	0.221452	-5.82658	5.65757e-09	9.72697e-08	216.587	175.618	174.433	136.204	129.527	117.901	65.237	87.218	79.2473
ENSMUSG00000026670.15	Uap1	1551.89	1.37032	0.235411	5.82099	5.84996e-09	1.00487e-07	943.558	857.565	1073.7	1228.63	1109.39	1309.58	3082.71	1720.65	2641.23
ENSMUSG00000010205.11	Raver1	2681.69	0.917798	0.157687	5.82037	5.87175e-09	1.00771e-07	2073.62	2084.61	1995.91	2369.57	2092.19	1894.21	4298.4	3327.83	3998.86
ENSMUSG00000051343.11	Rab11fip5	7114.08	-1.58709	0.272966	-5.81424	6.09084e-09	1.04438e-07	12682.4	8470.74	13393.8	7002.36	4726.64	6250.71	2934.63	4963.81	3601.58
ENSMUSG00000016933.17	Plcg1	604.429	-1.16972	0.201237	-5.81265	6.14907e-09	1.05262e-07	811.199	668.262	946.527	715.536	527.621	687.919	350.002	348.025	384.767
ENSMUSG00000093677.1	RP23-102L5.1	68.9786	-1.67774	0.288636	-5.81263	6.14988e-09	1.05262e-07	132.359	82.1073	123.702	57.8399	53.4207	63.3353	36.2428	32.1775	39.6237
ENSMUSG00000026768.10	Itga8	176.078	1.68661	0.290272	5.81043	6.23115e-09	1.06558e-07	69.1875	107.196	82.0045	150.197	210.756	148.107	341.718	270.122	205.417
ENSMUSG00000056069.10	Fam105a	5147.14	-2.24891	0.387105	-5.80957	6.26339e-09	1.07014e-07	9355.36	5419.08	13534.9	3922.85	2726.65	5407.86	1563.62	1573.31	2820.58
ENSMUSG00000037316.9	Bag4	510.584	-1.13364	0.195144	-5.80923	6.27613e-09	1.07136e-07	663.799	709.316	637.968	542.016	594.214	533.965	230.918	355.646	327.417
ENSMUSG00000008373.16	Prpf31	3186.24	1.19038	0.205097	5.80396	6.47664e-09	1.1046e-07	1812.91	2351.46	1473.3	3432.15	3705.06	3064.45	4609.05	4417.64	3810.13
ENSMUSG00000036862.15	Dchs1	110.395	-2.35017	0.404947	-5.80364	6.48894e-09	1.10572e-07	200.544	130.003	304.39	85.8269	47.5664	99.3877	35.2073	36.4114	54.2219
ENSMUSG00000056153.14	Socs6	3004.42	-1.65598	0.285416	-5.802	6.5529e-09	1.11562e-07	5413.67	2652.52	5272.61	3640.18	2534.19	3290.51	1443.5	1274.4	1518.21
ENSMUSG00000052837.6	Junb	4490.99	2.46728	0.425546	5.79791	6.71453e-09	1.14213e-07	2746.44	1147.22	1216.17	3704.55	1485.54	1847.44	11188.7	6736.96	10345.9
ENSMUSG00000028165.9	Cisd2	3194.47	1.04217	0.179933	5.79197	6.95636e-09	1.18221e-07	1876.09	1788.11	2300.99	3184.93	3524.3	3774.78	4569.7	3426.91	4304.38
ENSMUSG00000020577.17	Tspan13	890.682	1.76254	0.304376	5.79067	7.01082e-09	1.19041e-07	321.872	394.571	396.819	668.89	1222.82	1237.47	875.005	1577.55	1321.14
ENSMUSG00000027822.16	Slc33a1	4100.59	1.67128	0.28863	5.79038	7.02256e-09	1.19135e-07	2132.78	1443.72	2260.68	4097.3	3511.86	4846.61	7662.76	3988.32	6961.25
ENSMUSG00000039294.14	RP23-349B15.4	7206.61	1.08687	0.187712	5.79007	7.03567e-09	1.19252e-07	3964.75	3786.06	4644.38	8114.38	7635.5	10372.4	9272.98	7490.59	9578.5
ENSMUSG00000019768.16	Esr1	564.986	1.27159	0.219809	5.78501	7.25089e-09	1.22791e-07	405.098	335.271	401.683	471.115	335.16	367.345	1106.96	751.938	910.302
ENSMUSG00000032392.11	Parp16	56.7597	-2.16376	0.374076	-5.78428	7.28247e-09	1.23217e-07	85.231	84.388	127.871	37.3161	61.4704	47.7451	14.4971	26.2501	26.0682
ENSMUSG00000029627.12	Zkscan14	354.049	-1.3417	0.232071	-5.78145	7.40615e-09	1.25199e-07	630.71	403.694	542.759	361.966	258.322	363.447	203.995	201.533	220.016
ENSMUSG00000070407.5	Hs3st3b1	402.89	2.84214	0.491855	5.77841	7.54077e-09	1.27363e-07	26.0707	68.4227	63.2408	780.839	504.936	1062.08	464.943	154.96	500.509
ENSMUSG00000038055.12	Dexi	504.903	1.39479	0.241428	5.77724	7.59343e-09	1.28139e-07	292.794	232.637	362.071	444.994	344.673	512.529	836.691	655.405	862.336
ENSMUSG00000028031.6	Dkk2	60.6423	-3.07076	0.531778	-5.7745	7.71808e-09	1.30014e-07	67.1821	61.5805	138.296	86.7599	41.7121	117.901	14.4971	8.46777	9.38455
ENSMUSG00000035314.10	Gdpd5	631.805	-1.90446	0.329799	-5.7746	7.71367e-09	1.30014e-07	850.305	898.619	1209.91	566.271	661.539	709.356	135.652	348.025	306.562
ENSMUSG00000025969.15	Nrp2	31551	1.27816	0.221558	5.76896	7.97643e-09	1.34248e-07	18949.4	16715.7	19219.6	36730.2	25939.1	33284.2	56346.2	35480.8	41294.1
ENSMUSG00000115667.1	RP23-120K5.8	69.8444	1.93432	0.335646	5.76296	8.26494e-09	1.38982e-07	28.0761	38.7729	17.3738	94.2231	79.0334	71.1304	102.515	110.928	86.5464
ENSMUSG00000038533.15	Cbfa2t2	698.569	-0.757528	0.131499	-5.7607	8.37661e-09	1.40736e-07	863.34	827.915	881.896	755.65	742.768	690.842	470.121	502.986	551.603
ENSMUSG00000015355.13	Cd48	8270.01	-1.07035	0.185916	-5.75715	8.55447e-09	1.43598e-07	12063.7	9029.52	11983.1	8245.92	7346.45	10005	5604.17	4978.2	5174.02
ENSMUSG00000000732.9	Icosl	3008.33	2.5628	0.445184	5.75672	8.57655e-09	1.43843e-07	970.631	754.931	1472.61	1594.33	1221.36	2143.66	7325.19	2414.16	9178.09
ENSMUSG00000097724.2	RP24-176D22.1	979.808	1.63676	0.284418	5.75478	8.67542e-09	1.45374e-07	636.726	335.271	485.773	996.339	801.311	1008.49	1819.39	1086.41	1648.55
ENSMUSG00000017288.15	Vps53	1900.37	0.650441	0.113032	5.7545	8.68986e-09	1.45489e-07	1458.95	1416.35	1641.48	1817.29	1821.43	1841.6	2363.03	2415.85	2327.37
ENSMUSG00000032741.9	Tpcn1	4716.11	-1.66925	0.290101	-5.75404	8.71372e-09	1.45761e-07	6897.7	5503.47	9716.84	4365.05	4264.88	4741.38	1502.52	2934.93	2518.19
ENSMUSG00000032688.8	Malt1	3383.52	2.19213	0.380989	5.75378	8.72686e-09	1.45853e-07	1227.33	1443.72	1118.88	3296.87	3132.06	2922.19	9591.92	2665.65	5053.06
ENSMUSG00000056458.16	Mok	46.1321	-2.0925	0.363765	-5.75233	8.80202e-09	1.46982e-07	77.2093	70.7035	108.413	37.3161	30.0034	31.1805	14.4971	27.0969	18.7691
ENSMUSG00000030084.11	Plxna1	11507.4	-1.26458	0.220227	-5.74216	9.3475e-09	1.55954e-07	18287.6	14453.2	20294	11001.7	8683.43	8770.48	7726.97	8635.43	5714.15
ENSMUSG00000015937.15	H2afy	5486.97	0.806926	0.14061	5.73877	9.53693e-09	1.58976e-07	4119.17	3795.18	4462.99	4984.49	5094	5255.86	7977.56	6333.89	7359.57
ENSMUSG00000055322.15	Tns1	7701.74	-1.49474	0.260491	-5.73816	9.57094e-09	1.59405e-07	13113.5	8817.41	13776.1	9092.06	4986.42	6856.78	4160.67	4028.96	4483.73
ENSMUSG00000020440.13	Arf5	3542.52	0.770876	0.134406	5.73541	9.72746e-09	1.61871e-07	3083.36	2650.24	2480.99	3336.99	3028.88	3283.69	4872.07	4480.3	4666.21
ENSMUSG00000030200.13	Bcl2l14	25.103	3.40479	0.593699	5.73488	9.75814e-09	1.62241e-07	7.01903	4.56152	4.86468	18.658	6.58612	6.82073	68.3436	42.3388	66.7346
ENSMUSG00000005774.12	Rfx5	712.761	0.930616	0.162297	5.73403	9.80739e-09	1.62918e-07	474.286	572.47	567.777	521.492	579.578	626.532	1128.7	935.689	1008.32
ENSMUSG00000016831.12	Tox4	4800.34	0.93729	0.163525	5.73179	9.93775e-09	1.64941e-07	3454.36	3313.94	3388.59	4847.36	4059.97	4684.86	7541.61	5455.78	6456.57
ENSMUSG00000092482.1	RP24-297C1.11	1846.7	1.03601	0.180956	5.72519	1.03321e-08	1.71338e-07	1410.82	1434.6	1180.03	1632.58	1243.31	1474.25	3112.74	2389.6	2742.37
ENSMUSG00000068742.11	Cry2	243.408	-1.26737	0.221515	-5.72139	1.05657e-08	1.7506e-07	332.902	440.186	406.548	194.976	172.703	155.902	129.439	192.218	165.794
ENSMUSG00000046806.13	RP23-386A17.6	13207.1	1.749	0.305824	5.71898	1.07168e-08	1.7741e-07	6041.38	3895.53	5700.71	19003.2	10440.5	21202.7	20704	13595	18281.1
ENSMUSG00000029561.17	Oasl2	13085.3	2.38735	0.417582	5.71707	1.08378e-08	1.79259e-07	2804.6	7973.53	2118.91	12564.3	14171.9	10709.5	23492.6	22760.5	21171.5
ENSMUSG00000015312.9	Gadd45b	2143.42	2.39612	0.419187	5.7161	1.08994e-08	1.79907e-07	1431.88	599.839	622.679	1195.98	668.857	785.358	6073.26	2610.61	5302.27
ENSMUSG00000025856.15	Pdgfa	2195.54	2.00969	0.35159	5.71599	1.09066e-08	1.79907e-07	982.664	782.3	962.511	2418.08	1200.87	2420.38	4508.6	2100.85	4383.63
ENSMUSG00000038517.15	Tbkbp1	2458.82	1.58189	0.276735	5.71625	1.08903e-08	1.79907e-07	1347.65	1170.03	1618.55	2081.3	1358.94	2156.32	4968.37	2848.56	4579.66
ENSMUSG00000038524.13	Fchsd1	420.367	-1.41487	0.247533	-5.71587	1.09145e-08	1.79907e-07	545.479	538.259	737.346	444.061	347.601	486.22	170.859	254.88	258.597
ENSMUSG00000037649.9	H2-DMa	1677.44	1.72124	0.301277	5.71317	1.10892e-08	1.82629e-07	1109.01	636.331	918.729	1450.66	827.655	1351.48	3536.26	2203.31	3063.53
ENSMUSG00000025195.9	Dnmbp	878.328	-1.46403	0.256376	-5.71049	1.1265e-08	1.85268e-07	1394.78	1149.5	1712.37	852.672	565.674	684.996	384.174	562.26	598.526
ENSMUSG00000033610.15	Pank1	259.674	-1.47728	0.258699	-5.71044	1.12688e-08	1.85268e-07	366.995	433.344	448.245	185.647	215.146	239.7	99.4088	160.888	187.691
ENSMUSG00000038521.17	C1s1	26.8534	8.4164	1.47459	5.70763	1.14559e-08	1.88183e-07	0	0	0	12.1277	1.46358	7.79512	136.687	12.7017	70.9055
ENSMUSG00000031024.13	St5	31.6599	-3.4247	0.600181	-5.7061	1.15594e-08	1.89721e-07	67.1821	43.3344	69.4954	39.1819	19.0266	29.2317	6.21305	0.846777	10.4273
ENSMUSG00000025025.13	Mxi1	736.424	-1.3526	0.23706	-5.70573	1.15849e-08	1.89976e-07	1274.45	866.688	1207.13	695.945	491.763	777.563	401.777	427.622	484.869
ENSMUSG00000108815.1	RP23-325D10.3	5440.37	0.732203	0.128485	5.69875	1.20691e-08	1.97748e-07	3875.5	4301.51	4415.04	5284.89	4660.78	5509.2	7127.41	6587.92	7201.08
ENSMUSG00000032344.17	Mb21d1	1107.44	1.24568	0.218804	5.69313	1.24731e-08	2.04193e-07	376.019	488.082	376.665	1956.29	2324.17	1520.05	1107.99	940.769	876.934
ENSMUSG00000022801.13	Lrch3	3179.14	0.918493	0.161392	5.69106	1.26254e-08	2.06509e-07	2342.35	2191.81	2248.87	3363.11	3001.81	2638.65	4911.42	3807.96	4106.26
ENSMUSG00000090812.8	Samd15	51.6661	2.39947	0.421686	5.69018	1.26902e-08	2.07392e-07	15.0408	29.6499	13.2041	27.987	59.275	38.0012	100.444	81.2906	100.102
ENSMUSG00000059518.14	Znhit1	1084.73	0.973442	0.171166	5.68713	1.29194e-08	2.10958e-07	875.373	663.701	708.158	1112.02	961.573	1019.21	1319.24	1635.13	1468.16
ENSMUSG00000028927.6	Padi2	1581.01	-1.37359	0.241533	-5.68698	1.29307e-08	2.10963e-07	2368.42	1701.45	2650.55	1875.13	1211.11	1825.03	859.472	790.043	947.84
ENSMUSG00000028385.14	Snx30	3411.51	-0.847437	0.149091	-5.68403	1.31557e-08	2.14353e-07	5228.17	4299.23	4882.75	3113.09	2701.04	2466.18	2715.1	2757.95	2540.09
ENSMUSG00000100018.1	RP24-148E21.3	149.157	1.23253	0.216844	5.68396	1.31608e-08	2.14353e-07	106.288	82.1073	85.4793	119.411	139.04	161.749	205.031	220.162	223.144
ENSMUSG00000087036.1	RP23-159O6.4	36.0169	-3.62337	0.637551	-5.68326	1.32152e-08	2.15055e-07	151.41	50.1767	70.1903	11.1948	8.78149	10.7183	2.07102	14.3952	5.21364
ENSMUSG00000074344.6	Tmigd3	391.617	2.12303	0.373609	5.68248	1.32753e-08	2.1585e-07	55.1495	29.6499	74.3601	1060.71	564.942	1021.16	284.765	171.049	262.767
ENSMUSG00000108436.1	RP23-137A24.6	56.2083	2.6009	0.457729	5.68218	1.32991e-08	2.16054e-07	9.02446	13.6845	25.0183	68.1018	46.1028	42.8731	125.297	110.081	65.6919
ENSMUSG00000037075.7	Rnf139	3835.84	0.884686	0.155768	5.67952	1.35074e-08	2.19252e-07	2415.55	2410.76	2346.16	4126.22	4886.17	5095.08	5019.11	3877.39	4346.09
ENSMUSG00000028232.13	Tmem68	2453.58	0.86928	0.153091	5.67819	1.3613e-08	2.2078e-07	1684.57	1642.15	1821.47	2088.77	2723.73	2708.8	3265.99	3006.06	3140.7
ENSMUSG00000090659.9	Zfp493	58.4633	-1.55591	0.274291	-5.67247	1.40752e-08	2.28083e-07	98.2664	86.6688	84.0894	55.0412	57.0797	53.5914	25.8877	32.1775	33.3673
ENSMUSG00000045636.16	Mtus1	442.167	-2.18405	0.385404	-5.66691	1.45399e-08	2.35414e-07	811.199	449.309	1172.39	376.892	283.935	349.806	146.007	265.888	124.085
ENSMUSG00000039678.12	Tbc1d13	7322.33	0.678094	0.119776	5.66137	1.50169e-08	2.42931e-07	5610.21	4942.4	5330.3	8383.99	7682.34	8524.93	8080.07	8264.54	9082.16
ENSMUSG00000020190.13	Mknk2	5372.52	-1.30024	0.22972	-5.66012	1.51268e-08	2.44504e-07	8961.29	7524.22	9903.09	3572.08	3754.09	3920.94	2466.58	4076.38	4174.04
ENSMUSG00000028525.16	Pde4b	3801.91	3.39643	0.600196	5.65888	1.52365e-08	2.46068e-07	1100.98	239.48	749.16	4532.04	2376.12	3180.41	12025.4	1981.46	8032.13
ENSMUSG00000079505.2	RP23-331E12.9	1092.08	2.03183	0.359126	5.6577	1.53415e-08	2.47555e-07	770.087	291.937	344.697	981.413	785.943	884.746	2413.77	1470.85	1885.25
ENSMUSG00000027171.10	Prrg4	1500.11	3.27944	0.579853	5.65565	1.55259e-08	2.50321e-07	65.1767	554.224	164.009	1268.75	2512.24	1391.43	2138.33	2936.62	2470.22
ENSMUSG00000094786.1	RP24-63F2.1	39.5924	-2.09332	0.370264	-5.65358	1.57136e-08	2.53135e-07	59.1604	61.5805	61.1559	51.3096	42.4439	38.0012	9.31958	13.5484	19.8118
ENSMUSG00000005656.9	Snx6	4841.68	1.03843	0.183851	5.64819	1.62149e-08	2.60811e-07	3576.69	3108.67	2778.43	4754.07	5006.18	4912.87	7812.91	5393.97	6231.34
ENSMUSG00000018415.14	Gid4	643.183	-0.763412	0.135165	-5.64802	1.6231e-08	2.60811e-07	840.278	891.776	817.961	606.386	543.721	588.531	493.938	464.881	541.176
ENSMUSG00000065820.1	Gm26316	15.3087	-22.0802	3.90934	-5.64806	1.62272e-08	2.60811e-07	0	136.845	0	0.932902	0	0	0	0	0
ENSMUSG00000029438.9	Bcl7a	163.326	-1.29506	0.229346	-5.64673	1.63526e-08	2.62545e-07	228.62	200.707	263.387	166.989	141.236	185.134	78.6987	109.234	95.931
ENSMUSG00000057137.9	Tmem140	15212.5	1.6719	0.29613	5.64581	1.64404e-08	2.63735e-07	7163.42	4883.1	6661.13	22248.8	12160.2	24171.7	23564	15515.5	20544.9
ENSMUSG00000023022.14	Lima1	1762.7	-1.41976	0.251772	-5.63907	1.70967e-08	2.74033e-07	2955.01	2096.02	2820.82	1907.78	1347.23	1791.9	1262.29	760.406	922.814
ENSMUSG00000021771.14	Vdac2	8672.42	0.901315	0.159861	5.63811	1.71924e-08	2.75337e-07	7185.48	6689.46	5786.19	7654.46	7384.5	6634.62	14001.1	11016.6	11699.4
ENSMUSG00000027641.13	Rbl1	2735.27	2.32755	0.412907	5.63698	1.7306e-08	2.76926e-07	659.788	1781.27	672.715	1399.35	2948.38	1567.79	5620.74	4916.39	5050.97
ENSMUSG00000020228.11	Helb	1373.45	-1.00805	0.178859	-5.63602	1.74028e-08	2.78241e-07	1411.83	1731.1	1812.44	1572.87	1723.37	1646.72	674.116	877.261	911.344
ENSMUSG00000026728.9	Vim	64759.2	1.79021	0.317765	5.63375	1.76333e-08	2.81691e-07	21601.6	42148.4	22622.8	57761.5	85086.8	54909.8	89416.2	126648	82637.2
ENSMUSG00000025521.15	Tmem192	2363.82	1.13516	0.20151	5.63328	1.76812e-08	2.82222e-07	1541.18	1188.27	1649.13	2328.52	2180.74	2747.78	3649.13	2662.27	3327.35
ENSMUSG00000021840.17	Mapk1ip1l	2942.05	1.00487	0.17859	5.62666	1.83731e-08	2.92778e-07	2100.69	2278.48	1874.99	2909.72	2368.07	2407.72	4891.74	3610.66	4036.4
ENSMUSG00000029499.11	Pxmp2	49.1264	2.15701	0.383354	5.62668	1.83716e-08	2.92778e-07	27.0734	18.2461	20.1537	25.1883	35.8577	18.5134	107.693	73.6696	115.743
ENSMUSG00000037656.9	Slc20a2	846.254	0.858327	0.15264	5.62321	1.87446e-08	2.9845e-07	437.185	431.063	474.653	1283.67	1127.69	1421.63	774.56	867.1	798.73
ENSMUSG00000022438.6	Parvb	2283.75	-0.754069	0.134118	-5.62242	1.88299e-08	2.9956e-07	2832.68	3190.78	2895.87	2094.36	2247.33	2010.17	1594.68	1929.8	1758.04
ENSMUSG00000022503.10	Nubp1	1603.35	0.849646	0.151305	5.61545	1.96057e-08	3.11642e-07	1184.21	1222.49	1056.33	1561.68	1723.37	1452.81	2233.59	2167.75	1827.9
ENSMUSG00000024335.19	Brd2	13767.8	1.11452	0.19848	5.61529	1.96233e-08	3.11665e-07	11092.1	8470.74	9815.53	11854.4	8385.59	10666.6	24174	18419.1	21031.8
ENSMUSG00000071324.11	Armc2	75.7428	-2.0575	0.366803	-5.60928	2.03176e-08	3.22424e-07	165.448	75.265	152.89	73.6992	59.275	58.4634	36.2428	22.863	37.5382
ENSMUSG00000035969.15	Rusc2	1638.85	-1.02447	0.182654	-5.60877	2.03774e-08	3.23105e-07	2523.84	2020.75	2521.99	1669.89	1282.83	1253.06	1156.66	1259.16	1061.5
ENSMUSG00000023048.13	Prr13	6316.49	1.15941	0.206917	5.60324	2.10388e-08	3.33316e-07	3950.71	3259.2	4109.96	6958.51	5583.56	7685.98	9023.42	6718.33	9558.69
ENSMUSG00000078772.2	RP23-109G18.5	408.258	-1.58899	0.283726	-5.60042	2.1383e-08	3.3849e-07	714.938	453.871	705.378	466.451	311.011	396.577	258.877	152.42	214.802
ENSMUSG00000086773.1	AC116511.5	27.2953	-3.77236	0.673766	-5.59891	2.15702e-08	3.41172e-07	73.1984	22.8076	85.4793	24.2554	8.78149	17.539	3.10653	4.23388	6.25637
ENSMUSG00000092134.1	RP23-110A19.2	204.634	1.91991	0.343609	5.58748	2.30386e-08	3.64097e-07	102.277	70.7035	67.4105	296.663	178.557	212.417	433.878	220.162	259.639
ENSMUSG00000032479.15	Map4	7113.3	0.970206	0.173669	5.58653	2.31655e-08	3.65801e-07	4756.89	5521.72	5383.11	5655.25	6247.3	5776.18	11619.4	8147.69	10912.1
ENSMUSG00000033624.10	Pdpr	1155.74	-0.896864	0.160649	-5.58275	2.36751e-08	3.7354e-07	1411.83	1245.29	1658.16	1364.84	1135.74	1261.83	764.205	762.099	797.687
ENSMUSG00000041115.16	Iqsec2	2427.21	1.15647	0.207255	5.57995	2.40592e-08	3.79289e-07	1547.19	1252.14	1849.27	2528.16	1830.21	2453.51	3569.4	3137.31	3677.7
ENSMUSG00000075273.4	Ttc30b	148.663	-1.52545	0.273448	-5.57856	2.42517e-08	3.8201e-07	233.633	134.565	229.335	177.251	163.189	190.006	57.9885	82.1374	69.8628
ENSMUSG00000033096.7	Apmap	2693.77	1.01328	0.181681	5.57727	2.44316e-08	3.84527e-07	1629.42	2054.96	1731.13	2157.8	3076.45	2678.6	3880.05	3576.79	3458.73
ENSMUSG00000024786.9	AC127556.1	18.2089	5.35869	0.961678	5.57223	2.51503e-08	3.95513e-07	3.00815	0	0	14.9264	6.58612	8.7695	44.5269	51.6534	34.41
ENSMUSG00000032215.15	Rsl24d1	951.867	0.835544	0.150037	5.5689	2.56348e-08	4.02803e-07	716.943	725.281	601.135	931.969	1047.19	910.08	1309.92	1180.41	1143.87
ENSMUSG00000026600.12	Soat1	14104.8	-1.15188	0.206851	-5.56865	2.56721e-08	4.03059e-07	18847.1	15157.9	23745.9	15348.1	12018.9	15829.9	9253.31	8178.17	8563.92
ENSMUSG00000034792.8	Gna15	970.714	0.979247	0.175884	5.56756	2.58334e-08	4.05259e-07	742.011	627.208	768.619	823.752	687.151	857.463	1315.1	1294.72	1620.4
ENSMUSG00000021972.14	Hmbox1	2681.52	1.04871	0.188429	5.56552	2.61379e-08	4.097e-07	1773.81	1628.46	2153.66	2607.46	2120	2339.51	3756.83	3283.8	4470.17
ENSMUSG00000090110.8	Cmc4	179.666	1.13402	0.204065	5.55715	2.74219e-08	4.29476e-07	113.307	88.9496	134.126	162.325	188.802	172.467	243.345	254.033	259.639
ENSMUSG00000032563.16	Mrpl3	1660.5	0.79799	0.143618	5.55634	2.75487e-08	4.31109e-07	1312.56	1238.45	1180.73	1432.94	1759.22	1532.71	2348.53	2015.33	2124.04
ENSMUSG00000033576.12	Apol6	17.8437	6.79409	1.22287	5.55585	2.76258e-08	4.31963e-07	1.00272	0	0	4.66451	8.78149	6.82073	45.5624	36.4114	57.35
ENSMUSG00000054434.14	Tmem120b	238.009	-0.97986	0.176459	-5.55291	2.80945e-08	4.38934e-07	324.881	296.499	318.984	222.963	234.905	265.034	146.007	152.42	180.392
ENSMUSG00000032712.16	RP23-214L4.1	6484.41	1.00144	0.180365	5.55231	2.81921e-08	4.401e-07	4126.18	3811.15	4476.2	7296.22	6583.92	7201.71	9505.97	6493.09	8865.27
ENSMUSG00000037876.17	Jmjd1c	5321.01	-0.964252	0.173705	-5.55109	2.83899e-08	4.42828e-07	8257.38	6963.15	7665.34	5158.95	4070.22	4040.79	4507.57	3619.97	3605.75
ENSMUSG00000116958.1	RP23-405J10.3	46.1689	2.40968	0.434336	5.54797	2.89003e-08	4.50422e-07	14.0381	20.5268	7.64449	55.0412	67.3247	47.7451	59.024	88.9116	55.2646
ENSMUSG00000034157.12	Cipc	2412.25	-1.21421	0.218879	-5.54738	2.89976e-08	4.51571e-07	4657.62	3630.97	3831.98	1703.48	1448.95	1213.11	1602.97	2159.28	1461.9
ENSMUSG00000037020.16	Wdr62	1485.08	1.15367	0.207993	5.54667	2.91156e-08	4.5304e-07	765.074	1220.21	1125.83	1049.51	1268.93	1027.98	2386.85	2166.9	2354.48
ENSMUSG00000028619.15	Tceanc2	3213.74	1.36429	0.246017	5.5455	2.93112e-08	4.55715e-07	1875.08	1277.22	1706.81	4364.11	3028.88	4144.08	4944.55	3194.04	4388.84
ENSMUSG00000048806.4	Ifnb1	18.4177	6.95147	1.25372	5.54466	2.94533e-08	4.57552e-07	1.00272	0	0	4.66451	1.46358	2.92317	51.7754	33.0243	70.9055
ENSMUSG00000052534.15	Pbx1	336.542	1.37758	0.248588	5.54159	2.9973e-08	4.65249e-07	251.682	155.092	221.69	311.589	190.997	246.521	575.743	525.002	550.56
ENSMUSG00000045672.15	Col27a1	17.1449	3.53999	0.638957	5.54025	3.02035e-08	4.68447e-07	1.00272	4.56152	4.86468	9.32902	8.0497	6.82073	31.0653	40.6453	47.9655
ENSMUSG00000025209.4	Twnk	223.094	-1.46027	0.263634	-5.53903	3.04157e-08	4.71357e-07	401.087	239.48	414.192	199.641	158.799	208.519	121.155	148.186	116.786
ENSMUSG00000046079.16	Lrrc8d	1695.45	-0.766572	0.138428	-5.5377	3.06464e-08	4.74549e-07	2411.54	2146.19	2555.35	1376.96	1278.44	1304.71	1279.89	1536.9	1369.1
ENSMUSG00000026827.12	Gpd2	2087.32	1.96537	0.35506	5.53531	3.1067e-08	4.80673e-07	1140.09	955.638	909.695	1489.84	1334.79	1217.01	6345.6	2062.75	3330.47
ENSMUSG00000027940.18	Tpm3	8606.88	0.641017	0.115822	5.5345	3.12123e-08	4.82532e-07	6820.49	7528.78	6541.6	7894.21	8453.65	7665.52	11045.8	11186.8	10325.1
ENSMUSG00000116827.1	RP23-118J3.8	89.4906	-1.67085	0.301994	-5.53273	3.15281e-08	4.87022e-07	124.337	120.88	147.33	93.2902	109.037	87.695	33.1363	58.4276	31.2818
ENSMUSG00000047003.15	Zfp41	347.855	-1.5575	0.281559	-5.53169	3.17156e-08	4.89523e-07	501.359	517.732	512.876	333.979	425.17	320.574	113.906	245.565	159.537
ENSMUSG00000073795.11	AC107822.4	45.8556	-2.73685	0.494824	-5.53096	3.18479e-08	4.90995e-07	78.212	120.88	67.4105	30.7858	51.2254	25.3341	6.21305	21.1694	11.47
ENSMUSG00000087052.1	RP23-366K1.2	87.2847	1.56955	0.283779	5.53088	3.18622e-08	4.90995e-07	25.0679	43.3344	39.6124	123.143	131.722	108.157	103.551	93.1455	117.828
ENSMUSG00000023150.14	Ivns1abp	4771.29	-1.0152	0.183606	-5.52924	3.21627e-08	4.94831e-07	6204.82	5384.87	8110.81	4143.95	4916.17	4427.63	3241.14	3179.65	3332.56
ENSMUSG00000026782.15	Abi2	740.007	-0.778923	0.140872	-5.52931	3.21492e-08	4.94831e-07	901.443	930.549	1093.16	654.897	696.665	674.277	550.891	555.486	602.697
ENSMUSG00000031805.17	Jak3	1753.52	1.27775	0.231394	5.52198	3.35194e-08	5.15291e-07	1168.17	850.723	1114.71	2086.9	1292.34	1654.51	2759.63	2155.05	2699.62
ENSMUSG00000023010.15	Tmbim6	39713.4	1.40188	0.253913	5.52111	3.36858e-08	5.17019e-07	21996.6	17415.9	25682	43971.4	29517.5	46809.7	65699.9	44474.4	61853.6
ENSMUSG00000035692.6	Isg15	3470.65	2.66673	0.483003	5.52115	3.36794e-08	5.17019e-07	1051.85	1735.66	362.071	2981.55	3418.93	1725.64	7110.84	8395.79	4453.49
ENSMUSG00000086586.1	RP23-185A18.10	406.518	1.0324	0.187032	5.51993	3.39138e-08	5.20102e-07	219.595	255.445	286.321	407.678	432.488	495.964	553.997	455.566	551.603
ENSMUSG00000030452.16	Nipa2	5474.65	0.954883	0.173122	5.51565	3.47486e-08	5.32478e-07	3054.28	3204.47	3790.28	5574.09	6727.35	7432.64	6939.98	5814.82	6733.94
ENSMUSG00000021624.9	Cd180	23104.8	1.20096	0.217792	5.51426	3.50249e-08	5.36283e-07	12589.1	17755.7	11531.4	21779.5	28032.7	20011	34358.2	31661.8	30223.5
ENSMUSG00000034667.8	Xpot	2126.34	-0.926129	0.168156	-5.50755	3.63858e-08	5.56493e-07	2674.25	2942.18	2915.33	1936.7	2289.77	1891.29	1274.71	1738.43	1474.42
ENSMUSG00000085990.1	RP23-117B19.8	733.617	1.28907	0.234058	5.50747	3.64028e-08	5.56493e-07	431.169	442.467	349.562	717.401	1019.38	663.559	901.928	1189.72	887.362
ENSMUSG00000039217.13	Il18	348.675	1.51759	0.275644	5.50561	3.67896e-08	5.61958e-07	185.503	223.514	138.991	254.682	465.419	318.625	536.393	530.082	484.869
ENSMUSG00000017144.8	Rnd3	1663.38	2.10973	0.383474	5.50164	3.76283e-08	5.74312e-07	661.794	656.858	544.149	2057.98	1489.19	1523.95	4396.77	1272.71	2366.99
ENSMUSG00000048911.15	Rnf24	1168.3	1.07953	0.196469	5.49466	3.91463e-08	5.97005e-07	766.077	805.108	1030.62	815.356	693.738	893.515	1713.77	1667.3	2129.25
ENSMUSG00000043162.7	Pyurf	268.947	-0.924779	0.168331	-5.49382	3.93335e-08	5.99382e-07	390.057	351.237	334.273	243.487	286.862	248.469	190.534	197.299	178.306
ENSMUSG00000075256.9	Cerkl	5138.94	2.30233	0.419106	5.49344	3.94185e-08	6.002e-07	1936.25	980.726	2366.32	5438.82	3036.93	6404.66	10379.9	4685.22	11021.6
ENSMUSG00000087552.2	AC158789.2	274.551	-0.995114	0.181233	-5.49079	4.00132e-08	6.08772e-07	364.989	383.167	419.057	217.366	259.786	240.674	165.681	211.694	208.546
ENSMUSG00000053436.14	Mapk14	4553.84	-1.20007	0.218736	-5.48639	4.10234e-08	6.23647e-07	6568.81	5193.29	8227.56	4270.82	3527.96	4490.96	2498.68	2869.73	3336.73
ENSMUSG00000089940.1	RP24-163G22.1	80.5974	2.45564	0.447747	5.48444	4.1479e-08	6.30073e-07	12.0326	43.3344	24.3234	56.907	116.355	60.4121	119.083	149.033	143.896
ENSMUSG00000032089.16	Il10ra	26274.7	1.98001	0.361138	5.4827	4.18892e-08	6.35297e-07	10055.3	6639.29	12899	32924	20089.1	37097.9	45731.2	22807.1	48229.3
ENSMUSG00000035158.15	Mitf	2321.41	-1.23714	0.225642	-5.48273	4.18807e-08	6.35297e-07	3751.17	3124.64	3356.63	2492.71	1786.3	2038.42	1867.02	1188.03	1287.77
ENSMUSG00000015711.8	Prune	754.823	-0.920946	0.168067	-5.47965	4.26179e-08	6.45838e-07	1101.99	932.83	967.376	818.155	614.704	770.742	503.257	527.542	556.817
ENSMUSG00000026317.7	Cln8	5589.18	-1.2954	0.236411	-5.47943	4.26696e-08	6.46111e-07	11717.8	7743.17	9791.9	3675.63	2414.91	3039.12	3916.29	4646.27	3357.58
ENSMUSG00000047547.14	Cltb	1036.64	1.07919	0.196963	5.47917	4.27323e-08	6.4655e-07	797.161	620.366	544.844	1209.97	1017.19	992.903	1548.09	1298.96	1300.28
ENSMUSG00000027651.16	Rprd1b	1589.61	0.906362	0.165507	5.47628	4.34362e-08	6.56682e-07	1184.21	1151.78	1018.11	1618.58	1617.99	1435.28	2422.05	2071.22	1787.24
ENSMUSG00000022755.4	Adgrg7	81.1136	3.9061	0.713339	5.4758	4.35547e-08	6.57953e-07	7.01903	27.3691	3.47477	50.3767	110.5	26.3085	163.61	250.646	90.7173
ENSMUSG00000027243.8	Harbi1	142.021	-1.54508	0.282183	-5.47544	4.36418e-08	6.58751e-07	225.612	180.18	246.709	135.271	114.891	150.056	53.8465	69.4357	102.187
ENSMUSG00000032228.16	Tcf12	3112.01	-1.05096	0.192008	-5.47353	4.41158e-08	6.65381e-07	4141.23	4926.44	4387.24	2739	3075.72	2245.97	2564.96	1867.14	2060.43
ENSMUSG00000032898.9	Fbxo21	872.896	-1.12521	0.205816	-5.46708	4.57513e-08	6.89506e-07	1290.5	1005.81	1366.28	865.733	744.231	901.31	446.304	634.236	601.654
ENSMUSG00000020952.10	Scfd1	2711.33	0.956451	0.174995	5.46558	4.61401e-08	6.94565e-07	1999.42	2159.88	1621.33	2167.13	2818.86	2435	4027.09	3513.28	3659.98
ENSMUSG00000027074.14	Slc43a3	1082.66	2.4077	0.440526	5.4655	4.61594e-08	6.94565e-07	178.484	599.839	251.573	762.181	1662.63	863.309	1637.14	2138.11	1650.64
ENSMUSG00000041685.16	Fcho2	15854.6	1.60294	0.293302	5.46514	4.62547e-08	6.95453e-07	6887.67	4985.74	8381.84	22033.3	16031.3	22823.1	24969.2	13475.6	23103.7
ENSMUSG00000026107.11	Nabp1	1753.24	1.20775	0.221127	5.46178	4.71372e-08	7.08166e-07	676.835	1053.71	740.126	2318.26	2766.17	2541.21	2204.6	1578.39	1899.85
ENSMUSG00000056602.11	Fry	646.165	-0.938913	0.17196	-5.46008	4.7593e-08	7.14453e-07	658.786	768.615	784.603	847.075	896.444	707.407	341.718	407.3	403.536
ENSMUSG00000028826.14	Tmem57	1399.1	-0.721395	0.13219	-5.45726	4.83529e-08	7.24726e-07	1792.86	1683.2	1860.39	1251.95	1304.05	1457.69	1112.14	994.116	1135.53
ENSMUSG00000060090.16	Rp2	5822.56	1.34333	0.246152	5.4573	4.83436e-08	7.24726e-07	4113.15	2955.86	3360.8	5057.26	5159.86	5280.22	11455.8	6098.49	8921.58
ENSMUSG00000032376.12	Usp3	1180.8	-0.74488	0.136514	-5.45645	4.85756e-08	7.27495e-07	1614.38	1505.3	1555.31	1088.7	979.136	1094.24	832.549	1021.21	936.37
ENSMUSG00000022009.1	Nufip1	1085.42	1.04427	0.191443	5.45471	4.90535e-08	7.34079e-07	850.305	700.193	583.761	1153.07	1055.24	1027.01	1681.67	1332.83	1384.74
ENSMUSG00000115855.1	RP23-55A5.7	27.6388	3.82978	0.702131	5.45451	4.91079e-08	7.3432e-07	2.00544	9.12303	1.38991	24.2554	54.8843	24.3597	46.5979	42.3388	43.7946
ENSMUSG00000029817.11	Tra2a	4309.28	1.57723	0.289427	5.44949	5.05159e-08	7.54785e-07	2171.89	1696.88	2588.01	4640.25	3718.23	4683.89	8276.82	3972.23	7035.29
ENSMUSG00000074194.4	Zfp791	24.7176	-3.67811	0.67511	-5.44817	5.08907e-08	7.59793e-07	72.1957	47.8959	57.6812	13.9935	3.65895	12.6671	5.17754	0.846777	8.34182
ENSMUSG00000044350.14	Lacc1	5121.39	1.36832	0.251444	5.44185	5.27288e-08	7.86623e-07	3707.05	2579.54	3846.57	3529.17	3053.76	3195.02	11220.8	6292.4	8668.2
ENSMUSG00000020130.9	Tbc1d15	3342.88	-0.898486	0.165165	-5.43993	5.33023e-08	7.94561e-07	3983.8	4171.51	3956.37	3548.76	4534.18	3395.75	2331.97	2243.96	1919.66
ENSMUSG00000021770.11	Samd8	1910.71	-1.04778	0.192732	-5.43646	5.43509e-08	8.09562e-07	2901.87	2125.67	2965.37	2068.24	1525.05	1738.31	1349.27	1224.44	1298.2
ENSMUSG00000015316.11	Slamf1	49.3921	4.46534	0.821814	5.43351	5.52557e-08	8.22401e-07	6.01631	0	4.16972	80.2295	33.6624	63.3353	182.25	27.9436	46.9228
ENSMUSG00000074671.6	Tspyl3	169.516	-1.3297	0.24482	-5.43133	5.59364e-08	8.31886e-07	284.772	273.691	240.454	123.143	158.067	129.594	86.9827	137.178	91.7601
ENSMUSG00000036931.15	Nfkbid	562.615	1.79928	0.331324	5.43058	5.61716e-08	8.34736e-07	329.894	246.322	414.192	201.507	185.143	221.186	1338.91	634.236	1492.14
ENSMUSG00000025578.9	Cbx8	112.089	-2.72873	0.502961	-5.42534	5.78449e-08	8.58936e-07	199.541	253.164	246.709	46.6451	69.5201	88.6694	11.3906	66.0486	27.1109
ENSMUSG00000028599.10	Tnfrsf1b	11180.8	-1.92946	0.355829	-5.42243	5.87943e-08	8.72358e-07	26068.7	10247.4	28488.9	7111.51	5100.58	6594.67	6809.51	4515.01	5691.21
ENSMUSG00000107379.1	RP23-8L20.6	49.1912	3.35201	0.61826	5.42168	5.90414e-08	8.75346e-07	6.01631	27.3691	6.25458	8.39611	27.0763	10.7183	107.693	153.267	95.931
ENSMUSG00000028672.13	Hmgcl	2148.05	-0.553724	0.10222	-5.41701	6.06048e-08	8.97832e-07	2855.74	2816.74	2684.61	1697.88	1786.3	1800.67	1821.46	1939.97	1929.05
ENSMUSG00000021025.8	Nfkbia	6724.47	2.68238	0.495296	5.4157	6.10503e-08	9.03733e-07	3713.06	1160.91	2227.33	4024.54	1259.41	2527.57	18575	8328.05	18704.5
ENSMUSG00000038365.8	Fbxo25	467.291	-0.793694	0.146566	-5.41526	6.12005e-08	9.05258e-07	600.628	515.451	585.151	528.955	462.492	527.145	316.866	331.09	337.844
ENSMUSG00000048170.14	Mcmbp	3085.89	0.692596	0.127943	5.41331	6.18708e-08	9.14467e-07	2451.65	2511.11	2532.41	2822.96	2826.91	2513.92	4478.58	3854.53	3780.93
ENSMUSG00000027843.13	Ptpn22	501.853	-1.83704	0.339562	-5.41002	6.30163e-08	9.3068e-07	874.37	962.48	890.236	309.723	431.757	286.47	176.036	407.3	178.306
ENSMUSG00000022051.15	Bnip3l	2811.48	-0.7471	0.138105	-5.40964	6.31512e-08	9.31954e-07	3822.36	2996.92	3196.09	3192.39	2992.29	3130.71	2075.16	1929.8	1967.63
ENSMUSG00000000184.12	Ccnd2	872.212	3.40485	0.629624	5.40776	6.38172e-08	9.41059e-07	89.2419	421.94	83.3945	174.453	652.026	190.98	2064.8	2500.53	1672.54
ENSMUSG00000014551.8	Mrps25	1345.02	-0.754932	0.139663	-5.40538	6.46721e-08	9.52932e-07	1570.26	1797.24	1767.27	1207.17	1384.55	1338.81	915.39	1066.09	1058.37
ENSMUSG00000013662.5	Atad1	5127.13	0.931141	0.17233	5.40325	6.54434e-08	9.63557e-07	3391.19	3555.7	3576.23	4331.46	5686.01	5538.43	7781.85	6029.05	6254.28
ENSMUSG00000033581.17	Igf2bp2	2074.22	2.42071	0.448115	5.40199	6.59042e-08	9.69595e-07	462.253	1354.77	387.089	1348.04	2223.18	1136.14	4442.33	4098.4	3215.77
ENSMUSG00000085754.7	AC132567.2	1390.9	0.835164	0.154614	5.40162	6.60434e-08	9.70898e-07	887.405	1001.25	928.458	1775.31	1540.42	1367.07	1751.05	1535.21	1731.97
ENSMUSG00000022091.6	Sorbs3	419.747	-1.85597	0.343658	-5.40064	6.64047e-08	9.75462e-07	753.041	442.467	861.743	496.304	241.491	412.167	183.285	151.573	235.657
ENSMUSG00000031659.13	Adcy7	9918.84	-1.31566	0.243822	-5.39599	6.81462e-08	1.00028e-06	11581.4	13093.8	18347.5	8648	8782.22	11530.9	4584.2	5934.21	6767.3
ENSMUSG00000026986.14	Hnmt	431.881	-1.2857	0.238325	-5.39474	6.8621e-08	1.00648e-06	727.973	403.694	549.708	492.572	454.442	565.146	229.883	218.468	245.041
ENSMUSG00000115116.1	RP24-502J3.2	131.474	1.40804	0.261263	5.38935	7.07112e-08	1.03634e-06	78.212	84.388	67.4105	125.942	114.159	109.132	247.487	149.033	207.503
ENSMUSG00000032624.15	Eml4	1975.49	1.34082	0.248958	5.38575	7.21449e-08	1.05655e-06	1479.01	1188.27	1364.89	1335.92	1012.07	1176.09	4329.46	2328.64	3565.09
ENSMUSG00000032939.14	Nup93	2673.08	1.31765	0.244667	5.38549	7.22483e-08	1.05725e-06	1240.36	1817.76	1405.89	2506.71	3549.92	2428.18	3206.97	4564.13	3337.77
ENSMUSG00000066952.11	Myo1h	2557.3	0.672698	0.124936	5.38433	7.27148e-08	1.06327e-06	2047.55	1943.21	2123.08	2332.25	2311	2501.26	3509.34	2942.55	3305.45
ENSMUSG00000012640.16	Zfp715	1423.86	-0.749831	0.139298	-5.38292	7.32869e-08	1.07082e-06	1681.56	1981.98	1918.77	1189.45	1380.89	1344.66	1172.2	1034.76	1110.51
ENSMUSG00000019188.16	H13	7826.42	1.35789	0.252445	5.37898	7.49099e-08	1.0937e-06	4440.04	3393.77	5089.84	8331.74	6460.25	9578.25	12909.7	8223.05	12011.2
ENSMUSG00000028060.14	2810403A07Rik	2985.37	1.19409	0.222019	5.37833	7.51818e-08	1.09683e-06	1809.91	1911.28	2275.97	2500.18	2002.18	2639.62	5370.15	3404.04	4955.04
ENSMUSG00000109715.1	RP23-384C18.12	918.158	-1.92008	0.357441	-5.37175	7.79776e-08	1.13675e-06	2295.22	987.568	1709.59	889.988	403.948	656.738	389.351	509.76	421.262
ENSMUSG00000051853.10	Arf3	12775.8	1.05481	0.196373	5.37146	7.81037e-08	1.13773e-06	8592.29	7184.39	9105.98	14272.5	10578.8	13540.1	19159	14208.9	18340.5
ENSMUSG00000002222.14	Rmnd5a	4049.57	-1.03017	0.191804	-5.37093	7.83335e-08	1.14021e-06	5416.68	4869.42	6071.81	4283.88	3533.09	4257.11	2590.84	2207.55	3215.77
ENSMUSG00000029469.14	Ift81	63.3985	-1.96193	0.365312	-5.37057	7.84886e-08	1.1416e-06	104.283	72.9843	127.177	49.4438	57.8115	78.9255	26.9232	18.6291	34.41
ENSMUSG00000085039.2	AC130680.12	355.886	1.04698	0.195262	5.36191	8.23465e-08	1.1968e-06	207.563	273.691	198.062	371.295	420.048	349.806	470.121	504.679	407.707
ENSMUSG00000029703.10	Lrwd1	1064.67	-0.798369	0.148968	-5.35934	8.35274e-08	1.21305e-06	1357.68	1261.26	1496.24	985.144	1042.8	1068.91	687.578	849.317	833.14
ENSMUSG00000006005.18	Tpr	13506.5	0.592224	0.110519	5.35858	8.38763e-08	1.21719e-06	9694.28	11068.5	10823.9	14488.9	13817.7	14054.6	15598.9	15276.7	16734.7
ENSMUSG00000032733.6	Snx33	892.276	-1.16944	0.218496	-5.35224	8.68702e-08	1.25968e-06	1334.62	1224.77	1517.08	814.423	535.671	790.23	518.79	690.123	604.782
ENSMUSG00000107846.1	RP24-430K15.3	318.383	1.81865	0.339835	5.35156	8.71991e-08	1.2635e-06	193.525	104.915	177.213	234.158	236.368	222.161	751.779	321.775	623.551
ENSMUSG00000092060.4	Bend4	638.591	-1.56285	0.292095	-5.35049	8.77167e-08	1.27004e-06	813.204	1354.77	1059.8	389.02	555.429	485.246	246.451	464.881	378.51
ENSMUSG00000048376.6	F2r	28.9488	3.51739	0.657474	5.34986	8.80201e-08	1.27347e-06	9.02446	4.56152	4.86468	11.1948	8.78149	5.84634	124.261	30.484	61.521
ENSMUSG00000035623.14	Rsf1	1492.24	-0.884543	0.165393	-5.34814	8.88648e-08	1.28446e-06	1912.18	1856.54	2196.05	1379.76	1347.23	1505.43	898.822	1210.04	1124.06
ENSMUSG00000040093.15	Bmf	1835.24	-2.14225	0.400568	-5.34804	8.89138e-08	1.28446e-06	2136.79	1457.4	2871.55	3061.78	1828.75	3694.88	304.44	392.058	769.533
ENSMUSG00000028879.4	Stx12	7031.48	1.07117	0.200342	5.34673	8.95582e-08	1.29279e-06	4213.42	3936.59	3606.12	9502.54	9109.33	8215.08	10531.1	6738.65	7430.48
ENSMUSG00000051306.7	Usp42	624.042	0.714541	0.133693	5.34465	9.0591e-08	1.30672e-06	454.231	403.694	432.956	757.516	693.738	748.331	684.471	755.325	686.115
ENSMUSG00000062270.14	Morf4l1	4956.54	0.659615	0.123444	5.34343	9.12037e-08	1.31457e-06	3990.82	3710.79	3827.81	4787.65	5031.79	5039.54	6583.76	5416.83	6219.87
ENSMUSG00000097832.1	RP23-367G12.5	41.0409	-2.55956	0.480111	-5.33118	9.75779e-08	1.40539e-06	96.2609	52.4574	89.649	40.1148	19.0266	31.1805	6.21305	17.7823	16.6836
ENSMUSG00000008855.17	Hdac5	2985.37	-1.24362	0.233423	-5.32775	9.94351e-08	1.43106e-06	4964.46	3626.41	5021.74	2908.79	1928.27	2666.9	1565.69	1984.85	2201.2
ENSMUSG00000047735.14	Samd9l	16559.7	1.8933	0.355484	5.32599	1.00406e-07	1.44395e-06	5540.02	10341	3662.41	17783	22544.3	16601.6	30603.4	21453.9	20507.3
ENSMUSG00000022957.20	Itsn1	5753.66	-1.11974	0.210259	-5.32551	1.00668e-07	1.44664e-06	6967.89	5900.32	8580.59	7756.14	5265.97	7437.51	3289.81	3204.2	3380.52
ENSMUSG00000040761.16	Spen	2987.7	-1.17159	0.220007	-5.32525	1.00816e-07	1.44767e-06	4791.99	3875.01	5342.11	2726.87	1948.03	1983.86	1762.44	2445.49	2013.51
ENSMUSG00000059588.13	Calcrl	1520.12	-1.2254	0.230134	-5.32471	1.01114e-07	1.45087e-06	1879.09	2481.46	2283.62	1170.79	1584.33	1443.07	730.034	1183.79	924.9
ENSMUSG00000043740.14	RP23-394K2.4	861.336	-1.39973	0.262882	-5.32456	1.01199e-07	1.451e-06	1435.89	1373.02	1158.49	792.966	813.019	677.201	455.624	698.591	347.228
ENSMUSG00000022912.8	Pros1	7312.86	1.89455	0.355962	5.32234	1.02441e-07	1.46696e-06	3515.53	2319.53	3995.29	6845.63	4830.55	7740.55	16020.4	6455.83	14092.5
ENSMUSG00000114788.1	RP23-210I20.5	119.201	-1.56817	0.294641	-5.3223	1.02465e-07	1.46696e-06	173.47	148.249	176.518	122.21	103.914	179.288	46.5979	51.6534	70.9055
ENSMUSG00000026842.16	Abl1	3797.57	-1.13286	0.212911	-5.32083	1.03294e-07	1.47773e-06	5294.35	4445.2	6851.55	3530.1	2850.32	3636.42	2179.75	2561.5	2828.92
ENSMUSG00000086742.8	AC107822.5	87.1028	-2.42896	0.456535	-5.32042	1.03528e-07	1.47997e-06	133.361	191.584	131.346	58.7728	125.868	59.4378	14.4971	44.0324	25.0255
ENSMUSG00000112346.1	RP23-324E2.11	72.9179	-1.81823	0.341769	-5.32004	1.03743e-07	1.48193e-06	157.427	127.722	111.193	46.6451	48.2982	53.5914	22.7812	54.1937	34.41
ENSMUSG00000026435.15	Slc45a3	89.2153	2.00492	0.377193	5.31536	1.06444e-07	1.51939e-06	16.0435	29.6499	39.6124	102.619	122.209	147.133	82.8407	130.404	132.426
ENSMUSG00000049866.12	Arl4c	3562.55	-1.51507	0.285076	-5.31463	1.06873e-07	1.52438e-06	6752.3	4737.13	6337.98	3021.67	2553.95	2422.33	1559.48	3030.61	1647.51
ENSMUSG00000021725.9	Parp8	2048.47	1.65714	0.311992	5.31148	1.08736e-07	1.54979e-06	1334.62	884.934	1400.33	1279.94	797.652	1303.73	4898.99	2522.55	4013.46
ENSMUSG00000003444.8	Med29	275.955	1.16408	0.219256	5.30924	1.10082e-07	1.56781e-06	197.535	177.899	169.569	253.749	237.1	225.084	500.151	315.848	406.664
ENSMUSG00000016528.10	Mapkapk2	30427.1	1.9911	0.375321	5.30506	1.12635e-07	1.60298e-06	17522.5	9880.24	13544.6	29600	15490.5	25008.7	75520.7	29351.8	57924.6
ENSMUSG00000036712.15	Cyld	3890.43	1.01248	0.190861	5.30481	1.1279e-07	1.60399e-06	2725.39	2426.73	2995.95	3481.59	3235.25	3696.83	6275.18	4244.89	5932.08
ENSMUSG00000089809.9	Rasgef1b	6108.17	2.83007	0.533507	5.30465	1.12888e-07	1.6042e-06	3085.36	1473.37	1542.1	2729.67	1450.41	1298.86	24662.7	4440.5	14290.6
ENSMUSG00000029512.11	Ulk1	1686.85	-1.64054	0.30938	-5.30266	1.14129e-07	1.62063e-06	2717.37	1655.83	3662.41	1779.04	1125.49	1661.33	725.892	859.479	994.763
ENSMUSG00000067085.1	Gm10197	92.2926	-1.38974	0.262092	-5.30251	1.14221e-07	1.62074e-06	149.405	127.722	154.975	81.1624	58.5433	92.567	50.7399	55.0405	60.4782
ENSMUSG00000104069.1	RP23-157N11.10	27.3152	-2.95811	0.557977	-5.30149	1.14861e-07	1.62861e-06	51.1386	29.6499	80.6146	16.7922	16.0994	30.2061	5.17754	6.77422	9.38455
ENSMUSG00000027508.15	Pag1	1235.54	-1.12102	0.211528	-5.29963	1.16038e-07	1.64287e-06	1470.99	1382.14	2048.72	1224.9	1415.28	1321.27	656.513	889.963	710.098
ENSMUSG00000053799.6	Exoc6	2174.47	0.943164	0.177964	5.29976	1.15957e-07	1.64287e-06	1531.15	1550.92	1201.58	2227.77	2666.65	2168.99	3056.82	2723.23	2443.11
ENSMUSG00000001098.15	Kctd10	4841.02	0.60961	0.115034	5.29939	1.1619e-07	1.64382e-06	3965.75	4125.89	3953.59	4453.67	4140.47	4555.27	6517.49	5622.6	6234.47
ENSMUSG00000027452.11	Acss1	711.103	-1.15043	0.217161	-5.2976	1.17335e-07	1.65879e-06	888.408	1021.78	1117.49	560.674	691.542	757.101	365.535	556.332	441.074
ENSMUSG00000039285.12	Azi2	3428.27	0.898987	0.169745	5.29609	1.18309e-07	1.67132e-06	2330.32	2611.47	2142.54	3489.98	3968.5	3116.1	4787.16	4614.93	3793.44
ENSMUSG00000026482.13	Rgl1	5565.87	2.17863	0.411443	5.29511	1.18946e-07	1.67909e-06	2241.07	1865.66	997.259	9891.56	5668.45	6330.61	12457.2	5312.68	5328.34
ENSMUSG00000027284.16	Cdan1	1464.96	-0.847477	0.160069	-5.29446	1.1937e-07	1.68382e-06	1683.56	1706.01	2223.16	1504.77	1407.97	1534.66	986.84	1040.69	1096.95
ENSMUSG00000019868.16	Vta1	1486.57	0.9453	0.178629	5.29196	1.21011e-07	1.70572e-06	1022.77	1101.61	808.231	1673.63	1596.77	1546.36	2169.39	1781.62	1678.79
ENSMUSG00000027439.9	Gzf1	1141.49	-0.632279	0.119526	-5.2899	1.22384e-07	1.72381e-06	1386.76	1404.95	1498.32	1051.38	1084.51	1078.65	854.295	986.495	928.028
ENSMUSG00000048677.9	Tpcn2	1911.46	-1.16362	0.220009	-5.28898	1.23003e-07	1.73125e-06	2699.32	2853.23	2638.74	1882.6	1934.85	1540.51	1105.92	1597.02	950.968
ENSMUSG00000052760.16	AC161342.2	1504.51	1.20569	0.228066	5.28658	1.24624e-07	1.75278e-06	936.539	782.3	1057.72	1651.24	1399.18	1293.99	2726.49	1695.25	1997.87
ENSMUSG00000023991.16	Foxp4	829.677	1.99133	0.376712	5.28609	1.2496e-07	1.75622e-06	507.375	314.745	427.397	534.553	266.372	435.552	2262.59	891.656	1826.86
ENSMUSG00000079173.11	Zan	18.4571	-3.79406	0.717978	-5.28437	1.2614e-07	1.77151e-06	44.1196	43.3344	30.578	13.9935	18.2948	7.79512	2.07102	5.92744	0
ENSMUSG00000058207.6	Serpina3k	23.3954	8.30467	1.57177	5.28363	1.26647e-07	1.77732e-06	0	0	0	2.7987	2.92716	0.974389	26.9232	5.92744	171.007
ENSMUSG00000083677.1	RP23-331L12.10	30.7533	-3.61336	0.68406	-5.28223	1.27619e-07	1.78965e-06	62.1685	86.6688	97.9885	2.7987	6.58612	0.974389	2.07102	14.3952	3.12818
ENSMUSG00000041642.18	Kif21b	1411.57	-1.66554	0.31541	-5.28057	1.28786e-07	1.8047e-06	1560.23	2470.06	2709.62	1264.08	1180.38	1396.3	419.381	931.455	772.661
ENSMUSG00000097715.2	Gpr137b-ps	1955.35	-0.943707	0.178816	-5.27752	1.30941e-07	1.83355e-06	2857.75	2314.97	2732.56	2002.94	1666.29	1908.83	1612.29	1176.17	1326.35
ENSMUSG00000041057.9	Wdr43	2047.32	1.0455	0.19811	5.27735	1.31068e-07	1.83399e-06	1523.13	1316	1086.21	2215.64	2439.79	1747.08	2956.38	2604.69	2536.96
ENSMUSG00000067928.6	Zfp760	186.699	-1.77559	0.336758	-5.2726	1.34505e-07	1.88072e-06	244.663	348.956	348.867	113.814	170.507	179.288	52.8109	120.242	101.145
ENSMUSG00000042744.16	AC126938.1	2871.19	1.38153	0.262038	5.27227	1.34746e-07	1.88271e-06	1513.1	1662.67	2405.24	2155.94	1521.39	2028.68	4579.02	3866.38	6108.3
ENSMUSG00000020599.13	Rgs9	37.7045	5.37517	1.01972	5.27124	1.35506e-07	1.89065e-06	0	9.12303	0.694954	16.7922	13.904	6.82073	197.782	25.4033	68.82
ENSMUSG00000028149.12	Rap1gds1	7305.72	1.27773	0.242396	5.27123	1.35511e-07	1.89065e-06	4725.81	3234.11	4576.97	8593.89	6541.48	7663.57	12667.4	7727.69	10020.6
ENSMUSG00000084020.3	Wsb2-ps	88.6935	1.78786	0.339442	5.26705	1.38634e-07	1.93281e-06	34.0924	38.7729	22.9335	159.526	120.745	103.285	131.51	105	82.3755
ENSMUSG00000022575.5	Gsdmd	5405.04	1.21966	0.231625	5.26567	1.39679e-07	1.94597e-06	3660.92	3307.1	3732.6	4803.51	3649.44	4563.07	10194.6	5833.45	8900.73
ENSMUSG00000030980.17	Knop1	1782.13	-0.654722	0.124346	-5.26531	1.39955e-07	1.94839e-06	2388.47	2305.85	2168.95	1742.66	1599.69	1476.2	1392.76	1508.96	1455.65
ENSMUSG00000045980.13	Tmem104	3182.18	-1.51979	0.288658	-5.26501	1.40179e-07	1.9501e-06	5769.64	4404.14	6759.12	2083.17	1590.18	2127.09	1246.75	2520.85	2138.64
ENSMUSG00000040723.14	Rcsd1	1206.96	-1.50072	0.285353	-5.25916	1.44718e-07	2.01178e-06	2323.3	1564.6	2834.72	542.016	457.369	761.973	676.187	749.398	953.053
ENSMUSG00000002885.14	Adgre5	4882.81	-1.22968	0.2339	-5.25728	1.46205e-07	2.03097e-06	7877.35	5469.26	7833.52	5608.6	3475.27	4645.89	3333.3	2724.08	2978.03
ENSMUSG00000004085.14	Map3k20	649.391	-1.25369	0.238511	-5.25629	1.46989e-07	2.0404e-06	798.163	1224.77	766.534	608.252	750.817	531.042	406.955	401.372	356.613
ENSMUSG00000025278.9	Flnb	2281.16	1.64022	0.312241	5.25305	1.49597e-07	2.07509e-06	1129.06	1247.57	1535.15	1699.75	1263.8	1455.74	6104.32	2571.66	3523.38
ENSMUSG00000090939.1	RP23-263D5.2	90.7256	-1.66276	0.316545	-5.25285	1.49764e-07	2.07591e-06	137.372	127.722	224.47	71.8334	46.1028	52.617	51.7754	52.5002	52.1364
ENSMUSG00000025260.10	Hsd17b10	1519.98	0.84865	0.161586	5.25202	1.50442e-07	2.0838e-06	933.53	1190.56	949.307	1640.04	1743.13	1711.03	1805.93	2061.9	1644.38
ENSMUSG00000072620.3	Slfn2	31942.5	1.55391	0.295953	5.25053	1.51661e-07	2.09916e-06	19914	18595	10173.4	34357.8	31821.9	29696.5	63707.6	37104.9	42111.6
ENSMUSG00000030768.12	Disp1	488.692	-1.04599	0.199258	-5.24942	1.52583e-07	2.1104e-06	635.723	570.19	735.261	519.626	417.853	576.839	276.481	347.179	319.075
ENSMUSG00000006134.4	Crkl	4953.19	1.27364	0.242721	5.24734	1.54309e-07	2.13273e-06	3187.64	2825.86	3219.03	5018.08	3701.4	4297.06	9606.41	5205.14	7518.07
ENSMUSG00000044636.6	Csrnp2	112.021	-1.58709	0.302469	-5.24712	1.54498e-07	2.13381e-06	138.375	173.338	197.367	98.8876	107.573	123.747	35.2073	71.1293	62.5637
ENSMUSG00000036180.15	Gatad2a	4139.16	0.783735	0.149396	5.24601	1.55426e-07	2.14508e-06	3018.18	3630.97	2872.94	4106.63	3792.87	3460.06	5815.42	5344.86	5210.51
ENSMUSG00000037643.14	Prkci	988.119	-0.691539	0.131831	-5.24565	1.55736e-07	2.14781e-06	1203.26	1128.98	1136.25	1208.11	1037.68	1029.93	684.471	714.68	749.721
ENSMUSG00000028521.17	Slc35d1	556.443	1.11913	0.213699	5.23695	1.63251e-07	2.24821e-06	308.837	303.341	373.885	611.051	582.505	676.226	835.656	542.784	773.704
ENSMUSG00000038949.8	Cnst	606.379	-1.00713	0.19231	-5.23699	1.63218e-07	2.24821e-06	732.987	729.843	925.678	603.587	591.287	683.047	325.15	417.461	448.373
ENSMUSG00000027566.15	Psma7	4318.51	0.855534	0.163441	5.23452	1.65418e-07	2.27643e-06	3095.39	3658.34	2734.64	3569.28	4506.37	4156.75	5573.11	5814.82	5757.94
ENSMUSG00000008398.15	Elk3	1831.46	-1.26295	0.241374	-5.23236	1.6736e-07	2.3015e-06	2413.54	2481.46	3432.38	1470.25	1413.09	1800.67	854.295	1233.75	1383.7
ENSMUSG00000055061.5	AC122871.5	494.802	-1.22294	0.233735	-5.23215	1.67552e-07	2.30248e-06	648.759	659.139	751.94	580.265	356.382	572.941	277.516	268.428	337.844
ENSMUSG00000028954.11	Nub1	5848.62	0.516333	0.0987486	5.22876	1.70647e-07	2.34334e-06	5153.97	5421.36	5222.58	4570.29	4818.84	4863.18	7743.53	7693.82	7149.99
ENSMUSG00000070733.13	Fryl	3077.06	1.0456	0.199984	5.22842	1.7096e-07	2.34596e-06	2172.89	1945.49	2588.01	2640.11	2110.48	2376.54	5052.25	3677.55	5130.22
ENSMUSG00000057396.7	Zfp759	153.17	-1.32028	0.252551	-5.22778	1.71554e-07	2.35243e-06	195.53	209.83	177.213	164.191	202.706	196.827	55.9175	76.2099	100.102
ENSMUSG00000056476.13	Med12l	126.996	1.48761	0.284684	5.22548	1.73703e-07	2.38019e-06	58.1576	72.9843	75.055	112.881	144.895	103.285	179.143	246.412	150.153
ENSMUSG00000007570.15	Fance	490.847	-1.12656	0.215752	-5.22153	1.77454e-07	2.42986e-06	688.867	558.786	782.518	512.163	404.68	537.863	259.913	354.8	318.032
ENSMUSG00000033004.15	Mycbp2	8482.4	0.908416	0.174009	5.22052	1.78418e-07	2.44066e-06	6064.44	5706.46	7541.64	7676.85	6396.58	6688.21	12714	10533.9	13019.5
ENSMUSG00000087660.1	AC087062.5	272.945	1.08723	0.208264	5.22044	1.78498e-07	2.44066e-06	167.454	191.584	215.436	203.373	207.829	246.521	476.334	345.485	402.493
ENSMUSG00000060012.9	Kif13b	4210.27	-1.44697	0.277207	-5.21984	1.79078e-07	2.44685e-06	7689.84	4985.74	8594.49	3675.63	2125.85	3015.74	2640.55	2185.53	2979.07
ENSMUSG00000062169.13	Cnih4	1570.82	0.850928	0.163031	5.21943	1.79475e-07	2.45052e-06	1030.79	1227.05	1183.51	1252.89	1695.56	1547.33	2049.27	2010.25	2140.72
ENSMUSG00000101014.1	RP23-202B12.1	80.7225	2.5434	0.487608	5.21607	1.82755e-07	2.49354e-06	22.0598	25.0883	22.2385	108.217	44.6392	102.311	185.356	64.355	152.238
ENSMUSG00000005823.8	Gpr108	4476.32	0.926902	0.177736	5.21505	1.83766e-07	2.50554e-06	2967.04	2848.67	3527.59	4259.63	3743.11	5164.26	6273.11	5361.79	6141.67
ENSMUSG00000049800.13	Sertad2	2018.29	1.67443	0.321096	5.21474	1.84079e-07	2.50803e-06	982.664	1060.55	988.224	2030.93	1596.04	1831.85	4805.8	1757.06	3111.5
ENSMUSG00000021306.11	Gpr137b	1897.8	-1.20552	0.231438	-5.20881	1.90055e-07	2.58761e-06	2783.55	2474.62	3219.03	1794.9	1296	1832.83	1421.75	928.068	1329.48
ENSMUSG00000027994.14	Mcub	1251.67	0.734647	0.141083	5.20719	1.91725e-07	2.60849e-06	1026.78	951.076	894.406	1164.26	1334.79	1116.65	1602.97	1685.09	1489.02
ENSMUSG00000062908.12	Acadm	1888.48	-0.653909	0.125599	-5.20634	1.92602e-07	2.61857e-06	2254.11	2237.42	2417.05	1813.56	1897.53	1983.86	1317.17	1542.83	1532.81
ENSMUSG00000028583.14	Pdpn	59.3182	1.65362	0.317703	5.20494	1.94062e-07	2.63655e-06	30.0815	29.6499	22.2385	55.0412	76.838	68.2073	69.3791	94.839	87.5892
ENSMUSG00000025647.16	Shisa5	14027.8	0.755956	0.145269	5.20383	1.95224e-07	2.65046e-06	9156.82	10639.7	11386.1	13975.8	12886.8	15544.4	17007.2	16992.3	18660.7
ENSMUSG00000022864.14	D16Ertd472e	379.645	1.23708	0.237774	5.20275	1.96359e-07	2.66225e-06	145.394	145.969	136.211	653.031	713.496	615.814	429.736	245.565	331.588
ENSMUSG00000066150.12	Slc31a1	19309.6	1.83083	0.351898	5.20274	1.9637e-07	2.66225e-06	8771.78	6146.64	9636.23	23136	13121.7	25607	37811.6	16934.7	32620.7
ENSMUSG00000027435.8	Cd93	33033.6	-1.0473	0.201386	-5.20048	1.98776e-07	2.69296e-06	41509.5	43729	46974	31967.7	35561.4	33588.2	17485.6	27720.9	18766
ENSMUSG00000057156.10	Homez	210.712	-1.19918	0.23069	-5.19824	2.0118e-07	2.72167e-06	310.843	275.972	316.899	181.916	171.239	244.572	106.657	132.944	155.366
ENSMUSG00000087261.2	AC161516.1	42.7585	1.83377	0.352763	5.19831	2.01112e-07	2.72167e-06	23.0625	20.5268	16.6789	39.1819	36.5895	37.0268	84.9117	73.6696	53.1791
ENSMUSG00000032411.15	Tfdp2	593.836	-1.44297	0.277919	-5.19205	2.07989e-07	2.81181e-06	659.788	793.704	927.763	573.734	804.238	710.33	206.066	398.832	270.067
ENSMUSG00000022105.6	Rb1	2648.3	-1.00788	0.194195	-5.19001	2.10286e-07	2.84086e-06	3777.24	3063.06	3996.68	2722.21	2421.5	2459.36	2072.05	1417.5	1905.06
ENSMUSG00000052749.9	Trim30b	319.598	2.56151	0.493603	5.1894	2.10971e-07	2.84811e-06	66.1794	130.003	41.0023	357.301	671.784	241.649	405.919	666.413	296.135
ENSMUSG00000007777.9	RP23-79E13.7	498.688	-0.723627	0.139587	-5.18404	2.17128e-07	2.92916e-06	643.745	645.455	575.422	465.518	493.227	538.837	377.961	376.816	371.211
ENSMUSG00000090946.3	Ccdc71l	3459.05	1.419	0.273749	5.18359	2.17651e-07	2.93416e-06	1703.62	1284.07	1451.06	5070.32	5069.85	4674.15	5532.72	2556.42	3789.27
ENSMUSG00000021990.15	Spata13	1306.79	1.80295	0.347915	5.18217	2.19325e-07	2.95464e-06	755.047	360.36	872.167	1080.3	725.936	1004.6	2873.54	1610.57	2478.56
ENSMUSG00000030340.16	Scnn1a	59.7951	1.70858	0.329769	5.18115	2.20519e-07	2.96865e-06	27.0734	15.9653	31.9679	83.9611	55.6161	63.3353	85.9472	80.4438	93.8455
ENSMUSG00000046546.3	Fam43a	93.6044	-3.23583	0.624796	-5.17902	2.23058e-07	3.00072e-06	349.949	63.8612	238.369	69.9676	14.6358	36.0524	25.8877	22.863	20.8546
ENSMUSG00000043872.14	Zmym1	430.262	-0.878349	0.169639	-5.17775	2.24575e-07	3.01901e-06	517.402	597.559	471.179	462.719	529.816	435.552	283.729	270.969	303.434
ENSMUSG00000018752.19	Tnfsfm13	3680.62	-0.70034	0.135285	-5.17679	2.25742e-07	3.03257e-06	4834.1	4164.66	4346.94	4052.52	3465.03	4046.64	2650.9	2929.85	2634.97
ENSMUSG00000066621.12	Tecpr1	14098.1	-1.01906	0.196892	-5.17573	2.27019e-07	3.04758e-06	20160.6	15693.9	20618.6	17160.7	11406.4	13972.7	9171.5	9732.01	8966.42
ENSMUSG00000032528.5	Vipr1	174.412	-3.22679	0.623851	-5.17238	2.3113e-07	3.1006e-06	342.93	109.476	508.706	227.628	59.275	218.263	36.2428	16.0888	51.0937
ENSMUSG00000116838.1	RP24-75N14.5	151.773	1.3413	0.259423	5.17033	2.33676e-07	3.13257e-06	82.2229	98.0726	104.938	125.009	129.527	102.311	300.298	183.751	239.827
ENSMUSG00000037552.17	Plekhg2	1148.59	1.75316	0.339131	5.16955	2.34655e-07	3.14349e-06	556.508	412.817	721.362	1115.75	739.84	1073.78	2403.42	1085.57	2228.31
ENSMUSG00000030530.15	Furin	14088.5	1.26946	0.245665	5.16745	2.37311e-07	3.17685e-06	7681.82	6741.92	11038.6	14335	10422.2	15174.2	23023.5	17394.5	20984.9
ENSMUSG00000024132.5	Eci1	436.765	0.911576	0.176425	5.16693	2.3797e-07	3.18345e-06	367.997	253.164	298.135	413.275	425.902	427.757	624.412	570.728	549.518
ENSMUSG00000058587.9	Tmod3	8192.97	0.905702	0.175318	5.16607	2.39072e-07	3.19596e-06	5741.56	5888.92	5663.18	7945.52	7877.73	8221.9	13082.6	8580.39	10734.9
ENSMUSG00000037640.15	Zfp60	341.395	-1.27008	0.245909	-5.16485	2.40626e-07	3.2145e-06	450.22	485.801	491.332	287.334	387.117	380.012	136.687	241.331	212.717
ENSMUSG00000020038.10	Cry1	628.109	1.11767	0.216665	5.15854	2.48882e-07	3.32247e-06	529.435	360.36	401.683	562.54	483.714	500.836	1125.6	785.809	903.002
ENSMUSG00000031666.15	Rbl2	1814.67	-0.976645	0.189354	-5.15777	2.49905e-07	3.33377e-06	2616.09	1854.26	2688.08	1977.75	1640.67	1910.78	1189.8	1139.76	1314.88
ENSMUSG00000059713.12	Rcan3	1061.3	-0.899132	0.17433	-5.15764	2.50076e-07	3.33377e-06	1418.85	1281.79	1565.04	1001.94	980.6	1013.37	615.092	854.398	820.627
ENSMUSG00000083678.3	RP23-110F21.3	186.681	1.34998	0.26179	5.15675	2.51275e-07	3.34742e-06	129.351	111.757	83.3945	165.124	209.292	159.8	325.15	275.203	221.058
ENSMUSG00000021108.18	Prkch	1716.51	-1.05824	0.205231	-5.15633	2.51834e-07	3.35254e-06	2969.05	2164.44	2260.68	1746.39	1479.68	1275.48	1339.95	1179.56	1033.34
ENSMUSG00000047409.13	Ctdspl	260.634	-0.984798	0.191079	-5.15387	2.5517e-07	3.3946e-06	292.794	369.483	402.378	237.89	261.249	243.597	172.93	169.355	196.033
ENSMUSG00000001924.15	Uba1	13853.2	0.569093	0.110448	5.15257	2.56934e-07	3.41569e-06	10529.5	11907.8	11867	12800.3	13635.5	13052.9	16472.9	17827.2	16585.6
ENSMUSG00000031662.8	Snx20	2464.75	0.815166	0.158223	5.152	2.57718e-07	3.42374e-06	2056.57	1924.96	1675.53	2315.46	2201.23	2059.86	3693.66	2869.73	3385.74
ENSMUSG00000113029.1	RP23-41J14.6	2285.01	2.30692	0.447813	5.15154	2.58354e-07	3.42981e-06	1058.87	670.543	964.596	1877.93	1062.56	1587.28	7122.23	1635.13	4585.92
ENSMUSG00000111639.1	RP24-233B16.1	42.2096	3.82863	0.743597	5.1488	2.62153e-07	3.47783e-06	11.0299	6.84227	0.694954	52.2425	25.6127	33.1292	117.012	32.1775	101.145
ENSMUSG00000068957.1	RP24-96D10.2	84.8333	-2.04998	0.398255	-5.14739	2.64129e-07	3.50163e-06	139.378	209.83	116.752	61.5715	65.1294	60.4121	19.6747	58.4276	32.3246
ENSMUSG00000020689.4	Itgb3	553.247	-2.02625	0.393675	-5.14701	2.64667e-07	3.50634e-06	605.642	681.947	1200.88	514.029	392.24	972.441	180.179	165.968	265.896
ENSMUSG00000029478.16	Ncor2	2932.02	-1.18188	0.230031	-5.1379	2.77819e-07	3.67804e-06	4207.4	3528.33	5198.25	3039.39	2144.88	2565.57	1527.38	1961.14	2215.8
ENSMUSG00000002602.16	Axl	4974.97	0.915985	0.178388	5.13479	2.82464e-07	3.73525e-06	3538.59	3425.7	4175.98	4272.69	3460.64	4869.02	7331.4	6356.75	7343.93
ENSMUSG00000024074.7	Crim1	724.227	1.40275	0.273192	5.13468	2.82618e-07	3.73525e-06	373.011	348.956	533.03	520.559	567.138	842.847	909.177	1081.33	1341.99
ENSMUSG00000070709.12	AC139063.2	185.406	-1.13388	0.220831	-5.13461	2.82726e-07	3.73525e-06	244.663	232.637	288.406	149.264	178.557	224.11	121.155	115.162	114.7
ENSMUSG00000028849.17	Map7d1	7107.17	0.681655	0.132769	5.13415	2.8342e-07	3.74184e-06	6822.49	5982.43	6060.69	5352.99	4824.7	4653.68	10907	9308.62	10051.9
ENSMUSG00000016756.17	Cmah	69.7364	-2.51757	0.4905	-5.13266	2.85675e-07	3.76902e-06	87.2365	177.899	118.837	37.3161	93.6692	46.7707	14.4971	34.7179	16.6836
ENSMUSG00000010307.7	Tmem86a	3172.24	-1.82388	0.355487	-5.13065	2.88737e-07	3.8068e-06	7101.25	3291.13	6591.64	2777.25	1349.42	2640.6	1260.21	1785.85	1752.83
ENSMUSG00000041945.12	Mfsd9	180.321	-1.31098	0.255542	-5.13018	2.89462e-07	3.81111e-06	200.544	212.11	309.949	199.641	193.925	213.391	77.6632	99.9197	115.743
ENSMUSG00000053716.9	Dusp7	1189.82	-1.41248	0.275325	-5.13023	2.89388e-07	3.81111e-06	2966.04	1810.92	2061.23	470.182	323.452	506.683	659.619	1018.67	891.532
ENSMUSG00000031168.14	Ebp	3348.42	0.966779	0.18855	5.12745	2.93699e-07	3.86424e-06	1930.23	2180.4	2431.64	3241.83	3318.67	4242.49	4222.8	3687.71	4879.97
ENSMUSG00000022667.18	Cd200r1	3441.35	-1.72286	0.336067	-5.12654	2.95115e-07	3.88021e-06	4192.36	5797.69	4961.28	2843.48	5028.13	3621.81	1085.21	2310.85	1131.36
ENSMUSG00000008305.18	Tle1	481.27	-1.04503	0.20386	-5.12622	2.95609e-07	3.88405e-06	801.172	522.294	740.821	444.061	402.485	414.116	353.108	294.678	358.698
ENSMUSG00000018809.2	Smyd4	132.463	-1.17354	0.229009	-5.12444	2.9842e-07	3.91829e-06	180.489	159.653	186.248	136.204	153.676	141.286	59.024	83.8309	91.7601
ENSMUSG00000071722.4	Spin4	54.6862	1.95906	0.38242	5.1228	3.01028e-07	3.94983e-06	11.0299	15.9653	16.6789	82.0953	109.769	87.695	67.3081	60.9679	40.6664
ENSMUSG00000020564.17	Atxn7l1	1824.31	1.01837	0.198799	5.12261	3.01333e-07	3.95113e-06	1194.24	1103.89	1391.99	1895.66	1584.33	1760.72	3050.61	2029.72	2407.66
ENSMUSG00000031959.15	Wdr59	616.787	-0.731613	0.142832	-5.1222	3.01999e-07	3.95716e-06	669.816	743.527	833.25	637.172	637.39	675.252	446.304	458.953	449.416
ENSMUSG00000040029.14	Ipo8	3110.63	0.499793	0.0975875	5.12149	3.03132e-07	3.9693e-06	2454.65	2365.15	2477.51	3498.38	3380.14	3492.21	3583.9	3310.05	3433.7
ENSMUSG00000045282.7	Tmem86b	289.933	1.7845	0.348497	5.12056	3.04638e-07	3.98628e-06	132.359	134.565	184.163	236.024	134.649	225.084	627.518	303.146	631.893
ENSMUSG00000042978.10	Sbk1	168.548	-1.64048	0.32043	-5.11962	3.06146e-07	4.00329e-06	309.84	191.584	287.016	181.916	108.305	183.185	77.6632	66.8954	110.529
ENSMUSG00000028842.15	Ago3	1365.55	-1.14655	0.223976	-5.11907	3.07046e-07	4.01232e-06	1876.09	1740.22	2548.4	1291.14	911.079	1134.19	989.946	783.269	1015.62
ENSMUSG00000020100.15	Slc29a3	3682.48	-1.03908	0.203058	-5.11718	3.10133e-07	4.04714e-06	5813.76	4150.98	6396.35	3199.85	2630.79	2983.58	2387.88	2967.11	2612.03
ENSMUSG00000087256.1	RP23-179F8.1	16.3999	4.81743	0.941407	5.11727	3.0999e-07	4.04714e-06	3.00815	0	0	23.3225	16.8312	14.6158	33.1363	25.4033	31.2818
ENSMUSG00000046688.14	Tifa	9056	1.69722	0.331739	5.11615	3.11843e-07	4.06668e-06	4981.5	2780.24	3796.53	12357.2	8792.47	11300	17013.4	7284.82	13197.8
ENSMUSG00000031838.8	Ifi30	8334.7	0.871943	0.17049	5.11435	3.14824e-07	4.10278e-06	5466.82	6830.87	5802.86	8179.68	6789.55	8830.89	11579.1	9790.44	11742.2
ENSMUSG00000054364.5	Rhob	1630.99	-1.7749	0.347317	-5.11031	3.21628e-07	4.18859e-06	4707.76	2159.88	3220.42	738.858	346.869	555.402	1192.91	816.293	940.541
ENSMUSG00000010358.13	Ifi35	3081.17	1.77221	0.346805	5.11012	3.21955e-07	4.19e-06	1239.36	2310.41	811.011	2691.42	3395.51	2422.33	5473.7	5181.43	4205.32
ENSMUSG00000021280.9	Exoc3l4	186.274	2.08259	0.407615	5.10922	3.23495e-07	4.2015e-06	90.2446	77.5458	53.5114	214.567	127.332	180.262	471.156	162.581	299.263
ENSMUSG00000060802.8	B2m	112781	0.955898	0.187091	5.10927	3.23399e-07	4.2015e-06	78460.7	82930.6	77091.9	98053.6	98493.2	117398	180893	119727	161984
ENSMUSG00000073731.12	RP23-291H3.3	84.5281	-1.33634	0.261548	-5.10933	3.23298e-07	4.2015e-06	99.2691	139.126	135.516	68.1018	82.6924	88.6694	48.6689	46.5727	52.1364
ENSMUSG00000003062.13	Stard3nl	2599.97	0.86957	0.170277	5.10679	3.27672e-07	4.25285e-06	1725.68	1651.27	2046.64	2272.55	2791.78	2988.45	3419.25	3002.67	3501.48
ENSMUSG00000020225.10	Tmbim4	2968.33	1.0941	0.214257	5.10646	3.28242e-07	4.25738e-06	1962.32	1655.83	2245.4	2354.64	2690.79	3272	4464.08	3351.54	4718.34
ENSMUSG00000027291.15	Vps39	4009.47	-0.770197	0.15088	-5.10471	3.31294e-07	4.29406e-06	5380.58	4376.77	5680.55	3976.96	3641.39	3969.66	2755.49	3147.47	3156.34
ENSMUSG00000024668.7	Sdhaf2	1753.13	0.743839	0.145727	5.10434	3.31943e-07	4.29955e-06	1199.25	1254.42	1177.95	1991.74	2119.27	1958.52	2347.5	1830.73	1898.81
ENSMUSG00000053286.11	Trmt1l	1429.99	0.914859	0.179266	5.10335	3.33699e-07	4.31939e-06	901.443	873.53	1138.33	1462.79	1294.54	1691.54	1839.06	1692.71	1975.97
ENSMUSG00000020629.12	Adi1	1359.89	-0.882194	0.173015	-5.09895	3.41538e-07	4.41788e-06	1861.04	1418.63	1723.49	1607.39	1426.26	1484	789.058	1031.37	897.789
ENSMUSG00000021281.15	Tnfaip2	38307.4	2.22626	0.436631	5.09872	3.41959e-07	4.42033e-06	18631.5	12097.1	16512.8	31998.5	18540.6	25922.7	116854	27549	76660.3
ENSMUSG00000087698.1	RP23-183L1.2	90.4293	-1.42255	0.279241	-5.09434	3.49964e-07	4.52076e-06	138.375	116.319	152.195	102.619	68.7883	82.8231	53.8465	59.2744	39.6237
ENSMUSG00000044345.9	Marveld1	853.543	-1.97229	0.387271	-5.0928	3.52818e-07	4.55456e-06	1112.01	1160.91	2212.73	570.003	551.038	931.516	215.386	494.518	433.775
ENSMUSG00000072844.6	RP23-154O12.1	56.9438	3.20362	0.629191	5.09165	3.54958e-07	4.5791e-06	3.00815	15.9653	4.16972	81.1624	164.653	66.2585	67.3081	74.5164	35.4528
ENSMUSG00000048965.9	Mrgpre	72.9734	-2.41993	0.475422	-5.09006	3.57948e-07	4.61456e-06	126.342	79.8265	159.144	72.7663	37.3213	112.055	22.7812	15.242	31.2818
ENSMUSG00000059325.14	Hopx	78.7837	2.05604	0.403942	5.08993	3.58192e-07	4.61461e-06	29.0788	43.3344	27.1032	52.2425	92.9374	64.3097	111.835	196.452	91.7601
ENSMUSG00000050490.7	RP23-132J19.2	184.877	1.17521	0.230906	5.08955	3.58907e-07	4.62071e-06	117.318	120.88	112.583	135.271	216.61	171.493	289.942	246.412	253.383
ENSMUSG00000024952.12	Rps6ka4	2706.68	1.02776	0.201958	5.08896	3.60036e-07	4.62903e-06	2245.09	1943.21	1799.24	2134.48	2017.55	2011.14	4932.13	3090.74	4186.55
ENSMUSG00000070504.9	Fcrl6	11.086	6.79054	1.33436	5.08898	3.59992e-07	4.62903e-06	0	0	0	13.9935	3.65895	10.7183	30.0298	19.4759	21.8973
ENSMUSG00000027012.15	Dync1i2	8451.49	0.66967	0.131618	5.08797	3.61908e-07	4.64999e-06	6710.19	6404.37	6553.41	7886.75	9144.46	8072.82	11134.8	9297.61	10859
ENSMUSG00000108402.1	RP23-325D10.4	2097.58	0.832326	0.163644	5.08621	3.65282e-07	4.69019e-06	1421.85	1804.08	1414.93	2137.28	1724.1	2133.91	2796.91	2680.9	2764.27
ENSMUSG00000057335.11	Cep170	5033.48	0.720047	0.141633	5.08389	3.69778e-07	4.74475e-06	3547.62	3993.61	3808.35	5435.08	5278.41	4549.42	6844.71	5678.49	6165.65
ENSMUSG00000014353.14	Tmem87b	3112.32	-1.00497	0.197731	-5.08252	3.7246e-07	4.77329e-06	4180.33	3475.88	5491.52	2755.79	2514.43	3035.22	2197.35	2065.29	2295.04
ENSMUSG00000057191.13	RP23-411N10.2	6389.13	1.2379	0.243561	5.0825	3.72501e-07	4.77329e-06	4111.14	3765.53	4303.85	5728.95	4328.54	6528.41	11657.8	6812.32	10265.7
ENSMUSG00000032643.12	Fhl3	2046.71	0.898201	0.176737	5.08212	3.73241e-07	4.77958e-06	1346.65	1881.63	1569.21	1408.68	1596.04	1696.41	2703.71	3256.7	2961.35
ENSMUSG00000026864.13	Hspa5	59310.5	1.0956	0.215596	5.08172	3.74031e-07	4.7865e-06	37728.3	37502.5	45869	43741.9	52751.9	57399.3	84145.4	67331.5	107325
ENSMUSG00000018848.4	Rars	6618.72	1.30773	0.257433	5.0799	3.77629e-07	4.82932e-06	3343.06	4732.57	2582.45	6808.32	9237.39	6506.97	9150.79	9576.2	7630.68
ENSMUSG00000029428.13	Stx2	6829.05	0.895387	0.176417	5.07539	3.86701e-07	4.94204e-06	4843.13	4960.65	6308.1	5012.48	4632.24	5721.61	9868.4	8932.65	11182.2
ENSMUSG00000040964.16	Arhgef10l	2402.06	-0.836723	0.164868	-5.07511	3.87265e-07	4.94595e-06	4454.07	3478.16	3572.06	1303.26	1296.73	1070.85	2054.45	2320.17	2068.77
ENSMUSG00000108621.1	RP23-402K24.2	1369.86	-0.867291	0.170913	-5.07446	3.88604e-07	4.95974e-06	1685.57	1799.52	2067.49	1096.16	1229.41	1405.07	896.751	1033.07	1115.72
ENSMUSG00000097415.2	RP23-285C18.2	4465.15	1.99123	0.392418	5.07425	3.89033e-07	4.96192e-06	1739.72	1566.88	2644.99	3449.87	2296.36	4812.51	7555.07	4346.51	11774.5
ENSMUSG00000000628.10	Hk2	4019.32	2.06384	0.406798	5.07338	3.90811e-07	4.98128e-06	1852.02	1509.86	1949.35	4294.15	2082.68	2271.3	12015	3935.82	6263.67
ENSMUSG00000026289.15	Atg16l1	2328	1.00372	0.198024	5.0687	4.00549e-07	5.10201e-06	1464.97	1411.79	1537.24	2777.25	2328.56	2575.31	3671.91	2304.93	2880.01
ENSMUSG00000021226.7	Acot2	128.374	-1.16254	0.229382	-5.06814	4.01713e-07	5.11344e-06	239.65	184.741	182.773	88.6257	88.5467	99.3877	74.5566	99.0729	98.0164
ENSMUSG00000107017.1	RP23-253G12.8	39.3594	2.01543	0.397696	5.06777	4.02501e-07	5.12008e-06	13.0353	11.4038	18.0688	47.578	43.9074	39.95	76.6276	43.1856	60.4782
ENSMUSG00000015733.13	Capza2	23826	1.18107	0.233098	5.06685	4.0445e-07	5.14145e-06	17656.9	17146.7	11361.1	21086.4	23786.1	18732.6	42872.1	30836.2	30955.5
ENSMUSG00000008730.17	Hipk1	14682.9	0.942381	0.18612	5.06328	4.12099e-07	5.23521e-06	8582.26	8409.15	10854.5	17938.8	15331	17504.9	17952.6	14862.6	20710.7
ENSMUSG00000030365.11	Clec2i	295.763	-1.34064	0.264794	-5.06294	4.12848e-07	5.24126e-06	364.989	561.066	517.046	161.392	257.59	231.905	155.326	213.388	199.161
ENSMUSG00000076435.3	Acsf2	241.081	-1.21432	0.239882	-5.06215	4.14554e-07	5.25943e-06	352.957	273.691	365.546	276.139	201.242	270.88	118.048	173.589	137.64
ENSMUSG00000032192.9	Gnb5	206.461	-1.30366	0.257547	-5.06184	4.15228e-07	5.2645e-06	262.712	275.972	308.559	199.641	215.146	253.341	76.6276	143.105	123.042
ENSMUSG00000084979.1	RP24-112H7.2	29.5941	2.01458	0.398233	5.0588	4.21899e-07	5.34555e-06	11.0299	9.12303	14.594	25.1883	27.0763	31.1805	49.7044	43.1856	55.2646
ENSMUSG00000027366.12	Sppl2a	16794.5	1.00963	0.199616	5.05784	4.24031e-07	5.369e-06	11193.3	13267.2	11081.7	12868.4	17084.4	14106.2	28921.8	19827.3	22800.3
ENSMUSG00000024404.6	Riok3	7007.07	0.999004	0.197631	5.0549	4.30608e-07	5.44868e-06	4769.93	4572.92	4009.88	7344.73	9260.81	6423.18	10097.2	9109.63	7475.32
ENSMUSG00000058192.16	Zfp846	200.463	-1.09567	0.216833	-5.05307	4.34768e-07	5.49769e-06	271.737	280.533	305.78	181.916	154.408	207.545	109.764	132.944	159.537
ENSMUSG00000036918.15	Ttc7	3887.2	-0.891978	0.176558	-5.05204	4.3712e-07	5.52379e-06	5206.11	4780.47	5297.63	3849.15	4094.37	3520.47	2296.76	3341.38	2598.48
ENSMUSG00000003226.7	Ranbp2	19858.9	1.27994	0.253378	5.05149	4.38371e-07	5.53595e-06	10372.1	14115.6	9589.67	19832.6	25077.7	17010.9	35360.6	22850.3	24520.8
ENSMUSG00000020101.14	Vsir	15833.6	-1.81987	0.360398	-5.0496	4.42728e-07	5.58729e-06	29218.2	15636.9	32500.2	16870.6	7708.68	18655.7	6728.74	7008.77	8174.99
ENSMUSG00000001053.15	N4bp3	172.471	-1.65075	0.326922	-5.04936	4.4329e-07	5.59071e-06	458.242	232.637	384.309	46.6451	30.0034	55.5402	117.012	92.2987	135.555
ENSMUSG00000108291.1	RP23-20K24.9	14.7766	4.26861	0.845665	5.04764	4.47305e-07	5.63763e-06	0	2.28076	3.47477	1.8658	5.12254	3.89756	51.7754	22.863	41.7091
ENSMUSG00000019189.13	Rnf145	5289.56	1.25325	0.248339	5.04655	4.49854e-07	5.66603e-06	3593.74	2695.86	3547.74	4969.57	3544.79	5789.82	9157	6086.63	8220.87
ENSMUSG00000030559.8	Rab38	87.2352	2.28158	0.452165	5.04589	4.51404e-07	5.68182e-06	42.1142	11.4038	22.2385	131.539	71.7155	121.799	153.255	82.9841	148.067
ENSMUSG00000074238.6	Ap1ar	1401.64	0.808189	0.160182	5.04543	4.52506e-07	5.69195e-06	1001.72	1042.31	897.185	1463.72	1582.86	1484.97	1901.19	1432.75	1808.09
ENSMUSG00000030083.11	Abtb1	1290.67	-1.63121	0.323591	-5.04097	4.63187e-07	5.82249e-06	1920.2	1311.44	2631.79	1286.47	865.708	1705.18	534.322	598.671	762.234
ENSMUSG00000043542.12	Zc2hc1a	490.919	0.907791	0.180178	5.03831	4.6966e-07	5.89998e-06	304.826	346.675	347.477	424.47	570.065	552.479	677.223	580.889	614.167
ENSMUSG00000035441.14	Myo1d	158.394	2.66466	0.529152	5.03572	4.76063e-07	5.97259e-06	34.0924	93.5111	41.6972	53.1754	110.5	46.7707	207.102	597.825	240.87
ENSMUSG00000103270.1	RP23-413K6.4	128.414	-1.39516	0.277047	-5.03582	4.7581e-07	5.97259e-06	134.364	157.372	223.08	150.197	131.722	161.749	54.882	65.2018	77.1619
ENSMUSG00000086922.2	RP23-459L15.3	617.567	1.47071	0.292073	5.03542	4.7681e-07	5.97806e-06	365.992	405.975	209.876	573.734	756.672	542.735	1118.35	843.39	741.38
ENSMUSG00000096976.1	Gm26882	1244.71	0.829304	0.164709	5.03498	4.77903e-07	5.98785e-06	933.53	766.335	963.901	1157.73	1407.97	1221.88	1756.22	1481.86	1513
ENSMUSG00000042492.12	Tbc1d10b	4447.24	0.667812	0.132652	5.03432	4.79538e-07	6.0044e-06	3160.57	3943.43	3804.18	3750.26	4079.73	3968.69	5689.08	5642.92	5986.3
ENSMUSG00000068854.7	Hist2h2be	338.861	-1.06945	0.212638	-5.02947	4.91849e-07	6.15453e-06	415.125	447.029	507.316	319.052	295.643	411.192	218.492	184.597	251.297
ENSMUSG00000050605.17	Zfp61	251.334	-1.32365	0.263205	-5.02897	4.93126e-07	6.16649e-06	340.924	367.202	381.53	261.212	204.901	271.855	95.2668	183.751	155.366
ENSMUSG00000021720.11	Rnf180	813.98	-1.28975	0.256493	-5.02838	4.94636e-07	6.18134e-06	1032.8	789.142	1241.88	1108.29	732.523	1164.4	405.919	364.961	485.911
ENSMUSG00000026458.13	Ppfia4	372.914	-1.6362	0.325415	-5.02804	4.95522e-07	6.18837e-06	511.386	558.786	726.227	285.468	300.766	395.602	104.586	238.791	234.614
ENSMUSG00000046441.5	Cmtr2	348.51	-0.739433	0.14714	-5.02538	5.02445e-07	6.27075e-06	436.182	417.379	423.227	390.886	346.869	356.627	271.303	257.42	236.699
ENSMUSG00000042203.7	Tbc1d22b	866	0.727777	0.144842	5.02465	5.04363e-07	6.29059e-06	638.731	602.12	709.548	863.867	922.788	815.564	997.195	1179.56	1064.63
ENSMUSG00000087206.1	AC149282.2	148.067	2.87313	0.57186	5.02418	5.05597e-07	6.30188e-06	58.1576	15.9653	41.0023	215.5	40.2485	97.4389	339.647	206.614	318.032
ENSMUSG00000029826.14	Zc3hav1	10733	0.993651	0.197792	5.02371	5.06835e-07	6.31321e-06	6682.11	6418.05	5619.4	15684.9	12122.8	12798.6	15257.2	10445.8	11568
ENSMUSG00000110588.1	RP23-98C9.5	1463.24	2.03197	0.404785	5.01987	5.17068e-07	6.43648e-06	534.449	743.527	298.135	1806.1	2165.37	1199.47	1909.48	3191.5	1321.14
ENSMUSG00000050122.18	Vwa3b	10.8702	6.73534	1.34189	5.01928	5.18662e-07	6.45215e-06	0	0	0	5.59741	16.0994	7.79512	19.6747	33.0243	15.6409
ENSMUSG00000020773.11	Trim47	1326.16	-1.12227	0.223636	-5.01827	5.21375e-07	6.48169e-06	1717.66	1439.16	1421.88	2005.74	1421.14	1826.98	543.642	850.164	709.055
ENSMUSG00000037826.5	Ppm1k	1524.06	1.11415	0.222146	5.0154	5.2923e-07	6.57507e-06	492.335	738.966	710.938	2090.63	3006.93	2480.8	1308.88	1330.29	1556.79
ENSMUSG00000083567.3	RP23-206I14.2	51.3952	1.85584	0.370271	5.0121	5.38388e-07	6.68452e-06	17.0462	22.8076	22.2385	48.5109	79.7652	49.6939	59.024	82.1374	81.3328
ENSMUSG00000038172.14	Ttc39b	999.841	1.63555	0.326852	5.00394	5.61712e-07	6.96959e-06	591.604	314.745	564.997	1129.74	723.741	1081.57	1888.77	1011.05	1692.35
ENSMUSG00000084241.1	RP23-264D16.4	358.647	-1.60689	0.321257	-5.00187	5.67754e-07	7.04e-06	647.756	371.764	630.323	395.55	235.637	402.423	186.392	133.791	224.187
ENSMUSG00000019841.15	Rev3l	975.261	-0.84411	0.168782	-5.00119	5.69764e-07	7.06036e-06	1141.09	1329.68	1232.85	1041.12	1136.47	835.052	681.365	643.55	736.166
ENSMUSG00000042055.13	Wdr11	3334.84	-0.754891	0.150956	-5.00074	5.71106e-07	7.07242e-06	3828.38	3697.11	4620.75	3820.23	3220.61	3622.78	2293.65	2330.33	2579.71
ENSMUSG00000019838.11	Slc16a10	2760.97	-1.20839	0.241676	-5.00006	5.73133e-07	7.09294e-06	4540.31	4025.54	4266.32	1974.95	2715.68	1771.44	2415.84	1599.56	1539.07
ENSMUSG00000027303.18	Ptpra	11182.2	-0.801579	0.160341	-4.99921	5.75656e-07	7.11956e-06	13020.3	13577.4	15359.2	10264.7	11396.9	12948.7	7161.58	8976.68	7934.12
ENSMUSG00000024642.16	Tle4	2606.23	1.00188	0.200442	4.99837	5.7818e-07	7.14617e-06	1725.68	1801.8	1834.68	2699.82	2324.9	2329.77	4569.7	2870.57	3299.19
ENSMUSG00000109336.1	Samd4b	2623.58	1.19364	0.239096	4.9923	5.96643e-07	7.36961e-06	1768.79	1635.3	1903.48	2413.42	1726.29	2016.99	4970.44	2846.02	4331.49
ENSMUSG00000069830.10	Nlrp1a	553.249	0.698141	0.139849	4.99209	5.97289e-07	7.37284e-06	391.06	369.483	414.887	666.092	636.658	585.608	637.873	674.881	602.697
ENSMUSG00000052155.5	Acvr2a	1215.13	1.22236	0.244966	4.98993	6.04023e-07	7.45118e-06	601.631	620.366	626.848	1510.37	1538.22	1723.69	1954	1003.43	1357.63
ENSMUSG00000026014.15	Raph1	2453.44	-0.969404	0.194349	-4.98795	6.10234e-07	7.52295e-06	3653.9	2830.42	3862.55	2552.42	1875.58	2016.01	1872.2	1582.63	1835.2
ENSMUSG00000025375.15	Aatk	867.666	-1.286	0.257937	-4.98571	6.17357e-07	7.60587e-06	1400.8	1144.94	1685.96	668.89	475.664	695.714	435.949	712.986	588.099
ENSMUSG00000035356.17	Nfkbiz	2010.27	2.25338	0.451987	4.9855	6.18009e-07	7.60902e-06	893.422	670.543	1039.65	1313.53	740.572	1008.49	5289.38	1386.17	5750.64
ENSMUSG00000022749.8	Tbc1d23	1952.02	-0.597118	0.119862	-4.98172	6.30231e-07	7.75451e-06	2350.37	2317.25	2558.12	1903.12	1813.38	1843.54	1719.98	1478.47	1583.9
ENSMUSG00000029474.7	Rnf34	2177.8	0.933915	0.187562	4.97923	6.38382e-07	7.84977e-06	1503.07	1808.64	1398.25	1888.19	2145.61	1876.67	2821.76	3592.87	2565.11
ENSMUSG00000054277.8	Arfgap3	2778.3	1.11398	0.223751	4.97866	6.40265e-07	7.86788e-06	1700.61	1530.39	1741.55	3324.86	2414.18	3522.42	4198.99	2733.4	3838.28
ENSMUSG00000038740.9	Mvb12b	1646.91	-0.979525	0.196768	-4.97806	6.42252e-07	7.88724e-06	1843	2045.84	2438.59	1724	1575.55	1984.83	882.253	1091.5	1236.68
ENSMUSG00000098934.1	RP23-142E18.4	32.0047	4.97418	0.999335	4.97749	6.44154e-07	7.90552e-06	2.00544	4.56152	0.694954	61.5715	9.51328	22.411	66.2726	17.7823	103.23
ENSMUSG00000031762.7	Mt2	1740.8	2.0138	0.404668	4.97643	6.47674e-07	7.94364e-06	622.688	916.865	348.867	2146.61	2562.73	1468.4	2242.91	3755.46	1602.67
ENSMUSG00000038481.13	Cdk19	2201.26	-0.578584	0.116391	-4.97103	6.65996e-07	8.16313e-06	2596.04	2303.57	2628.32	2389.16	2551.75	2293.71	1668.2	1689.32	1691.3
ENSMUSG00000031216.13	Stard8	3190.39	-0.956276	0.192409	-4.97002	6.69464e-07	8.2004e-06	4980.5	4278.7	5777.85	1939.5	1909.24	2074.48	2066.88	2999.28	2687.11
ENSMUSG00000085882.1	RP23-192P17.5	158.111	-1.66415	0.334902	-4.96907	6.7276e-07	8.23551e-06	205.557	166.495	361.376	147.398	118.55	190.006	71.4501	78.7503	83.4182
ENSMUSG00000018796.13	Acsl1	2786.39	1.09104	0.219573	4.9689	6.73341e-07	8.23736e-06	2238.07	2059.52	2093.2	1789.31	1811.91	1468.4	6012.16	3864.69	3740.27
ENSMUSG00000084780.7	AC134581.3	246.489	1.42029	0.286048	4.96522	6.8623e-07	8.38969e-06	109.296	184.741	150.805	217.366	182.216	194.878	507.399	278.59	393.108
ENSMUSG00000114733.1	RP24-250M7.2	8.21706	6.6161	1.3328	4.96407	6.90294e-07	8.434e-06	0	0	0	3.73161	2.92716	3.89756	28.9942	13.5484	20.8546
ENSMUSG00000035199.6	Arl6ip5	9507.03	1.03591	0.208756	4.96229	6.96657e-07	8.50631e-06	6548.75	5790.84	6996.1	8184.35	7827.23	10558.5	14416.4	10238.4	15002.8
ENSMUSG00000022889.7	Mrpl39	1231.22	1.15576	0.232927	4.9619	6.98071e-07	8.51816e-06	874.37	960.199	697.039	880.659	1170.13	870.13	2355.78	1565.69	1706.95
ENSMUSG00000040033.16	Stat2	12368.8	1.69691	0.342082	4.96053	7.03026e-07	8.56772e-06	3446.34	9079.7	4160.69	12108.1	13861.6	14598.3	14967.2	21126.2	17971.4
ENSMUSG00000040339.10	Fam102b	5531.48	1.9104	0.38511	4.96065	7.02584e-07	8.56772e-06	3262.84	2538.48	2798.58	3307.14	2654.2	2888.09	17781.8	4844.41	9707.8
ENSMUSG00000000869.12	Il4	127.021	-2.1255	0.428584	-4.95936	7.07276e-07	8.61172e-06	225.612	114.038	211.961	208.97	83.4241	171.493	60.0595	32.1775	35.4528
ENSMUSG00000074385.3	RP23-284E19.11	37.2122	2.92987	0.590785	4.95928	7.07536e-07	8.61172e-06	7.01903	0	7.64449	83.9611	46.1028	57.489	61.095	46.5727	25.0255
ENSMUSG00000020105.9	Lrig3	37.0911	-1.69774	0.342649	-4.95476	7.24202e-07	8.80899e-06	67.1821	59.2997	61.1559	31.7187	30.0034	26.3085	14.4971	18.6291	25.0255
ENSMUSG00000025228.4	Actr1a	5434.35	0.535163	0.108033	4.95372	7.28072e-07	8.85044e-06	4439.03	4949.24	4443.53	4979.83	5052.28	5018.11	7032.14	6355.91	6639.05
ENSMUSG00000090706.1	RP23-181D9.3	397.085	-0.888215	0.179486	-4.94867	7.47237e-07	9.07765e-06	581.576	513.171	473.958	398.349	327.842	431.655	297.191	286.211	263.81
ENSMUSG00000043939.14	A530064D06Rik	63.4568	-2.14462	0.433474	-4.94752	7.51637e-07	9.12532e-06	116.315	109.476	88.2591	66.236	73.1791	47.7451	19.6747	39.7985	10.4273
ENSMUSG00000054517.9	Trim65	664.899	-1.30819	0.264616	-4.94374	7.66379e-07	9.29841e-06	915.481	793.704	1212.69	605.453	561.283	713.253	273.374	420.848	487.997
ENSMUSG00000004460.17	Dnajb11	5950.97	0.752737	0.152278	4.94316	7.68648e-07	9.31439e-06	4461.09	4454.32	4771.55	4813.77	6058.5	5932.08	7159.51	7294.98	8612.93
ENSMUSG00000035852.11	Misp	40.1637	2.53284	0.512392	4.94316	7.68668e-07	9.31439e-06	17.0462	4.56152	4.86468	73.6992	54.8843	47.7451	53.8465	65.2018	39.6237
ENSMUSG00000057522.15	Spop	5271	0.808757	0.163633	4.94249	7.71302e-07	9.34041e-06	4426	3827.11	4258.68	4419.15	4153.64	4425.68	8335.84	5979.94	7612.96
ENSMUSG00000027660.16	Skil	4118.05	1.46297	0.296006	4.94236	7.71819e-07	9.34076e-06	2386.47	2043.56	2806.22	3460.13	3292.33	3113.17	8565.73	3735.98	7658.84
ENSMUSG00000030609.18	Aen	612.858	0.974841	0.197314	4.94056	7.78967e-07	9.42132e-06	491.332	472.117	349.562	597.99	530.548	503.759	968.201	754.478	847.738
ENSMUSG00000021578.17	Ccdc127	2205.62	-0.860064	0.174087	-4.94043	7.79522e-07	9.42209e-06	2674.25	2689.01	3549.82	2017.87	1803.13	2201.15	1549.12	1589.4	1776.81
ENSMUSG00000020707.6	Rnf135	908.945	1.02804	0.208102	4.94006	7.80971e-07	9.43171e-06	680.845	428.783	658.816	995.406	881.808	905.208	1273.68	1291.33	1064.63
ENSMUSG00000021929.9	Kpna3	5641.57	1.45285	0.294101	4.93998	7.81302e-07	9.43171e-06	3917.62	3961.68	2953.55	3315.53	4016.8	2961.17	14436	6734.42	8477.38
ENSMUSG00000040483.15	Xaf1	2485.86	1.69266	0.342658	4.9398	7.82017e-07	9.4344e-06	771.09	1731.1	675.495	2739	3544.79	2674.7	3257.71	3934.13	3044.77
ENSMUSG00000040321.3	Zfp770	273.575	-0.863999	0.174917	-4.93948	7.83309e-07	9.44404e-06	347.943	353.517	373.885	266.81	298.571	229.956	181.214	200.686	209.588
ENSMUSG00000003283.14	Hck	5386.2	1.38822	0.281155	4.93754	7.91152e-07	9.52662e-06	4251.52	2882.88	2948.69	4799.78	3205.24	3987.2	11670.2	6314.42	8415.86
ENSMUSG00000073599.9	Ecscr	23.5759	3.90686	0.791247	4.9376	7.90918e-07	9.52662e-06	2.00544	4.56152	2.77982	12.1277	38.7849	23.3853	19.6747	70.2825	38.5809
ENSMUSG00000037007.17	Zfp113	196.538	-1.08489	0.220146	-4.92806	8.30486e-07	9.98771e-06	269.731	207.549	286.321	227.628	207.097	207.545	96.3023	136.331	130.341
ENSMUSG00000043015.15	Tmem194b	256.618	-1.39485	0.283036	-4.92816	8.30058e-07	9.98771e-06	320.87	312.464	492.027	228.561	201.974	323.497	123.226	138.025	168.922
ENSMUSG00000030602.13	Pak4	517.91	0.696245	0.141306	4.92721	8.341e-07	1.00249e-05	426.155	417.379	416.277	426.336	502.74	430.68	712.43	681.655	647.534
ENSMUSG00000029617.10	Ccz1	2502.53	0.737122	0.149608	4.92702	8.34946e-07	1.00288e-05	2090.67	2064.09	1669.97	2341.58	2461.01	2198.22	3504.16	2990.82	3202.22
ENSMUSG00000034636.9	Zyg11b	2306.69	-0.565193	0.114728	-4.92639	8.3762e-07	1.00546e-05	2728.4	2793.93	2689.47	2209.11	2491.02	2300.53	1737.58	1856.14	1954.07
ENSMUSG00000025876.15	Unc5a	109.274	1.49458	0.303507	4.92436	8.46371e-07	1.01533e-05	43.1169	95.7918	54.9013	99.8205	92.2056	75.028	182.25	182.904	157.452
ENSMUSG00000038147.13	Cd84	18142.9	-0.800339	0.162683	-4.91962	8.67109e-07	1.03956e-05	20283	22643.4	21186.4	17246.6	21346.3	23769.3	11908.3	13399.4	11503.4
ENSMUSG00000039202.12	Abhd2	2683.77	0.719392	0.146241	4.91921	8.68954e-07	1.04112e-05	1788.85	2150.75	2172.43	2761.39	2441.25	2779.93	3451.35	3058.56	3549.45
ENSMUSG00000033487.14	Fndc3a	9151.42	0.986048	0.200489	4.91823	8.73321e-07	1.04569e-05	5566.09	5229.78	5335.16	11837.6	13442.3	8998.49	12070.9	11117.3	8765.17
ENSMUSG00000023147.16	Wrb	428.304	-0.833805	0.169541	-4.91801	8.74278e-07	1.04619e-05	490.329	542.82	590.711	401.148	448.588	469.656	265.09	315.848	330.545
ENSMUSG00000067714.13	Lpar5	641.413	-1.7717	0.360381	-4.91618	8.82506e-07	1.05537e-05	1188.22	805.108	1394.08	503.767	320.524	568.069	182.25	412.38	398.322
ENSMUSG00000041845.10	Rhod	132.802	-1.24134	0.252517	-4.91586	8.83934e-07	1.05642e-05	204.554	239.48	204.316	85.8269	104.646	84.7719	85.9472	116.855	68.82
ENSMUSG00000040560.9	Wdr7	7161.84	0.603065	0.122687	4.91548	8.85641e-07	1.0578e-05	5344.49	5624.35	5873.75	7659.12	7165.69	7202.69	8941.62	7638.77	9006.04
ENSMUSG00000063873.10	Slc24a3	198.586	1.7624	0.35873	4.91287	8.97508e-07	1.07131e-05	81.2202	109.476	111.888	133.405	191.729	136.415	209.173	519.921	294.049
ENSMUSG00000047388.10	Atmin	1038.41	-0.928575	0.189063	-4.91147	9.03983e-07	1.07837e-05	1524.13	1496.18	1517.78	811.624	752.281	860.386	603.702	929.761	849.823
ENSMUSG00000006219.12	Fblim1	2837.85	-0.892771	0.181959	-4.90644	9.27452e-07	1.10568e-05	3893.55	3621.84	3661.02	2989.95	2836.42	2519.77	1727.23	2486.98	1803.92
ENSMUSG00000085287.8	RP23-10B20.2	48.2547	-1.5946	0.325413	-4.90021	9.57319e-07	1.14057e-05	88.2392	59.2997	101.463	38.249	32.1988	30.2061	28.9942	25.4033	30.2391
ENSMUSG00000034117.3	Ptgdr2	69.4877	1.7034	0.347665	4.89953	9.60655e-07	1.14384e-05	25.0679	41.0536	19.4587	102.619	98.7917	78.9255	91.1248	101.613	66.7346
ENSMUSG00000024085.13	Man2a1	10760.1	0.730512	0.149127	4.89858	9.65299e-07	1.14865e-05	7634.69	8197.04	9491.68	8899.88	10602.9	9988.47	15092.5	12928.6	14004.9
ENSMUSG00000027351.14	Spred1	9964.2	1.52319	0.311315	4.89276	9.9434e-07	1.18247e-05	5181.04	6288.05	3991.81	10721.8	10798.3	8271.59	21864.8	9823.46	12736.9
ENSMUSG00000022946.10	Dopey2	1503.44	-1.00387	0.205207	-4.89196	9.98374e-07	1.18654e-05	1825.95	1744.78	2567.85	1499.17	1210.38	1617.49	967.165	1049.16	1048.98
ENSMUSG00000072109.11	AC167036.4	343.909	2.58293	0.528384	4.88835	1.01683e-06	1.20773e-05	133.361	109.476	36.8326	519.626	441.27	190.98	794.235	586.816	282.579
ENSMUSG00000050777.7	Tmem37	971.895	-1.67962	0.343609	-4.88816	1.0178e-06	1.20813e-05	1690.58	805.108	1954.91	1108.29	642.512	1153.68	452.517	432.703	506.766
ENSMUSG00000029217.16	Tec	3487.42	-0.964513	0.197335	-4.88769	1.02026e-06	1.2103e-05	2982.08	2695.86	3469.9	6439.82	5580.64	5525.76	1842.17	1231.21	1619.36
ENSMUSG00000026307.12	Scly	1654.34	0.763129	0.156171	4.88648	1.02653e-06	1.21651e-05	1418.85	1309.16	1108.45	1593.4	1567.5	1387.53	2346.46	2170.29	1987.44
ENSMUSG00000062753.14	RP23-189L19.6	1448.25	0.869263	0.177893	4.88644	1.02676e-06	1.21651e-05	1067.89	973.884	1130.69	1412.41	1091.83	1552.2	1908.44	1796.86	2100.05
ENSMUSG00000087443.1	Ppp1r18os	114.853	1.16132	0.23769	4.88588	1.0297e-06	1.21923e-05	76.2066	95.7918	79.9197	65.3031	70.9837	89.6438	185.356	160.888	209.588
ENSMUSG00000043895.6	S1pr2	9693.45	0.714202	0.146249	4.88348	1.04232e-06	1.23341e-05	6629.97	5711.02	6900.89	12676.3	10723.7	13014.9	9836.3	11148.7	10599.3
ENSMUSG00000024218.12	Taf11	1055.74	0.523727	0.107303	4.88083	1.05641e-06	1.24931e-05	886.403	896.338	863.828	992.607	1036.22	1025.06	1314.06	1233.75	1253.36
ENSMUSG00000035877.17	Zhx3	541.024	-0.726082	0.148835	-4.87843	1.06934e-06	1.26383e-05	576.563	677.385	704.683	590.527	570.065	567.095	363.464	410.687	408.749
ENSMUSG00000028789.16	Azin2	105.19	1.2863	0.2638	4.87607	1.08222e-06	1.27827e-05	67.1821	50.1767	64.6307	125.942	100.255	86.7207	149.113	174.436	128.256
ENSMUSG00000038390.11	Gpr162	2456.13	-2.75628	0.565344	-4.87541	1.08584e-06	1.28174e-05	6921.76	1678.64	5013.4	3313.67	728.864	2433.05	850.153	397.138	768.491
ENSMUSG00000028086.15	Fbxw7	1148.83	-0.624362	0.128327	-4.8654	1.14228e-06	1.34754e-05	1543.18	1473.37	1373.23	1061.64	1085.25	956.85	998.23	955.164	892.575
ENSMUSG00000028098.13	Rnf115	5355.73	1.1578	0.238004	4.86465	1.14659e-06	1.3518e-05	3793.28	3427.98	2696.42	5826.9	5110.83	5222.73	9780.38	5712.36	6630.71
ENSMUSG00000027349.5	Fam98b	916.053	0.699271	0.143754	4.86436	1.14825e-06	1.35292e-05	688.867	702.473	668.546	1009.4	979.868	853.565	1230.18	1027.14	1084.44
ENSMUSG00000024118.14	RP23-35F19.3	157.577	-1.15384	0.237384	-4.86066	1.16998e-06	1.37767e-05	169.459	180.18	202.927	176.318	236.368	204.622	65.237	96.5326	86.5464
ENSMUSG00000031644.19	Nek1	366.252	-1.01143	0.208163	-4.85881	1.18095e-06	1.38973e-05	460.248	390.01	531.64	394.617	390.044	439.45	213.315	196.452	280.494
ENSMUSG00000032468.11	Armc8	1500.34	0.749939	0.154366	4.85817	1.18473e-06	1.39333e-05	1283.48	1181.43	1086.21	1389.09	1415.28	1177.06	2211.85	1840.05	1918.62
ENSMUSG00000066152.11	Slc31a2	5534.3	1.71658	0.353539	4.85542	1.2013e-06	1.41195e-05	2905.88	1477.93	2462.92	8522.06	4479.29	7440.44	9847.69	4892.68	7779.79
ENSMUSG00000071662.3	Polr2g	1325.62	0.791197	0.162961	4.85514	1.20299e-06	1.41307e-05	1108	1131.26	946.527	943.164	1216.24	1083.52	1681.67	1984	1836.24
ENSMUSG00000092187.1	RP23-84M17.2	181.9	-1.19551	0.246264	-4.85457	1.20648e-06	1.4163e-05	325.883	237.199	247.404	197.775	140.504	133.491	103.551	126.17	125.127
ENSMUSG00000021772.15	Nkiras1	892.667	0.828672	0.17071	4.85428	1.20825e-06	1.41751e-05	631.712	668.262	653.952	755.65	1047.92	808.743	1227.08	1154.16	1086.52
ENSMUSG00000035629.18	Rubcn	2106.22	-0.956206	0.197112	-4.85108	1.22791e-06	1.43969e-05	3131.49	2310.41	3068.92	2207.25	1687.51	2159.25	1271.6	1510.65	1608.93
ENSMUSG00000030203.17	Dusp16	1666.99	1.69289	0.349093	4.84939	1.2384e-06	1.45111e-05	533.446	843.88	548.319	2762.32	2132.44	1972.16	3135.52	1208.35	1866.48
ENSMUSG00000074165.10	Zfp788	226.674	-1.07863	0.222526	-4.84722	1.25203e-06	1.46618e-05	302.821	310.183	334.968	182.849	250.272	210.468	117.012	176.13	155.366
ENSMUSG00000033400.14	Agl	1874.53	-0.900176	0.185727	-4.84677	1.25488e-06	1.46862e-05	2354.38	2319.53	2601.91	1967.49	1978.76	1750	1029.3	1569.08	1300.28
ENSMUSG00000042814.8	Mcts2	69.9226	1.58804	0.327781	4.84481	1.26733e-06	1.48229e-05	30.0815	29.6499	29.883	97.9547	77.5698	93.5414	111.835	61.8147	96.9737
ENSMUSG00000021583.7	Erap1	7623.06	1.04849	0.216435	4.84435	1.27025e-06	1.48479e-05	4371.85	6392.96	4797.27	5885.68	8377.54	6613.18	12119.6	9580.43	10469
ENSMUSG00000036206.12	Sh3bp4	562.935	1.81437	0.37463	4.84309	1.27836e-06	1.49337e-05	446.209	264.568	264.082	307.858	144.895	203.647	1649.57	786.656	998.933
ENSMUSG00000049969.3	Plekhf2	2730.07	0.861849	0.177975	4.84254	1.28191e-06	1.49661e-05	2341.35	2050.4	1879.85	2532.83	2365.15	2003.34	4420.59	3549.69	3427.45
ENSMUSG00000033904.16	Ccp110	309.718	-1.01828	0.210414	-4.8394	1.30231e-06	1.51949e-05	372.008	433.344	414.192	305.059	390.044	272.829	193.64	231.17	175.178
ENSMUSG00000024486.5	Hbegf	112.663	3.15944	0.653006	4.83831	1.30949e-06	1.52694e-05	26.0707	11.4038	13.8991	265.877	105.378	123.747	297.191	43.1856	127.213
ENSMUSG00000091408.3	RP23-100O18.2	57.9872	1.57445	0.325434	4.83799	1.31157e-06	1.52843e-05	24.0652	43.3344	27.7982	44.7793	59.275	52.617	104.586	73.6696	91.7601
ENSMUSG00000033458.17	Fan1	235.175	-0.982899	0.203222	-4.83658	1.32091e-06	1.53838e-05	322.875	282.814	348.867	239.756	224.66	212.417	127.368	179.517	178.306
ENSMUSG00000051246.3	Msantd1	85.6269	2.34382	0.484626	4.83634	1.32253e-06	1.53934e-05	20.0544	20.5268	40.3073	103.552	51.2254	112.055	158.433	73.6696	190.819
ENSMUSG00000015396.4	Cd83	19139.4	3.04687	0.630188	4.83486	1.33239e-06	1.54988e-05	7502.34	1404.95	4596.42	19201.9	8705.38	19220.8	59180.4	9842.94	42599.6
ENSMUSG00000030446.17	Zfp273	110.748	-1.35564	0.280439	-4.834	1.3382e-06	1.55568e-05	185.503	148.249	143.855	102.619	112.696	117.901	43.4914	82.9841	59.4355
ENSMUSG00000049119.14	Fam110b	264.587	-1.4583	0.301868	-4.83093	1.35894e-06	1.57885e-05	438.188	280.533	323.154	317.187	300.766	342.011	77.6632	169.355	132.426
ENSMUSG00000025981.13	Coq10b	412.421	1.19055	0.246477	4.83026	1.36353e-06	1.58321e-05	323.878	269.129	212.656	340.509	403.948	325.446	752.815	477.582	605.825
ENSMUSG00000038178.16	Slc43a2	22580.5	-1.81056	0.374934	-4.82902	1.37208e-06	1.59218e-05	45992.7	20123.1	48306.9	24342.2	10578	21260.2	11613.2	9852.25	11156.1
ENSMUSG00000101279.1	RP23-76P9.2	52.7718	1.77274	0.367236	4.82725	1.38434e-06	1.60543e-05	30.0815	27.3691	20.1537	45.7122	58.5433	32.1549	107.693	81.2906	71.9482
ENSMUSG00000002233.13	Rhoc	729.072	0.689732	0.142897	4.82679	1.38751e-06	1.60813e-05	605.642	522.294	517.046	762.181	744.963	752.229	968.201	874.721	814.371
ENSMUSG00000025492.6	Ifitm3	27395.3	1.1578	0.239981	4.82457	1.40309e-06	1.62521e-05	12422.7	22675.3	14031.1	26403.9	32079.5	29358.4	36174.5	38968.7	34443.4
ENSMUSG00000044092.8	RP23-276B20.1	316.375	-1.85701	0.384995	-4.82346	1.41091e-06	1.63328e-05	430.166	490.363	643.527	231.36	270.763	349.806	64.2015	206.614	160.58
ENSMUSG00000060538.14	Tmem219	1820.2	0.687082	0.142478	4.82236	1.4187e-06	1.64131e-05	1366.7	1548.63	1233.54	1753.86	1911.44	1908.83	2118.65	2405.69	2134.46
ENSMUSG00000053390.15	Zfp952	723.297	0.855501	0.177431	4.82159	1.42418e-06	1.64665e-05	487.321	392.29	533.03	804.161	780.821	936.388	906.07	769.72	899.874
ENSMUSG00000024429.9	Gnl1	1611.63	0.900534	0.186897	4.81835	1.44754e-06	1.67265e-05	1270.44	1179.15	1265.51	1408.68	1029.63	1409.94	2522.5	1956.9	2461.88
ENSMUSG00000086564.9	Cd101	52.572	-1.84103	0.382155	-4.81749	1.45374e-06	1.67881e-05	110.299	59.2997	109.803	46.6451	27.0763	40.9244	27.9587	31.3307	19.8118
ENSMUSG00000087314.1	Prkag2os2	33.7409	-1.93618	0.401923	-4.81728	1.45527e-06	1.67956e-05	58.1576	36.4921	77.8348	27.0541	26.3445	31.1805	16.5681	14.3952	15.6409
ENSMUSG00000061232.15	H2-K1	56214.8	1.12092	0.232826	4.81439	1.4765e-06	1.70303e-05	44490.6	33844.2	36329.4	52123.1	40978.1	48781.8	107166	62529.4	79690.5
ENSMUSG00000036097.7	Slf2	1985.89	-0.795152	0.165177	-4.81393	1.47992e-06	1.70596e-05	2797.58	2210.05	2685.3	2185.79	1727.76	1826.98	1565.69	1369.24	1504.66
ENSMUSG00000007564.15	Ppp2r1a	8830	0.497019	0.10327	4.81282	1.48816e-06	1.71339e-05	6965.88	7759.14	7588.2	8370.93	8990.78	8313.49	10622.2	10541.5	10317.8
ENSMUSG00000106990.1	RP23-23C4.6	417.067	1.59549	0.331508	4.81283	1.48804e-06	1.71339e-05	124.337	180.18	266.167	390.886	494.691	565.146	463.908	485.203	783.089
ENSMUSG00000027425.18	Csrp2bp	2553.69	0.515129	0.107079	4.81073	1.50378e-06	1.73034e-05	1876.09	1929.52	1886.1	3264.22	2965.22	2930.96	2710.96	2622.47	2797.64
ENSMUSG00000033075.17	Senp1	1812.27	1.06575	0.221572	4.80994	1.50975e-06	1.73616e-05	1185.21	1231.61	1152.93	2104.63	1599.69	1565.84	3094.1	1887.47	2488.99
ENSMUSG00000022687.12	Boc	53.2749	2.28208	0.474503	4.80941	1.51375e-06	1.73973e-05	9.02446	6.84227	6.25458	104.485	122.941	121.799	34.1718	22.863	51.0937
ENSMUSG00000068115.13	Ninl	112.049	-1.27335	0.265049	-4.80419	1.55378e-06	1.78466e-05	158.429	150.53	186.248	92.3573	106.11	109.132	46.5979	78.7503	80.2901
ENSMUSG00000038179.13	Slamf7	14340.6	1.53058	0.31896	4.79864	1.59743e-06	1.83362e-05	9726.36	6655.25	9509.05	11368.3	6173.39	10820.6	32669.3	16636.6	25506.2
ENSMUSG00000106734.3	RP24-328P2.5	2778.89	1.7607	0.366924	4.79853	1.59832e-06	1.83362e-05	712.932	2018.47	931.933	2566.41	3770.92	2626.95	4938.34	3591.18	3852.88
ENSMUSG00000034765.6	Dusp5	141.629	2.58986	0.539878	4.79713	1.60958e-06	1.84543e-05	72.1957	20.5268	29.1881	176.318	97.3282	131.543	376.925	101.613	269.024
ENSMUSG00000020812.17	RP23-313J14.6	173.444	0.94573	0.197181	4.79625	1.61664e-06	1.85242e-05	93.2528	120.88	113.277	205.238	189.534	213.391	222.634	187.984	214.802
ENSMUSG00000046658.16	Zfp316	305.376	-1.22775	0.256071	-4.79457	1.63025e-06	1.8669e-05	526.427	337.552	435.041	354.503	217.342	320.574	191.569	196.452	168.922
ENSMUSG00000050240.16	Hic2	144.567	-1.09627	0.22873	-4.79286	1.64417e-06	1.88172e-05	202.549	207.549	217.521	158.593	110.5	111.08	98.3733	108.387	86.5464
ENSMUSG00000007659.18	Bcl2l1	3673.9	1.04401	0.217883	4.79162	1.65442e-06	1.89231e-05	2217.01	2946.74	1843.71	4159.81	3792.14	3680.27	5717.04	4580.22	4128.16
ENSMUSG00000054099.11	Slc25a40	175.913	-1.02724	0.214421	-4.79078	1.66136e-06	1.89799e-05	240.652	205.268	264.082	162.325	182.948	176.364	97.3378	113.468	140.768
ENSMUSG00000100235.8	RP23-370B22.3	165.488	-1.30244	0.271862	-4.79082	1.66099e-06	1.89799e-05	196.533	191.584	257.133	172.587	172.703	235.802	64.2015	91.4519	107.401
ENSMUSG00000028837.8	Psmb2	2866.25	0.734023	0.153226	4.79045	1.6641e-06	1.89999e-05	2160.86	2570.41	1980.62	2596.27	2875.94	2470.08	3987.74	3644.53	3509.82
ENSMUSG00000023094.14	Msrb2	585.533	1.06156	0.221675	4.78881	1.67773e-06	1.9144e-05	222.603	291.937	322.459	779.906	890.589	1016.29	479.441	663.873	602.697
ENSMUSG00000098176.2	Ccdc166	60.9475	-1.93098	0.403333	-4.78757	1.68815e-06	1.92515e-05	136.37	88.9496	78.5298	77.4308	35.8577	51.6426	19.6747	28.7904	31.2818
ENSMUSG00000030671.9	Pde3b	478.031	-2.14599	0.448348	-4.78642	1.69779e-06	1.935e-05	959.601	294.218	1028.53	559.741	276.617	666.482	170.859	171.049	175.178
ENSMUSG00000019960.8	Dusp6	446.664	-1.68571	0.352256	-4.78546	1.70593e-06	1.94312e-05	806.185	1090.2	732.481	170.721	242.955	162.723	171.894	425.929	216.887
ENSMUSG00000085118.2	AC122248.2	36.327	-2.07569	0.433784	-4.78509	1.70909e-06	1.94557e-05	75.2038	34.2114	72.2752	39.1819	24.8809	37.0268	11.3906	16.0888	16.6836
ENSMUSG00000053897.15	Slc39a8	1433.45	0.744541	0.155619	4.78438	1.71514e-06	1.95128e-05	841.28	1017.22	958.341	1593.4	1855.82	1925.39	1417.61	1689.32	1602.67
ENSMUSG00000020092.9	Pald1	724.708	-1.87275	0.391674	-4.78139	1.74084e-06	1.97924e-05	763.068	823.354	1737.38	557.875	632.999	1099.11	211.244	348.025	349.314
ENSMUSG00000078956.3	RP23-152H17.2	15.5053	-2.92319	0.611381	-4.78129	1.74177e-06	1.97924e-05	36.0978	29.6499	29.1881	13.0606	13.1722	5.84634	6.21305	4.23388	2.08546
ENSMUSG00000020132.10	Rab21	4068.24	0.576214	0.120696	4.77408	1.80528e-06	2.04969e-05	3319	3336.75	3132.85	4063.72	4390.01	3782.58	5209.64	4617.47	4762.14
ENSMUSG00000041936.18	Agrn	995.75	0.683277	0.143124	4.77401	1.80591e-06	2.04969e-05	717.946	850.723	841.589	975.815	845.218	865.258	1366.87	1216.82	1281.51
ENSMUSG00000030019.6	Fbxl14	1563.94	0.670817	0.140541	4.77309	1.81419e-06	2.05709e-05	1101.99	1044.59	963.901	2126.08	1912.17	1979.96	1497.35	1829.04	1620.4
ENSMUSG00000097364.1	Gm26719	12.7376	3.64837	0.764368	4.77305	1.81457e-06	2.05709e-05	1.00272	0	3.47477	11.1948	12.4404	11.6927	23.8167	22.863	28.1537
ENSMUSG00000000131.15	Xpo6	4693.12	0.832867	0.17454	4.77179	1.82599e-06	2.06881e-05	3379.16	3288.85	3630.44	5241.04	3914.35	4433.47	6964.83	5256.79	6129.16
ENSMUSG00000041736.7	Tspo	5922.93	1.14516	0.240029	4.77094	1.83368e-06	2.07629e-05	3642.87	4805.56	2875.02	5216.79	6755.16	4989.85	8412.47	9593.14	7015.47
ENSMUSG00000004843.7	Chmp2b	4393.34	0.837667	0.175631	4.76947	1.8471e-06	2.09025e-05	3232.76	2568.13	2617.2	5694.43	5112.29	5262.68	5876.51	4294.01	4882.05
ENSMUSG00000045427.13	Hnrnph2	3565.64	0.996285	0.208908	4.76902	1.85122e-06	2.09368e-05	2668.23	2638.84	2014.67	3882.74	3137.19	3152.15	5881.69	4005.25	4710
ENSMUSG00000022972.10	RP24-100B13.1	167.999	1.22224	0.256304	4.7687	1.85417e-06	2.09578e-05	84.2283	120.88	76.4449	177.251	202.706	212.417	180.179	260.807	197.076
ENSMUSG00000010097.14	Nxf1	4833.72	1.28236	0.268962	4.76783	1.86225e-06	2.10291e-05	2897.85	2727.79	3720.09	4101.97	3197.19	4114.85	9586.74	4925.7	8231.29
ENSMUSG00000044224.16	Dnajc21	750.589	1.04936	0.220094	4.76778	1.86267e-06	2.10291e-05	528.432	613.524	393.344	738.858	654.953	666.482	1255.04	884.882	1019.79
ENSMUSG00000022526.8	Zfp251	444.986	-0.923338	0.193683	-4.76725	1.86756e-06	2.10719e-05	656.78	504.048	649.782	418.873	406.876	410.218	257.842	361.574	338.887
ENSMUSG00000000078.7	Klf6	21416.5	1.49314	0.313258	4.7665	1.87455e-06	2.11384e-05	14876.3	11143.8	10397.9	22395.2	15436.4	15978	48880.2	21365	32275.6
ENSMUSG00000021690.10	Jmy	866.792	-1.90703	0.400163	-4.76564	1.88259e-06	2.12165e-05	1585.3	764.054	1537.93	1247.29	576.651	1051.37	380.032	204.92	453.587
ENSMUSG00000038608.15	Dock10	9900.08	0.723705	0.151875	4.76512	1.8874e-06	2.12582e-05	6627.97	8105.81	7343.58	9696.58	11301	9580.2	12958.4	12658.5	10828.7
ENSMUSG00000034730.17	Adgrb1	9.33638	6.76874	1.42186	4.76049	1.93125e-06	2.17394e-05	0	0	0	6.53031	6.58612	0.974389	14.4971	39.7985	15.6409
ENSMUSG00000032366.15	Tpm1	1260.98	-1.1855	0.249131	-4.75857	1.9497e-06	2.19342e-05	1934.24	1854.26	1501.1	1104.56	1523.59	1107.88	635.802	1026.29	661.09
ENSMUSG00000085880.4	RP23-408K4.4	16.2834	4.0075	0.842654	4.75581	1.97651e-06	2.22227e-05	1.00272	2.28076	1.38991	22.3896	27.0763	24.3597	24.8522	16.0888	27.1109
ENSMUSG00000086795.1	RP23-157N11.4	17.3975	-2.6471	0.556635	-4.75554	1.97918e-06	2.22396e-05	41.1114	18.2461	39.6124	13.9935	14.6358	12.6671	6.21305	5.92744	4.17091
ENSMUSG00000025008.15	Tctn3	551.989	-1.29509	0.272393	-4.75448	1.98954e-06	2.2343e-05	620.682	622.647	1088.3	535.486	572.26	575.864	244.38	354.8	353.485
ENSMUSG00000015247.10	Nipsnap3b	1831.92	0.743956	0.156485	4.75416	1.99278e-06	2.23532e-05	1370.72	1379.86	1199.49	1807.03	2264.16	1859.14	2346.46	2258.35	2002.04
ENSMUSG00000107961.1	RP23-20K24.11	653.987	1.15547	0.243042	4.75421	1.99219e-06	2.23532e-05	331.9	367.202	529.555	510.297	752.281	646.02	1031.37	834.075	883.191
ENSMUSG00000028550.15	Atg4c	673.387	-0.735232	0.154714	-4.7522	2.01216e-06	2.25574e-05	953.585	716.158	894.406	658.629	654.221	635.302	506.364	499.598	542.219
ENSMUSG00000003200.9	Sh3gl1	3159.57	-0.715164	0.150549	-4.75038	2.03032e-06	2.27446e-05	4395.92	3459.91	4326.09	2998.35	2720.8	3107.33	2290.55	2583.52	2553.64
ENSMUSG00000067942.6	Zfp160	1130.59	0.870151	0.183178	4.75029	2.03123e-06	2.27446e-05	844.289	661.42	883.286	1106.42	1054.51	1239.42	1623.68	1243.07	1519.25
ENSMUSG00000060397.6	Zfp128	159.803	-1.09422	0.230449	-4.74819	2.05246e-06	2.29688e-05	209.568	193.864	234.894	157.66	149.285	192.929	78.6987	116.008	105.316
ENSMUSG00000048445.6	Ccdc57	93.1112	-1.14517	0.241256	-4.74669	2.06776e-06	2.31266e-05	109.296	143.688	126.482	107.284	87.0831	94.5158	49.7044	58.4276	61.521
ENSMUSG00000039976.4	Tbc1d16	1123.59	-1.56937	0.330672	-4.74601	2.07471e-06	2.31908e-05	1719.66	1133.54	2099.46	1312.59	750.085	1425.53	520.861	425.929	724.696
ENSMUSG00000008200.14	Fnbp4	3699.06	0.79636	0.167813	4.74551	2.07981e-06	2.32207e-05	2275.17	2704.98	3059.19	3877.14	3853.61	3555.55	5180.65	4085.7	4699.58
ENSMUSG00000092534.8	Pagr1b	1573.61	0.635479	0.133911	4.74554	2.07953e-06	2.32207e-05	1306.54	1452.84	1160.57	1433.87	1342.1	1398.25	2045.13	2098.31	1924.88
ENSMUSG00000027130.15	Slc12a6	6807.08	-1.0656	0.224618	-4.74403	2.09504e-06	2.33772e-05	8090.93	8660.04	12303.5	5908.07	5365.49	7050.68	4413.34	4012.03	5459.72
ENSMUSG00000043572.7	Pars2	162.103	-0.99882	0.210687	-4.74077	2.12911e-06	2.37434e-05	216.587	207.549	216.131	143.667	169.775	185.134	89.0537	123.629	107.401
ENSMUSG00000005718.8	Tfap4	153.089	-1.69021	0.356651	-4.73911	2.14662e-06	2.39248e-05	263.715	109.476	225.86	191.245	149.285	250.418	53.8465	60.9679	72.991
ENSMUSG00000004296.14	Il12b	26.9804	6.10871	1.28909	4.73876	2.15029e-06	2.39518e-05	3.00815	0	0	6.53031	1.46358	7.79512	125.297	5.92744	92.8028
ENSMUSG00000041143.16	Tmco4	648.207	1.01413	0.21417	4.73515	2.18891e-06	2.43678e-05	406.101	574.751	389.869	532.687	683.493	500.836	883.289	989.035	873.806
ENSMUSG00000078768.2	Zfp566	47.9372	-1.50824	0.318558	-4.7346	2.19486e-06	2.44199e-05	80.2174	52.4574	83.3945	48.5109	42.4439	46.7707	22.7812	28.7904	26.0682
ENSMUSG00000039163.10	Cmc1	730.144	0.745304	0.157448	4.73366	2.2051e-06	2.45195e-05	528.432	513.171	565.692	653.031	821.069	790.23	901.928	972.947	824.798
ENSMUSG00000032690.16	Oas2	4627.47	1.60011	0.33813	4.73222	2.22074e-06	2.46792e-05	1110.01	3304.82	1757.54	5504.12	5978	5310.42	5913.79	6681.07	6087.45
ENSMUSG00000084616.1	Gm25047	26.453	-2.1673	0.458021	-4.73187	2.22458e-06	2.47075e-05	56.1522	57.019	43.7821	15.8593	21.9537	8.7695	8.28407	12.7017	13.5555
ENSMUSG00000026923.15	Notch1	5158.68	1.47625	0.312132	4.72958	2.24983e-06	2.49735e-05	2737.42	2057.24	4159.99	4779.25	3107.18	4651.74	9916.03	6057	8962.25
ENSMUSG00000038844.10	Kif16b	2167.74	-0.618796	0.130844	-4.72926	2.25343e-06	2.4999e-05	2516.82	2387.95	2540.75	2600.93	2235.62	2374.59	1732.41	1465.77	1654.81
ENSMUSG00000045730.3	Adrb2	323.11	-1.78106	0.376637	-4.72885	2.25793e-06	2.50344e-05	342.93	725.281	637.968	163.258	256.859	286.47	98.3733	195.605	201.247
ENSMUSG00000028923.14	Necap2	9234.57	0.711616	0.150523	4.72763	2.27151e-06	2.51704e-05	7782.09	7166.14	6877.26	9114.45	7447.43	8979.97	12862.1	10552.5	12329.2
ENSMUSG00000054931.7	Zkscan4	35.137	-2.05131	0.434075	-4.72571	2.29309e-06	2.53949e-05	69.1875	41.0536	58.3761	35.4503	24.1491	46.7707	9.31958	15.242	16.6836
ENSMUSG00000010342.16	Tex14	14.4002	3.17088	0.671141	4.72461	2.3056e-06	2.55187e-05	6.01631	2.28076	2.77982	3.73161	5.85433	4.87195	46.5979	22.0162	35.4528
ENSMUSG00000024095.15	Hnrnpll	2694.3	-0.66011	0.139748	-4.72358	2.31729e-06	2.56333e-05	3385.18	3172.53	3437.24	2460.06	3001.81	2464.23	2169.39	2204.16	1954.07
ENSMUSG00000042742.7	RP23-343E20.2	5449.87	1.24113	0.262779	4.72311	2.3226e-06	2.56771e-05	3060.3	3934.31	3106.44	4350.12	6226.81	4503.63	9683.04	5407.52	8776.64
ENSMUSG00000103439.1	RP23-354D10.2	233.154	2.33552	0.494657	4.72149	2.34129e-06	2.58689e-05	99.2691	43.3344	110.498	221.098	112.696	214.366	607.844	171.049	518.236
ENSMUSG00000033880.11	Lgals3bp	33982.7	0.905346	0.191767	4.72108	2.346e-06	2.5906e-05	19591.1	30372.9	21663.1	34712.3	33221.8	32152.9	43702.6	48305.2	42122
ENSMUSG00000112226.1	RP23-325K4.8	35.7069	2.54443	0.539018	4.72049	2.35273e-06	2.59654e-05	9.02446	15.9653	2.08486	57.8399	62.2022	41.8987	45.5624	44.0324	42.7518
ENSMUSG00000034800.15	Zfp661	126.653	-1.30132	0.275772	-4.71884	2.37195e-06	2.61624e-05	150.408	150.53	216.131	152.063	117.087	142.261	52.8109	76.2099	82.3755
ENSMUSG00000019790.17	Stxbp5	11516.3	0.645111	0.136733	4.71805	2.38119e-06	2.62493e-05	7613.64	8071.6	8666.77	15335	12444.1	13429	13581.7	12175	12330.3
ENSMUSG00000025324.8	Atp10a	515.863	1.96498	0.416506	4.71777	2.38443e-06	2.62654e-05	122.332	401.413	168.874	318.119	609.582	349.806	872.934	950.931	848.781
ENSMUSG00000084110.4	RP24-76O19.3	48.6775	1.42783	0.302655	4.71769	2.3854e-06	2.62654e-05	25.0679	27.3691	25.0183	50.3767	49.03	54.5658	68.3436	60.1212	78.2046
ENSMUSG00000021932.13	Rnaseh2b	1155.58	1.21985	0.258624	4.7167	2.39707e-06	2.63787e-05	586.59	935.111	574.727	952.493	1491.39	999.724	1682.7	1562.3	1615.19
ENSMUSG00000097119.1	B230354K17Rik	412.155	-0.986351	0.209237	-4.71404	2.42849e-06	2.67092e-05	476.291	533.697	590.016	366.63	432.488	501.811	229.883	257.42	321.16
ENSMUSG00000050244.9	Heatr1	4836.27	0.647382	0.137336	4.71387	2.43057e-06	2.67168e-05	2942.98	3058.5	3042.51	7409.1	6202.66	6706.72	5185.83	4739.41	4238.69
ENSMUSG00000026090.16	AC140321.1	16.59	5.85538	1.24246	4.71272	2.44428e-06	2.68521e-05	0	4.56152	0	0	0.731791	0.974389	65.237	15.242	62.5637
ENSMUSG00000015659.12	Serac1	354.209	-0.783944	0.166586	-4.70595	2.52687e-06	2.77435e-05	474.286	428.783	547.624	309.723	267.104	312.779	281.658	289.598	276.323
ENSMUSG00000038195.6	Rilp	109.204	-1.24715	0.265129	-4.70394	2.55186e-06	2.80018e-05	161.438	132.284	211.266	73.6992	86.3513	102.311	64.2015	76.2099	75.0764
ENSMUSG00000030486.9	RP24-84I4.2	49.405	-1.86052	0.395682	-4.70205	2.57564e-06	2.82417e-05	77.2093	54.7382	88.2591	47.578	51.9571	63.3353	10.3551	22.0162	29.1964
ENSMUSG00000036138.16	Acaa1a	4615.17	0.885359	0.188295	4.70197	2.57666e-06	2.82417e-05	3483.44	2691.29	3626.27	4931.32	3864.59	4815.43	6385.98	5244.09	6494.11
ENSMUSG00000005580.11	Adcy9	703.113	-1.61876	0.344353	-4.70088	2.59048e-06	2.83768e-05	1265.43	839.319	1378.09	677.287	398.094	633.353	337.576	247.259	551.603
ENSMUSG00000056888.11	Glipr1	9779.25	-0.755661	0.160844	-4.69811	2.62581e-06	2.87474e-05	13740.2	11732.2	11266.6	9424.17	10058.5	10031.3	8182.59	7460.95	6116.64
ENSMUSG00000022969.13	Il10rb	10011.6	-0.792339	0.168772	-4.69473	2.66955e-06	2.92097e-05	13518.6	10952.2	14503.7	9214.27	8804.91	10598.4	8115.28	6688.69	7707.85
ENSMUSG00000071661.6	Zbtb3	102.188	1.09095	0.232385	4.69459	2.67142e-06	2.92134e-05	71.193	68.4227	70.1903	83.9611	74.6427	103.285	135.652	150.726	161.623
ENSMUSG00000032501.9	Trib1	1184.69	2.80673	0.598062	4.69304	2.69169e-06	2.94183e-05	419.136	116.319	229.335	2103.69	919.861	1504.46	2837.29	444.558	2087.54
ENSMUSG00000021843.17	Ktn1	2335.2	0.938251	0.200008	4.69106	2.71797e-06	2.96886e-05	1310.55	1669.51	1767.27	2014.13	2904.48	2256.69	3010.22	3282.11	2801.81
ENSMUSG00000021147.17	Wdr37	2392.79	0.940224	0.200574	4.68766	2.7635e-06	3.01687e-05	1421.85	1929.52	1423.27	2363.97	2889.84	2363.87	3535.23	2623.32	2984.29
ENSMUSG00000025246.13	Tbl1x	4539.06	0.756243	0.161332	4.68749	2.76579e-06	3.01765e-05	3710.06	3279.73	3174.55	4891.2	4568.57	4056.38	6630.36	5295.74	5244.92
ENSMUSG00000042348.10	Arl15	492.197	-0.873202	0.186329	-4.68634	2.7814e-06	3.03296e-05	547.484	677.385	483.688	616.648	641.049	536.889	336.54	302.299	287.793
ENSMUSG00000020238.14	Ncln	3914.02	0.717857	0.153226	4.68495	2.80025e-06	3.05178e-05	2897.85	2907.97	3171.77	3585.14	4007.29	3886.84	4216.59	5671.71	4881.01
ENSMUSG00000103174.1	RP24-443M8.2	30.2106	-2.567	0.548031	-4.68405	2.81266e-06	3.06357e-05	93.2528	41.0536	66.7156	17.7251	4.39074	14.6158	9.31958	14.3952	10.4273
ENSMUSG00000051969.7	Tlr11	35.9197	3.12873	0.668038	4.68347	2.82062e-06	3.07049e-05	12.0326	4.56152	6.25458	53.1754	15.3676	24.3597	88.0182	28.7904	90.7173
ENSMUSG00000006235.6	Epor	24.3937	-3.37466	0.72077	-4.68203	2.8405e-06	3.09038e-05	70.1903	20.5268	57.6812	32.6516	7.31791	16.5646	7.24856	4.23388	3.12818
ENSMUSG00000061207.11	Stk19	925.473	0.892403	0.19072	4.67912	2.88102e-06	3.13268e-05	697.892	556.505	652.562	1105.49	783.748	981.21	1259.18	1046.62	1246.06
ENSMUSG00000031503.13	Col4a2	115.71	2.39072	0.510958	4.6789	2.88415e-06	3.13431e-05	55.1495	20.5268	43.0871	149.264	81.2288	54.5658	248.522	287.904	101.145
ENSMUSG00000035900.18	Gramd4	429.959	-0.960521	0.205322	-4.67813	2.89506e-06	3.14438e-05	509.381	567.909	679.665	398.349	328.574	481.348	289.942	300.606	313.861
ENSMUSG00000049999.4	Ppp1r3d	433.998	1.01593	0.217309	4.67506	2.93864e-06	3.18991e-05	168.457	127.722	174.433	908.646	761.062	798.999	357.25	254.88	354.528
ENSMUSG00000071723.7	Gspt2	144.183	-1.25026	0.267469	-4.67441	2.94807e-06	3.19657e-05	211.573	180.18	235.589	114.747	136.845	153.954	61.095	106.694	96.9737
ENSMUSG00000116961.1	RP23-351D19.8	12.8246	3.66767	0.784628	4.6744	2.94811e-06	3.19657e-05	4.01087	2.28076	0.694954	9.32902	7.31791	8.7695	37.2783	18.6291	27.1109
ENSMUSG00000099227.1	Mir8114	278.174	-1.92846	0.412737	-4.67238	2.97722e-06	3.22631e-05	714.938	367.202	321.764	373.161	130.259	227.033	128.403	121.936	118.871
ENSMUSG00000063275.15	Hacd1	100.083	1.40564	0.300899	4.67148	2.9904e-06	3.23876e-05	44.1196	54.7382	57.6812	75.565	139.772	114.978	129.439	154.113	130.341
ENSMUSG00000097083.1	RP24-505E24.3	32.3144	-2.0327	0.435305	-4.6696	3.01786e-06	3.26665e-05	76.2066	38.7729	56.9862	22.3896	27.808	26.3085	8.28407	19.4759	14.5982
ENSMUSG00000116995.1	RP23-174D11.6	130.798	-1.31043	0.280637	-4.66946	3.01993e-06	3.26704e-05	225.612	155.092	200.147	130.606	84.1559	145.184	77.6632	71.1293	87.5892
ENSMUSG00000038866.15	Zcchc2	2747.94	1.09055	0.233604	4.66838	3.03583e-06	3.2824e-05	1413.83	1877.06	1089.69	3929.38	3986.8	3129.74	3502.09	3104.28	2698.58
ENSMUSG00000072640.11	Lyrm9	175.233	-1.39295	0.298531	-4.66602	3.07094e-06	3.31849e-05	239.65	200.707	325.933	162.325	147.09	207.545	68.3436	102.46	123.042
ENSMUSG00000018476.7	Kdm6b	913.531	2.83008	0.606605	4.66545	3.07939e-06	3.32387e-05	282.766	141.407	256.438	1451.59	435.415	799.974	2819.69	373.429	1661.07
ENSMUSG00000024570.6	Rbfa	1387.95	-0.769901	0.165019	-4.66552	3.07837e-06	3.32387e-05	2051.56	1578.28	1795.76	1318.19	1216.24	1345.63	917.461	1142.3	1126.15
ENSMUSG00000059994.10	Fcrl1	1389.65	-1.04679	0.224397	-4.66489	3.08783e-06	3.33111e-05	1789.85	1758.46	1576.16	1610.19	1657.51	1636.97	687.578	1122.83	667.346
ENSMUSG00000042622.14	Maff	733.753	4.38182	0.939626	4.66337	3.11072e-06	3.35391e-05	158.429	29.6499	61.8509	653.031	147.822	318.625	3057.86	359.033	1817.47
ENSMUSG00000103473.1	RP23-390C13.3	108.246	-1.91207	0.410087	-4.66259	3.12256e-06	3.36478e-05	104.283	248.603	135.516	96.0889	155.871	106.208	26.9232	55.8873	44.8373
ENSMUSG00000021908.10	RP24-250I16.1	1020.18	-1.17501	0.252188	-4.65927	3.1734e-06	3.41764e-05	1715.65	1343.37	1260.65	1083.1	936.692	927.619	869.827	482.663	562.03
ENSMUSG00000086561.1	AC115865.2	38.9448	1.9765	0.424347	4.65774	3.19703e-06	3.44116e-05	15.0408	20.5268	12.5092	38.249	42.4439	40.9244	77.6632	36.4114	66.7346
ENSMUSG00000014164.15	Klhl3	17.4087	-3.28518	0.705598	-4.65588	3.22592e-06	3.46836e-05	23.0625	50.1767	31.2729	6.53031	19.7583	15.5902	1.03551	5.08066	4.17091
ENSMUSG00000036934.9	RP23-211B19.2	333.592	0.816764	0.175425	4.65592	3.22545e-06	3.46836e-05	219.595	273.691	229.335	305.059	350.528	364.422	376.925	434.397	448.373
ENSMUSG00000042444.10	Fam63b	4171.24	-0.845923	0.181707	-4.65542	3.23319e-06	3.47183e-05	4814.05	5576.45	5804.95	3730.67	4640.29	3965.77	2452.08	3369.33	3187.62
ENSMUSG00000086600.8	AC120859.3	232.433	-1.5527	0.33353	-4.65535	3.23427e-06	3.47183e-05	443.201	476.678	238.369	244.42	141.236	154.928	155.326	126.17	111.572
ENSMUSG00000098886.1	Mir6385	24.5272	2.32356	0.499117	4.65533	3.23458e-06	3.47183e-05	5.01359	4.56152	8.33945	30.7858	43.1757	32.1549	35.2073	27.0969	34.41
ENSMUSG00000025791.18	Pgm2	1708.92	0.837973	0.180012	4.6551	3.23827e-06	3.47384e-05	1209.28	1334.24	1168.22	1619.52	1837.53	1587.28	1958.15	2699.52	1966.58
ENSMUSG00000048118.17	Arid4a	6051.17	1.43033	0.307308	4.6544	3.2493e-06	3.48373e-05	2622.11	2084.61	2692.95	10897.2	6722.23	9488.6	8381.41	3928.2	7643.2
ENSMUSG00000025498.15	Irf7	7711.62	2.11181	0.453923	4.65234	3.28188e-06	3.5167e-05	2384.46	4962.93	1188.37	8135.84	9781.11	6090.91	11912.5	16653.6	8294.9
ENSMUSG00000111888.1	RP23-378J3.3	30.9459	2.12228	0.456502	4.64901	3.33532e-06	3.57196e-05	11.0299	18.2461	6.25458	38.249	38.7849	28.2573	54.882	43.1856	39.6237
ENSMUSG00000053338.9	Tarm1	56.698	2.64253	0.568443	4.64871	3.34014e-06	3.57512e-05	11.0299	15.9653	6.25458	140.868	82.6924	60.4121	94.2313	68.5889	30.2391
ENSMUSG00000031079.12	Zfp300	22.7187	-2.52269	0.54291	-4.64661	3.37442e-06	3.60779e-05	40.1087	36.4921	27.1032	28.92	26.3445	28.2573	3.10653	11.0081	3.12818
ENSMUSG00000040102.10	Klhl42	382.852	-1.38066	0.297129	-4.64669	3.37301e-06	3.60779e-05	619.68	412.817	659.511	382.49	291.985	426.783	155.326	204.073	293.007
ENSMUSG00000095332.1	Gm9821	127.804	-2.00772	0.432096	-4.64646	3.37673e-06	3.60824e-05	184.5	184.741	388.479	84.894	45.371	73.0792	34.1718	73.6696	81.3328
ENSMUSG00000098465.1	Mir1668	199.452	-1.34631	0.289773	-4.64606	3.38328e-06	3.61323e-05	377.022	200.707	325.933	209.903	133.186	190.006	130.474	119.396	108.444
ENSMUSG00000010392.8	Gosr1	2256.43	0.494922	0.106535	4.64565	3.3901e-06	3.61849e-05	1836.98	1924.96	1814.52	2393.83	2292.7	2194.33	2743.06	2540.33	2567.2
ENSMUSG00000103588.1	RP24-360E22.3	53.3247	7.2108	1.55279	4.64378	3.42094e-06	3.64938e-05	2.00544	0	0.694954	16.7922	7.31791	0.974389	361.393	71.976	18.7691
ENSMUSG00000004936.8	Map2k1	4835.64	0.700367	0.150841	4.64309	3.43232e-06	3.65949e-05	4294.64	3724.48	3522.72	4353.85	4788.11	4080.74	6947.23	6064.62	5744.39
ENSMUSG00000055675.6	Kbtbd11	84.5457	1.89941	0.40951	4.63825	3.5137e-06	3.74417e-05	26.0707	38.7729	50.0367	55.0412	58.5433	101.337	90.0893	157.501	183.52
ENSMUSG00000020658.10	Efr3b	206.656	1.4076	0.303606	4.63626	3.54767e-06	3.77827e-05	162.44	139.126	102.158	158.593	139.772	90.6182	405.919	265.041	396.237
ENSMUSG00000032567.16	Aste1	944.684	1.25679	0.271107	4.63576	3.5562e-06	3.78525e-05	386.046	335.271	541.369	1408.68	1312.1	1484.97	1216.72	682.502	1134.49
ENSMUSG00000024043.13	Arhgap28	33.3217	2.38579	0.51487	4.63377	3.59061e-06	3.81976e-05	7.01903	9.12303	12.5092	40.1148	51.9571	26.3085	54.882	67.7422	30.2391
ENSMUSG00000019461.12	Plscr3	1556.73	0.693723	0.149726	4.6333	3.59889e-06	3.82644e-05	1245.38	1176.87	1336.4	1431.07	1203.06	1528.82	1896.02	2017.87	2175.13
ENSMUSG00000093622.1	RP23-349B16.3	42.6751	-1.69794	0.366484	-4.63306	3.60297e-06	3.82865e-05	91.2473	72.9843	59.0711	29.8529	31.467	30.2061	31.0653	15.242	22.94
ENSMUSG00000027368.6	Dusp2	160.359	2.63706	0.569297	4.63214	3.61908e-06	3.84365e-05	100.272	45.6152	43.0871	37.3161	12.4404	22.411	603.702	132.097	446.288
ENSMUSG00000007827.10	Ankrd26	371.204	-0.85541	0.184699	-4.63138	3.63232e-06	3.85557e-05	422.144	428.783	518.436	422.604	351.26	437.501	240.238	236.251	283.622
ENSMUSG00000026219.14	Trip12	16073.5	0.567372	0.122534	4.63031	3.65119e-06	3.87346e-05	12141.9	13303.7	12957.4	17505	16750	15103	20451.3	18005.9	18443.8
ENSMUSG00000075415.13	Fnbp1	9203.46	-0.792739	0.171225	-4.6298	3.66013e-06	3.88079e-05	11676.7	10660.3	13870.6	9110.72	7501.59	9105.67	6132.28	7236.56	7536.84
ENSMUSG00000031200.16	Mtcp1	377.202	1.03344	0.223327	4.62747	3.70151e-06	3.92249e-05	208.565	260.006	282.846	303.193	434.684	368.319	438.02	585.123	514.065
ENSMUSG00000024451.8	Arap3	1561.21	-1.70689	0.369215	-4.62304	3.78158e-06	4.00513e-05	1650.47	2358.3	3467.82	1077.5	1276.97	1929.29	452.517	889.116	948.882
ENSMUSG00000087439.1	AC118260.5	17.8672	2.63994	0.571084	4.62269	3.78789e-06	4.0096e-05	9.02446	4.56152	4.86468	8.39611	8.0497	7.79512	41.4203	24.5565	52.1364
ENSMUSG00000072762.9	AC162689.1	106.251	-1.20032	0.259701	-4.62194	3.80167e-06	4.02196e-05	151.41	132.284	135.516	107.284	119.282	128.619	44.5269	77.9035	59.4355
ENSMUSG00000097534.3	RP24-337F7.1	90.513	2.02246	0.437742	4.62022	3.83332e-06	4.05321e-05	33.0897	54.7382	22.2385	118.479	106.841	51.6426	164.646	165.968	96.9737
ENSMUSG00000028821.8	Syf2	2948.08	0.745994	0.161474	4.6199	3.83923e-06	4.05723e-05	2746.44	2084.61	2262.07	2556.15	2264.89	2709.78	3916.29	3713.12	4279.36
ENSMUSG00000037257.8	Aagab	3293.13	-0.638385	0.138186	-4.61974	3.84227e-06	4.0582e-05	4322.72	3854.48	4077.29	3350.05	2898.62	3259.33	2340.25	2691.9	2843.52
ENSMUSG00000029314.14	Agpat9	138.124	2.32494	0.50356	4.617	3.89327e-06	4.1098e-05	21.0571	47.8959	35.4426	103.552	342.478	181.236	112.87	255.727	142.854
ENSMUSG00000030760.14	Acer3	3179.59	0.668598	0.144834	4.6163	3.90644e-06	4.11917e-05	2362.4	2732.35	2485.15	2744.6	3189.88	3063.48	4477.54	3636.06	3924.83
ENSMUSG00000060029.13	RP23-100C5.2	2046.44	-0.845322	0.183113	-4.61638	3.90483e-06	4.11917e-05	2399.5	2559.01	2863.21	1851.81	1910.71	2479.82	1256.07	1604.64	1493.19
ENSMUSG00000021678.9	F2rl1	10.6752	6.19121	1.34193	4.61366	3.95636e-06	4.16951e-05	0	0	0.694954	1.8658	0.731791	1.94878	38.3138	11.8549	40.6664
ENSMUSG00000102418.1	Sh2d1b1	146.637	-2.90542	0.630263	-4.60985	4.02953e-06	4.2443e-05	139.378	424.221	282.846	56.907	190.266	114.004	10.3551	69.4357	32.3246
ENSMUSG00000028803.18	Nipal3	1926.39	-1.56753	0.340178	-4.60798	4.06592e-06	4.28027e-05	2489.75	2086.89	3665.88	1946.97	1487	2878.35	639.944	892.503	1250.23
ENSMUSG00000059456.13	Ptk2b	10863.2	0.705455	0.153189	4.60513	4.12215e-06	4.33708e-05	7903.42	7551.59	8952.39	12153.8	9879.91	11515.3	14778.8	12291.8	12742.1
ENSMUSG00000026017.13	Carf	204.988	-0.908542	0.197347	-4.60377	4.14903e-06	4.36058e-05	225.612	237.199	309.949	216.433	213.683	227.033	142.9	135.484	136.597
ENSMUSG00000042167.6	Papd4	3398.7	0.912806	0.198269	4.60387	4.14708e-06	4.36058e-05	2609.07	2381.11	2268.33	3186.79	3492.84	2983.58	5820.59	3904.49	3941.51
ENSMUSG00000015214.14	Mtmr1	1748.06	0.814666	0.176993	4.60282	4.16807e-06	4.37579e-05	1370.72	1354.77	1216.86	1626.05	1689.7	1543.43	2737.88	1859.52	2333.63
ENSMUSG00000047473.14	Zfp30	79.7923	-1.9353	0.420454	-4.60289	4.16677e-06	4.37579e-05	129.351	84.388	186.943	66.236	44.6392	100.362	27.9587	31.3307	46.9228
ENSMUSG00000097294.1	Gm26888	108.741	-1.68117	0.365374	-4.60121	4.20034e-06	4.40725e-05	180.489	125.442	197.367	118.479	69.5201	128.619	44.5269	38.105	76.1191
ENSMUSG00000037890.13	Wdr19	435.079	-0.968582	0.210704	-4.59688	4.28857e-06	4.49737e-05	484.313	474.398	669.241	458.055	499.081	495.964	235.06	324.316	275.28
ENSMUSG00000040396.12	Abhd13	2247.92	0.771898	0.168061	4.59297	4.36976e-06	4.58001e-05	1772.81	1569.16	1673.45	2193.25	2207.81	2243.04	3450.31	2421.78	2699.62
ENSMUSG00000056234.15	Ncoa4	2897.15	-1.2323	0.268394	-4.59138	4.4032e-06	4.61254e-05	5203.1	3496.4	3773.6	3125.22	2379.78	2784.81	2373.39	1281.17	1656.89
ENSMUSG00000003882.5	Il7r	3444.53	-1.39552	0.304025	-4.59015	4.42917e-06	4.6372e-05	4961.45	5610.66	3581.1	3633.65	4894.95	2941.68	2052.38	2164.36	1160.56
ENSMUSG00000033671.18	Cep350	6472.55	0.830959	0.181077	4.58898	4.45406e-06	4.66072e-05	4524.26	4504.5	5536	6515.38	5316.46	5935.98	9675.79	7129.02	9115.53
ENSMUSG00000026526.14	Fh1	4055.44	0.614208	0.13387	4.58809	4.47315e-06	4.67814e-05	2932.95	2600.06	2999.42	4518.98	4856.9	5515.04	4268.37	4301.63	4505.63
ENSMUSG00000035168.16	Tanc1	1418.2	1.07212	0.233706	4.58747	4.48645e-06	4.68949e-05	687.865	1119.85	1108.45	1147.47	1197.94	1377.79	2249.12	1687.63	2187.64
ENSMUSG00000005986.15	Ankrd13d	170.821	-1.63938	0.357394	-4.58705	4.4956e-06	4.69649e-05	218.593	223.514	441.991	122.21	92.9374	152.979	69.3791	108.387	107.401
ENSMUSG00000062526.3	Mppe1	1141.19	0.73352	0.159976	4.58519	4.53573e-06	4.73584e-05	778.109	748.089	976.41	1138.14	1132.81	1320.3	1343.05	1420.89	1412.9
ENSMUSG00000045691.14	Thtpa	534.24	-0.701141	0.152932	-4.58467	4.54712e-06	4.74515e-05	661.794	636.331	665.071	554.144	511.522	570.992	344.824	427.622	435.86
ENSMUSG00000056268.15	Dennd1b	2480.84	0.923054	0.20136	4.58409	4.55962e-06	4.7556e-05	1674.54	2066.37	1735.99	1934.84	2750.07	1792.88	3452.39	3609.81	3310.66
ENSMUSG00000091764.3	Zfp964	30.0107	-2.26347	0.49386	-4.58321	4.57894e-06	4.77315e-05	42.1142	36.4921	69.4954	34.5174	20.4901	35.078	12.4261	5.92744	13.5555
ENSMUSG00000014226.10	Cacybp	2479.71	1.11296	0.24293	4.58138	4.61908e-06	4.81238e-05	1652.48	2025.31	1239.8	1914.31	2864.23	2004.32	3704.01	3786.79	3126.1
ENSMUSG00000022220.14	Adcy4	18.6406	4.78159	1.04393	4.58038	4.64129e-06	4.83289e-05	2.00544	0	0.694954	20.5238	41.7121	17.539	17.6036	49.9598	17.7264
ENSMUSG00000039670.2	Oxld1	61.7534	-1.41725	0.309465	-4.57968	4.65684e-06	4.84645e-05	103.28	84.388	84.0894	48.5109	60.0068	73.0792	28.9942	29.6372	43.7946
ENSMUSG00000019952.15	Poc1b	679.531	-1.07867	0.235646	-4.57753	4.70509e-06	4.89401e-05	849.302	1010.38	904.135	593.325	784.48	668.431	317.901	557.179	430.647
ENSMUSG00000001052.15	Sec24b	3965.19	0.827559	0.180824	4.5766	4.72594e-06	4.90813e-05	3035.23	2800.77	3253.77	4003.08	3051.57	3400.62	6096.04	4474.37	5571.3
ENSMUSG00000029605.16	Oas1b	493.003	1.11953	0.244622	4.57658	4.72635e-06	4.90813e-05	178.484	328.429	206.401	662.36	790.334	746.382	475.298	570.728	478.612
ENSMUSG00000091514.2	RP23-322E23.8	217.07	-1.09485	0.239219	-4.57677	4.72217e-06	4.90813e-05	272.739	321.587	268.947	243.487	224.66	221.186	95.2668	170.202	135.555
ENSMUSG00000036964.14	Trim17	1375.98	1.21945	0.266737	4.57173	4.83714e-06	5.02046e-05	986.674	629.489	784.603	1787.44	1025.97	1566.82	2022.35	1537.75	2042.7
ENSMUSG00000031551.12	Ido1	7.03794	6.48297	1.41841	4.57059	4.86358e-06	5.04518e-05	0	0	0	0.932902	0.731791	3.89756	21.7457	11.0081	25.0255
ENSMUSG00000091474.2	RP23-147O14.2	372.604	-0.754893	0.165354	-4.56532	4.98722e-06	5.17063e-05	438.188	462.994	373.885	431.933	464.687	429.706	267.161	225.243	259.639
ENSMUSG00000107355.1	RP24-80F7.5	105.555	-1.65836	0.363433	-4.56304	5.04173e-06	5.22432e-05	160.435	177.899	163.314	79.2966	117.087	94.5158	32.1008	84.6777	40.6664
ENSMUSG00000053774.9	Ubxn7	1315.4	-0.821568	0.180066	-4.5626	5.05234e-06	5.23249e-05	1487.03	1553.2	2044.55	1227.7	1266.73	1377.79	885.36	917.059	1079.22
ENSMUSG00000022858.16	Tra2b	2103.37	1.02603	0.224994	4.56024	5.10957e-06	5.2889e-05	1366.7	1710.57	1067.45	2229.63	2142.68	1992.63	3371.62	2283.76	2765.31
ENSMUSG00000063160.12	Numbl	162.507	-1.19787	0.262874	-4.55684	5.19299e-06	5.37234e-05	235.639	198.426	281.456	130.606	125.136	177.339	79.7342	114.315	119.914
ENSMUSG00000028957.12	Per3	478.434	-1.54093	0.338194	-4.55635	5.20503e-06	5.38136e-05	612.661	515.451	986.139	547.613	341.014	573.915	213.315	186.291	329.502
ENSMUSG00000091649.3	Phf11b	1469.49	2.20052	0.482967	4.55626	5.20731e-06	5.38136e-05	501.359	985.287	227.945	1021.53	1842.65	796.076	2654.01	3322.75	1873.78
ENSMUSG00000029291.11	Rufy3	5594.4	1.06862	0.234636	4.55437	5.25423e-06	5.42691e-05	4627.54	3336.75	3733.99	5687.9	4163.16	4254.18	10337.5	6770.83	7437.78
ENSMUSG00000030339.7	Ltbr	4296.24	0.90702	0.199208	4.55314	5.28522e-06	5.45599e-05	2894.85	2638.84	2967.45	5002.22	3578.46	5635.87	5492.34	4741.95	5714.15
ENSMUSG00000021767.18	Kat6b	604.574	-1.02128	0.224355	-4.55208	5.3119e-06	5.48058e-05	832.256	688.789	885.371	750.053	483.714	611.917	370.712	352.259	466.099
ENSMUSG00000029016.13	Clcn6	1535.47	0.765178	0.1681	4.55192	5.31592e-06	5.48177e-05	976.647	1334.24	1310.68	1346.18	1407.23	1296.91	2217.02	1895.93	2034.36
ENSMUSG00000037509.20	Arhgef4	201.987	-1.62131	0.356255	-4.55098	5.33968e-06	5.50331e-05	346.94	228.076	456.585	152.063	97.3282	199.75	82.8407	117.702	136.597
ENSMUSG00000037523.13	Mavs	1408.81	-1.07011	0.235223	-4.54934	5.38139e-06	5.54034e-05	1946.28	1774.43	2457.36	1247.29	988.649	1320.3	731.069	1053.39	1160.56
ENSMUSG00000098650.1	RP23-242C19.7	8474.59	0.978182	0.215015	4.54936	5.38105e-06	5.54034e-05	4981.5	5528.56	5526.27	9325.28	8974.68	10344.1	13182	7581.19	10827.7
ENSMUSG00000053749.12	AC124659.2	52.6481	-1.55126	0.341036	-4.54869	5.3982e-06	5.55467e-05	88.2392	75.265	72.9701	64.3702	41.7121	50.6683	17.6036	29.6372	33.3673
ENSMUSG00000020475.3	Pgam2	199.589	1.34148	0.294999	4.54741	5.4309e-06	5.58532e-05	136.37	86.6688	126.482	217.366	122.209	208.519	310.653	248.106	339.929
ENSMUSG00000025017.9	Pik3ap1	17120.3	1.08978	0.239713	4.54618	5.4628e-06	5.61512e-05	13258.9	11289.8	9060.81	20647.9	13320.8	14972.5	28663.9	21470	21397.8
ENSMUSG00000037418.5	Best1	78.898	-1.70998	0.376157	-4.54593	5.46932e-06	5.61608e-05	131.356	152.811	113.277	73.6992	35.8577	81.8487	51.7754	28.7904	40.6664
ENSMUSG00000104654.1	RP24-166N8.9	51.4277	2.76659	0.608587	4.54592	5.4696e-06	5.61608e-05	20.0544	9.12303	18.7638	37.3161	14.6358	24.3597	179.143	36.4114	123.042
ENSMUSG00000020212.14	Mdm1	208.649	-1.61412	0.355102	-4.54552	5.47988e-06	5.62363e-05	231.628	396.852	286.321	188.446	321.988	155.902	76.6276	130.404	89.6746
ENSMUSG00000105311.1	RP23-214I6.5	19.6533	-2.28367	0.5031	-4.5392	5.64683e-06	5.79185e-05	35.0951	45.6152	29.1881	13.9935	11.7087	19.4878	5.17754	9.31455	7.2991
ENSMUSG00000043183.18	Simc1	148.741	-0.867179	0.191051	-4.539	5.65216e-06	5.79422e-05	187.508	200.707	202.232	143.667	141.967	138.363	123.226	95.6858	105.316
ENSMUSG00000031133.12	Arhgef6	8581.06	-0.826667	0.182222	-4.53659	5.71718e-06	5.85774e-05	9324.27	10838.2	11960.2	8721.7	9671.35	8602.88	4885.53	6923.25	6302.25
ENSMUSG00000024944.5	Arl2	1034.81	0.975899	0.215341	4.53187	5.84641e-06	5.98695e-05	793.15	636.331	664.376	1136.27	821.069	1137.11	1528.41	1103.35	1493.19
ENSMUSG00000038059.6	Smim3	350.828	-0.965473	0.213052	-4.53163	5.85295e-06	5.99045e-05	527.43	535.978	471.179	245.353	320.524	273.803	252.664	320.928	209.588
ENSMUSG00000023045.13	Soat2	85.5942	2.61437	0.576951	4.53135	5.86071e-06	5.99518e-05	7.01903	47.8959	10.4243	92.3573	152.212	99.3877	90.0893	158.347	112.615
ENSMUSG00000034663.13	Bmp2k	9302.57	1.46354	0.323131	4.52924	5.91956e-06	6.05216e-05	4132.2	3601.32	4570.71	15107.4	8972.49	13397.9	15389.7	6465.14	12086.3
ENSMUSG00000041930.7	Fam222a	31.6591	-3.26854	0.721829	-4.52813	5.95068e-06	6.08073e-05	121.329	15.9653	98.6834	13.9935	4.39074	5.84634	5.17754	10.1613	9.38455
ENSMUSG00000034575.13	Papd7	2085.5	1.18227	0.26111	4.52785	5.95861e-06	6.08559e-05	1124.05	1409.51	770.704	3062.72	2643.23	2281.05	3057.86	2260.89	2159.49
ENSMUSG00000052609.9	Plekhg3	1248.16	-1.65568	0.365687	-4.52759	5.96613e-06	6.09003e-05	2121.75	2018.47	3002.9	446.86	663.002	713.253	383.138	1095.73	788.302
ENSMUSG00000024158.17	Hagh	714.821	-0.966745	0.213547	-4.52708	5.9804e-06	6.10134e-05	1070.9	777.738	900.66	864.8	690.81	720.074	387.28	566.494	454.629
ENSMUSG00000042423.9	Fbrs	5929.19	1.35225	0.298916	4.52386	6.07231e-06	6.19182e-05	4055.99	2796.21	4860.51	4759.66	2657.86	4310.7	11509.7	7517.69	10894.4
ENSMUSG00000085684.2	RP23-73A4.3	207.606	2.52091	0.55749	4.52189	6.12894e-06	6.24624e-05	92.2501	27.3691	48.6468	332.113	135.381	252.367	501.186	119.396	359.741
ENSMUSG00000032377.8	Plscr4	451.203	-0.976964	0.216076	-4.5214	6.14325e-06	6.25417e-05	487.321	542.82	667.156	458.988	478.591	561.248	258.877	252.34	353.485
ENSMUSG00000035373.2	Ccl7	1979.9	4.22825	0.935147	4.52149	6.14063e-06	6.25417e-05	96.2609	296.499	34.7477	2034.66	6200.46	1191.68	2763.77	3889.25	1311.75
ENSMUSG00000028944.14	Prkag2	551.872	-1.54031	0.340717	-4.52079	6.1608e-06	6.26872e-05	790.142	558.786	1020.89	627.843	414.194	737.613	245.416	191.372	380.596
ENSMUSG00000032000.17	Birc3	7279.33	2.24216	0.496143	4.51917	6.20818e-06	6.31357e-05	4011.87	1498.46	2969.54	8166.62	3152.55	5579.35	20063	5600.58	14472
ENSMUSG00000057531.14	Dtnbp1	3596.82	-0.847535	0.187592	-4.51797	6.24352e-06	6.34614e-05	5153.97	4299.23	4090.5	4049.73	3825.07	3426.93	2490.4	2973.03	2062.52
ENSMUSG00000113204.1	RP23-95L9.5	251.452	-0.861294	0.190717	-4.51609	6.29923e-06	6.39938e-05	308.837	296.499	368.326	218.299	272.226	260.162	160.504	190.525	187.691
ENSMUSG00000090386.10	Mir99ahg	106.67	-1.61714	0.358355	-4.51268	6.40133e-06	6.49966e-05	108.294	271.41	165.399	61.5715	95.1328	82.8231	57.9885	55.8873	61.521
ENSMUSG00000028037.13	Ifi44	638.621	2.49313	0.552648	4.51124	6.445e-06	6.54053e-05	209.568	339.833	73.6651	473.914	900.834	267.957	875.005	1766.38	840.439
ENSMUSG00000071652.7	Ints5_1	1715.27	0.690527	0.153104	4.51017	6.4775e-06	6.57003e-05	1018.76	1149.5	974.325	2699.82	2272.94	2262.53	1762.44	1514.04	1783.06
ENSMUSG00000114493.1	RP24-320I19.2	1314.35	0.93457	0.207259	4.50918	6.50785e-06	6.59733e-05	862.337	748.089	1143.89	1154.93	1255.02	1380.71	1902.23	1494.56	1887.34
ENSMUSG00000063049.4	Ing2	199.344	-1.07187	0.237812	-4.50722	6.56813e-06	6.65492e-05	296.805	301.06	290.491	139.002	191.729	153.954	109.764	177.823	133.469
ENSMUSG00000033883.11	RP23-218L17.1	400.472	-0.883192	0.195977	-4.50661	6.58709e-06	6.66708e-05	489.326	570.19	478.823	366.63	455.174	414.116	222.634	313.307	294.049
ENSMUSG00000075700.9	Selt	8368.26	0.666612	0.147918	4.50663	6.58667e-06	6.66708e-05	5996.25	6666.66	6750.78	7200.13	8853.2	9032.59	10518.7	9402.61	10893.4
ENSMUSG00000084960.1	AC116511.4	28.5135	-2.40651	0.53403	-4.50632	6.59631e-06	6.67289e-05	55.1495	25.0883	82.0045	21.4567	21.2219	20.4622	5.17754	13.5484	12.5127
ENSMUSG00000028101.18	Pias3	509.922	-1.08997	0.241935	-4.5052	6.63115e-06	6.70459e-05	600.628	707.035	880.506	465.518	461.028	446.27	243.345	406.453	378.51
ENSMUSG00000055541.17	Lair1	6867.69	1.17116	0.25998	4.5048	6.6435e-06	6.71354e-05	4020.9	6091.9	3200.26	5445.35	7009.09	6087.01	11483.8	8416.96	10054
ENSMUSG00000069184.4	Zfp72	116.072	-1.34868	0.299584	-4.50184	6.73691e-06	6.80435e-05	142.386	187.022	182.773	85.8269	136.845	110.106	48.6689	86.3712	64.6491
ENSMUSG00000020102.15	Slc16a7	2216.43	-0.953312	0.211815	-4.50069	6.77344e-06	6.83764e-05	2880.81	2098.3	3302.42	2389.16	2157.32	2836.45	1530.48	1283.71	1469.2
ENSMUSG00000002910.11	Arrdc2	588.254	-1.22375	0.272014	-4.49885	6.83229e-06	6.89342e-05	917.487	793.704	1201.58	343.308	292.716	495.964	330.327	430.163	489.039
ENSMUSG00000095105.2	Edaradd	74.7298	-1.41916	0.315518	-4.49787	6.86374e-06	6.92151e-05	80.2174	100.353	144.55	86.7599	62.934	75.028	42.4559	40.6453	39.6237
ENSMUSG00000097354.7	RP24-530N5.3	175.98	0.782948	0.174115	4.49673	6.9006e-06	6.95502e-05	122.332	123.161	117.447	197.775	204.17	195.852	211.244	193.912	217.93
ENSMUSG00000033697.15	Arhgap39	522.164	-1.31424	0.292404	-4.49459	6.97036e-06	7.02164e-05	850.305	574.751	1038.96	443.128	305.157	493.041	272.339	309.92	411.878
ENSMUSG00000034394.14	Lif	20.5996	4.57829	1.01876	4.49396	6.99093e-06	7.03867e-05	2.00544	0	3.47477	12.1277	5.12254	5.84634	108.728	8.46777	39.6237
ENSMUSG00000054939.6	Zfp174	88.9649	-1.54495	0.344119	-4.48956	7.13691e-06	7.18186e-05	109.296	123.161	126.482	84.894	98.06	135.44	27.9587	33.8711	61.521
ENSMUSG00000085208.3	Brip1os	3836.71	0.896645	0.199777	4.48822	7.18209e-06	7.22354e-05	2168.88	3136.04	2958.42	3051.52	3954.6	3885.87	5287.31	4567.51	5520.2
ENSMUSG00000039910.10	Cited2	4233.94	1.4255	0.317768	4.48597	7.25831e-06	7.29638e-05	3465.39	1391.26	2382.3	4425.69	3278.42	3697.81	7379.03	5139.94	6945.61
ENSMUSG00000092310.2	RP24-280G4.3	171.842	1.02737	0.22904	4.48553	7.27339e-06	7.3077e-05	125.34	102.634	100.768	194.044	200.511	151.03	261.984	214.235	196.033
ENSMUSG00000040272.14	Accs	343.325	-0.856783	0.191023	-4.48525	7.283e-06	7.31353e-05	417.131	390.01	512.876	346.107	296.375	394.628	240.238	250.646	241.913
ENSMUSG00000028494.12	Plin2	12403.1	-1.38005	0.307862	-4.48269	7.37086e-06	7.39787e-05	21545.4	21569.1	13922.7	10894.4	13934	7850.66	8094.57	8916.56	4900.82
ENSMUSG00000029299.14	Abcg3	419.886	1.43515	0.320315	4.48044	7.44908e-06	7.46856e-05	173.47	312.464	202.927	276.139	406.876	561.248	582.991	526.695	736.166
ENSMUSG00000082321.3	RP24-114E18.6	544.951	1.27475	0.284511	4.48049	7.44721e-06	7.46856e-05	340.924	408.256	226.555	488.84	670.32	425.808	912.283	806.978	624.594
ENSMUSG00000045316.4	Fahd1	180.864	-1.40485	0.313722	-4.47801	7.53431e-06	7.55006e-05	311.845	200.707	296.745	179.117	125.868	206.571	69.3791	127.017	110.529
ENSMUSG00000024589.16	Nedd4l	1982.2	-0.85935	0.19195	-4.47695	7.57186e-06	7.58373e-05	2067.6	3126.92	2389.95	1794.9	2265.62	2020.88	1366.87	1392.1	1414.98
ENSMUSG00000074482.5	RP23-279E21.1	220.495	1.5512	0.346572	4.47583	7.61153e-06	7.61788e-05	116.315	187.022	67.4105	178.184	219.537	154.928	411.097	345.485	304.477
ENSMUSG00000115728.1	RP24-320A12.5	432.547	0.874829	0.195459	4.47576	7.61391e-06	7.61788e-05	332.902	342.114	295.355	414.208	381.263	352.729	717.608	493.671	563.073
ENSMUSG00000023088.17	Abcc1	6247.07	-0.913647	0.204172	-4.47488	7.64527e-06	7.64527e-05	7041.09	6434.02	9172	7444.55	5734.31	8370.98	3926.65	3919.73	4180.3
ENSMUSG00000105904.1	Mir24-1	29.6523	-2.19953	0.491627	-4.47398	7.67755e-06	7.67355e-05	55.1495	45.6152	50.7316	41.0477	23.4173	17.539	17.6036	8.46777	7.2991
ENSMUSG00000001229.8	Dpp9	2611.58	0.552784	0.123561	4.47378	7.68474e-06	7.67673e-05	2008.44	2130.23	2314.2	2660.64	2376.86	2542.18	3223.54	2964.57	3283.55
ENSMUSG00000042770.8	Hebp1	835.13	-0.639864	0.143059	-4.47272	7.72296e-06	7.7109e-05	1060.88	921.426	896.49	935.7	862.781	990.954	581.956	652.865	613.124
ENSMUSG00000020346.16	Mgat1	10117.3	0.613703	0.137314	4.46933	7.84655e-06	7.83021e-05	6608.91	5731.54	7056.56	13705.3	12922.7	15331	9635.41	10186.7	9877.76
ENSMUSG00000041164.15	Zmiz2	7166.16	1.0768	0.240941	4.46915	7.85295e-06	7.83252e-05	5894.98	3779.22	5326.13	7613.41	4780.79	5442.94	11661.9	9810.76	10185.4
ENSMUSG00000037940.17	Inpp4b	1008.68	1.19769	0.268034	4.46845	7.87902e-06	7.85444e-05	503.364	919.145	635.883	630.641	978.404	709.356	1633	1696.09	1372.23
ENSMUSG00000014504.16	Srp19	1139.42	0.738877	0.16537	4.46802	7.89469e-06	7.86597e-05	880.386	889.496	810.316	948.761	1331.86	1093.26	1386.55	1470	1444.18
ENSMUSG00000030774.13	Pak1	2153.09	0.768002	0.171903	4.46765	7.90851e-06	7.87564e-05	1435.89	1500.74	1802.02	2056.12	2191.71	2312.23	2573.24	2359.97	3145.91
ENSMUSG00000060913.6	Trim55	6.66765	6.11233	1.3684	4.46678	7.94052e-06	7.90342e-05	0	0	0	3.73161	5.85433	5.84634	8.28407	14.3952	21.8973
ENSMUSG00000020464.15	Pnpt1	2985.12	1.28146	0.286914	4.46634	7.95697e-06	7.91567e-05	1407.82	2107.42	1214.08	2960.1	4638.09	3063.48	3715.41	4691.99	3067.71
ENSMUSG00000071660.10	Ttc9c	1786.87	0.655381	0.146752	4.4659	7.97333e-06	7.92784e-05	1350.66	1589.69	1417.01	1538.35	1743.86	1591.18	2570.13	2155.89	2125.08
ENSMUSG00000033147.16	Slc22a15	279.981	1.23325	0.276269	4.46393	8.04717e-06	7.99711e-05	118.321	246.322	170.959	237.89	254.663	251.392	494.973	348.025	397.279
ENSMUSG00000073481.9	2023-03-02	2574.24	0.651667	0.146019	4.4629	8.08578e-06	8.03132e-05	1865.06	1888.47	1966.02	2399.42	2961.56	3100.51	3124.13	3069.57	2793.47
ENSMUSG00000060147.15	Serpinb6a	21212.7	-0.642838	0.144078	-4.46174	8.1297e-06	8.07076e-05	27298	24340.2	23651.4	19784	22725.8	24894.7	14861.6	16607.8	16750.4
ENSMUSG00000029650.10	Slc46a3	2389.97	-1.60047	0.358791	-4.46074	8.16782e-06	8.09602e-05	4554.34	1961.45	4902.9	2262.29	1404.31	2656.19	1146.31	1142.3	1479.63
ENSMUSG00000032194.9	Kank2	1237.64	-1.35998	0.304874	-4.46079	8.16574e-06	8.09602e-05	1779.82	1452.84	2251.65	1248.22	809.361	1457.69	600.595	569.881	968.694
ENSMUSG00000116632.1	RP23-68E6.1	85.0708	-1.20785	0.270771	-4.46078	8.16619e-06	8.09602e-05	128.348	100.353	159.144	70.9005	64.3976	72.1048	46.5979	64.355	59.4355
ENSMUSG00000032340.8	Neo1	260.149	-1.25275	0.28086	-4.46038	8.18133e-06	8.10523e-05	287.78	444.748	300.22	307.858	316.134	255.29	140.829	186.291	102.187
ENSMUSG00000074247.10	Dda1	1325.65	0.620785	0.139194	4.45985	8.20151e-06	8.12102e-05	1152.12	1021.78	1054.94	1297.67	1176.72	1255.01	1770.72	1465.77	1736.14
ENSMUSG00000108511.1	RP23-133N24.2	440.764	-0.842211	0.189028	-4.45548	8.37071e-06	8.28429e-05	557.511	428.783	629.628	461.786	496.154	484.272	325.15	271.815	311.776
ENSMUSG00000045968.7	Teddm2	360.837	-1.82787	0.410297	-4.45499	8.38977e-06	8.29886e-05	911.471	449.309	425.312	483.243	167.58	306.933	186.392	160.888	156.409
ENSMUSG00000059920.9	RP23-32M15.2	766.954	0.883056	0.198272	4.45375	8.43818e-06	8.34244e-05	601.631	565.628	437.821	757.516	870.099	717.151	1150.45	872.18	930.113
ENSMUSG00000018160.15	Med1	2734.39	0.677728	0.152237	4.45179	8.51575e-06	8.41479e-05	1835.98	2383.39	2209.95	2618.65	2766.9	2521.72	3364.37	3161.02	3747.56
ENSMUSG00000070942.8	Il1rl2	51.6234	-2.5795	0.579515	-4.45114	8.54138e-06	8.43143e-05	50.1359	104.915	105.633	27.987	54.1525	78.9255	10.3551	26.2501	6.25637
ENSMUSG00000110424.1	RP23-336M16.3	18.6013	-2.43411	0.546839	-4.45124	8.53759e-06	8.43143e-05	30.0815	50.1767	31.2729	7.46321	10.9769	17.539	5.17754	8.46777	6.25637
ENSMUSG00000043290.6	Zfp784	120.259	-1.20794	0.271507	-4.44901	8.62681e-06	8.51137e-05	180.489	125.442	205.706	125.942	89.2785	130.568	78.6987	71.1293	75.0764
ENSMUSG00000018008.8	Cyth4	12480.5	-0.723158	0.162591	-4.44771	8.67912e-06	8.55857e-05	17922.6	16284.6	18466.3	9767.48	7783.33	10188.2	9638.51	10424.7	11848.5
ENSMUSG00000028229.11	Rmdn1	462.992	-1.23879	0.278728	-4.44444	8.81213e-06	8.68527e-05	772.093	419.659	836.724	480.444	338.087	456.014	296.155	272.662	295.092
ENSMUSG00000111118.1	RP24-84E18.1	165.697	3.0192	0.679499	4.44327	8.86021e-06	8.72817e-05	75.2038	22.8076	11.1193	250.018	180.021	62.3609	388.316	370.042	131.384
ENSMUSG00000097081.1	RP23-41J14.4	154.43	1.93998	0.43667	4.44266	8.88529e-06	8.74838e-05	83.2256	57.019	50.7316	203.373	101.719	158.825	367.606	120.242	247.127
ENSMUSG00000101903.1	RP23-218F13.7	10.4573	-5.43748	1.224	-4.44239	8.89647e-06	8.7549e-05	43.1169	25.0883	15.289	0.932902	2.92716	4.87195	0	0.846777	1.04273
ENSMUSG00000003123.15	Lipe	1416.04	0.790301	0.178009	4.43967	9.00973e-06	8.86098e-05	967.623	969.322	1073.01	1588.73	1206.72	1728.57	1610.22	1727.42	1872.74
ENSMUSG00000041729.15	Coro2b	17.1573	-2.80603	0.632049	-4.43958	9.01352e-06	8.86098e-05	31.0843	31.9306	25.0183	28.92	15.3676	9.74389	4.14203	5.08066	3.12818
ENSMUSG00000044629.5	Cnrip1	1620.69	-1.08934	0.245406	-4.43892	9.04098e-06	8.88343e-05	2334.33	1416.35	1939.62	2612.12	1688.24	1917.6	984.769	870.487	822.712
ENSMUSG00000074093.4	Svip	116.891	-1.15936	0.261207	-4.43845	9.0608e-06	8.89833e-05	158.429	132.284	173.043	125.942	100.987	151.03	80.7697	57.5808	71.9482
ENSMUSG00000026303.6	Mlph	24.6249	-2.46026	0.554466	-4.43718	9.11466e-06	8.94665e-05	41.1114	22.8076	61.1559	26.1212	23.4173	23.3853	4.14203	5.92744	13.5555
ENSMUSG00000041000.8	Trim62	196.361	-0.811457	0.182978	-4.43473	9.21866e-06	9.0441e-05	244.663	221.234	277.287	214.567	184.411	197.801	134.616	145.646	147.025
ENSMUSG00000103219.1	RP23-116M12.7	1301.3	1.54604	0.348782	4.43269	9.30634e-06	9.12545e-05	860.332	535.978	905.525	978.614	576.651	1117.62	2786.55	1385.33	2565.11
ENSMUSG00000028657.14	Ppt1	15562.1	0.973715	0.219711	4.4318	9.34515e-06	9.15882e-05	9255.09	9476.55	12753.8	14335.9	13645.7	18746.3	20692.6	17128.6	24024.5
ENSMUSG00000048707.9	Tprn	360.062	-1.0997	0.248195	-4.43079	9.38898e-06	9.19707e-05	478.296	469.836	567.777	314.388	303.693	398.525	162.575	274.356	271.109
ENSMUSG00000038459.10	Abhd17c	1411.6	1.30176	0.293822	4.43043	9.4046e-06	9.20767e-05	813.204	809.669	649.087	1915.25	1451.87	1468.4	2707.86	1236.29	1652.72
ENSMUSG00000036398.13	Ppp1r11	1055.26	0.729509	0.164751	4.42794	9.5139e-06	9.30993e-05	861.335	809.669	809.621	962.754	912.543	1025.06	1559.48	1130.45	1426.45
ENSMUSG00000070738.10	Dgkd	7508.13	-0.503719	0.113767	-4.42765	9.52648e-06	9.31748e-05	8725.65	8849.34	9317.94	7379.25	7696.24	6635.59	6542.34	6391.47	6035.31
ENSMUSG00000071862.2	Lrrtm2	42.787	3.08761	0.697391	4.42737	9.53906e-06	9.32502e-05	1.00272	18.2461	4.86468	59.7057	88.5467	40.9244	90.0893	38.9517	42.7518
ENSMUSG00000041707.8	RP24-456G16.4	2031.87	-1.80822	0.40857	-4.42572	9.61232e-06	9.39186e-05	2142.81	4431.51	3093.93	1211.84	2765.44	1882.52	558.139	1376.86	823.755
ENSMUSG00000028137.9	Celf3	32.8976	-2.16522	0.4893	-4.42513	9.63847e-06	9.41261e-05	35.0951	68.4227	77.8348	28.92	21.2219	24.3597	6.21305	15.242	18.7691
ENSMUSG00000001995.9	Sipa1l2	1244.22	-1.14835	0.259521	-4.42488	9.64943e-06	9.41851e-05	1751.75	1208.8	1509.44	2143.81	1226.48	1338.81	754.886	661.333	602.697
ENSMUSG00000021140.9	Pcnx	2675.86	0.762846	0.172452	4.42351	9.71094e-06	9.47373e-05	2043.54	1751.62	2136.98	2912.52	2332.95	2824.75	3719.55	2887.51	3473.33
ENSMUSG00000022799.4	Arhgap31	4102.69	-0.998921	0.225833	-4.42328	9.72152e-06	9.47922e-05	6200.81	4878.54	5504.73	5276.49	3242.56	3520.47	3139.66	2570.81	2590.14
ENSMUSG00000053101.3	Gpr141	1371.93	2.07155	0.468347	4.42311	9.72892e-06	9.48161e-05	298.81	935.111	330.798	863.867	2245.13	1126.39	2375.46	2456.5	1715.29
ENSMUSG00000036822.6	Topors	1677.82	-0.605691	0.136988	-4.42148	9.80266e-06	9.54863e-05	2290.21	2061.81	1849.27	1696.95	1630.43	1497.64	1409.33	1326.9	1337.82
ENSMUSG00000039735.15	Fnbp1l	2899.84	1.32377	0.2995	4.41994	9.87272e-06	9.61199e-05	1954.3	2356.02	1671.36	1727.73	1727.03	1698.36	6835.39	2851.1	5277.25
ENSMUSG00000024978.10	Gpam	453.254	-0.754945	0.170851	-4.41873	9.92822e-06	9.66112e-05	492.335	554.224	571.947	525.224	482.982	494.99	267.161	359.88	330.545
ENSMUSG00000060429.12	Sntb1	58.289	1.85865	0.420792	4.41703	1.00067e-05	9.73258e-05	23.0625	36.4921	25.0183	33.5845	65.8612	43.8475	71.4501	143.952	81.3328
ENSMUSG00000050578.10	Mmp13	3326.38	3.92898	0.889817	4.41549	1.0078e-05	9.79694e-05	252.685	517.732	159.839	3409.76	9530.84	1924.42	3224.57	9155.35	1762.21
ENSMUSG00000051650.11	B3gnt2	8002.78	1.0425	0.236186	4.41387	1.01537e-05	9.86052e-05	4550.33	4908.19	5197.56	8987.57	8245.09	9945.59	12836.2	6838.57	10515.9
ENSMUSG00000110397.1	RP23-466C10.2	18.8506	-5.7521	1.30316	-4.41396	1.01496e-05	9.86052e-05	29.0788	4.56152	120.922	5.59741	0.731791	5.84634	2.07102	0.846777	0
ENSMUSG00000020668.10	Kif3c	819.466	-0.900097	0.203956	-4.41318	1.01861e-05	9.88696e-05	1040.82	1233.89	1354.46	614.782	491.763	693.765	624.412	571.574	749.721
ENSMUSG00000031652.11	N4bp1	3549.21	1.37422	0.311398	4.41306	1.01918e-05	9.88748e-05	2358.39	1662.67	1929.89	4407.03	3192.8	2957.27	7293.09	3203.36	4938.36
ENSMUSG00000032531.15	Amotl2	122.702	1.99361	0.451779	4.41281	1.0204e-05	9.8943e-05	24.0652	18.2461	13.8991	290.132	390.776	145.184	90.0893	78.7503	53.1791
ENSMUSG00000079445.3	B3gnt7	196	2.14409	0.485909	4.41253	1.02167e-05	9.90167e-05	69.1875	66.142	118.837	120.344	76.1062	179.288	493.938	149.033	491.125
ENSMUSG00000019947.10	Arid5b	4968.34	1.30868	0.296655	4.41145	1.0268e-05	9.94636e-05	2914.9	1929.52	3258.64	6696.37	4174.13	5651.46	8259.22	4641.18	7189.61
ENSMUSG00000021838.17	Samd4	370.466	-4.34253	0.984516	-4.41083	1.02977e-05	9.97009e-05	1261.42	207.549	870.777	528.955	79.0334	270.88	78.6987	11.8549	25.0255
ENSMUSG00000083218.2	AC121131.6	71.1765	1.27904	0.290323	4.40559	1.05497e-05	0.000102089	52.1413	43.3344	38.2225	74.6321	49.7618	58.4634	113.906	92.2987	117.828
ENSMUSG00000018405.7	Mrm1	238.893	-1.01599	0.230642	-4.40507	1.05751e-05	0.000102273	360.978	332.991	330.798	200.574	218.074	200.724	118.048	207.46	180.392
ENSMUSG00000079227.10	Ccr5	14720.4	1.05827	0.240245	4.40498	1.05794e-05	0.000102273	6416.39	10737.8	6505.46	17358.5	21645.6	20575.2	18825.5	15454.5	14964.2
ENSMUSG00000045411.16	AC152939.2	408.824	-0.771252	0.175159	-4.40315	1.0669e-05	0.000103087	607.647	538.259	618.509	336.777	250.272	290.368	376.925	321.775	338.887
ENSMUSG00000021978.9	Extl3	6697.68	1.33452	0.303146	4.40225	1.07132e-05	0.000103462	2703.33	3142.88	3754.14	8779.54	5778.22	11906.1	7797.38	6061.23	10356.4
ENSMUSG00000089961.1	RP23-308E4.6	8.43252	6.76935	1.5378	4.40196	1.07276e-05	0.000103549	0	0	0	3.73161	0.731791	0.974389	45.5624	5.08066	19.8118
ENSMUSG00000059479.7	B3gnt8	2659.05	-1.09462	0.248815	-4.39936	1.08571e-05	0.000104746	3945.7	3546.58	4759.04	1742.66	1773.86	2425.26	1359.62	2238.03	2140.72
ENSMUSG00000001786.14	Fbxo7	1055.83	0.83659	0.190214	4.39815	1.09176e-05	0.000105269	771.09	620.366	840.199	1140.01	928.642	1199.47	1490.1	1182.1	1330.52
ENSMUSG00000024245.4	Tmem178	55.8524	2.27619	0.517543	4.39806	1.09222e-05	0.000105269	39.106	20.5268	13.2041	36.3832	14.6358	25.3341	144.971	67.7422	140.768
ENSMUSG00000098716.1	Gm28033	216.629	1.13761	0.258698	4.39746	1.09523e-05	0.000105505	130.353	180.18	172.349	110.082	146.358	152.005	433.878	270.969	353.485
ENSMUSG00000045287.6	Rtn4rl1	140.539	-2.48557	0.565266	-4.39717	1.09669e-05	0.000105593	175.476	141.407	408.633	89.5586	88.5467	230.93	21.7457	35.5646	72.991
ENSMUSG00000028107.14	Tars2	1040.9	1.02343	0.232838	4.39548	1.1053e-05	0.000106369	493.337	549.663	746.38	1246.36	1151.84	1533.69	1046.9	1133.83	1466.08
ENSMUSG00000021222.9	Dcaf4	201.426	-1.23626	0.281279	-4.39513	1.10707e-05	0.000106435	250.679	303.341	279.371	178.184	219.537	229.956	75.5921	158.347	117.828
ENSMUSG00000078580.3	RP24-443B5.2	155.855	-0.846272	0.192553	-4.39501	1.10766e-05	0.000106435	208.565	200.707	182.773	154.862	153.676	173.441	101.48	104.154	123.042
ENSMUSG00000085178.1	Kdm6bos	104.248	2.81819	0.641222	4.39503	1.10757e-05	0.000106435	24.0652	22.8076	29.883	169.788	48.2982	97.4389	303.404	42.3388	200.204
ENSMUSG00000071855.4	Ccdc112	141.208	-1.4207	0.323312	-4.39419	1.11186e-05	0.000106785	236.641	155.092	284.931	98.8876	99.5235	140.312	66.2726	74.5164	114.7
ENSMUSG00000055200.7	Sertad3	631.571	1.13047	0.25739	4.39207	1.12275e-05	0.000107777	322.875	499.486	427.397	477.646	700.324	532.017	737.282	1127.91	859.208
ENSMUSG00000026933.17	Camsap1	803.201	0.908398	0.206904	4.39044	1.13122e-05	0.000108536	601.631	629.489	726.922	616.648	414.925	558.325	1234.33	1057.62	1388.91
ENSMUSG00000116033.1	RP23-278C10.6	8.04107	5.96853	1.35966	4.38973	1.1349e-05	0.000108834	0	0	0	13.0606	12.4404	6.82073	12.4261	20.3226	7.2991
[truncated: 25,992 more rows]

## Sheet: IFNG 2h vs UT (Piccolo)
Gene ID	Gene name	baseMean	log2FoldChange	lfcSE	stat	pvalue	padj	BMDM_UT_R1	BMDM_UT_R2	BMDM_UT_R3	BMDM_IFNG_2h_R1	BMDM_IFNG_2h_R2	BMDM_IFNG_2h_R3	BMDM_IFNG_4h_R1	BMDM_IFNG_4h_R2	BMDM_IFNG_4h_R3
ENSMUSG00000009585.18	Apobec3	8823.64	2.22427	0.100284	22.1798	5.38194e-109	1.03172e-104	2565.96	2383.39	2451.1	11644.5	11218.4	11743.3	12499.6	11900.6	13005.9
ENSMUSG00000038037.5	Socs1	2933.21	6.82811	0.32608	20.94	2.31498e-97	2.21891e-93	56.1522	31.9306	18.7638	4476.06	3882.88	3687.09	5300.77	4187.31	4757.97
ENSMUSG00000025887.10	Casp12	768.98	5.20094	0.281322	18.4875	2.60426e-76	1.66412e-72	39.106	25.0883	19.4587	1112.95	997.431	949.055	1500.45	1090.65	1186.62
ENSMUSG00000034842.16	Art3	9125.4	7.44675	0.407299	18.2833	1.125e-74	5.39155e-71	57.1549	45.6152	26.4082	6328.8	8442.67	7495	28103.7	9768.42	21860.8
ENSMUSG00000074342.3	AC121847.1	3654.3	3.67	0.20232	18.1396	1.55232e-73	5.95158e-70	360.978	504.048	445.465	6050.8	4676.87	5879.47	5672.52	5053.56	4244.95
ENSMUSG00000034855.13	Cxcl10	145369	7.03746	0.401133	17.544	6.6128e-69	2.11279e-65	1382.75	868.969	510.096	134357	108526	119854	425142	163906	353773
ENSMUSG00000041481.16	Serpina3g	31064.7	7.18353	0.420841	17.0695	2.50545e-65	6.86134e-62	160.435	139.126	49.3417	21595.7	12512.2	16138.8	102915	51025.1	75046.2
ENSMUSG00000054072.11	Iigp1	68346.3	7.07659	0.417253	16.96	1.62482e-64	3.89348e-61	570.547	289.656	187.638	51579.2	35005.9	54925.4	209521	93806	169232
ENSMUSG00000024754.12	Tmem2	8774.03	4.22299	0.250075	16.8869	5.61914e-64	1.19688e-60	783.123	1040.03	815.181	18070.3	13668.4	17427.9	11037.5	6276.31	9847.52
ENSMUSG00000079363.7	Gbp4	9107.71	5.94868	0.361852	16.4395	9.96937e-61	1.91113e-57	51.1386	31.9306	17.3738	1829.42	1950.95	2349.25	30364.2	17899.2	27475.9
ENSMUSG00000066363.12	Serpina3f	10309.1	7.64352	0.47261	16.173	7.81921e-59	1.36268e-55	54.1468	36.4921	16.6789	9222.67	4967.4	7030.22	35985	12368	23101.6
ENSMUSG00000050075.8	Gpr171	384.634	4.68997	0.296202	15.8337	1.82133e-56	2.90957e-53	30.0815	41.0536	21.5436	729.529	785.211	733.715	485.654	329.396	305.519
ENSMUSG00000033294.11	Noc4l	2593.39	2.67448	0.169236	15.8033	2.95353e-56	4.35532e-53	472.28	542.82	436.431	3485.32	2881.06	2848.14	4738.49	4051.83	3884.16
ENSMUSG00000045092.8	S1pr1	1625.86	-3.72256	0.235829	-15.785	3.94479e-56	5.40155e-53	4599.47	3560.26	5185.05	367.563	326.379	317.651	104.586	109.234	62.5637
ENSMUSG00000023206.16	Il15ra	1057.77	2.66515	0.169663	15.7085	1.3234e-55	1.6913e-52	158.429	187.022	221.69	1180.12	1225.02	1212.14	1679.6	1914.56	1741.36
ENSMUSG00000040253.15	Gbp7	21773.8	4.19396	0.270247	15.519	2.5798e-54	3.09092e-51	1619.39	1277.22	1101.5	26497.2	20159.4	26519	50911.8	26855.5	41023
ENSMUSG00000025165.12	Sectm1a	1075.11	7.85282	0.517246	15.182	4.65435e-52	5.24847e-49	6.01631	6.84227	0.694954	625.044	1004.02	868.181	2437.59	2181.3	2546.34
ENSMUSG00000070730.11	Rmdn3	5486.87	2.78988	0.189367	14.7327	3.9751e-49	4.23349e-46	843.286	695.631	837.419	5543.3	4777.86	6158.14	11668.1	8393.25	10464.8
ENSMUSG00000019842.6	Traf3ip2	515.934	2.01334	0.136934	14.703	6.16851e-49	6.2237e-46	193.525	223.514	200.147	835.88	834.973	795.102	529.145	509.76	521.364
ENSMUSG00000029265.4	Dr1	11451.5	2.29223	0.159353	14.3846	6.46388e-47	6.19563e-44	3194.66	3619.56	3448.36	16147.6	18788	15311.6	16372.4	12893.9	13287.5
ENSMUSG00000029204.7	Rhoh	1462.96	1.92254	0.135871	14.1497	1.87422e-45	1.7109e-42	490.329	483.521	412.108	1826.62	1750.44	1652.56	2299.86	2144.89	2106.31
ENSMUSG00000064181.6	Rab3ip	518.028	2.22467	0.157951	14.0845	4.72858e-45	4.12031e-42	145.394	130.003	172.349	713.67	709.105	711.304	716.572	698.591	665.26
ENSMUSG00000036362.2	P2ry13	2018.5	2.38194	0.16944	14.0577	6.90557e-45	5.75565e-42	551.495	634.051	590.711	2545.89	3419.66	3271.03	2586.7	2357.43	2209.54
ENSMUSG00000030156.5	Cd69	3227.36	5.36455	0.381715	14.0538	7.30101e-45	5.83168e-42	110.299	66.142	56.2913	2732.47	4345.37	2539.26	8625.79	3733.44	6837.17
ENSMUSG00000069874.7	Irgm2	20220	3.75503	0.269478	13.9344	3.91325e-44	3.00068e-41	1901.15	2517.96	1459.4	28925.5	19961.1	30368.8	36355.7	25146.7	35343.3
ENSMUSG00000105338.1	RP23-100J23.5	3534.2	4.19809	0.303687	13.8237	1.83312e-43	1.35158e-40	278.756	191.584	178.603	4545.1	3065.47	4323.37	8270.61	4224.57	6729.77
ENSMUSG00000104713.4	Gbp6	6145.1	5.39508	0.391273	13.7885	2.98761e-43	2.1212e-40	80.2174	59.2997	26.4082	2539.36	1971.44	2378.48	21618.3	10336.6	16295.8
ENSMUSG00000016087.13	Fli1	2410.58	-2.28394	0.166774	-13.6948	1.08997e-42	7.46239e-40	4935.38	4598.01	3846.57	956.224	830.582	960.748	1619.54	2017.02	1931.13
ENSMUSG00000018899.16	Irf1	65254.1	4.30278	0.314416	13.685	1.24828e-42	7.97649e-40	4878.22	3085.87	3458.09	93007.5	53568.5	78914.8	148335	75568.9	126470
ENSMUSG00000029417.9	Cxcl9	83730.7	8.21325	0.600123	13.6859	1.2319e-42	7.97649e-40	158.429	84.388	51.4266	38039.1	13951.6	35360.6	368652	59407.3	237871
ENSMUSG00000050370.4	Ch25h	3811.1	5.94628	0.435089	13.6668	1.60265e-42	9.91055e-40	45.1223	130.003	54.2064	2544.02	6893.47	4291.21	5497.52	6934.26	7910.13
ENSMUSG00000026580.16	Selp	1957.31	8.60237	0.631474	13.6227	2.93613e-42	1.75893e-39	3.00815	6.84227	9.0344	3222.24	1077.93	3138.51	5194.11	1366.7	3597.41
ENSMUSG00000105504.4	Gbp5	37544.8	6.13275	0.459422	13.3488	1.20335e-40	6.99034e-38	703.908	253.164	337.053	35163.9	20614.5	35235.9	116473	37726.5	91395.1
ENSMUSG00000082292.3	RP24-499A8.3	15079.6	4.87653	0.366692	13.2987	2.35411e-40	1.3273e-37	595.614	1113.01	328.018	20466	18924.8	20143.6	28996.3	21560.6	23588.6
ENSMUSG00000073555.1	AC102225.2	3751.16	4.72688	0.359103	13.163	1.43252e-39	7.84613e-37	191.519	141.407	79.9197	3458.27	2655.67	4772.56	7822.23	5339.78	9299.05
ENSMUSG00000091191.1	Gm17334	5060.8	4.33034	0.329242	13.1525	1.6471e-39	8.7708e-37	396.074	221.234	250.878	7456.68	4387.09	5684.59	11942.5	6069.7	9138.47
ENSMUSG00000078853.8	Igtp	33924.3	4.28342	0.325806	13.1471	1.76729e-39	9.15649e-37	1575.27	1767.59	1002.82	29172.8	19641.3	35716.2	88103.1	47663.4	80675.9
ENSMUSG00000030966.13	Trim21	6983.09	2.7052	0.206683	13.0887	3.82156e-39	1.92787e-36	1620.39	2210.05	1503.88	9923.27	13952.3	10836.2	7401.82	7922.45	7477.4
ENSMUSG00000037447.16	Arid5a	7954.96	4.04698	0.309742	13.0657	5.17206e-39	2.54227e-36	938.544	775.458	847.844	17953.7	10680.5	13739.9	12374.3	5487.96	8796.45
ENSMUSG00000041836.10	Ptpre	1439.36	-2.37219	0.183712	-12.9125	3.82477e-38	1.83302e-35	2875.8	2449.53	3291.3	597.057	496.154	573.915	756.957	950.084	963.481
ENSMUSG00000037731.5	Themis2	30105.2	2.56671	0.201752	12.7221	4.45799e-37	2.08438e-34	5652.32	5298.2	5428.98	37065.1	25377.8	34607.4	57966.7	42393.9	57156.1
ENSMUSG00000092021.8	Gbp11	1253.8	7.38505	0.58321	12.6628	9.50852e-37	4.33996e-34	6.01631	4.56152	2.08486	619.447	461.76	901.31	3600.46	1701.17	3987.39
ENSMUSG00000037946.11	Fgd3	2426.55	-3.46169	0.274275	-12.6213	1.61206e-36	7.1868e-34	5107.85	5143.11	6458.9	489.773	432.488	595.352	765.241	1542.83	1303.41
ENSMUSG00000048852.13	RP23-14F5.7	1779.2	4.66569	0.372776	12.516	6.09967e-36	2.65751e-33	39.106	45.6152	38.9174	1202.51	824.728	1080.6	6099.15	2197.39	4484.77
ENSMUSG00000050919.9	Zfp366	118.32	4.96492	0.397698	12.4842	9.10918e-36	3.88051e-33	10.0272	4.56152	7.64449	258.414	211.488	273.803	96.3023	79.597	123.042
ENSMUSG00000029279.15	Brdt	301.346	3.29584	0.264744	12.4492	1.41312e-35	5.88903e-33	32.087	52.4574	40.3073	368.496	460.296	354.678	540.536	482.663	380.596
ENSMUSG00000049657.9	Zbtb5	2511.86	2.56431	0.206104	12.4418	1.54952e-35	6.32008e-33	709.924	679.666	680.36	4730.74	3608.46	3907.3	3284.63	2115.25	2890.44
ENSMUSG00000078921.3	Tgtp2	4678.11	5.21322	0.420738	12.3907	2.93642e-35	1.17273e-32	115.313	123.161	35.4426	3524.5	3022.3	3439.59	14773.6	6886.84	10182.2
ENSMUSG00000068606.5	Gm4841	2465.54	8.48098	0.697655	12.1564	5.30372e-34	2.07494e-31	9.02446	0	4.16972	2064.51	758.135	2504.18	8003.45	1901.86	6944.57
ENSMUSG00000112843.1	RP23-325K4.10	330.077	2.44667	0.201863	12.1204	8.23263e-34	3.15639e-31	88.2392	111.757	88.9541	546.68	493.227	504.734	442.162	326.856	368.083
ENSMUSG00000034118.15	Tpst1	2764.6	2.35146	0.195062	12.055	1.82566e-33	6.86232e-31	639.734	864.407	553.183	3684.03	3187.68	3558.47	4525.17	3932.43	3936.3
ENSMUSG00000079362.5	RP23-329M7.3	3811.51	5.11085	0.42703	11.9684	5.20533e-33	1.91896e-30	55.1495	50.1767	15.289	1614.85	1084.51	1347.58	13508.2	6662.44	9965.35
ENSMUSG00000036986.16	Pml	9093.39	2.43141	0.205031	11.8587	1.93859e-32	7.01183e-30	2013.46	2574.98	1796.46	13473.9	9712.33	11200.6	15246.8	12175.8	13646.2
ENSMUSG00000039782.14	Cpeb2	1070.97	-1.94473	0.164892	-11.794	4.19203e-32	1.48817e-29	2063.59	1655.83	2106.4	562.54	478.591	475.502	697.933	789.196	809.157
ENSMUSG00000054676.15	RP23-89C10.1	3574.61	1.97567	0.168283	11.7402	7.933e-32	2.76501e-29	1214.29	1087.92	1189.07	5005.95	3702.86	5041.49	5326.66	4719.09	4884.14
ENSMUSG00000028268.14	Gbp3	26768.4	4.32889	0.37287	11.6097	3.68019e-31	1.25981e-28	1568.25	1076.52	634.493	25319.9	16138.2	24423.1	77486.1	36316.6	57952.7
ENSMUSG00000000562.5	Adora3	923.384	4.11119	0.355081	11.5782	5.31566e-31	1.75692e-28	119.323	68.4227	174.433	2431.14	1457	2490.54	621.305	381.05	567.244
ENSMUSG00000028270.12	Gbp2	196624	5.57932	0.481874	11.5784	5.30312e-31	1.75692e-28	3927.65	1756.18	1073.7	115253	78775.1	129103	653168	228250	558311
ENSMUSG00000022126.6	Acod1	41869.5	6.21721	0.537533	11.5662	6.1139e-31	1.9865e-28	506.373	196.145	124.397	29991.9	13733.5	17864.5	168026	51055.6	95327.2
ENSMUSG00000014599.10	Csf1	2339.85	2.66268	0.230578	11.5479	7.56865e-31	2.41818e-28	589.598	465.275	349.562	2914.38	3129.87	2836.45	4005.35	2889.2	3878.95
ENSMUSG00000112627.1	RP23-413G8.2	609.978	2.21595	0.193654	11.4428	2.5547e-30	8.02846e-28	104.283	111.757	113.972	491.639	484.445	557.351	1222.94	1018.67	1384.74
ENSMUSG00000032841.15	Prr5l	2027.03	3.34278	0.295044	11.3297	9.34863e-30	2.89054e-27	204.554	417.379	225.86	2684.89	2922.04	2891.01	3467.92	2184.68	3244.97
ENSMUSG00000032578.7	Cish	970.461	5.23944	0.465798	11.2483	2.36023e-29	7.18185e-27	44.1196	22.8076	50.0367	1938.57	949.864	1654.51	1979.89	583.429	1510.91
ENSMUSG00000061411.12	Nol4l	640.148	-2.5457	0.227413	-11.1942	4.35477e-29	1.30439e-26	1099.98	1227.05	1404.5	213.634	169.775	257.239	368.641	497.058	523.449
ENSMUSG00000039699.13	Batf2	8297.46	4.69334	0.419333	11.1924	4.44311e-29	1.31038e-26	294.799	294.218	183.468	9207.74	4289.76	6434.87	27315.7	8632.04	18024.6
ENSMUSG00000026159.13	Agfg1	6736.38	1.60787	0.144279	11.1442	7.64489e-29	2.22049e-26	2718.37	3085.87	2658.89	8966.12	8781.49	8020.2	9970.91	8293.33	8132.24
ENSMUSG00000033538.13	Casp4	7886.52	2.8827	0.259437	11.1113	1.10495e-28	3.16149e-26	1498.06	1224.77	779.043	9072.47	8151.42	8578.52	17084.9	12148.7	12440.8
ENSMUSG00000017756.9	Slc12a7	7149.98	1.52973	0.13769	11.1099	1.12245e-28	3.16432e-26	3163.58	3594.47	3239.18	10372.9	8515.12	9956.31	8121.49	9118.94	8267.79
ENSMUSG00000053931.11	Cnn3	1165.9	4.32634	0.389919	11.0955	1.31922e-28	3.66515e-26	30.0815	15.9653	11.1193	337.71	488.104	318.625	4160.67	2453.11	2677.73
ENSMUSG00000049999.4	Ppp1r3d	433.998	2.37025	0.214159	11.0677	1.79991e-28	4.92919e-26	168.457	127.722	174.433	908.646	761.062	798.999	357.25	254.88	354.528
ENSMUSG00000034438.16	Gbp8	822.95	3.83947	0.34797	11.0339	2.62198e-28	7.07934e-26	23.0625	47.8959	24.3234	322.784	407.607	546.632	1897.05	1560.61	2576.58
ENSMUSG00000043391.10	RP23-245B21.4	2000.04	-1.30389	0.118959	-10.9609	5.89312e-28	1.56904e-25	3606.78	3459.91	3715.92	1514.1	1339.18	1518.1	959.917	895.89	990.592
ENSMUSG00000029502.14	Golga3	10864	1.81887	0.166253	10.9404	7.38794e-28	1.94009e-25	3620.81	3715.35	3797.92	14627	11353.7	13303.3	16878.8	13242.7	17236.3
ENSMUSG00000000247.11	Lhx2	187.884	4.6673	0.429733	10.8609	1.76926e-27	4.58333e-25	11.0299	11.4038	4.16972	215.5	246.613	148.107	413.168	357.34	283.622
ENSMUSG00000031712.10	Il15	3218.12	2.02132	0.186869	10.8168	2.86553e-27	7.32431e-25	985.672	1249.86	974.325	3995.62	4528.32	4468.55	5091.6	3668.24	4000.95
ENSMUSG00000074344.6	Tmigd3	391.617	4.00478	0.370743	10.802	3.36642e-27	8.49135e-25	55.1495	29.6499	74.3601	1060.71	564.942	1021.16	284.765	171.049	262.767
ENSMUSG00000002489.16	Tiam1	2315.33	2.20607	0.204278	10.7994	3.46582e-27	8.62855e-25	611.658	939.672	749.16	4121.56	3366.24	3083.94	2765.84	2749.48	2450.41
ENSMUSG00000049130.6	C5ar1	7628.41	-1.789	0.165917	-10.7825	4.16429e-27	1.02346e-24	12023.6	13312.8	13279.2	3556.22	3917.28	3699.76	7619.27	5520.99	5726.66
ENSMUSG00000026068.11	Il18rap	2878.44	4.43865	0.4133	10.7395	6.63876e-27	1.61095e-24	60.1631	253.164	122.312	2797.77	3713.11	2768.24	6226.51	5703.04	4261.63
ENSMUSG00000108524.1	RP23-136A14.3	1138.32	3.09692	0.288915	10.7191	8.27829e-27	1.98368e-24	196.533	198.426	276.592	2026.26	1513.34	2236.22	1674.42	873.874	1249.19
ENSMUSG00000063388.4	BC023105	523.845	7.71047	0.719698	10.7135	8.79898e-27	2.08242e-24	6.01631	2.28076	0	605.453	379.068	632.379	1489.06	460.647	1139.7
ENSMUSG00000022184.8	Fbxo4	1056.66	1.74756	0.163527	10.6866	1.17576e-26	2.74869e-24	379.027	428.783	373.19	1215.57	1487	1241.37	1463.17	1608.03	1313.84
ENSMUSG00000039982.7	Dtx4	1653.01	-2.28581	0.215606	-10.6018	2.92257e-26	6.75008e-24	4502.2	2800.77	3996.68	804.161	830.582	684.021	404.884	474.195	379.553
ENSMUSG00000050953.10	Gja1	1956.02	4.06134	0.383371	10.5938	3.18527e-26	7.26923e-24	166.451	225.795	99.3784	3189.59	2493.94	2433.05	4751.95	2153.35	2090.67
ENSMUSG00000057135.12	Scimp	443.976	3.84517	0.364951	10.5361	5.88762e-26	1.32783e-23	35.0951	25.0883	22.9335	444.994	306.62	447.245	1196.01	547.018	970.78
ENSMUSG00000046879.7	Irgm1	57810.9	3.7048	0.352865	10.4992	8.71131e-26	1.94181e-23	5140.93	7606.33	2994.56	78511.1	55908.8	70740.7	131557	68287.5	99551.3
ENSMUSG00000098871.1	Mir6381	6429.24	5.2899	0.50511	10.4728	1.15215e-25	2.53871e-23	156.424	82.1073	30.578	4173.8	2626.4	3705.6	22707.7	8703.17	15677.4
ENSMUSG00000063193.8	Cd300lb	6060.86	-3.64183	0.348	-10.4651	1.25004e-25	2.7231e-23	15938.2	14371.1	15748.3	1215.57	1257.22	1217.01	989.946	2711.38	1099.04
ENSMUSG00000078122.4	RP23-23B17.2	945.464	-3.06147	0.293027	-10.4477	1.50105e-25	3.23316e-23	1626.41	3031.13	2146.71	295.73	279.544	238.725	301.333	381.05	208.546
ENSMUSG00000029298.15	Gbp9	10755.4	3.16523	0.303448	10.4309	1.7925e-25	3.81802e-23	522.416	960.199	431.566	5123.5	6030.69	5918.44	30378.7	20157.5	27275.7
ENSMUSG00000041483.14	Zfp281	4059.13	1.97831	0.190332	10.394	2.64079e-25	5.56306e-23	1453.94	1432.32	1111.93	5335.26	5617.96	4778.41	6593.08	4708.93	5500.39
ENSMUSG00000016496.7	Cd274	25722	4.12329	0.396963	10.3871	2.83878e-25	5.91515e-23	2249.1	1012.66	1157.79	33259.8	18210.6	25602.1	71199.5	29458.5	49348.1
ENSMUSG00000022218.16	Tgm1	287.307	2.82416	0.273608	10.3219	5.60727e-25	1.15582e-22	54.1468	91.2303	75.75	538.284	496.886	501.811	217.457	364.114	246.084
ENSMUSG00000054321.6	Taf4b	565.972	2.87602	0.278715	10.3188	5.79179e-25	1.18116e-22	89.2419	132.284	86.8692	733.261	884.003	599.25	1109.03	770.567	689.243
ENSMUSG00000059089.4	Fcgr4	24043.3	2.74106	0.265767	10.3138	6.10592e-25	1.23211e-22	2950	4119.05	2397.59	20772	19204.4	23253.8	60818.5	35216.6	47657.9
ENSMUSG00000032344.17	Mb21d1	1107.44	2.23354	0.217938	10.2485	1.20202e-24	2.40029e-22	376.019	488.082	376.665	1956.29	2324.17	1520.05	1107.99	940.769	876.934
ENSMUSG00000046031.7	Fam26f	13717.6	4.6705	0.456196	10.2379	1.34076e-24	2.64974e-22	772.093	198.426	376.665	13392.7	7245.46	13779.8	38380.1	19196.4	30117.1
ENSMUSG00000078922.9	Tgtp1	1782.91	6.12934	0.599	10.2326	1.41647e-24	2.77079e-22	11.0299	4.56152	5.55963	619.447	352.723	558.325	7957.88	1573.31	4963.39
ENSMUSG00000097558.1	Gm26902	697.922	5.27984	0.517849	10.1957	2.07206e-24	4.01226e-22	9.02446	47.8959	10.4243	491.639	1077.2	767.819	1001.34	1409.88	1466.08
ENSMUSG00000090570.1	RP23-115A1.10	271.779	4.99218	0.492065	10.1454	3.47464e-24	6.66088e-22	14.0381	6.84227	15.9839	500.035	283.203	466.733	576.778	177.823	404.578
ENSMUSG00000029553.10	Tfec	5119.91	2.38715	0.2367	10.0851	6.42846e-24	1.22013e-21	1769.8	1972.86	1403.11	9538.92	9026.64	8321.29	6253.44	3853.68	3939.43
ENSMUSG00000033450.8	Tagap	5888.81	4.22777	0.419327	10.0823	6.61803e-24	1.2438e-21	326.886	403.694	375.275	7980.04	6282.42	6440.71	15495.4	3646.22	12048.7
ENSMUSG00000026596.13	Abl2	7332.58	1.86193	0.185251	10.0508	9.10794e-24	1.69514e-21	2792.57	3067.62	2720.74	11600.6	9682.32	9892.98	10009.2	6852.97	9374.12
ENSMUSG00000060183.6	Cxcl11	1147.59	6.16961	0.615538	10.0231	1.20639e-23	2.22369e-21	6.01631	6.84227	1.38991	333.979	219.537	336.164	4411.27	1366.7	3646.42
ENSMUSG00000026806.15	Ddx31	1569.82	1.85915	0.185638	10.0149	1.31078e-23	2.39311e-21	605.642	688.789	601.135	2612.12	1847.77	2400.9	1939.51	1577.55	1855.01
ENSMUSG00000020547.5	Bzw2	2590.83	2.68579	0.268765	9.99309	1.6341e-23	2.95526e-21	381.033	542.82	367.631	2857.48	2347.58	3060.56	5725.33	3141.54	4893.52
ENSMUSG00000050350.8	GRp18	1006.14	5.20894	0.521653	9.98545	1.7649e-23	3.16197e-21	44.1196	20.5268	29.1881	1404.95	613.241	1516.15	2803.12	678.268	1945.73
ENSMUSG00000000409.14	Lck	237.077	4.61119	0.462028	9.98034	1.85835e-23	3.29857e-21	7.01903	22.8076	6.25458	288.267	265.64	188.057	617.163	422.542	315.947
ENSMUSG00000040964.16	Arhgef10l	2402.06	-1.64826	0.165424	-9.9639	2.19281e-23	3.85652e-21	4454.07	3478.16	3572.06	1303.26	1296.73	1070.85	2054.45	2320.17	2068.77
ENSMUSG00000037656.9	Slc20a2	846.254	1.50853	0.151479	9.95868	2.31119e-23	3.99319e-21	437.185	431.063	474.653	1283.67	1127.69	1421.63	774.56	867.1	798.73
ENSMUSG00000039899.5	Fgl2	30553.3	3.06916	0.308191	9.95863	2.31218e-23	3.99319e-21	2267.15	3282.01	1337.79	17455.5	22880.2	17382.1	78433.6	72425.7	59515.8
ENSMUSG00000002307.15	Daxx	7362.45	2.22461	0.22354	9.95173	2.47839e-23	4.24204e-21	1959.31	2572.7	1715.15	10477.4	10347.5	8327.13	11773.7	10927.7	8161.43
ENSMUSG00000038102.15	Trappc11	4416.41	1.14756	0.115704	9.91806	3.47459e-23	5.8945e-21	2383.46	2403.92	2722.83	5496.66	5533.8	5625.15	4874.14	5294.9	5412.8
ENSMUSG00000063889.16	Crem	2104.29	2.55293	0.257432	9.91691	3.51469e-23	5.91022e-21	486.318	488.082	392.649	2933.04	2735.43	2337.56	4428.87	2716.46	2420.17
ENSMUSG00000039304.11	Tnfsf10	3907.03	3.28286	0.331125	9.91426	3.60917e-23	6.01632e-21	413.12	291.937	146.635	2690.49	3047.18	2528.54	9501.83	7152.72	9390.81
ENSMUSG00000027175.10	Tcp11l1	1845.51	1.49261	0.150816	9.8969	4.29382e-23	7.0959e-21	844.289	825.634	818.656	2670.9	2283.92	2048.17	2569.1	2264.28	2284.62
ENSMUSG00000053113.3	Socs3	12275.9	4.75147	0.480624	9.88604	4.78595e-23	7.84159e-21	733.99	317.025	608.78	19610.5	11012.7	14177.4	29031.5	7240.79	27750.1
ENSMUSG00000022035.6	Ccdc25	3450.94	2.32853	0.237434	9.80707	1.04969e-22	1.7053e-20	836.267	976.164	581.676	3840.76	4599.3	3539.96	6604.47	5286.43	4793.42
ENSMUSG00000030149.15	Klrk1	348.899	3.98626	0.406651	9.80267	1.0965e-22	1.76637e-20	20.0544	15.9653	10.4243	245.353	311.011	161.749	901.928	940.769	532.834
ENSMUSG00000050029.7	Rap2c	10339.3	2.07527	0.2118	9.79824	1.14559e-22	1.83009e-20	2761.49	3108.67	2470.56	11968.2	12109.7	11047.6	21521	13416.3	14650.3
ENSMUSG00000063506.14	Arhgap22	1261.94	-1.87083	0.191984	-9.74474	1.94274e-22	3.07787e-20	2459.67	2565.85	3207.21	696.878	818.142	736.638	252.664	351.412	269.024
ENSMUSG00000030748.9	Il4ra	41278.7	2.93919	0.302498	9.7164	2.56697e-22	4.03351e-20	9146.79	7519.66	10320.8	75960.6	47032.2	84024.5	58561.1	30145.3	48797.6
ENSMUSG00000031639.12	Tlr3	3431.79	2.67254	0.276608	9.66184	4.37909e-22	6.82498e-20	693.881	944.234	649.087	4111.3	6398.78	4031.05	4883.46	5693.73	3480.63
ENSMUSG00000014846.12	Tppp3	142.283	2.96358	0.306786	9.66008	4.455e-22	6.88729e-20	16.0435	22.8076	17.3738	118.479	150.017	152.005	220.563	291.291	291.964
ENSMUSG00000005824.6	Tnfsf14	645.254	2.68493	0.278472	9.64166	5.33174e-22	8.17676e-20	179.487	255.445	187.638	1813.56	966.696	1189.73	412.132	456.413	346.186
ENSMUSG00000097819.1	RP24-421H8.1	243.879	2.97009	0.308231	9.63591	5.63926e-22	8.57974e-20	50.1359	54.7382	32.6628	407.678	296.375	342.985	447.34	275.203	287.793
ENSMUSG00000078920.3	Ifi47	39820.4	3.79975	0.395979	9.59584	8.32333e-22	1.25636e-19	2941.97	3288.85	1238.41	39225.7	26553	38171.7	114393	49581.3	82989.7
ENSMUSG00000049502.17	Dtx3l	16909.8	2.40898	0.25139	9.58262	9.4614e-22	1.41699e-19	4082.06	5227.5	3382.34	26455.2	18340.1	22569.8	29151.6	18330.2	24649
ENSMUSG00000030718.9	Ppme1	2005.96	1.20685	0.126176	9.56476	1.12461e-21	1.65369e-19	990.685	1026.34	986.834	2353.71	2423.69	2148.53	2948.09	2655.49	2520.27
ENSMUSG00000038587.9	Akap12	294.67	3.18309	0.332811	9.56426	1.13006e-21	1.65369e-19	39.106	72.9843	43.0871	472.981	519.571	363.447	328.256	525.848	286.75
ENSMUSG00000049872.8	Fam26e	127.454	6.26209	0.654662	9.56538	1.11791e-21	1.65369e-19	3.00815	0	3.47477	234.158	137.577	248.469	243.345	105	172.05
ENSMUSG00000036875.15	Dna2	1231.73	1.86978	0.195527	9.56276	1.14654e-21	1.66509e-19	399.082	570.19	567.777	1881.66	1748.25	1975.09	1348.23	1131.29	1463.99
ENSMUSG00000052423.14	B4galt3	2578.11	2.58836	0.27075	9.55994	1.17825e-21	1.69828e-19	479.299	704.754	886.761	4148.61	3598.22	4715.07	3199.72	2170.29	3300.23
ENSMUSG00000006641.12	Slc5a6	941.405	1.97762	0.207016	9.55299	1.26009e-21	1.80268e-19	432.171	390.01	504.536	1723.07	1563.84	1962.42	512.577	764.64	619.38
ENSMUSG00000039997.16	Ifi203	22431.6	3.07209	0.32162	9.55193	1.27301e-21	1.80768e-19	3206.69	4807.84	2299.6	32294.3	26736.7	27641.5	46636.2	23036.6	35225.4
ENSMUSG00000090942.1	F830016B08Rik	1400.96	5.44292	0.570095	9.5474	1.32989e-21	1.87456e-19	16.0435	13.6845	13.2041	820.953	330.769	719.099	5310.09	1044.92	4339.83
ENSMUSG00000086593.2	RP23-202J6.3	355.825	7.12528	0.747314	9.53451	1.5059e-21	2.10716e-19	2.00544	6.84227	2.77982	594.258	183.679	625.558	910.212	206.614	670.474
ENSMUSG00000090069.2	RP23-17J18.2	1601.73	3.8009	0.399396	9.51662	1.78901e-21	2.48516e-19	132.359	141.407	120.922	2137.28	1663.36	1686.67	4116.15	1124.52	3292.93
ENSMUSG00000039753.16	Fbxl5	8251.77	2.50889	0.26382	9.50984	1.9096e-21	2.6336e-19	1973.35	1922.68	2043.86	11216.3	10913.9	11683.9	15792.5	7189.98	11529.4
ENSMUSG00000074361.10	C5ar2	277.108	-2.43802	0.256601	-9.5012	2.07494e-21	2.84118e-19	504.367	615.805	605.305	115.68	96.5964	106.208	113.906	205.767	130.341
ENSMUSG00000039384.8	Dusp10	749.603	2.47007	0.260182	9.49363	2.23132e-21	3.03364e-19	67.1821	123.161	58.3761	423.537	422.243	465.758	1777.97	1552.14	1856.06
ENSMUSG00000024349.9	Tmem173	13960	2.52823	0.266357	9.49188	2.26915e-21	3.06335e-19	2051.56	2497.43	3482.41	14642.8	12668.8	19039.6	27238	18396.2	25623
ENSMUSG00000041075.8	Fzd7	7155.95	3.24753	0.342406	9.48445	2.43655e-21	3.26633e-19	1330.61	1037.74	1245.36	14823.8	7443.04	12075.6	12301.8	5209.37	8936.18
ENSMUSG00000108126.1	RP24-238C11.4	405.284	-3.1805	0.335691	-9.47451	2.68028e-21	3.56812e-19	1251.39	727.562	847.149	127.808	57.8115	127.645	195.711	159.194	153.281
ENSMUSG00000037997.12	Parp11	2638.19	1.52905	0.161996	9.43884	3.76927e-21	4.98323e-19	811.199	1014.94	831.86	2410.62	2873.01	2356.07	4233.16	4887.6	4325.24
ENSMUSG00000087639.1	RP23-156O5.3	768.1	-1.90608	0.202119	-9.43049	4.08192e-21	5.35961e-19	1500.07	1443.72	2054.28	419.806	471.273	444.322	170.859	226.089	182.477
ENSMUSG00000022257.4	Laptm4b	1538.94	2.50931	0.266116	9.42939	4.12481e-21	5.37909e-19	354.962	285.095	399.598	1657.77	2483.7	1805.54	1801.79	3011.99	2050
ENSMUSG00000063760.9	Rnf217	1262.97	1.71741	0.182285	9.42155	4.44492e-21	5.75737e-19	437.185	348.956	398.903	1254.75	1447.48	1212.14	2451.05	1829.88	1986.4
ENSMUSG00000022864.14	D16Ertd472e	379.645	2.21669	0.235463	9.4142	4.76693e-21	6.13302e-19	145.394	145.969	136.211	653.031	713.496	615.814	429.736	245.565	331.588
ENSMUSG00000038058.14	Nod1	7982.73	3.17354	0.337615	9.39988	5.46257e-21	6.98116e-19	1410.82	823.354	1057.02	12507.4	6138.26	11083.7	16572.3	8868.3	13383.4
ENSMUSG00000090222.2	Ifi203-ps	1231.31	3.26514	0.348182	9.3777	6.74276e-21	8.56018e-19	110.299	248.603	108.413	1545.82	1613.6	1244.3	2756.52	1578.39	1875.87
ENSMUSG00000039232.12	Stx11	2936.81	3.26184	0.348989	9.34655	9.05549e-21	1.14206e-18	349.949	271.41	225.165	3225.04	2714.21	2178.73	9037.92	3553.08	4875.8
ENSMUSG00000049488.14	Tmem67	1433.57	1.63865	0.175339	9.34559	9.13784e-21	1.14492e-18	379.027	367.202	469.094	1167.99	1268.19	1369.99	2634.33	2305.77	2940.49
ENSMUSG00000003808.18	Farsa	3338.16	1.21903	0.130662	9.32966	1.06216e-20	1.32218e-18	1374.73	1587.41	1720.71	3609.4	3486.98	3807.91	4794.41	4794.45	4867.45
ENSMUSG00000027544.16	Nfatc2	1475.38	-2.77902	0.299793	-9.26978	1.86537e-20	2.30704e-18	2509.8	1895.31	2830.55	411.41	336.624	306.933	1016.87	2202.47	1768.47
ENSMUSG00000037321.17	Tap1	17784.4	2.49283	0.268988	9.26746	1.90635e-20	2.34261e-18	2412.54	3396.05	2183.54	15640.1	11172.2	18131.4	41271.2	27130.7	38721.7
ENSMUSG00000034973.16	Dopey1	2347.66	1.4256	0.15605	9.13555	6.50749e-20	7.94577e-18	1117.03	1258.98	1412.15	3499.31	3435.03	3247.64	2638.48	2094.93	2425.39
ENSMUSG00000115902.1	RP23-373B5.4	893.046	1.9087	0.208953	9.13458	6.56585e-20	7.96629e-18	350.951	326.148	268.252	1404.95	950.596	1184.86	1212.58	1053.39	1285.68
ENSMUSG00000097461.1	Gm26735	88.8977	-3.82803	0.419968	-9.11507	7.86171e-20	9.47856e-18	303.824	159.653	259.913	17.7251	20.4901	12.6671	8.28407	14.3952	3.12818
ENSMUSG00000042726.14	Trafd1	19389.1	1.41355	0.155119	9.11271	8.03529e-20	9.62729e-18	7162.41	7129.65	6742.44	20835.4	16067.2	19128.2	35996.4	28978.4	32462.2
ENSMUSG00000028894.18	Inpp5b	9802.25	2.2833	0.250604	9.11118	8.14892e-20	9.70278e-18	1597.33	2408.48	1780.47	10183.6	7910.66	10037.2	22123.6	13205.5	18973.5
ENSMUSG00000091549.1	RP24-298J16.4	1727.32	1.70038	0.186821	9.10166	8.89632e-20	1.05273e-17	706.916	887.215	618.509	2718.48	2120.73	2314.17	2206.67	2044.12	1929.05
ENSMUSG00000047098.18	Rnf31	3241.41	1.43469	0.157973	9.0819	1.06699e-19	1.25486e-17	1279.47	1758.46	1430.91	4006.81	3769.45	4269.77	4043.66	4428.64	4185.51
ENSMUSG00000031824.15	AC163442.1	1561.11	-1.51688	0.167691	-9.04571	1.48694e-19	1.73808e-17	2934.96	2520.24	2782.59	1046.72	974.013	859.411	867.756	920.447	1143.87
ENSMUSG00000063286.7	RP23-465M17.1	39525.6	2.58362	0.286258	9.02551	1.78866e-19	2.07809e-17	7248.65	9811.82	5401.88	50939.2	40493.6	43167.4	85448.1	46324.6	66895.2
ENSMUSG00000001053.15	N4bp3	172.471	-3.04135	0.338947	-8.97294	2.88709e-19	3.33407e-17	458.242	232.637	384.309	46.6451	30.0034	55.5402	117.012	92.2987	135.555
ENSMUSG00000020893.17	Per1	654.919	-1.53387	0.171205	-8.95926	3.2686e-19	3.75204e-17	898.435	871.25	1131.38	358.234	294.18	353.703	646.157	671.494	669.431
ENSMUSG00000090272.8	Mndal	14881.5	2.53274	0.28298	8.95022	3.54777e-19	4.04826e-17	2699.32	3731.32	1937.53	17114.1	14657	16600.7	30711.1	18137.1	28345.5
ENSMUSG00000004043.14	Stat5a	2488.47	1.33404	0.149281	8.93644	4.01905e-19	4.55888e-17	1192.23	1350.21	1382.96	3481.59	2872.28	3540.93	2745.13	2744.4	3086.47
ENSMUSG00000032508.8	Myd88	9537.18	2.00152	0.225104	8.89154	6.02694e-19	6.79626e-17	3048.26	2741.47	2623.45	13153	9655.98	10881	18444.5	10995.4	14291.6
ENSMUSG00000076431.4	Sox4	133.9	-3.83385	0.431491	-8.88512	6.38501e-19	7.15793e-17	502.362	218.953	366.241	24.2554	31.467	20.4622	10.3551	23.7098	7.2991
ENSMUSG00000055485.6	Soga1	1188.66	-1.67637	0.188706	-8.88348	6.47988e-19	7.22205e-17	1754.76	2100.58	1836.76	662.36	581.774	534.94	918.496	1298.96	1009.36
ENSMUSG00000037826.5	Ppm1k	1524.06	1.96735	0.221601	8.8779	6.81324e-19	7.5497e-17	492.335	738.966	710.938	2090.63	3006.93	2480.8	1308.88	1330.29	1556.79
ENSMUSG00000013150.15	Gfod2	167.378	2.07589	0.235598	8.81116	1.23862e-18	1.36462e-16	58.1576	93.5111	78.5298	291.998	349.796	307.907	94.2313	122.783	109.486
ENSMUSG00000085977.1	AC102225.3	518.157	5.1428	0.58418	8.80346	1.32662e-18	1.45322e-16	15.0408	4.56152	8.33945	511.23	212.219	315.702	2008.89	475.889	1111.55
ENSMUSG00000036381.13	P2ry14	2507.22	1.86524	0.211983	8.79904	1.37996e-18	1.50306e-16	769.085	1030.9	815.876	2442.34	3549.19	3510.73	3137.59	3894.33	3414.93
ENSMUSG00000032531.15	Amotl2	122.702	3.89011	0.444062	8.76029	1.94754e-18	2.10929e-16	24.0652	18.2461	13.8991	290.132	390.776	145.184	90.0893	78.7503	53.1791
ENSMUSG00000061981.14	Flot2	5949.18	1.17293	0.133906	8.75936	1.9636e-18	2.11473e-16	2495.76	2955.86	2523.38	5588.08	6137.53	6228.3	9029.64	8662.53	9921.56
ENSMUSG00000034422.14	Parp14	61340	2.22309	0.254345	8.74045	2.32188e-18	2.48662e-16	14497.3	17509.4	10796.1	80425.4	55085.5	64296.1	125580	81858.8	102011
ENSMUSG00000045210.8	Vcpip1	8285.18	1.129	0.12925	8.73503	2.43596e-18	2.59429e-16	4651.61	4921.88	5090.54	10922.4	10777.1	10372.4	10468	8505.87	8856.93
ENSMUSG00000000686.11	Abhd15	431.457	-2.80791	0.323139	-8.68947	3.64136e-18	3.85662e-16	877.378	741.246	1333.62	139.002	147.822	135.44	102.515	227.783	178.306
ENSMUSG00000053716.9	Dusp7	1189.82	-2.39681	0.276447	-8.67004	4.31957e-18	4.54979e-16	2966.04	1810.92	2061.23	470.182	323.452	506.683	659.619	1018.67	891.532
ENSMUSG00000022687.12	Boc	53.2749	3.98383	0.45993	8.66182	4.64283e-18	4.86355e-16	9.02446	6.84227	6.25458	104.485	122.941	121.799	34.1718	22.863	51.0937
ENSMUSG00000045502.6	Hcar2	3194.26	4.86757	0.564413	8.62414	6.45782e-18	6.72807e-16	162.44	50.1767	66.7156	3853.82	1402.11	2958.25	11194.9	2533.56	6526.43
ENSMUSG00000070476.10	Fam217b	658.723	1.62488	0.1887	8.61091	7.2483e-18	7.5108e-16	392.063	355.798	432.956	1268.75	1099.88	1291.07	315.83	331.09	441.074
ENSMUSG00000063268.12	Parp10	6122.24	1.80827	0.210531	8.58911	8.76446e-18	9.03305e-16	1787.85	2568.13	1544.88	7314.88	6366.58	6935.7	9482.15	10299.3	8800.62
ENSMUSG00000020700.11	Map3k3	9763.91	1.53892	0.17969	8.56431	1.08723e-17	1.11455e-15	4917.33	4655.03	5107.91	16382.7	11722.6	14563.2	11344	8694.71	10487.8
ENSMUSG00000059142.15	Zfp945	1684.44	2.13507	0.249601	8.55391	1.18984e-17	1.21326e-15	528.432	494.924	694.259	2420.88	2324.17	2822.81	2358.89	1358.23	2157.4
ENSMUSG00000066800.11	Rnasel	10898.2	1.43167	0.168	8.52181	1.57082e-17	1.59326e-15	7827.22	7318.95	7405.43	22131.2	20119.9	18587.5	4850.32	5777.56	4065.6
ENSMUSG00000050244.9	Heatr1	4836.27	1.16785	0.137142	8.51567	1.65636e-17	1.67118e-15	2942.98	3058.5	3042.51	7409.1	6202.66	6706.72	5185.83	4739.41	4238.69
ENSMUSG00000052713.8	Zfp608	507.519	1.6083	0.189173	8.50173	1.8678e-17	1.87465e-15	333.905	319.306	270.337	1009.4	968.159	828.231	329.292	265.041	243.998
ENSMUSG00000023961.16	Enpp4	1358.66	2.68953	0.316381	8.50094	1.88069e-17	1.87775e-15	283.769	132.284	178.603	1473.05	1130.62	1264.76	3369.55	1837.51	2557.81
ENSMUSG00000020653.12	Klf11	131.631	-1.84252	0.217316	-8.47854	2.28032e-17	2.26496e-15	308.837	257.726	277.982	72.7663	71.7155	92.567	37.2783	35.5646	30.2391
ENSMUSG00000035352.3	Ccl12	2575.36	4.89277	0.578749	8.45406	2.81356e-17	2.7802e-15	81.2202	228.076	21.5436	2841.62	4237.07	2554.85	5100.92	4337.19	3775.72
ENSMUSG00000030275.6	Etnk1	11037.1	1.37226	0.162596	8.43965	3.18301e-17	3.12914e-15	4418.98	5649.44	5049.53	11986.9	15015.6	12111.7	14487.8	16130.3	14483.5
ENSMUSG00000039531.8	Zufsp	3223.96	1.64338	0.194868	8.43333	3.35968e-17	3.28598e-15	1175.19	1388.98	1195.32	3691.49	4156.57	3879.04	5429.17	3487.87	4611.99
ENSMUSG00000022246.14	Rai14	2455.75	1.91593	0.227901	8.40684	4.21204e-17	4.09872e-15	717.946	1117.57	666.461	3463.86	2868.62	3060.56	3813.78	3334.61	3058.32
ENSMUSG00000030256.11	Bhlhe41	1770.72	-2.90864	0.346527	-8.3937	4.71071e-17	4.56082e-15	4975.49	2695.86	4156.52	662.36	280.276	634.328	897.786	707.906	925.942
ENSMUSG00000021758.14	Ddx4	127.587	2.88937	0.346212	8.34568	7.08061e-17	6.82087e-15	16.0435	2.28076	22.2385	120.344	117.818	114.978	274.41	259.114	221.058
ENSMUSG00000022094.15	Slc39a14	1134.68	1.19742	0.143846	8.32432	8.48154e-17	8.12955e-15	684.856	741.246	779.738	1837.82	1508.95	1714.93	1041.72	919.6	983.292
ENSMUSG00000012428.9	Steap4	185.86	6.46828	0.777181	8.32275	8.59431e-17	8.19667e-15	1.00272	2.28076	4.16972	242.554	296.375	167.595	278.552	584.276	95.931
ENSMUSG00000071350.12	Setdb2	2189.65	2.09442	0.251703	8.32099	8.72284e-17	8.27806e-15	659.788	882.653	556.658	2820.16	3765.06	2341.46	3376.79	2658.88	2645.4
ENSMUSG00000027087.11	Itgav	18509.2	1.79351	0.218646	8.20277	2.34913e-16	2.21836e-14	4803.02	8096.69	7324.81	20234.6	24892.6	24959	23854	25597.2	26821
ENSMUSG00000020709.15	Adap2	2479.63	-1.25982	0.153651	-8.19921	2.41963e-16	2.27374e-14	3103.41	2481.46	3200.26	1309.79	1118.18	1247.22	3367.47	3393.04	3095.86
ENSMUSG00000028381.8	Ugcg	3679.86	2.14876	0.262297	8.1921	2.56701e-16	2.40047e-14	1149.11	1375.3	1409.37	6216.86	5274.75	5949.62	5535.83	2755.41	3452.47
ENSMUSG00000034320.14	Slc26a2	7097.88	1.7827	0.217785	8.18559	2.70973e-16	2.52163e-14	2787.56	2616.03	3313.54	11934.6	7438.65	10638.4	9305.08	7323.77	8523.26
ENSMUSG00000027199.14	Gatm	5690.14	1.50363	0.183817	8.18001	2.83816e-16	2.62839e-14	1980.37	2517.96	1822.17	6083.45	6242.91	5561.81	10293	7737	8972.67
ENSMUSG00000047511.6	Olfr1396	86.21	3.91785	0.479711	8.16711	3.15864e-16	2.91111e-14	4.01087	11.4038	5.55963	81.1624	126.6	68.2073	136.687	156.654	185.606
ENSMUSG00000073902.5	RP23-465M17.2	2093.6	2.37157	0.29143	8.1377	4.02845e-16	3.695e-14	307.834	474.398	248.793	1437.6	2394.42	1455.74	4281.83	4379.53	3862.26
ENSMUSG00000049225.14	Pdp1	1362.31	-1.84761	0.227743	-8.11268	4.95165e-16	4.52015e-14	2566.96	2326.37	1713.76	613.849	723.741	495.964	1477.67	1182.95	1159.51
ENSMUSG00000038679.16	Trps1	4011.83	1.5801	0.194874	8.10832	5.1324e-16	4.66295e-14	1769.8	1648.99	1929.19	5411.76	5132.05	5459.5	5677.69	3669.93	5407.59
ENSMUSG00000005686.17	Ampd3	1541.83	-1.64003	0.202282	-8.10761	5.16235e-16	4.66803e-14	3078.34	2552.17	3242.65	1021.53	854	974.389	828.407	551.252	773.704
ENSMUSG00000020346.16	Mgat1	10117.3	1.11216	0.137224	8.10465	5.28969e-16	4.76072e-14	6608.91	5731.54	7056.56	13705.3	12922.7	15331	9635.41	10186.7	9877.76
ENSMUSG00000037533.19	Rapgef6	11239.4	2.22146	0.274575	8.09053	5.94079e-16	5.32173e-14	3346.07	3094.99	3225.28	18542.4	11942.8	14600.3	20480.3	10116.4	15805.7
ENSMUSG00000030341.17	Tnfrsf1a	19964	2.06861	0.256893	8.05243	8.11685e-16	7.23721e-14	5951.13	5409.96	6513.11	27211.8	17530.8	30250.9	34026.8	21592.8	31189
ENSMUSG00000015947.10	Fcgr1	29847.4	1.78583	0.22199	8.04462	8.65144e-16	7.67815e-14	8722.64	11392.4	7110.77	32274.7	26851.6	34715.5	54578.6	41314.2	51666.1
ENSMUSG00000046908.5	Ltb4r1	164.324	3.38044	0.420374	8.0415	8.87452e-16	7.83984e-14	25.0679	13.6845	16.6789	156.727	272.226	161.749	207.102	409.84	215.845
ENSMUSG00000037754.13	Ppp1r16b	116.402	5.16363	0.64446	8.01233	1.12553e-15	9.89743e-14	2.00544	2.28076	2.77982	70.9005	86.3513	103.285	211.244	200.686	368.083
ENSMUSG00000028128.13	F3	186.691	7.43014	0.929317	7.99527	1.2929e-15	1.13173e-13	2.00544	2.28076	0.694954	300.394	250.272	200.724	584.027	77.0567	262.767
ENSMUSG00000074151.13	Nlrc5	11474.5	2.07605	0.25999	7.98509	1.40416e-15	1.22353e-13	2144.81	2789.37	2042.47	12107.2	7642.09	9643.53	27120	16289.4	23491.6
ENSMUSG00000043017.9	Ptgir	311.158	-2.29622	0.287657	-7.98249	1.43405e-15	1.24392e-13	454.231	659.139	465.619	78.3637	144.163	96.4646	258.877	364.114	279.451
ENSMUSG00000019944.14	Rhobtb1	177.349	-1.75168	0.219844	-7.96781	1.61511e-15	1.38841e-13	419.136	310.183	330.798	125.009	99.5235	91.5926	76.6276	70.2825	72.991
ENSMUSG00000037400.17	Atp11b	7461.77	1.25926	0.158035	7.96822	1.60972e-15	1.38841e-13	2764.49	3056.22	3360.8	6796.19	7902.61	7282.59	13744.3	10769.3	11479.4
ENSMUSG00000070407.5	Hs3st3b1	402.89	3.91002	0.490805	7.96655	1.63162e-15	1.39634e-13	26.0707	68.4227	63.2408	780.839	504.936	1062.08	464.943	154.96	500.509
ENSMUSG00000108332.1	RP23-89C10.2	192.359	2.53666	0.31905	7.95067	1.85512e-15	1.58056e-13	51.1386	15.9653	54.9013	260.28	213.683	283.547	315.83	275.203	260.682
ENSMUSG00000002814.15	Top3a	1903.46	1.37412	0.173156	7.93574	2.09239e-15	1.77483e-13	951.579	1033.18	1013.94	2733.4	2763.97	2270.33	2459.33	2129.64	1775.77
ENSMUSG00000040328.15	Olfr56	5253.54	3.45222	0.435099	7.93433	2.11641e-15	1.78729e-13	308.837	634.051	125.787	4054.39	3903.37	3644.22	12258.4	11504.3	10848.5
ENSMUSG00000017715.11	Pgs1	7297.21	1.76188	0.222528	7.91756	2.42219e-15	2.03656e-13	2183.92	2111.98	2651.25	8592.02	6780.77	8203.38	14128.5	8626.12	12397
ENSMUSG00000071652.7	Ints5_1	1715.27	1.2068	0.15262	7.90723	2.6317e-15	2.20304e-13	1018.76	1149.5	974.325	2699.82	2272.94	2262.53	1762.44	1514.04	1783.06
ENSMUSG00000034610.14	Zcchc11	1316.56	-0.931632	0.117937	-7.89943	2.8019e-15	2.33532e-13	1850.01	2011.63	2067.49	1047.65	1058.17	1001.67	910.212	904.358	997.891
ENSMUSG00000040111.16	Gramd1b	3549.43	-1.56378	0.198217	-7.88923	3.0406e-15	2.5233e-13	6170.73	6050.85	8313.73	2230.57	2493.21	2224.53	1218.79	1709.64	1532.81
ENSMUSG00000025491.14	Ifitm1	743.85	3.41117	0.432908	7.87965	3.28295e-15	2.71268e-13	74.2011	29.6499	133.431	903.982	754.476	937.363	1823.53	876.414	1161.6
ENSMUSG00000098292.1	RP23-59B16.8	168.624	2.44079	0.310357	7.86447	3.70658e-15	3.04957e-13	50.1359	63.8612	31.2729	285.468	260.517	209.494	251.629	201.533	163.708
ENSMUSG00000027204.13	Fbn1	298.278	2.44739	0.311243	7.86326	3.74261e-15	3.06606e-13	53.1441	31.9306	38.2225	228.561	284.667	171.493	516.719	788.349	571.415
ENSMUSG00000017652.16	Cd40	10418.7	3.3622	0.42824	7.85121	4.12045e-15	3.36123e-13	723.962	444.748	408.633	7034.08	3318.67	5877.52	39700.4	12374	23886.8
ENSMUSG00000050549.8	RP23-173N16.6	1915.52	2.57126	0.328077	7.83736	4.60124e-15	3.73753e-13	465.261	428.783	287.016	2538.43	2285.38	2180.68	4592.48	1934.04	2527.57
ENSMUSG00000029156.11	Sgcb	3839.64	1.17387	0.150197	7.81548	5.47522e-15	4.42869e-13	1379.74	1765.31	1510.13	3321.13	3523.57	3633.5	6646.93	5813.12	6963.34
ENSMUSG00000002289.15	Angptl4	79.0182	-4.27045	0.546821	-7.80959	5.73766e-15	4.62146e-13	350.951	125.442	183.468	17.7251	8.0497	8.7695	7.24856	8.46777	1.04273
ENSMUSG00000020572.8	Mampt	52654.6	2.24752	0.289391	7.76637	8.07698e-15	6.47848e-13	10342	11424.3	7107.99	51462.6	42717.6	42909.2	144720	71773.7	91434.7
ENSMUSG00000039911.13	Spsb1	240.318	2.69706	0.347936	7.75161	9.07373e-15	7.24764e-13	71.193	45.6152	51.4266	333.979	505.667	262.111	332.398	358.187	202.289
ENSMUSG00000090081.1	RP23-202J6.2	137.119	6.83205	0.883042	7.73695	1.01828e-14	8.09974e-13	2.00544	2.28076	0.694954	223.896	82.6924	186.108	389.351	113.468	233.571
ENSMUSG00000022790.14	Igsf11	289.221	3.69856	0.478361	7.73174	1.06084e-14	8.40343e-13	5.01359	43.3344	24.3234	295.73	291.253	294.266	413.168	733.309	502.595
ENSMUSG00000116639.1	RP23-78C2.6	703.174	2.18435	0.282555	7.73069	1.06963e-14	8.43818e-13	135.367	248.603	135.516	982.345	664.466	669.406	1285.07	1102.5	1105.29
ENSMUSG00000086507.1	Adap2os	512.332	-1.24191	0.16129	-7.69984	1.36237e-14	1.07035e-12	575.56	526.855	678.97	264.011	237.832	256.264	686.542	729.075	655.876
ENSMUSG00000048490.14	Nrip1	2349.54	1.35578	0.176148	7.69683	1.39483e-14	1.09138e-12	1186.22	1144.94	1291.92	3415.35	2770.56	3097.58	3083.74	2238.03	2917.55
ENSMUSG00000025997.13	Ikzf2	424.372	2.26017	0.293884	7.69068	1.4636e-14	1.14053e-12	77.2093	84.388	88.9541	436.598	294.912	470.63	923.674	536.857	906.131
ENSMUSG00000023106.15	Denr	3204.99	1.48535	0.193635	7.67087	1.70832e-14	1.32585e-12	1216.3	1172.31	890.236	3254.89	2952.04	2958.25	6564.09	4903.69	4933.15
ENSMUSG00000072673.2	Gm10392	186.498	-3.29544	0.429734	-7.66857	1.73924e-14	1.34441e-12	387.049	360.36	623.374	41.0477	45.371	53.5914	20.7102	81.2906	65.6919
ENSMUSG00000031792.15	Usb1	2792.11	1.34437	0.175335	7.66746	1.75432e-14	1.35062e-12	1293.51	1352.49	1093.16	3133.62	3462.1	2881.27	4050.91	4511.63	3350.29
ENSMUSG00000024778.12	Fas	2914.17	2.6013	0.33981	7.65516	1.93076e-14	1.48051e-12	567.538	346.675	538.589	3008.61	2281.72	3554.57	7295.16	3042.47	5592.15
ENSMUSG00000090246.1	AC147806.8	555.1	1.41463	0.185387	7.63069	2.33504e-14	1.78338e-12	256.696	209.83	202.232	563.473	665.198	556.376	907.106	896.737	738.251
ENSMUSG00000041763.14	Tpp2	8474.78	1.04591	0.137106	7.62849	2.37518e-14	1.80683e-12	4962.45	5790.84	4981.43	11042.8	11301	10120	10280.5	8611.72	9182.26
ENSMUSG00000023094.14	Msrb2	585.533	1.68263	0.220589	7.62787	2.3867e-14	1.80842e-12	222.603	291.937	322.459	779.906	890.589	1016.29	479.441	663.873	602.697
ENSMUSG00000047293.7	Gpr15	59.954	5.88207	0.77239	7.61541	2.62851e-14	1.9838e-12	1.00272	2.28076	2.08486	76.4979	144.163	85.7463	70.4146	108.387	49.0082
ENSMUSG00000010142.12	Tnfrsf13b	1892.84	0.916387	0.121098	7.56729	3.81083e-14	2.86484e-12	1424.86	1277.22	1335.7	2586	2334.41	2712.7	1825.6	1743.51	1795.58
ENSMUSG00000056144.14	Trim34a	1326.1	1.29358	0.171244	7.55402	4.22037e-14	3.16033e-12	647.756	873.53	604.61	1654.03	1814.84	1704.21	1549.12	1508.11	1578.69
ENSMUSG00000054364.5	Rhob	1630.99	-2.62136	0.347932	-7.53412	4.9165e-14	3.66729e-12	4707.76	2159.88	3220.42	738.858	346.869	555.402	1192.91	816.293	940.541
ENSMUSG00000019916.14	P4ha1	4701.43	1.00382	0.133407	7.52453	5.29099e-14	3.93133e-12	2641.16	2330.93	2900.74	5281.16	5124.73	5408.84	6477.11	6410.1	5738.13
ENSMUSG00000032515.8	Csrnp1	3570.43	3.34064	0.444194	7.52069	5.44878e-14	4.03294e-12	246.669	305.622	280.066	3698.95	2163.17	2561.67	11273.6	2583.52	9020.64
ENSMUSG00000020919.11	Stat5b	4677.42	1.33334	0.17738	7.51684	5.61147e-14	4.13738e-12	2546.9	2098.3	2780.51	7202	5220.6	6315.99	5435.39	5195.82	5301.23
ENSMUSG00000066677.12	Ifi208	1293.38	3.14857	0.419037	7.51384	5.74195e-14	4.21736e-12	227.617	212.11	65.3257	1642.84	1738.73	1061.11	2522.5	2531.02	1639.17
ENSMUSG00000082116.1	RP23-54N20.5	58.8726	4.9674	0.661238	7.51228	5.81062e-14	4.25151e-12	2.00544	4.56152	1.38991	69.9676	60.0068	70.156	112.87	79.597	129.298
ENSMUSG00000032035.15	Ets1	150.711	-2.56623	0.343155	-7.47836	7.52584e-14	5.48556e-12	297.807	460.713	243.929	55.9741	69.5201	41.8987	63.166	79.597	43.7946
ENSMUSG00000061878.15	Sphk1	71.9585	4.52181	0.607633	7.44168	9.94142e-14	7.21883e-12	3.00815	9.12303	6.25458	205.238	101.719	86.7207	109.764	87.218	38.5809
ENSMUSG00000097125.1	Gm26885	2136.59	2.38236	0.320366	7.43637	1.03491e-13	7.45838e-12	469.272	332.991	316.899	2560.81	1433.58	1847.44	5291.45	2636.02	4340.88
ENSMUSG00000104955.1	RP24-142B15.2	347.1	9.61333	1.29269	7.4367	1.03234e-13	7.45838e-12	0	0	0.694954	460.853	115.623	395.602	1098.67	232.864	819.584
ENSMUSG00000020889.11	Nr1d1	134.393	-2.84724	0.384402	-7.40693	1.29253e-13	9.28005e-12	408.106	212.11	296.745	41.9806	36.5895	49.6939	38.3138	86.3712	39.6237
ENSMUSG00000041449.16	Serpina3h	255.452	5.79182	0.78209	7.40557	1.30591e-13	9.34118e-12	0	4.56152	1.38991	63.4373	75.3744	96.4646	876.04	502.986	678.816
ENSMUSG00000021453.2	Gadd45g	360.679	2.2875	0.309468	7.39171	1.4495e-13	1.03297e-11	202.549	111.757	82.6995	668.89	653.489	619.712	296.155	338.711	272.152
ENSMUSG00000026107.11	Nabp1	1753.24	1.63232	0.220862	7.39068	1.46076e-13	1.03714e-11	676.835	1053.71	740.126	2318.26	2766.17	2541.21	2204.6	1578.39	1899.85
ENSMUSG00000066258.13	Trim12a	1694.11	0.9969	0.13494	7.38773	1.49358e-13	1.05653e-11	922.501	1117.57	923.594	1949.76	1861.68	2077.4	2213.92	2062.75	2117.78
ENSMUSG00000028793.15	Rnf19b	20393.5	2.18085	0.29533	7.38445	1.53082e-13	1.07889e-11	4238.49	2734.63	3295.47	19004.1	11586.4	15987.8	55162.6	28946.2	42586.1
ENSMUSG00000008734.9	Gprc5b	244.834	-1.33743	0.182072	-7.34562	2.04808e-13	1.43816e-11	424.15	490.363	388.479	161.392	190.997	158.825	125.297	138.871	125.127
ENSMUSG00000035385.5	Ccl2	4749.65	4.20237	0.57308	7.33294	2.25153e-13	1.57525e-11	267.726	786.862	89.649	6584.42	9414.49	4942.1	8458.03	6752.2	5451.38
ENSMUSG00000041515.10	Irf8	37129	1.91494	0.261237	7.33029	2.29648e-13	1.60086e-11	11200.4	6858.24	9210.92	41134.4	27284.1	34439.8	84535.8	54394.4	65102.7
ENSMUSG00000111737.1	RP24-125B17.2	596.498	1.39469	0.190986	7.30258	2.82292e-13	1.9607e-11	259.704	362.641	290.491	697.81	846.682	832.129	650.299	643.55	785.174
ENSMUSG00000054404.13	Slfn5	61280.7	2.52771	0.346453	7.29596	2.96547e-13	2.05228e-11	13258.9	19028.4	7139.26	93118.5	69463	64725.8	122333	78653.7	83806.1
ENSMUSG00000018143.10	Mafk	3136.92	1.80385	0.247337	7.29307	3.02969e-13	2.08918e-11	1500.07	1133.54	1166.13	5609.54	3396.97	4269.77	4510.68	3058.56	3586.98
ENSMUSG00000027950.7	Chrnb2	2115.54	1.13745	0.156122	7.28569	3.20029e-13	2.19891e-11	983.666	1238.45	1014.63	2615.86	2119.27	2361.92	3012.29	2737.63	2956.13
ENSMUSG00000024472.9	Dcp2	4476.79	1.355	0.18646	7.26698	3.67603e-13	2.51677e-11	2131.78	2559.01	2184.93	5744.81	7031.78	4793.02	5488.2	5591.27	4766.31
ENSMUSG00000078616.2	Trim30c	1219.7	3.10191	0.42719	7.2612	3.83667e-13	2.6174e-11	240.652	328.429	104.243	2058.91	2520.29	1152.7	1731.37	1814.64	1026.04
ENSMUSG00000041235.12	Chd7	2318.03	1.88003	0.259491	7.24508	4.32187e-13	2.93795e-11	858.327	725.281	906.22	3703.62	2401.74	3074.2	3752.68	2134.72	3305.45
ENSMUSG00000031555.15	Adam9	20618.5	1.1293	0.156146	7.23232	4.74818e-13	3.21634e-11	9409.51	11292	12568.9	23785.3	22627	26370.9	27251.5	24642.9	27618.7
ENSMUSG00000039693.11	Msantd3	123.679	2.429	0.336309	7.22253	5.10288e-13	3.44445e-11	30.0815	45.6152	25.7133	136.204	235.637	147.133	148.078	191.372	153.281
ENSMUSG00000027296.7	Itpka	64.4808	3.89923	0.540093	7.21955	5.21585e-13	3.50834e-11	4.01087	4.56152	4.16972	58.7728	48.2982	80.8743	149.113	89.7584	140.768
ENSMUSG00000108112.1	RP24-491O6.1	2774.23	1.68864	0.234125	7.21256	5.4911e-13	3.68057e-11	662.797	764.054	451.72	1978.68	2357.1	1689.59	6345.6	5239.01	5479.54
ENSMUSG00000020823.16	Sec14l1	5212.68	-1.64272	0.227926	-7.20724	5.70959e-13	3.81369e-11	9455.63	8379.5	12287.5	2843.48	3358.19	3447.39	1815.25	2852.79	2474.39
ENSMUSG00000040167.16	Ikzf5	883.487	1.57421	0.218479	7.20531	5.79128e-13	3.85482e-11	438.188	419.659	482.298	1255.69	1560.18	1181.93	1011.69	652.865	948.882
ENSMUSG00000020826.8	Nos2	1371.53	6.68115	0.931265	7.17427	7.2694e-13	4.82195e-11	3.00815	0	0	148.331	82.6924	95.4902	6084.65	2074.6	3854.97
ENSMUSG00000024777.9	Ppp2r5b	1177.69	0.906263	0.126439	7.16756	7.63443e-13	5.04662e-11	671.821	743.527	710.243	1360.17	1213.31	1403.12	1492.17	1452.22	1552.62
ENSMUSG00000071722.4	Spin4	54.6862	2.68663	0.375229	7.15998	8.06871e-13	5.31537e-11	11.0299	15.9653	16.6789	82.0953	109.769	87.695	67.3081	60.9679	40.6664
ENSMUSG00000050394.14	Armcx6	332.515	3.5368	0.494877	7.14681	8.88157e-13	5.83081e-11	24.0652	59.2997	17.3738	320.918	528.353	253.341	595.417	865.406	328.459
ENSMUSG00000036249.16	Rbm43	1766.39	1.01324	0.142031	7.13395	9.75311e-13	6.38113e-11	965.617	1124.41	1060.5	1943.23	2162.44	2242.07	1967.47	2085.61	2346.14
ENSMUSG00000060519.11	Tor3a	12589.5	1.53152	0.214955	7.12483	1.04208e-12	6.79475e-11	5742.57	5993.83	3736.07	15787.5	14488	14428.8	19976	17919.5	15233.2
ENSMUSG00000096727.2	Psmb9	3785.66	1.61023	0.226159	7.11993	1.07981e-12	7.01695e-11	1118.03	1530.39	918.034	3582.34	3093.28	4178.18	6897.52	5819.05	6934.14
ENSMUSG00000026317.7	Cln8	5589.18	-1.68043	0.236475	-7.10615	1.19327e-12	7.728e-11	11717.8	7743.17	9791.9	3675.63	2414.91	3039.12	3916.29	4646.27	3357.58
ENSMUSG00000041849.7	Card6	887.109	2.58413	0.365782	7.06467	1.60994e-12	1.03915e-10	308.837	120.88	422.532	2046.79	1479.68	1636.97	682.4	602.905	682.987
ENSMUSG00000023008.18	Fmnl3	5151.4	1.35886	0.192953	7.04243	1.88918e-12	1.21529e-10	2301.24	2572.7	2972.32	6892.28	5695.53	7543.72	6246.19	5145.02	6993.58
ENSMUSG00000059970.7	Hspa2	1030.91	1.67993	0.238601	7.04076	1.9119e-12	1.22579e-10	435.18	234.918	346.782	1288.34	956.45	1042.6	1776.93	1599.56	1597.46
ENSMUSG00000107802.1	RP24-266J20.3	507.01	1.33686	0.18995	7.03795	1.9509e-12	1.24662e-10	204.554	260.006	253.658	553.211	717.155	534.94	650.299	696.897	692.371
ENSMUSG00000022906.15	Parp9	14307.7	2.03033	0.288602	7.03503	1.99212e-12	1.26874e-10	3765.21	6326.82	2918.11	18967.8	16253.8	17878.1	24429.7	16878.8	21350.9
ENSMUSG00000034872.6	Gipc3	80.5895	2.8365	0.405575	6.99378	2.67578e-12	1.6985e-10	7.01903	9.12303	9.72935	74.6321	67.3247	42.8731	161.539	182.057	171.007
ENSMUSG00000026627.7	Tmem206	1776.8	-1.11699	0.159844	-6.98801	2.7881e-12	1.76395e-10	2592.03	2077.77	2465.7	1169.86	965.232	1160.5	2019.24	1821.42	1719.46
ENSMUSG00000031948.14	Kars	3872.82	0.90288	0.129225	6.98687	2.81092e-12	1.77254e-10	1893.13	2255.67	1881.93	3538.5	3926.06	3784.53	6015.27	5607.36	5952.93
ENSMUSG00000031216.13	Stard8	3190.39	-1.34499	0.192532	-6.98579	2.83265e-12	1.78039e-10	4980.5	4278.7	5777.85	1939.5	1909.24	2074.48	2066.88	2999.28	2687.11
ENSMUSG00000078606.8	RP23-454A11.1	489.117	2.52871	0.362013	6.98514	2.84573e-12	1.78277e-10	92.2501	123.161	43.7821	584.929	394.435	477.451	1001.34	650.325	1034.39
ENSMUSG00000069892.9	9930111J21Rik2	2453.52	1.37909	0.197483	6.9833	2.88321e-12	1.80036e-10	1312.56	1370.74	1066.75	3777.32	2827.64	3134.61	3293.95	2410.77	2887.31
ENSMUSG00000025034.8	Trim8	2548.29	-1.50694	0.216023	-6.97583	3.04076e-12	1.89257e-10	4088.08	3377.8	3672.14	1287.4	1113.79	1520.05	1988.18	3095.82	2791.38
ENSMUSG00000056121.15	Fez2	2564.13	1.07911	0.15483	6.96968	3.17656e-12	1.9707e-10	1689.58	1343.37	1362.8	3280.08	2961.56	3055.69	3255.64	3332.91	2795.55
ENSMUSG00000036412.5	Arsi	56.8851	3.72592	0.534869	6.96604	3.25981e-12	2.01582e-10	10.0272	6.84227	3.47477	126.875	59.275	73.0792	77.6632	97.3793	57.35
ENSMUSG00000054203.7	Ifi205	2098.5	3.7713	0.542377	6.95328	3.56885e-12	2.19984e-10	194.527	102.634	31.2729	1676.42	1666.29	1132.24	7282.73	4227.96	2572.41
ENSMUSG00000071042.11	Rasgrp3	2983.01	-1.47748	0.212543	-6.95143	3.61593e-12	2.22171e-10	5782.67	5352.94	7053.78	2241.76	2132.44	2160.22	587.133	616.454	919.686
ENSMUSG00000018654.17	Ikzf1	10303.3	1.92025	0.276515	6.94446	3.79906e-12	2.32667e-10	3966.75	2949.02	3737.46	16489	10646.8	13202	17941.2	9372.97	14424.1
ENSMUSG00000021650.7	Ptcd2	1397.53	0.883616	0.127257	6.94357	3.823e-12	2.32667e-10	893.422	900.899	765.144	1628.85	1595.3	1482.05	1808	1746.05	1758.04
ENSMUSG00000051065.9	Mb21d2	180.222	3.42138	0.492741	6.94357	3.82316e-12	2.32667e-10	27.0734	6.84227	13.8991	247.219	106.11	186.108	475.298	204.92	354.528
ENSMUSG00000020661.15	Dnmt3a	5941.63	-0.897861	0.129578	-6.92912	4.23474e-12	2.56899e-10	7239.62	8071.6	7907.88	4311.87	4149.25	3997.92	6107.43	5266.95	6422.16
ENSMUSG00000108806.1	RP24-443B5.5	332.683	-1.75872	0.254086	-6.92175	4.46109e-12	2.69776e-10	726.971	478.959	456.585	170.721	178.557	142.261	322.043	226.089	291.964
ENSMUSG00000096954.1	Gdap10	2251.52	2.65853	0.384243	6.91887	4.5526e-12	2.74444e-10	250.679	262.287	420.447	2366.77	1657.51	1887.39	6419.12	2119.48	4879.97
ENSMUSG00000093507.1	RP24-201C14.11	81.7657	3.67245	0.532379	6.89819	5.26702e-12	3.16517e-10	2.00544	18.2461	6.25458	103.552	75.3744	100.362	184.321	91.4519	154.324
ENSMUSG00000066148.3	Prpf4	1293.92	1.2303	0.178553	6.89042	5.56263e-12	3.33236e-10	808.191	878.092	744.296	1947.9	2180	1560	1136.99	1298.11	1091.74
ENSMUSG00000045312.12	Lhfpl2	5492.84	-2.51816	0.365624	-6.88728	5.68686e-12	3.39617e-10	15099.9	12776.8	12973.4	2627.05	2618.35	1885.44	473.227	756.172	225.229
ENSMUSG00000035673.10	Sbno2	17135.4	1.78251	0.2589	6.88494	5.78133e-12	3.43138e-10	6796.42	5834.18	7766.8	28598.1	17478.8	24112.2	24915.4	15341.9	23374.8
ENSMUSG00000076066.1	Mir223	55.732	-2.56499	0.372551	-6.88493	5.78161e-12	3.43138e-10	99.2691	173.338	118.837	29.8529	19.0266	16.5646	18.6392	13.5484	12.5127
ENSMUSG00000027035.10	Cers6	14734	2.22592	0.323388	6.88312	5.85556e-12	3.46454e-10	3442.33	2273.92	3169.68	15682.1	9397.66	16510.1	34456.6	16922	30752.1
ENSMUSG00000032300.7	RP23-437A9.3	1436.27	-2.19297	0.319052	-6.87339	6.26936e-12	3.69796e-10	3248.81	1936.36	2621.37	830.282	367.359	511.554	1251.93	1210.89	947.84
ENSMUSG00000049091.6	Sephs2	1363.69	-1.48295	0.215931	-6.86772	6.52377e-12	3.83621e-10	2491.75	1696.88	2278.75	756.583	790.334	769.768	1392.76	917.059	1179.33
ENSMUSG00000028664.14	Ephb2	284.425	2.40772	0.350879	6.86196	6.79231e-12	3.98191e-10	29.0788	75.265	29.1881	258.414	203.438	197.801	695.862	581.736	489.039
ENSMUSG00000019979.12	Apaf1	5997.22	1.22654	0.179147	6.84654	7.56566e-12	4.42176e-10	3255.83	3756.41	3691.59	8746.89	8883.94	7410.23	7372.82	5454.94	5402.37
ENSMUSG00000018427.7	Ypel2	426.873	-2.35076	0.344329	-6.82706	8.66698e-12	5.05003e-10	932.528	811.95	1272.46	193.111	139.772	260.162	51.7754	64.355	115.743
ENSMUSG00000027951.16	Adar	9930.57	1.18725	0.174012	6.82278	8.92935e-12	5.18714e-10	4491.17	6075.94	4306.63	12352.6	10764.6	10719.3	14182.3	13462.1	13020.5
ENSMUSG00000097194.2	RP24-263E2.7	506.693	1.74849	0.256462	6.81774	9.24853e-12	5.35632e-10	125.34	230.357	212.656	657.696	514.449	723.971	706.217	646.091	743.465
ENSMUSG00000103730.1	RP23-243M12.5	1565.02	1.74332	0.255918	6.81205	9.62206e-12	5.55587e-10	457.239	604.401	324.543	1526.23	1648.72	1432.35	3339.52	2431.1	2321.11
ENSMUSG00000039936.18	Pik3cd	17434.1	1.47238	0.216202	6.8102	9.74634e-12	5.61073e-10	7409.08	6716.83	8160.84	23725.6	15333.9	22795.8	25592.6	20276.1	26896.1
ENSMUSG00000030019.6	Fbxl14	1563.94	0.953069	0.140164	6.79966	1.04868e-11	6.01894e-10	1101.99	1044.59	963.901	2126.08	1912.17	1979.96	1497.35	1829.04	1620.4
ENSMUSG00000001521.12	Tulp3	722.262	1.306	0.192336	6.79021	1.11972e-11	6.40749e-10	335.911	401.413	369.02	871.33	954.987	899.361	723.821	1082.18	862.336
ENSMUSG00000067206.3	Lrrc66	72.3156	2.9803	0.439521	6.78079	1.19522e-11	6.81917e-10	9.02446	18.2461	4.86468	55.0412	92.2056	66.2585	134.616	132.944	137.64
ENSMUSG00000020407.13	Upp1	780.714	4.19068	0.618345	6.77725	1.22484e-11	6.96742e-10	3.00815	18.2461	2.08486	101.686	158.067	67.2329	3291.88	1804.48	1579.73
ENSMUSG00000040723.14	Rcsd1	1206.96	-1.93483	0.28568	-6.77272	1.26387e-11	7.16817e-10	2323.3	1564.6	2834.72	542.016	457.369	761.973	676.187	749.398	953.053
ENSMUSG00000021266.16	Wars	11758.7	1.97677	0.292265	6.7636	1.34606e-11	7.58939e-10	1909.17	2011.63	1691.52	8029.48	5650.89	8403.13	30236.9	15508.7	32387.1
ENSMUSG00000029605.16	Oas1b	493.003	1.64766	0.243602	6.76374	1.34471e-11	7.58939e-10	178.484	328.429	206.401	662.36	790.334	746.382	475.298	570.728	478.612
ENSMUSG00000054855.13	Rnd1	160.795	2.91599	0.431642	6.75558	1.42261e-11	7.9975e-10	32.087	31.9306	31.9679	297.596	192.461	234.828	311.688	91.4519	223.144
ENSMUSG00000039449.14	Prpf18	2551.9	0.79475	0.117732	6.75049	1.47346e-11	8.25911e-10	1977.36	1945.49	1897.22	3403.23	3571.87	3118.05	2472.79	2381.98	2199.11
ENSMUSG00000025911.14	Adhfe1	149.409	2.22064	0.329008	6.74951	1.4835e-11	8.29118e-10	34.0924	22.8076	27.1032	143.667	152.944	102.311	340.682	316.695	204.375
ENSMUSG00000057143.15	Trim12c	3258.58	1.20922	0.179439	6.73893	1.59556e-11	8.89152e-10	1399.79	1708.29	1369.75	3335.12	3436.49	3561.39	5623.85	3951.06	4941.49
ENSMUSG00000026786.14	Apbb1ip	3366.6	-1.08236	0.160646	-6.73757	1.61052e-11	8.94889e-10	5558.07	6155.77	5545.04	2643.84	3166.46	2335.61	1486.99	1694.4	1713.2
ENSMUSG00000042042.14	Csgalnact2	3170.91	0.991445	0.147162	6.73712	1.61554e-11	8.95086e-10	2140.8	2670.77	2395.51	4412.62	4966.66	4931.38	2534.93	2362.51	2122.99
ENSMUSG00000025804.5	Ccr1	2252.77	3.33473	0.49512	6.73519	1.63716e-11	9.04446e-10	337.916	809.669	331.493	2783.78	8504.87	3580.88	1199.12	1922.18	804.986
ENSMUSG00000035725.13	Prkx	7354.77	1.34442	0.199719	6.73155	1.67867e-11	9.24715e-10	3026.2	2766.56	2719.35	8449.29	6499.77	6667.75	14869.9	10014	11180.1
ENSMUSG00000034157.12	Cipc	2412.25	-1.47356	0.21895	-6.73011	1.69535e-11	9.31229e-10	4657.62	3630.97	3831.98	1703.48	1448.95	1213.11	1602.97	2159.28	1461.9
ENSMUSG00000045795.10	Whamm	913.769	1.02428	0.15238	6.72186	1.79418e-11	9.82695e-10	503.364	447.029	502.452	984.211	886.199	1098.14	1321.31	1160.08	1321.14
ENSMUSG00000061458.9	Nol10	896.052	1.25856	0.187732	6.70402	2.0276e-11	1.10738e-09	451.223	483.521	359.986	981.413	1191.36	905.208	1321.31	1242.22	1128.23
ENSMUSG00000058624.12	Gda	4672.39	1.9509	0.291551	6.69146	2.20962e-11	1.20336e-09	1121.04	2157.6	1084.82	5042.33	6604.41	5178.88	7867.79	7204.38	5790.27
ENSMUSG00000104728.1	RP23-336O18.1	89.2473	2.8956	0.432765	6.69094	2.21741e-11	1.20418e-09	8.02174	25.0883	13.8991	112.881	114.159	93.5414	202.96	93.9922	138.683
ENSMUSG00000091366.1	RP23-115A1.9	66.3573	5.43382	0.812638	6.68665	2.28344e-11	1.23654e-09	5.01359	0	1.38991	148.331	58.5433	106.208	132.545	30.484	114.7
ENSMUSG00000034614.14	Pik3ip1	417.235	2.1132	0.316221	6.68269	2.34602e-11	1.26685e-09	130.353	91.2303	171.654	523.358	423.707	781.46	426.63	580.042	626.68
ENSMUSG00000086327.2	Slfn5os	7256.61	2.52477	0.378269	6.67452	2.48036e-11	1.33563e-09	1634.43	2314.97	778.348	11369.3	8676.11	7119.86	14752.9	9747.25	8916.37
ENSMUSG00000029798.11	Herc6	6702.66	1.70294	0.25518	6.67347	2.4983e-11	1.33778e-09	1531.15	2134.79	1124.44	5049.8	6032.88	4476.35	15212.7	11804.9	12956.9
ENSMUSG00000055447.19	Cd47	12844.2	0.71481	0.107106	6.67385	2.49175e-11	1.33778e-09	8528.12	7964.41	8721.67	12892.7	14268.5	14236.8	15943.7	16953.3	16088.3
ENSMUSG00000049734.9	Trex1	7492.17	1.9149	0.287078	6.6703	2.55284e-11	1.36317e-09	2327.31	3195.34	1565.04	10845	7233.75	8613.6	13363.2	9507.61	10778.7
ENSMUSG00000044468.14	Fam46c	5806.15	2.3426	0.3514	6.66648	2.62007e-11	1.39519e-09	1834.97	1753.9	1399.64	10889.8	7683.8	6722.31	11682.6	4538.72	5749.6
ENSMUSG00000015850.11	Adamtsl4	603.028	2.79085	0.41982	6.64775	2.97617e-11	1.58042e-09	102.277	93.5111	179.993	975.815	518.84	1130.29	907.106	431.856	1087.57
ENSMUSG00000053318.7	Slamf8	6540.26	3.6429	0.549581	6.62852	3.39076e-11	1.79561e-09	636.726	168.776	150.11	6036.81	2180.74	3744.58	21952.8	10212.1	13779.7
ENSMUSG00000001741.12	Il16	1304.48	-2.09838	0.316931	-6.62095	3.56906e-11	1.88482e-09	2885.82	1783.55	3215.55	549.479	478.591	815.564	472.192	705.365	834.182
ENSMUSG00000024014.7	Pim1	8939.52	2.29706	0.347198	6.61601	3.69034e-11	1.94351e-09	2049.56	1443.72	1560.17	10574.4	5481.84	8788.99	21300.4	9428.01	19828.5
ENSMUSG00000026637.13	Traf5	534.186	1.39597	0.211015	6.61549	3.70333e-11	1.94501e-09	347.943	234.918	362.766	914.244	725.936	876.95	406.955	443.711	494.253
ENSMUSG00000025730.14	Rab40c	956.368	-1.39232	0.210536	-6.61323	3.76034e-11	1.96955e-09	1599.34	1667.23	1574.07	561.607	563.479	719.099	481.512	766.333	674.645
ENSMUSG00000059810.18	Rgs3	159.622	-1.59968	0.242095	-6.60767	3.90413e-11	2.03929e-09	247.671	180.18	191.112	63.4373	68.7883	73.0792	223.67	163.428	225.229
ENSMUSG00000062585.11	Cnr2	1496.27	-1.79014	0.27166	-6.58964	4.40906e-11	2.29679e-09	1798.88	1683.2	2586.62	476.713	517.376	762.947	1867.02	1500.49	2273.15
ENSMUSG00000027708.14	Dcun1d1	1578.43	1.51004	0.229318	6.58493	4.55109e-11	2.36435e-09	721.957	789.142	611.559	2189.52	1733.61	2109.55	2528.71	1507.26	2014.55
ENSMUSG00000027639.16	Samhd1	68335.7	1.91879	0.29235	6.56331	5.26262e-11	2.72661e-09	14223.6	13020.8	12945.6	61961.5	37646.2	52354.9	187251	87831.9	147786
ENSMUSG00000031822.20	Gse1	1000.04	-1.72148	0.262669	-6.55381	5.60875e-11	2.89811e-09	1407.82	1074.24	1806.88	433.799	352.723	517.401	883.289	1316.74	1207.48
ENSMUSG00000032477.14	Cdc25a	751.148	1.33295	0.203399	6.5534	5.62415e-11	2.89825e-09	361.981	520.013	452.415	978.614	1294.54	1070.85	614.057	695.204	772.661
ENSMUSG00000019256.17	Ahr	646.928	1.98906	0.304013	6.5427	6.0419e-11	3.10518e-09	365.992	264.568	432.956	1728.67	1088.9	1427.48	218.492	111.775	183.52
ENSMUSG00000021067.8	Sav1	4277.36	1.36643	0.208875	6.54183	6.0772e-11	3.10666e-09	2272.16	1970.57	2129.34	5971.5	5549.17	4915.79	6751.52	4217.8	4718.34
ENSMUSG00000090125.3	Pou3f1	143.253	3.89623	0.595557	6.54217	6.06331e-11	3.10666e-09	8.02174	18.2461	2.77982	135.271	163.189	72.1048	272.339	450.485	166.836
ENSMUSG00000000791.9	Il12rb1	688.746	2.41154	0.368739	6.53997	6.15296e-11	3.13703e-09	42.1142	13.6845	12.5092	133.405	125.136	114.004	1921.9	2087.31	1748.65
ENSMUSG00000047798.15	Cd300lf	3967.83	2.1269	0.325559	6.53308	6.44303e-11	3.2762e-09	684.856	1772.15	1216.86	4225.11	5661.13	6127.94	4514.82	6145.91	5361.71
ENSMUSG00000022788.16	Fgd4	3937.94	-1.26734	0.194247	-6.52436	6.8293e-11	3.46343e-09	6274.01	8516.35	6926.6	2921.85	3426.24	2668.85	1436.25	1841.74	1429.58
ENSMUSG00000097471.8	RP23-128P10.1	238.155	-1.4646	0.224543	-6.52261	6.90966e-11	3.49494e-09	402.09	490.363	410.023	138.069	166.116	165.646	91.1248	146.492	133.469
ENSMUSG00000032596.14	Uba7	8348.55	1.00812	0.154581	6.52165	6.95391e-11	3.50806e-09	3254.82	4447.48	4305.24	8135.84	7882.85	8118.61	12822.7	12652.5	13516.9
ENSMUSG00000025646.9	Atrip	7900.25	1.7573	0.269726	6.51512	7.26294e-11	3.65434e-09	2695.31	3644.65	1938.23	11279.7	7631.11	9043.31	13767.1	9903.9	11198.9
ENSMUSG00000097062.1	Gm17586	197.865	-1.19361	0.18328	-6.51248	7.39197e-11	3.70953e-09	358.973	312.464	344.697	166.989	138.308	141.286	119.083	99.9197	99.0592
ENSMUSG00000032402.12	Smad3	401.851	-2.34229	0.359864	-6.50883	7.57366e-11	3.79078e-09	1105	595.278	966.681	255.615	95.8646	176.364	148.078	123.629	150.153
ENSMUSG00000059824.12	Dbp	610.285	-1.8333	0.282033	-6.50032	8.01492e-11	4.0012e-09	1684.57	809.669	1198.1	359.167	304.425	375.14	214.35	303.146	243.998
ENSMUSG00000045664.4	Cdc42ep2	1899.05	3.57212	0.549823	6.49686	8.20144e-11	4.08368e-09	229.622	57.019	132.736	2294.01	1012.07	1720.77	6310.39	1476.78	3858.09
ENSMUSG00000056592.14	Zfp658	180.645	-2.11895	0.326206	-6.49573	8.26297e-11	4.10366e-09	373.011	266.849	558.048	93.2902	68.0565	116.927	43.4914	55.0405	51.0937
ENSMUSG00000026558.13	Uck2	928.431	1.14977	0.177422	6.4804	9.14797e-11	4.53144e-09	587.593	736.685	541.369	1335.92	1257.95	1521.02	877.076	748.551	749.721
ENSMUSG00000007617.18	Homer1	1531.36	1.96709	0.30392	6.47239	9.6465e-11	4.76607e-09	493.337	522.294	482.298	2133.55	1961.2	1757.8	3248.39	1329.44	1853.97
ENSMUSG00000107215.1	RP23-253G12.9	350.107	1.68407	0.260439	6.46628	1.00442e-10	4.9498e-09	101.275	187.022	133.431	373.161	522.499	433.603	523.967	400.525	475.484
ENSMUSG00000028672.13	Hmgcl	2148.05	-0.66048	0.102169	-6.46456	1.01592e-10	4.99366e-09	2855.74	2816.74	2684.61	1697.88	1786.3	1800.67	1821.46	1939.97	1929.05
ENSMUSG00000021360.16	Gcnt2	214.938	2.40701	0.372537	6.46115	1.03912e-10	5.09462e-09	52.1413	95.7918	66.7156	355.436	406.144	355.652	222.634	277.743	102.187
ENSMUSG00000026104.14	Stat1	31244	1.95813	0.303253	6.45707	1.06749e-10	5.22035e-09	6226.88	8046.51	4463.69	27468.4	17482.5	27827.6	71748.3	44288.1	73643.7
ENSMUSG00000023032.12	Slc4a8	88.2553	2.62684	0.407218	6.4507	1.11338e-10	5.4309e-09	8.02174	13.6845	13.8991	60.6386	65.8612	91.5926	203.995	127.017	209.588
ENSMUSG00000072844.6	RP23-154O12.1	56.9438	4.02054	0.624748	6.43547	1.23094e-10	5.98909e-09	3.00815	15.9653	4.16972	81.1624	164.653	66.2585	67.3081	74.5164	35.4528
ENSMUSG00000007817.15	Zmiz1	9208.69	-1.06727	0.165859	-6.43479	1.23645e-10	6.0007e-09	14255.6	13369.8	16813.7	7992.17	7212.53	6006.14	5377.4	5933.37	5917.48
ENSMUSG00000024079.4	Eif2ak2	8742.81	1.9117	0.297282	6.43061	1.27092e-10	6.12556e-09	2553.92	4632.22	2058.45	11708.8	13126.1	9903.69	12700.5	11900.6	10100.9
ENSMUSG00000027425.18	Csrp2bp	2553.69	0.687152	0.106847	6.4312	1.26601e-10	6.12556e-09	1876.09	1929.52	1886.1	3264.22	2965.22	2930.96	2710.96	2622.47	2797.64
ENSMUSG00000056220.14	Pla2g4a	3584.95	2.26966	0.352952	6.43051	1.27176e-10	6.12556e-09	621.685	1507.58	594.88	3531.03	4898.61	4655.63	6207.87	4608.16	5639.07
ENSMUSG00000039116.6	Adgrg6	1020.46	1.59634	0.248483	6.42432	1.32458e-10	6.36398e-09	253.688	460.713	309.254	831.215	1162.08	1070.85	1674.42	1564.84	1857.1
ENSMUSG00000091144.2	Phf11d	205.802	1.83269	0.285307	6.42357	1.33117e-10	6.37965e-09	62.1685	79.8265	50.7316	258.414	220.269	189.032	426.63	265.888	299.263
ENSMUSG00000026430.16	Rassf5	1765.45	-0.972826	0.151854	-6.40632	1.49073e-10	7.1074e-09	2726.39	2367.43	2724.91	1283.67	1413.09	1290.09	1163.91	1478.47	1441.05
ENSMUSG00000032333.6	Stoml1	1719.02	1.19863	0.187111	6.40597	1.49415e-10	7.1074e-09	1022.77	814.231	945.832	2335.05	1678	2390.18	2186.99	2004.32	2093.8
ENSMUSG00000033985.17	Tesk2	418.955	-1.10631	0.172692	-6.40626	1.49133e-10	7.1074e-09	723.962	597.559	685.919	294.797	335.892	304.01	246.451	319.235	262.767
ENSMUSG00000032567.16	Aste1	944.684	1.72854	0.270675	6.38601	1.70269e-10	8.07934e-09	386.046	335.271	541.369	1408.68	1312.1	1484.97	1216.72	682.502	1134.49
ENSMUSG00000020089.8	Ppa1	1508.48	2.34097	0.36664	6.38493	1.71471e-10	8.11627e-09	252.685	426.502	161.924	1309.79	1902.66	1007.52	3016.44	3300.74	2198.07
ENSMUSG00000032369.13	Plscr1	672.51	1.22218	0.191475	6.38299	1.73658e-10	8.19955e-09	415.125	456.152	358.596	979.547	1037.68	836.026	773.525	626.615	569.329
ENSMUSG00000040213.13	Ccbl2	364.165	1.30515	0.204504	6.38201	1.74784e-10	8.23246e-09	151.41	141.407	144.55	358.234	336.624	388.781	637.873	460.647	657.961
ENSMUSG00000033909.17	Usp36	1492.93	1.23814	0.194105	6.37873	1.78566e-10	8.38999e-09	884.397	732.123	1016.72	2346.25	1916.56	1971.19	1626.78	1276.09	1666.28
ENSMUSG00000032020.15	Ubash3b	4110.52	1.59892	0.250995	6.37031	1.88646e-10	8.8419e-09	1069.9	1484.77	956.256	3893.93	3331.11	3384.05	9321.65	5485.42	8067.59
ENSMUSG00000022255.16	Mtdh	10317.2	1.15055	0.180773	6.36464	1.95753e-10	9.15265e-09	5347.49	5546.8	5415.08	10038	12070.9	14095.5	13671.8	11430.6	15238.4
ENSMUSG00000090946.3	Ccdc71l	3459.05	1.73782	0.273662	6.35022	2.1501e-10	1.00286e-08	1703.62	1284.07	1451.06	5070.32	5069.85	4674.15	5532.72	2556.42	3789.27
ENSMUSG00000029104.15	Htt	8869.36	1.11937	0.176593	6.33871	2.31691e-10	1.07804e-08	3386.18	4889.95	4217.67	9523.99	9101.28	8496.68	14731.1	12083.5	13393.8
ENSMUSG00000021408.15	Ripk1	11174.2	1.31876	0.208138	6.33598	2.35842e-10	1.0947e-08	7277.73	6737.36	6135.05	19229	14655.6	16378.5	12593.9	8073.17	9487.78
ENSMUSG00000087052.1	RP23-366K1.2	87.2847	1.78067	0.281255	6.33115	2.43344e-10	1.12679e-08	25.0679	43.3344	39.6124	123.143	131.722	108.157	103.551	93.1455	117.828
ENSMUSG00000031897.9	Psmb10	6404.09	0.978886	0.154895	6.31969	2.62095e-10	1.21069e-08	2856.74	2812.17	2217.6	5365.12	4656.38	5508.22	11675.4	10835.4	11709.8
ENSMUSG00000019876.15	Pkib	2766.55	1.1597	0.183605	6.31627	2.67958e-10	1.22889e-08	1488.03	1560.04	1059.11	3253.03	2972.53	2928.04	4214.52	3665.7	3757.99
ENSMUSG00000073490.11	Ifi207	31562.5	1.77614	0.281192	6.31645	2.67645e-10	1.22889e-08	14167.4	14081.4	9323.5	52306.9	35383.5	40983.8	51415.1	27985.1	38416.2
ENSMUSG00000081769.9	RP23-303F24.3	50.8253	2.93856	0.465201	6.31674	2.67131e-10	1.22889e-08	12.0326	4.56152	3.47477	58.7728	43.9074	52.617	96.3023	80.4438	105.316
ENSMUSG00000021066.9	Atl1	2046.42	1.34768	0.213392	6.31553	2.69244e-10	1.23184e-08	1124.05	898.619	1062.58	2828.56	2619.81	2416.49	3177.98	1960.29	2329.45
ENSMUSG00000090394.8	RP23-71J17.1	771.714	2.35228	0.37351	6.29776	3.01973e-10	1.37829e-08	193.525	171.057	148.025	1102.69	712.032	800.948	1936.4	636.776	1243.97
ENSMUSG00000027952.16	Pmvk	2775.47	1.72972	0.27488	6.29265	3.12096e-10	1.42111e-08	710.927	1051.43	713.718	3058.98	2093.65	3037.17	5688.05	3384.57	5240.75
ENSMUSG00000066755.2	Tnfsf18	37.9854	3.5692	0.567348	6.29103	3.15363e-10	1.43259e-08	11.0299	6.84227	4.16972	81.1624	114.891	60.4121	34.1718	13.5484	15.6409
ENSMUSG00000043895.6	S1pr2	9693.45	0.919421	0.146201	6.28874	3.20046e-10	1.45042e-08	6629.97	5711.02	6900.89	12676.3	10723.7	13014.9	9836.3	11148.7	10599.3
ENSMUSG00000047678.1	Gpr82	39.7938	2.681	0.426717	6.28286	3.32405e-10	1.50288e-08	12.0326	11.4038	14.594	84.894	72.4473	92.567	33.1363	24.5565	12.5127
ENSMUSG00000034522.10	Zfp395	728.859	-2.13769	0.340426	-6.27946	3.39757e-10	1.53251e-08	1502.07	1288.63	1739.47	332.113	279.544	418.987	172.93	472.502	353.485
ENSMUSG00000033792.12	Atp7a	5277.34	1.56067	0.248625	6.2772	3.44723e-10	1.55125e-08	2318.28	2107.42	2389.25	7737.49	5504.53	6869.45	8844.28	4745.34	6980.02
ENSMUSG00000037075.7	Rnf139	3835.84	0.97613	0.155692	6.26961	3.61964e-10	1.62502e-08	2415.55	2410.76	2346.16	4126.22	4886.17	5095.08	5019.11	3877.39	4346.09
ENSMUSG00000029635.15	Cdk8	968.225	0.985186	0.157258	6.26478	3.73346e-10	1.67221e-08	542.47	697.912	730.396	1273.41	1354.54	1268.66	943.348	917.906	985.378
ENSMUSG00000034987.4	Hrh2	165.702	2.43325	0.389417	6.24845	4.14554e-10	1.85245e-08	25.0679	34.2114	13.2041	109.149	158.067	97.4389	422.488	379.356	252.34
ENSMUSG00000040613.14	Apobec1	10095.6	-1.67764	0.268831	-6.2405	4.36188e-10	1.94007e-08	19429.7	18405.7	19307.2	6325.07	6076.06	5461.45	3950.47	7821.68	4083.32
ENSMUSG00000070034.13	Sp110	2373.62	1.19065	0.19079	6.24063	4.35812e-10	1.94007e-08	743.014	827.915	776.958	1969.36	1532.37	1852.31	5143.37	3621.67	4895.61
ENSMUSG00000002797.9	Ggct	508.97	2.74788	0.440625	6.23634	4.4793e-10	1.98769e-08	90.2446	41.0536	54.2064	543.882	307.352	411.192	1654.74	525.002	953.053
ENSMUSG00000079014.4	Serpina3i	199.996	7.55851	1.21247	6.23397	4.54757e-10	2.01333e-08	0	0	0.694954	86.7599	68.0565	79.8999	650.299	672.341	241.913
ENSMUSG00000098399.1	Gm27995	167.565	1.3768	0.221532	6.21489	5.13596e-10	2.26858e-08	61.1658	70.7035	77.8348	170.721	175.63	200.724	261.984	215.081	274.237
ENSMUSG00000026770.5	Il2ra	54.9202	4.67499	0.752412	6.21333	5.18724e-10	2.28324e-08	2.00544	6.84227	0.694954	43.8464	81.9606	49.6939	80.7697	161.734	66.7346
ENSMUSG00000029640.17	Usp12	4667.78	1.21609	0.195728	6.21316	5.19297e-10	2.28324e-08	2565.96	2118.82	1932.67	5754.14	4698.1	4922.62	8031.41	5802.96	6183.38
ENSMUSG00000024833.14	Pola2	1446.59	0.967464	0.155751	6.2116	5.24465e-10	2.30069e-08	688.867	859.846	699.818	1420.81	1588.72	1364.15	2322.65	2083.92	1990.57
ENSMUSG00000058486.11	Wdr91	3909.03	-1.03916	0.167303	-6.21123	5.2573e-10	2.30097e-08	5794.71	4885.38	6014.83	3048.72	2376.86	2703.93	3818.96	3100.05	3437.87
ENSMUSG00000020455.16	Trim11	1634.6	1.15752	0.18661	6.20289	5.54343e-10	2.42067e-08	1044.83	773.177	1125.83	2363.97	1903.39	2327.82	1724.12	1635.97	1812.26
ENSMUSG00000019960.8	Dusp6	446.664	-2.18543	0.353226	-6.18704	6.13026e-10	2.67084e-08	806.185	1090.2	732.481	170.721	242.955	162.723	171.894	425.929	216.887
ENSMUSG00000042719.17	Naa25	3807.09	1.53908	0.248873	6.18421	6.24135e-10	2.71308e-08	1287.49	2169	1168.91	4250.3	5001.79	4150.9	5556.54	5739.45	4939.4
ENSMUSG00000041238.15	Rbbp8	3725.13	1.73452	0.280514	6.18336	6.27531e-10	2.72167e-08	1194.24	1806.36	930.543	4260.56	4719.32	4068.08	7039.39	4266.91	5240.75
ENSMUSG00000029366.10	Dck	10040.2	2.31175	0.374031	6.18063	6.3845e-10	2.76277e-08	2008.44	4684.68	1670.67	12117.5	17112.9	12245.2	12431.3	16745.9	11344.9
ENSMUSG00000029401.8	Rilpl2	1352.88	-1.44187	0.233454	-6.17623	6.56492e-10	2.83445e-08	3061.3	2082.33	2158.53	880.659	1031.09	776.588	755.921	851.858	577.671
ENSMUSG00000083677.1	RP23-331L12.10	30.7533	-4.51694	0.732276	-6.16836	6.90014e-10	2.97176e-08	62.1685	86.6688	97.9885	2.7987	6.58612	0.974389	2.07102	14.3952	3.12818
ENSMUSG00000101628.1	RP24-194N4.4	22734.4	1.92442	0.311999	6.16804	6.91396e-10	2.97176e-08	4553.34	6005.24	3130.77	19560.1	12455.1	19921.4	52357.4	32543.3	54083.2
ENSMUSG00000037999.13	Arap2	1732.31	1.73049	0.280615	6.16678	6.96936e-10	2.98887e-08	682.851	907.742	514.961	2127.02	2759.58	2073.5	2882.86	1743.51	1898.81
ENSMUSG00000017929.13	B4galt5	12113.1	1.28049	0.20791	6.15888	7.32624e-10	3.13491e-08	7033.06	7113.68	6516.58	18536.8	13314.9	18340.9	15366.9	10244.3	12550.3
ENSMUSG00000021377.15	Dek	8241.04	1.10799	0.180049	6.15384	7.56277e-10	3.22891e-08	4616.51	5145.39	3824.33	9436.3	10905.1	8921.51	11941.5	10054.6	9324.07
ENSMUSG00000035208.16	Slfn8	7534.93	1.71496	0.279031	6.14613	7.93986e-10	3.38238e-08	3229.75	3060.78	2132.12	10987.7	8725.14	7926.66	14646.2	8218.82	8887.17
ENSMUSG00000078995.10	Zfp456	451.734	1.36545	0.222801	6.12857	8.86726e-10	3.76908e-08	304.826	248.603	232.115	624.111	687.151	714.227	520.861	326.009	407.707
ENSMUSG00000029415.4	Sdad1	2606.46	1.24409	0.203152	6.12393	9.12943e-10	3.86789e-08	1254.4	1373.02	1029.23	3306.2	2527.61	2812.09	4127.54	3005.21	4022.84
ENSMUSG00000046079.16	Lrrc8d	1695.45	-0.847201	0.138347	-6.12375	9.14008e-10	3.86789e-08	2411.54	2146.19	2555.35	1376.96	1278.44	1304.71	1279.89	1536.9	1369.1
ENSMUSG00000045404.16	Kcnk13	1919.61	-1.12259	0.183398	-6.12105	9.2963e-10	3.92533e-08	3464.39	2882.88	2874.33	1593.4	1404.31	1238.45	1256.07	1475.09	1087.57
ENSMUSG00000025577.7	Cbx2	76.1642	-2.66386	0.435223	-6.12068	9.31786e-10	3.92579e-08	194.527	145.969	211.961	30.7858	28.5398	28.2573	5.17754	28.7904	11.47
ENSMUSG00000032041.15	Tirap	1460.35	0.843756	0.138111	6.10927	1.00091e-09	4.20777e-08	1032.8	1208.8	1063.97	1946.03	2116.34	1852.31	1320.27	1203.27	1399.34
ENSMUSG00000026729.9	RP23-71J17.2	175.777	2.39053	0.391851	6.10063	1.05654e-09	4.43193e-08	43.1169	36.4921	35.4426	250.018	167.58	187.083	429.736	154.113	278.408
ENSMUSG00000063179.13	Pstk	855.56	1.18308	0.194079	6.09587	1.08845e-09	4.55581e-08	526.427	515.451	590.016	1152.13	1444.55	1114.7	888.466	639.317	828.969
ENSMUSG00000048118.17	Arid4a	6051.17	1.8725	0.307252	6.09436	1.09878e-09	4.58904e-08	2622.11	2084.61	2692.95	10897.2	6722.23	9488.6	8381.41	3928.2	7643.2
ENSMUSG00000084020.3	Wsb2-ps	88.6935	2.05411	0.337093	6.09361	1.10392e-09	4.60045e-08	34.0924	38.7729	22.9335	159.526	120.745	103.285	131.51	105	82.3755
ENSMUSG00000048756.11	Foxo3	2379.2	-1.49448	0.245339	-6.0915	1.1186e-09	4.65154e-08	4815.05	3179.38	4832.71	1671.76	1185.5	1699.34	1085.21	1476.78	1467.12
ENSMUSG00000044786.6	Zfp36	19138.3	2.30295	0.378147	6.09009	1.1285e-09	4.68255e-08	3876.51	2775.68	3156.48	20091.9	11904	16415.5	45098.5	17124.4	51801.7
ENSMUSG00000026536.9	Mnda	5217.71	2.80168	0.460748	6.08073	1.1964e-09	4.95357e-08	667.81	1279.51	242.539	5133.76	5646.5	4435.42	12628	8289.95	8635.87
ENSMUSG00000063236.6	RP24-324P21.9	1332.09	0.969414	0.159687	6.0707	1.27352e-09	5.26151e-08	464.258	394.571	500.367	851.739	838.632	990.954	2561.85	2502.23	2884.19
ENSMUSG00000035355.15	Kcnh4	41.7974	3.29255	0.543311	6.06016	1.35988e-09	5.60215e-08	6.01631	6.84227	2.08486	47.578	46.8346	33.1292	60.0595	92.2987	81.3328
ENSMUSG00000048175.13	Asb8	1617.91	0.645771	0.106564	6.05993	1.36182e-09	5.60215e-08	1142.1	1154.06	1145.98	1910.58	1741.66	1732.46	1882.55	1915.41	1936.35
ENSMUSG00000029859.6	Epha1	142.459	2.73111	0.450804	6.05831	1.37557e-09	5.64659e-08	8.02174	20.5268	18.0688	123.143	66.593	111.08	402.813	188.831	343.058
ENSMUSG00000040325.16	Vprbp	1128.27	1.50252	0.248024	6.05796	1.37858e-09	5.64687e-08	638.731	535.978	672.715	2140.08	1390.4	1716.87	1227.08	750.244	1082.35
ENSMUSG00000092416.2	Zfp141	575.991	0.855673	0.141315	6.05507	1.40356e-09	5.73696e-08	402.09	447.029	435.041	744.455	749.354	825.308	484.618	526.695	569.329
ENSMUSG00000047407.17	Tgif1	2151.61	-2.31975	0.383336	-6.05148	1.43518e-09	5.85371e-08	3032.22	2057.24	2676.27	723.932	360.041	472.579	4933.16	1745.21	3363.84
ENSMUSG00000033987.16	Dnah17	623.907	1.56439	0.259189	6.0357	1.58276e-09	6.44192e-08	206.56	223.514	274.507	794.832	571.529	724.946	1082.11	657.946	1079.22
ENSMUSG00000020573.17	Pik3cg	3413.56	-0.836027	0.13853	-6.03499	1.58972e-09	6.45655e-08	5657.33	5165.92	6056.52	3278.22	3147.43	3035.22	1515.98	1581.78	1283.6
ENSMUSG00000037991.9	Rmi2	60.1275	4.33801	0.719015	6.03327	1.60677e-09	6.51202e-08	3.00815	9.12303	1.38991	27.987	114.891	73.0792	71.4501	124.476	115.743
ENSMUSG00000022150.16	Dab2	41618.5	1.15367	0.191275	6.0315	1.62444e-09	6.56974e-08	23458.6	31465.3	23340.7	61564	57215.1	55319	41816.9	46718.4	33668.6
ENSMUSG00000022102.13	Dok2	2345.88	1.81887	0.30178	6.02713	1.66897e-09	6.73559e-08	630.71	1049.15	471.874	2543.09	2719.33	2291.76	4826.51	3393.88	3186.58
ENSMUSG00000105687.1	RP23-175B24.5	55.073	1.8489	0.306953	6.02339	1.70803e-09	6.87877e-08	31.0843	15.9653	28.4931	85.8269	99.5235	102.311	39.3493	48.2663	44.8373
ENSMUSG00000029319.8	Coq2	1019.25	1.09522	0.181842	6.02294	1.7128e-09	6.88351e-08	420.139	597.559	442.686	916.109	1144.52	1031.88	1551.19	1512.34	1556.79
ENSMUSG00000053897.15	Slc39a8	1433.45	0.934906	0.155329	6.01887	1.75636e-09	7.04381e-08	841.28	1017.22	958.341	1593.4	1855.82	1925.39	1417.61	1689.32	1602.67
ENSMUSG00000029860.16	Zyx	29668.1	2.17491	0.361763	6.01197	1.83285e-09	7.33522e-08	4556.35	3573.95	4809.08	26117.5	11555	20769.1	89719.6	38171.9	67740.8
ENSMUSG00000051212.8	Gpr183	556.64	-3.08783	0.514147	-6.00573	1.90467e-09	7.60678e-08	1150.12	1612.5	1289.14	104.485	240.759	130.568	61.095	311.614	109.486
ENSMUSG00000038970.7	Lmtk2	1199.29	1.62623	0.271283	5.99461	2.03972e-09	8.12918e-08	333.905	542.82	627.543	1283.67	1557.25	1801.65	1348.23	1431.05	1867.53
ENSMUSG00000026526.14	Fh1	4055.44	0.801716	0.133749	5.99416	2.04537e-09	8.1348e-08	2932.95	2600.06	2999.42	4518.98	4856.9	5515.04	4268.37	4301.63	4505.63
ENSMUSG00000043629.12	AC129337.1	28.3602	4.41862	0.739234	5.9773	2.2687e-09	9.00436e-08	1.00272	0	3.47477	45.7122	52.6889	29.2317	39.3493	52.5002	31.2818
ENSMUSG00000029405.16	G3bp2	11370.7	0.607111	0.101721	5.96841	2.39577e-09	9.48901e-08	7964.59	8130.9	7200.42	11888	12048.2	11530.9	14799.5	14324.9	14449.1
ENSMUSG00000037572.17	Wdhd1	2222.59	2.71467	0.455065	5.96546	2.43945e-09	9.6421e-08	277.753	1108.45	358.596	3812.77	4458.07	3126.82	2115.54	2961.18	1784.11
ENSMUSG00000012519.14	Mlkl	3251.25	1.89853	0.318647	5.9581	2.55185e-09	1.00656e-07	610.655	1142.66	478.128	2952.63	3058.15	2268.38	7490.87	5716.59	5543.14
ENSMUSG00000063800.5	Prpf38a	2187.97	1.26937	0.213494	5.94571	2.75262e-09	1.08353e-07	933.53	1044.59	724.142	1926.44	2567.85	1999.45	3606.68	3939.21	2949.88
ENSMUSG00000028879.4	Stx12	7031.48	1.19041	0.200307	5.94293	2.79969e-09	1.0998e-07	4213.42	3936.59	3606.12	9502.54	9109.33	8215.08	10531.1	6738.65	7430.48
ENSMUSG00000032788.15	Pdxk	8679.21	-1.16734	0.19646	-5.94185	2.81818e-09	1.10479e-07	17034.2	12094.9	14511.3	7401.64	6757.36	5274.37	4819.26	5465.1	4754.84
ENSMUSG00000042228.14	Lyn	15861.4	1.28119	0.215758	5.93811	2.88327e-09	1.128e-07	9088.64	6887.89	7003.05	21274.8	16007.2	18575.8	26410.6	18137.1	19367.6
ENSMUSG00000005125.13	Ndrg1	9484.24	1.42353	0.240052	5.93008	3.02784e-09	1.18215e-07	5145.95	4616.25	6163.55	16866.9	9755.5	16112.5	9498.72	7898.74	9300.09
ENSMUSG00000021895.10	Arhgef3	5265.96	2.09607	0.353817	5.92416	3.13903e-09	1.22307e-07	1978.36	723	1280.1	6490.2	4750.05	5809.31	10795.2	6166.23	9401.24
ENSMUSG00000025171.1	Ubtd1	2280.9	1.10232	0.186219	5.91945	3.23013e-09	1.25602e-07	1718.66	1297.75	1262.04	3424.68	2843.01	2925.12	2403.42	2587.75	2065.64
ENSMUSG00000002699.13	Lcp2	14334	2.49438	0.42208	5.90973	3.42673e-09	1.32977e-07	3856.45	2460.94	2733.25	22981.1	11947.9	16079.4	36563.8	10113.9	22269.5
ENSMUSG00000043059.16	Zfp513	1601.68	0.787034	0.133187	5.90923	3.43704e-09	1.33107e-07	1058.87	994.41	906.915	1849.01	1606.28	1648.67	2210.81	2011.94	2128.21
ENSMUSG00000090213.1	Tmem189	6595.96	-0.766625	0.129775	-5.90732	3.47721e-09	1.34391e-07	8561.21	7355.44	8579.2	4673.84	4998.13	4732.61	7358.32	6845.34	6259.5
ENSMUSG00000026655.15	Fam107b	1327.32	-1.19872	0.203574	-5.88835	3.90059e-09	1.50451e-07	2648.18	1765.31	2280.14	1019.66	1098.42	800.948	806.661	784.115	742.422
ENSMUSG00000028233.6	Tgs1	5095.02	1.00995	0.171769	5.87971	4.10978e-09	1.58202e-07	2754.47	2077.77	2668.62	5116.03	5136.44	4874.87	8749.01	6665.83	7812.12
ENSMUSG00000091479.1	RP23-19C9.2	1608.65	1.45162	0.247144	5.87358	4.26471e-09	1.63837e-07	911.471	684.227	1018.8	2826.69	1684.58	2661.06	1641.28	1398.03	1651.68
ENSMUSG00000036617.16	Etl4	1860.56	1.57716	0.26902	5.86261	4.55654e-09	1.74698e-07	920.495	850.723	996.564	3711.08	2128.05	2427.2	2380.63	1429.36	1900.89
ENSMUSG00000040857.15	Erf	873.821	-1.01078	0.172569	-5.85728	4.7051e-09	1.80033e-07	1023.78	1055.99	845.064	542.016	403.948	503.759	1133.88	1178.71	1177.24
ENSMUSG00000038332.13	Sesn1	7184.45	-1.20764	0.206349	-5.8524	4.84533e-09	1.8503e-07	15256.4	9882.52	12840.7	5227.98	4999.59	6221.48	3143.8	3184.73	3902.93
ENSMUSG00000074385.3	RP23-284E19.11	37.2122	3.42574	0.586112	5.84486	5.07003e-09	1.93226e-07	7.01903	0	7.64449	83.9611	46.1028	57.489	61.095	46.5727	25.0255
ENSMUSG00000024732.7	Ccdc86	1524.58	1.43118	0.245604	5.82717	5.63746e-09	2.14425e-07	714.938	832.477	453.11	1946.03	1913.63	1509.33	2276.05	2191.46	1884.21
ENSMUSG00000032589.14	Bsn	467.065	-2.0217	0.347244	-5.82213	5.81023e-09	2.20559e-07	769.085	757.212	830.47	181.916	202.706	195.852	253.7	697.744	314.904
ENSMUSG00000041135.15	Ripk2	1500.4	1.71858	0.29534	5.819	5.91993e-09	2.24279e-07	507.375	460.713	362.766	1613.92	1537.49	1222.86	3712.3	1722.34	2363.86
ENSMUSG00000078153.3	Psme2b	2195.17	1.04242	0.179173	5.81798	5.95641e-09	2.25216e-07	1127.05	1083.36	872.862	2371.44	1987.54	1981.91	3905.94	3022.99	3403.46
ENSMUSG00000029780.14	Nt5c3	3026.28	1.91264	0.329232	5.80942	6.26906e-09	2.36571e-07	1024.78	1236.17	729.007	3015.14	5242.55	2979.68	4087.15	5837.68	3084.39
ENSMUSG00000022151.16	Ttc33	1441.48	0.704304	0.121271	5.80767	6.33464e-09	2.38576e-07	1317.57	1179.15	1137.64	1910.58	1994.86	2017.96	1150.45	1183.79	1081.31
ENSMUSG00000024431.14	Nr3c1	6890.96	0.977893	0.168563	5.80135	6.57846e-09	2.47273e-07	5422.7	4556.95	4771.55	10691.1	9618.66	8751.97	7121.19	5536.23	5548.36
ENSMUSG00000037849.8	RP23-85A8.1	1174.94	2.80304	0.483429	5.79825	6.701e-09	2.51386e-07	187.508	332.991	66.0206	1551.42	1659.7	837.001	2273.98	2232.1	1433.75
ENSMUSG00000005804.14	Bloc1s6	1814.37	0.591026	0.101974	5.79587	6.79677e-09	2.54481e-07	1300.53	1320.56	1244.66	1933.91	1936.32	1944.88	2276.05	2121.18	2251.25
ENSMUSG00000039934.12	Gsap	3196.93	1.90111	0.328065	5.79493	6.83515e-09	2.55419e-07	1148.11	700.193	890.236	3926.58	2458.82	3857.61	7060.1	3221.99	5508.73
ENSMUSG00000026663.6	Atf6	13354.9	0.832667	0.143751	5.79243	6.93749e-09	2.58739e-07	7520.38	8495.82	8351.95	14974	13396.2	15024.1	18578.1	15106.5	18747.2
ENSMUSG00000070997.4	RP23-218A4.8	93.3775	1.87009	0.323358	5.78334	7.3233e-09	2.72597e-07	43.1169	61.5805	28.4931	194.976	128.063	140.312	79.7342	83.8309	80.2901
ENSMUSG00000027323.10	Rad51	1227.29	2.07482	0.358819	5.78237	7.36538e-09	2.73632e-07	181.492	504.048	202.927	1062.57	1474.56	1161.47	2318.5	2048.35	2091.71
ENSMUSG00000045411.16	AC152939.2	408.824	-1.01446	0.175533	-5.77931	7.50072e-09	2.78121e-07	607.647	538.259	618.509	336.777	250.272	290.368	376.925	321.775	338.887
ENSMUSG00000086291.1	AC104889.1	109.172	-3.0119	0.521217	-5.77859	7.53311e-09	2.78783e-07	297.807	91.2303	462.839	46.6451	24.8809	35.078	6.21305	8.46777	9.38455
[truncated: 27,473 more rows]

## Sheet: IFNG 2h vs UT (Platanitis)
Gene ID	Gene name	baseMean	log2FoldChange	lfcSE	stat	pvalue	padj	BMDM_UT_R1	BMDM_UT_R2	BMDM_UT_R3	BMDM_IFNG_2h_R1	BMDM_IFNG_2h_R2	BMDM_IFNG_2h_R3	BMDM_IFNB_2h_R1	BMDM_IFNB_2h_R2	BMDM_IFNB_2h_R3
[truncated: 23,496 more rows]

[truncated: 4 more sheets: Union ISG names, Union ISG GO, IFNG 24h vs UT (Qiao), IFNG 24h vs UT (McCann)]
