# Supplementary material for: Mouse B2 SINE elements function as IFN-inducible enhancers
Source: eLife. 2023 May 9;12:e82617. doi: 10.7554/eLife.82617 (PMC10229128; doi:10.7554/eLife.82617)
Supplement: Supplementary file 3. [file elife-82617-supp3.xlsx]

## Sheet: Description
Supplemental Table S3
Coordinates for STAT1-bound TEs in murine BMDMs using Dfam 2.0 annotation for mm10
Sheets
IFNG 2h STAT1 (Piccolo)	TE-derived STAT1 peaks from murine BMDMs treated with IFNG for 2h (Piccolo et al. 2017)
IFNG 1.5h STAT1 (Platanitis)	TE-derived STAT1 peaks from murine BMDMs treated with IFNG for 1.5h (Platanitis et al. 2019)
Description of columns
Chromosome	TE chromosome
Start	TE start coordinate
End	TE end coordinate
Family	TE family
Strand	TE strand
Peak chromosome	Peak chromosome
Summit start	Summit start coordinate
Summit end	Summit end coordinate
ChIP-seq data sources
Dataset	Accession
IFNG 2h STAT1 (Piccolo)	GSE84518
IFNG 1.5h STAT1 (Platanitis)	GSE115433

## Sheet: IFNG 2h STAT1 (Piccolo)
Chromosome	Start	End	Family	Strand	Peak chromosome	Summit start	Summit end
chr1	4873534	4874497	Lx7	+	chr1	4873590	4873591
chr1	6585972	6586625	RCHARR1	-	chr1	6586463	6586464
chr1	6623985	6624110	RSINE1	-	chr1	6624049	6624050
chr1	7112706	7112891	B2_Mm2	-	chr1	7112842	7112843
chr1	9704354	9704623	L1ME4c	+	chr1	9704418	9704419
chr1	9876775	9877010	L1M5	-	chr1	9876963	9876964
chr1	10114762	10114936	B2_Mm2	+	chr1	10114855	10114856
chr1	10219626	10220780	Lx9	+	chr1	10220256	10220257
chr1	13332720	13333050	L1M4	+	chr1	13332803	13332804
chr1	13511319	13514066	MuRRS-int	-	chr1	13513959	13513960
chr1	13593372	13593522	ORR1D2	+	chr1	13593432	13593433
chr1	13980395	13980630	ORR1F	-	chr1	13980411	13980412
chr1	16431388	16432991	L1MdFanc_I	+	chr1	16432322	16432323
chr1	16790547	16791415	RMER19B	+	chr1	16791200	16791201
chr1	23399511	23399933	L1ME1	+	chr1	23399765	23399766
chr1	23436238	23441258	L1MdV_I	+	chr1	23436870	23436871
chr1	34433170	34433427	RLTR30B_MM	-	chr1	34433412	34433413
chr1	34464317	34464894	L1MB8	-	chr1	34464391	34464392
chr1	34480841	34480962	L1ME4c	+	chr1	34480881	34480882
chr1	34496916	34497066	RMER5	+	chr1	34497013	34497014
chr1	34564489	34564819	L2b	-	chr1	34564545	34564546
chr1	36052668	36052931	ORR1F	-	chr1	36052833	36052834
chr1	36073118	36073456	ORR1F	+	chr1	36073174	36073175
chr1	36262232	36262333	PB1D7	-	chr1	36262293	36262294
chr1	36265017	36265203	MTE2a	-	chr1	36265092	36265093
chr1	36280360	36280551	B2_Mm2	+	chr1	36280400	36280401
chr1	36439890	36440070	B2_Mm2	+	chr1	36439951	36439952
chr1	36616917	36617199	L1_Rod	+	chr1	36617016	36617017
chr1	36874973	36875246	ORR1E	+	chr1	36875109	36875110
chr1	36918175	36918388	B3A	+	chr1	36918205	36918206
chr1	36947545	36947761	MLT1I	-	chr1	36947661	36947662
chr1	36986935	36987328	L1M7	-	chr1	36987254	36987255
chr1	37000113	37000567	L1MDa	+	chr1	37000478	37000479
chr1	37001946	37002274	L1MDa	+	chr1	37002161	37002162
chr1	37423741	37424572	RLTR13C1	+	chr1	37424039	37424040
chr1	37472281	37472490	L1M3b	+	chr1	37472415	37472416
chr1	37530675	37531215	L1M4b	+	chr1	37530774	37530775
chr1	37538769	37538960	B2_Mm2	+	chr1	37538835	37538836
chr1	37758895	37759473	L1MC4	+	chr1	37759195	37759196
chr1	37889119	37889724	Lx8	+	chr1	37889596	37889597
chr1	38777866	38778290	L1MC3	-	chr1	38777878	38777879
chr1	39530133	39530389	ORR1E	-	chr1	39530333	39530334
chr1	39579287	39579479	L2c	+	chr1	39579333	39579334
chr1	39707160	39707572	L1MD1	-	chr1	39707287	39707288
chr1	39768038	39768484	RMER4A	+	chr1	39768056	39768057
chr1	39918625	39919770	L1M4	-	chr1	39918822	39918823
chr1	39924851	39925068	MTC	+	chr1	39924935	39924936
chr1	40577453	40577860	MLTR14	+	chr1	40577574	40577575
chr1	43738251	43738459	B3	+	chr1	43738343	43738344
chr1	43821953	43822464	L1MC5a	+	chr1	43821953	43821954
chr1	44042248	44042574	MT2A	+	chr1	44042288	44042289
chr1	46964370	46964577	B3	-	chr1	46964498	46964499
chr1	51466869	51467037	B2_Mm2	-	chr1	51466965	51466966
chr1	51514584	51514768	Tigger15a	-	chr1	51514661	51514662
chr1	51669121	51669520	RLTR31C_MM	+	chr1	51669235	51669236
chr1	52100554	52100707	MIRb	-	chr1	52100683	52100684
chr1	52112398	52112544	L2a	-	chr1	52112487	52112488
chr1	52140837	52141021	B2_Mm2	+	chr1	52140890	52140891
chr1	52765539	52765685	B2_Mm2	-	chr1	52765588	52765589
chr1	52847824	52848008	Lx8	-	chr1	52847854	52847855
chr1	53837254	53837748	RLTR20B2	+	chr1	53837410	53837411
chr1	54523916	54524116	Helitron3Na_Mam	-	chr1	54523916	54523917
chr1	54564099	54564828	RCHARR1	+	chr1	54564121	54564122
chr1	54935016	54935235	ERVL-E-int	+	chr1	54935119	54935120
chr1	55017627	55017814	B2_Mm2	+	chr1	55017703	55017704
chr1	55213384	55213575	B2_Mm2	-	chr1	55213516	55213517
chr1	55335927	55336714	Lx9	+	chr1	55335953	55335954
chr1	55504608	55506368	Lx8	-	chr1	55505228	55505229
chr1	55506503	55506712	MIRb	+	chr1	55506672	55506673
chr1	55766674	55767011	L1M4	+	chr1	55766942	55766943
chr1	58396288	58396475	B3A	+	chr1	58396333	58396334
chr1	58450799	58450901	PB1D7	-	chr1	58450803	58450804
chr1	58498849	58499026	B2_Mm2	+	chr1	58498909	58498910
chr1	58618846	58619042	B3	+	chr1	58618937	58618938
chr1	58677664	58677843	B2_Mm2	+	chr1	58677713	58677714
chr1	58693779	58694073	L1M5	-	chr1	58693953	58693954
chr1	58715361	58715549	B2_Mm2	-	chr1	58715515	58715516
chr1	58716492	58716579	MTD	-	chr1	58716496	58716497
chr1	58801656	58801913	Lx9	+	chr1	58801766	58801767
chr1	59517708	59517891	B2_Mm2	-	chr1	59517833	59517834
chr1	59651817	59651912	B2_Mm2	-	chr1	59651863	59651864
chr1	59674110	59674279	B2_Mm2	+	chr1	59674155	59674156
chr1	59973201	59973386	B2_Mm2	-	chr1	59973302	59973303
chr1	59977533	59977689	B2_Mm2	-	chr1	59977625	59977626
chr1	60104345	60104490	B1_Mus1	+	chr1	60104438	60104439
chr1	60555169	60555335	BGLII_B2	+	chr1	60555225	60555226
chr1	60579950	60580178	MamGypLTR1b	-	chr1	60580102	60580103
chr1	60833838	60834063	L4_A_Mam	-	chr1	60833846	60833847
chr1	60937062	60937730	MamGypLTR1c	-	chr1	60937524	60937525
chr1	62307113	62307517	BGLII	-	chr1	62307409	62307410
chr1	62715145	62715352	B3	+	chr1	62715233	62715234
chr1	63088733	63088898	B2_Mm2	+	chr1	63088806	63088807
chr1	63915188	63915565	ORR1A1	-	chr1	63915401	63915402
chr1	64249478	64250364	RLTR13B1	+	chr1	64249813	64249814
chr1	64295278	64296037	L1M4b	+	chr1	64295510	64295511
chr1	64338879	64339013	MIR	+	chr1	64338933	64338934
chr1	64374792	64374882	AmnSINE1	+	chr1	64374842	64374843
chr1	64461702	64461879	B2_Mm2	+	chr1	64461759	64461760
chr1	64531665	64531801	RSINE1	-	chr1	64531756	64531757
chr1	64543844	64544021	B2_Mm2	+	chr1	64543921	64543922
chr1	64927821	64928210	LTR79	-	chr1	64927983	64927984
chr1	66816019	66816277	MIRb	-	chr1	66816127	66816128
chr1	66881758	66882206	RLTR30B_MM	+	chr1	66881836	66881837
chr1	74200801	74201413	L1MA8	-	chr1	74201217	74201218
chr1	74217356	74217565	MamTip3B	-	chr1	74217486	74217487
chr1	74369321	74369438	PB1D7	+	chr1	74369339	74369340
chr1	74398267	74398451	B3	+	chr1	74398269	74398270
chr1	74477289	74477438	ORR1A1-int	-	chr1	74477390	74477391
chr1	74477300	74477424	B1F2	-	chr1	74477390	74477391
chr1	74484064	74484249	B2_Mm2	+	chr1	74484150	74484151
chr1	74711211	74711379	B2_Mm2	+	chr1	74711298	74711299
chr1	74720822	74721307	RMER6B	+	chr1	74721071	74721072
chr1	74723846	74724052	B3	-	chr1	74723961	74723962
chr1	74997213	74997564	MTC	+	chr1	74997474	74997475
chr1	75122535	75122716	B2_Mm2	+	chr1	75122559	75122560
chr1	77213728	77214117	L1MEf	+	chr1	77213845	77213846
chr1	78486136	78486347	B3	+	chr1	78486218	78486219
chr1	79766297	79766649	MER57E2	+	chr1	79766407	79766408
chr1	79803604	79803815	MTEb	+	chr1	79803754	79803755
chr1	79825130	79825377	MER102c	+	chr1	79825236	79825237
chr1	80609731	80609873	L1MA8	+	chr1	80609810	80609811
chr1	80610118	80610747	Lx8b	+	chr1	80610740	80610741
chr1	80622621	80623093	RLTR30B_MM	+	chr1	80622709	80622710
chr1	80655930	80656134	B3	+	chr1	80655994	80655995
chr1	80785280	80785358	L1MD2	+	chr1	80785304	80785305
chr1	82693999	82694188	B2_Mm2	-	chr1	82694105	82694106
chr1	82831375	82831469	RSINE1	+	chr1	82831417	82831418
chr1	82841391	82841570	B2_Mm2	-	chr1	82841512	82841513
chr1	82888624	82888772	B2_Mm2	-	chr1	82888701	82888702
chr1	84147800	84148251	MTEb	+	chr1	84147908	84147909
chr1	84177786	84178155	L1ME1	+	chr1	84177951	84177952
chr1	84179409	84180054	L1MC4a	+	chr1	84179612	84179613
chr1	84191261	84191838	L1MC1	+	chr1	84191401	84191402
chr1	84321049	84321721	L3	-	chr1	84321525	84321526
chr1	84426880	84427064	ORR1C2	-	chr1	84426882	84426883
chr1	84752806	84752991	B3	+	chr1	84752859	84752860
chr1	84822997	84823108	URR1B	+	chr1	84823095	84823096
chr1	84882671	84882857	B3A	+	chr1	84882783	84882784
chr1	86228712	86228927	B3	-	chr1	86228900	86228901
chr1	86229886	86230088	B3	-	chr1	86229972	86229973
chr1	86264618	86264774	RSINE1	-	chr1	86264646	86264647
chr1	86430231	86430507	ORR1A4	+	chr1	86430317	86430318
chr1	86469708	86469885	B2_Mm2	+	chr1	86469759	86469760
chr1	86516002	86516133	B1F	-	chr1	86516125	86516126
chr1	86615761	86615922	B2_Mm2	-	chr1	86615840	86615841
chr1	87180719	87181008	MLT1C2	-	chr1	87180928	87180929
chr1	87348383	87348612	ID_B1	-	chr1	87348530	87348531
chr1	87348472	87348613	B3A	-	chr1	87348530	87348531
chr1	87490860	87491199	MTE2a	-	chr1	87490947	87490948
chr1	87554861	87555288	MTE2a	+	chr1	87555194	87555195
chr1	87624981	87625568	L1MB7	-	chr1	87625083	87625084
chr1	87864584	87864665	B3	-	chr1	87864625	87864626
chr1	87884680	87884868	B3A	-	chr1	87884746	87884747
chr1	87963626	87963820	B2_Mm2	+	chr1	87963701	87963702
chr1	88449797	88450613	L1MEc	-	chr1	88450006	88450007
chr1	88567256	88567491	RMER20B	+	chr1	88567283	88567284
chr1	91235402	91235873	RMER6B	-	chr1	91235713	91235714
chr1	92679032	92679243	L1ME3G	+	chr1	92679047	92679048
chr1	94053527	94053638	Tigger8	+	chr1	94053539	94053540
chr1	94582027	94582420	MTD	-	chr1	94582196	94582197
chr1	95399770	95399957	B3	+	chr1	95399881	95399882
chr1	95492812	95493179	Lx5c	-	chr1	95493175	95493176
chr1	97662494	97662595	PB1D7	-	chr1	97662563	97662564
chr1	97662496	97662627	MT2B2	-	chr1	97662563	97662564
chr1	97672966	97673155	LX3	+	chr1	97673043	97673044
chr1	97877110	97877282	B2_Mm2	+	chr1	97877131	97877132
chr1	105170939	105171208	ORR1D1-int	-	chr1	105171148	105171149
chr1	105658629	105658817	B2_Mm2	-	chr1	105658749	105658750
chr1	105930117	105931672	RMER17C-int	+	chr1	105931478	105931479
chr1	105932433	105932740	RMER17C-int	+	chr1	105932647	105932648
chr1	105965260	105965658	MLT1A1	+	chr1	105965332	105965333
chr1	106760391	106760405	ORR1B2-int	-	chr1	106760402	106760403
chr1	106791947	106792168	B3	+	chr1	106791991	106791992
chr1	106918345	106918610	RLTR30B_MM	-	chr1	106918536	106918537
chr1	112452493	112452639	B2_Mm2	+	chr1	112452556	112452557
chr1	118476967	118477149	B3	+	chr1	118477052	118477053
chr1	118564697	118564878	B2_Mm2	-	chr1	118564811	118564812
chr1	119481614	119481812	B3	+	chr1	119481698	119481699
chr1	119917254	119917710	RLTR14_RN	-	chr1	119917255	119917256
chr1	119934671	119934811	RMER15	+	chr1	119934708	119934709
chr1	121380682	121380833	RMER15	+	chr1	121380703	121380704
chr1	125467951	125468021	ID4	+	chr1	125468017	125468018
chr1	125470946	125471004	B4	-	chr1	125470988	125470989
chr1	125576840	125577086	L2d2	+	chr1	125576861	125576862
chr1	127086157	127086826	Lx9	+	chr1	127086180	127086181
chr1	127118153	127118331	B4A	+	chr1	127118207	127118208
chr1	127219342	127219442	MIR	-	chr1	127219397	127219398
chr1	128068965	128069438	RLTR30D_RN	-	chr1	128069260	128069261
chr1	128108295	128108674	L1MD2	+	chr1	128108502	128108503
chr1	128126209	128126346	B3	-	chr1	128126254	128126255
chr1	128191462	128191619	B2_Mm2	-	chr1	128191538	128191539
chr1	128407459	128407642	B2_Mm2	+	chr1	128407519	128407520
chr1	128441637	128441828	B2_Mm2	+	chr1	128441721	128441722
chr1	128512184	128512308	B2_Mm2	-	chr1	128512222	128512223
chr1	128625688	128625855	B3	-	chr1	128625806	128625807
chr1	128724581	128724711	MIR3	+	chr1	128724650	128724651
chr1	128825088	128825297	B4	-	chr1	128825134	128825135
chr1	128876331	128876630	Lx8	-	chr1	128876572	128876573
chr1	129388887	129390005	L1MC4	-	chr1	129389578	129389579
chr1	131365951	131366247	ORR1E	-	chr1	131366114	131366115
chr1	131385546	131385929	Lx5b	+	chr1	131385796	131385797
chr1	131387046	131387404	L1MB7	-	chr1	131387274	131387275
chr1	131444841	131445022	B3A	+	chr1	131444911	131444912
chr1	131658099	131658199	MIRb	-	chr1	131658148	131658149
chr1	131915727	131915980	L3	+	chr1	131915874	131915875
chr1	132000611	132000798	B2_Mm2	-	chr1	132000721	132000722
chr1	132010916	132011240	L1MB8	-	chr1	132011079	132011080
chr1	132080622	132081009	MTE2a	-	chr1	132080634	132080635
chr1	132133638	132133824	L2	+	chr1	132133687	132133688
chr1	132236275	132236457	B2_Mm2	-	chr1	132236394	132236395
chr1	132264667	132264865	L2c	-	chr1	132264806	132264807
chr1	133013420	133013601	B2_Mm2	+	chr1	133013488	133013489
chr1	133317254	133317418	B2_Mm2	-	chr1	133317370	133317371
chr1	134435490	134435689	B3	-	chr1	134435576	134435577
chr1	134477725	134477912	B3	-	chr1	134477854	134477855
chr1	134818934	134819029	L1ME4c	-	chr1	134819015	134819016
chr1	135703997	135704129	L1MEc	-	chr1	135704000	135704001
chr1	135706428	135706616	B2_Mm2	-	chr1	135706541	135706542
chr1	135743299	135743416	MIR3	+	chr1	135743312	135743313
chr1	135747554	135747730	B2_Mm2	+	chr1	135747622	135747623
chr1	136340644	136340824	B2_Mm2	+	chr1	136340707	136340708
chr1	136556716	136556901	B2_Mm2	+	chr1	136556784	136556785
chr1	136608510	136608714	B3	-	chr1	136608630	136608631
chr1	136690280	136690579	MTE2a	+	chr1	136690507	136690508
chr1	136744453	136744608	B2_Mm1t	-	chr1	136744543	136744544
chr1	137751243	137751857	L1M3d	+	chr1	137751752	137751753
chr1	138009564	138009833	RMER15	+	chr1	138009648	138009649
chr1	138124016	138124170	B2_Mm2	-	chr1	138124132	138124133
chr1	138137802	138138014	ID_B1	+	chr1	138137909	138137910
chr1	138243940	138244332	MTD	+	chr1	138244079	138244080
chr1	138313660	138316686	L1Lx_IV	+	chr1	138314298	138314299
chr1	138343516	138343844	MTE2b	-	chr1	138343600	138343601
chr1	138364515	138364615	MIR1_Amn	+	chr1	138364562	138364563
chr1	139407821	139408010	B3A	-	chr1	139407919	139407920
chr1	139488714	139488892	B2_Mm2	-	chr1	139488817	139488818
chr1	143764554	143764745	B2_Mm2	-	chr1	143764684	143764685
chr1	143985049	143985247	ORR1F	+	chr1	143985204	143985205
chr1	144334631	144335070	RLTR30E_MM	+	chr1	144334857	144334858
chr1	149911121	149911281	MIRb	-	chr1	149911222	149911223
chr1	149923988	149924074	Lx8	-	chr1	149924017	149924018
chr1	150374294	150374505	B2_Mm2	+	chr1	150374379	150374380
chr1	150395820	150396075	RMER6B	+	chr1	150396061	150396062
chr1	151039268	151039457	MIR1_Amn	-	chr1	151039377	151039378
chr1	151250729	151250911	MLT1H1	+	chr1	151250847	151250848
chr1	151625274	151625986	L1ME3Cz	+	chr1	151625899	151625900
chr1	151756422	151756665	L1ME3G	+	chr1	151756587	151756588
chr1	151764294	151765059	L1M5	-	chr1	151764402	151764403
chr1	151976756	151977295	L1ME3G	-	chr1	151976938	151976939
chr1	152038590	152038735	MIRc	-	chr1	152038625	152038626
chr1	152429761	152430339	L1M3	+	chr1	152430090	152430091
chr1	152528841	152529030	L1MEd	+	chr1	152528982	152528983
chr1	152616267	152616353	B1_Mus2	-	chr1	152616329	152616330
chr1	153304241	153304397	RSINE1	+	chr1	153304270	153304271
chr1	153410620	153410765	B1_Mm	-	chr1	153410761	153410762
chr1	153415112	153415263	RSINE1	-	chr1	153415254	153415255
chr1	153489523	153489721	B2_Mm1t	-	chr1	153489638	153489639
chr1	153546777	153546963	B2_Mm2	-	chr1	153546943	153546944
chr1	153749294	153749574	MER90	+	chr1	153749519	153749520
chr1	154040398	154040569	B2_Mm2	-	chr1	154040470	154040471
chr1	154097700	154098035	L1MB3	-	chr1	154097919	154097920
chr1	155070532	155070616	PB1D7	+	chr1	155070573	155070574
chr1	155076142	155076355	L2b	-	chr1	155076163	155076164
chr1	155145978	155146153	B3	-	chr1	155146051	155146052
chr1	155165823	155166003	B2_Mm2	-	chr1	155165925	155165926
chr1	155625489	155625683	B2_Mm2	-	chr1	155625624	155625625
chr1	155836986	155837136	B2_Mm2	-	chr1	155837090	155837091
chr1	155948175	155950571	Lx6	+	chr1	155949291	155949292
chr1	156037316	156037425	B1_Mur2	-	chr1	156037422	156037423
chr1	156344506	156344987	RLTR30B_MM	+	chr1	156344588	156344589
chr1	156589430	156589510	B1_Mur2	-	chr1	156589468	156589469
chr1	157048245	157048422	X12_DNA	-	chr1	157048352	157048353
chr1	157793827	157793986	RLTR30B_MM	+	chr1	157793890	157793891
chr1	160378447	160378638	B2_Mm1t	+	chr1	160378523	160378524
chr1	160935673	160935858	B2_Mm2	-	chr1	160935789	160935790
chr1	161076257	161076407	B1F2	-	chr1	161076329	161076330
chr1	161214578	161214750	B2_Mm2	-	chr1	161214682	161214683
chr1	161254789	161254962	B2_Mm1t	+	chr1	161254827	161254828
chr1	161350579	161351346	ERVL-B4-int	+	chr1	161351186	161351187
chr1	161466676	161466888	B3	+	chr1	161466774	161466775
chr1	161497430	161497603	MIRb	+	chr1	161497440	161497441
chr1	162549989	162550148	B2_Mm2	-	chr1	162550136	162550137
chr1	162560385	162560586	L1MB2	+	chr1	162560488	162560489
chr1	162620545	162620729	B2_Mm2	+	chr1	162620646	162620647
chr1	164958046	164958269	B3	+	chr1	164958117	164958118
chr1	165133930	165134212	L1MB7	+	chr1	165134029	165134030
chr1	165146119	165146304	B2_Mm2	+	chr1	165146212	165146213
chr1	165388948	165389168	B3	-	chr1	165389091	165389092
chr1	166158730	166158922	B2_Mm2	-	chr1	166158839	166158840
chr1	166787873	166788187	LTR78B	+	chr1	166788051	166788052
chr1	166802121	166802240	ORR1F	+	chr1	166802159	166802160
chr1	166932627	166933059	RLTR30B_MM	+	chr1	166932707	166932708
chr1	167245997	167246729	L1M4	+	chr1	167246537	167246538
chr1	167340763	167340918	B2_Mm2	+	chr1	167340785	167340786
chr1	167351595	167351785	B2_Mm2	-	chr1	167351743	167351744
chr1	170160289	170160737	L1MEg1	+	chr1	170160682	170160683
chr1	170545482	170545619	L1MC4	+	chr1	170545512	170545513
chr1	170845839	170846346	RMER4B	+	chr1	170846117	170846118
chr1	170872090	170872268	B2_Mm2	-	chr1	170872194	170872195
chr1	170903393	170903666	LTR78	-	chr1	170903559	170903560
chr1	170992433	170992770	ORR1B2	+	chr1	170992698	170992699
chr1	171050890	171051158	L2a	-	chr1	171051012	171051013
chr1	171184399	171184601	URR1B	-	chr1	171184505	171184506
chr1	171211002	171211055	B3A	+	chr1	171211046	171211047
chr1	171211703	171211785	RMER19C	+	chr1	171211766	171211767
chr1	171223394	171223559	B2_Mm2	+	chr1	171223515	171223516
chr1	171363544	171363727	B2_Mm2	+	chr1	171363554	171363555
chr1	171410415	171410605	MIRb	-	chr1	171410428	171410429
chr1	171466075	171466256	LTR73	+	chr1	171466151	171466152
chr1	171619114	171619310	RMER19B	+	chr1	171619252	171619253
chr1	171660521	171661158	MER77B	-	chr1	171660639	171660640
chr1	171661393	171661704	MLT1A0	-	chr1	171661673	171661674
chr1	171702393	171702570	B2_Mm2	-	chr1	171702494	171702495
chr1	171747115	171747211	MTEb	-	chr1	171747158	171747159
chr1	171815915	171815987	MER20	-	chr1	171815960	171815961
chr1	171826062	171826448	L1MEg2	-	chr1	171826433	171826434
chr1	171827756	171827901	MLT1A0	+	chr1	171827885	171827886
chr1	172048408	172048613	RLTR12D	+	chr1	172048490	172048491
chr1	172154967	172155077	B1_Mm	-	chr1	172155073	172155074
chr1	172154977	172155164	ORR1B1-int	-	chr1	172155073	172155074
chr1	172423284	172423769	RLTR28B	-	chr1	172423548	172423549
chr1	172473102	172473181	MTE2a	-	chr1	172473106	172473107
chr1	172566258	172566601	ORR1F	-	chr1	172566391	172566392
chr1	172643655	172644649	MLT1H2-int	+	chr1	172643832	172643833
chr1	172711629	172711897	Lx8	+	chr1	172711646	172711647
chr1	173430416	173430753	ORR1F	+	chr1	173430525	173430526
chr1	173450891	173451406	L2	+	chr1	173451218	173451219
chr1	173452391	173452637	L2a	-	chr1	173452530	173452531
chr1	173466323	173466705	L1MCc	+	chr1	173466351	173466352
chr1	173628382	173628857	RLTR30D_MM	+	chr1	173628558	173628559
chr1	173809283	173809579	Lx5	-	chr1	173809430	173809431
chr1	173873439	173873603	B2_Mm2	+	chr1	173873512	173873513
chr1	175652006	175652089	PB1D11	-	chr1	175652062	175652063
chr1	175652008	175652103	ID_B1	-	chr1	175652062	175652063
chr1	175734553	175734716	B2_Mm2	+	chr1	175734629	175734630
chr1	175877210	175877398	B2_Mm2	-	chr1	175877307	175877308
chr1	176705681	176705806	LTR109A2	-	chr1	176705699	176705700
chr1	176816813	176817189	MLTR11B	-	chr1	176817053	176817054
chr1	176824101	176824216	LTR82A	+	chr1	176824142	176824143
chr1	176973628	176973776	L1MdFanc_II	+	chr1	176973637	176973638
chr1	177261364	177261517	B3A	+	chr1	177261419	177261420
chr1	177513836	177513916	ID4	+	chr1	177513862	177513863
chr1	178242181	178242353	B2_Mm2	+	chr1	178242254	178242255
chr1	178655881	178656064	MER58A	+	chr1	178655975	178655976
chr1	179507039	179507218	B2_Mm2	-	chr1	179507130	179507131
chr1	180230680	180230847	B3	+	chr1	180230755	180230756
chr1	180260962	180261222	ORR1F	-	chr1	180261129	180261130
chr1	180263496	180263720	L1M5	+	chr1	180263630	180263631
chr1	180293653	180293759	PB1D7	+	chr1	180293752	180293753
chr1	180296018	180296094	Charlie4a	+	chr1	180296051	180296052
chr1	180536778	180537041	ORR1E	-	chr1	180536887	180536888
chr1	180698222	180698371	B3A	-	chr1	180698278	180698279
chr1	180701848	180702040	B2_Mm2	-	chr1	180701960	180701961
chr1	180939512	180939686	B2_Mm2	-	chr1	180939591	180939592
chr1	180973876	180974000	L4_B_Mam	+	chr1	180973942	180973943
chr1	181310687	181311398	HERV16-int	+	chr1	181310985	181310986
chr1	181485854	181486041	B2_Mm2	-	chr1	181485969	181485970
chr1	181953135	181953308	B2_Mm2	+	chr1	181953226	181953227
chr1	182378207	182378549	Lx8	+	chr1	182378545	182378546
chr1	183047662	183047878	MIRb	-	chr1	183047759	183047760
chr1	184063095	184063317	RLTR12A	+	chr1	184063158	184063159
chr1	184274635	184274957	MTC	+	chr1	184274887	184274888
chr1	184441271	184441509	X12_DNA	+	chr1	184441349	184441350
chr1	184573925	184574666	RMER13A	+	chr1	184574470	184574471
chr1	184613558	184614026	MTEa	+	chr1	184613921	184613922
chr1	184614950	184615295	MLT1H	+	chr1	184615010	184615011
chr1	184769588	184769773	B2_Mm2	-	chr1	184769696	184769697
chr1	189937467	189937584	B2_Mm2	+	chr1	189937525	189937526
chr1	191000051	191000318	MTEb	-	chr1	191000186	191000187
chr1	191057680	191057930	Tigger20a	+	chr1	191057764	191057765
chr1	191087558	191087651	ID4	-	chr1	191087626	191087627
chr1	191112315	191112486	B2_Mm2	-	chr1	191112446	191112447
chr1	191197354	191197541	B2_Mm2	-	chr1	191197536	191197537
chr1	191275723	191275902	RMER30	-	chr1	191275742	191275743
chr1	191443735	191443902	L2c	+	chr1	191443760	191443761
chr1	191445510	191445849	ORR1D2	-	chr1	191445777	191445778
chr1	191505570	191505754	B2_Mm2	+	chr1	191505644	191505645
chr1	191592357	191592809	Charlie1	-	chr1	191592600	191592601
chr1	191661177	191661634	RLTR28B	-	chr1	191661350	191661351
chr1	191692835	191693372	RLTR20B5_MM	+	chr1	191692851	191692852
chr1	191712190	191712529	RLTR31C_MM	-	chr1	191712432	191712433
chr1	191986734	191987088	RLTR9A4	-	chr1	191986963	191986964
chr1	194759636	194759808	B2_Mm2	+	chr1	194759698	194759699
chr10	4337464	4337646	B2_Mm2	-	chr10	4337565	4337566
chr10	4600916	4601270	MTE2b	+	chr10	4601259	4601260
chr10	4787020	4787371	MLT1B	-	chr10	4787162	4787163
chr10	5272216	5272563	ORR1B2	+	chr10	5272288	5272289
chr10	5887297	5887442	Lx5b	-	chr10	5887422	5887423
chr10	6715585	6716087	MT2A	-	chr10	6715776	6715777
chr10	6983740	6984134	MTE2a	-	chr10	6983793	6983794
chr10	7050071	7050312	L1ME4b	+	chr10	7050077	7050078
chr10	7069190	7069318	B2_Mm2	+	chr10	7069260	7069261
chr10	7600450	7600629	RSINE1	-	chr10	7600565	7600566
chr10	7983244	7983944	LTR78B	-	chr10	7983871	7983872
chr10	8066983	8067363	Lx8	-	chr10	8067099	8067100
chr10	8342816	8343028	L2c	-	chr10	8342816	8342817
chr10	8369958	8370286	HAL1	+	chr10	8370023	8370024
chr10	8811722	8811990	L1MC4	+	chr10	8811887	8811888
chr10	8832753	8833147	RLTR23	+	chr10	8832801	8832802
chr10	9738846	9739167	ORR1B1	+	chr10	9739126	9739127
chr10	9876007	9876384	MTC	-	chr10	9876083	9876084
chr10	9880085	9882000	L1Lx_IV	+	chr10	9880591	9880592
chr10	9920191	9920653	RMER16	+	chr10	9920230	9920231
chr10	10654510	10655207	L1M2	+	chr10	10654906	10654907
chr10	10665440	10665624	B2_Mm2	-	chr10	10665542	10665543
chr10	12473536	12473888	MLT1D	-	chr10	12473621	12473622
chr10	12954810	12955006	B2_Mm2	-	chr10	12954935	12954936
chr10	12992647	12993765	L1_Rod	+	chr10	12993693	12993694
chr10	13870698	13870846	B3	-	chr10	13870765	13870766
chr10	13935737	13936311	Lx8b	-	chr10	13935871	13935872
chr10	13992933	13992994	Lx9	-	chr10	13992986	13992987
chr10	14114468	14115250	Lx9	-	chr10	14115164	14115165
chr10	14147562	14148245	RLTR17	-	chr10	14148155	14148156
chr10	14685738	14685929	B3	+	chr10	14685834	14685835
chr10	15262366	15263102	ERVB2_1A-I_MM	-	chr10	15262530	15262531
chr10	16015346	16020683	L1MdFanc_I	+	chr10	16015968	16015969
chr10	16088352	16088530	B3	+	chr10	16088409	16088410
chr10	16652595	16653073	L1MCb	+	chr10	16652636	16652637
chr10	17415972	17416451	MLT1F	-	chr10	17416373	17416374
chr10	17613263	17613468	MER63B	+	chr10	17613466	17613467
chr10	17676616	17676740	MIRb	-	chr10	17676670	17676671
chr10	17683920	17684736	Lx8	-	chr10	17684110	17684111
chr10	17788058	17788432	L1MEd	+	chr10	17788131	17788132
chr10	17788432	17788633	URR1B	-	chr10	17788456	17788457
chr10	18004993	18005437	RLTR31C_MM	-	chr10	18005347	18005348
chr10	18172079	18172259	B2_Mm2	+	chr10	18172149	18172150
chr10	18232925	18233074	B2_Mm2	-	chr10	18233021	18233022
chr10	18233816	18233946	B2_Mm2	-	chr10	18233939	18233940
chr10	18943694	18943792	MTC	-	chr10	18943731	18943732
chr10	19059539	19059694	L1MC3	+	chr10	19059569	19059570
chr10	19063591	19063835	L1M5	-	chr10	19063677	19063678
chr10	19244010	19244174	B2_Mm2	+	chr10	19244073	19244074
chr10	19547927	19548365	RMER10A	+	chr10	19548230	19548231
chr10	19765461	19765772	ORR1E	-	chr10	19765705	19765706
chr10	20314936	20315095	B2_Mm2	-	chr10	20315015	20315016
chr10	20349093	20349211	MTC	+	chr10	20349117	20349118
chr10	20771965	20772339	L1MEc	-	chr10	20772185	20772186
chr10	20835199	20835959	L1M3	-	chr10	20835383	20835384
chr10	20919274	20919975	RMER19B2	-	chr10	20919837	20919838
chr10	21777115	21777950	L1MD3	-	chr10	21777388	21777389
chr10	22302257	22302501	RMER15	-	chr10	22302489	22302490
chr10	24115278	24116304	RLTR13D4	+	chr10	24115799	24115800
chr10	24622645	24622843	B3	+	chr10	24622723	24622724
chr10	24635587	24635844	ORR1E	+	chr10	24635753	24635754
chr10	24950373	24950558	MIRc	+	chr10	24950420	24950421
chr10	24994001	24994156	MMERVK10C-int	-	chr10	24994143	24994144
chr10	25128511	25128573	RMER15	+	chr10	25128520	25128521
chr10	25318559	25318776	LTR33B	-	chr10	25318630	25318631
chr10	25321407	25321564	MER58B	-	chr10	25321423	25321424
chr10	25919729	25919842	RLTR24B_MM	+	chr10	25919836	25919837
chr10	26558008	26558431	MLT1F	+	chr10	26558291	26558292
chr10	26828532	26828699	L3b	+	chr10	26828568	26828569
chr10	26895820	26896098	L2a	-	chr10	26895966	26895967
chr10	30550071	30550275	L1MB7	+	chr10	30550234	30550235
chr10	34141607	34142609	L1MdV_III	+	chr10	34142191	34142192
chr10	34210184	34210559	L3	-	chr10	34210238	34210239
chr10	34249558	34250350	L1_Mur3	-	chr10	34249801	34249802
chr10	37247824	37248001	L1MB7	-	chr10	37247985	37247986
chr10	37257714	37257828	L2c	+	chr10	37257817	37257818
chr10	37279311	37279549	MTE2a	-	chr10	37279377	37279378
chr10	37342032	37342610	Lx8	-	chr10	37342582	37342583
chr10	37799282	37799582	L2c	+	chr10	37799442	37799443
chr10	38659196	38659544	RLTR30B_MM	-	chr10	38659443	38659444
chr10	39413430	39413631	L1M3	-	chr10	39413527	39413528
chr10	39492373	39492621	L1M5	-	chr10	39492398	39492399
chr10	39777047	39777240	B2_Mm2	-	chr10	39777144	39777145
chr10	39955339	39956069	MER34B-int	+	chr10	39955466	39955467
chr10	40018932	40019529	MER57-int	+	chr10	40019424	40019425
chr10	40097232	40098155	MTD-int	+	chr10	40097619	40097620
chr10	40098539	40098659	RSINE1	-	chr10	40098610	40098611
chr10	40152562	40152625	B4	+	chr10	40152598	40152599
chr10	40171557	40171913	BGLII	-	chr10	40171813	40171814
chr10	40212192	40212367	B2_Mm2	-	chr10	40212335	40212336
chr10	40370329	40370480	B2_Mm2	-	chr10	40370344	40370345
chr10	40529729	40529885	B3	+	chr10	40529776	40529777
chr10	41505717	41505845	B2_Mm2	-	chr10	41505756	41505757
chr10	41570955	41571656	L2	+	chr10	41571150	41571151
chr10	41862001	41862185	B2_Mm2	+	chr10	41862042	41862043
chr10	42298031	42298239	B2_Mm2	+	chr10	42298061	42298062
chr10	42501728	42501768	B4	-	chr10	42501745	42501746
chr10	42713049	42713431	RLTR24B_MM	+	chr10	42713130	42713131
chr10	42779719	42779842	B3	+	chr10	42779787	42779788
chr10	43392140	43392327	L1M5	-	chr10	43392257	43392258
chr10	43758431	43758519	MER21B	+	chr10	43758472	43758473
chr10	43790471	43790924	RLTR30C_MM	-	chr10	43790824	43790825
chr10	43856241	43856670	RLTR28B	-	chr10	43856578	43856579
chr10	43996200	43996269	ID2	+	chr10	43996226	43996227
chr10	44657441	44657712	MER121	+	chr10	44657533	44657534
chr10	44728881	44729311	L4_C_Mam	+	chr10	44729177	44729178
chr10	44842253	44842431	B2_Mm2	-	chr10	44842382	44842383
chr10	45204746	45205110	L1_Mur3	-	chr10	45204758	45204759
chr10	45255873	45256318	RLTR30B_MM	-	chr10	45256220	45256221
chr10	45815371	45816092	RMER19B2	-	chr10	45816017	45816018
chr10	50607244	50607414	B2_Mm2	-	chr10	50607345	50607346
chr10	50690399	50690625	MTB_Mm	-	chr10	50690510	50690511
chr10	50702462	50702733	MTD	+	chr10	50702522	50702523
chr10	50852713	50853181	Lx3C	+	chr10	50852995	50852996
chr10	51422259	51423355	RLTR13D3	-	chr10	51422768	51422769
chr10	51454443	51454783	RMER15	+	chr10	51454583	51454584
chr10	51496821	51496991	Lx8	+	chr10	51496986	51496987
chr10	51520090	51520290	Lx9	+	chr10	51520207	51520208
chr10	51526260	51526514	LTRIS2	+	chr10	51526316	51526317
chr10	51527994	51528041	RLTR1B-int	+	chr10	51528019	51528020
chr10	51528809	51531001	MMERGLN-int	+	chr10	51529144	51529145
chr10	51530980	51531185	LTRIS2	+	chr10	51531021	51531022
chr10	53374000	53374605	L2a	+	chr10	53374603	53374604
chr10	53417105	53417279	LTR16E1	+	chr10	53417217	53417218
chr10	54117839	54117908	B3	-	chr10	54117903	54117904
chr10	54119099	54120199	L2a	+	chr10	54119493	54119494
chr10	56106784	56106934	RMER15	+	chr10	56106810	56106811
chr10	56795405	56795655	ORR1G	-	chr10	56795408	56795409
chr10	56852477	56852806	ORR1E	-	chr10	56852724	56852725
chr10	57517696	57517822	B1_Mus1	-	chr10	57517717	57517718
chr10	57747880	57748319	RLTR24	-	chr10	57748196	57748197
chr10	57760498	57761361	L2	+	chr10	57760924	57760925
chr10	58331844	58332081	RMER15	-	chr10	58331856	58331857
chr10	58405917	58406248	ORR1E	+	chr10	58406076	58406077
chr10	58495757	58495934	B2_Mm2	-	chr10	58495862	58495863
chr10	58548842	58549020	B3A	+	chr10	58548935	58548936
chr10	59340109	59340300	B2_Mm2	+	chr10	59340134	59340135
chr10	60033627	60033799	B2_Mm2	-	chr10	60033719	60033720
chr10	60082442	60082822	ORR1F	+	chr10	60082643	60082644
chr10	60282716	60282784	L1MD3	-	chr10	60282743	60282744
chr10	60296993	60297029	PB1D9	-	chr10	60297002	60297003
chr10	60958128	60958345	ORR1G	-	chr10	60958320	60958321
chr10	61151409	61151602	B2_Mm2	-	chr10	61151525	61151526
chr10	61623895	61624030	B2_Mm2	+	chr10	61623941	61623942
chr10	61675995	61676511	RLTR30E_MM	+	chr10	61676110	61676111
chr10	61681853	61682036	B2_Mm2	-	chr10	61681959	61681960
chr10	61794858	61795046	ID_B1	+	chr10	61795041	61795042
chr10	61794926	61795062	ORR1B1-int	+	chr10	61795041	61795042
chr10	62066822	62067132	ORR1A2	+	chr10	62067116	62067117
chr10	62326056	62326202	B4	+	chr10	62326178	62326179
chr10	62326085	62326206	B1_Mur2	+	chr10	62326178	62326179
chr10	62386540	62386725	B2_Mm2	+	chr10	62386586	62386587
chr10	62503253	62503443	B2_Mm2	+	chr10	62503274	62503275
chr10	62509089	62509488	MTE2a	+	chr10	62509379	62509380
chr10	62543076	62543494	MTC	+	chr10	62543376	62543377
chr10	62556305	62556495	B3	+	chr10	62556411	62556412
chr10	62752108	62752268	B2_Mm2	+	chr10	62752172	62752173
chr10	62974998	62975161	B2_Mm2	+	chr10	62975027	62975028
chr10	63008277	63008460	B2_Mm2	+	chr10	63008345	63008346
chr10	63244876	63245059	B3	-	chr10	63244989	63244990
chr10	63281664	63281773	L1M4c	-	chr10	63281757	63281758
chr10	63417034	63417358	MTD	+	chr10	63417310	63417311
chr10	66852613	66852838	MLTR14	-	chr10	66852802	66852803
chr10	66918124	66918299	B2_Mm2	-	chr10	66918220	66918221
chr10	66920344	66920383	IAPEY5_I-int	-	chr10	66920371	66920372
chr10	66998696	66999122	LTR16D2	+	chr10	66998976	66998977
chr10	67091351	67091700	MTE2a	+	chr10	67091682	67091683
chr10	67271649	67271853	MTE-int	+	chr10	67271775	67271776
chr10	67430720	67431418	Charlie5	+	chr10	67431032	67431033
chr10	67628988	67629251	MLT1L	+	chr10	67629083	67629084
chr10	67807819	67808176	L2	+	chr10	67807981	67807982
chr10	68063210	68063343	B3	+	chr10	68063247	68063248
chr10	68085765	68085952	L2b	+	chr10	68085826	68085827
chr10	68204103	68204231	ORSL	-	chr10	68204135	68204136
chr10	68377772	68378547	L1MB8	-	chr10	68378341	68378342
chr10	69777341	69777430	LTR90A	+	chr10	69777361	69777362
chr10	70115944	70116793	Lx7	-	chr10	70116652	70116653
chr10	70163464	70163802	L2b	+	chr10	70163772	70163773
chr10	70200114	70200306	B2_Mm2	+	chr10	70200188	70200189
chr10	71346834	71347030	B2_Mm2	+	chr10	71346868	71346869
chr10	74919219	74919690	RLTR30E_MM	-	chr10	74919592	74919593
chr10	75041600	75041665	MIRb	+	chr10	75041635	75041636
chr10	75443159	75443333	B2_Mm2	-	chr10	75443257	75443258
chr10	75491868	75492319	RMER6B	-	chr10	75492140	75492141
chr10	75566850	75567057	B2_Mm2	-	chr10	75566963	75566964
chr10	75883866	75884058	B2_Mm2	+	chr10	75883941	75883942
chr10	76290119	76290481	MTD	+	chr10	76290394	76290395
chr10	76351954	76352309	ORR1E	+	chr10	76352083	76352084
chr10	77282216	77282401	B2_Mm2	-	chr10	77282326	77282327
chr10	77536681	77537058	MTD	+	chr10	77536985	77536986
chr10	77623199	77623432	MLT1E2	+	chr10	77623296	77623297
chr10	77626681	77626918	L1ME3G	-	chr10	77626870	77626871
chr10	77728398	77728581	B2_Mm2	-	chr10	77728503	77728504
chr10	77753571	77753750	B2_Mm2	+	chr10	77753616	77753617
chr10	78015236	78015723	HAL1	-	chr10	78015616	78015617
chr10	78017824	78018008	B2_Mm2	+	chr10	78017851	78017852
chr10	78031040	78031187	B1_Mus1	+	chr10	78031052	78031053
chr10	78105248	78105934	L1M3	+	chr10	78105691	78105692
chr10	78226991	78227197	B3	+	chr10	78227040	78227041
chr10	78420062	78420236	B2_Mm2	+	chr10	78420100	78420101
chr10	78476991	78477122	MLT1A	+	chr10	78477066	78477067
chr10	79747746	79747910	B2_Mm2	-	chr10	79747840	79747841
chr10	79817218	79817403	B2_Mm2	+	chr10	79817294	79817295
chr10	79925930	79925945	RSINE1	+	chr10	79925930	79925931
chr10	80223151	80223484	RLTR13D4	+	chr10	80223320	80223321
chr10	80509620	80509669	MTE2a	+	chr10	80509660	80509661
chr10	80653570	80653719	B2_Mm2	-	chr10	80653646	80653647
chr10	80700531	80700644	MT2B2	-	chr10	80700641	80700642
chr10	80750227	80750407	B2_Mm2	-	chr10	80750376	80750377
chr10	80751602	80751888	MLT2D	-	chr10	80751648	80751649
chr10	80763587	80763727	RMER15	-	chr10	80763669	80763670
chr10	80818054	80818242	B2_Mm1t	+	chr10	80818129	80818130
chr10	80822074	80822233	B2_Mm2	-	chr10	80822187	80822188
chr10	80991134	80991308	B2_Mm2	+	chr10	80991162	80991163
chr10	81298621	81298940	L1M4	-	chr10	81298894	81298895
chr10	81445547	81445729	B2_Mm2	-	chr10	81445693	81445694
chr10	82706893	82707096	B3A	-	chr10	82707057	82707058
chr10	82923602	82923731	MTEa	+	chr10	82923701	82923702
chr10	82958510	82958986	MLTR14	+	chr10	82958629	82958630
chr10	83168465	83168772	MLT1D	-	chr10	83168500	83168501
chr10	83343246	83343458	B4	+	chr10	83343317	83343318
chr10	83375690	83376576	RLTR13B1	-	chr10	83376089	83376090
chr10	84972674	84972847	B2_Mm2	-	chr10	84972774	84972775
chr10	85960990	85961436	ORR1E	+	chr10	85961218	85961219
chr10	86918332	86918499	B2_Mm2	-	chr10	86918443	86918444
chr10	87722205	87722498	MLT2F	+	chr10	87722467	87722468
chr10	87754296	87755024	Lx6	-	chr10	87754368	87754369
chr10	87842209	87842928	Lx8	-	chr10	87842739	87842740
chr10	87961021	87961167	L1M4	-	chr10	87961068	87961069
chr10	88306361	88306533	B2_Mm2	+	chr10	88306391	88306392
chr10	88371975	88372088	B3	+	chr10	88372038	88372039
chr10	88513601	88514063	RLTR30B_MM	+	chr10	88513672	88513673
chr10	89696384	89696579	B2_Mm2	+	chr10	89696435	89696436
chr10	89744437	89744565	RSINE1	-	chr10	89744493	89744494
chr10	91060858	91061256	MER21B	+	chr10	91060999	91061000
chr10	91065368	91065779	L1M2c	-	chr10	91065544	91065545
chr10	91076995	91077131	MLT1D	+	chr10	91077118	91077119
chr10	91079712	91079840	B2_Mm2	+	chr10	91079722	91079723
chr10	91137323	91137471	B1_Mm	+	chr10	91137431	91137432
chr10	91180398	91180509	L2	+	chr10	91180421	91180422
chr10	91210107	91210301	MTD	-	chr10	91210223	91210224
chr10	91232334	91232512	B2_Mm2	+	chr10	91232405	91232406
chr10	91273654	91273876	RLTR30E_MM	-	chr10	91273741	91273742
chr10	91300178	91300725	MER89	+	chr10	91300288	91300289
chr10	93033317	93033516	B2_Mm2	-	chr10	93033446	93033447
chr10	93070619	93070807	B3	-	chr10	93070768	93070769
chr10	93175214	93175829	L1MC3	+	chr10	93175456	93175457
chr10	93177672	93178102	MER110A	-	chr10	93178069	93178070
chr10	93268521	93268671	L1M4	+	chr10	93268538	93268539
chr10	93541025	93541190	Lx9	-	chr10	93541040	93541041
chr10	93572377	93572556	B2_Mm2	-	chr10	93572489	93572490
chr10	93949884	93950331	RLTR30C_MM	-	chr10	93950227	93950228
chr10	94013309	94013484	B3	-	chr10	94013403	94013404
chr10	95151114	95151446	MTEb	+	chr10	95151251	95151252
chr10	95300343	95300646	ORR1E	+	chr10	95300410	95300411
chr10	95367389	95368063	L1_Mur3	+	chr10	95367989	95367990
chr10	95557412	95557584	B2_Mm2	-	chr10	95557505	95557506
chr10	95677694	95677980	Tigger12	+	chr10	95677728	95677729
chr10	95680434	95680780	MER21C	+	chr10	95680463	95680464
chr10	96016233	96016640	BGLII_Mus	+	chr10	96016366	96016367
chr10	96181414	96181698	L2c	-	chr10	96181561	96181562
chr10	96182785	96183214	L1_Rod	+	chr10	96182833	96182834
chr10	96201243	96201384	MIR	+	chr10	96201372	96201373
chr10	96254448	96254778	MLT1J2	-	chr10	96254460	96254461
chr10	96291599	96292085	MLT1D	+	chr10	96291920	96291921
chr10	96294665	96295172	MLTR14	+	chr10	96294843	96294844
chr10	96328485	96328803	ORR1D2	-	chr10	96328618	96328619
chr10	96332929	96333011	MIR1_Amn	-	chr10	96332997	96332998
chr10	96374314	96374772	L1MCa	+	chr10	96374738	96374739
chr10	96438445	96438761	MER45B	+	chr10	96438727	96438728
chr10	96589986	96590270	MLT1C2	-	chr10	96590018	96590019
chr10	98880454	98881137	L2a	+	chr10	98880876	98880877
chr10	99081715	99082156	ERVL-E-int	+	chr10	99081751	99081752
chr10	99190924	99191074	B3	-	chr10	99190987	99190988
chr10	99247728	99248013	L1M2c	-	chr10	99247827	99247828
chr10	99393657	99393866	Tigger19b	+	chr10	99393767	99393768
chr10	101104192	101104378	B2_Mm2	-	chr10	101104305	101104306
chr10	104402772	104402961	B2_Mm2	-	chr10	104402876	104402877
chr10	107952455	107952854	LTR109A2	-	chr10	107952704	107952705
chr10	108991471	108991955	RLTR30E_MM	+	chr10	108991538	108991539
chr10	110793594	110793907	MLT1I	+	chr10	110793648	110793649
chr10	111107477	111107660	B3	-	chr10	111107581	111107582
chr10	111119328	111119560	L2	+	chr10	111119424	111119425
chr10	111127559	111127744	MIR	-	chr10	111127603	111127604
chr10	111190029	111190155	ID_B1	-	chr10	111190129	111190130
chr10	111232431	111232786	RMER17C2	+	chr10	111232590	111232591
chr10	111257341	111257618	B4	-	chr10	111257562	111257563
chr10	111392912	111393080	Lx10	-	chr10	111393025	111393026
chr10	111564150	111564577	RMER10A	-	chr10	111564386	111564387
chr10	111619975	111620397	L2	-	chr10	111620033	111620034
chr10	115160317	115160480	B2_Mm2	+	chr10	115160368	115160369
chr10	115178123	115178304	B2_Mm2	-	chr10	115178221	115178222
chr10	115318447	115318624	B2_Mm2	+	chr10	115318490	115318491
chr10	115326849	115326952	RSINE1	+	chr10	115326941	115326942
chr10	115328411	115328858	MER70B	-	chr10	115328774	115328775
chr10	116481100	116481287	B2_Mm2	-	chr10	116481241	116481242
chr10	116531203	116531389	B2_Mm2	-	chr10	116531322	116531323
chr10	116944260	116944439	B2_Mm2	-	chr10	116944356	116944357
chr10	117081811	117081945	B1_Mm	+	chr10	117081891	117081892
chr10	117363199	117363389	B2_Mm2	-	chr10	117363301	117363302
chr10	117366916	117367095	B3	+	chr10	117366981	117366982
chr10	117682639	117682780	B3	+	chr10	117682730	117682731
chr10	117692263	117692441	B2_Mm2	+	chr10	117692333	117692334
chr10	117715162	117715430	RLTR30D_MM	+	chr10	117715316	117715317
chr10	117719896	117719993	PB1D11	+	chr10	117719987	117719988
chr10	117836457	117836648	B3A	+	chr10	117836500	117836501
chr10	118011871	118012165	L2d	-	chr10	118012035	118012036
chr10	118130970	118131126	B2_Mm2	+	chr10	118131033	118131034
chr10	118599637	118600116	L1MB7	-	chr10	118599800	118599801
chr10	119037867	119038427	MER34A	+	chr10	119038006	119038007
chr10	120111725	120111904	B2_Mm2	+	chr10	120111781	120111782
chr10	120140828	120141323	MLT1D	+	chr10	120141291	120141292
chr10	120270882	120271099	B3	+	chr10	120270969	120270970
chr10	120618440	120618995	ORR1C2	+	chr10	120618969	120618970
chr10	120808346	120808502	L1M3	-	chr10	120808417	120808418
chr10	121360452	121360637	B2_Mm2	+	chr10	121360519	121360520
chr10	121585181	121585320	RSINE1	+	chr10	121585285	121585286
chr10	121689342	121689520	B2_Mm2	-	chr10	121689516	121689517
chr10	121902665	121902868	MTD	-	chr10	121902863	121902864
chr10	121907982	121908399	MTE2a	-	chr10	121908054	121908055
chr10	122792599	122792786	B2_Mm2	-	chr10	122792717	122792718
chr10	123057179	123057353	B2_Mm2	+	chr10	123057253	123057254
chr10	123085357	123085744	RLTR4_MM-int	-	chr10	123085513	123085514
chr10	123101471	123101725	L1M4a1	-	chr10	123101483	123101484
chr10	123121092	123121278	B2_Mm2	+	chr10	123121143	123121144
chr10	125370053	125370389	ORR1D2	+	chr10	125370239	125370240
chr10	125745053	125745198	B4	+	chr10	125745102	125745103
chr10	126813290	126813460	B2_Mm2	+	chr10	126813340	126813341
chr10	127066402	127066590	B2_Mm2	-	chr10	127066524	127066525
chr10	127115149	127115339	B2_Mm2	-	chr10	127115262	127115263
chr10	127127852	127128685	L1MC5a	+	chr10	127128102	127128103
chr10	127134553	127134723	B2_Mm2	-	chr10	127134650	127134651
chr10	127218155	127218663	RLTR31C_MM	-	chr10	127218588	127218589
chr10	127407204	127407324	MIR	-	chr10	127407313	127407314
chr10	127561235	127561424	B2_Mm2	+	chr10	127561310	127561311
chr10	127623621	127623773	B2_Mm2	-	chr10	127623699	127623700
chr10	127635659	127635836	B2_Mm2	-	chr10	127635802	127635803
chr10	127671613	127671788	B2_Mm2	-	chr10	127671722	127671723
chr10	127674848	127674900	B3A	-	chr10	127674886	127674887
chr10	127683755	127683939	B2_Mm2	-	chr10	127683865	127683866
chr10	127953882	127954071	B2_Mm2	+	chr10	127953924	127953925
chr10	128026089	128026274	B2_Mm2	+	chr10	128026159	128026160
chr10	128056810	128056890	B3	-	chr10	128056847	128056848
chr10	128057735	128057920	B3	+	chr10	128057803	128057804
chr10	128080623	128080813	B2_Mm2	+	chr10	128080705	128080706
chr10	128098565	128098734	B2_Mm2	-	chr10	128098646	128098647
chr10	128265766	128265935	B2_Mm2	+	chr10	128265835	128265836
chr10	128327729	128327915	B2_Mm2	-	chr10	128327872	128327873
chr10	128417506	128417607	B2_Mm2	+	chr10	128417563	128417564
chr10	128528129	128528317	B2_Mm2	-	chr10	128528265	128528266
chr10	128535783	128535891	ORR1C2	+	chr10	128535866	128535867
chr10	128823190	128823380	B2_Mm2	+	chr10	128823265	128823266
chr10	128902352	128902554	B3	-	chr10	128902477	128902478
chr10	130313653	130313758	RSINE1	+	chr10	130313757	130313758
chr11	3105488	3111982	IAPLTR3-int	+	chr11	3105634	3105635
chr11	3221719	3221877	B2_Mm2	+	chr11	3221763	3221764
chr11	3442116	3442325	B3	-	chr11	3442260	3442261
chr11	3456470	3456667	B3	-	chr11	3456584	3456585
chr11	4202421	4202617	B3	-	chr11	4202535	4202536
chr11	4438170	4438416	L2	+	chr11	4438349	4438350
chr11	4460443	4460862	RMER21B	-	chr11	4460860	4460861
chr11	4532931	4533058	L1MB7	+	chr11	4532978	4532979
chr11	4535857	4536428	L1ME1	+	chr11	4536088	4536089
chr11	4536797	4536899	PB1D10	-	chr11	4536863	4536864
chr11	4544972	4545154	B2_Mm1t	+	chr11	4545095	4545096
chr11	4826593	4826966	L2c	-	chr11	4826861	4826862
chr11	4962155	4962319	B3A	-	chr11	4962220	4962221
chr11	5182861	5183053	RLTR20A4	-	chr11	5182925	5182926
chr11	5219123	5219341	MLT1D	-	chr11	5219203	5219204
chr11	5374324	5374469	B2_Mm2	-	chr11	5374386	5374387
chr11	5560401	5560596	B2_Mm2	-	chr11	5560511	5560512
chr11	5653102	5656148	L1MdMus_II	+	chr11	5654125	5654126
chr11	6184127	6184442	L1ME4b	+	chr11	6184291	6184292
chr11	6299698	6299807	B3	+	chr11	6299729	6299730
chr11	6392366	6393218	L1MD1	-	chr11	6392972	6392973
chr11	6463599	6463685	B3	-	chr11	6463673	6463674
chr11	6524331	6524502	B2_Mm2	-	chr11	6524425	6524426
chr11	6525601	6525786	B2_Mm2	-	chr11	6525719	6525720
chr11	6549090	6549264	B2_Mm2	-	chr11	6549182	6549183
chr11	6560479	6560623	MIR3	-	chr11	6560517	6560518
chr11	8618601	8619003	L1MEc	+	chr11	8618704	8618705
chr11	8759886	8760107	ORR1D2	+	chr11	8760074	8760075
chr11	9055576	9055747	Lx7	+	chr11	9055673	9055674
chr11	9161287	9161662	RLTR9A4	-	chr11	9161499	9161500
chr11	11547941	11548201	UCON26	-	chr11	11548044	11548045
chr11	11558824	11558928	L2a	-	chr11	11558892	11558893
chr11	11724670	11724766	PB1D10	+	chr11	11724677	11724678
chr11	11765078	11765534	HAL1b	-	chr11	11765243	11765244
chr11	16969778	16969851	MTD	+	chr11	16969807	16969808
chr11	16999483	16999757	Lx8	+	chr11	16999588	16999589
chr11	17000852	17001423	RMER19C	+	chr11	17001107	17001108
chr11	17005057	17005190	RSINE1	+	chr11	17005073	17005074
chr11	19135814	19136016	Lx8b	-	chr11	19135894	19135895
chr11	19985713	19985900	B2_Mm2	+	chr11	19985781	19985782
chr11	20105706	20105847	B2_Mm2	+	chr11	20105770	20105771
chr11	20114203	20114350	B1_Mm	-	chr11	20114230	20114231
chr11	20143826	20144012	B2_Mm2	-	chr11	20143942	20143943
chr11	20145969	20146161	B2_Mm2	+	chr11	20146037	20146038
chr11	20209256	20209435	B2_Mm2	-	chr11	20209357	20209358
chr11	20275167	20275352	B2_Mm2	+	chr11	20275238	20275239
chr11	20468716	20469069	MLT1J	+	chr11	20468813	20468814
chr11	20476709	20476929	B3	+	chr11	20476797	20476798
chr11	20668383	20668575	B2_Mm2	-	chr11	20668504	20668505
chr11	21048724	21048892	RLTR15	+	chr11	21048886	21048887
chr11	21096588	21097079	Lx8	+	chr11	21096595	21096596
chr11	21114384	21115464	L1MB7	-	chr11	21114696	21114697
chr11	21225022	21225293	L2b	+	chr11	21225181	21225182
chr11	22506079	22506481	RLTR23	+	chr11	22506147	22506148
chr11	22532026	22533893	Lx	+	chr11	22533081	22533082
chr11	22653155	22653326	B3	+	chr11	22653181	22653182
chr11	22842671	22842737	MIR1_Amn	-	chr11	22842677	22842678
chr11	22850140	22850310	ID_B1	+	chr11	22850308	22850309
chr11	23194219	23198581	L1MdFanc_I	+	chr11	23194478	23194479
chr11	23865241	23865425	B2_Mm2	-	chr11	23865352	23865353
chr11	24357495	24357767	L1MEg	-	chr11	24357551	24357552
chr11	26128870	26129305	BGLII	-	chr11	26129205	26129206
chr11	26183270	26183459	B2_Mm2	+	chr11	26183343	26183344
chr11	26451921	26452943	Lx8	+	chr11	26452817	26452818
chr11	26536840	26537095	Lx8	-	chr11	26536947	26536948
chr11	26601823	26602038	MER34A	-	chr11	26601909	26601910
chr11	26604276	26604547	MTEa	-	chr11	26604451	26604452
chr11	29474727	29474946	B3A	-	chr11	29474859	29474860
chr11	29579736	29579915	B3	-	chr11	29579834	29579835
chr11	29653530	29653687	BGLII	+	chr11	29653667	29653668
chr11	29709621	29709818	B2_Mm2	-	chr11	29709750	29709751
chr11	29874832	29875275	RMER16	+	chr11	29874922	29874923
chr11	29986617	29989875	L1Lx_IV	+	chr11	29987207	29987208
chr11	30016297	30016724	RLTR14-int	+	chr11	30016310	30016311
chr11	30224684	30224866	B3A	+	chr11	30224717	30224718
chr11	31483958	31484195	MER70B	-	chr11	31484056	31484057
chr11	31735917	31736282	MTD	-	chr11	31736269	31736270
chr11	31825984	31826186	B3	-	chr11	31826103	31826104
chr11	32358455	32358622	MIR	+	chr11	32358545	32358546
chr11	32369639	32369824	B2_Mm1t	-	chr11	32369761	32369762
chr11	32489319	32489518	ID_B1	+	chr11	32489512	32489513
chr11	32605777	32605957	B2_Mm2	+	chr11	32605840	32605841
chr11	32607121	32607342	B3	+	chr11	32607198	32607199
chr11	33660469	33660749	MER102c	+	chr11	33660666	33660667
chr11	33794080	33794277	B2_Mm2	-	chr11	33794230	33794231
chr11	34026802	34027191	MTB	-	chr11	34026939	34026940
chr11	34033800	34034175	MTE2a	+	chr11	34034088	34034089
chr11	34066544	34066911	ORR1F	-	chr11	34066851	34066852
chr11	34094647	34094818	B2_Mm2	-	chr11	34094748	34094749
chr11	34427259	34427455	RLTR45-int	-	chr11	34427291	34427292
chr11	34694780	34694998	MTD	+	chr11	34694893	34694894
chr11	34736999	34737584	L1_Mur3	+	chr11	34737288	34737289
chr11	34738344	34738524	B2_Mm2	+	chr11	34738362	34738363
chr11	43405658	43406139	MER34B-int	+	chr11	43405714	43405715
chr11	44414983	44415281	MTD	-	chr11	44415150	44415151
chr11	44478477	44478677	MER68	-	chr11	44478630	44478631
chr11	46372427	46373340	L1MA4A	+	chr11	46373279	46373280
chr11	46585522	46585631	PB1D10	+	chr11	46585614	46585615
chr11	48777723	48777894	B2_Mm2	+	chr11	48777742	48777743
chr11	48781523	48781710	B2_Mm2	+	chr11	48781596	48781597
chr11	48787845	48788056	ORR1E	+	chr11	48788042	48788043
chr11	48868161	48868338	B2_Mm2	-	chr11	48868301	48868302
chr11	48900952	48901077	RMER15-int	+	chr11	48901024	48901025
chr11	48926207	48926490	L1MEj	+	chr11	48926401	48926402
chr11	49084509	49084648	B1_Mur2	+	chr11	49084542	49084543
chr11	49238089	49238926	L1_Mur3	-	chr11	49238092	49238093
chr11	49719791	49720063	ORR1F	-	chr11	49720038	49720039
chr11	49749078	49749264	RLTR25A	-	chr11	49749239	49749240
chr11	49983940	49984161	L1M4b	+	chr11	49984045	49984046
chr11	50133998	50134553	Arthur1	+	chr11	50134410	50134411
chr11	50277162	50277346	B3	-	chr11	50277247	50277248
chr11	51285532	51285690	B3	-	chr11	51285610	51285611
chr11	51367303	51367493	MLT1C	+	chr11	51367431	51367432
chr11	51563738	51563906	B3	+	chr11	51563781	51563782
chr11	51698113	51698267	B2_Mm2	-	chr11	51698224	51698225
chr11	51713241	51713428	B2_Mm2	-	chr11	51713350	51713351
chr11	51889538	51890423	RMER19B	-	chr11	51889756	51889757
chr11	51911544	51911955	L1M4	+	chr11	51911714	51911715
chr11	51931686	51932049	Lx8	-	chr11	51931932	51931933
chr11	52002996	52003188	B2_Mm2	-	chr11	52003092	52003093
chr11	52005748	52005915	B3A	+	chr11	52005798	52005799
chr11	53346296	53346478	B2_Mm2	-	chr11	53346439	53346440
chr11	53532466	53532654	B2_Mm2	-	chr11	53532550	53532551
chr11	53563183	53563367	RMER19B2	-	chr11	53563259	53563260
chr11	54149845	54150123	L2	-	chr11	54149965	54149966
chr11	54491964	54492761	L1MB3	-	chr11	54492219	54492220
chr11	54533857	54534206	RLTR14	-	chr11	54534080	54534081
chr11	54562900	54563031	ID_B1	+	chr11	54562971	54562972
chr11	54617619	54617954	MLT1A0	-	chr11	54617749	54617750
chr11	54619075	54619547	Lx8	-	chr11	54619079	54619080
chr11	54630109	54630301	B4A	+	chr11	54630174	54630175
chr11	54807822	54807964	L1M7	+	chr11	54807848	54807849
chr11	54879030	54879167	B4A	+	chr11	54879090	54879091
chr11	54884618	54884731	B4	-	chr11	54884647	54884648
chr11	55013180	55013285	B4	+	chr11	55013264	55013265
chr11	55013204	55013381	B2_Mm2	+	chr11	55013264	55013265
chr11	55154574	55154989	MTC	+	chr11	55154960	55154961
chr11	58179831	58179933	L1M2	-	chr11	58179838	58179839
chr11	58190050	58190291	B3A	+	chr11	58190110	58190111
chr11	58190639	58190990	L1ME4b	+	chr11	58190858	58190859
chr11	58205519	58205716	B2_Mm2	-	chr11	58205660	58205661
chr11	58211423	58212581	RMER12	-	chr11	58211620	58211621
chr11	58215614	58215742	RSINE1	-	chr11	58215738	58215739
chr11	58224465	58224560	RMER17D2	-	chr11	58224488	58224489
chr11	58350729	58350899	B2_Mm2	+	chr11	58350783	58350784
chr11	58979216	58979445	MER34A	-	chr11	58979377	58979378
chr11	59151573	59151730	B2_Mm2	-	chr11	59151675	59151676
chr11	59354501	59354695	B2_Mm2	+	chr11	59354526	59354527
chr11	59633136	59633529	ORR1D2	+	chr11	59633228	59633229
chr11	60042414	60042598	B2_Mm2	-	chr11	60042525	60042526
chr11	60143213	60143326	MIR3	-	chr11	60143256	60143257
chr11	60474674	60474865	B2_Mm2	-	chr11	60474796	60474797
chr11	60512599	60512792	B2_Mm2	+	chr11	60512657	60512658
chr11	60769331	60769605	MTD	-	chr11	60769498	60769499
chr11	60770000	60770137	MTD	-	chr11	60770126	60770127
chr11	60772304	60772481	B2_Mm2	+	chr11	60772373	60772374
chr11	60835157	60835459	ORR1C1	-	chr11	60835333	60835334
chr11	60858837	60858970	B1_Mur4	-	chr11	60858838	60858839
chr11	60861312	60861519	B3	-	chr11	60861439	60861440
chr11	60900668	60900837	MTEb	+	chr11	60900753	60900754
chr11	61381363	61381647	ORR1E	+	chr11	61381556	61381557
chr11	62079660	62080038	ERV3-16A3_LTR	-	chr11	62079672	62079673
chr11	62166657	62166936	MLT1A0	-	chr11	62166685	62166686
chr11	62209675	62209842	L1M5	+	chr11	62209831	62209832
chr11	62435563	62435753	B2_Mm2	+	chr11	62435646	62435647
chr11	62732787	62732975	B3A	+	chr11	62732887	62732888
chr11	64654800	64656195	L1MCa	+	chr11	64655382	64655383
chr11	65794652	65795099	L1MB8	-	chr11	65795005	65795006
chr11	67412724	67413201	ORR1F	-	chr11	67413119	67413120
chr11	67417692	67417893	B3	-	chr11	67417863	67417864
chr11	67499771	67500370	ORR1E-int	-	chr11	67499799	67499800
chr11	67564212	67564388	MER113A	-	chr11	67564367	67564368
chr11	67579237	67579601	L1M6	-	chr11	67579335	67579336
chr11	67633696	67633738	RLTR21	+	chr11	67633710	67633711
chr11	67828274	67829011	L1ME1	+	chr11	67828568	67828569
chr11	68478227	68478417	B2_Mm2	-	chr11	68478370	68478371
chr11	68513926	68514482	MurERV4-int	-	chr11	68514135	68514136
chr11	68706605	68707208	Charlie1a	+	chr11	68706671	68706672
chr11	68724202	68724402	B3	+	chr11	68724285	68724286
chr11	68839011	68839188	B2_Mm2	+	chr11	68839086	68839087
chr11	68878410	68878530	B2_Mm2	-	chr11	68878440	68878441
chr11	68939671	68940209	RLTR20B3A_MM	+	chr11	68939802	68939803
chr11	68961766	68961973	B3	+	chr11	68961884	68961885
chr11	69093772	69093953	B2_Mm2	+	chr11	69093846	69093847
chr11	69258284	69259115	Lx8	-	chr11	69258531	69258532
chr11	69534661	69534840	B2_Mm2	-	chr11	69534749	69534750
chr11	69692279	69692746	L2	+	chr11	69692439	69692440
chr11	69698497	69698652	B2_Mm2	-	chr11	69698630	69698631
chr11	69729186	69729369	B3	-	chr11	69729297	69729298
chr11	69751111	69751305	B2_Mm2	-	chr11	69751256	69751257
chr11	69752795	69752970	B3A	-	chr11	69752891	69752892
chr11	69926838	69927010	B2_Mm2	-	chr11	69926927	69926928
chr11	70174873	70174956	Lx8	-	chr11	70174906	70174907
chr11	70185244	70185403	L1M2	-	chr11	70185340	70185341
chr11	70198323	70199004	RLTR19B	+	chr11	70198579	70198580
chr11	70201947	70202131	B3A	-	chr11	70202056	70202057
chr11	70306139	70306483	LTR73	+	chr11	70306429	70306430
chr11	70313942	70314125	B2_Mm2	-	chr11	70314042	70314043
chr11	70372676	70373366	L1MEf	-	chr11	70372687	70372688
chr11	70374303	70374552	L1MEf	+	chr11	70374416	70374417
chr11	70388785	70388953	B2_Mm2	+	chr11	70388841	70388842
chr11	70457279	70457466	B2_Mm2	+	chr11	70457344	70457345
chr11	70595443	70595523	RSINE1	+	chr11	70595491	70595492
chr11	70787136	70788089	MLT-int	+	chr11	70787189	70787190
chr11	70789344	70789495	L2c	-	chr11	70789355	70789356
chr11	70795357	70795742	MTB	+	chr11	70795727	70795728
chr11	70803838	70803943	MIR	-	chr11	70803869	70803870
chr11	70809477	70809723	Charlie20a	+	chr11	70809585	70809586
chr11	71250575	71250999	RMER21A	+	chr11	71250905	71250906
chr11	71251557	71251785	RMER21A	+	chr11	71251648	71251649
chr11	72626379	72626554	B3A	+	chr11	72626505	72626506
chr11	72697364	72697638	ORR1F	-	chr11	72697495	72697496
chr11	72837616	72837729	PB1D7	-	chr11	72837701	72837702
chr11	73003249	73003608	L1ME4b	-	chr11	73003266	73003267
chr11	73051464	73051628	B2_Mm2	-	chr11	73051570	73051571
chr11	73128527	73128649	B1F	+	chr11	73128610	73128611
chr11	73162738	73162925	B2_Mm2	-	chr11	73162851	73162852
chr11	74529917	74530102	B3	+	chr11	74529923	74529924
chr11	74607120	74607246	B2_Mm2	+	chr11	74607160	74607161
chr11	74704337	74704539	B3	-	chr11	74704450	74704451
chr11	74810241	74810426	B2_Mm2	-	chr11	74810359	74810360
chr11	74811106	74811890	RMER17D2	+	chr11	74811132	74811133
chr11	74894615	74894787	B3	-	chr11	74894753	74894754
chr11	75150370	75150536	B2_Mm2	+	chr11	75150447	75150448
chr11	75189383	75189530	B1_Mus1	+	chr11	75189513	75189514
chr11	75325416	75325562	B1_Mur3	+	chr11	75325501	75325502
chr11	75584973	75585156	B2_Mm2	-	chr11	75585112	75585113
chr11	75587607	75587714	MIR	+	chr11	75587702	75587703
chr11	75644938	75645107	MIRb	+	chr11	75644977	75644978
chr11	76772597	76772971	L1MEg	-	chr11	76772603	76772604
chr11	76789389	76789591	B3	-	chr11	76789536	76789537
chr11	76900092	76900448	LTR16C	+	chr11	76900169	76900170
chr11	76973718	76973909	B2_Mm2	-	chr11	76973841	76973842
chr11	77451251	77451382	B1_Mus1	-	chr11	77451376	77451377
chr11	77451262	77451421	ORR1B1-int	-	chr11	77451376	77451377
chr11	77558720	77558909	B2_Mm2	+	chr11	77558782	77558783
chr11	77673553	77673718	B2_Mm2	-	chr11	77673643	77673644
chr11	77697378	77697567	B2_Mm2	-	chr11	77697498	77697499
chr11	78040971	78041151	B2_Mm2	+	chr11	78041026	78041027
chr11	78064912	78065111	B2_Mm2	-	chr11	78065047	78065048
chr11	78475362	78475677	ORR1F	+	chr11	78475428	78475429
chr11	78586239	78586365	B2_Mm2	-	chr11	78586351	78586352
chr11	78884805	78884988	B2_Mm2	+	chr11	78884870	78884871
chr11	79252287	79252554	L3	-	chr11	79252461	79252462
chr11	79258758	79259062	ORR1E	-	chr11	79259003	79259004
chr11	79707223	79707388	B2_Mm2	-	chr11	79707304	79707305
chr11	79867700	79867883	B2_Mm2	-	chr11	79867804	79867805
chr11	80009198	80009367	B2_Mm2	-	chr11	80009301	80009302
chr11	80061777	80061961	B2_Mm1t	+	chr11	80061843	80061844
chr11	80098510	80098900	BGLII_Mus	-	chr11	80098812	80098813
chr11	80146617	80146722	PB1D10	+	chr11	80146704	80146705
chr11	80160777	80160962	B2_Mm2	-	chr11	80160898	80160899
chr11	80169738	80169942	B3	+	chr11	80169791	80169792
chr11	80185032	80185412	RLTR30D_MM	-	chr11	80185348	80185349
chr11	80186730	80187232	RLTR30C_MM	-	chr11	80187110	80187111
chr11	80216671	80217160	MER21C	-	chr11	80217107	80217108
chr11	80364334	80364527	B2_Mm2	+	chr11	80364423	80364424
chr11	80575058	80575139	B2_Mm2	-	chr11	80575095	80575096
chr11	80659543	80659746	B2_Mm1t	-	chr11	80659698	80659699
chr11	81622877	81623028	LTR78	-	chr11	81622928	81622929
chr11	82041482	82042213	L1MA6	-	chr11	82041764	82041765
chr11	82092137	82092904	RMER6A	+	chr11	82092437	82092438
chr11	82098555	82100262	L1MB2	+	chr11	82099354	82099355
chr11	82100284	82100395	L1MC	+	chr11	82100357	82100358
chr11	82171823	82172236	L1M5	-	chr11	82171900	82171901
chr11	82174212	82174823	MT2B	+	chr11	82174319	82174320
chr11	82761240	82761412	B2_Mm2	+	chr11	82761314	82761315
chr11	82886632	82886812	B2_Mm2	+	chr11	82886711	82886712
chr11	82949269	82949395	MLT1E2	-	chr11	82949340	82949341
chr11	82958909	82959005	B3	+	chr11	82959002	82959003
chr11	83039171	83039355	B2_Mm2	-	chr11	83039287	83039288
chr11	83045776	83046479	MMERVK10D3_I-int	+	chr11	83045817	83045818
chr11	83063207	83063277	MRLTR33	-	chr11	83063238	83063239
chr11	83079413	83079781	RLTR30D2_MM	+	chr11	83079527	83079528
chr11	83115511	83115707	Lx8	-	chr11	83115623	83115624
chr11	83191262	83191545	RLTR12BD_Mm	+	chr11	83191311	83191312
chr11	83509168	83509584	BGLII_Mus	-	chr11	83509235	83509236
chr11	83619104	83619308	Lx8	-	chr11	83619243	83619244
chr11	83635012	83635177	B2_Mm2	-	chr11	83635127	83635128
chr11	83657406	83657563	RMER19B2	-	chr11	83657513	83657514
chr11	83666002	83666157	MIR3	-	chr11	83666053	83666054
chr11	83717222	83717561	MER77	-	chr11	83717296	83717297
chr11	83737385	83738214	L1MA5	+	chr11	83737510	83737511
chr11	84128101	84128286	B2_Mm1t	-	chr11	84128203	84128204
chr11	84201707	84201891	B2_Mm1t	-	chr11	84201858	84201859
chr11	84414378	84414586	B3	-	chr11	84414505	84414506
chr11	84554966	84555121	RSINE1	+	chr11	84555041	84555042
chr11	84866903	84867049	RSINE1	-	chr11	84866969	84866970
chr11	85164150	85164620	L1MD3	-	chr11	85164610	85164611
chr11	85244517	85244936	BGLII_Mus	-	chr11	85244825	85244826
chr11	85506436	85506576	B4A	-	chr11	85506502	85506503
chr11	85506468	85506582	B1_Mur3	-	chr11	85506502	85506503
chr11	86209157	86209606	RLTR41C	+	chr11	86209299	86209300
chr11	86308334	86308520	B2_Mm2	+	chr11	86308363	86308364
chr11	86479966	86480132	B2_Mm2	+	chr11	86480016	86480017
chr11	86480013	86480348	MT2A	+	chr11	86480016	86480017
chr11	86518152	86518349	B2_Mm2	-	chr11	86518320	86518321
chr11	86540195	86540362	RSINE1	-	chr11	86540275	86540276
chr11	86610285	86610423	RSINE1	-	chr11	86610353	86610354
chr11	86684549	86684896	RLTR24	-	chr11	86684883	86684884
chr11	87383953	87384142	B2_Mm2	+	chr11	87383988	87383989
chr11	87426982	87427061	PB1D9	+	chr11	87427020	87427021
chr11	87433032	87433187	ORR1C2	-	chr11	87433065	87433066
chr11	87967284	87967469	B2_Mm2	+	chr11	87967348	87967349
chr11	87989944	87990068	B3	-	chr11	87990005	87990006
chr11	88467087	88467278	B2_Mm2	+	chr11	88467154	88467155
chr11	88828601	88828763	B2_Mm2	+	chr11	88828671	88828672
chr11	88875189	88875307	B2_Mm2	-	chr11	88875265	88875266
chr11	88954406	88954604	B3	+	chr11	88954455	88954456
chr11	89006738	89006923	B2_Mm2	+	chr11	89006796	89006797
chr11	90282077	90282263	B2_Mm2	-	chr11	90282204	90282205
chr11	93821590	93821938	ORR1F	-	chr11	93821862	93821863
chr11	93950071	93950260	B2_Mm2	-	chr11	93950186	93950187
chr11	94023782	94023970	B2_Mm2	+	chr11	94023873	94023874
chr11	94607623	94607800	B2_Mm2	+	chr11	94607672	94607673
chr11	95066138	95066321	B2_Mm2	+	chr11	95066193	95066194
chr11	95279177	95279348	B2_Mm2	-	chr11	95279274	95279275
chr11	95284292	95284510	B3	-	chr11	95284421	95284422
chr11	95479534	95479713	B2_Mm2	+	chr11	95479621	95479622
chr11	95657741	95658009	HAL1	-	chr11	95657767	95657768
chr11	95668227	95668404	B2_Mm2	-	chr11	95668327	95668328
chr11	95728247	95728425	B2_Mm2	-	chr11	95728413	95728414
chr11	95736608	95738124	L1MdV_III	-	chr11	95737578	95737579
chr11	95898008	95898198	B2_Mm2	+	chr11	95898083	95898084
chr11	95975880	95975993	RSINE1	-	chr11	95975980	95975981
chr11	95978582	95978771	B2_Mm2	+	chr11	95978617	95978618
chr11	96757527	96757712	B3A	-	chr11	96757630	96757631
chr11	96781510	96781687	B2_Mm2	-	chr11	96781629	96781630
chr11	96793812	96794189	RMER6B	+	chr11	96794028	96794029
chr11	96796687	96796856	B2_Mm2	+	chr11	96796756	96796757
chr11	97192673	97192852	B2_Mm2	+	chr11	97192737	97192738
chr11	97198721	97198873	B3	-	chr11	97198822	97198823
chr11	97238408	97238527	B2_Mm2	-	chr11	97238466	97238467
chr11	97266784	97266968	B2_Mm2	+	chr11	97266852	97266853
chr11	97347901	97348093	B2_Mm2	-	chr11	97348007	97348008
chr11	97625595	97625693	MLT1C2	+	chr11	97625649	97625650
chr11	97644918	97645127	B3A	-	chr11	97645024	97645025
chr11	97645502	97645683	B2_Mm2	+	chr11	97645572	97645573
chr11	97651605	97651806	B3	+	chr11	97651656	97651657
chr11	97777161	97777336	B2_Mm2	-	chr11	97777289	97777290
chr11	97793257	97793444	B2_Mm2	-	chr11	97793416	97793417
chr11	97830094	97830180	ORR1E	-	chr11	97830107	97830108
chr11	97830881	97830997	RSINE1	-	chr11	97830936	97830937
chr11	97945914	97946093	MTD	-	chr11	97946057	97946058
chr11	97972761	97972921	B2_Mm2	+	chr11	97972825	97972826
chr11	98168727	98168830	PB1D10	-	chr11	98168829	98168830
chr11	98188294	98188503	B2_Mm1t	+	chr11	98188372	98188373
chr11	98369113	98369294	B3	+	chr11	98369176	98369177
chr11	98660682	98660724	RLTR22_Mus	-	chr11	98660692	98660693
chr11	98858784	98859016	B2_Mm1t	-	chr11	98858951	98858952
chr11	98889328	98889738	MTB_Mm	-	chr11	98889371	98889372
chr11	98948005	98948609	L1MB7	-	chr11	98948144	98948145
chr11	98958648	98958794	B2_Mm2	-	chr11	98958727	98958728
chr11	99040373	99040527	MER91B	-	chr11	99040439	99040440
chr11	99061395	99061578	B2_Mm2	+	chr11	99061442	99061443
chr11	99064638	99064822	B2_Mm2	-	chr11	99064747	99064748
chr11	99244590	99244778	B2_Mm2	+	chr11	99244638	99244639
chr11	100373738	100373912	B2_Mm2	+	chr11	100373790	100373791
chr11	100548496	100548780	ID_B1	+	chr11	100548779	100548780
chr11	100602746	100602914	B2_Mm2	+	chr11	100602815	100602816
chr11	100655300	100655468	ORR1B1-int	-	chr11	100655465	100655466
chr11	100702548	100702730	B2_Mm2	+	chr11	100702658	100702659
chr11	100724682	100724787	PB1D9	+	chr11	100724707	100724708
chr11	100729813	100729958	B1_Mus2	+	chr11	100729845	100729846
chr11	101000860	101001255	RMER10A	+	chr11	101001066	101001067
chr11	101001897	101001966	ID_B1	-	chr11	101001962	101001963
chr11	101042269	101042440	B2_Mm2	+	chr11	101042339	101042340
chr11	101267504	101267680	B2_Mm2	-	chr11	101267644	101267645
chr11	101415330	101415482	B2_Mm2	+	chr11	101415390	101415391
chr11	101513982	101514147	B2_Mm2	+	chr11	101514041	101514042
chr11	101562525	101562694	B2_Mm2	+	chr11	101562592	101562593
chr11	101587725	101588253	RMER19B	+	chr11	101587822	101587823
chr11	101627708	101627786	B2_Mm2	+	chr11	101627782	101627783
chr11	102158155	102158345	B2_Mm2	-	chr11	102158266	102158267
chr11	102299997	102300144	B3	-	chr11	102300069	102300070
chr11	102959024	102959205	B2_Mm2	-	chr11	102959129	102959130
chr11	103007131	103007240	MIRb	+	chr11	103007139	103007140
chr11	103027547	103027849	Lx9	+	chr11	103027736	103027737
chr11	103114664	103114837	MIRc	+	chr11	103114728	103114729
chr11	103146326	103146526	B2_Mm2	+	chr11	103146417	103146418
chr11	103229699	103229881	B2_Mm2	+	chr11	103229712	103229713
chr11	103251224	103251397	B2_Mm2	+	chr11	103251245	103251246
chr11	103399990	103400484	L1ME3	-	chr11	103400216	103400217
chr11	103411499	103411602	PB1D10	+	chr11	103411507	103411508
chr11	103413374	103413671	Lx5c	-	chr11	103413658	103413659
chr11	103442880	103443265	MLTR14	+	chr11	103442955	103442956
chr11	103443347	103444050	RLTR16B_MM	-	chr11	103443999	103444000
chr11	103606709	103607128	BGLII_Mus	+	chr11	103606807	103606808
chr11	103964032	103964186	ORR1F	+	chr11	103964179	103964180
chr11	103975801	103975994	B2_Mm2	+	chr11	103975871	103975872
chr11	103986685	103986901	B3	-	chr11	103986835	103986836
chr11	103992901	103992951	Lx7	-	chr11	103992919	103992920
chr11	104001090	104001324	RLTR42-int	-	chr11	104001241	104001242
chr11	104289494	104289602	MIR3	-	chr11	104289513	104289514
chr11	104317397	104317482	L4_C_Mam	+	chr11	104317444	104317445
chr11	104361684	104362135	RLTR19	+	chr11	104361943	104361944
chr11	104367771	104368217	Lx8b	-	chr11	104367986	104367987
chr11	104386436	104386631	B3	+	chr11	104386516	104386517
chr11	104458569	104458756	B2_Mm2	+	chr11	104458642	104458643
chr11	104531927	104532080	B2_Mm2	+	chr11	104531961	104531962
chr11	104609574	104609659	B4	+	chr11	104609581	104609582
chr11	105190830	105190921	Tigger13a	+	chr11	105190860	105190861
chr11	105420069	105420464	Charlie4a	+	chr11	105420433	105420434
chr11	105844066	105844213	B1_Mm	+	chr11	105844146	105844147
chr11	106093172	106093378	MIRb	-	chr11	106093348	106093349
chr11	106477737	106478059	Lx2B2	-	chr11	106478049	106478050
chr11	106497958	106498127	B2_Mm2	+	chr11	106498031	106498032
chr11	106562819	106563063	ORR1E	+	chr11	106562924	106562925
chr11	106716601	106716932	L2c	+	chr11	106716760	106716761
chr11	107815026	107815331	LTR33A	+	chr11	107815196	107815197
chr11	108416401	108416553	B2_Mm2	+	chr11	108416482	108416483
chr11	108846057	108846235	MER58A	-	chr11	108846163	108846164
chr11	109100238	109100809	L1M2	-	chr11	109100442	109100443
chr11	109214944	109215127	B2_Mm2	+	chr11	109214979	109214980
chr11	109247001	109247446	L1MB8	+	chr11	109247209	109247210
chr11	109344458	109344549	ORR1D2	+	chr11	109344493	109344494
chr11	109393700	109393912	B3	-	chr11	109393777	109393778
chr11	109424434	109424735	L1MC4a	+	chr11	109424712	109424713
chr11	109482743	109482936	B2_Mm2	-	chr11	109482892	109482893
chr11	109654686	109654847	B3	-	chr11	109654755	109654756
chr11	109955285	109955480	B2_Mm2	-	chr11	109955414	109955415
chr11	110954575	110954936	ORR1E	-	chr11	110954652	110954653
chr11	111290448	111290789	Lx9	-	chr11	111290744	111290745
chr11	111435873	111436980	MLT1-int	-	chr11	111436703	111436704
chr11	113050386	113050504	Lx10	-	chr11	113050500	113050501
chr11	113449929	113450258	MTD	-	chr11	113450231	113450232
chr11	113766250	113766498	Charlie8	+	chr11	113766411	113766412
chr11	113815816	113815968	L1M2	-	chr11	113815908	113815909
chr11	114229773	114230179	L4_B_Mam	+	chr11	114229908	114229909
chr11	115051447	115051651	B3	+	chr11	115051524	115051525
chr11	115080395	115080583	B2_Mm2	-	chr11	115080524	115080525
chr11	115089967	115090164	B3A	-	chr11	115090045	115090046
chr11	115119137	115119315	RSINE1	+	chr11	115119219	115119220
chr11	115138977	115139298	MLT1H	+	chr11	115139089	115139090
chr11	115142214	115142281	L4_C_Mam	+	chr11	115142227	115142228
chr11	115142717	115142844	ORR1B1-int	+	chr11	115142802	115142803
chr11	115142778	115142871	PB1D10	+	chr11	115142802	115142803
chr11	115562403	115562578	B2_Mm2	+	chr11	115562459	115562460
chr11	115718115	115718290	B2_Mm2	+	chr11	115718146	115718147
chr11	115930000	115930029	B3A	-	chr11	115930024	115930025
chr11	116020662	116020847	B2_Mm2	-	chr11	116020772	116020773
chr11	116027948	116028058	MIR3	+	chr11	116028015	116028016
chr11	116032233	116032403	B2_Mm2	-	chr11	116032337	116032338
chr11	116071635	116071677	RSINE1	+	chr11	116071645	116071646
chr11	116095628	116095885	EUTREP7	-	chr11	116095700	116095701
chr11	116096828	116097015	B3	+	chr11	116096849	116096850
chr11	116156099	116156276	B2_Mm2	-	chr11	116156205	116156206
chr11	116307388	116307611	B3	-	chr11	116307551	116307552
chr11	116376451	116376630	B2_Mm2	+	chr11	116376499	116376500
chr11	116405713	116405886	B3	+	chr11	116405783	116405784
chr11	116409140	116409290	L1M4	-	chr11	116409263	116409264
chr11	116427710	116427791	L1M2	-	chr11	116427736	116427737
chr11	116488785	116488974	B2_Mm2	+	chr11	116488894	116488895
chr11	116627663	116627908	B3	-	chr11	116627850	116627851
chr11	117036616	117036914	ORR1A2	-	chr11	117036820	117036821
chr11	117125081	117125263	B2_Mm2	-	chr11	117125179	117125180
chr11	117252588	117252902	ORR1E	-	chr11	117252687	117252688
chr11	117847609	117848140	RMER4B	-	chr11	117847656	117847657
chr11	117847609	117848140	RMER4B	-	chr11	117848128	117848129
chr11	117962262	117962339	L2	+	chr11	117962317	117962318
chr11	117977256	117977364	PB1D10	+	chr11	117977256	117977257
chr11	118400647	118401070	MLTR14	+	chr11	118400780	118400781
chr11	118980608	118980727	MT2B2	-	chr11	118980608	118980609
chr11	118980592	118980707	B1_Mur3	-	chr11	118980608	118980609
chr11	119266005	119266177	B2_Mm2	+	chr11	119266067	119266068
chr11	119348742	119348954	B3	+	chr11	119348808	119348809
chr11	119610633	119610810	B2_Mm2	+	chr11	119610725	119610726
chr11	120158278	120158430	B4	+	chr11	120158403	120158404
chr11	120158296	120158434	B1_Mur3	+	chr11	120158403	120158404
chr11	120163293	120163484	B3A	+	chr11	120163365	120163366
chr11	120201597	120201739	B1_Mur4	+	chr11	120201694	120201695
chr11	120208923	120209112	B2_Mm2	+	chr11	120208992	120208993
chr11	120584377	120584565	B2_Mm2	+	chr11	120584452	120584453
chr11	121680923	121681337	MTD	-	chr11	121681007	121681008
chr11	121966020	121966195	B2_Mm2	-	chr11	121966138	121966139
chr12	3190207	3190374	B3	-	chr12	3190260	3190261
chr12	3282850	3283168	Charlie1a	-	chr12	3283052	3283053
chr12	3305339	3305530	B2_Mm2	+	chr12	3305444	3305445
chr12	3408151	3408343	B2_Mm2	-	chr12	3408285	3408286
chr12	3428317	3428499	B2_Mm2	+	chr12	3428394	3428395
chr12	3848972	3849165	B2_Mm2	-	chr12	3849096	3849097
chr12	3875589	3875785	B2_Mm2	-	chr12	3875700	3875701
chr12	3914393	3914503	L1ME4c	-	chr12	3914479	3914480
chr12	4022786	4023291	LTR90A	+	chr12	4022920	4022921
chr12	4539506	4539884	MTD	-	chr12	4539625	4539626
chr12	4545376	4545679	MTC	+	chr12	4545593	4545594
chr12	4581843	4582034	B2_Mm1t	-	chr12	4581966	4581967
chr12	4843867	4843935	B1F2	-	chr12	4843887	4843888
chr12	8231189	8231301	L1MCa	+	chr12	8231219	8231220
chr12	8347443	8347780	MLT1C2	-	chr12	8347641	8347642
chr12	8390839	8391165	RMER6D	+	chr12	8391112	8391113
chr12	8682113	8682477	MTB_Mm	+	chr12	8682201	8682202
chr12	8690316	8690494	B4A	-	chr12	8690424	8690425
chr12	8722161	8722357	B2_Mm2	-	chr12	8722302	8722303
chr12	8956336	8956492	B3A	-	chr12	8956446	8956447
chr12	11276301	11276661	Lx5c	-	chr12	11276546	11276547
chr12	11286551	11286713	B2_Mm2	-	chr12	11286642	11286643
chr12	11326561	11326712	L2c	+	chr12	11326648	11326649
chr12	12164424	12164820	MTB_Mm	-	chr12	12164584	12164585
chr12	12230198	12230642	MLT1D-int	+	chr12	12230269	12230270
chr12	12390762	12392095	ERVL-E-int	-	chr12	12391067	12391068
chr12	16004351	16004757	MTE2a	-	chr12	16004452	16004453
chr12	16908373	16908552	B2_Mm2	+	chr12	16908432	16908433
chr12	17350190	17350348	B2_Mm2	+	chr12	17350256	17350257
chr12	17450689	17450835	B3A	+	chr12	17450707	17450708
chr12	17455193	17455478	L2b	-	chr12	17455319	17455320
chr12	17679385	17679841	MTD	+	chr12	17679710	17679711
chr12	17712794	17712894	Eulor9B	-	chr12	17712870	17712871
chr12	21251862	21251939	MIR1_Amn	-	chr12	21251931	21251932
chr12	21284841	21285031	B2_Mm1t	+	chr12	21284883	21284884
chr12	21318478	21318583	ID_B1	-	chr12	21318508	21318509
chr12	21367067	21367245	B3	+	chr12	21367164	21367165
chr12	24678026	24678207	B2_Mm2	+	chr12	24678079	24678080
chr12	24701724	24701887	B2_Mm2	+	chr12	24701817	24701818
chr12	25339862	25340052	L4_C_Mam	-	chr12	25339907	25339908
chr12	25378193	25378561	MLT1J	-	chr12	25378362	25378363
chr12	28674213	28674404	B2_Mm1t	-	chr12	28674317	28674318
chr12	31507112	31507297	B2_Mm2	-	chr12	31507265	31507266
chr12	31632670	31632822	MIRb	-	chr12	31632801	31632802
chr12	31633991	31634165	RSINE1	-	chr12	31634077	31634078
chr12	32062670	32062832	MLT1J	-	chr12	32062773	32062774
chr12	32111712	32112211	MARE6	-	chr12	32111765	32111766
chr12	32127177	32127475	HAL1	-	chr12	32127288	32127289
chr12	32306391	32306749	MTD	-	chr12	32306418	32306419
chr12	32343517	32344068	MERVL_2A-int	-	chr12	32343674	32343675
chr12	32485484	32485887	BGLII_Mus	+	chr12	32485577	32485578
chr12	32735738	32735947	URR1A	-	chr12	32735825	32735826
chr12	32744366	32750994	Lx5	-	chr12	32745833	32745834
chr12	32774655	32775457	L1MD	-	chr12	32774844	32774845
chr12	32821717	32821864	B1_Mur3	-	chr12	32821767	32821768
chr12	32827082	32827249	B3	+	chr12	32827158	32827159
chr12	32910958	32911132	B3A	-	chr12	32911036	32911037
chr12	32927536	32927741	B3	+	chr12	32927590	32927591
chr12	32972703	32972890	B3	-	chr12	32972781	32972782
chr12	33016960	33017207	MER58B	-	chr12	33017121	33017122
chr12	33156887	33157066	MIRb	+	chr12	33156935	33156936
chr12	33159340	33159561	RSINE1	-	chr12	33159539	33159540
chr12	33171005	33171372	MLT1G3	+	chr12	33171096	33171097
chr12	33235466	33235545	B3A	+	chr12	33235534	33235535
chr12	33235476	33235592	RSINE1	+	chr12	33235534	33235535
chr12	33280900	33281112	B3	-	chr12	33280982	33280983
chr12	34451213	34451414	X1_DNA	+	chr12	34451398	34451399
chr12	34666039	34666221	B2_Mm2	+	chr12	34666118	34666119
chr12	34725076	34725380	L2a	-	chr12	34725273	34725274
chr12	35288194	35288401	L1M5	-	chr12	35288274	35288275
chr12	35298768	35298939	B3	-	chr12	35298862	35298863
chr12	35303279	35303502	L1MEd	-	chr12	35303330	35303331
chr12	35305368	35305446	RSINE1	-	chr12	35305398	35305399
chr12	35676890	35677228	L1ME3A	+	chr12	35677141	35677142
chr12	35729704	35731193	Lx5	-	chr12	35730496	35730497
chr12	40018216	40018683	Lx8	-	chr12	40018340	40018341
chr12	40278047	40278349	ORR1C1	-	chr12	40278182	40278183
chr12	40504173	40504667	L1M2	+	chr12	40504243	40504244
chr12	40584752	40585041	L1MEc	-	chr12	40584878	40584879
chr12	40680651	40680848	B3	+	chr12	40680720	40680721
chr12	51430030	51430139	ORR1B1-int	+	chr12	51430044	51430045
chr12	51513287	51513819	RLTR30E_MM	-	chr12	51513732	51513733
chr12	51673189	51673995	RMER19B	-	chr12	51673435	51673436
chr12	51678416	51678817	MTD	-	chr12	51678511	51678512
chr12	51822358	51822546	B2_Mm2	-	chr12	51822501	51822502
chr12	51830163	51830263	ID_B1	+	chr12	51830190	51830191
chr12	52327058	52327360	Lx8	-	chr12	52327169	52327170
chr12	52605070	52605603	L1MC5a	-	chr12	52605090	52605091
chr12	52735560	52735749	B2_Mm2	-	chr12	52735683	52735684
chr12	52781477	52782619	Lx9	+	chr12	52782559	52782560
chr12	54444837	54445020	L2c	-	chr12	54444967	54444968
chr12	54640223	54640642	HERVL40-int	-	chr12	54640584	54640585
chr12	54825282	54825493	B3A	+	chr12	54825378	54825379
chr12	54876763	54876952	B2_Mm2	-	chr12	54876872	54876873
chr12	54990689	54990862	B3	+	chr12	54990745	54990746
chr12	55313569	55313740	B2_Mm2	+	chr12	55313628	55313629
chr12	59059888	59060074	B2_Mm2	+	chr12	59059952	59059953
chr12	59078504	59078783	MLT1J1	+	chr12	59078572	59078573
chr12	65182014	65183053	Lx8	-	chr12	65182553	65182554
chr12	69205382	69205567	B2_Mm2	-	chr12	69205498	69205499
chr12	69331226	69331439	B3	-	chr12	69331333	69331334
chr12	69473109	69473207	RSINE1	+	chr12	69473122	69473123
chr12	69486237	69486360	L2d2	-	chr12	69486324	69486325
chr12	69503748	69503910	MTD	+	chr12	69503790	69503791
chr12	69519810	69519959	MIRb	+	chr12	69519849	69519850
chr12	69683539	69683843	MER102b	+	chr12	69683740	69683741
chr12	69750350	69750537	B2_Mm2	-	chr12	69750492	69750493
chr12	69871369	69871593	B4	+	chr12	69871440	69871441
chr12	69962580	69962791	B3	-	chr12	69962720	69962721
chr12	69985704	69985820	MIRc	+	chr12	69985793	69985794
chr12	70155870	70156247	MTD	-	chr12	70156228	70156229
chr12	70929392	70929561	B2_Mm2	+	chr12	70929446	70929447
chr12	70978428	70978586	B3	-	chr12	70978531	70978532
chr12	71051055	71051270	B3	+	chr12	71051187	71051188
chr12	71139435	71139626	B2_Mm2	-	chr12	71139553	71139554
chr12	71346136	71346215	MIR3	-	chr12	71346196	71346197
chr12	71544394	71544564	RSINE1	-	chr12	71544526	71544527
chr12	72007972	72008104	B1_Mus1	-	chr12	72007981	72007982
chr12	72431587	72431901	LTR10_RN	-	chr12	72431632	72431633
chr12	73445728	73446041	Tigger9b	-	chr12	73445816	73445817
chr12	73742070	73742248	B3A	+	chr12	73742138	73742139
chr12	73877404	73877557	ORR1A3-int	+	chr12	73877534	73877535
chr12	73877477	73877624	ID_B1	+	chr12	73877534	73877535
chr12	73901255	73902445	L1MCa	-	chr12	73901286	73901287
chr12	75446587	75446777	L1MC4a	+	chr12	75446594	75446595
chr12	75629727	75629906	B2_Mm2	+	chr12	75629812	75629813
chr12	75638208	75639168	Lx7	+	chr12	75638535	75638536
chr12	75645885	75646019	B2_Mm2	+	chr12	75645963	75645964
chr12	75726592	75726717	PB1D9	+	chr12	75726669	75726670
chr12	75962045	75962230	B2_Mm2	-	chr12	75962156	75962157
chr12	76194729	76194852	B2_Mm2	-	chr12	76194769	76194770
chr12	76367153	76367335	B3	-	chr12	76367238	76367239
chr12	76451385	76451576	B2_Mm2	-	chr12	76451543	76451544
chr12	76467462	76467730	MER63B	-	chr12	76467533	76467534
chr12	76515619	76515810	B2_Mm2	+	chr12	76515688	76515689
chr12	76615173	76615803	ORR1D2-int	+	chr12	76615451	76615452
chr12	76764811	76764976	B3	-	chr12	76764903	76764904
chr12	77070154	77070263	L1M5	-	chr12	77070192	77070193
chr12	77085117	77085758	L1M5	+	chr12	77085421	77085422
chr12	78354107	78354250	B2_Mm2	+	chr12	78354178	78354179
chr12	78537680	78537857	B2_Mm2	+	chr12	78537748	78537749
chr12	78814948	78815111	RSINE1	-	chr12	78815070	78815071
chr12	78923687	78924091	L1_Rod	+	chr12	78923995	78923996
chr12	79109398	79109853	RLTR30B_MM	-	chr12	79109707	79109708
chr12	79330076	79330311	Charlie29b	-	chr12	79330227	79330228
chr12	79352200	79352645	MamGypsy2-I	-	chr12	79352203	79352204
chr12	79356217	79356411	X6B_LINE	+	chr12	79356368	79356369
chr12	79613766	79613984	X6b_DNA	+	chr12	79613973	79613974
chr12	79617885	79618272	ORR1F	-	chr12	79618068	79618069
chr12	80046701	80046876	MIRc	+	chr12	80046788	80046789
chr12	80810008	80810308	Lx8	+	chr12	80810210	80810211
chr12	80839060	80839386	ORR1D2	+	chr12	80839237	80839238
chr12	80839642	80840018	MTEb	+	chr12	80839840	80839841
chr12	80894233	80894397	B2_Mm2	-	chr12	80894327	80894328
chr12	81795088	81795605	MLTR18_MM	-	chr12	81795206	81795207
chr12	81807321	81807710	Lx5c	-	chr12	81807428	81807429
chr12	82244588	82246874	L1M4c	-	chr12	82246551	82246552
chr12	83646985	83647150	B2_Mm2	-	chr12	83647042	83647043
chr12	83897907	83898043	B3	+	chr12	83897916	83897917
chr12	84023145	84023633	RLTR28B	+	chr12	84023284	84023285
chr12	84109811	84110259	RLTR30B_MM	+	chr12	84109857	84109858
chr12	84275045	84275909	RMER19B	-	chr12	84275494	84275495
chr12	84276881	84277041	B2_Mm2	+	chr12	84276927	84276928
chr12	84393057	84393208	B2_Mm2	-	chr12	84393138	84393139
chr12	84580783	84580981	B3	-	chr12	84580922	84580923
chr12	84748085	84748404	L2b	-	chr12	84748193	84748194
chr12	84969362	84969510	MIR	-	chr12	84969488	84969489
chr12	85459051	85459323	RMER15	+	chr12	85459137	85459138
chr12	85523948	85524203	Tigger10	+	chr12	85523956	85523957
chr12	85648026	85648378	ORR1F	+	chr12	85648110	85648111
chr12	86819376	86819690	ORR1C1	+	chr12	86819420	86819421
chr12	86909874	86910173	RMER17C2	-	chr12	86909963	86909964
chr12	86913127	86913318	B2_Mm2	+	chr12	86913185	86913186
chr12	87204303	87205680	MurERV4_19-int	-	chr12	87204455	87204456
chr12	87262656	87262972	MTD	+	chr12	87262851	87262852
chr12	87276175	87276336	B2_Mm2	+	chr12	87276231	87276232
chr12	87403298	87403447	B2_Mm2	-	chr12	87403432	87403433
chr12	87404167	87404350	B2_Mm2	+	chr12	87404253	87404254
chr12	87406808	87406992	B2_Mm2	+	chr12	87406868	87406869
chr12	87416827	87416961	B2_Mm2	+	chr12	87416849	87416850
chr12	87470291	87470367	MTE2a	-	chr12	87470340	87470341
chr12	88445420	88445748	MLT1L	-	chr12	88445667	88445668
chr12	91637433	91638048	L3	-	chr12	91637529	91637530
chr12	91719183	91719538	MTD	-	chr12	91719271	91719272
chr12	91794929	91795363	RMER12	+	chr12	91795137	91795138
chr12	95760837	95760994	B2_Mm2	-	chr12	95760931	95760932
chr12	95838189	95838336	Lx9	+	chr12	95838248	95838249
chr12	98222875	98223794	L1M4b	+	chr12	98223479	98223480
chr12	98283265	98283534	MamGypLTR1b	-	chr12	98283292	98283293
chr12	98850898	98851067	B3	-	chr12	98850961	98850962
chr12	99480589	99480776	B3	+	chr12	99480612	99480613
chr12	99510178	99510359	B3	-	chr12	99510268	99510269
chr12	99544434	99544611	L1ME3B	-	chr12	99544485	99544486
chr12	99646924	99647315	RLTR50A	+	chr12	99647125	99647126
chr12	99921175	99921377	B3	-	chr12	99921256	99921257
chr12	99979367	99979969	Lx7	-	chr12	99979901	99979902
chr12	100182818	100182965	B2_Mm2	-	chr12	100182919	100182920
chr12	100184110	100184432	MLT1A1	+	chr12	100184326	100184327
chr12	100351795	100352013	MIRb	+	chr12	100351985	100351986
chr12	100626260	100626956	L1M4b	-	chr12	100626780	100626781
chr12	100729118	100729275	MLT1J1	+	chr12	100729207	100729208
chr12	100752414	100752583	B2_Mm2	-	chr12	100752533	100752534
chr12	100837241	100837597	ORR1F	-	chr12	100837491	100837492
chr12	102252709	102253161	L1MB7	-	chr12	102252785	102252786
chr12	102339268	102339725	MLT1H1	+	chr12	102339277	102339278
chr12	102437110	102437296	B4	+	chr12	102437164	102437165
chr12	102454483	102454672	B2_Mm2	-	chr12	102454601	102454602
chr12	102800910	102801076	B3	+	chr12	102800975	102800976
chr12	104186352	104186780	L1MC4	-	chr12	104186412	104186413
chr12	104225507	104226071	MMTV-int	-	chr12	104225575	104225576
chr12	104233213	104233729	RMER16	+	chr12	104233390	104233391
chr12	104415488	104415921	L1M4	+	chr12	104415783	104415784
chr12	104836204	104836452	Lx8b	-	chr12	104836414	104836415
chr12	105829547	105829733	B2_Mm2	-	chr12	105829670	105829671
chr12	105850095	105850284	B2_Mm2	+	chr12	105850160	105850161
chr12	108764947	108765326	RLTR12D	-	chr12	108765101	108765102
chr12	110674332	110674521	B3	+	chr12	110674405	110674406
chr12	110677346	110677475	B3	+	chr12	110677406	110677407
chr12	110713959	110714128	B3	-	chr12	110714036	110714037
chr12	110956725	110957335	L1MB7	-	chr12	110957177	110957178
chr12	111127790	111127974	B2_Mm2	+	chr12	111127851	111127852
chr12	111483918	111484010	B1_Mm	+	chr12	111483999	111484000
chr12	111561538	111561724	B2_Mm2	-	chr12	111561625	111561626
chr12	111600989	111601345	RMER15	-	chr12	111601089	111601090
chr12	111643530	111643702	B2_Mm2	+	chr12	111643600	111643601
chr12	111909610	111909762	MIR3	+	chr12	111909621	111909622
chr12	112564167	112564340	MLTR18A_MM	+	chr12	112564195	112564196
chr12	112617207	112617638	L1M4	-	chr12	112617398	112617399
chr12	112895510	112895993	L1MCa	+	chr12	112895863	112895864
chr12	112897393	112897755	L1MD2	+	chr12	112897595	112897596
chr12	112994558	112994732	B2_Mm2	+	chr12	112994604	112994605
chr12	113026590	113026796	B3	-	chr12	113026650	113026651
chr12	113106359	113106487	RSINE1	-	chr12	113106417	113106418
chr12	115011171	115011350	Lx6	-	chr12	115011316	115011317
chr12	115172216	115173509	MLTR25C	-	chr12	115172626	115172627
chr12	116435159	116435764	Lx8	-	chr12	116435467	116435468
chr12	117747260	117747874	BGLII	-	chr12	117747742	117747743
chr13	3515437	3515630	B3	+	chr13	3515531	3515532
chr13	3637134	3637373	L1MdV_II	+	chr13	3637155	3637156
chr13	4730734	4730892	RMER10A	+	chr13	4730882	4730883
chr13	4755966	4756141	L1M4	+	chr13	4756111	4756112
chr13	5704843	5705153	ORR1C2	+	chr13	5705150	5705151
chr13	5716786	5716979	L2	+	chr13	5716888	5716889
chr13	5778285	5778449	MIR1_Amn	-	chr13	5778364	5778365
chr13	5837341	5837786	MLT1F1	-	chr13	5837483	5837484
chr13	5988590	5988708	MIRb	-	chr13	5988638	5988639
chr13	6061040	6061466	MTC	+	chr13	6061374	6061375
chr13	6062331	6062521	MTE2a	-	chr13	6062427	6062428
chr13	6109321	6109647	MLT1B	+	chr13	6109599	6109600
chr13	6119742	6120088	ORR1D2	+	chr13	6119758	6119759
chr13	6460071	6460689	Lx8b	-	chr13	6460440	6460441
chr13	6617377	6617573	B2_Mm2	-	chr13	6617480	6617481
chr13	6889400	6889864	RLTR45	-	chr13	6889656	6889657
chr13	8921752	8922228	RLTR30B_MM	+	chr13	8921842	8921843
chr13	10149340	10149553	Lx8	+	chr13	10149512	10149513
chr13	10198481	10198653	Lx8b	+	chr13	10198512	10198513
chr13	10251486	10252175	L1MC1	+	chr13	10251927	10251928
chr13	12382537	12383220	RMER19B2	+	chr13	12382682	12382683
chr13	13589612	13590044	RMER5	-	chr13	13589698	13589699
chr13	13615128	13615306	B3	-	chr13	13615249	13615250
chr13	15825568	15825714	L1M5	-	chr13	15825665	15825666
chr13	15850383	15851008	Arthur1B	+	chr13	15850712	15850713
chr13	16805351	16805713	L1M4	+	chr13	16805709	16805710
chr13	17693902	17694109	B3	+	chr13	17694013	17694014
chr13	17776049	17776287	Lx8	+	chr13	17776190	17776191
chr13	18720971	18721581	L1M3	-	chr13	18721540	18721541
chr13	19379245	19379285	MER58A	+	chr13	19379281	19379282
chr13	19415612	19416166	L1ME4c	-	chr13	19415983	19415984
chr13	19418268	19418655	BGLII	+	chr13	19418334	19418335
chr13	19806817	19806952	MIR	-	chr13	19806896	19806897
chr13	19841765	19842222	L2	-	chr13	19841775	19841776
chr13	19854509	19854660	Lx8	-	chr13	19854614	19854615
chr13	19884714	19885025	B4	+	chr13	19884741	19884742
chr13	21445945	21446125	B3	-	chr13	21446027	21446028
chr13	23449284	23449434	B3A	+	chr13	23449432	23449433
chr13	23597131	23597249	ID_B1	+	chr13	23597238	23597239
chr13	23659600	23659791	Lx8	-	chr13	23659683	23659684
chr13	23691923	23692094	MIR	+	chr13	23692077	23692078
chr13	23697446	23697599	B3A	+	chr13	23697561	23697562
chr13	24524492	24525171	L1MB7	-	chr13	24524781	24524782
chr13	24776332	24776444	LTR41	-	chr13	24776401	24776402
chr13	24791481	24791822	Lx8b	-	chr13	24791564	24791565
chr13	24793545	24793736	B2_Mm2	-	chr13	24793644	24793645
chr13	24892325	24892516	B2_Mm2	+	chr13	24892425	24892426
chr13	25003076	25003269	B3	+	chr13	25003163	25003164
chr13	28823619	28823829	ID_B1	+	chr13	28823713	28823714
chr13	28842794	28843132	ORR1E	-	chr13	28843058	28843059
chr13	29374361	29374469	ID_B1	-	chr13	29374369	29374370
chr13	29734729	29734866	MIRc	-	chr13	29734774	29734775
chr13	30248298	30248489	B3	-	chr13	30248352	30248353
chr13	30421415	30421875	RLTR30B_MM	+	chr13	30421534	30421535
chr13	30645475	30646874	L1M4c	-	chr13	30645754	30645755
chr13	30762400	30762579	B2_Mm2	+	chr13	30762469	30762470
chr13	30867551	30867619	MTD	+	chr13	30867585	30867586
chr13	30953440	30954063	L1MCa	-	chr13	30953847	30953848
chr13	32839318	32839515	L1MEg	-	chr13	32839429	32839430
chr13	32929348	32931493	Lx2B2	-	chr13	32929629	32929630
chr13	33073462	33073712	MER57-int	-	chr13	33073591	33073592
chr13	33077253	33077457	MLT1A1	+	chr13	33077305	33077306
chr13	33964089	33964366	L1MD1	-	chr13	33964294	33964295
chr13	35080891	35081508	L1M5	-	chr13	35081143	35081144
chr13	35105038	35107879	L1MdV_III	+	chr13	35105864	35105865
chr13	35181086	35181349	MER99	+	chr13	35181102	35181103
chr13	35900316	35900504	B2_Mm2	+	chr13	35900376	35900377
chr13	35949798	35950308	Charlie1a	-	chr13	35950122	35950123
chr13	36074458	36074805	MTD	+	chr13	36074722	36074723
chr13	36132389	36132512	ORR1C2	+	chr13	36132446	36132447
chr13	36200356	36200727	ORR1C2	-	chr13	36200618	36200619
chr13	36312934	36313124	B2_Mm2	+	chr13	36312987	36312988
chr13	36534362	36534687	ORR1F	-	chr13	36534386	36534387
chr13	37140596	37140795	B3	+	chr13	37140645	37140646
chr13	37522987	37523127	B2_Mm2	-	chr13	37523072	37523073
chr13	37642502	37642734	MTEb	-	chr13	37642599	37642600
chr13	37740071	37740492	MTD	-	chr13	37740302	37740303
chr13	37936505	37936680	RLTR16B_MM	+	chr13	37936547	37936548
chr13	37958552	37958846	ORR1F	-	chr13	37958784	37958785
chr13	38002576	38002759	B2_Mm2	-	chr13	38002669	38002670
chr13	39926170	39926331	MER33	-	chr13	39926189	39926190
chr13	40317114	40317218	RSINE1	+	chr13	40317217	40317218
chr13	40317216	40317382	MTD	+	chr13	40317217	40317218
chr13	40849158	40849337	B1_Mur3	+	chr13	40849242	40849243
chr13	40944041	40944233	B4	+	chr13	40944100	40944101
chr13	40997127	40998230	L1ME3G	-	chr13	40997971	40997972
chr13	41000138	41000325	B2_Mm2	-	chr13	41000263	41000264
chr13	41230357	41230773	MLT1H1	+	chr13	41230409	41230410
chr13	41583415	41583942	L1MEb	+	chr13	41583916	41583917
chr13	41725537	41726055	Charlie2a	-	chr13	41726013	41726014
chr13	41883669	41883859	MIR3	-	chr13	41883856	41883857
chr13	42103933	42104062	B3A	-	chr13	42104009	42104010
chr13	42372031	42372857	L2a	-	chr13	42372471	42372472
chr13	43266374	43266679	L1_Rod	+	chr13	43266457	43266458
chr13	43318732	43318910	B2_Mm2	+	chr13	43318811	43318812
chr13	43558732	43558834	PB1D9	+	chr13	43558833	43558834
chr13	43775187	43775345	MER102c	+	chr13	43775330	43775331
chr13	43777393	43777565	B3A	+	chr13	43777559	43777560
chr13	43804734	43804892	B3	+	chr13	43804836	43804837
chr13	44298896	44299383	ORR1C2	-	chr13	44299163	44299164
chr13	44437427	44437941	Charlie1a	-	chr13	44437863	44437864
chr13	44498497	44498884	MTB	-	chr13	44498526	44498527
chr13	44504512	44504820	RLTR12BD_Mm	+	chr13	44504615	44504616
chr13	44534456	44534728	ORR1F	-	chr13	44534515	44534516
chr13	44645994	44646248	ORR1C1	-	chr13	44646059	44646060
chr13	44699341	44699760	LTR73	+	chr13	44699687	44699688
chr13	44741464	44741619	B2_Mm2	-	chr13	44741548	44741549
chr13	44767912	44767986	PB1D7	-	chr13	44767943	44767944
chr13	44800914	44801084	B2_Mm2	-	chr13	44800991	44800992
chr13	44805020	44805119	B3A	-	chr13	44805093	44805094
chr13	45006548	45006729	B3	+	chr13	45006692	45006693
chr13	45460058	45460242	B3	-	chr13	45460134	45460135
chr13	45786041	45786228	B2_Mm2	-	chr13	45786152	45786153
chr13	45849015	45849281	MER21B	+	chr13	45849156	45849157
chr13	45894936	45895137	Tigger14a	+	chr13	45895126	45895127
chr13	46012268	46012685	BGLII	-	chr13	46012596	46012597
chr13	46259699	46260538	L1MEc	-	chr13	46259726	46259727
chr13	46708323	46708477	B3	+	chr13	46708334	46708335
chr13	46715901	46716289	BGLII_Mus	-	chr13	46716192	46716193
chr13	46786193	46786498	ORR1A4	+	chr13	46786244	46786245
chr13	46788917	46789093	B2_Mm2	+	chr13	46788980	46788981
chr13	47081043	47081222	B2_Mm2	-	chr13	47081143	47081144
chr13	47226010	47226381	MER54A	+	chr13	47226019	47226020
chr13	48964911	48965116	B3	-	chr13	48965083	48965084
chr13	49221020	49221178	B2_Mm2	-	chr13	49221085	49221086
chr13	49628316	49628405	MYSERV-int	-	chr13	49628336	49628337
chr13	50418526	50419021	RLTR30B_MM	-	chr13	50418925	50418926
chr13	51397306	51398362	L1MD1	-	chr13	51397871	51397872
chr13	51404329	51404693	ORR1C2	+	chr13	51404546	51404547
chr13	51946270	51946376	MER121	-	chr13	51946352	51946353
chr13	51996246	51996577	ORR1F	-	chr13	51996386	51996387
chr13	52036039	52036071	ID4	-	chr13	52036052	52036053
chr13	52100103	52100368	HAL1	+	chr13	52100309	52100310
chr13	52860338	52860614	L1MEc	-	chr13	52860448	52860449
chr13	52909817	52910266	L1ME1	+	chr13	52910052	52910053
chr13	54558483	54558669	B2_Mm2	+	chr13	54558527	54558528
chr13	55020362	55020575	B4A	+	chr13	55020380	55020381
chr13	55041759	55041924	B2_Mm2	+	chr13	55041807	55041808
chr13	55178019	55178196	B2_Mm2	-	chr13	55178101	55178102
chr13	55249208	55249392	B2_Mm1t	-	chr13	55249319	55249320
chr13	55416290	55416461	B3	-	chr13	55416386	55416387
chr13	55429497	55429603	PB1D10	-	chr13	55429555	55429556
chr13	55519716	55519955	L2	-	chr13	55519814	55519815
chr13	55583148	55583621	RLTR12D	-	chr13	55583389	55583390
chr13	55694792	55694978	B2_Mm2	+	chr13	55694830	55694831
chr13	55895597	55895933	ORR1E	+	chr13	55895706	55895707
chr13	56244657	56244842	B2_Mm2	+	chr13	56244742	56244743
chr13	58158708	58158899	B3	-	chr13	58158815	58158816
chr13	58169035	58169206	B2_Mm1t	-	chr13	58169126	58169127
chr13	58452743	58452894	L1ME4b	-	chr13	58452745	58452746
chr13	58477772	58478172	MTE2a	+	chr13	58478140	58478141
chr13	58687755	58687901	Lx8	+	chr13	58687799	58687800
chr13	59574702	59574896	B2_Mm2	+	chr13	59574780	59574781
chr13	59643508	59643692	B2_Mm2	+	chr13	59643564	59643565
chr13	59668793	59668928	MER58A	+	chr13	59668890	59668891
chr13	60666416	60666587	B2_Mm2	-	chr13	60666533	60666534
chr13	60672344	60672638	MER2	-	chr13	60672424	60672425
chr13	60892801	60893375	L1_Mur3	-	chr13	60892986	60892987
chr13	61946706	61946884	B3	+	chr13	61946757	61946758
chr13	62952467	62952752	L1MC5	+	chr13	62952751	62952752
chr13	63134826	63134957	Tigger19b	-	chr13	63134915	63134916
chr13	63643493	63643700	MLT1K	+	chr13	63643543	63643544
chr13	63810592	63810776	L1MEd	-	chr13	63810756	63810757
chr13	63893265	63893413	RSINE1	-	chr13	63893334	63893335
chr13	64077712	64077920	B3	+	chr13	64077741	64077742
chr13	64180432	64180600	B2_Mm2	-	chr13	64180536	64180537
chr13	64319855	64320011	B2_Mm2	+	chr13	64319940	64319941
chr13	64385062	64385258	B3A	-	chr13	64385191	64385192
chr13	64402117	64402257	MER31B	-	chr13	64402148	64402149
chr13	65226196	65226652	RLTR45	-	chr13	65226578	65226579
chr13	67348168	67348491	MTC	-	chr13	67348276	67348277
chr13	67377777	67378717	RLTR13B3	+	chr13	67378218	67378219
chr13	67455902	67456996	Lx4A	+	chr13	67456956	67456957
chr13	69509735	69509881	B2_Mm2	-	chr13	69509820	69509821
chr13	73451466	73451637	B2_Mm2	+	chr13	73451478	73451479
chr13	73471506	73471920	MTB_Mm	+	chr13	73471813	73471814
chr13	73778340	73778503	B2_Mm2	-	chr13	73778424	73778425
chr13	73791383	73791579	MTE2b	-	chr13	73791415	73791416
chr13	74366995	74367358	RMER19B	+	chr13	74367056	74367057
chr13	76591588	76592089	RLTR30D2_MM	-	chr13	76591870	76591871
chr13	76615137	76618554	L1Lx_IV	-	chr13	76617756	76617757
chr13	77074822	77076589	L1MdFanc_II	+	chr13	77074835	77074836
chr13	80518959	80519149	B2_Mm2	-	chr13	80519057	80519058
chr13	81136105	81136241	L2d2	+	chr13	81136141	81136142
chr13	83472317	83472880	RMER15-int	+	chr13	83472748	83472749
chr13	89767293	89772681	L1Lx_III	+	chr13	89767971	89767972
chr13	90083402	90086977	L1MdV_I	+	chr13	90084942	90084943
chr13	90233450	90234663	RLTR13D3	+	chr13	90234086	90234087
chr13	90499022	90499317	MTEa	-	chr13	90499141	90499142
chr13	90541400	90543780	L1Lx_I	-	chr13	90542583	90542584
chr13	90927087	90927265	B2_Mm2	+	chr13	90927170	90927171
chr13	90984179	90984373	L1MEg	+	chr13	90984291	90984292
chr13	91053193	91059842	Lx3A	+	chr13	91053561	91053562
chr13	91224669	91224734	L1MC4a	+	chr13	91224688	91224689
chr13	91423981	91424151	MIRb	-	chr13	91424118	91424119
chr13	91514905	91515268	L1MC	-	chr13	91515221	91515222
chr13	92221559	92221699	L1MC	+	chr13	92221564	92221565
chr13	92861446	92861830	MLT1A1	-	chr13	92861529	92861530
chr13	93243184	93243329	MIR3	+	chr13	93243191	93243192
chr13	94161912	94162055	MIR3	-	chr13	94161921	94161922
chr13	94298515	94298985	MER77B	+	chr13	94298538	94298539
chr13	94617699	94617863	B2_Mm2	-	chr13	94617797	94617798
chr13	94711678	94711796	L4_B_Mam	+	chr13	94711752	94711753
chr13	94972460	94972785	B4	-	chr13	94972757	94972758
chr13	95070361	95070540	B2_Mm2	+	chr13	95070421	95070422
chr13	95427486	95427838	ORR1F	+	chr13	95427689	95427690
chr13	96106448	96106846	MLT1C2	-	chr13	96106678	96106679
chr13	96512591	96513659	L1MC1	+	chr13	96513013	96513014
chr13	96578582	96579018	RMER6B	-	chr13	96578805	96578806
chr13	96697826	96697974	B3A	-	chr13	96697924	96697925
chr13	96961768	96961977	B3	-	chr13	96961890	96961891
chr13	97066074	97066262	B2_Mm2	-	chr13	97066184	97066185
chr13	97187067	97188099	L1MC4	+	chr13	97187913	97187914
chr13	98683317	98683687	L1MB5	+	chr13	98683649	98683650
chr13	98809173	98809335	B2_Mm2	-	chr13	98809287	98809288
chr13	98812346	98812633	L1MB8	+	chr13	98812437	98812438
chr13	98831168	98831374	B3	-	chr13	98831308	98831309
chr13	98832371	98832691	L1M7	-	chr13	98832582	98832583
chr13	98836827	98836985	B2_Mm2	-	chr13	98836933	98836934
chr13	98874032	98874449	L1_Rod	+	chr13	98874314	98874315
chr13	99126106	99126275	B2_Mm2	+	chr13	99126173	99126174
chr13	99998200	99998384	B2_Mm2	+	chr13	99998276	99998277
chr13	100101125	100101311	B2_Mm2	+	chr13	100101148	100101149
chr13	100156796	100156938	B1F	+	chr13	100156828	100156829
chr13	100307229	100307401	B2_Mm2	-	chr13	100307341	100307342
chr13	100499311	100499492	B2_Mm2	-	chr13	100499420	100499421
chr13	100659972	100660145	B2_Mm2	+	chr13	100660051	100660052
chr13	100697626	100697720	PB1D10	+	chr13	100697639	100697640
chr13	100762221	100762406	B2_Mm2	-	chr13	100762364	100762365
chr13	100853242	100853425	B2_Mm2	-	chr13	100853357	100853358
chr13	101523342	101523661	MamRTE1	-	chr13	101523582	101523583
chr13	101547859	101548353	LTR33B	+	chr13	101548051	101548052
chr13	101867012	101867046	MTE2a	+	chr13	101867037	101867038
chr13	102088525	102088651	MIRb	-	chr13	102088583	102088584
chr13	102094222	102094571	MTEa	+	chr13	102094334	102094335
chr13	102688217	102688420	LTR104_Mam	+	chr13	102688276	102688277
chr13	102745754	102745964	MIR	+	chr13	102745928	102745929
chr13	104306276	104306431	B2_Mm2	+	chr13	104306284	104306285
chr13	104610241	104610422	L1ME3A	-	chr13	104610304	104610305
chr13	105218818	105219788	L1MB1	+	chr13	105219698	105219699
chr13	105291296	105292531	RLTR6-int	-	chr13	105291969	105291970
chr13	106998604	106998781	L1M5	-	chr13	106998774	106998775
chr13	107676515	107676688	MER121	-	chr13	107676587	107676588
chr13	107899718	107900100	L2b	+	chr13	107899822	107899823
chr13	107944819	107945356	L2b	-	chr13	107945065	107945066
chr13	108015060	108015465	HAL1	-	chr13	108015392	108015393
chr13	108775845	108776175	L2a	+	chr13	108776067	108776068
chr13	108813022	108813236	B3	-	chr13	108813141	108813142
chr13	109044788	109044896	Lx6	+	chr13	109044877	109044878
chr13	110384624	110384855	Lx5b	-	chr13	110384694	110384695
chr13	110810404	110810709	L2c	+	chr13	110810441	110810442
chr13	110903230	110903662	LTR33A	+	chr13	110903334	110903335
chr13	111741189	111741631	RMER4A	+	chr13	111741204	111741205
chr13	112308362	112308473	PB1D11	+	chr13	112308393	112308394
chr13	112354374	112354591	MurERV4-int	-	chr13	112354467	112354468
chr13	112786195	112786398	L1_Mur2	-	chr13	112786348	112786349
chr13	112828842	112829042	B3	+	chr13	112828921	112828922
chr13	113486520	113486597	MIRc	-	chr13	113486532	113486533
chr13	113508411	113508774	MLT1B	-	chr13	113508568	113508569
chr13	115151026	115151208	B2_Mm2	+	chr13	115151095	115151096
chr13	116950934	116951758	LTR37-int	+	chr13	116951486	116951487
chr13	117052647	117052991	MLT1L	-	chr13	117052927	117052928
chr13	117215792	117215910	MER95	+	chr13	117215858	117215859
chr13	117222648	117222775	B3	+	chr13	117222676	117222677
chr13	117223074	117223264	B2_Mm2	-	chr13	117223204	117223205
chr13	118420508	118420686	Lx9	-	chr13	118420579	118420580
chr13	119308882	119309472	L1MA6	-	chr13	119309432	119309433
chr13	119310056	119310157	MIR	-	chr13	119310100	119310101
chr13	120288016	120288323	MT2B1	+	chr13	120288305	120288306
chr14	7958625	7958824	MIR1_Amn	+	chr14	7958755	7958756
chr14	7987465	7987916	RLTR30B_MM	+	chr14	7987535	7987536
chr14	10208933	10209299	MTD	+	chr14	10209239	10209240
chr14	12320065	12320252	B2_Mm2	+	chr14	12320122	12320123
chr14	13911473	13911858	L2a	+	chr14	13911623	13911624
chr14	14292305	14294804	MuRRS-int	-	chr14	14294560	14294561
chr14	14436985	14437213	RMER19B2	-	chr14	14437155	14437156
chr14	14587801	14590970	L1MdFanc_II	-	chr14	14590102	14590103
chr14	14607112	14607280	B2_Mm2	-	chr14	14607198	14607199
chr14	14634126	14634328	B3	-	chr14	14634256	14634257
chr14	16256257	16256538	ORR1F	+	chr14	16256359	16256360
chr14	18260453	18260613	B2_Mm2	-	chr14	18260540	18260541
chr14	18506193	18506461	ORR1F	-	chr14	18506245	18506246
chr14	18931038	18931214	MIRb	+	chr14	18931178	18931179
chr14	19950939	19951040	MIRb	+	chr14	19950962	19950963
chr14	19985186	19985437	LTR33	+	chr14	19985280	19985281
chr14	20422187	20422536	L2a	-	chr14	20422439	20422440
chr14	20428682	20428847	B2_Mm2	+	chr14	20428763	20428764
chr14	20766696	20767256	L1MA7	-	chr14	20767180	20767181
chr14	20894912	20895097	B4	+	chr14	20895054	20895055
chr14	20895035	20895250	MLT1B	+	chr14	20895054	20895055
chr14	21000482	21000670	B2_Mm2	+	chr14	21000552	21000553
chr14	21090330	21090686	ORR1D2	-	chr14	21090624	21090625
chr14	21267952	21268790	RMER19B	-	chr14	21268399	21268400
chr14	21299866	21300244	HAL1	-	chr14	21300002	21300003
chr14	21841956	21842145	B2_Mm2	-	chr14	21842076	21842077
chr14	21890453	21890652	MIRb	+	chr14	21890634	21890635
chr14	21947985	21948173	B2_Mm2	-	chr14	21948089	21948090
chr14	21973324	21973523	MER63A	-	chr14	21973371	21973372
chr14	25464273	25464411	MIRc	-	chr14	25464312	25464313
chr14	25516130	25516314	MIR	+	chr14	25516224	25516225
chr14	25789252	25789429	ORR1G	-	chr14	25789399	25789400
chr14	26624086	26624599	Lx9	+	chr14	26624470	26624471
chr14	26643306	26643777	L1MB7	-	chr14	26643413	26643414
chr14	26698046	26698208	B2_Mm2	-	chr14	26698122	26698123
chr14	26764782	26765183	RLTR50A	-	chr14	26765028	26765029
chr14	26826077	26826390	L2a	-	chr14	26826209	26826210
chr14	26973154	26973329	B2_Mm2	+	chr14	26973206	26973207
chr14	27355027	27355375	L1MC4a	+	chr14	27355267	27355268
chr14	27412520	27413272	L1ME2	-	chr14	27412885	27412886
chr14	27562408	27562816	IAPLTR3-int	+	chr14	27562800	27562801
chr14	30187233	30191039	L1Lx_IV	-	chr14	30190204	30190205
chr14	30324906	30325371	MLT1K	+	chr14	30325226	30325227
chr14	30362441	30362713	B4	+	chr14	30362475	30362476
chr14	30405828	30406348	HAL1	+	chr14	30405915	30405916
chr14	30410556	30411243	MER20B	+	chr14	30410917	30410918
chr14	30457886	30458475	L2a	-	chr14	30458085	30458086
chr14	30578116	30578281	B3	+	chr14	30578184	30578185
chr14	30579225	30579586	Lx8b	+	chr14	30579497	30579498
chr14	30761288	30761717	L2a	+	chr14	30761393	30761394
chr14	31004528	31004697	B2_Mm2	-	chr14	31004653	31004654
chr14	31025881	31026067	B2_Mm2	+	chr14	31025941	31025942
chr14	31062339	31062517	B2_Mm2	+	chr14	31062406	31062407
chr14	31164656	31164847	B2_Mm2	+	chr14	31164732	31164733
chr14	31219904	31220060	B2_Mm2	+	chr14	31219924	31219925
chr14	31250067	31250218	B2_Mm2	+	chr14	31250131	31250132
chr14	31593387	31593571	B3A	+	chr14	31593413	31593414
chr14	31596638	31596851	ID_B1	+	chr14	31596787	31596788
chr14	31761770	31762156	ORR1D2	+	chr14	31761872	31761873
chr14	31785622	31786015	MLT1L	+	chr14	31785877	31785878
chr14	31930263	31930689	MLT1G1	-	chr14	31930566	31930567
chr14	33201683	33202274	Lx5c	-	chr14	33202252	33202253
chr14	34109863	34110048	B2_Mm2	+	chr14	34109935	34109936
chr14	34452024	34452216	B2_Mm2	+	chr14	34452079	34452080
chr14	36953051	36953779	Lx9	+	chr14	36953239	36953240
chr14	37137689	37137850	B2_Mm2	+	chr14	37137768	37137769
chr14	40949673	40950036	L1MC4	+	chr14	40949865	40949866
chr14	45038068	45038368	L1MB5	+	chr14	45038212	45038213
chr14	46870102	46870297	B2_Mm2	-	chr14	46870222	46870223
chr14	47276046	47276261	Lx8	+	chr14	47276124	47276125
chr14	47351069	47351185	ORR1G	+	chr14	47351105	47351106
chr14	47354381	47354576	B3	-	chr14	47354384	47354385
chr14	47359435	47359914	RMER6B	+	chr14	47359754	47359755
chr14	47361827	47361946	PB1D10	+	chr14	47361861	47361862
chr14	47453108	47453587	RLTR30B_MM	-	chr14	47453537	47453538
chr14	47454944	47455324	MLT1J	+	chr14	47454969	47454970
chr14	47645588	47645774	ERVL-int	-	chr14	47645719	47645720
chr14	47860850	47860900	B1_Mus1	-	chr14	47860885	47860886
chr14	47915852	47916113	RMER4B	-	chr14	47915872	47915873
chr14	48896336	48896516	LTR33A	-	chr14	48896420	48896421
chr14	50372502	50372779	MTD	-	chr14	50372657	50372658
chr14	50803720	50803867	B1_Mus1	+	chr14	50803791	50803792
chr14	50842558	50842746	MTE2b	+	chr14	50842693	50842694
chr14	50864746	50865143	MTB	+	chr14	50865138	50865139
chr14	51157004	51158125	Lx5	-	chr14	51157206	51157207
chr14	51163132	51164143	RLTR13D5	-	chr14	51163614	51163615
chr14	51172603	51172792	B3	-	chr14	51172646	51172647
chr14	51843705	51843912	B3	-	chr14	51843863	51843864
chr14	51883753	51883928	B2_Mm2	-	chr14	51883816	51883817
chr14	51926203	51926668	RLTR30B_MM	-	chr14	51926536	51926537
chr14	52106960	52107077	B1_Mur2	-	chr14	52107015	52107016
chr14	53751796	53752191	MTD	-	chr14	53751895	53751896
chr14	53753675	53754356	RMER19B2	+	chr14	53753781	53753782
chr14	54538667	54538747	B1_Mur4	+	chr14	54538715	54538716
chr14	54538713	54538835	B3	+	chr14	54538715	54538716
chr14	54554567	54554628	B1_Mur2	-	chr14	54554613	54554614
chr14	54647329	54647504	B2_Mm2	+	chr14	54647407	54647408
chr14	54786026	54786196	B3	+	chr14	54786036	54786037
chr14	54868378	54868566	B2_Mm1t	+	chr14	54868391	54868392
chr14	54879372	54879559	B2_Mm1t	-	chr14	54879501	54879502
chr14	55038734	55038886	B2_Mm2	+	chr14	55038748	55038749
chr14	55528044	55528241	B3	+	chr14	55528079	55528080
chr14	55917053	55917243	B2_Mm2	-	chr14	55917174	55917175
chr14	56104722	56105147	L1MC5a	+	chr14	56104964	56104965
chr14	56824205	56824359	RMER17B2	+	chr14	56824318	56824319
chr14	57584737	57584918	B2_Mm2	-	chr14	57584865	57584866
chr14	57915482	57915669	L1M4	-	chr14	57915492	57915493
chr14	58200885	58201555	L1_Mur3	-	chr14	58201466	58201467
chr14	59149325	59152021	L1MdV_III	-	chr14	59151298	59151299
chr14	59185739	59186130	MTD	+	chr14	59185753	59185754
chr14	59186112	59186288	L1M4	+	chr14	59186165	59186166
chr14	59433849	59434253	MTB_Mm	-	chr14	59434018	59434019
chr14	60185452	60185665	B2_Mm2	+	chr14	60185503	60185504
chr14	60422890	60423232	MLT1A1	-	chr14	60423018	60423019
chr14	60431093	60431458	ORR1D2	+	chr14	60431453	60431454
chr14	60431845	60432036	RMER15	-	chr14	60431941	60431942
chr14	60444284	60444924	RLTR40	-	chr14	60444390	60444391
chr14	60466437	60466650	B2_Mm2	+	chr14	60466537	60466538
chr14	60738907	60739003	PB1D7	+	chr14	60738941	60738942
chr14	60770989	60771523	L1MB3	-	chr14	60771262	60771263
chr14	61360934	61361199	L1MB2	+	chr14	61361005	61361006
chr14	61518944	61519036	MTEb	-	chr14	61519034	61519035
chr14	61548591	61548948	ORR1F	+	chr14	61548769	61548770
chr14	61564976	61565170	B2_Mm1t	-	chr14	61565136	61565137
chr14	61570197	61570377	B2_Mm2	+	chr14	61570264	61570265
chr14	62074194	62074628	RLTR30E_MM	-	chr14	62074528	62074529
chr14	62657556	62658070	Lx8b	-	chr14	62657784	62657785
chr14	62808604	62809010	LTR16	+	chr14	62808870	62808871
chr14	63078495	63078837	MLT1F	+	chr14	63078567	63078568
chr14	63082259	63082635	L2a	+	chr14	63082411	63082412
chr14	63087947	63088170	MER2	+	chr14	63087965	63087966
chr14	64656028	64656271	B3	-	chr14	64656217	64656218
chr14	64766173	64766681	L3	-	chr14	64766295	64766296
chr14	64869959	64871233	Lx5c	+	chr14	64870245	64870246
chr14	64925113	64925257	B2_Mm2	-	chr14	64925175	64925176
chr14	64926946	64927166	B3	-	chr14	64927110	64927111
chr14	65101219	65101413	MIRb	-	chr14	65101321	65101322
chr14	65113537	65113862	L1MC4	+	chr14	65113595	65113596
chr14	65249153	65249332	B2_Mm2	+	chr14	65249202	65249203
chr14	65597815	65597997	B2_Mm2	+	chr14	65597890	65597891
chr14	66184733	66184932	MIR	-	chr14	66184913	66184914
chr14	66186745	66186885	L2d2	+	chr14	66186793	66186794
chr14	66193885	66194549	MER21C	+	chr14	66194340	66194341
chr14	66223843	66223905	MIRc	+	chr14	66223850	66223851
chr14	66340907	66341170	Eutr16	+	chr14	66340978	66340979
chr14	66541186	66541488	MTEa	-	chr14	66541406	66541407
chr14	67888052	67888248	MIR3	+	chr14	67888242	67888243
chr14	70060477	70060613	B4	+	chr14	70060556	70060557
chr14	70062411	70062634	L1MEi	-	chr14	70062438	70062439
chr14	70096057	70096355	LX3	-	chr14	70096104	70096105
chr14	70361537	70361947	L1Lx_I	+	chr14	70361624	70361625
chr14	70402383	70402602	B3A	-	chr14	70402576	70402577
chr14	71071780	71071967	B2_Mm2	+	chr14	71071786	71071787
chr14	71333446	71334227	MTE-int	+	chr14	71334189	71334190
chr14	72576418	72576585	B2_Mm2	-	chr14	72576510	72576511
chr14	72600686	72600879	B3	-	chr14	72600804	72600805
chr14	73684712	73685544	Lx9	-	chr14	73685132	73685133
chr14	74651932	74652183	L1MEj	-	chr14	74652163	74652164
chr14	74841713	74841955	RLTR11A2	-	chr14	74841918	74841919
chr14	74841895	74841958	Lx5	+	chr14	74841918	74841919
chr14	74847676	74847899	ORR1D2	-	chr14	74847880	74847881
chr14	74936427	74936557	B1_Mur1	-	chr14	74936470	74936471
chr14	74949138	74949724	L1_Rod	-	chr14	74949211	74949212
chr14	75008342	75008500	MTB	-	chr14	75008417	75008418
chr14	75034622	75034810	B2_Mm2	-	chr14	75034694	75034695
chr14	75147535	75148069	L1Lx_I	+	chr14	75147962	75147963
chr14	75516176	75516795	Lx8	-	chr14	75516409	75516410
chr14	75695818	75695975	B2_Mm2	-	chr14	75695949	75695950
chr14	75771050	75771229	B2_Mm2	+	chr14	75771074	75771075
chr14	75790412	75790853	MLT1F1	-	chr14	75790589	75790590
chr14	76474306	76474494	B2_Mm2	-	chr14	76474426	76474427
chr14	76903495	76903687	MER5A	-	chr14	76903611	76903612
chr14	77536181	77536961	L2c	-	chr14	77536506	77536507
chr14	78631078	78631201	B1F	+	chr14	78631104	78631105
chr14	78634942	78635147	B3	+	chr14	78634950	78634951
chr14	78678058	78678398	HAL1	+	chr14	78678246	78678247
chr14	78748393	78748639	L2b	+	chr14	78748483	78748484
chr14	79288394	79288602	B3	-	chr14	79288529	79288530
chr14	79441506	79441765	LTR16E1	+	chr14	79441626	79441627
chr14	79469717	79469922	B3	+	chr14	79469831	79469832
chr14	79521608	79521715	PB1D11	-	chr14	79521676	79521677
chr14	87125563	87125764	B3A	+	chr14	87125661	87125662
chr14	97028463	97028812	MTD	+	chr14	97028791	97028792
chr14	97898717	97898866	B2_Mm2	-	chr14	97898839	97898840
chr14	97898740	97898881	RSINE1	-	chr14	97898839	97898840
chr14	98929411	98929701	B4A	+	chr14	98929493	98929494
chr14	102748791	102749192	L2b	-	chr14	102748888	102748889
chr14	103003936	103004085	B2_Mm2	-	chr14	103004004	103004005
chr14	103011510	103012534	L1MA6	-	chr14	103012042	103012043
chr14	103019866	103020295	RMER2	+	chr14	103020028	103020029
chr14	103037332	103037730	MTE2a	-	chr14	103037369	103037370
chr14	103046142	103046521	Lx9	-	chr14	103046452	103046453
chr14	103945735	103946194	MLT1E2	+	chr14	103945959	103945960
chr14	103978918	103979655	RLTR19-int	-	chr14	103979027	103979028
chr14	104848458	104849640	MLTR25C	-	chr14	104849474	104849475
chr14	105435441	105435588	MTD	+	chr14	105435483	105435484
chr14	106035301	106035473	MIRb	+	chr14	106035466	106035467
chr14	106044272	106045282	ERVL-E-int	+	chr14	106044624	106044625
chr14	106193790	106194252	ERVB3_1-I_MM	+	chr14	106194166	106194167
chr14	106348769	106348947	B2_Mm2	+	chr14	106348857	106348858
chr14	114948422	114948698	L1MC1	+	chr14	114948554	114948555
chr14	114980081	114980335	L2a	+	chr14	114980221	114980222
chr14	117626037	117626176	RSINE1	-	chr14	117626073	117626074
chr14	117761186	117761358	X1_LINE	+	chr14	117761341	117761342
chr14	118662661	118662950	MTEb	+	chr14	118662778	118662779
chr14	121372177	121372296	B1F	-	chr14	121372293	121372294
chr14	121426902	121427068	B3	+	chr14	121426968	121426969
chr14	121439492	121439626	B1_Mur4	-	chr14	121439527	121439528
chr14	121439514	121439660	ORR1C2-int	-	chr14	121439527	121439528
chr15	3270057	3270208	RSINE1	+	chr15	3270095	3270096
chr15	3984417	3984773	L2	-	chr15	3984661	3984662
chr15	4024327	4024431	B1F	+	chr15	4024385	4024386
chr15	4167807	4168252	RMER15	+	chr15	4168095	4168096
chr15	5126595	5126705	RMER15-int	-	chr15	5126693	5126694
chr15	5302278	5302772	MLT1H1	-	chr15	5302579	5302580
chr15	5432346	5432864	Lx8	+	chr15	5432645	5432646
chr15	5576622	5576839	Lx7	+	chr15	5576749	5576750
chr15	5856282	5856770	RMER6B	-	chr15	5856571	5856572
chr15	5950911	5951056	L1M5	+	chr15	5951034	5951035
chr15	6334094	6334279	B2_Mm2	-	chr15	6334229	6334230
chr15	6341358	6341716	LTR91	+	chr15	6341611	6341612
chr15	6554585	6554802	MTE2a	+	chr15	6554705	6554706
chr15	6622573	6623084	MER68B	-	chr15	6622696	6622697
chr15	7083258	7083468	Lx8	+	chr15	7083339	7083340
chr15	7084004	7084616	Lx8	+	chr15	7084506	7084507
chr15	7964629	7965047	RLTR30B_MM	+	chr15	7964665	7964666
chr15	8446590	8446763	MamSINE1	+	chr15	8446662	8446663
chr15	8992282	8992475	MIRb	-	chr15	8992349	8992350
chr15	9256386	9256898	L1M5	-	chr15	9256834	9256835
chr15	9373841	9374158	RLTR30C_MM	-	chr15	9374028	9374029
chr15	9580673	9580855	MIRb	-	chr15	9580852	9580853
chr15	9671684	9671856	B3	+	chr15	9671721	9671722
chr15	9954993	9955543	RMER10A	+	chr15	9955192	9955193
chr15	10487401	10487572	B2_Mm2	-	chr15	10487509	10487510
chr15	10767792	10767913	B3	-	chr15	10767829	10767830
chr15	10794672	10795784	Lx8b	+	chr15	10795601	10795602
chr15	10874819	10874957	B2_Mm2	-	chr15	10874922	10874923
chr15	10876425	10876776	MLT1F1	+	chr15	10876476	10876477
chr15	10884180	10884846	RMER19B2	-	chr15	10884741	10884742
chr15	10913381	10913740	RLTR9A4	+	chr15	10913483	10913484
chr15	11716179	11716564	ORR1E	-	chr15	11716234	11716235
chr15	12014325	12014718	ORR1C2	-	chr15	12014482	12014483
chr15	12023286	12023503	L1MB2	+	chr15	12023345	12023346
chr15	25303199	25303372	MER96B	-	chr15	25303227	25303228
chr15	25355662	25355845	B2_Mm2	-	chr15	25355785	25355786
chr15	25600428	25600663	MTB	-	chr15	25600479	25600480
chr15	25789425	25789785	L1MC5	-	chr15	25789526	25789527
chr15	25862786	25863754	HAL1	-	chr15	25862996	25862997
chr15	25884344	25884538	L1MC2	+	chr15	25884533	25884534
chr15	25891660	25891784	B1F1	+	chr15	25891763	25891764
chr15	25896657	25897059	L1M1	+	chr15	25896933	25896934
chr15	25928913	25929114	B3	+	chr15	25928979	25928980
chr15	27937066	27937177	MIRb	+	chr15	27937147	27937148
chr15	28027286	28028067	L1MC3	+	chr15	28027916	28027917
chr15	28048191	28048386	B2_Mm2	+	chr15	28048261	28048262
chr15	30519600	30520244	L1M4	-	chr15	30520228	30520229
chr15	30607933	30608420	MER45B	-	chr15	30608285	30608286
chr15	31466973	31467143	MER34B	+	chr15	31467132	31467133
chr15	31474136	31474395	Lx8	+	chr15	31474162	31474163
chr15	33359155	33359990	Lx6	-	chr15	33359294	33359295
chr15	33465757	33466029	Tigger5b_Glire	-	chr15	33465837	33465838
chr15	34066924	34067343	RLTR23	-	chr15	34067275	34067276
chr15	34094062	34094323	B4A	-	chr15	34094216	34094217
chr15	34327672	34327849	B2_Mm2	-	chr15	34327796	34327797
chr15	34420565	34420743	B2_Mm2	+	chr15	34420605	34420606
chr15	34682114	34682296	Lx8	+	chr15	34682266	34682267
chr15	35138643	35140104	RMER17C-int	+	chr15	35140056	35140057
chr15	35724616	35724790	L1MEf	-	chr15	35724640	35724641
chr15	36367337	36367671	ORR1E	-	chr15	36367495	36367496
chr15	36565452	36565642	B2_Mm2	-	chr15	36565579	36565580
chr15	36719138	36719458	ORR1F	-	chr15	36719415	36719416
chr15	36782195	36782293	PB1D10	-	chr15	36782248	36782249
chr15	38113316	38113462	B3	+	chr15	38113362	38113363
chr15	38164619	38164802	B2_Mm2	+	chr15	38164672	38164673
chr15	38244789	38245135	MLT1J2	-	chr15	38245070	38245071
chr15	38285596	38286008	MTC	+	chr15	38285979	38285980
chr15	38527468	38528191	ORR1D-int	-	chr15	38528131	38528132
chr15	38531897	38532099	B2_Mm2	-	chr15	38532029	38532030
chr15	38589269	38589398	MER21C	+	chr15	38589381	38589382
chr15	38602304	38602494	L1MB7	+	chr15	38602398	38602399
chr15	38672495	38672608	PB1D11	+	chr15	38672508	38672509
chr15	38695549	38695731	B2_Mm2	-	chr15	38695662	38695663
[truncated: 4,178 more rows]

## Sheet: IFNG 1.5h STAT1 (Platanitis)
Chromosome	Start	End	Family	Strand	Peak chromosome	Summit start	Summit end
chr1	4873534	4874497	Lx7	+	chr1	4873579	4873580
chr1	6555355	6557206	L1MdMus_I	-	chr1	6556993	6556994
chr1	6585972	6586625	RCHARR1	-	chr1	6586463	6586464
chr1	6624465	6624856	MTD	+	chr1	6624766	6624767
chr1	6717307	6718052	L2	+	chr1	6717766	6717767
chr1	7085941	7086156	MTA_Mm	+	chr1	7086131	7086132
chr1	9876775	9877010	L1M5	-	chr1	9876963	9876964
chr1	10219626	10220780	Lx9	+	chr1	10220256	10220257
chr1	13332720	13333050	L1M4	+	chr1	13332817	13332818
chr1	13511319	13514066	MuRRS-int	-	chr1	13513736	13513737
chr1	13873900	13874267	ORR1B2	-	chr1	13874132	13874133
chr1	16084485	16084601	B3A	-	chr1	16084525	16084526
chr1	16161499	16161838	ORR1F	+	chr1	16161657	16161658
chr1	23399511	23399933	L1ME1	+	chr1	23399728	23399729
chr1	24062734	24063022	B4A	+	chr1	24062740	24062741
chr1	34464317	34464894	L1MB8	-	chr1	34464857	34464858
chr1	34521897	34521926	L1_Mur3	+	chr1	34521901	34521902
chr1	36436549	36436744	B3	-	chr1	36436717	36436718
chr1	36573974	36574048	L1_Mur3	+	chr1	36574012	36574013
chr1	36614694	36615082	MTD	-	chr1	36614705	36614706
chr1	36616917	36617199	L1_Rod	+	chr1	36617011	36617012
chr1	36918175	36918388	B3A	+	chr1	36918264	36918265
chr1	36986935	36987328	L1M7	-	chr1	36987257	36987258
chr1	37000952	37001048	Lx9	+	chr1	37000952	37000953
chr1	37472281	37472490	L1M3b	+	chr1	37472459	37472460
chr1	37486642	37486735	L1ME3G	+	chr1	37486659	37486660
chr1	37538769	37538960	B2_Mm2	+	chr1	37538816	37538817
chr1	37560155	37560356	L1M5	+	chr1	37560164	37560165
chr1	37633386	37633424	PB1D7	+	chr1	37633399	37633400
chr1	37758895	37759473	L1MC4	+	chr1	37759229	37759230
chr1	38777866	38778290	L1MC3	-	chr1	38777877	38777878
chr1	39579287	39579479	L2c	+	chr1	39579340	39579341
chr1	39707160	39707572	L1MD1	-	chr1	39707316	39707317
chr1	39768038	39768484	RMER4A	+	chr1	39768085	39768086
chr1	39918625	39919770	L1M4	-	chr1	39918874	39918875
chr1	39924851	39925068	MTC	+	chr1	39925057	39925058
chr1	40087627	40087725	MER5A	+	chr1	40087713	40087714
chr1	43474775	43475171	LTR33B	-	chr1	43474818	43474819
chr1	43507866	43508004	URR1B	+	chr1	43507996	43507997
chr1	43507954	43508276	ORR1F	+	chr1	43507996	43507997
chr1	43738251	43738459	B3	+	chr1	43738292	43738293
chr1	43821953	43822464	L1MC5a	+	chr1	43821972	43821973
chr1	43911872	43912005	B1F	-	chr1	43912000	43912001
chr1	44042248	44042574	MT2A	+	chr1	44042308	44042309
chr1	46873907	46874189	ORR1E	-	chr1	46873981	46873982
chr1	46964370	46964577	B3	-	chr1	46964496	46964497
chr1	51513804	51513939	ORR1B1-int	+	chr1	51513900	51513901
chr1	51513825	51513974	B1_Mur3	+	chr1	51513900	51513901
chr1	51514584	51514768	Tigger15a	-	chr1	51514650	51514651
chr1	51584969	51585330	ORR1F	+	chr1	51585120	51585121
chr1	51669121	51669520	RLTR31C_MM	+	chr1	51669230	51669231
chr1	51930616	51930899	LTR33A	-	chr1	51930845	51930846
chr1	52112398	52112544	L2a	-	chr1	52112470	52112471
chr1	52734395	52735125	L1MB8	-	chr1	52734514	52734515
chr1	52764305	52764712	ERVB3_1-I_MM	-	chr1	52764339	52764340
chr1	52765539	52765685	B2_Mm2	-	chr1	52765557	52765558
chr1	52847403	52847824	MTC	+	chr1	52847774	52847775
chr1	53859259	53859408	B1F	-	chr1	53859383	53859384
chr1	54923380	54923461	MER81	+	chr1	54923437	54923438
chr1	54935016	54935235	ERVL-E-int	+	chr1	54935140	54935141
chr1	55012597	55012784	B2_Mm2	+	chr1	55012683	55012684
chr1	55213384	55213575	B2_Mm2	-	chr1	55213551	55213552
chr1	55504608	55506368	Lx8	-	chr1	55505163	55505164
chr1	55506503	55506712	MIRb	+	chr1	55506603	55506604
chr1	55766674	55767011	L1M4	+	chr1	55766867	55766868
chr1	57973154	57973470	L2	-	chr1	57973319	57973320
chr1	58450611	58450759	RSINE1	-	chr1	58450662	58450663
chr1	58693779	58694073	L1M5	-	chr1	58693908	58693909
chr1	58802248	58802463	Lx9	+	chr1	58802425	58802426
chr1	59646647	59646715	L1M5	+	chr1	59646664	59646665
chr1	60833838	60834063	L4_A_Mam	-	chr1	60833888	60833889
chr1	60937062	60937730	MamGypLTR1c	-	chr1	60937528	60937529
chr1	62715145	62715352	B3	+	chr1	62715240	62715241
chr1	64189551	64189879	MTEa	-	chr1	64189654	64189655
chr1	64199065	64199194	ID_B1	-	chr1	64199076	64199077
chr1	64246528	64246977	ORR1F	+	chr1	64246725	64246726
chr1	64249478	64250364	RLTR13B1	+	chr1	64249588	64249589
chr1	64295278	64296037	L1M4b	+	chr1	64295528	64295529
chr1	64338879	64339013	MIR	+	chr1	64338948	64338949
chr1	64374792	64374882	AmnSINE1	+	chr1	64374875	64374876
chr1	64543844	64544021	B2_Mm2	+	chr1	64543911	64543912
chr1	64621169	64621446	Tigger5b_Glire	-	chr1	64621381	64621382
chr1	66278934	66279207	Lx8b	+	chr1	66279046	66279047
chr1	66713058	66713703	RMER6D	-	chr1	66713066	66713067
chr1	66816019	66816277	MIRb	-	chr1	66816040	66816041
chr1	70858382	70858884	RMER15	-	chr1	70858707	70858708
chr1	71003810	71004084	L1MB2	+	chr1	71004045	71004046
chr1	71097990	71098357	MTD	+	chr1	71098098	71098099
chr1	74200801	74201413	L1MA8	-	chr1	74201293	74201294
chr1	74391070	74391262	B3	+	chr1	74391195	74391196
chr1	74720822	74721307	RMER6B	+	chr1	74721088	74721089
chr1	74723846	74724052	B3	-	chr1	74723968	74723969
chr1	74872465	74872619	B3	+	chr1	74872513	74872514
chr1	74997213	74997564	MTC	+	chr1	74997446	74997447
chr1	77213728	77214117	L1MEf	+	chr1	77213885	77213886
chr1	78486136	78486347	B3	+	chr1	78486203	78486204
chr1	78490459	78490573	MLT2B1	-	chr1	78490462	78490463
chr1	78712819	78712972	L2	+	chr1	78712873	78712874
chr1	79671402	79671636	L2b	+	chr1	79671404	79671405
chr1	79803604	79803815	MTEb	+	chr1	79803757	79803758
chr1	80609731	80609873	L1MA8	+	chr1	80609856	80609857
chr1	80610118	80610747	Lx8b	+	chr1	80610724	80610725
chr1	80622621	80623093	RLTR30B_MM	+	chr1	80622688	80622689
chr1	80661753	80661934	MIRc	-	chr1	80661919	80661920
chr1	80785181	80785288	PB1D11	-	chr1	80785260	80785261
chr1	82797106	82797475	MLT1A1	-	chr1	82797180	82797181
chr1	82841391	82841570	B2_Mm2	-	chr1	82841480	82841481
chr1	84147800	84148251	MTEb	+	chr1	84147878	84147879
chr1	84177786	84178155	L1ME1	+	chr1	84177960	84177961
chr1	84191261	84191838	L1MC1	+	chr1	84191413	84191414
chr1	84321049	84321721	L3	-	chr1	84321593	84321594
chr1	84426694	84426880	MT2A	+	chr1	84426874	84426875
chr1	84541315	84541464	L2	-	chr1	84541329	84541330
chr1	84822406	84822697	ORR1F	+	chr1	84822686	84822687
chr1	84823581	84823793	B3	+	chr1	84823724	84823725
chr1	84865008	84865088	MER58C	-	chr1	84865081	84865082
chr1	84874399	84874511	B1_Mur4	+	chr1	84874499	84874500
chr1	84882671	84882857	B3A	+	chr1	84882713	84882714
chr1	86154068	86154192	B1_Mus2	-	chr1	86154105	86154106
chr1	86202839	86202948	Charlie4z	+	chr1	86202900	86202901
chr1	86465998	86466169	ORR1D2	-	chr1	86466092	86466093
chr1	86469608	86469704	B1_Mur1	+	chr1	86469678	86469679
chr1	86615761	86615922	B2_Mm2	-	chr1	86615854	86615855
chr1	87348383	87348612	ID_B1	-	chr1	87348552	87348553
chr1	87348472	87348613	B3A	-	chr1	87348552	87348553
chr1	87490860	87491199	MTE2a	-	chr1	87490960	87490961
chr1	87554861	87555288	MTE2a	+	chr1	87555198	87555199
chr1	87884680	87884868	B3A	-	chr1	87884757	87884758
chr1	87934976	87935174	MIR	-	chr1	87935083	87935084
chr1	88449797	88450613	L1MEc	-	chr1	88450057	88450058
chr1	88509927	88510277	MLT1A1	-	chr1	88510081	88510082
chr1	88567256	88567491	RMER20B	+	chr1	88567358	88567359
chr1	88580932	88581084	RSINE1	-	chr1	88581080	88581081
chr1	91235402	91235873	RMER6B	-	chr1	91235746	91235747
chr1	91299110	91299207	PB1D10	+	chr1	91299205	91299206
chr1	92216641	92216833	ID_B1	-	chr1	92216789	92216790
chr1	92251095	92251214	MLT2B3	-	chr1	92251108	92251109
chr1	92679032	92679243	L1ME3G	+	chr1	92679085	92679086
chr1	93653928	93654404	MT2B1	-	chr1	93654161	93654162
chr1	94502828	94503072	MamTip2b	+	chr1	94503012	94503013
chr1	94582027	94582420	MTD	-	chr1	94582201	94582202
chr1	95380933	95381300	UCON29	+	chr1	95381289	95381290
chr1	95398579	95398876	RMER6C	-	chr1	95398609	95398610
chr1	95399770	95399957	B3	+	chr1	95399840	95399841
chr1	95644273	95644453	MIR3	-	chr1	95644300	95644301
chr1	95650328	95651386	Lx10	+	chr1	95650904	95650905
chr1	95690262	95692228	L1MdFanc_II	-	chr1	95691696	95691697
chr1	95748958	95749410	RLTR30D2_MM	+	chr1	95749219	95749220
chr1	97667407	97667934	MLTR31D_MM	+	chr1	97667881	97667882
chr1	97672966	97673155	LX3	+	chr1	97673030	97673031
chr1	105170939	105171208	ORR1D1-int	-	chr1	105171099	105171100
chr1	105435146	105435314	ERVB4_1B-LTR_MM	-	chr1	105435213	105435214
chr1	105544472	105544620	B1_Mus1	+	chr1	105544550	105544551
chr1	105924923	105925385	MT2A	+	chr1	105925014	105925015
chr1	105932433	105932740	RMER17C-int	+	chr1	105932617	105932618
chr1	105965260	105965658	MLT1A1	+	chr1	105965340	105965341
chr1	105966609	105968379	Lx9	+	chr1	105967732	105967733
chr1	106345454	106345548	L1MdF_III	+	chr1	106345481	106345482
chr1	106628300	106628739	RCHARR1	+	chr1	106628438	106628439
chr1	106775353	106775727	MTD	+	chr1	106775588	106775589
chr1	106918345	106918610	RLTR30B_MM	-	chr1	106918513	106918514
chr1	107389749	107389987	MIR	-	chr1	107389886	107389887
chr1	118368051	118368220	B2_Mm2	-	chr1	118368126	118368127
chr1	119917254	119917710	RLTR14_RN	-	chr1	119917575	119917576
chr1	120057175	120057260	HAL1	+	chr1	120057236	120057237
chr1	121430725	121430825	ID_B1	+	chr1	121430755	121430756
chr1	121483190	121483276	B2_Mm2	+	chr1	121483275	121483276
chr1	125395613	125395986	L1MC4	+	chr1	125395717	125395718
chr1	125462851	125463060	MTD	+	chr1	125463055	125463056
chr1	127086157	127086826	Lx9	+	chr1	127086244	127086245
chr1	127981921	127982241	B4A	-	chr1	127982172	127982173
chr1	128004523	128004781	B4A	+	chr1	128004568	128004569
chr1	128068965	128069438	RLTR30D_RN	-	chr1	128069268	128069269
chr1	128072467	128072600	RSINE1	+	chr1	128072502	128072503
chr1	128512184	128512308	B2_Mm2	-	chr1	128512227	128512228
chr1	128548813	128549034	L1MB2	+	chr1	128548851	128548852
chr1	128724581	128724711	MIR3	+	chr1	128724669	128724670
chr1	128825088	128825297	B4	-	chr1	128825292	128825293
chr1	131141498	131142086	MLT1F-int	-	chr1	131141603	131141604
chr1	131365951	131366247	ORR1E	-	chr1	131366126	131366127
chr1	131387046	131387404	L1MB7	-	chr1	131387235	131387236
chr1	131691490	131691634	MIRb	-	chr1	131691562	131691563
chr1	131915727	131915980	L3	+	chr1	131915928	131915929
chr1	132080622	132081009	MTE2a	-	chr1	132080692	132080693
chr1	132098012	132098398	MTD	-	chr1	132098257	132098258
chr1	132264667	132264865	L2c	-	chr1	132264789	132264790
chr1	134154761	134154945	B2_Mm2	-	chr1	134154884	134154885
chr1	134679375	134679522	B3	+	chr1	134679459	134679460
chr1	135703997	135704129	L1MEc	-	chr1	135704009	135704010
chr1	136609591	136609996	ORR1A3-int	+	chr1	136609676	136609677
chr1	136689692	136689884	B2_Mm2	-	chr1	136689841	136689842
chr1	136744453	136744608	B2_Mm1t	-	chr1	136744522	136744523
chr1	137751243	137751857	L1M3d	+	chr1	137751756	137751757
chr1	138137802	138138014	ID_B1	+	chr1	138137919	138137920
chr1	138313660	138316686	L1Lx_IV	+	chr1	138314281	138314282
chr1	138517133	138517246	ID_B1	+	chr1	138517200	138517201
chr1	139407821	139408010	B3A	-	chr1	139407920	139407921
chr1	142695285	142695412	AmnSINE1	+	chr1	142695408	142695409
chr1	143764554	143764745	B2_Mm2	-	chr1	143764679	143764680
chr1	143788950	143789154	B3	-	chr1	143789077	143789078
chr1	143850165	143851095	L1_Mur3	-	chr1	143850260	143850261
chr1	144268065	144268168	B4A	-	chr1	144268131	144268132
chr1	144343615	144343695	MTD	-	chr1	144343644	144343645
chr1	149946264	149946372	PB1D9	+	chr1	149946291	149946292
chr1	150374294	150374505	B2_Mm2	+	chr1	150374386	150374387
chr1	150395820	150396075	RMER6B	+	chr1	150396031	150396032
chr1	150470094	150470284	MLT1J1	+	chr1	150470215	150470216
chr1	150496812	150497127	ORR1F	-	chr1	150496824	150496825
chr1	150506005	150506285	L2b	+	chr1	150506154	150506155
chr1	151039268	151039457	MIR1_Amn	-	chr1	151039332	151039333
chr1	151104825	151105105	L1Lx_III	-	chr1	151105083	151105084
chr1	151625274	151625986	L1ME3Cz	+	chr1	151625871	151625872
chr1	151682830	151683113	L3	-	chr1	151683023	151683024
chr1	151803710	151803899	B2_Mm2	+	chr1	151803802	151803803
chr1	152429761	152430339	L1M3	+	chr1	152430109	152430110
chr1	152528841	152529030	L1MEd	+	chr1	152529022	152529023
chr1	153415112	153415263	RSINE1	-	chr1	153415175	153415176
chr1	153749294	153749574	MER90	+	chr1	153749515	153749516
chr1	153838734	153838832	PB1D10	+	chr1	153838764	153838765
chr1	155070532	155070616	PB1D7	+	chr1	155070574	155070575
chr1	155483606	155484099	L2c	-	chr1	155483894	155483895
chr1	156344506	156344987	RLTR30B_MM	+	chr1	156344552	156344553
chr1	156471683	156471878	RSINE1	+	chr1	156471726	156471727
chr1	156533569	156533783	MTD	-	chr1	156533638	156533639
chr1	157017632	157017955	LTR79	-	chr1	157017675	157017676
chr1	157019572	157019995	RMER16_Mm	-	chr1	157019893	157019894
chr1	157048245	157048422	X12_DNA	-	chr1	157048300	157048301
chr1	159305049	159305445	MTD	-	chr1	159305106	159305107
chr1	160041293	160041564	X7C_LINE	-	chr1	160041534	160041535
chr1	160811930	160812933	L2a	-	chr1	160812045	160812046
chr1	161076257	161076407	B1F2	-	chr1	161076313	161076314
chr1	161214578	161214750	B2_Mm2	-	chr1	161214695	161214696
chr1	161398195	161398385	B2_Mm2	+	chr1	161398275	161398276
chr1	161497430	161497603	MIRb	+	chr1	161497472	161497473
chr1	161560529	161560652	L2a	-	chr1	161560532	161560533
chr1	162518153	162518364	MLT1J	-	chr1	162518354	162518355
chr1	162549989	162550148	B2_Mm2	-	chr1	162550058	162550059
chr1	164089698	164090406	L1M2	+	chr1	164090227	164090228
chr1	164123979	164124071	ORSL	+	chr1	164124060	164124061
chr1	165133930	165134212	L1MB7	+	chr1	165133983	165133984
chr1	165388948	165389168	B3	-	chr1	165389085	165389086
chr1	166751191	166751450	L1M3	-	chr1	166751244	166751245
chr1	166787873	166788187	LTR78B	+	chr1	166788073	166788074
chr1	166802359	166802533	ORR1F	+	chr1	166802476	166802477
chr1	170160289	170160737	L1MEg1	+	chr1	170160706	170160707
chr1	170545482	170545619	L1MC4	+	chr1	170545496	170545497
chr1	170845839	170846346	RMER4B	+	chr1	170846071	170846072
chr1	170853838	170853908	B1F	+	chr1	170853885	170853886
chr1	170863386	170863724	L1MC2	+	chr1	170863417	170863418
chr1	170903393	170903666	LTR78	-	chr1	170903559	170903560
chr1	170952777	170953374	HAL1	+	chr1	170953095	170953096
chr1	170998601	170998737	MER5A	+	chr1	170998608	170998609
chr1	171050890	171051158	L2a	-	chr1	171051015	171051016
chr1	171211002	171211055	B3A	+	chr1	171211015	171211016
chr1	171223394	171223559	B2_Mm2	+	chr1	171223437	171223438
chr1	171409915	171410092	B2_Mm2	+	chr1	171409973	171409974
chr1	171453055	171453166	L2b	-	chr1	171453079	171453080
chr1	171466704	171466838	B1_Mur1	-	chr1	171466749	171466750
chr1	171466720	171466927	ORR1B1-int	-	chr1	171466749	171466750
chr1	171502517	171502625	B3	-	chr1	171502611	171502612
chr1	171619114	171619310	RMER19B	+	chr1	171619297	171619298
chr1	171660521	171661158	MER77B	-	chr1	171660618	171660619
chr1	171661393	171661704	MLT1A0	-	chr1	171661615	171661616
chr1	171827756	171827901	MLT1A0	+	chr1	171827808	171827809
chr1	172566258	172566601	ORR1F	-	chr1	172566370	172566371
chr1	172643655	172644649	MLT1H2-int	+	chr1	172643852	172643853
chr1	172711629	172711897	Lx8	+	chr1	172711632	172711633
chr1	173430416	173430753	ORR1F	+	chr1	173430575	173430576
chr1	173452391	173452637	L2a	-	chr1	173452482	173452483
chr1	173537886	173538362	RLTR30D_MM	-	chr1	173538122	173538123
chr1	173628382	173628857	RLTR30D_MM	+	chr1	173628545	173628546
chr1	173690581	173697473	ERVB2_1-I_MM	+	chr1	173694464	173694465
chr1	173809283	173809579	Lx5	-	chr1	173809513	173809514
chr1	173873439	173873603	B2_Mm2	+	chr1	173873498	173873499
chr1	175626089	175626272	B2_Mm2	-	chr1	175626205	175626206
chr1	175652006	175652089	PB1D11	-	chr1	175652081	175652082
chr1	175652008	175652103	ID_B1	-	chr1	175652081	175652082
chr1	176705634	176705698	MER57E1	-	chr1	176705654	176705655
chr1	176816813	176817189	MLTR11B	-	chr1	176816905	176816906
chr1	176824101	176824216	LTR82A	+	chr1	176824151	176824152
chr1	177191701	177191946	Lx6	-	chr1	177191778	177191779
chr1	177513836	177513916	ID4	+	chr1	177513897	177513898
chr1	177643997	177644059	ID4	+	chr1	177643997	177643998
chr1	178242181	178242353	B2_Mm2	+	chr1	178242223	178242224
chr1	178655881	178656064	MER58A	+	chr1	178656000	178656001
chr1	179507039	179507218	B2_Mm2	-	chr1	179507155	179507156
chr1	179842505	179842814	MLT1N2	+	chr1	179842798	179842799
chr1	180263496	180263720	L1M5	+	chr1	180263603	180263604
chr1	180536778	180537041	ORR1E	-	chr1	180536866	180536867
chr1	180698222	180698371	B3A	-	chr1	180698297	180698298
chr1	180973876	180974000	L4_B_Mam	+	chr1	180973941	180973942
chr1	181164943	181165049	B1_Mus1	-	chr1	181164982	181164983
chr1	181310687	181311398	HERV16-int	+	chr1	181310957	181310958
chr1	182304776	182305740	Lx6	+	chr1	182305129	182305130
chr1	184063095	184063317	RLTR12A	+	chr1	184063140	184063141
chr1	184274635	184274957	MTC	+	chr1	184274862	184274863
chr1	191000051	191000318	MTEb	-	chr1	191000151	191000152
chr1	191197914	191198156	Lx8	+	chr1	191197970	191197971
chr1	191592357	191592809	Charlie1	-	chr1	191592594	191592595
chr1	191661177	191661634	RLTR28B	-	chr1	191661335	191661336
chr1	191712190	191712529	RLTR31C_MM	-	chr1	191712391	191712392
chr1	192763004	192763127	MTE2b	+	chr1	192763125	192763126
chr1	194729729	194730064	L1MB8	+	chr1	194729924	194729925
chr1	194985869	194986263	ORR1C1	+	chr1	194985909	194985910
chr10	4430281	4430775	L2	+	chr10	4430523	4430524
chr10	4787020	4787371	MLT1B	-	chr10	4787257	4787258
chr10	5272117	5272216	ORR1F	+	chr10	5272189	5272190
chr10	5887297	5887442	Lx5b	-	chr10	5887415	5887416
chr10	7011067	7011178	PB1D11	-	chr10	7011159	7011160
chr10	7960960	7961133	MTEa	+	chr10	7961048	7961049
chr10	8066983	8067363	Lx8	-	chr10	8067137	8067138
chr10	8250141	8250355	L1M1	-	chr10	8250275	8250276
chr10	8369958	8370286	HAL1	+	chr10	8370202	8370203
chr10	8520397	8520828	MTD	+	chr10	8520705	8520706
chr10	8811722	8811990	L1MC4	+	chr10	8811822	8811823
chr10	8832753	8833147	RLTR23	+	chr10	8832821	8832822
chr10	9880085	9882000	L1Lx_IV	+	chr10	9880566	9880567
chr10	9880085	9882000	L1Lx_IV	+	chr10	9881870	9881871
chr10	10654510	10655207	L1M2	+	chr10	10654902	10654903
chr10	12473536	12473888	MLT1D	-	chr10	12473591	12473592
chr10	12954810	12955006	B2_Mm2	-	chr10	12954950	12954951
chr10	12958567	12958737	L2d	-	chr10	12958668	12958669
chr10	12992647	12993765	L1_Rod	+	chr10	12993675	12993676
chr10	13635705	13636762	Lx7	+	chr10	13636234	13636235
chr10	13870698	13870846	B3	-	chr10	13870785	13870786
chr10	13935737	13936311	Lx8b	-	chr10	13935836	13935837
chr10	14792497	14792590	PB1D9	-	chr10	14792582	14792583
chr10	15262366	15263102	ERVB2_1A-I_MM	-	chr10	15262481	15262482
chr10	15410665	15410895	ORR1G	+	chr10	15410728	15410729
chr10	16015346	16020683	L1MdFanc_I	+	chr10	16016186	16016187
chr10	16088352	16088530	B3	+	chr10	16088408	16088409
chr10	16652595	16653073	L1MCb	+	chr10	16652608	16652609
chr10	17220384	17221615	MER110-int	+	chr10	17221535	17221536
chr10	17415972	17416451	MLT1F	-	chr10	17416389	17416390
chr10	17613468	17613635	Arthur1B	-	chr10	17613479	17613480
chr10	17683920	17684736	Lx8	-	chr10	17684037	17684038
chr10	17691373	17692008	L1MB8	-	chr10	17691925	17691926
chr10	17788432	17788633	URR1B	-	chr10	17788627	17788628
chr10	18004993	18005437	RLTR31C_MM	-	chr10	18005302	18005303
chr10	18232925	18233074	B2_Mm2	-	chr10	18233003	18233004
chr10	18931843	18932182	ORR1E	+	chr10	18931994	18931995
chr10	19063278	19063529	L2c	+	chr10	19063339	19063340
chr10	19570158	19570224	L1MA6	-	chr10	19570174	19570175
chr10	19691672	19691904	HERV16-int	+	chr10	19691885	19691886
chr10	20040713	20041089	MTD	-	chr10	20040995	20040996
chr10	20314936	20315095	B2_Mm2	-	chr10	20315023	20315024
chr10	20534010	20534286	UCON26	-	chr10	20534066	20534067
chr10	20770667	20771065	ERVL-E-int	+	chr10	20770740	20770741
chr10	20835199	20835959	L1M3	-	chr10	20835383	20835384
chr10	20919274	20919975	RMER19B2	-	chr10	20919712	20919713
chr10	21889338	21889526	MIRb	-	chr10	21889485	21889486
chr10	24115278	24116304	RLTR13D4	+	chr10	24115912	24115913
chr10	24164138	24164213	Lx8b	+	chr10	24164187	24164188
chr10	24490536	24490625	MTC	+	chr10	24490607	24490608
chr10	24950373	24950558	MIRc	+	chr10	24950384	24950385
chr10	25318559	25318776	LTR33B	-	chr10	25318587	25318588
chr10	25321407	25321564	MER58B	-	chr10	25321433	25321434
chr10	26828532	26828699	L3b	+	chr10	26828561	26828562
chr10	26895820	26896098	L2a	-	chr10	26895973	26895974
chr10	30550071	30550275	L1MB7	+	chr10	30550221	30550222
chr10	31289778	31290526	L1MdFanc_II	+	chr10	31290247	31290248
chr10	31539349	31539978	L1MA8	-	chr10	31539595	31539596
chr10	31544495	31544951	MLTR11B	-	chr10	31544596	31544597
chr10	31563586	31564433	RMER19B	-	chr10	31563868	31563869
chr10	31600425	31600599	L2	+	chr10	31600459	31600460
chr10	34141607	34142609	L1MdV_III	+	chr10	34142149	34142150
chr10	37189574	37189792	MIR	+	chr10	37189605	37189606
chr10	37279311	37279549	MTE2a	-	chr10	37279353	37279354
chr10	37342610	37342870	MLT1K	-	chr10	37342646	37342647
chr10	37799282	37799582	L2c	+	chr10	37799547	37799548
chr10	39363286	39363605	MLT1J2	+	chr10	39363499	39363500
chr10	39435379	39435444	MER53	+	chr10	39435439	39435440
chr10	39436856	39437061	URR1A	+	chr10	39436904	39436905
chr10	40018932	40019529	MER57-int	+	chr10	40019426	40019427
chr10	40097232	40098155	MTD-int	+	chr10	40097522	40097523
chr10	40196317	40196529	B3	+	chr10	40196415	40196416
chr10	40357938	40358080	ORR1B1-int	+	chr10	40358062	40358063
chr10	40357954	40358081	B1_Mur1	+	chr10	40358062	40358063
chr10	40529729	40529885	B3	+	chr10	40529794	40529795
chr10	41505717	41505845	B2_Mm2	-	chr10	41505731	41505732
chr10	41570955	41571656	L2	+	chr10	41571180	41571181
chr10	42713049	42713431	RLTR24B_MM	+	chr10	42713113	42713114
chr10	43342262	43342407	ID_B1	-	chr10	43342285	43342286
chr10	43758512	43758774	MTD	-	chr10	43758522	43758523
chr10	43855843	43856225	Lx8b	+	chr10	43856192	43856193
chr10	44728881	44729311	L4_C_Mam	+	chr10	44728971	44728972
chr10	45203514	45204747	L1MdFanc_II	-	chr10	45204608	45204609
chr10	50436693	50437155	RMER6B	-	chr10	50436840	50436841
chr10	50690399	50690625	MTB_Mm	-	chr10	50690496	50690497
chr10	50702462	50702733	MTD	+	chr10	50702537	50702538
chr10	50852713	50853181	Lx3C	+	chr10	50852991	50852992
chr10	51422259	51423355	RLTR13D3	-	chr10	51422794	51422795
chr10	51451797	51454034	L1MdV_II	+	chr10	51453633	51453634
chr10	51520090	51520290	Lx9	+	chr10	51520245	51520246
chr10	51526260	51526514	LTRIS2	+	chr10	51526378	51526379
chr10	51527994	51528041	RLTR1B-int	+	chr10	51528030	51528031
chr10	51530980	51531185	LTRIS2	+	chr10	51531017	51531018
chr10	53374000	53374605	L2a	+	chr10	53374552	53374553
chr10	53505327	53505527	MIR	+	chr10	53505493	53505494
chr10	54119099	54120199	L2a	+	chr10	54119435	54119436
chr10	56106611	56106786	MTD	+	chr10	56106750	56106751
chr10	56795405	56795655	ORR1G	-	chr10	56795523	56795524
chr10	56930142	56930578	L1M3d	-	chr10	56930196	56930197
chr10	57734078	57734435	MTEb	-	chr10	57734108	57734109
chr10	57747880	57748319	RLTR24	-	chr10	57748182	57748183
chr10	57836072	57836392	ORR1D2	+	chr10	57836119	57836120
chr10	58331354	58331777	L1_Rod	+	chr10	58331369	58331370
chr10	58359081	58359225	RSINE1	-	chr10	58359149	58359150
chr10	58405917	58406248	ORR1E	+	chr10	58406066	58406067
chr10	59327777	59327961	B3	-	chr10	59327935	59327936
chr10	60033627	60033799	B2_Mm2	-	chr10	60033691	60033692
chr10	60262376	60262465	PB1D10	-	chr10	60262447	60262448
chr10	60296859	60296993	L1MC	-	chr10	60296982	60296983
chr10	61151409	61151602	B2_Mm2	-	chr10	61151552	61151553
chr10	61675995	61676511	RLTR30E_MM	+	chr10	61676121	61676122
chr10	62311393	62311447	PB1D7	-	chr10	62311446	62311447
chr10	62323561	62324187	Lx5b	+	chr10	62323895	62323896
chr10	62326056	62326202	B4	+	chr10	62326181	62326182
chr10	62326085	62326206	B1_Mur2	+	chr10	62326181	62326182
chr10	62386313	62386432	B1F2	-	chr10	62386417	62386418
chr10	62501031	62501096	ID4	-	chr10	62501074	62501075
chr10	62509089	62509488	MTE2a	+	chr10	62509374	62509375
chr10	62543076	62543494	MTC	+	chr10	62543471	62543472
chr10	62974998	62975161	B2_Mm2	+	chr10	62975001	62975002
chr10	63008277	63008460	B2_Mm2	+	chr10	63008323	63008324
chr10	63244876	63245059	B3	-	chr10	63244998	63244999
chr10	63257679	63257779	PB1D9	+	chr10	63257723	63257724
chr10	63281664	63281773	L1M4c	-	chr10	63281697	63281698
chr10	63300200	63300311	B1_Mur1	-	chr10	63300228	63300229
chr10	66851870	66852143	B4	-	chr10	66852135	66852136
chr10	66852613	66852838	MLTR14	-	chr10	66852833	66852834
chr10	66920344	66920383	IAPEY5_I-int	-	chr10	66920372	66920373
chr10	66953371	66953898	L1M5	+	chr10	66953482	66953483
chr10	67025556	67025788	MTD	+	chr10	67025769	67025770
chr10	67115327	67115465	MT2B	+	chr10	67115332	67115333
chr10	67145170	67145306	B1_Mur4	-	chr10	67145300	67145301
chr10	67209940	67210331	MTC	-	chr10	67210185	67210186
chr10	67388030	67388429	MTB	+	chr10	67388407	67388408
chr10	67430720	67431418	Charlie5	+	chr10	67431073	67431074
chr10	67607387	67607588	LTR33	+	chr10	67607515	67607516
chr10	67625309	67625771	MTD	+	chr10	67625541	67625542
chr10	67628988	67629251	MLT1L	+	chr10	67629099	67629100
chr10	68063396	68063825	Charlie2a	-	chr10	68063614	68063615
chr10	68085765	68085952	L2b	+	chr10	68085798	68085799
chr10	68091865	68092171	L2b	+	chr10	68091922	68091923
chr10	68377772	68378547	L1MB8	-	chr10	68378194	68378195
chr10	69185590	69185784	B3	+	chr10	69185640	69185641
chr10	74919219	74919690	RLTR30E_MM	-	chr10	74919553	74919554
chr10	75491868	75492319	RMER6B	-	chr10	75492145	75492146
chr10	75883866	75884058	B2_Mm2	+	chr10	75883910	75883911
chr10	76290119	76290481	MTD	+	chr10	76290411	76290412
chr10	76351954	76352309	ORR1E	+	chr10	76352053	76352054
chr10	77202378	77203012	L1MD3	-	chr10	77202848	77202849
chr10	77536681	77537058	MTD	+	chr10	77536986	77536987
chr10	77626681	77626918	L1ME3G	-	chr10	77626908	77626909
chr10	77713871	77714076	MTE-int	-	chr10	77713920	77713921
chr10	77728398	77728581	B2_Mm2	-	chr10	77728539	77728540
chr10	77753571	77753750	B2_Mm2	+	chr10	77753641	77753642
chr10	77962691	77963016	L1MDa	+	chr10	77962854	77962855
chr10	78015236	78015723	HAL1	-	chr10	78015669	78015670
chr10	78105248	78105934	L1M3	+	chr10	78105713	78105714
chr10	78226991	78227197	B3	+	chr10	78227026	78227027
chr10	78392340	78392527	LTR50	-	chr10	78392435	78392436
chr10	78420062	78420236	B2_Mm2	+	chr10	78420065	78420066
chr10	78481039	78481138	ID_B1	-	chr10	78481128	78481129
chr10	79416676	79417262	IAPEY3-int	-	chr10	79417258	79417259
chr10	79500738	79507081	MMERGLN-int	-	chr10	79506785	79506786
chr10	79817218	79817403	B2_Mm2	+	chr10	79817317	79817318
chr10	79889638	79889729	B1F2	-	chr10	79889643	79889644
chr10	79961392	79961579	MTE2a	-	chr10	79961424	79961425
chr10	80222797	80223005	RLTR13D4	+	chr10	80222805	80222806
chr10	80751602	80751888	MLT2D	-	chr10	80751673	80751674
chr10	80762988	80763171	B3	-	chr10	80763031	80763032
chr10	80818054	80818242	B2_Mm1t	+	chr10	80818092	80818093
chr10	81550143	81550277	PB1D7	+	chr10	81550255	81550256
chr10	81550201	81550331	L2a	-	chr10	81550255	81550256
chr10	82923602	82923731	MTEa	+	chr10	82923664	82923665
chr10	82953325	82953768	RLTR35B_MM	-	chr10	82953600	82953601
chr10	82958510	82958986	MLTR14	+	chr10	82958613	82958614
chr10	83168465	83168772	MLT1D	-	chr10	83168545	83168546
chr10	83375690	83376576	RLTR13B1	-	chr10	83376062	83376063
chr10	83511055	83511879	L1MB7	+	chr10	83511534	83511535
chr10	83922005	83922292	MTE2a	+	chr10	83922198	83922199
chr10	83979990	83980182	B3A	-	chr10	83980119	83980120
chr10	84975153	84976100	MTEa-int	-	chr10	84975543	84975544
chr10	87732053	87732330	L2d	+	chr10	87732232	87732233
chr10	87842209	87842928	Lx8	-	chr10	87842728	87842729
chr10	87961021	87961167	L1M4	-	chr10	87961077	87961078
chr10	88333895	88333951	ORR1D1-int	+	chr10	88333928	88333929
chr10	88333901	88334007	PB1D7	+	chr10	88333928	88333929
chr10	88383344	88383773	RMER10A	-	chr10	88383743	88383744
chr10	88420591	88420727	B1F2	-	chr10	88420712	88420713
chr10	88513601	88514063	RLTR30B_MM	+	chr10	88513657	88513658
chr10	89470914	89471322	RLTR25A	+	chr10	89470981	89470982
chr10	89696384	89696579	B2_Mm2	+	chr10	89696397	89696398
chr10	89767078	89767156	B3A	+	chr10	89767093	89767094
chr10	90982976	90983425	Lx8	+	chr10	90983267	90983268
chr10	91060858	91061256	MER21B	+	chr10	91061001	91061002
chr10	91065368	91065779	L1M2c	-	chr10	91065580	91065581
chr10	91192053	91192618	L1ME4b	-	chr10	91192301	91192302
chr10	91206658	91206944	Lx8	+	chr10	91206826	91206827
chr10	91210107	91210301	MTD	-	chr10	91210168	91210169
chr10	91300178	91300725	MER89	+	chr10	91300241	91300242
chr10	93070619	93070807	B3	-	chr10	93070787	93070788
chr10	93171096	93171489	ORR1E	+	chr10	93171268	93171269
chr10	93175214	93175829	L1MC3	+	chr10	93175486	93175487
chr10	93177672	93178102	MER110A	-	chr10	93178097	93178098
chr10	93436874	93437147	MLT1A	-	chr10	93437011	93437012
chr10	93949884	93950331	RLTR30C_MM	-	chr10	93950254	93950255
chr10	94354399	94354459	L1M4	-	chr10	94354414	94354415
chr10	94638854	94639016	MER21B	-	chr10	94638879	94638880
chr10	95151114	95151446	MTEb	+	chr10	95151388	95151389
chr10	95300343	95300646	ORR1E	+	chr10	95300397	95300398
chr10	95367389	95368063	L1_Mur3	+	chr10	95367963	95367964
chr10	95677694	95677980	Tigger12	+	chr10	95677704	95677705
chr10	95952021	95952384	RLTR31C_MM	-	chr10	95952280	95952281
chr10	96291599	96292085	MLT1D	+	chr10	96291848	96291849
chr10	96294665	96295172	MLTR14	+	chr10	96294858	96294859
chr10	96328485	96328803	ORR1D2	-	chr10	96328652	96328653
chr10	96332341	96332553	MER102b	+	chr10	96332485	96332486
chr10	96374314	96374772	L1MCa	+	chr10	96374434	96374435
chr10	96438445	96438761	MER45B	+	chr10	96438724	96438725
chr10	97282847	97283233	MER121	+	chr10	97282897	97282898
chr10	98813163	98813305	B1_Mus1	+	chr10	98813243	98813244
chr10	98880454	98881137	L2a	+	chr10	98880861	98880862
chr10	99081715	99082156	ERVL-E-int	+	chr10	99081742	99081743
chr10	99190924	99191074	B3	-	chr10	99190982	99190983
chr10	99393657	99393866	Tigger19b	+	chr10	99393797	99393798
chr10	99713208	99713485	RLTR51B_Mm	+	chr10	99713448	99713449
chr10	100082321	100082964	L1MEf	-	chr10	100082850	100082851
chr10	107952455	107952854	LTR109A2	-	chr10	107952667	107952668
chr10	108140894	108141096	MLT1F	-	chr10	108140918	108140919
chr10	110793594	110793907	MLT1I	+	chr10	110793627	110793628
chr10	111119328	111119560	L2	+	chr10	111119476	111119477
chr10	111127559	111127744	MIR	-	chr10	111127603	111127604
chr10	111257341	111257618	B4	-	chr10	111257527	111257528
chr10	111564150	111564577	RMER10A	-	chr10	111564403	111564404
chr10	115315905	115315978	L2b	+	chr10	115315975	115315976
chr10	115326849	115326952	RSINE1	+	chr10	115326870	115326871
chr10	115328411	115328858	MER70B	-	chr10	115328714	115328715
chr10	116531203	116531389	B2_Mm2	-	chr10	116531355	116531356
chr10	116944260	116944439	B2_Mm2	-	chr10	116944373	116944374
chr10	117088142	117088322	B2_Mm2	-	chr10	117088268	117088269
chr10	117363199	117363389	B2_Mm2	-	chr10	117363318	117363319
chr10	117692263	117692441	B2_Mm2	+	chr10	117692330	117692331
chr10	117836457	117836648	B3A	+	chr10	117836538	117836539
chr10	118011871	118012165	L2d	-	chr10	118011998	118011999
chr10	118130970	118131126	B2_Mm2	+	chr10	118131032	118131033
chr10	118585822	118586189	MTEb	-	chr10	118586021	118586022
chr10	118661614	118661910	MTD	-	chr10	118661626	118661627
chr10	118709400	118709801	MTB	-	chr10	118709409	118709410
chr10	119037867	119038427	MER34A	+	chr10	119037985	119037986
chr10	120270882	120271099	B3	+	chr10	120270927	120270928
chr10	120541710	120541803	L3	+	chr10	120541726	120541727
chr10	120580275	120580638	Kanga1a	+	chr10	120580581	120580582
chr10	120808346	120808502	L1M3	-	chr10	120808401	120808402
chr10	121614069	121614159	PB1D10	-	chr10	121614134	121614135
chr10	122801523	122801682	B2_Mm2	+	chr10	122801623	122801624
chr10	123057179	123057353	B2_Mm2	+	chr10	123057217	123057218
chr10	123085357	123085744	RLTR4_MM-int	-	chr10	123085500	123085501
chr10	123184029	123184199	PB1D10	-	chr10	123184043	123184044
chr10	126813290	126813460	B2_Mm2	+	chr10	126813314	126813315
chr10	126876135	126876330	B2_Mm2	+	chr10	126876205	126876206
chr10	126987971	126988079	ID4	+	chr10	126988050	126988051
chr10	126988024	126988144	B2_Mm2	+	chr10	126988050	126988051
chr10	127127852	127128685	L1MC5a	+	chr10	127128069	127128070
chr10	127131489	127131584	PB1D7	+	chr10	127131571	127131572
chr10	127134553	127134723	B2_Mm2	-	chr10	127134640	127134641
chr10	127218155	127218663	RLTR31C_MM	-	chr10	127218659	127218660
chr10	127561235	127561424	B2_Mm2	+	chr10	127561313	127561314
chr10	127623423	127623621	B2_Mm2	+	chr10	127623611	127623612
chr10	127671613	127671788	B2_Mm2	-	chr10	127671717	127671718
chr10	127937320	127937484	L4_B_Mam	-	chr10	127937474	127937475
chr10	128026089	128026274	B2_Mm2	+	chr10	128026154	128026155
chr10	128080623	128080813	B2_Mm2	+	chr10	128080687	128080688
chr10	128258934	128259927	Lx8	+	chr10	128259094	128259095
chr10	128528735	128528877	B3A	-	chr10	128528779	128528780
chr10	128528747	128529023	ID_B1	-	chr10	128528779	128528780
chr10	128535348	128535585	ORR1C2	+	chr10	128535353	128535354
chr10	128902352	128902554	B3	-	chr10	128902498	128902499
chr11	3105488	3111982	IAPLTR3-int	+	chr11	3105673	3105674
chr11	3456470	3456667	B3	-	chr11	3456625	3456626
chr11	4202421	4202617	B3	-	chr11	4202572	4202573
chr11	4460880	4461649	RMER21B	-	chr11	4460882	4460883
chr11	4536797	4536899	PB1D10	-	chr11	4536842	4536843
chr11	4826593	4826966	L2c	-	chr11	4826727	4826728
chr11	5653102	5656148	L1MdMus_II	+	chr11	5654093	5654094
chr11	6392366	6393218	L1MD1	-	chr11	6392988	6392989
chr11	6560479	6560623	MIR3	-	chr11	6560525	6560526
chr11	8618601	8619003	L1MEc	+	chr11	8618669	8618670
chr11	8759886	8760107	ORR1D2	+	chr11	8760039	8760040
chr11	9055576	9055747	Lx7	+	chr11	9055637	9055638
chr11	11547941	11548201	UCON26	-	chr11	11548034	11548035
chr11	11558824	11558928	L2a	-	chr11	11558831	11558832
chr11	11724670	11724766	PB1D10	+	chr11	11724674	11724675
chr11	11765078	11765534	HAL1b	-	chr11	11765263	11765264
chr11	16875365	16875682	ORR1E	+	chr11	16875607	16875608
chr11	16932130	16932315	MLT1A	-	chr11	16932305	16932306
chr11	16969778	16969851	MTD	+	chr11	16969825	16969826
chr11	16983428	16983985	Lx8	+	chr11	16983436	16983437
chr11	17000852	17001423	RMER19C	+	chr11	17001113	17001114
chr11	17005057	17005190	RSINE1	+	chr11	17005123	17005124
chr11	19135814	19136016	Lx8b	-	chr11	19135842	19135843
chr11	20105706	20105847	B2_Mm2	+	chr11	20105787	20105788
chr11	20144192	20144334	B1_Mur3	-	chr11	20144320	20144321
chr11	20176069	20176187	PB1D10	+	chr11	20176152	20176153
chr11	20209256	20209435	B2_Mm2	-	chr11	20209433	20209434
chr11	20805863	20806107	ORR1D2	+	chr11	20806103	20806104
chr11	21096588	21097079	Lx8	+	chr11	21096616	21096617
chr11	21114384	21115464	L1MB7	-	chr11	21114698	21114699
chr11	21237011	21237390	MTD	+	chr11	21237325	21237326
chr11	21867660	21867797	B1_Mus2	+	chr11	21867757	21867758
chr11	22156640	22157427	Lx8b	+	chr11	22157331	22157332
chr11	22532026	22533893	Lx	+	chr11	22533160	22533161
chr11	22652651	22653127	L1ME1	-	chr11	22653102	22653103
chr11	22850140	22850310	ID_B1	+	chr11	22850203	22850204
chr11	22871900	22872115	MIR1_Amn	-	chr11	22872003	22872004
chr11	22928927	22929087	MTEa	+	chr11	22928936	22928937
chr11	23194219	23198581	L1MdFanc_I	+	chr11	23194536	23194537
chr11	23416588	23417022	L1MC4	-	chr11	23416771	23416772
chr11	26128266	26128685	L2b	-	chr11	26128584	26128585
chr11	26128870	26129305	BGLII	-	chr11	26129017	26129018
chr11	26139996	26140399	L1MA6	+	chr11	26140166	26140167
chr11	26451921	26452943	Lx8	+	chr11	26452790	26452791
chr11	26601626	26601823	B3	-	chr11	26601793	26601794
chr11	26604276	26604547	MTEa	-	chr11	26604356	26604357
chr11	29709621	29709818	B2_Mm2	-	chr11	29709685	29709686
chr11	29874832	29875275	RMER16	+	chr11	29874905	29874906
chr11	29986617	29989875	L1Lx_IV	+	chr11	29987218	29987219
chr11	30016753	30017293	RMER13A1	+	chr11	30016793	30016794
chr11	30224684	30224866	B3A	+	chr11	30224743	30224744
chr11	30244091	30244231	MER53	+	chr11	30244220	30244221
chr11	31075630	31079938	L1MdFanc_I	-	chr11	31077029	31077030
chr11	31735917	31736282	MTD	-	chr11	31736203	31736204
chr11	31825984	31826186	B3	-	chr11	31826105	31826106
chr11	32271153	32271473	L1M5	+	chr11	32271347	32271348
chr11	32489319	32489518	ID_B1	+	chr11	32489487	32489488
chr11	32605777	32605957	B2_Mm2	+	chr11	32605839	32605840
chr11	32607342	32607631	L1MEf	-	chr11	32607444	32607445
chr11	33660469	33660749	MER102c	+	chr11	33660687	33660688
chr11	34026802	34027191	MTB	-	chr11	34026956	34026957
chr11	34033800	34034175	MTE2a	+	chr11	34034121	34034122
chr11	34072292	34072343	MTD	-	chr11	34072295	34072296
chr11	34427815	34428041	ORR1F	+	chr11	34427977	34427978
chr11	34736999	34737584	L1_Mur3	+	chr11	34737207	34737208
chr11	43405658	43406139	MER34B-int	+	chr11	43405767	43405768
chr11	44414983	44415281	MTD	-	chr11	44415178	44415179
chr11	44476555	44476834	ORR1E	-	chr11	44476705	44476706
chr11	44478477	44478677	MER68	-	chr11	44478566	44478567
chr11	45735050	45735140	MIRb	-	chr11	45735051	45735052
chr11	46372427	46373340	L1MA4A	+	chr11	46373242	46373243
chr11	48900952	48901077	RMER15-int	+	chr11	48901021	48901022
chr11	48902553	48902764	B4	-	chr11	48902732	48902733
chr11	49237652	49237925	MTD	-	chr11	49237782	49237783
chr11	49580546	49580717	L1M3	-	chr11	49580618	49580619
chr11	49719791	49720063	ORR1F	-	chr11	49719987	49719988
chr11	49749078	49749264	RLTR25A	-	chr11	49749242	49749243
chr11	49983940	49984161	L1M4b	+	chr11	49984083	49984084
chr11	50133998	50134553	Arthur1	+	chr11	50134346	50134347
chr11	51889538	51890423	RMER19B	-	chr11	51889701	51889702
chr11	51931328	51931410	ID4	+	chr11	51931405	51931406
chr11	51938523	51939010	MLT1F	+	chr11	51938904	51938905
chr11	52005748	52005915	B3A	+	chr11	52005787	52005788
chr11	52338101	52338237	ID_B1	+	chr11	52338208	52338209
chr11	53314819	53314837	ORR1B1-int	+	chr11	53314829	53314830
chr11	53898347	53898480	L1M1	+	chr11	53898450	53898451
chr11	54160903	54161373	Lx9	+	chr11	54160916	54160917
chr11	54491964	54492761	L1MB3	-	chr11	54492254	54492255
chr11	54533857	54534206	RLTR14	-	chr11	54534094	54534095
chr11	54613892	54614222	MTE2a	-	chr11	54613947	54613948
chr11	54729417	54729808	ORR1C2	+	chr11	54729718	54729719
chr11	54766929	54767072	RSINE1	+	chr11	54767044	54767045
chr11	54807822	54807964	L1M7	+	chr11	54807837	54807838
chr11	54884438	54884618	B3	-	chr11	54884598	54884599
chr11	55013180	55013285	B4	+	chr11	55013209	55013210
chr11	55013204	55013381	B2_Mm2	+	chr11	55013209	55013210
chr11	55154574	55154989	MTC	+	chr11	55154866	55154867
chr11	58211423	58212581	RMER12	-	chr11	58211469	58211470
chr11	58214196	58214653	RLTR30D_MM	+	chr11	58214265	58214266
chr11	58959071	58959260	L1M3	+	chr11	58959205	58959206
chr11	58979216	58979445	MER34A	-	chr11	58979396	58979397
chr11	59229782	59229979	B3	-	chr11	59229931	59229932
chr11	59534430	59534990	RLTR28	+	chr11	59534471	59534472
chr11	59633136	59633529	ORR1D2	+	chr11	59633259	59633260
chr11	60042414	60042598	B2_Mm2	-	chr11	60042535	60042536
chr11	60309276	60309788	L1ME4c	+	chr11	60309643	60309644
chr11	60769331	60769605	MTD	-	chr11	60769517	60769518
chr11	60774016	60774070	PB1D10	+	chr11	60774069	60774070
chr11	60900668	60900837	MTEb	+	chr11	60900782	60900783
chr11	62435563	62435753	B2_Mm2	+	chr11	62435621	62435622
chr11	63051005	63051319	ORR1F	-	chr11	63051253	63051254
chr11	64654800	64656195	L1MCa	+	chr11	64655362	64655363
chr11	65759366	65760822	Lx7	+	chr11	65760759	65760760
chr11	65794308	65794660	MTD	+	chr11	65794483	65794484
chr11	67412724	67413201	ORR1F	-	chr11	67413177	67413178
chr11	67417692	67417893	B3	-	chr11	67417871	67417872
chr11	67469748	67469905	L1MB8	-	chr11	67469779	67469780
chr11	67499771	67500370	ORR1E-int	-	chr11	67499782	67499783
chr11	67564212	67564388	MER113A	-	chr11	67564372	67564373
chr11	67579237	67579601	L1M6	-	chr11	67579332	67579333
chr11	68706605	68707208	Charlie1a	+	chr11	68706751	68706752
chr11	68724202	68724402	B3	+	chr11	68724232	68724233
chr11	68839011	68839188	B2_Mm2	+	chr11	68839060	68839061
chr11	69666425	69666522	B1_Mus1	+	chr11	69666441	69666442
chr11	69692279	69692746	L2	+	chr11	69692438	69692439
chr11	69696097	69696252	MTD	-	chr11	69696103	69696104
chr11	69926838	69927010	B2_Mm2	-	chr11	69926899	69926900
chr11	70174873	70174956	Lx8	-	chr11	70174893	70174894
chr11	70185244	70185403	L1M2	-	chr11	70185316	70185317
chr11	70198323	70199004	RLTR19B	+	chr11	70198545	70198546
chr11	70306139	70306483	LTR73	+	chr11	70306407	70306408
chr11	70313942	70314125	B2_Mm2	-	chr11	70314095	70314096
chr11	70372478	70372684	MER63A	+	chr11	70372671	70372672
chr11	70787136	70788089	MLT-int	+	chr11	70787164	70787165
chr11	70791744	70791863	MIR1_Amn	-	chr11	70791744	70791745
chr11	70795357	70795742	MTB	+	chr11	70795732	70795733
chr11	70802758	70803168	MLT1D	-	chr11	70803166	70803167
chr11	70809477	70809723	Charlie20a	+	chr11	70809606	70809607
chr11	70848662	70848887	L1M5	-	chr11	70848847	70848848
chr11	71159577	71159884	ORR1F	+	chr11	71159615	71159616
chr11	71250980	71251443	RMER21A	+	chr11	71251069	71251070
chr11	72163247	72163555	L1ME2z	+	chr11	72163310	72163311
chr11	72466734	72467140	MER63B	-	chr11	72467134	72467135
chr11	72467125	72467236	MIRc	+	chr11	72467134	72467135
chr11	72697364	72697638	ORR1F	-	chr11	72697493	72697494
chr11	72837616	72837729	PB1D7	-	chr11	72837661	72837662
chr11	74529917	74530102	B3	+	chr11	74529927	74529928
chr11	74810241	74810426	B2_Mm2	-	chr11	74810422	74810423
chr11	74894615	74894787	B3	-	chr11	74894734	74894735
chr11	75106638	75107194	L2a	+	chr11	75106688	75106689
chr11	75585156	75585292	ID_B1	-	chr11	75585183	75585184
chr11	75587607	75587714	MIR	+	chr11	75587657	75587658
chr11	76789389	76789591	B3	-	chr11	76789525	76789526
chr11	76900092	76900448	LTR16C	+	chr11	76900169	76900170
chr11	76973718	76973909	B2_Mm2	-	chr11	76973850	76973851
chr11	77546398	77546577	B3	+	chr11	77546496	77546497
chr11	77558720	77558909	B2_Mm2	+	chr11	77558760	77558761
chr11	77673553	77673718	B2_Mm2	-	chr11	77673631	77673632
chr11	77697378	77697567	B2_Mm2	-	chr11	77697547	77697548
chr11	78040971	78041151	B2_Mm2	+	chr11	78041017	78041018
chr11	78475362	78475677	ORR1F	+	chr11	78475381	78475382
chr11	78558417	78558786	Lx8	-	chr11	78558541	78558542
chr11	78660636	78660996	ORR1C2	+	chr11	78660950	78660951
chr11	79252287	79252554	L3	-	chr11	79252483	79252484
chr11	79367435	79368736	MLT1A1-int	-	chr11	79368339	79368340
chr11	79707223	79707388	B2_Mm2	-	chr11	79707290	79707291
chr11	80009198	80009367	B2_Mm2	-	chr11	80009271	80009272
chr11	80098510	80098900	BGLII_Mus	-	chr11	80098830	80098831
chr11	80146007	80146100	MIRb	+	chr11	80146096	80146097
chr11	80185032	80185412	RLTR30D_MM	-	chr11	80185343	80185344
chr11	80186730	80187232	RLTR30C_MM	-	chr11	80187135	80187136
chr11	80216671	80217160	MER21C	-	chr11	80217103	80217104
chr11	80761849	80762028	MIRb	+	chr11	80762024	80762025
chr11	82041482	82042213	L1MA6	-	chr11	82042078	82042079
chr11	82098555	82100262	L1MB2	+	chr11	82099380	82099381
chr11	83039171	83039355	B2_Mm2	-	chr11	83039292	83039293
chr11	83045776	83046479	MMERVK10D3_I-int	+	chr11	83045886	83045887
chr11	83079413	83079781	RLTR30D2_MM	+	chr11	83079523	83079524
chr11	83082681	83083106	SRV_MM-int	-	chr11	83082982	83082983
chr11	83560487	83560833	ORR1D2	+	chr11	83560585	83560586
chr11	83566981	83567622	RLTR17	-	chr11	83567126	83567127
chr11	83619104	83619308	Lx8	-	chr11	83619217	83619218
chr11	83665166	83665564	Lx2B	-	chr11	83665428	83665429
chr11	83717222	83717561	MER77	-	chr11	83717312	83717313
chr11	83737385	83738214	L1MA5	+	chr11	83737510	83737511
chr11	84554966	84555121	RSINE1	+	chr11	84555033	84555034
chr11	85164150	85164620	L1MD3	-	chr11	85164341	85164342
chr11	85725203	85725846	L1MB2	-	chr11	85725724	85725725
chr11	86209157	86209606	RLTR41C	+	chr11	86209255	86209256
chr11	86479966	86480132	B2_Mm2	+	chr11	86479967	86479968
chr11	86581016	86581126	B1_Mus2	+	chr11	86581032	86581033
chr11	86670846	86671300	L2	+	chr11	86671004	86671005
chr11	87421835	87422034	RMER15	-	chr11	87422015	87422016
chr11	87421999	87422091	PB1D10	+	chr11	87422015	87422016
chr11	87989944	87990068	B3	-	chr11	87990004	87990005
chr11	88614414	88614553	MIR3	+	chr11	88614497	88614498
chr11	88828601	88828763	B2_Mm2	+	chr11	88828707	88828708
chr11	88875319	88875498	B2_Mm2	+	chr11	88875405	88875406
chr11	88875377	88875406	ID_B1	+	chr11	88875405	88875406
chr11	89006738	89006923	B2_Mm2	+	chr11	89006779	89006780
chr11	89028126	89028412	MLT1G1	-	chr11	89028164	89028165
chr11	89985015	89985198	B3A	+	chr11	89985195	89985196
chr11	90235458	90235834	ORR1E	+	chr11	90235482	90235483
chr11	90282309	90282461	B3A	+	chr11	90282311	90282312
chr11	93821590	93821938	ORR1F	-	chr11	93821725	93821726
chr11	94133534	94133674	L2	-	chr11	94133632	94133633
chr11	94317689	94317792	B3	+	chr11	94317735	94317736
chr11	94687324	94687669	L1MEi	+	chr11	94687384	94687385
chr11	94692633	94693031	MTB	-	chr11	94692743	94692744
chr11	95478927	95479113	B2_Mm2	-	chr11	95479033	95479034
chr11	95657032	95657212	L1M5	-	chr11	95657047	95657048
chr11	95657446	95657730	B4A	-	chr11	95657725	95657726
chr11	95728944	95729055	PB1D7	+	chr11	95729031	95729032
chr11	95978582	95978771	B2_Mm2	+	chr11	95978693	95978694
chr11	96793812	96794189	RMER6B	+	chr11	96793986	96793987
chr11	96796687	96796856	B2_Mm2	+	chr11	96796749	96796750
chr11	97192673	97192852	B2_Mm2	+	chr11	97192746	97192747
chr11	97401914	97402049	B1F	+	chr11	97401918	97401919
chr11	97555582	97555730	B1_Mus1	-	chr11	97555627	97555628
chr11	97651820	97651939	B1_Mus1	-	chr11	97651830	97651831
chr11	97777161	97777336	B2_Mm2	-	chr11	97777316	97777317
chr11	97793257	97793444	B2_Mm2	-	chr11	97793409	97793410
chr11	98369113	98369294	B3	+	chr11	98369139	98369140
chr11	98369137	98369164	ORR1A3-int	+	chr11	98369139	98369140
chr11	98660682	98660724	RLTR22_Mus	-	chr11	98660684	98660685
chr11	98889328	98889738	MTB_Mm	-	chr11	98889344	98889345
chr11	98948005	98948609	L1MB7	-	chr11	98948124	98948125
chr11	100588498	100588674	ID_B1	+	chr11	100588663	100588664
chr11	101000177	101000393	ID_B1	+	chr11	101000182	101000183
chr11	101001968	101002167	MLTR12	-	chr11	101002015	101002016
chr11	101450484	101450703	B3	+	chr11	101450613	101450614
chr11	101579420	101579561	L2	-	chr11	101579504	101579505
chr11	101759602	101760018	L1MB4	-	chr11	101759672	101759673
chr11	102427501	102427615	RMER15	-	chr11	102427599	102427600
chr11	103053318	103053450	B3	-	chr11	103053408	103053409
chr11	103146326	103146526	B2_Mm2	+	chr11	103146415	103146416
chr11	103399990	103400484	L1ME3	-	chr11	103400187	103400188
chr11	103413374	103413671	Lx5c	-	chr11	103413511	103413512
chr11	103606709	103607128	BGLII_Mus	+	chr11	103606787	103606788
chr11	103964186	103964405	MTD	-	chr11	103964203	103964204
chr11	103992951	103993065	PB1D10	-	chr11	103992954	103992955
chr11	104361684	104362135	RLTR19	+	chr11	104361948	104361949
chr11	105420069	105420464	Charlie4a	+	chr11	105420179	105420180
chr11	105475034	105476278	L1MdV_III	+	chr11	105475546	105475547
chr11	106497958	106498127	B2_Mm2	+	chr11	106498040	106498041
chr11	106623715	106623993	MLT1G1	+	chr11	106623823	106623824
chr11	106716601	106716932	L2c	+	chr11	106716782	106716783
chr11	106937475	106937598	MLT1L	-	chr11	106937515	106937516
chr11	107353542	107353943	L1MB7	-	chr11	107353731	107353732
chr11	107815026	107815331	LTR33A	+	chr11	107815199	107815200
chr11	108416401	108416553	B2_Mm2	+	chr11	108416481	108416482
chr11	108846057	108846235	MER58A	-	chr11	108846166	108846167
chr11	109100238	109100809	L1M2	-	chr11	109100437	109100438
chr11	109219046	109219144	L1ME3G	+	chr11	109219132	109219133
chr11	109247001	109247446	L1MB8	+	chr11	109247190	109247191
chr11	109301521	109301578	LTR33	-	chr11	109301522	109301523
chr11	109369775	109369895	B1F1	+	chr11	109369823	109369824
chr11	109393700	109393912	B3	-	chr11	109393783	109393784
chr11	109424434	109424735	L1MC4a	+	chr11	109424672	109424673
chr11	109884422	109884698	L1_Mur3	-	chr11	109884438	109884439
chr11	109955285	109955480	B2_Mm2	-	chr11	109955370	109955371
chr11	110537947	110538154	B3	+	chr11	110537976	110537977
chr11	110610307	110610972	L1MEf	+	chr11	110610899	110610900
chr11	110954575	110954936	ORR1E	-	chr11	110954636	110954637
chr11	113449929	113450258	MTD	-	chr11	113450193	113450194
chr11	113816486	113816740	L1M3	+	chr11	113816580	113816581
chr11	114653556	114653775	ID_B1	+	chr11	114653761	114653762
chr11	115080395	115080583	B2_Mm2	-	chr11	115080468	115080469
chr11	115138977	115139298	MLT1H	+	chr11	115138996	115138997
chr11	116027948	116028058	MIR3	+	chr11	116028009	116028010
chr11	116095628	116095885	EUTREP7	-	chr11	116095651	116095652
chr11	116427710	116427791	L1M2	-	chr11	116427781	116427782
chr11	116666380	116666527	B1_Mur2	+	chr11	116666474	116666475
chr11	117174898	117175205	ORR1E	-	chr11	117174995	117174996
chr11	117847609	117848140	RMER4B	-	chr11	117847652	117847653
chr11	117962262	117962339	L2	+	chr11	117962338	117962339
chr11	117979995	117980159	RSINE1	-	chr11	117980143	117980144
chr11	119266005	119266177	B2_Mm2	+	chr11	119266049	119266050
chr11	120201597	120201739	B1_Mur4	+	chr11	120201669	120201670
chr11	120584047	120584099	ID	+	chr11	120584050	120584051
chr11	121092843	121093022	ID_B1	-	chr11	121093014	121093015
chr11	121340485	121340683	LX3	+	chr11	121340494	121340495
chr11	121680923	121681337	MTD	-	chr11	121681028	121681029
chr11	121966020	121966195	B2_Mm2	-	chr11	121966160	121966161
chr12	3282287	3282481	B2_Mm2	-	chr12	3282479	3282480
chr12	3426051	3426218	B2_Mm2	-	chr12	3426096	3426097
chr12	3745172	3745528	MLT1A-int	-	chr12	3745478	3745479
chr12	3875589	3875785	B2_Mm2	-	chr12	3875694	3875695
chr12	3914393	3914503	L1ME4c	-	chr12	3914461	3914462
chr12	4052701	4052855	ORR1A3	-	chr12	4052770	4052771
chr12	4539506	4539884	MTD	-	chr12	4539629	4539630
chr12	4545376	4545679	MTC	+	chr12	4545536	4545537
chr12	8231189	8231301	L1MCa	+	chr12	8231265	8231266
chr12	8232547	8232699	MER5A	-	chr12	8232691	8232692
chr12	8347443	8347780	MLT1C2	-	chr12	8347659	8347660
chr12	8390839	8391165	RMER6D	+	chr12	8391108	8391109
chr12	8682113	8682477	MTB_Mm	+	chr12	8682150	8682151
chr12	8864776	8865158	MLT1D	+	chr12	8865028	8865029
chr12	8927678	8927959	MTD	-	chr12	8927866	8927867
chr12	11330007	11330390	MTC	+	chr12	11330281	11330282
chr12	12164424	12164820	MTB_Mm	-	chr12	12164522	12164523
chr12	12230198	12230642	MLT1D-int	+	chr12	12230307	12230308
chr12	12390762	12392095	ERVL-E-int	-	chr12	12391068	12391069
chr12	13052305	13052572	L1M1	+	chr12	13052567	13052568
chr12	16004351	16004757	MTE2a	-	chr12	16004452	16004453
chr12	16145833	16145997	MMERVK10C-int	-	chr12	16145861	16145862
chr12	16908373	16908552	B2_Mm2	+	chr12	16908379	16908380
chr12	17350190	17350348	B2_Mm2	+	chr12	17350241	17350242
chr12	17450689	17450835	B3A	+	chr12	17450740	17450741
chr12	17455193	17455478	L2b	-	chr12	17455225	17455226
chr12	17679385	17679841	MTD	+	chr12	17679723	17679724
chr12	21284841	21285031	B2_Mm1t	+	chr12	21284856	21284857
chr12	25284131	25284191	RLTR20B4_MM	-	chr12	25284152	25284153
chr12	25301243	25301386	ID_B1	+	chr12	25301304	25301305
chr12	25316023	25316283	ORR1E	+	chr12	25316237	25316238
chr12	25330344	25330708	MTE2a	-	chr12	25330456	25330457
chr12	25339862	25340052	L4_C_Mam	-	chr12	25339872	25339873
chr12	25378193	25378561	MLT1J	-	chr12	25378360	25378361
chr12	32111712	32112211	MARE6	-	chr12	32111729	32111730
chr12	32305336	32306074	L1MB8	-	chr12	32305813	32305814
chr12	32343517	32344068	MERVL_2A-int	-	chr12	32343693	32343694
chr12	32485484	32485887	BGLII_Mus	+	chr12	32485554	32485555
chr12	32734979	32735704	FordPrefect	+	chr12	32735453	32735454
chr12	32815778	32816843	ORR1F-int	+	chr12	32816109	32816110
chr12	32972703	32972890	B3	-	chr12	32972752	32972753
chr12	32985842	32987637	L1_Rod	+	chr12	32986534	32986535
chr12	33156887	33157066	MIRb	+	chr12	33156924	33156925
chr12	33168371	33169002	L1MB7	-	chr12	33168698	33168699
chr12	33169919	33170201	ORR1F	-	chr12	33169964	33169965
chr12	33171005	33171372	MLT1G3	+	chr12	33171088	33171089
chr12	33332174	33332248	ID4	+	chr12	33332244	33332245
chr12	34666039	34666221	B2_Mm2	+	chr12	34666107	34666108
chr12	34725076	34725380	L2a	-	chr12	34725338	34725339
chr12	34743690	34744562	Charlie1a	+	chr12	34743980	34743981
chr12	35036126	35036488	MTE2b	+	chr12	35036439	35036440
chr12	35288194	35288401	L1M5	-	chr12	35288281	35288282
chr12	35303279	35303502	L1MEd	-	chr12	35303314	35303315
chr12	35676890	35677228	L1ME3A	+	chr12	35677188	35677189
chr12	40018216	40018683	Lx8	-	chr12	40018316	40018317
chr12	40277219	40277999	L1MB7	-	chr12	40277719	40277720
chr12	40504173	40504667	L1M2	+	chr12	40504269	40504270
chr12	40584752	40585041	L1MEc	-	chr12	40584902	40584903
chr12	40600384	40600578	B2_Mm2	+	chr12	40600545	40600546
chr12	44918824	44919157	MLT2B1	+	chr12	44919015	44919016
chr12	51430030	51430139	ORR1B1-int	+	chr12	51430038	51430039
chr12	51673189	51673995	RMER19B	-	chr12	51673262	51673263
chr12	51822358	51822546	B2_Mm2	-	chr12	51822510	51822511
chr12	52319282	52319927	RCHARR1	+	chr12	52319316	52319317
chr12	52327058	52327360	Lx8	-	chr12	52327096	52327097
chr12	52735560	52735749	B2_Mm2	-	chr12	52735724	52735725
chr12	52781477	52782619	Lx9	+	chr12	52782494	52782495
chr12	54133899	54134429	RLTR12D	-	chr12	54134110	54134111
chr12	54444837	54445020	L2c	-	chr12	54444991	54444992
chr12	54640223	54640642	HERVL40-int	-	chr12	54640541	54640542
chr12	54825282	54825493	B3A	+	chr12	54825345	54825346
chr12	69205382	69205567	B2_Mm2	-	chr12	69205517	69205518
chr12	69473109	69473207	RSINE1	+	chr12	69473152	69473153
chr12	69519810	69519959	MIRb	+	chr12	69519863	69519864
chr12	69683539	69683843	MER102b	+	chr12	69683740	69683741
chr12	69750350	69750537	B2_Mm2	-	chr12	69750446	69750447
chr12	69962580	69962791	B3	-	chr12	69962723	69962724
chr12	70140539	70140784	B4A	+	chr12	70140666	70140667
chr12	70155870	70156247	MTD	-	chr12	70156149	70156150
chr12	70929392	70929561	B2_Mm2	+	chr12	70929477	70929478
chr12	71051055	71051270	B3	+	chr12	71051149	71051150
chr12	72489962	72490400	RLTR19	-	chr12	72490286	72490287
chr12	72654905	72655020	B3	+	chr12	72654941	72654942
chr12	73026301	73026517	L2	-	chr12	73026437	73026438
chr12	73723146	73723407	ORR1C2	+	chr12	73723245	73723246
chr12	73742070	73742248	B3A	+	chr12	73742074	73742075
chr12	73876718	73876960	Lx8	-	chr12	73876908	73876909
chr12	73876858	73876977	MER113	+	chr12	73876908	73876909
chr12	75420643	75421882	Lx9	+	chr12	75421561	75421562
chr12	75446250	75446573	L1MC4a	+	chr12	75446495	75446496
chr12	75448958	75449299	MLT1G1	+	chr12	75449100	75449101
chr12	75638208	75639168	Lx7	+	chr12	75638474	75638475
chr12	75688788	75688860	B1F	-	chr12	75688856	75688857
chr12	75726592	75726717	PB1D9	+	chr12	75726653	75726654
chr12	75851184	75851324	B4A	-	chr12	75851319	75851320
chr12	76194729	76194852	B2_Mm2	-	chr12	76194803	76194804
chr12	76318859	76319105	HAL1	+	chr12	76319043	76319044
chr12	76467462	76467730	MER63B	-	chr12	76467525	76467526
chr12	76615173	76615803	ORR1D2-int	+	chr12	76615422	76615423
chr12	76764811	76764976	B3	-	chr12	76764908	76764909
chr12	77085117	77085758	L1M5	+	chr12	77085415	77085416
chr12	78868128	78868440	RLTR35B_MM	-	chr12	78868304	78868305
chr12	78923687	78924091	L1_Rod	+	chr12	78923843	78923844
chr12	79356217	79356411	X6B_LINE	+	chr12	79356378	79356379
chr12	79630179	79630368	L2c	-	chr12	79630323	79630324
chr12	80046701	80046876	MIRc	+	chr12	80046785	80046786
chr12	80668360	80668825	L1MC4	+	chr12	80668552	80668553
chr12	80839060	80839386	ORR1D2	+	chr12	80839187	80839188
chr12	81751285	81751426	ID_B1	-	chr12	81751291	81751292
chr12	81775492	81775994	LTR67B	+	chr12	81775887	81775888
chr12	81819123	81819570	ORR1D1	+	chr12	81819490	81819491
chr12	81832725	81833328	Lx8	+	chr12	81833245	81833246
chr12	82186338	82186589	L1MB8	-	chr12	82186464	82186465
chr12	82244588	82246874	L1M4c	-	chr12	82245426	82245427
chr12	82244588	82246874	L1M4c	-	chr12	82246542	82246543
chr12	83860755	83861113	MTEa	-	chr12	83860835	83860836
chr12	84275045	84275909	RMER19B	-	chr12	84275480	84275481
chr12	84748085	84748404	L2b	-	chr12	84748207	84748208
chr12	85427693	85427823	B1_Mus1	+	chr12	85427818	85427819
chr12	85468700	85468806	MIRc	-	chr12	85468804	85468805
chr12	85523817	85523912	MIR1_Amn	-	chr12	85523906	85523907
chr12	85574826	85574972	MLT1J	+	chr12	85574947	85574948
chr12	87262656	87262972	MTD	+	chr12	87262830	87262831
chr12	87416827	87416961	B2_Mm2	+	chr12	87416881	87416882
chr12	87470291	87470367	MTE2a	-	chr12	87470352	87470353
chr12	88445420	88445748	MLT1L	-	chr12	88445580	88445581
chr12	91161793	91162858	L1M3	-	chr12	91162728	91162729
chr12	91581676	91581871	MIRc	-	chr12	91581846	91581847
chr12	91637433	91638048	L3	-	chr12	91637571	91637572
chr12	91719183	91719538	MTD	-	chr12	91719263	91719264
chr12	91794929	91795363	RMER12	+	chr12	91795138	91795139
chr12	95557381	95557493	B1_Mus1	-	chr12	95557475	95557476
chr12	98283265	98283534	MamGypLTR1b	-	chr12	98283336	98283337
chr12	98290414	98290915	L2c	-	chr12	98290673	98290674
chr12	98850898	98851067	B3	-	chr12	98850990	98850991
chr12	101994895	101995148	Lx8	-	chr12	101994995	101994996
chr12	102282204	102282278	L1ME1	-	chr12	102282269	102282270
chr12	102339268	102339725	MLT1H1	+	chr12	102339337	102339338
chr12	102422623	102422947	L1MB7	-	chr12	102422921	102422922
chr12	102437110	102437296	B4	+	chr12	102437143	102437144
chr12	102748232	102748484	L2a	+	chr12	102748265	102748266
chr12	104062022	104062303	ORR1E	-	chr12	104062112	104062113
chr12	104174832	104175158	L2a	+	chr12	104174965	104174966
chr12	104742467	104742646	B2_Mm2	-	chr12	104742585	104742586
chr12	105027405	105027591	B2_Mm2	-	chr12	105027527	105027528
chr12	108149722	108150207	L1MC4a	+	chr12	108150004	108150005
chr12	108761332	108761384	ID	+	chr12	108761381	108761382
chr12	108761343	108761385	ID4	+	chr12	108761381	108761382
chr12	110956725	110957335	L1MB7	-	chr12	110957009	110957010
chr12	111127790	111127974	B2_Mm2	+	chr12	111127898	111127899
chr12	111470704	111470835	L1MEc	-	chr12	111470708	111470709
chr12	111483918	111484010	B1_Mm	+	chr12	111483959	111483960
chr12	111600989	111601345	RMER15	-	chr12	111601111	111601112
chr12	111643530	111643702	B2_Mm2	+	chr12	111643565	111643566
chr12	111909610	111909762	MIR3	+	chr12	111909615	111909616
chr12	112990972	112991021	L1M4	+	chr12	112990996	112990997
chr12	115011171	115011350	Lx6	-	chr12	115011313	115011314
chr12	115172216	115173509	MLTR25C	-	chr12	115172648	115172649
chr12	115223154	115224448	MLTR25C	-	chr12	115223543	115223544
chr12	117559967	117560166	B3	+	chr12	117560098	117560099
chr12	118296199	118296396	ID_B1	+	chr12	118296321	118296322
chr12	118999241	118999688	MamGypsy2-I	-	chr12	118999458	118999459
chr12	119089345	119089477	MER53	-	chr12	119089459	119089460
chr13	4756224	4757046	L1M4	+	chr13	4756535	4756536
chr13	4971670	4971888	MER121	+	chr13	4971821	4971822
chr13	5443792	5443885	MIRb	-	chr13	5443795	5443796
chr13	5704843	5705153	ORR1C2	+	chr13	5705109	5705110
chr13	5716786	5716979	L2	+	chr13	5716858	5716859
chr13	5756839	5757320	MLT1F2	+	chr13	5757319	5757320
chr13	5778285	5778449	MIR1_Amn	-	chr13	5778397	5778398
chr13	5837341	5837786	MLT1F1	-	chr13	5837443	5837444
chr13	5988590	5988708	MIRb	-	chr13	5988592	5988593
chr13	6062331	6062521	MTE2a	-	chr13	6062356	6062357
chr13	6109321	6109647	MLT1B	+	chr13	6109573	6109574
chr13	6119742	6120088	ORR1D2	+	chr13	6119879	6119880
chr13	6460071	6460689	Lx8b	-	chr13	6460488	6460489
chr13	6897809	6897956	B2_Mm1a	-	chr13	6897866	6897867
chr13	8921752	8922228	RLTR30B_MM	+	chr13	8921815	8921816
chr13	9139484	9139737	L1MCa	+	chr13	9139552	9139553
chr13	10198481	10198653	Lx8b	+	chr13	10198563	10198564
chr13	10251486	10252175	L1MC1	+	chr13	10252068	10252069
chr13	12569520	12569645	ORR1B1-int	+	chr13	12569614	12569615
chr13	12569545	12569674	ID_B1	+	chr13	12569614	12569615
chr13	13536944	13537393	MTC	+	chr13	13537252	13537253
chr13	15850383	15851008	Arthur1B	+	chr13	15850669	15850670
chr13	16918772	16918952	X17_LINE	-	chr13	16918893	16918894
chr13	17755021	17755344	ORR1E	+	chr13	17755182	17755183
chr13	17776049	17776287	Lx8	+	chr13	17776220	17776221
chr13	18016690	18016839	MIRb	-	chr13	18016835	18016836
chr13	18720971	18721581	L1M3	-	chr13	18721525	18721526
chr13	19416172	19416569	MTD	-	chr13	19416224	19416225
chr13	19418268	19418655	BGLII	+	chr13	19418297	19418298
chr13	19806817	19806952	MIR	-	chr13	19806905	19806906
chr13	19812871	19813098	EUTREP7	+	chr13	19813076	19813077
chr13	19827800	19828182	LTR72_RN	+	chr13	19828178	19828179
chr13	19840842	19840958	MIRb	-	chr13	19840882	19840883
chr13	19884714	19885025	B4	+	chr13	19884714	19884715
chr13	20139920	20140210	MER2	-	chr13	20140170	20140171
chr13	20172389	20172789	MTA_Mm	-	chr13	20172496	20172497
chr13	20352312	20352449	Lx10	+	chr13	20352329	20352330
chr13	21445945	21446125	B3	-	chr13	21446012	21446013
chr13	23592659	23593048	ERVB4_3-I_MM	+	chr13	23592891	23592892
chr13	23697446	23697599	B3A	+	chr13	23697556	23697557
chr13	23720220	23722103	ERVB4_1B-I_MM	+	chr13	23720872	23720873
chr13	24338241	24338605	MTEa	-	chr13	24338415	24338416
chr13	24444528	24446016	L1MEf	+	chr13	24445116	24445117
chr13	24524492	24525171	L1MB7	-	chr13	24524886	24524887
chr13	24791481	24791822	Lx8b	-	chr13	24791628	24791629
chr13	25790412	25791027	RMER20B	-	chr13	25790909	25790910
chr13	28491058	28491696	L1_Rod	+	chr13	28491322	28491323
chr13	29734729	29734866	MIRc	-	chr13	29734745	29734746
chr13	30421415	30421875	RLTR30B_MM	+	chr13	30421475	30421476
chr13	30645475	30646874	L1M4c	-	chr13	30645684	30645685
chr13	30786213	30786375	MLT1I	+	chr13	30786292	30786293
chr13	30953440	30954063	L1MCa	-	chr13	30953802	30953803
chr13	32484452	32485125	L1MD2	+	chr13	32484480	32484481
chr13	32839318	32839515	L1MEg	-	chr13	32839450	32839451
chr13	32903051	32903671	MLT-int	-	chr13	32903472	32903473
chr13	32908012	32908925	L1_Mur3	+	chr13	32908447	32908448
chr13	33030538	33031184	MYSERV16_I-int	+	chr13	33030792	33030793
chr13	33073462	33073712	MER57-int	-	chr13	33073536	33073537
chr13	33077506	33077931	MLT-int	+	chr13	33077511	33077512
chr13	33154844	33155324	MT2A	+	chr13	33154936	33154937
chr13	33964089	33964366	L1MD1	-	chr13	33964223	33964224
chr13	33978938	33979279	Lx3C	-	chr13	33979157	33979158
chr13	34007244	34007407	MIRb	-	chr13	34007346	34007347
chr13	35075938	35078728	L1MdV_III	-	chr13	35078072	35078073
chr13	35147401	35148042	L1M2	+	chr13	35147728	35147729
chr13	35181086	35181349	MER99	+	chr13	35181135	35181136
chr13	35208210	35208563	MTEb	+	chr13	35208454	35208455
chr13	35647695	35647711	L1MEi	+	chr13	35647705	35647706
chr13	35949798	35950308	Charlie1a	-	chr13	35949954	35949955
chr13	36074458	36074805	MTD	+	chr13	36074745	36074746
chr13	36696800	36697571	L1MC5a	+	chr13	36696906	36696907
chr13	37140596	37140795	B3	+	chr13	37140783	37140784
chr13	37337469	37337804	ORR1E	-	chr13	37337504	37337505
chr13	37348444	37348534	L1MC4	+	chr13	37348524	37348525
chr13	37348470	37348564	Lx10	-	chr13	37348524	37348525
chr13	37718417	37718744	ORR1B2	+	chr13	37718427	37718428
chr13	38551815	38551862	Lx7	+	chr13	38551854	38551855
chr13	41000138	41000325	B2_Mm2	-	chr13	41000281	41000282
chr13	41127707	41127897	B2_Mm2	-	chr13	41127818	41127819
chr13	41230357	41230773	MLT1H1	+	chr13	41230505	41230506
chr13	41583415	41583942	L1MEb	+	chr13	41583868	41583869
chr13	41725537	41726055	Charlie2a	-	chr13	41725994	41725995
chr13	41883669	41883859	MIR3	-	chr13	41883842	41883843
chr13	42372031	42372857	L2a	-	chr13	42372469	42372470
chr13	43266374	43266679	L1_Rod	+	chr13	43266451	43266452
chr13	43567353	43567669	MLT1J	-	chr13	43567627	43567628
chr13	43804734	43804892	B3	+	chr13	43804766	43804767
chr13	44498497	44498884	MTB	-	chr13	44498515	44498516
chr13	44504512	44504820	RLTR12BD_Mm	+	chr13	44504598	44504599
chr13	44534456	44534728	ORR1F	-	chr13	44534521	44534522
chr13	44601264	44601347	PB1D7	+	chr13	44601314	44601315
chr13	44645994	44646248	ORR1C1	-	chr13	44646070	44646071
chr13	44805020	44805119	B3A	-	chr13	44805023	44805024
chr13	45108946	45109093	L2c	+	chr13	45109076	45109077
chr13	45372759	45372883	L1MC	+	chr13	45372812	45372813
chr13	45459961	45460058	ORR1B2	-	chr13	45459999	45460000
chr13	45786041	45786228	B2_Mm2	-	chr13	45786161	45786162
chr13	45894936	45895137	Tigger14a	+	chr13	45895057	45895058
chr13	46259699	46260538	L1MEc	-	chr13	46259721	46259722
chr13	46497633	46497830	MIR	+	chr13	46497638	46497639
chr13	46696980	46697244	RMER20B	-	chr13	46696990	46696991
chr13	47081043	47081222	B2_Mm2	-	chr13	47081142	47081143
chr13	48548469	48548604	RSINE1	+	chr13	48548516	48548517
chr13	48548477	48548623	B3A	+	chr13	48548516	48548517
chr13	48550233	48550695	RLTR24	+	chr13	48550662	48550663
chr13	49177841	49177937	B3A	+	chr13	49177903	49177904
chr13	49252302	49252830	RMER15	+	chr13	49252362	49252363
chr13	49300597	49300789	ID_B1	+	chr13	49300765	49300766
chr13	50418526	50419021	RLTR30B_MM	-	chr13	50418961	50418962
chr13	51194009	51194209	B3A	-	chr13	51194139	51194140
chr13	51397306	51398362	L1MD1	-	chr13	51397871	51397872
chr13	51733101	51733252	B1_Mus1	-	chr13	51733251	51733252
chr13	51996246	51996577	ORR1F	-	chr13	51996421	51996422
chr13	52036039	52036071	ID4	-	chr13	52036049	52036050
chr13	52100103	52100368	HAL1	+	chr13	52100348	52100349
chr13	52239706	52239998	MTD	+	chr13	52239762	52239763
chr13	52258481	52258813	ORR1E	+	chr13	52258524	52258525
chr13	52827504	52827995	L1M4	-	chr13	52827547	52827548
chr13	52860338	52860614	L1MEc	-	chr13	52860465	52860466
chr13	54160416	54160635	RLTR31C_MM	+	chr13	54160631	54160632
chr13	54209452	54209578	L2c	-	chr13	54209518	54209519
chr13	55249208	55249392	B2_Mm1t	-	chr13	55249316	55249317
chr13	55318591	55318687	PB1D7	-	chr13	55318619	55318620
chr13	55429497	55429603	PB1D10	-	chr13	55429578	55429579
chr13	55432117	55432802	Lx8	-	chr13	55432515	55432516
chr13	55583148	55583621	RLTR12D	-	chr13	55583337	55583338
chr13	55895597	55895933	ORR1E	+	chr13	55895730	55895731
chr13	56151410	56151560	L1MEg	-	chr13	56151546	56151547
chr13	58158708	58158899	B3	-	chr13	58158770	58158771
chr13	58477772	58478172	MTE2a	+	chr13	58478105	58478106
chr13	59379275	59379969	RMER19B2	+	chr13	59379638	59379639
chr13	59643508	59643692	B2_Mm2	+	chr13	59643567	59643568
chr13	60892390	60892801	MTB_Mm	-	chr13	60892450	60892451
chr13	62952467	62952752	L1MC5	+	chr13	62952733	62952734
chr13	63039899	63040106	B3	-	chr13	63039958	63039959
chr13	63040804	63041366	Lx9	-	chr13	63040965	63040966
chr13	63134826	63134957	Tigger19b	-	chr13	63134882	63134883
chr13	63246601	63246741	L1M8	-	chr13	63246696	63246697
chr13	63643493	63643700	MLT1K	+	chr13	63643563	63643564
chr13	63810592	63810776	L1MEd	-	chr13	63810714	63810715
chr13	64260299	64260476	MTC-int	-	chr13	64260433	64260434
chr13	64385062	64385258	B3A	-	chr13	64385183	64385184
chr13	64402117	64402257	MER31B	-	chr13	64402161	64402162
chr13	64413906	64414217	ERVL-B4-int	-	chr13	64413948	64413949
chr13	67377777	67378717	RLTR13B3	+	chr13	67378188	67378189
chr13	69509735	69509881	B2_Mm2	-	chr13	69509813	69509814
chr13	73451466	73451637	B2_Mm2	+	chr13	73451531	73451532
chr13	73471506	73471920	MTB_Mm	+	chr13	73471753	73471754
chr13	74651910	74654268	L1MdV_I	-	chr13	74653709	74653710
chr13	76591588	76592089	RLTR30D2_MM	-	chr13	76592048	76592049
chr13	76615137	76618554	L1Lx_IV	-	chr13	76617805	76617806
chr13	80936076	80936301	Charlie22a	+	chr13	80936152	80936153
chr13	81098961	81099708	Lx7	+	chr13	81099462	81099463
chr13	81136105	81136241	L2d2	+	chr13	81136179	81136180
chr13	83972980	83974032	Lx8b	+	chr13	83973798	83973799
chr13	85596638	85596801	MLT1J	-	chr13	85596785	85596786
chr13	85632636	85636469	Lx5c	-	chr13	85635883	85635884
chr13	90083402	90086977	L1MdV_I	+	chr13	90084943	90084944
chr13	90233450	90234663	RLTR13D3	+	chr13	90234050	90234051
chr13	90984179	90984373	L1MEg	+	chr13	90984300	90984301
chr13	91514905	91515268	L1MC	-	chr13	91515175	91515176
chr13	92221326	92221397	ID4	-	chr13	92221376	92221377
chr13	92241402	92241548	B3	-	chr13	92241546	92241547
chr13	92861446	92861830	MLT1A1	-	chr13	92861579	92861580
chr13	92940894	92941157	MER2	+	chr13	92940915	92940916
chr13	93977204	93977700	MLTR14	+	chr13	93977212	93977213
chr13	94162546	94162598	MIR	-	chr13	94162588	94162589
chr13	94364752	94364881	MIRc	+	chr13	94364850	94364851
chr13	94365789	94365976	Chap1_Mam	-	chr13	94365934	94365935
chr13	94711678	94711796	L4_B_Mam	+	chr13	94711795	94711796
chr13	94972460	94972785	B4	-	chr13	94972767	94972768
chr13	95427486	95427838	ORR1F	+	chr13	95427758	95427759
chr13	95496335	95498060	RLTR14-int	+	chr13	95497764	95497765
chr13	96106448	96106846	MLT1C2	-	chr13	96106655	96106656
chr13	96578582	96579018	RMER6B	-	chr13	96578994	96578995
chr13	97187067	97188099	L1MC4	+	chr13	97187914	97187915
chr13	97344076	97344945	L1MEi	-	chr13	97344187	97344188
chr13	97559713	97560079	L2	-	chr13	97559921	97559922
chr13	97857756	97857977	RMER15	-	chr13	97857970	97857971
chr13	98809173	98809335	B2_Mm2	-	chr13	98809260	98809261
chr13	98812346	98812633	L1MB8	+	chr13	98812376	98812377
chr13	98832371	98832691	L1M7	-	chr13	98832588	98832589
chr13	98874032	98874449	L1_Rod	+	chr13	98874285	98874286
chr13	99998200	99998384	B2_Mm2	+	chr13	99998256	99998257
chr13	100499311	100499492	B2_Mm2	-	chr13	100499446	100499447
chr13	100642475	100642648	B2_Mm2	+	chr13	100642600	100642601
chr13	100659972	100660145	B2_Mm2	+	chr13	100660012	100660013
chr13	100697626	100697720	PB1D10	+	chr13	100697673	100697674
chr13	100853242	100853425	B2_Mm2	-	chr13	100853338	100853339
chr13	101515197	101515591	MTD	-	chr13	101515224	101515225
chr13	101523342	101523661	MamRTE1	-	chr13	101523619	101523620
chr13	101538066	101538438	ORR1E	-	chr13	101538289	101538290
chr13	101547859	101548353	LTR33B	+	chr13	101548034	101548035
chr13	101867012	101867046	MTE2a	+	chr13	101867028	101867029
chr13	102088525	102088651	MIRb	-	chr13	102088558	102088559
chr13	102094222	102094571	MTEa	+	chr13	102094394	102094395
chr13	102688217	102688420	LTR104_Mam	+	chr13	102688290	102688291
chr13	102692665	102692833	ORR1A3-int	-	chr13	102692793	102692794
chr13	102692719	102692905	ID_B1	-	chr13	102692793	102692794
chr13	102745754	102745964	MIR	+	chr13	102745884	102745885
chr13	106998604	106998781	L1M5	-	chr13	106998763	106998764
chr13	107676515	107676688	MER121	-	chr13	107676572	107676573
chr13	107899718	107900100	L2b	+	chr13	107899825	107899826
chr13	108015060	108015465	HAL1	-	chr13	108015459	108015460
chr13	108077425	108077869	L1MC4	-	chr13	108077792	108077793
chr13	108775845	108776175	L2a	+	chr13	108776031	108776032
chr13	109209224	109209864	L3	-	chr13	109209845	109209846
chr13	110431540	110431704	Arthur2	-	chr13	110431658	110431659
chr13	110810404	110810709	L2c	+	chr13	110810413	110810414
chr13	111459946	111460137	ID_B1	+	chr13	111459953	111459954
chr13	111654819	111655434	Lx8	-	chr13	111655427	111655428
chr13	112417222	112417359	Arthur1C	+	chr13	112417228	112417229
chr13	112502005	112502460	L1M5	-	chr13	112502187	112502188
chr13	112786195	112786398	L1_Mur2	-	chr13	112786345	112786346
chr13	113423502	113424095	LTR88a	+	chr13	113423984	113423985
chr13	114889433	114890050	Lx8	-	chr13	114889687	114889688
chr13	116950934	116951758	LTR37-int	+	chr13	116951502	116951503
chr13	117052647	117052991	MLT1L	-	chr13	117052902	117052903
chr13	117223074	117223264	B2_Mm2	-	chr13	117223204	117223205
chr13	120288016	120288323	MT2B1	+	chr13	120288296	120288297
chr14	7852067	7852126	ORR1B1-int	+	chr14	7852099	7852100
chr14	7852080	7852183	PB1D9	+	chr14	7852099	7852100
chr14	7877893	7878367	L1MD1	+	chr14	7878137	7878138
chr14	7958625	7958824	MIR1_Amn	+	chr14	7958711	7958712
chr14	7987465	7987916	RLTR30B_MM	+	chr14	7987473	7987474
chr14	8096231	8096388	B2_Mm2	-	chr14	8096349	8096350
chr14	13911473	13911858	L2a	+	chr14	13911647	13911648
chr14	14587801	14590970	L1MdFanc_II	-	chr14	14590093	14590094
chr14	14607112	14607280	B2_Mm2	-	chr14	14607277	14607278
chr14	14634126	14634328	B3	-	chr14	14634226	14634227
chr14	14868995	14869444	HAL1	-	chr14	14869428	14869429
chr14	14869427	14869506	PB1D11	-	chr14	14869428	14869429
chr14	16182980	16183687	RMER20B	+	chr14	16183177	16183178
chr14	16256257	16256538	ORR1F	+	chr14	16256277	16256278
chr14	17569121	17569534	L1M6	+	chr14	17569435	17569436
chr14	18234005	18234108	MIRb	-	chr14	18234034	18234035
chr14	18506193	18506461	ORR1F	-	chr14	18506253	18506254
chr14	18773633	18774036	L1MC4a	-	chr14	18773806	18773807
chr14	18780157	18780750	L1MD	+	chr14	18780281	18780282
chr14	19729186	19729528	MTD	+	chr14	19729497	19729498
chr14	19985186	19985437	LTR33	+	chr14	19985276	19985277
chr14	19986186	19986335	RLTR22_Mur	+	chr14	19986276	19986277
chr14	20081506	20081605	MTD	+	chr14	20081580	20081581
chr14	20322658	20322815	RSINE1	-	chr14	20322715	20322716
chr14	20422187	20422536	L2a	-	chr14	20422429	20422430
chr14	20766696	20767256	L1MA7	-	chr14	20767124	20767125
chr14	20824696	20825012	L1MB2	-	chr14	20824872	20824873
chr14	20829715	20829900	RLTR20B3A_MM	+	chr14	20829891	20829892
chr14	20894912	20895097	B4	+	chr14	20895090	20895091
chr14	20895035	20895250	MLT1B	+	chr14	20895090	20895091
chr14	21273706	21273856	MIRc	+	chr14	21273795	21273796
chr14	21299866	21300244	HAL1	-	chr14	21300095	21300096
chr14	21745178	21745293	MER91C	-	chr14	21745291	21745292
chr14	21813663	21814156	RLTR28	-	chr14	21813978	21813979
chr14	21841956	21842145	B2_Mm2	-	chr14	21842128	21842129
chr14	21890453	21890652	MIRb	+	chr14	21890640	21890641
chr14	21973324	21973523	MER63A	-	chr14	21973352	21973353
chr14	25464273	25464411	MIRc	-	chr14	25464335	25464336
chr14	26643306	26643777	L1MB7	-	chr14	26643425	26643426
chr14	26698046	26698208	B2_Mm2	-	chr14	26698164	26698165
chr14	26826077	26826390	L2a	-	chr14	26826224	26826225
chr14	27355027	27355375	L1MC4a	+	chr14	27355259	27355260
chr14	30187233	30191039	L1Lx_IV	-	chr14	30190853	30190854
chr14	30192812	30192971	MER58A	-	chr14	30192897	30192898
chr14	30405828	30406348	HAL1	+	chr14	30405989	30405990
chr14	30410049	30410518	Arthur1	+	chr14	30410405	30410406
chr14	30579225	30579586	Lx8b	+	chr14	30579435	30579436
chr14	30593320	30593450	MIR	-	chr14	30593378	30593379
chr14	30674525	30674900	ORR1F	-	chr14	30674592	30674593
chr14	30761288	30761717	L2a	+	chr14	30761482	30761483
chr14	31025881	31026067	B2_Mm2	+	chr14	31025927	31025928
chr14	31062339	31062517	B2_Mm2	+	chr14	31062424	31062425
chr14	31376407	31376566	MIRb	+	chr14	31376453	31376454
chr14	31596638	31596851	ID_B1	+	chr14	31596761	31596762
chr14	31785622	31786015	MLT1L	+	chr14	31785864	31785865
chr14	31930263	31930689	MLT1G1	-	chr14	31930588	31930589
chr14	32159625	32159759	B1_Mus2	-	chr14	32159658	32159659
chr14	32781479	32782081	L1M5	-	chr14	32781645	32781646
chr14	33201683	33202274	Lx5c	-	chr14	33202084	33202085
chr14	36953051	36953779	Lx9	+	chr14	36953312	36953313
chr14	37109305	37109745	RMER10A	+	chr14	37109428	37109429
chr14	37164681	37165058	MER57C2	-	chr14	37165017	37165018
chr14	39387075	39387191	MIR	-	chr14	39387104	39387105
chr14	40949673	40950036	L1MC4	+	chr14	40949882	40949883
chr14	40985588	40985980	L1MCa	-	chr14	40985932	40985933
chr14	45005857	45006232	LTR33	-	chr14	45005990	45005991
chr14	45038068	45038368	L1MB5	+	chr14	45038105	45038106
chr14	47276046	47276261	Lx8	+	chr14	47276183	47276184
chr14	47331634	47332196	RLTR20A3_MM	-	chr14	47332182	47332183
chr14	47359435	47359914	RMER6B	+	chr14	47359755	47359756
chr14	47860517	47860845	L1MA5	-	chr14	47860763	47860764
chr14	49113867	49114702	HAL1	+	chr14	49114487	49114488
chr14	50803255	50803444	B2_Mm2	+	chr14	50803353	50803354
chr14	50865179	50865395	L1ME3F	+	chr14	50865189	50865190
chr14	50991221	50991600	RLTR14	+	chr14	50991378	50991379
chr14	51132375	51132712	ORR1C2	-	chr14	51132440	51132441
chr14	51157004	51158125	Lx5	-	chr14	51157216	51157217
chr14	51163132	51164143	RLTR13D5	-	chr14	51163957	51163958
chr14	51185920	51186126	MLTR25A	+	chr14	51186058	51186059
chr14	51843705	51843912	B3	-	chr14	51843815	51843816
chr14	51926203	51926668	RLTR30B_MM	-	chr14	51926613	51926614
chr14	53751796	53752191	MTD	-	chr14	53751877	53751878
chr14	53753675	53754356	RMER19B2	+	chr14	53753741	53753742
chr14	53763931	53764217	L1ME3Cz	-	chr14	53764161	53764162
chr14	54328636	54328812	B2_Mm2	+	chr14	54328731	54328732
chr14	54770678	54770815	B1_Mur1	+	chr14	54770680	54770681
chr14	56324987	56325111	B1F1	-	chr14	56325099	56325100
chr14	57576605	57577103	ORR1C1-int	+	chr14	57576743	57576744
chr14	57915482	57915669	L1M4	-	chr14	57915510	57915511
chr14	58200885	58201555	L1_Mur3	-	chr14	58201435	58201436
chr14	59185068	59185658	L1M4	+	chr14	59185601	59185602
chr14	59433849	59434253	MTB_Mm	-	chr14	59433999	59434000
chr14	59438513	59438659	B1_Mus1	-	chr14	59438636	59438637
chr14	59534918	59535120	Lx8b	-	chr14	59535003	59535004
chr14	60302411	60302991	Lx9	+	chr14	60302705	60302706
chr14	60432036	60432457	MTD	+	chr14	60432106	60432107
chr14	60466437	60466650	B2_Mm2	+	chr14	60466475	60466476
chr14	60738310	60738907	L1MB2	+	chr14	60738644	60738645
chr14	61360934	61361199	L1MB2	+	chr14	61361067	61361068
chr14	61394372	61394781	L1M5	-	chr14	61394551	61394552
chr14	61518944	61519036	MTEb	-	chr14	61518967	61518968
chr14	61548591	61548948	ORR1F	+	chr14	61548904	61548905
chr14	61554122	61554523	MTD	-	chr14	61554153	61554154
chr14	62074194	62074628	RLTR30E_MM	-	chr14	62074582	62074583
chr14	62808604	62809010	LTR16	+	chr14	62808868	62808869
chr14	63087947	63088170	MER2	+	chr14	63088025	63088026
chr14	64301200	64301260	L2c	+	chr14	64301221	64301222
chr14	64663563	64663700	B1_Mus1	+	chr14	64663680	64663681
chr14	64866673	64866768	PB1D7	-	chr14	64866691	64866692
chr14	64869959	64871233	Lx5c	+	chr14	64870197	64870198
chr14	65093182	65093377	B3	-	chr14	65093267	65093268
chr14	65101219	65101413	MIRb	-	chr14	65101340	65101341
chr14	65113537	65113862	L1MC4	+	chr14	65113581	65113582
chr14	65597815	65597997	B2_Mm2	+	chr14	65597825	65597826
chr14	66166141	66166269	MLT1A	+	chr14	66166260	66166261
chr14	66193885	66194549	MER21C	+	chr14	66194437	66194438
chr14	66541186	66541488	MTEa	-	chr14	66541401	66541402
chr14	66871596	66871711	PB1D11	+	chr14	66871646	66871647
chr14	67100254	67100512	ORR1A3-int	+	chr14	67100308	67100309
chr14	67888052	67888248	MIR3	+	chr14	67888193	67888194
chr14	69728370	69728512	B1_Mur4	-	chr14	69728509	69728510
chr14	69854301	69854459	L2c	+	chr14	69854409	69854410
chr14	70060477	70060613	B4	+	chr14	70060527	70060528
chr14	70096057	70096355	LX3	-	chr14	70096164	70096165
chr14	70402383	70402602	B3A	-	chr14	70402570	70402571
chr14	72707918	72708203	Tigger19a	-	chr14	72708084	72708085
chr14	73329977	73330096	B1F	-	chr14	73330073	73330074
chr14	73330009	73330141	ORR1B1-int	-	chr14	73330073	73330074
chr14	73684712	73685544	Lx9	-	chr14	73685033	73685034
chr14	73838963	73839127	MLT1F	-	chr14	73838967	73838968
chr14	74220443	74220816	MER57E2	+	chr14	74220571	74220572
chr14	74651932	74652183	L1MEj	-	chr14	74652129	74652130
chr14	74847676	74847899	ORR1D2	-	chr14	74847814	74847815
chr14	74949138	74949724	L1_Rod	-	chr14	74949212	74949213
chr14	75008342	75008500	MTB	-	chr14	75008448	75008449
chr14	75516176	75516795	Lx8	-	chr14	75516513	75516514
chr14	76093544	76093733	B2_Mm2	-	chr14	76093562	76093563
chr14	76195269	76195657	LTR16E2	+	chr14	76195536	76195537
chr14	76474306	76474494	B2_Mm2	-	chr14	76474394	76474395
chr14	76480008	76480437	Tigger10	-	chr14	76480026	76480027
chr14	77081374	77081727	Lx8	-	chr14	77081470	77081471
chr14	77511525	77511902	Lx5c	+	chr14	77511726	77511727
chr14	77536181	77536961	L2c	-	chr14	77536492	77536493
chr14	77836810	77837312	L1MEg1	+	chr14	77836983	77836984
chr14	77853664	77854135	LTR37-int	-	chr14	77854035	77854036
chr14	77887045	77887405	MLT1C2	+	chr14	77887094	77887095
chr14	78678058	78678398	HAL1	+	chr14	78678249	78678250
chr14	79441506	79441765	LTR16E1	+	chr14	79441630	79441631
chr14	79469389	79469523	B1_Mm	-	chr14	79469441	79469442
chr14	79469424	79469606	MT2B	-	chr14	79469441	79469442
chr14	79538088	79538170	ID_B1	-	chr14	79538135	79538136
chr14	87125563	87125764	B3A	+	chr14	87125610	87125611
chr14	97028463	97028812	MTD	+	chr14	97028741	97028742
chr14	97760734	97761119	MTB_Mm	-	chr14	97760758	97760759
chr14	98929411	98929701	B4A	+	chr14	98929522	98929523
chr14	99226336	99226467	L4_C_Mam	+	chr14	99226383	99226384
chr14	101559413	101559954	Lx6	+	chr14	101559472	101559473
chr14	102748791	102749192	L2b	-	chr14	102748896	102748897
chr14	102828572	102828758	MIRb	+	chr14	102828681	102828682
chr14	103019866	103020295	RMER2	+	chr14	103020102	103020103
chr14	103037332	103037730	MTE2a	-	chr14	103037404	103037405
chr14	103427761	103427857	MIRc	-	chr14	103427827	103427828
chr14	103945735	103946194	MLT1E2	+	chr14	103945856	103945857
chr14	103978918	103979655	RLTR19-int	-	chr14	103979020	103979021
chr14	104335799	104336961	Lx8b	-	chr14	104336948	104336949
chr14	105164667	105164765	L1M1	-	chr14	105164681	105164682
chr14	105225925	105226121	B2_Mm2	-	chr14	105226012	105226013
chr14	105288533	105288601	ID4	+	chr14	105288553	105288554
chr14	105435441	105435588	MTD	+	chr14	105435472	105435473
chr14	106044272	106045282	ERVL-E-int	+	chr14	106044589	106044590
chr14	116489891	116490152	ORR1F	+	chr14	116489967	116489968
chr14	117690069	117690364	MER33	-	chr14	117690100	117690101
chr14	117761186	117761358	X1_LINE	+	chr14	117761303	117761304
chr14	118709742	118710049	L1M4	+	chr14	118709919	118709920
chr14	119849838	119850668	HAL1ME	-	chr14	119850353	119850354
chr14	120652189	120652357	MER110A	+	chr14	120652286	120652287
chr14	121439492	121439626	B1_Mur4	-	chr14	121439550	121439551
chr14	121439514	121439660	ORR1C2-int	-	chr14	121439550	121439551
chr14	121916708	121916831	B1F2	-	chr14	121916755	121916756
chr14	121928824	121929068	B4A	-	chr14	121928947	121928948
chr15	3270057	3270208	RSINE1	+	chr15	3270070	3270071
chr15	4820123	4821918	Lx4A	+	chr15	4821755	4821756
chr15	5157165	5157275	RSINE1	-	chr15	5157208	5157209
chr15	5302278	5302772	MLT1H1	-	chr15	5302592	5302593
chr15	5432346	5432864	Lx8	+	chr15	5432521	5432522
chr15	5468059	5468288	ORR1F	-	chr15	5468144	5468145
chr15	5576622	5576839	Lx7	+	chr15	5576721	5576722
chr15	5856282	5856770	RMER6B	-	chr15	5856581	5856582
chr15	5950911	5951056	L1M5	+	chr15	5951044	5951045
chr15	6038695	6039242	L2	+	chr15	6039213	6039214
chr15	6341358	6341716	LTR91	+	chr15	6341615	6341616
chr15	6494656	6495763	L4_A_Mam	+	chr15	6495430	6495431
chr15	6524188	6524526	L1M5	-	chr15	6524397	6524398
chr15	6554585	6554802	MTE2a	+	chr15	6554741	6554742
chr15	6622573	6623084	MER68B	-	chr15	6622644	6622645
chr15	7083258	7083468	Lx8	+	chr15	7083356	7083357
chr15	7964629	7965047	RLTR30B_MM	+	chr15	7964641	7964642
chr15	8204129	8206123	L1MdFanc_II	+	chr15	8204800	8204801
chr15	8626870	8627122	LTR81B	+	chr15	8627074	8627075
chr15	8992282	8992475	MIRb	-	chr15	8992377	8992378
chr15	8993854	8994479	Lx7	-	chr15	8993940	8993941
chr15	9629937	9629989	MIR	+	chr15	9629953	9629954
chr15	9954993	9955543	RMER10A	+	chr15	9955185	9955186
chr15	10487401	10487572	B2_Mm2	-	chr15	10487516	10487517
chr15	10767792	10767913	B3	-	chr15	10767819	10767820
chr15	10876425	10876776	MLT1F1	+	chr15	10876494	10876495
chr15	11716179	11716564	ORR1E	-	chr15	11716242	11716243
chr15	25862786	25863754	HAL1	-	chr15	25863054	25863055
chr15	25884344	25884538	L1MC2	+	chr15	25884533	25884534
chr15	25891660	25891784	B1F1	+	chr15	25891712	25891713
chr15	25928913	25929114	B3	+	chr15	25928996	25928997
chr15	27330466	27330740	L3	+	chr15	27330689	27330690
chr15	27663836	27664188	MTD	+	chr15	27664128	27664129
chr15	28027286	28028067	L1MC3	+	chr15	28027577	28027578
chr15	30607933	30608420	MER45B	-	chr15	30608227	30608228
chr15	30610893	30611030	B1_Mm	+	chr15	30610919	30610920
chr15	30616919	30617350	MLT1C2	-	chr15	30616989	30616990
chr15	31466973	31467143	MER34B	+	chr15	31467136	31467137
chr15	33233647	33239018	L1MdMus_I	+	chr15	33234444	33234445
chr15	33359155	33359990	Lx6	-	chr15	33359288	33359289
chr15	34066924	34067343	RLTR23	-	chr15	34067321	34067322
chr15	34356632	34356871	hAT-N1_Mam	-	chr15	34356846	34356847
chr15	34356691	34356903	hAT-N1a_Mam	-	chr15	34356846	34356847
chr15	34775298	34775904	RLTR19-int	-	chr15	34775815	34775816
chr15	34775519	34776097	RodERV21-int	-	chr15	34775815	34775816
chr15	35138643	35140104	RMER17C-int	+	chr15	35140066	35140067
chr15	35724616	35724790	L1MEf	-	chr15	35724663	35724664
chr15	35946480	35946609	ERVB3_1-LTR_MM	-	chr15	35946591	35946592
chr15	36719138	36719458	ORR1F	-	chr15	36719429	36719430
chr15	36782195	36782293	PB1D10	-	chr15	36782257	36782258
chr15	36879863	36879969	L2b	-	chr15	36879913	36879914
chr15	38098118	38098398	MamRTE1	+	chr15	38098243	38098244
chr15	38244789	38245135	MLT1J2	-	chr15	38245084	38245085
chr15	38285411	38285596	B2_Mm2	+	chr15	38285470	38285471
chr15	38527468	38528191	ORR1D-int	-	chr15	38528046	38528047
chr15	38589269	38589398	MER21C	+	chr15	38589394	38589395
chr15	38672495	38672608	PB1D11	+	chr15	38672530	38672531
chr15	41348633	41349843	L1MEj	-	chr15	41349836	41349837
chr15	41576966	41577297	MTC	+	chr15	41577203	41577204
chr15	41765515	41766059	L1MA4	-	chr15	41765638	41765639
chr15	46125632	46125998	RLTR9A4	-	chr15	46125809	46125810
chr15	53288687	53288853	RSINE1	-	chr15	53288852	53288853
chr15	53373952	53374406	Lx7	-	chr15	53373954	53373955
chr15	54071852	54072175	MER97c	+	chr15	54071885	54071886
chr15	55821155	55821356	URR1A	+	chr15	55821183	55821184
chr15	56049020	56049597	MamRep1527	-	chr15	56049363	56049364
chr15	57917000	57917518	L1MC4a	+	chr15	57917351	57917352
chr15	58046293	58046413	PB1D10	+	chr15	58046311	58046312
chr15	58144637	58144739	LTR10_RN	-	chr15	58144646	58144647
chr15	58145863	58145938	PB1D9	-	chr15	58145937	58145938
chr15	58145934	58145999	B2_Mm2	-	chr15	58145937	58145938
chr15	58250106	58250259	MIR3	-	chr15	58250239	58250240
chr15	58261409	58261670	Lx8	-	chr15	58261552	58261553
chr15	58691841	58692136	L2c	-	chr15	58691884	58691885
chr15	58861395	58861513	L1M3	+	chr15	58861408	58861409
chr15	58883099	58883578	RLTR30B_MM	+	chr15	58883215	58883216
chr15	59051104	59051387	L1MA6	+	chr15	59051317	59051318
chr15	59585887	59586256	L2b	-	chr15	59586000	59586001
chr15	59614253	59614554	ORR1E	+	chr15	59614522	59614523
chr15	59681583	59681766	MT2A	+	chr15	59681668	59681669
chr15	59728901	59729039	MIRb	+	chr15	59729008	59729009
chr15	59831149	59831322	MIRc	-	chr15	59831191	59831192
chr15	60626398	60626580	B2_Mm2	+	chr15	60626503	60626504
chr15	61860782	61861258	MLT1L	-	chr15	61860996	61860997
chr15	62401142	62401501	L2b	+	chr15	62401222	62401223
chr15	63150592	63151077	L1M2	-	chr15	63150717	63150718
chr15	64078886	64079789	L1MD3	+	chr15	64079018	64079019
chr15	64082664	64083311	MER21B	+	chr15	64083074	64083075
chr15	64340920	64340984	ID2	-	chr15	64340938	64340939
chr15	64365679	64365993	MLT1J2	+	chr15	64365773	64365774
chr15	66512909	66513028	MIRb	-	chr15	66512935	66512936
chr15	66807176	66807408	Tigger16a	-	chr15	66807338	66807339
chr15	66991774	66991893	LTR33A	-	chr15	66991824	66991825
chr15	66998261	66998578	MLT1A1	-	chr15	66998575	66998576
chr15	67009972	67010144	ID_B1	+	chr15	67010128	67010129
chr15	67030917	67031090	MLT1D	+	chr15	67031062	67031063
chr15	67088301	67088628	LTR33A	-	chr15	67088332	67088333
chr15	67128512	67128641	MIRb	+	chr15	67128581	67128582
chr15	67161587	67161746	MIR1_Amn	-	chr15	67161723	67161724
chr15	67352392	67352483	MTEa	-	chr15	67352452	67352453
chr15	67414363	67414703	MTE2b	+	chr15	67414680	67414681
chr15	67677161	67677418	MTD	+	chr15	67677271	67677272
chr15	67733018	67733339	ORR1D2	+	chr15	67733169	67733170
chr15	67991546	67991770	L2	+	chr15	67991715	67991716
chr15	74528204	74528292	MIRc	+	chr15	74528242	74528243
chr15	74920756	74920819	MTC	-	chr15	74920795	74920796
chr15	74930304	74930698	MurERV4-int	+	chr15	74930537	74930538
chr15	74999032	74999180	RMER15	-	chr15	74999101	74999102
chr15	75003702	75004553	RLTR13B1	+	chr15	75003999	75004000
chr15	75738136	75738437	MLT1J	+	chr15	75738198	75738199
chr15	76218922	76219516	MLT1C2-int	+	chr15	76219068	76219069
chr15	76254060	76254504	L1MEg	+	chr15	76254135	76254136
chr15	76285570	76285748	B2_Mm2	-	chr15	76285645	76285646
chr15	76514459	76514639	MT2B	+	chr15	76514482	76514483
chr15	76770145	76771063	Lx8	+	chr15	76770330	76770331
chr15	76802092	76802310	MT2B2	-	chr15	76802116	76802117
chr15	76829619	76829805	B2_Mm2	+	chr15	76829644	76829645
chr15	76856624	76856796	B2_Mm2	-	chr15	76856712	76856713
chr15	77058496	77058959	RLTR30E_MM	-	chr15	77058886	77058887
chr15	77801475	77801660	B2_Mm2	+	chr15	77801611	77801612
chr15	77837167	77837421	L1ME4b	-	chr15	77837407	77837408
chr15	79139686	79139879	B2_Mm2	+	chr15	79139723	79139724
chr15	79544749	79544855	PB1D9	-	chr15	79544836	79544837
chr15	79910903	79911052	B2_Mm2	+	chr15	79910962	79910963
chr15	80071897	80071967	MIR1_Amn	-	chr15	80071919	80071920
chr15	80127281	80127451	B3	-	chr15	80127361	80127362
chr15	80619962	80620108	AmnSINE1	+	chr15	80620011	80620012
chr15	80813086	80813264	B2_Mm2	+	chr15	80813166	80813167
chr15	81481732	81481880	B1_Mur4	-	chr15	81481760	81481761
chr15	81488087	81488276	B2_Mm2	-	chr15	81488269	81488270
chr15	81533966	81534087	B1_Mur1	-	chr15	81534051	81534052
chr15	81534495	81534823	RMER15	+	chr15	81534708	81534709
chr15	81568047	81568160	RSINE1	-	chr15	81568071	81568072
chr15	81568822	81568926	L2b	+	chr15	81568896	81568897
chr15	81852028	81852153	B1F2	-	chr15	81852145	81852146
chr15	81852046	81852167	MT2B2	-	chr15	81852145	81852146
chr15	83140625	83140685	L2c	+	chr15	83140678	83140679
chr15	83336807	83337007	B2_Mm2	+	chr15	83336871	83336872
chr15	83340656	83340970	ORR1E	+	chr15	83340889	83340890
chr15	83410301	83410398	PB1D7	+	chr15	83410348	83410349
chr15	83561046	83561407	HAL1	+	chr15	83561273	83561274
chr15	84969659	84969851	B3A	+	chr15	84969700	84969701
chr15	85698301	85698707	RLTR31C_MM	-	chr15	85698577	85698578
chr15	86051292	86051477	MER3	-	chr15	86051346	86051347
chr15	87074411	87074521	MIR1_Amn	+	chr15	87074439	87074440
chr15	88745597	88745671	ID4	+	chr15	88745616	88745617
chr15	88760499	88760680	B2_Mm2	-	chr15	88760595	88760596
chr15	88812682	88812890	B3A	+	chr15	88812758	88812759
chr15	90275606	90276073	RLTR30C_MM	-	chr15	90276011	90276012
chr15	96538897	96539327	L1M5	-	chr15	96539096	96539097
chr15	97311866	97312054	URR1B	-	chr15	97312037	97312038
chr15	98083277	98084069	ORR1A1-int	+	chr15	98083935	98083936
chr15	98684783	98684972	B2_Mm2	+	chr15	98684888	98684889
chr15	99026412	99026599	B3	-	chr15	99026429	99026430
chr15	99350592	99350782	B2_Mm2	+	chr15	99350672	99350673
chr15	99351641	99351705	MIR	-	chr15	99351683	99351684
chr15	99381308	99381497	ID_B1	-	chr15	99381313	99381314
chr15	99383746	99383929	B3	-	chr15	99383915	99383916
chr15	99386249	99386424	B2_Mm2	-	chr15	99386353	99386354
chr15	99388225	99388532	ORR1E	-	chr15	99388388	99388389
chr15	99392454	99392561	B1_Mur4	+	chr15	99392557	99392558
chr15	99541856	99542003	MIR	+	chr15	99541976	99541977
chr15	100228766	100228938	B2_Mm2	-	chr15	100228860	100228861
chr15	100230847	100230991	B1_Mur4	+	chr15	100230922	100230923
chr15	100248807	100249105	ORR1A3	+	chr15	100249010	100249011
chr15	100395689	100395875	B2_Mm2	-	chr15	100395815	100395816
chr15	100741734	100742918	MurERV4-int	+	chr15	100742807	100742808
chr15	101108347	101108476	B2_Mm2	+	chr15	101108408	101108409
chr15	101176424	101176531	ERVB4_1B-I_MM	+	chr15	101176467	101176468
chr15	101317760	101318022	MLT1J	-	chr15	101317981	101317982
chr15	102275707	102275878	B3	+	chr15	102275725	102275726
chr15	102277010	102277202	B2_Mm2	+	chr15	102277068	102277069
chr15	103196563	103196710	B2_Mm2	+	chr15	103196626	103196627
chr15	103196568	103196687	MT2B2	+	chr15	103196626	103196627
chr15	103279844	103280011	B2_Mm2	+	chr15	103279895	103279896
chr15	103387137	103387327	B2_Mm2	-	chr15	103387274	103387275
chr15	103393825	103393978	LTR67B	+	chr15	103393887	103393888
chr15	103409109	103409276	B3A	-	chr15	103409162	103409163
chr15	103512221	103512419	MIRc	-	chr15	103512287	103512288
chr15	103549522	103549850	ORR1E	-	chr15	103549839	103549840
chr16	3702836	3703219	RodERV21-int	-	chr16	3703041	3703042
chr16	3714626	3714996	MLT1J	+	chr16	3714787	3714788
chr16	3843310	3843563	L1_Rod	-	chr16	3843436	3843437
chr16	3894766	3894932	ID_B1	+	chr16	3894840	3894841
chr16	3894790	3895002	MT2B2	+	chr16	3894840	3894841
chr16	3895431	3895799	ORR1E	-	chr16	3895557	3895558
chr16	4525558	4525682	RSINE1	-	chr16	4525639	4525640
chr16	4721138	4721330	B2_Mm2	+	chr16	4721189	4721190
chr16	4920593	4920893	ORR1E	-	chr16	4920788	4920789
chr16	5429456	5429650	RMER15	-	chr16	5429561	5429562
chr16	8784895	8785130	ORR1E	-	chr16	8784906	8784907
chr16	8823631	8823939	MLT1J	-	chr16	8823821	8823822
chr16	10165290	10166263	RLTR13C1	-	chr16	10165768	10165769
chr16	10296260	10296366	ID_B1	+	chr16	10296302	10296303
chr16	10330560	10330681	RSINE1	-	chr16	10330659	10330660
chr16	10441387	10441719	L1MB1	+	chr16	10441542	10441543
chr16	10725058	10725444	MLT1J	-	chr16	10725319	10725320
chr16	10770369	10770434	MIR3	+	chr16	10770429	10770430
chr16	10842574	10842680	B1_Mur2	-	chr16	10842655	10842656
chr16	10843518	10843724	ID_B1	-	chr16	10843681	10843682
chr16	10981800	10981974	B3A	-	chr16	10981904	10981905
chr16	11247875	11248027	RSINE1	+	chr16	11247894	11247895
chr16	11442396	11442759	ORR1B1	-	chr16	11442653	11442654
chr16	12032339	12032563	hAT-5_Mam	+	chr16	12032370	12032371
chr16	12142868	12143125	L1M2	-	chr16	12143019	12143020
chr16	12206193	12207650	Lx9	+	chr16	12207145	12207146
chr16	13419737	13420191	RLTR30D2_MM	-	chr16	13420058	13420059
chr16	13673390	13673482	PB1D11	-	chr16	13673470	13673471
chr16	13716984	13717391	MTC	+	chr16	13717029	13717030
chr16	14350557	14350982	Lx8	-	chr16	14350917	14350918
chr16	14462645	14462823	RSINE1	+	chr16	14462708	14462709
chr16	15592317	15592436	B1F	-	chr16	15592379	15592380
chr16	15709860	15710282	RMER16C	-	chr16	15710235	15710236
chr16	15896118	15896303	B3	-	chr16	15896209	15896210
chr16	16092240	16092491	L1Lx_III	+	chr16	16092294	16092295
chr16	16304012	16304174	B2_Mm2	-	chr16	16304118	16304119
chr16	16516360	16516433	PB1D11	-	chr16	16516375	16516376
chr16	16846390	16846562	ORR1B1	-	chr16	16846530	16846531
chr16	16846515	16847078	L1_Rod	-	chr16	16846530	16846531
chr16	17012820	17012941	L3	-	chr16	17012831	17012832
chr16	17421108	17421285	B2_Mm2	+	chr16	17421244	17421245
chr16	17432655	17432825	B2_Mm2	+	chr16	17432737	17432738
chr16	17732123	17732303	B2_Mm2	-	chr16	17732195	17732196
chr16	18789201	18789400	B3	+	chr16	18789263	18789264
chr16	19834098	19835181	MLTR25C	+	chr16	19834297	19834298
chr16	19967011	19967354	ORR1E	-	chr16	19967153	19967154
chr16	20808322	20808488	B2_Mm2	+	chr16	20808407	20808408
chr16	21186379	21186567	B2_Mm2	-	chr16	21186512	21186513
chr16	21814916	21815343	L1M4c	-	chr16	21815098	21815099
chr16	22138585	22138749	X26_DNA	+	chr16	22138711	22138712
chr16	22331133	22331229	MER5A	+	chr16	22331208	22331209
chr16	22444929	22445095	Tigger15a	-	chr16	22445028	22445029
chr16	23088425	23088614	B2_Mm2	-	chr16	23088536	23088537
chr16	23372653	23373473	Lx8	-	chr16	23372728	23372729
chr16	23374669	23375229	RMER19C	-	chr16	23375082	23375083
chr16	23498849	23498913	MIR3	-	chr16	23498850	23498851
chr16	23557177	23557563	L2a	-	chr16	23557325	23557326
chr16	23732239	23732367	ORR1E	-	chr16	23732250	23732251
chr16	23958642	23959060	L1MA6	-	chr16	23958940	23958941
chr16	23977799	23977935	MIRb	+	chr16	23977933	23977934
chr16	24027592	24027780	L4_C_Mam	-	chr16	24027688	24027689
chr16	24099043	24099574	RMER15	+	chr16	24099399	24099400
chr16	24136374	24136497	PB1D7	+	chr16	24136487	24136488
chr16	24185070	24185342	Lx7	+	chr16	24185178	24185179
chr16	24238490	24238591	UCON80	+	chr16	24238523	24238524
chr16	24394103	24394218	MIR1_Amn	-	chr16	24394108	24394109
chr16	25010101	25010497	RMER6B	+	chr16	25010266	25010267
chr16	25024699	25024870	MTD	-	chr16	25024845	25024846
chr16	25026167	25026638	RMER20B	+	chr16	25026362	25026363
chr16	25962408	25962577	L2d	+	chr16	25962474	25962475
chr16	26618716	26619326	L1MD	-	chr16	26619221	26619222
chr16	30213752	30213917	B2_Mm2	+	chr16	30213804	30213805
chr16	31235562	31235758	L2a	-	chr16	31235647	31235648
chr16	32113928	32114442	MTE2b	-	chr16	32114111	32114112
chr16	32176629	32176906	MER46C	-	chr16	32176902	32176903
chr16	32189263	32189399	L3	+	chr16	32189340	32189341
chr16	32917347	32917472	B1_Mur2	+	chr16	32917390	32917391
chr16	32972188	32972548	L1ME2z	+	chr16	32972361	32972362
chr16	33573912	33574067	MIR1_Amn	+	chr16	33573915	33573916
chr16	33641580	33641876	Tigger5b_Glire	-	chr16	33641865	33641866
chr16	33742865	33743042	MIR1_Amn	+	chr16	33742992	33742993
chr16	33894411	33894553	ORR1D2	-	chr16	33894545	33894546
chr16	35056977	35057105	RSINE1	+	chr16	35057037	35057038
chr16	35754766	35755089	MTD	+	chr16	35755003	35755004
chr16	35905267	35905729	MRLTR33	+	chr16	35905618	35905619
chr16	35922172	35923382	MYSERV6-int	-	chr16	35922320	35922321
chr16	36587974	36588605	Lx10	+	chr16	36587976	36587977
chr16	36681666	36682050	MTEa	+	chr16	36681938	36681939
chr16	36707588	36707676	URR1A	-	chr16	36707619	36707620
chr16	36714226	36714438	RLTR28	-	chr16	36714228	36714229
chr16	36884975	36885184	B3	-	chr16	36885093	36885094
chr16	36997601	36998080	L1ME3G	+	chr16	36997814	36997815
chr16	38105550	38105654	MIRb	-	chr16	38105642	38105643
chr16	38110722	38110866	RSINE1	-	chr16	38110811	38110812
chr16	38394962	38395139	ORR1D1	+	chr16	38394989	38394990
chr16	38493511	38493829	ORR1F	-	chr16	38493668	38493669
chr16	38495621	38495711	PB1D10	+	chr16	38495659	38495660
chr16	38899834	38900831	MLTR25A	-	chr16	38900284	38900285
chr16	43209442	43209906	L1MD2	-	chr16	43209707	43209708
chr16	43950075	43950199	MTD	+	chr16	43950164	43950165
chr16	43950902	43952339	L1MCb	-	chr16	43951827	43951828
chr16	44094560	44094709	B3A	+	chr16	44094574	44094575
chr16	45038843	45039044	MLT1J2	+	chr16	45038938	45038939
chr16	45297591	45298114	L1MEi	-	chr16	45297989	45297990
chr16	48973609	48973788	B2_Mm2	+	chr16	48973613	48973614
chr16	49818633	49818989	MTD	-	chr16	49818684	49818685
chr16	49970569	49970805	Tigger19b	-	chr16	49970710	49970711
chr16	50449173	50449331	B3A	+	chr16	50449214	50449215
chr16	50576932	50577373	RLTR20C2_MM	+	chr16	50577164	50577165
chr16	51308166	51308445	MLT1L	-	chr16	51308262	51308263
chr16	51920629	51921424	L1ME1	+	chr16	51921211	51921212
chr16	55396853	55399448	L1Lx_IV	+	chr16	55397469	55397470
chr16	55493127	55493278	B2_Mm2	+	chr16	55493186	55493187
chr16	55635871	55635997	B2_Mm2	-	chr16	55635986	55635987
chr16	55635942	55636058	ERVB7_2-LTR_MM	+	chr16	55635986	55635987
chr16	55747118	55747761	Charlie16	+	chr16	55747342	55747343
chr16	55801820	55802057	L2b	-	chr16	55801824	55801825
chr16	55964668	55964876	B3	-	chr16	55964788	55964789
chr16	57130983	57131264	B4	-	chr16	57131030	57131031
chr16	57216092	57216277	Lx8	+	chr16	57216185	57216186
chr16	57223091	57223267	Charlie11	+	chr16	57223169	57223170
chr16	57246781	57246829	ID_B1	-	chr16	57246812	57246813
chr16	57423019	57423133	PB1D11	+	chr16	57423050	57423051
chr16	59610804	59610964	RMER15	+	chr16	59610864	59610865
chr16	65415860	65417230	Lx7	-	chr16	65416391	65416392
chr16	65548907	65549096	URR1A	+	chr16	65549051	65549052
chr16	76341554	76342336	RMER15-int	-	chr16	76341923	76341924
chr16	76362848	76363163	Lx9	+	chr16	76363141	76363142
chr16	77125312	77125596	LTR50	-	chr16	77125520	77125521
chr16	77125510	77125857	MTB	-	chr16	77125520	77125521
chr16	77269000	77269125	MER121	-	chr16	77269109	77269110
chr16	77275786	77276108	ORR1A2	-	chr16	77275947	77275948
chr16	78476449	78477066	L1_Mur3	-	chr16	78476782	78476783
chr16	84583359	84583751	MamGypsy2-I	+	chr16	84583671	84583672
chr16	84617408	84617905	Lx7	-	chr16	84617642	84617643
chr16	85164226	85164690	Lx8	+	chr16	85164469	85164470
chr16	87585646	87585972	L1M4	-	chr16	87585772	87585773
chr16	87638157	87638553	BGLII_Mur	-	chr16	87638163	87638164
chr16	87655054	87655152	MIR3	+	chr16	87655144	87655145
chr16	87664018	87664168	RLTR11A2	-	chr16	87664096	87664097
chr16	91021158	91021349	L1M5	+	chr16	91021217	91021218
chr16	91413187	91413416	Tigger5b_Glire	-	chr16	91413293	91413294
chr16	91441549	91441760	B3	+	chr16	91441634	91441635
chr16	91523035	91523230	L2	+	chr16	91523111	91523112
chr16	91933084	91933470	MTD	+	chr16	91933350	91933351
chr16	92867287	92867761	MLT1L	-	chr16	92867490	92867491
chr16	92952411	92952602	MER126	-	chr16	92952546	92952547
chr16	93084275	93084334	RSINE1	+	chr16	93084298	93084299
chr16	95009581	95010393	Lx2B2	+	chr16	95009897	95009898
chr16	95929562	95929909	ORR1E	-	chr16	95929721	95929722
chr16	96454107	96454473	MTD	+	chr16	96454425	96454426
chr16	96890231	96890313	L1MdV_III	+	chr16	96890309	96890310
chr16	97172881	97173212	MTE2b	-	chr16	97172923	97172924
chr16	97472458	97473313	L1MB7	-	chr16	97472739	97472740
chr17	3135424	3135645	RMER15	-	chr17	3135544	3135545
chr17	3149534	3149943	MTC	-	chr17	3149658	3149659
chr17	4732594	4732842	UCON44	+	chr17	4732642	4732643
chr17	5316467	5316704	B3	+	chr17	5316648	5316649
chr17	5831489	5831936	RLTR31C_MM	+	chr17	5831560	5831561
chr17	6794373	6794525	MIRb	-	chr17	6794422	6794423
chr17	7896979	7897670	ERVL-E-int	-	chr17	7897080	7897081
chr17	8295920	8296113	B2_Mm2	+	chr17	8295976	8295977
chr17	9002447	9002598	B3A	-	chr17	9002554	9002555
chr17	9774350	9774941	L1MC4	-	chr17	9774886	9774887
chr17	10383586	10383974	MTD	-	chr17	10383671	10383672
chr17	10392398	10392511	RLTR4_Mm	-	chr17	10392495	10392496
chr17	10675002	10675342	ORR1E	-	chr17	10675242	10675243
chr17	10791215	10792041	L1M7	+	chr17	10791271	10791272
chr17	12297643	12297729	PB1D10	-	chr17	12297692	12297693
chr17	12297661	12297757	ID_B1	-	chr17	12297692	12297693
chr17	13659938	13660294	L1MB3	+	chr17	13660065	13660066
chr17	13758694	13758783	ID_B1	-	chr17	13758708	13758709
chr17	17583327	17583653	ORR1E	-	chr17	17583493	17583494
chr17	17601030	17601181	B1F	-	chr17	17601163	17601164
chr17	17871023	17871232	MTD	-	chr17	17871031	17871032
chr17	20946261	20946493	MIR	+	chr17	20946351	20946352
chr17	21370586	21370754	RLTR13E	-	chr17	21370626	21370627
chr17	21468408	21468681	ORR1A3	+	chr17	21468455	21468456
chr17	23654061	23654099	Lx8	-	chr17	23654090	23654091
chr17	23748532	23748688	B2_Mm2	-	chr17	23748561	23748562
chr17	23755190	23755327	B1_Mus1	-	chr17	23755191	23755192
chr17	24428372	24428551	B2_Mm2	+	chr17	24428407	24428408
chr17	24669316	24669460	B1_Mus2	+	chr17	24669459	24669460
chr17	24708757	24708936	B2_Mm2	+	chr17	24708806	24708807
chr17	25131293	25131414	MamTip1	+	chr17	25131305	25131306
chr17	25132086	25133051	RLTR13D3A1	-	chr17	25133045	25133046
chr17	25970582	25970859	L1MB7	+	chr17	25970778	25970779
chr17	26078106	26078279	B2_Mm2	-	chr17	26078220	26078221
chr17	26109460	26109651	B2_Mm2	-	chr17	26109605	26109606
chr17	26460011	26460195	B2_Mm2	+	chr17	26460083	26460084
chr17	26705430	26705539	B2_Mm2	-	chr17	26705491	26705492
chr17	26718029	26718215	B2_Mm2	-	chr17	26718115	26718116
chr17	26975511	26975686	B2_Mm2	+	chr17	26975542	26975543
chr17	27527279	27527526	MLT1G3	+	chr17	27527365	27527366
chr17	27571129	27571207	RLTR20A2	+	chr17	27571164	27571165
chr17	28259871	28259938	ID4	-	chr17	28259897	28259898
chr17	28303960	28304154	B2_Mm2	-	chr17	28304072	28304073
chr17	28462565	28462673	PB1D7	+	chr17	28462630	28462631
chr17	28893457	28894993	MMERVK10C-int	-	chr17	28894546	28894547
chr17	28903545	28903736	B2_Mm2	+	chr17	28903582	28903583
chr17	29000406	29000579	B3A	+	chr17	29000569	29000570
chr17	29076399	29076608	MLT2D	+	chr17	29076427	29076428
chr17	29380329	29381028	Lx8	+	chr17	29380856	29380857
chr17	29386222	29386408	B2_Mm2	+	chr17	29386278	29386279
chr17	29414716	29414864	L1MD3	+	chr17	29414845	29414846
chr17	29435443	29435676	MLT1N2	-	chr17	29435570	29435571
chr17	29443850	29444031	MIRc	+	chr17	29443998	29443999
chr17	29498400	29498553	B2_Mm2	-	chr17	29498401	29498402
chr17	29671001	29671537	MTD-int	+	chr17	29671266	29671267
chr17	30043769	30043977	B2_Mm2	-	chr17	30043792	30043793
chr17	31077007	31077397	MTB	-	chr17	31077098	31077099
chr17	31139434	31139801	MTD	+	chr17	31139695	31139696
chr17	31993155	31993646	RMER15	+	chr17	31993556	31993557
chr17	31994198	31994800	L1MEd	+	chr17	31994317	31994318
chr17	32006817	32007015	MTEa	+	chr17	32006978	32006979
chr17	32411771	32411993	B4A	-	chr17	32411950	32411951
chr17	32609532	32609945	L1Lx_III	+	chr17	32609624	32609625
chr17	32835732	32835885	ORR1D1	-	chr17	32835736	32835737
chr17	33897222	33897390	B2_Mm2	-	chr17	33897336	33897337
chr17	33903100	33903279	B3	+	chr17	33903160	33903161
chr17	33969030	33969208	B2_Mm2	+	chr17	33969084	33969085
chr17	34102935	34104075	L1MC4	-	chr17	34103145	34103146
chr17	34363753	34364438	Lx8	-	chr17	34363808	34363809
chr17	34761447	34762309	ERVB4_1B-I_MM	+	chr17	34761560	34761561
chr17	34783243	34783312	RMER15	-	chr17	34783300	34783301
chr17	34783291	34784138	RMER15-int	-	chr17	34783300	34783301
chr17	34879060	34879246	B2_Mm2	+	chr17	34879150	34879151
chr17	34924327	34924456	ID_B1	+	chr17	34924454	34924455
chr17	34952918	34953069	B2_Mm2	-	chr17	34952994	34952995
chr17	34988683	34989477	MYSERV6-int	-	chr17	34989348	34989349
chr17	35000513	35000742	RLTR4_Mm	-	chr17	35000710	35000711
chr17	35021769	35022178	RLTR18B	-	chr17	35022021	35022022
chr17	35185761	35185930	B2_Mm2	-	chr17	35185826	35185827
chr17	35259181	35259351	ORR1A4	-	chr17	35259290	35259291
chr17	35274255	35274437	B2_Mm1t	+	chr17	35274434	35274435
chr17	35301646	35301829	B2_Mm2	-	chr17	35301782	35301783
chr17	35780471	35780663	L1ME3	+	chr17	35780508	35780509
chr17	36020118	36020260	B3	+	chr17	36020160	36020161
chr17	36088012	36088190	B2_Mm2	-	chr17	36088025	36088026
chr17	36966580	36966979	MTB	+	chr17	36966952	36966953
chr17	37500800	37500944	MMERVK9E_I-int	+	chr17	37500852	37500853
chr17	40789844	40790251	MLT1C2	+	chr17	40790018	40790019
chr17	43421151	43421397	LTR106_Mam	+	chr17	43421249	43421250
chr17	44053462	44053836	MLT1D	-	chr17	44053601	44053602
chr17	44826284	44826792	L1MCa	-	chr17	44826293	44826294
chr17	45114691	45115790	L1M2	-	chr17	45115660	45115661
chr17	45757990	45758222	URR1A	+	chr17	45758198	45758199
chr17	46185450	46185625	B2_Mm2	-	chr17	46185581	46185582
chr17	46393106	46393296	B3	+	chr17	46393200	46393201
chr17	46601627	46601811	B2_Mm2	-	chr17	46601636	46601637
chr17	46746932	46747112	B2_Mm2	-	chr17	46747056	46747057
chr17	47183707	47183905	ID_B1	+	chr17	47183800	47183801
chr17	47214170	47214332	MIR3	-	chr17	47214287	47214288
chr17	47507990	47508149	MTEb	+	chr17	47508140	47508141
chr17	47643123	47643303	B2_Mm2	-	chr17	47643246	47643247
chr17	48185383	48185555	RMER4B	+	chr17	48185470	48185471
chr17	48183628	48185482	RodERV21-int	+	chr17	48185470	48185471
chr17	48292000	48292273	L1M2c	-	chr17	48292249	48292250
chr17	48341836	48342245	L1MC5	+	chr17	48342050	48342051
chr17	48381227	48381512	MT2B2	+	chr17	48381498	48381499
chr17	48381288	48381575	ORR1A4	-	chr17	48381498	48381499
chr17	50119032	50120078	L1_Mur3	+	chr17	50119940	50119941
chr17	50415570	50415924	ORR1E	-	chr17	50415801	50415802
chr17	50491495	50491677	MER105	-	chr17	50491640	50491641
chr17	50504337	50504736	MTD	+	chr17	50504688	50504689
chr17	50525105	50526617	Charlie24	+	chr17	50525337	50525338
chr17	51219990	51220196	MTD	+	chr17	51220123	51220124
chr17	51380879	51381312	BGLII_Mur	-	chr17	51381098	51381099
chr17	51381524	51381698	B2_Mm2	+	chr17	51381531	51381532
chr17	51382523	51383032	L1MC5a	-	chr17	51382873	51382874
chr17	53468629	53468830	MTE2b	-	chr17	53468765	53468766
chr17	53631429	53631819	MTE2a	-	chr17	53631506	53631507
chr17	56265814	56265996	B2_Mm2	-	chr17	56265971	56265972
chr17	56298502	56298687	B2_Mm2	-	chr17	56298613	56298614
chr17	57198303	57198594	RMER15	-	chr17	57198449	57198450
chr17	57245927	57246261	Lx8	+	chr17	57246068	57246069
chr17	57284742	57285126	MLT2B3	-	chr17	57284965	57284966
chr17	57284796	57285128	MTEa	-	chr17	57284965	57284966
chr17	57292375	57292517	B4A	+	chr17	57292408	57292409
chr17	57344387	57344553	LTR16A1	-	chr17	57344478	57344479
chr17	59179049	59179290	HAL1	-	chr17	59179145	59179146
chr17	63371052	63371350	hAT-5_Mam	+	chr17	63371155	63371156
chr17	63402188	63402785	L1MDa	+	chr17	63402407	63402408
chr17	63873565	63873685	MLT1K	-	chr17	63873583	63873584
chr17	63919683	63921195	L1MdV_III	-	chr17	63920594	63920595
chr17	64306617	64306895	Lx8	+	chr17	64306799	64306800
chr17	64471573	64471891	ORR1E	+	chr17	64471642	64471643
chr17	65604375	65604727	MTE2b	+	chr17	65604606	65604607
chr17	65698626	65699056	L1ME3G	+	chr17	65699018	65699019
chr17	65729500	65729676	B2_Mm2	-	chr17	65729653	65729654
chr17	65776094	65776508	BGLII	-	chr17	65776392	65776393
chr17	66355192	66355271	MTD	+	chr17	66355218	66355219
chr17	70703969	70704372	MTB_Mm	-	chr17	70704096	70704097
chr17	70728735	70728848	PB1D9	+	chr17	70728800	70728801
chr17	71178826	71179104	MamGypLTR1b	-	chr17	71179029	71179030
chr17	71485150	71485288	L1MC1	+	chr17	71485208	71485209
chr17	71615868	71615998	L1ME4c	+	chr17	71615904	71615905
chr17	72788089	72788428	LTR50	+	chr17	72788220	72788221
chr17	72818275	72818400	PB1D11	-	chr17	72818308	72818309
chr17	73250510	73250759	ORR1A3	+	chr17	73250649	73250650
chr17	73987807	73988136	L2	-	chr17	73988005	73988006
chr17	74016929	74017325	Lx8	-	chr17	74017257	74017258
chr17	74018157	74018938	Lx8	+	chr17	74018218	74018219
chr17	74245497	74245719	MLT1B	+	chr17	74245585	74245586
chr17	74523703	74523884	B2_Mm2	+	chr17	74523734	74523735
chr17	74527177	74527582	BGLII	-	chr17	74527499	74527500
chr17	74802766	74803026	L1MB2	-	chr17	74802907	74802908
chr17	79174894	79175739	L1MEc	-	chr17	79175572	79175573
chr17	79179543	79180228	RLTR16B_MM	-	chr17	79180088	79180089
chr17	79578905	79579289	L1ME4c	-	chr17	79579112	79579113
chr17	79917002	79917175	L2b	-	chr17	79917160	79917161
chr17	80112741	80113024	ORR1A3-int	-	chr17	80112895	80112896
chr17	80224770	80224941	B2_Mm2	-	chr17	80224839	80224840
chr17	80252604	80252858	L1ME4c	-	chr17	80252835	80252836
chr17	80563848	80564722	MMERVK10D3_I-int	+	chr17	80564660	80564661
chr17	80730720	80731330	L1MA4	+	chr17	80731250	80731251
chr17	80774906	80775513	L1MB1	-	chr17	80775467	80775468
chr17	80826821	80827017	ID_B1	-	chr17	80826833	80826834
chr17	80907759	80907818	B4A	+	chr17	80907781	80907782
chr17	80933136	80933955	L2	+	chr17	80933678	80933679
chr17	81679662	81679985	ORR1D2	-	chr17	81679679	81679680
chr17	83074375	83076442	Charlie8	+	chr17	83075087	83075088
chr17	83680097	83680506	L1_Rod	+	chr17	83680437	83680438
chr17	84089508	84089879	MLT1E2	-	chr17	84089783	84089784
chr17	84108081	84108141	ORR1A3-int	+	chr17	84108109	84108110
chr17	84267567	84268012	L1M3	-	chr17	84267941	84267942
chr17	84329323	84329468	ORR1B1-int	-	chr17	84329443	84329444
chr17	84330423	84330668	ID_B1	+	chr17	84330437	84330438
chr17	84352648	84352973	MLT1H2	+	chr17	84352680	84352681
chr17	85495383	85495662	ORR1F-int	+	chr17	85495589	85495590
chr17	86187736	86188113	ORR1C2	-	chr17	86187951	86187952
chr17	86232273	86232495	MIRb	+	chr17	86232290	86232291
chr17	86376552	86376954	MTEb	-	chr17	86376579	86376580
chr17	86663319	86664647	L1_Mur3	+	chr17	86663769	86663770
chr17	86918888	86919074	B2_Mm2	-	chr17	86919004	86919005
chr17	86977004	86977485	HAL1	-	chr17	86977213	86977214
chr17	86978425	86978793	ORR1A4	-	chr17	86978726	86978727
chr17	87321799	87321971	B2_Mm2	-	chr17	87321896	87321897
chr17	87560937	87561104	B3	-	chr17	87561068	87561069
chr17	88123772	88124053	ORR1E	+	chr17	88123878	88123879
chr17	89099693	89099974	L1MEd	+	chr17	89099739	89099740
chr18	3428241	3428379	B2_Mm2	-	chr18	3428255	3428256
chr18	3481140	3481660	RLTR41C	-	chr18	3481476	3481477
chr18	4279918	4280475	L1Lx_III	+	chr18	4280058	4280059
chr18	4336079	4336230	Tigger19b	-	chr18	4336209	4336210
chr18	4415749	4415904	ORR1B2	-	chr18	4415804	4415805
chr18	4836707	4836947	MTE2a	+	chr18	4836944	4836945
chr18	5876812	5876871	MLT1D	+	chr18	5876818	5876819
chr18	5985815	5985860	MIR	+	chr18	5985851	5985852
chr18	6103160	6104086	L1MDa	+	chr18	6103822	6103823
chr18	6104086	6104707	L1MDa	+	chr18	6104646	6104647
chr18	6151048	6151346	L1MEc	+	chr18	6151075	6151076
chr18	6297265	6297490	ORR1C2	-	chr18	6297323	6297324
chr18	6319768	6320129	MTD	+	chr18	6319782	6319783
chr18	7283867	7284013	RLTR15	+	chr18	7283989	7283990
chr18	7885219	7885726	Lx9	-	chr18	7885474	7885475
chr18	10711945	10712097	B2_Mm2	+	chr18	10711975	10711976
chr18	10869083	10869788	L1MB4	+	chr18	10869525	10869526
chr18	11670704	11670907	B3	-	chr18	11670895	11670896
chr18	11686182	11686369	B4A	+	chr18	11686252	11686253
chr18	11690620	11691495	RLTR13B1	-	chr18	11691105	11691106
chr18	11791829	11792333	RLTR23	+	chr18	11791872	11791873
chr18	12132104	12132169	ORR1F	-	chr18	12132118	12132119
chr18	12659173	12659459	MLT1B	-	chr18	12659398	12659399
chr18	12660645	12660979	Tigger13a	-	chr18	12660735	12660736
chr18	12936652	12937045	RMER6BA	+	chr18	12937028	12937029
chr18	12936911	12937093	RMER6B	-	chr18	12937028	12937029
chr18	20648471	20648663	MTE2a	+	chr18	20648604	20648605
chr18	20761986	20762179	B2_Mm2	+	chr18	20762004	20762005
chr18	20809549	20810371	RLTR40	+	chr18	20809880	20809881
chr18	20826129	20826331	B3	-	chr18	20826268	20826269
chr18	23867544	23868056	MLT1E1A	-	chr18	23867582	23867583
chr18	24074315	24074521	MTE2a	+	chr18	24074467	24074468
chr18	24141731	24142082	Lx6	+	chr18	24142023	24142024
chr18	24588037	24588431	MTB_Mm	-	chr18	24588068	24588069
chr18	24690784	24691389	Charlie2b	-	chr18	24691212	24691213
chr18	24948976	24949406	L1MEc	-	chr18	24949364	24949365
chr18	32405324	32405646	ORR1F	-	chr18	32405454	32405455
chr18	34139922	34140409	L1M3	-	chr18	34140112	34140113
chr18	34354121	34354314	B2_Mm2	-	chr18	34354195	34354196
chr18	34377965	34378338	MLT1E2	-	chr18	34378151	34378152
chr18	34380922	34381427	RMER2	-	chr18	34381218	34381219
chr18	34385411	34385593	B3	+	chr18	34385432	34385433
chr18	34557722	34557905	B2_Mm2	-	chr18	34557754	34557755
chr18	34786479	34786637	B2_Mm2	-	chr18	34786597	34786598
chr18	35709992	35710189	B2_Mm2	-	chr18	35710166	35710167
chr18	35745198	35745309	B1_Mus1	-	chr18	35745227	35745228
chr18	35953094	35953280	B2_Mm2	-	chr18	35953186	35953187
chr18	36239634	36240823	MERVL-int	+	chr18	36239997	36239998
chr18	36628483	36628662	B2_Mm2	+	chr18	36628538	36628539
chr18	36700456	36701012	MER21-int	-	chr18	36700678	36700679
chr18	36708817	36709037	MER21-int	-	chr18	36709007	36709008
[truncated: 2,255 more rows]
