# Supplementary material for: Mouse B2 SINE elements function as IFN-inducible enhancers
Source: eLife. 2023 May 9;12:e82617. doi: 10.7554/eLife.82617 (PMC10229128; doi:10.7554/eLife.82617)
Supplement: Supplementary file 7. [file elife-82617-supp7.xlsx]

## Sheet: Description
Supplemental Table S7
Putative B2_Mm2 enhancers identified using the Activity-by-Contact model or by proximity.
ISG cutoffs: FDR < 0.05, log2FC > 0
Orthology determined by converting human gene IDs using BioMart (Ensembl v105)
Sheets
ISG & B2_Mm2 ABC	Predicted ISG/B2_Mm2-derived enhancer contacts identified using the Activity by Contact Model
B2 near mouse-specific ISGs	Subset of above table with only B2_Mm2 enhancers predicted to regulate mouse-specific ISGs
B2 near mouse-specific ISG GO	Gene ontology analysis results for union murine ISGs (n=393) using gProfiler
ISG & STAT1 B2_Mm2 proximity	Distance from each ISG TSS to the nearest STAT1-bound B2_Mm2 element, according to Piccolo et al. IFNG 2h STAT1 ChIP
Description of columns
Gene ID	Mouse gene ID
Gene name	Mouse gene name
Gene TSS coordinates	Mouse gene transcription start site coordinates
Species specificity	ISG status (mouse-specific, human-specific, shared)
ABC predicted B2_Mm2 enhancer	Coordinates for the top B2_Mm2 element per ISG (by descending ABC score)
ABC score	ABC score for the top B2_Mm2 element per ISG (by descending ABC score)
Nearest STAT1-bound B2_Mm2 element	Coordinates for the nearest STAT1-bound B2_Mm2 element
Distance (kb)	Distance to the nearest STAT1-bound B2_Mm2 element relative to the ISG TSS

## Sheet: ISG & B2_Mm2 ABC
Gene ID	Gene name	Gene TSS coordinates	Species specificity	ABC predicted B2_Mm2 enhancer	ABC score
ENSMUSG00000000078	Klf6	chr13:5861481-5861482	shared	NA	NA
ENSMUSG00000000131	Xpo6	chr7:126200500-126200501	shared	NA	NA
ENSMUSG00000000167	Pih1d2	chr9:50617320-50617321	human	NA	NA
ENSMUSG00000000168	Dlat	chr9:50659779-50659780	human	NA	NA
ENSMUSG00000000184	Ccnd2	chr6:127152192-127152193	mouse	NA	NA
ENSMUSG00000000244	Tspan32	chr7:143005045-143005046	human	NA	NA
ENSMUSG00000000247	Lhx2	chr2:38339280-38339281	mouse	NA	NA
ENSMUSG00000000278	Scpep1	chr11:88955464-88955465	shared	B2_Mm2_chr11:89023926-89024084	0.030995
ENSMUSG00000000318	Clec10a	chr11:70156196-70156197	mouse	NA	NA
ENSMUSG00000000386	Mx1	chr16:97462906-97462907	mouse	NA	NA
ENSMUSG00000000399	Ndufa9	chr6:126849135-126849136	human	NA	NA
ENSMUSG00000000409	Lck	chr4:129573640-129573641	mouse	NA	NA
ENSMUSG00000000489	Pdgfb	chr15:80014976-80014977	shared	NA	NA
ENSMUSG00000000531	Grasp	chr15:101224187-101224188	human	B2_Mm2_chr15:101243884-101244069	0.018139
ENSMUSG00000000532	Acvr1b	chr15:101174066-101174067	human	NA	NA
ENSMUSG00000000544	Gpa33	chr1:166130237-166130238	human	NA	NA
ENSMUSG00000025898	Cwf19l2	chr9:3403591-3403592	mouse	B2_Mm2_chr9:3403481-3403663	0.803377
ENSMUSG00000000562	Adora3	chr3:105870857-105870858	mouse	NA	NA
ENSMUSG00000000563	Atp5f1	chr3:105960098-105960099	mouse	NA	NA
ENSMUSG00000000581	C1d	chr11:17257578-17257579	mouse	NA	NA
ENSMUSG00000000594	Gm2a	chr11:55098114-55098115	human	NA	NA
ENSMUSG00000000605	Clcn4	chr7:7300850-7300851	human	NA	NA
ENSMUSG00000000628	Hk2	chr6:82774453-82774454	shared	NA	NA
ENSMUSG00000000673	Haao	chr17:83846789-83846790	human	NA	NA
ENSMUSG00000000682	Cd52	chr4:134095081-134095082	mouse	NA	NA
ENSMUSG00000000708	Kat2b	chr17:53566860-53566861	shared	NA	NA
ENSMUSG00000000732	Icosl	chr10:78069301-78069302	mouse	NA	NA
ENSMUSG00000019802	Sec63	chr10:42761495-42761496	mouse	B2_Mm2_chr10:42760233-42760346	0.368623
ENSMUSG00000000776	Polr3d	chr14:70443446-70443447	human	NA	NA
ENSMUSG00000066148	Prpf4	chr4:62408796-62408797	mouse	B2_Mm2_chr4:62407240-62407421	0.35125
ENSMUSG00000026526	Fh1	chr1:175625634-175625635	mouse	B2_Mm2_chr1:175626089-175626272	0.27937
ENSMUSG00000000915	Hip1r	chr5:123973627-123973628	mouse	NA	NA
ENSMUSG00000000934	Top1mt	chr15:75678799-75678800	human	NA	NA
ENSMUSG00000000958	Slc7a7	chr14:54417779-54417780	human	B2_Mm2_chr14:54423485-54423657	0.018472
ENSMUSG00000001014	Icam4	chr9:21029372-21029373	mouse	NA	NA
ENSMUSG00000001052	Sec24b	chr3:130061552-130061553	mouse	NA	NA
ENSMUSG00000001053	N4bp3	chr11:51650841-51650842	human	NA	NA
ENSMUSG00000001062	Vps9d1	chr8:123254347-123254348	human	NA	NA
ENSMUSG00000001065	Zfp276	chr8:123254194-123254195	human	NA	NA
ENSMUSG00000001089	Luzp1	chr4:136469760-136469761	mouse	NA	NA
ENSMUSG00000001098	Kctd10	chr5:114380507-114380508	mouse	NA	NA
ENSMUSG00000056692	RP24-535N4.2	chr17:27820557-27820558	mouse	B2_Mm2_chr17:27826636-27826802	0.225365
ENSMUSG00000001211	Agpat3	chr10:78352488-78352489	human	NA	NA
ENSMUSG00000001229	Dpp9	chr17:56218888-56218889	mouse	NA	NA
ENSMUSG00000001281	Itgb7	chr15:102231943-102231944	human	NA	NA
ENSMUSG00000001305	Rrp15	chr1:186749357-186749358	human	NA	NA
ENSMUSG00000001348	Acp5	chr9:22135710-22135711	human	NA	NA
ENSMUSG00000001415	Smg5	chr3:88336259-88336260	mouse	NA	NA
ENSMUSG00000001424	Snd1	chr6:28475138-28475139	mouse	NA	NA
ENSMUSG00000001440	Kpnb1	chr11:97187880-97187881	human	NA	NA
ENSMUSG00000001444	Tbx21	chr11:97115330-97115331	shared	NA	NA
ENSMUSG00000001473	Tubb6	chr18:67390716-67390717	mouse	NA	NA
ENSMUSG00000001521	Tulp3	chr6:128355850-128355851	mouse	NA	NA
ENSMUSG00000001588	Acap1	chr11:69895538-69895539	human	B2_Mm2_chr11:69663102-69663225	0.01148
ENSMUSG00000001627	Ifrd1	chr12:40248503-40248504	mouse	NA	NA
ENSMUSG00000001630	Stk38l	chr6:146724994-146724995	mouse	NA	NA
ENSMUSG00000001632	Brpf1	chr6:113307136-113307137	mouse	NA	NA
ENSMUSG00000001687	Ubl3	chr5:148552788-148552789	mouse	NA	NA
ENSMUSG00000001761	Smo	chr6:29735502-29735503	human	NA	NA
ENSMUSG00000001783	Rtcb	chr10:85957822-85957823	mouse	NA	NA
ENSMUSG00000001786	Fbxo7	chr10:86021971-86021972	mouse	NA	NA
ENSMUSG00000001911	Nfix	chr8:84800343-84800344	human	NA	NA
ENSMUSG00000001918	Slc1a5	chr7:16781339-16781340	human	NA	NA
ENSMUSG00000001924	Uba1	chrX:20658325-20658326	mouse	NA	NA
ENSMUSG00000029413	Naaa	chr5:92278169-92278170	mouse	B2_Mm2_chr5:92279606-92279780	0.213282
ENSMUSG00000002100	Mybpc3	chr2:91118143-91118144	shared	NA	NA
ENSMUSG00000002102	Psmc3	chr2:91054008-91054009	human	B2_Mm2_chr2:91033137-91033302	0.021512
ENSMUSG00000002103	Acp2	chr2:91202884-91202885	human	NA	NA
ENSMUSG00000002108	Nr1h3	chr2:91202833-91202834	human	NA	NA
ENSMUSG00000002109	Ddb2	chr2:91236981-91236982	human	NA	NA
ENSMUSG00000002111	Spi1	chr2:91082389-91082390	mouse	NA	NA
ENSMUSG00000002129	Sf3a1	chr11:4160349-4160350	mouse	NA	NA
ENSMUSG00000002210	Smg9	chr7:24399618-24399619	human	NA	NA
ENSMUSG00000002227	Mov10	chr3:104818562-104818563	shared	NA	NA
ENSMUSG00000002233	Rhoc	chr3:104788374-104788375	mouse	NA	NA
ENSMUSG00000002297	Dbf4	chr5:8422715-8422716	human	NA	NA
ENSMUSG00000002307	Daxx	chr17:33909413-33909414	mouse	NA	NA
ENSMUSG00000002325	Irf9	chr14:55603570-55603571	human	NA	NA
ENSMUSG00000002489	Tiam1	chr16:90143768-90143769	mouse	NA	NA
ENSMUSG00000002524	Puf60	chr15:76080923-76080924	mouse	NA	NA
ENSMUSG00000002565	Scin	chr12:40134227-40134228	human	NA	NA
ENSMUSG00000002578	Ikzf4	chr10:128645990-128645991	mouse	NA	NA
ENSMUSG00000002602	Axl	chr7:25788704-25788705	shared	NA	NA
ENSMUSG00000090877	Hspa1b	chr17:34959237-34959238	mouse	B2_Mm2_chr17:34952918-34953069	0.201572
ENSMUSG00000002699	Lcp2	chr11:34046919-34046920	shared	NA	NA
ENSMUSG00000002797	Ggct	chr6:54992949-54992950	mouse	NA	NA
ENSMUSG00000002812	Flii	chr11:60727262-60727263	mouse	NA	NA
ENSMUSG00000002814	Top3a	chr11:60777364-60777365	mouse	NA	NA
ENSMUSG00000002820	Atg4d	chr9:21265292-21265293	mouse	NA	NA
ENSMUSG00000002844	Adprh	chr16:38452702-38452703	human	NA	NA
ENSMUSG00000002845	Tmem39a	chr16:38558697-38558698	mouse	NA	NA
ENSMUSG00000021036	Sptlc2	chr12:87388354-87388355	mouse	B2_Mm2_chr12:87406808-87406992	0.197376
ENSMUSG00000002885	Adgre5	chr8:83741325-83741326	human	NA	NA
ENSMUSG00000002897	Il17ra	chr6:120463246-120463247	human	NA	NA
ENSMUSG00000002908	Kcnn1	chr8:70863257-70863258	human	NA	NA
ENSMUSG00000002983	Relb	chr7:19629437-19629438	shared	NA	NA
ENSMUSG00000002984	Tomm40	chr7:19715437-19715438	human	NA	NA
ENSMUSG00000002997	Prkar2b	chr12:32061295-32061296	human	NA	NA
ENSMUSG00000003032	Klf4	chr4:55532465-55532466	shared	NA	NA
ENSMUSG00000003037	Rab8a	chr8:72161199-72161200	human	NA	NA
ENSMUSG00000003062	Stard3nl	chr13:19395794-19395795	mouse	NA	NA
ENSMUSG00000003070	Efna2	chr10:80179481-80179482	mouse	NA	NA
ENSMUSG00000003119	Cdk12	chr11:98203058-98203059	mouse	NA	NA
ENSMUSG00000003123	Lipe	chr7:25398709-25398710	mouse	NA	NA
ENSMUSG00000003131	Pafah1b2	chr9:46012689-46012690	mouse	NA	NA
ENSMUSG00000003161	Sri	chr5:8046077-8046078	human	NA	NA
ENSMUSG00000003206	Ebi3	chr17:55952622-55952623	human	NA	NA
ENSMUSG00000003226	Ranbp2	chr10:58446919-58446920	mouse	NA	NA
ENSMUSG00000003235	Eif2b5	chr16:20498816-20498817	mouse	NA	NA
ENSMUSG00000003273	Car11	chr7:45699842-45699843	human	NA	NA
ENSMUSG00000003283	Hck	chr2:153108467-153108468	mouse	NA	NA
ENSMUSG00000003437	Paf1	chr7:28392950-28392951	mouse	NA	NA
ENSMUSG00000003444	Med29	chr7:28392707-28392708	mouse	NA	NA
ENSMUSG00000003617	Cp	chr3:19957053-19957054	human	B2_Mm2_chr3:20076795-20076959	0.013106
ENSMUSG00000003808	Farsa	chr8:84856988-84856989	mouse	NA	NA
ENSMUSG00000003812	Dnase2a	chr8:84908559-84908560	human	NA	NA
ENSMUSG00000003814	Calr	chr8:84846933-84846934	mouse	NA	NA
ENSMUSG00000003873	Bax	chr7:45466897-45466898	human	NA	NA
ENSMUSG00000003992	Ssbp2	chr13:91460282-91460283	mouse	NA	NA
ENSMUSG00000004018	Fancl	chr11:26386134-26386135	human	B2_Mm2_chr11:26602183-26602339	0.04017
ENSMUSG00000004040	Stat3	chr11:100939539-100939540	shared	NA	NA
ENSMUSG00000020577	Tspan13	chr12:36042499-36042500	mouse	B2_Mm2_chr12:36037000-36037062	0.194528
ENSMUSG00000004096	Cwc15	chr9:14500616-14500617	mouse	NA	NA
ENSMUSG00000004113	Cacna1b	chr2:24763151-24763152	mouse	NA	NA
ENSMUSG00000004266	Ptpn6	chr6:124738713-124738714	shared	NA	NA
ENSMUSG00000004285	Atp6v1f	chr6:29467717-29467718	human	NA	NA
ENSMUSG00000018930	Ccl4	chr11:83662583-83662584	mouse	B2_Mm2_chr11:83663111-83663292	0.190787
ENSMUSG00000004446	Bid	chr6:120916852-120916853	mouse	NA	NA
ENSMUSG00000004451	Ralb	chr1:119504793-119504794	human	NA	NA
ENSMUSG00000004460	Dnajb11	chr16:22857844-22857845	mouse	NA	NA
ENSMUSG00000004535	Tax1bp1	chr6:52713728-52713729	human	NA	NA
ENSMUSG00000004552	Ctse	chr1:131638305-131638306	mouse	NA	NA
ENSMUSG00000004591	Pkn2	chr3:142882003-142882004	mouse	NA	NA
ENSMUSG00000004633	Chn2	chr6:54039553-54039554	mouse	NA	NA
ENSMUSG00000004661	Arid3b	chr9:57836792-57836793	human	NA	NA
ENSMUSG00000004748	Mtfp1	chr11:4095444-4095445	human	NA	NA
ENSMUSG00000004843	Chmp2b	chr16:65562725-65562726	shared	NA	NA
ENSMUSG00000004846	Plod3	chr5:136987018-136987019	mouse	NA	NA
ENSMUSG00000004864	Mapk13	chr17:28769306-28769307	mouse	NA	NA
ENSMUSG00000036931	Nfkbid	chr7:30421731-30421732	mouse	B2_Mm2_chr7:30412448-30412636	0.182661
ENSMUSG00000004952	Rasa4	chr5:136083915-136083916	mouse	NA	NA
ENSMUSG00000005054	Cstb	chr10:78425668-78425669	human	B2_Mm2_chr10:78420062-78420236	0.016667
ENSMUSG00000005057	Sh2b2	chr5:136246555-136246556	human	NA	NA
ENSMUSG00000005089	Slc1a2	chr2:102658658-102658659	human	NA	NA
ENSMUSG00000005103	Wdr1	chr5:38563220-38563221	mouse	NA	NA
ENSMUSG00000005107	Slc2a9	chr5:38503142-38503143	human	NA	NA
ENSMUSG00000005125	Ndrg1	chr15:66969639-66969640	mouse	NA	NA
ENSMUSG00000005148	Klf5	chr14:99298690-99298691	human	NA	NA
ENSMUSG00000005267	Zfp287	chr11:62731904-62731905	mouse	NA	NA
ENSMUSG00000024217	Snrpc	chr17:27839973-27839974	mouse	B2_Mm2_chr17:27826636-27826802	0.17534
ENSMUSG00000005312	Ubqln1	chr13:58215652-58215653	shared	NA	NA
ENSMUSG00000005360	Slc1a3	chr15:8710763-8710764	human	NA	NA
ENSMUSG00000005362	Crbn	chr6:106800076-106800077	mouse	NA	NA
ENSMUSG00000005447	Pafah1b3	chr7:25297985-25297986	human	NA	NA
ENSMUSG00000005483	Dnajb1	chr8:83608192-83608193	mouse	NA	NA
ENSMUSG00000005510	Ndufs3	chr2:90904826-90904827	mouse	NA	NA
ENSMUSG00000005540	Fcer2a	chr8:3694174-3694175	human	NA	NA
ENSMUSG00000005615	Pcyt1a	chr16:32430920-32430921	human	NA	NA
ENSMUSG00000005656	Snx6	chr12:54795702-54795703	mouse	NA	NA
ENSMUSG00000005667	Mthfd2	chr6:83325907-83325908	human	NA	NA
ENSMUSG00000005774	Rfx5	chr3:94954074-94954075	shared	NA	NA
ENSMUSG00000005779	Psmb4	chr3:94886960-94886961	shared	NA	NA
ENSMUSG00000005802	Slc30a4	chr2:122702662-122702663	shared	NA	NA
ENSMUSG00000005804	Bloc1s6	chr2:122738502-122738503	shared	NA	NA
ENSMUSG00000005823	Gpr108	chr17:57247640-57247641	mouse	NA	NA
ENSMUSG00000005824	Tnfsf14	chr17:57194188-57194189	mouse	NA	NA
ENSMUSG00000005968	Tuft1	chr3:94658871-94658872	human	NA	NA
ENSMUSG00000005973	Rcn1	chr2:105399318-105399319	shared	NA	NA
ENSMUSG00000006005	Tpr	chr1:150392837-150392838	mouse	NA	NA
ENSMUSG00000006014	Prg4	chr1:150466164-150466165	mouse	NA	NA
ENSMUSG00000006024	Napa	chr7:16098457-16098458	human	B2_Mm2_chr7:16257354-16257541	0.029734
ENSMUSG00000061589	Dot1l	chr10:80755205-80755206	mouse	B2_Mm2_chr10:80751200-80751354	0.166134
ENSMUSG00000025626	Phf6	chrX:52912265-52912266	mouse	B2_Mm2_chrX:52928972-52929150	0.142646
ENSMUSG00000006154	Eps8l1	chr7:4460673-4460674	human	B2_Mm2_chr7:4409860-4409955	0.016198
ENSMUSG00000097558	Gm26902	chr19:34474807-34474808	mouse	B2_Mm2_chr19:34471720-34471895	0.141337
ENSMUSG00000006205	Htra1	chr7:130936110-130936111	mouse	NA	NA
ENSMUSG00000006215	Zbtb17	chr4:141444653-141444654	mouse	NA	NA
ENSMUSG00000006262	Mob1b	chr5:88720854-88720855	mouse	NA	NA
ENSMUSG00000006273	Atp6v1b2	chr8:69088645-69088646	human	NA	NA
ENSMUSG00000006299	Aamp	chr1:74284737-74284738	human	B2_Mm2_chr1:74307457-74307587	0.010384
ENSMUSG00000006301	Tmbim1	chr1:74305621-74305622	human	B2_Mm2_chr1:74307457-74307587	0.067918
ENSMUSG00000006304	Arpc2	chr1:74236083-74236084	mouse	NA	NA
ENSMUSG00000006344	Ggt5	chr10:75589339-75589340	human	NA	NA
ENSMUSG00000006411	Pvrl4	chr1:171370098-171370099	mouse	NA	NA
ENSMUSG00000006412	Pfdn2	chr1:171345669-171345670	human	NA	NA
ENSMUSG00000006418	Rnf114	chr2:167492644-167492645	shared	NA	NA
ENSMUSG00000006423	RP23-286I5.3	chrX:36874110-36874111	human	NA	NA
ENSMUSG00000006599	Gtf2h1	chr7:46796102-46796103	human	NA	NA
ENSMUSG00000006728	Cdk4	chr10:127063533-127063534	human	NA	NA
ENSMUSG00000006732	Mettl1	chr10:127041413-127041414	human	B2_Mm2_chr10:126988024-126988144	0.011668
ENSMUSG00000006777	Krt23	chr11:99493136-99493137	human	B2_Mm2_chr11:100702548-100702730	0.011763
ENSMUSG00000020707	Rnf135	chr11:80183850-80183851	mouse	B2_Mm2_chr11:80183497-80183583	0.134964
ENSMUSG00000006800	Sulf2	chr2:166155662-166155663	human	NA	NA
ENSMUSG00000006818	Sod2	chr17:13007838-13007839	shared	NA	NA
ENSMUSG00000006930	Hap1	chr11:100356127-100356128	mouse	NA	NA
ENSMUSG00000006941	Eif1b	chr9:120492231-120492232	human	NA	NA
ENSMUSG00000007021	Syngr3	chr17:24689954-24689955	human	B2_Mm2_chr17:24708575-24708747	0.017507
ENSMUSG00000029798	Herc6	chr6:57580999-57581000	mouse	B2_Mm2_chr6:57581896-57581921	0.132386
ENSMUSG00000041415	Dicer1	chr12:104751951-104751952	mouse	B2_Mm2_chr12:104742467-104742646	0.127508
ENSMUSG00000007279	Scube2	chr7:109865678-109865679	human	NA	NA
ENSMUSG00000007338	Mrpl49	chr19:6057750-6057751	human	NA	NA
ENSMUSG00000007411	Mark3	chr12:111574522-111574523	mouse	NA	NA
ENSMUSG00000007458	M6pr	chr6:122308719-122308720	mouse	NA	NA
ENSMUSG00000007564	Ppp2r1a	chr17:20945310-20945311	mouse	NA	NA
ENSMUSG00000007589	Tinf2	chr14:55681819-55681820	human	NA	NA
ENSMUSG00000007617	Homer1	chr13:93299634-93299635	shared	NA	NA
ENSMUSG00000007659	Bcl2l1	chr2:152831727-152831728	shared	B2_Mm2_chr2:152802115-152802152	0.01051
ENSMUSG00000007721	Ccdc124	chr8:70873934-70873935	mouse	NA	NA
ENSMUSG00000008036	Ap2s1	chr7:16738409-16738410	mouse	NA	NA
ENSMUSG00000008153	Clstn3	chr6:124464793-124464794	human	NA	NA
ENSMUSG00000086784	Isoc2a	chr7:4877152-4877153	mouse	B2_Mm2_chr7:4865130-4865296	0.124563
ENSMUSG00000008318	Relt	chr7:100863445-100863446	mouse	NA	NA
ENSMUSG00000008348	Ubc	chr5:125390201-125390202	human	NA	NA
ENSMUSG00000008373	Prpf31	chr7:3629984-3629985	mouse	NA	NA
ENSMUSG00000008384	Sertad1	chr7:27486909-27486910	shared	B2_Mm2_chr7:27590903-27591068	0.01101
ENSMUSG00000008475	Arpc5	chr1:152766541-152766542	mouse	NA	NA
ENSMUSG00000008690	Ncaph2	chr15:89355718-89355719	human	B2_Mm2_chr15:89430491-89430679	0.011137
ENSMUSG00000008730	Hipk1	chr3:103791562-103791563	mouse	NA	NA
ENSMUSG00000009035	Tmem184b	chr15:79403568-79403569	mouse	NA	NA
ENSMUSG00000009112	Bcl2l13	chr6:120836211-120836212	human	NA	NA
ENSMUSG00000009185	Ccl8	chr11:82115184-82115185	mouse	NA	NA
ENSMUSG00000009248	Ascl2	chr7:142969263-142969264	human	NA	NA
ENSMUSG00000009292	Trpm2	chr10:77970562-77970563	human	NA	NA
ENSMUSG00000009293	Ube2g2	chr10:77622274-77622275	mouse	NA	NA
ENSMUSG00000009350	Mpo	chr11:87793580-87793581	human	NA	NA
ENSMUSG00000009376	Met	chr6:17463799-17463800	mouse	NA	NA
ENSMUSG00000009585	Apobec3	chr15:79891658-79891659	mouse	NA	NA
ENSMUSG00000009772	Nuak2	chr1:132316125-132316126	mouse	NA	NA
ENSMUSG00000009863	Sdhb	chr4:140961202-140961203	human	NA	NA
ENSMUSG00000009905	Kdsr	chr1:106759726-106759727	human	NA	NA
ENSMUSG00000010021	Kif19a	chr11:114765387-114765388	mouse	NA	NA
ENSMUSG00000010097	Nxf1	chr19:8757072-8757073	shared	NA	NA
ENSMUSG00000010142	Tnfrsf13b	chr11:61126754-61126755	mouse	NA	NA
ENSMUSG00000106209	RP23-50I16.2	chr5:121385521-121385522	mouse	B2_Mm2_chr5:121389850-121390039	0.121061
ENSMUSG00000010277	RP23-185A18.9	chr11:78261751-78261752	mouse	NA	NA
ENSMUSG00000010342	Tex14	chr11:87405064-87405065	shared	NA	NA
ENSMUSG00000010358	Ifi35	chr11:101448406-101448407	shared	NA	NA
ENSMUSG00000010392	Gosr1	chr11:76763578-76763579	mouse	NA	NA
ENSMUSG00000010760	Phlda2	chr7:143503149-143503150	human	NA	NA
ENSMUSG00000010936	Vac14	chr8:110618584-110618585	human	NA	NA
ENSMUSG00000011008	Mcoln2	chr3:146149832-146149833	human	NA	NA
ENSMUSG00000011096	Akt1s1	chr7:44848990-44848991	human	NA	NA
ENSMUSG00000011179	Odc1	chr12:17544793-17544794	mouse	NA	NA
ENSMUSG00000011884	Gltp	chr5:114690983-114690984	human	NA	NA
ENSMUSG00000012296	Tjap1	chr17:46283025-46283026	mouse	NA	NA
ENSMUSG00000012350	Ehf	chr2:103303277-103303278	human	NA	NA
ENSMUSG00000012422	Tmem167	chr13:90089122-90089123	mouse	NA	NA
ENSMUSG00000012428	Steap4	chr5:7960456-7960457	shared	NA	NA
ENSMUSG00000012519	Mlkl	chr8:111338176-111338177	shared	NA	NA
ENSMUSG00000012535	Tnpo3	chr6:29609886-29609887	mouse	NA	NA
ENSMUSG00000013539	Tango2	chr16:18348102-18348103	mouse	NA	NA
ENSMUSG00000013662	Atad1	chr19:32712297-32712298	mouse	NA	NA
ENSMUSG00000013736	Trnt1	chr6:106769119-106769120	mouse	NA	NA
ENSMUSG00000013846	St3gal1	chr15:67176829-67176830	human	NA	NA
ENSMUSG00000014158	Trpv4	chr5:114658420-114658421	human	NA	NA
ENSMUSG00000014177	Tvp23b	chr11:62879454-62879455	human	NA	NA
ENSMUSG00000014226	Cacybp	chr1:160212874-160212875	mouse	NA	NA
ENSMUSG00000014301	Pam16	chr16:4624987-4624988	mouse	NA	NA
ENSMUSG00000014349	Ube2z	chr11:96065387-96065388	shared	NA	NA
ENSMUSG00000014418	Hps5	chr7:46796063-46796064	human	NA	NA
ENSMUSG00000014504	Srp19	chr18:34330846-34330847	shared	B2_Mm2_chr18:34354121-34354314	0.016142
ENSMUSG00000014599	Csf1	chr3:107760468-107760469	shared	NA	NA
ENSMUSG00000014601	Strip1	chr3:107631693-107631694	mouse	NA	NA
ENSMUSG00000014602	Kif1a	chr1:93101950-93101951	mouse	NA	NA
ENSMUSG00000014769	Psmb1	chr17:15499750-15499751	human	NA	NA
ENSMUSG00000014776	Nol3	chr8:105276139-105276140	mouse	NA	NA
ENSMUSG00000014837	RP23-127B8.5	chr8:105289863-105289864	mouse	NA	NA
ENSMUSG00000014846	Tppp3	chr8:105471525-105471526	mouse	NA	NA
ENSMUSG00000014856	Tmem208	chr8:105326353-105326354	human	NA	NA
ENSMUSG00000014859	E2f4	chr8:105297662-105297663	mouse	NA	NA
ENSMUSG00000014959	Gorasp2	chr2:70661575-70661576	mouse	NA	NA
ENSMUSG00000015002	Efr3a	chr15:65787033-65787034	mouse	NA	NA
ENSMUSG00000015214	Mtmr1	chrX:71364759-71364760	shared	B2_Mm2_chrX:71352104-71352137	0.023916
ENSMUSG00000015247	Nipsnap3b	chr4:53011879-53011880	mouse	NA	NA
ENSMUSG00000015305	Sash1	chr10:8886069-8886070	human	B2_Mm2_chr10:8925637-8925822	0.017149
ENSMUSG00000015312	Gadd45b	chr10:80930072-80930073	shared	B2_Mm2_chr10:80751200-80751354	0.023336
ENSMUSG00000015314	Slamf6	chr1:171917514-171917515	mouse	NA	NA
ENSMUSG00000015316	Slamf1	chr1:171767126-171767127	shared	NA	NA
ENSMUSG00000015363	Trabd	chr15:89075123-89075124	mouse	NA	NA
ENSMUSG00000015377	Dennd6b	chr15:89196495-89196496	mouse	NA	NA
ENSMUSG00000015396	Cd83	chr13:43784774-43784775	shared	NA	NA
ENSMUSG00000015501	Hivep2	chr10:13966074-13966075	shared	NA	NA
ENSMUSG00000015575	Atp6v0e	chr17:26676395-26676396	human	B2_Mm2_chr17:26705430-26705539	0.014831
ENSMUSG00000015605	Srf	chr17:46556161-46556162	human	B2_Mm2_chr17:46545328-46545508	0.041389
ENSMUSG00000015647	Lama5	chr2:180225858-180225859	human	NA	NA
ENSMUSG00000015656	Hspa8	chr9:40800983-40800984	shared	B2_Mm2_chr9:40758410-40758587	0.065363
ENSMUSG00000015671	Psma2	chr13:14613239-14613240	shared	NA	NA
ENSMUSG00000015709	Arnt2	chr7:84410175-84410176	human	NA	NA
ENSMUSG00000015733	Capza2	chr6:17636233-17636234	mouse	NA	NA
ENSMUSG00000015745	Plekho1	chr3:95996000-95996001	human	NA	NA
ENSMUSG00000015748	Prpf3	chr3:95855884-95855885	human	NA	NA
ENSMUSG00000015755	Tab2	chr10:7956229-7956230	mouse	NA	NA
ENSMUSG00000015839	Nfe2l2	chr2:75704640-75704641	human	B2_Mm2_chr2:75682405-75682600	0.022016
ENSMUSG00000015850	Adamtsl4	chr3:95687916-95687917	mouse	NA	NA
ENSMUSG00000015889	Lta4h	chr10:93453410-93453411	human	NA	NA
ENSMUSG00000015937	H2afy	chr13:56136360-56136361	mouse	NA	NA
ENSMUSG00000015942	Gtf2ird2	chr5:134184018-134184019	mouse	NA	NA
ENSMUSG00000015947	Fcgr1	chr3:96293968-96293969	mouse	NA	NA
ENSMUSG00000015950	Ncf1	chr5:134229624-134229625	shared	NA	NA
ENSMUSG00000016024	Lbp	chr2:158306492-158306493	mouse	NA	NA
ENSMUSG00000016194	Hsd11b1	chr1:193264074-193264075	human	NA	NA
ENSMUSG00000016206	H2-M3	chr17:37270219-37270220	mouse	NA	NA
ENSMUSG00000016239	Lonrf3	chrX:36328352-36328353	human	NA	NA
ENSMUSG00000016256	Ctsz	chr2:174439038-174439039	human	NA	NA
ENSMUSG00000016257	Prelid3b	chr2:174473080-174473081	human	NA	NA
ENSMUSG00000016382	Pls3	chrX:75875181-75875182	human	NA	NA
ENSMUSG00000016477	E2f3	chr13:29986062-29986063	mouse	NA	NA
ENSMUSG00000016495	Plgrkt	chr19:29367389-29367390	shared	NA	NA
ENSMUSG00000016496	Cd274	chr19:29367454-29367455	shared	NA	NA
ENSMUSG00000016498	Pdcd1lg2	chr19:29410918-29410919	shared	NA	NA
ENSMUSG00000016528	Mapkapk2	chr1:131097825-131097826	mouse	NA	NA
ENSMUSG00000016534	Lamp2	chrX:38456453-38456454	shared	NA	NA
ENSMUSG00000016554	Eif3d	chr15:77970812-77970813	mouse	NA	NA
ENSMUSG00000037400	Atp11b	chr3:35754105-35754106	mouse	B2_Mm2_chr3:35755834-35756023	0.11727
ENSMUSG00000016831	Tox4	chr14:52279145-52279146	mouse	NA	NA
ENSMUSG00000016833	Mrps18c	chr5:100798626-100798627	mouse	NA	NA
ENSMUSG00000016946	Kctd5	chr17:24073484-24073485	shared	NA	NA
ENSMUSG00000017002	Slpi	chr2:164389094-164389095	human	NA	NA
ENSMUSG00000017009	Sdc4	chr2:164443886-164443887	shared	NA	NA
ENSMUSG00000017057	Il13ra1	chrX:36112109-36112110	mouse	NA	NA
ENSMUSG00000017132	Cyth1	chr11:118248591-118248592	human	NA	NA
ENSMUSG00000017144	Rnd3	chr2:51149110-51149111	mouse	NA	NA
ENSMUSG00000017221	Psmd3	chr11:98682553-98682554	mouse	NA	NA
ENSMUSG00000017288	Vps53	chr11:76179646-76179647	mouse	NA	NA
ENSMUSG00000017412	Cacnb4	chr2:52676830-52676831	mouse	NA	NA
ENSMUSG00000017418	Arl5b	chr2:15049394-15049395	shared	NA	NA
ENSMUSG00000017615	Tnfaip1	chr11:78536331-78536332	mouse	NA	NA
ENSMUSG00000017652	Cd40	chr2:165055626-165055627	shared	NA	NA
ENSMUSG00000017670	Elmo2	chr2:165326478-165326479	mouse	NA	NA
ENSMUSG00000017677	Wsb1	chr11:79254670-79254671	human	NA	NA
ENSMUSG00000017697	Ada	chr2:163750238-163750239	mouse	NA	NA
ENSMUSG00000017715	Pgs1	chr11:117986291-117986292	mouse	NA	NA
ENSMUSG00000017756	Slc12a7	chr13:73733093-73733094	mouse	NA	NA
ENSMUSG00000035093	Secisbp2l	chr2:125782869-125782870	mouse	B2_Mm2_chr2:125775266-125775455	0.109112
ENSMUSG00000017830	Dhx58	chr11:100704270-100704271	shared	B2_Mm2_chr11:100702548-100702730	0.179449
ENSMUSG00000025059	Gk	chrX:85776818-85776819	mouse	B2_Mm2_chrX:85771261-85771292	0.10715
ENSMUSG00000017929	B4galt5	chr2:167349182-167349183	shared	B2_Mm2_chr2:167344976-167345161	0.036269
ENSMUSG00000018040	Rrp7a	chr15:83122800-83122801	mouse	NA	NA
ENSMUSG00000018076	Med13l	chr5:118560678-118560679	shared	NA	NA
ENSMUSG00000018143	Mafk	chr5:139791512-139791513	mouse	NA	NA
ENSMUSG00000018160	Med1	chr11:98193292-98193293	mouse	NA	NA
ENSMUSG00000018167	Stard3	chr11:98358367-98358368	mouse	NA	NA
ENSMUSG00000018171	Vmp1	chr11:86683835-86683836	shared	NA	NA
ENSMUSG00000097367	Gm26718	chr5:110259162-110259163	mouse	B2_Mm2_chr5:110231636-110231742	0.106606
ENSMUSG00000029249	Rest	chr5:77265490-77265491	mouse	B2_Mm2_chr5:77252490-77252664	0.105861
ENSMUSG00000018334	Ksr1	chr11:79146406-79146407	human	NA	NA
ENSMUSG00000018340	Anxa6	chr11:55033444-55033445	human	B2_Mm2_chr11:55013204-55013381	0.021625
ENSMUSG00000018341	Il12rb2	chr6:67376187-67376188	mouse	NA	NA
ENSMUSG00000018476	Kdm6b	chr11:69413674-69413675	mouse	NA	NA
ENSMUSG00000018559	Ctdnep1	chr11:69981155-69981156	mouse	NA	NA
ENSMUSG00000018565	Elp5	chr11:69982516-69982517	mouse	NA	NA
ENSMUSG00000018567	Gabarap	chr11:69991142-69991143	human	NA	NA
ENSMUSG00000018583	G3bp1	chr11:55469684-55469685	mouse	NA	NA
ENSMUSG00000018585	Atox1	chr11:55461238-55461239	human	NA	NA
ENSMUSG00000018654	Ikzf1	chr11:11685002-11685003	mouse	NA	NA
ENSMUSG00000018659	Pnpo	chr11:96943985-96943986	mouse	NA	NA
ENSMUSG00000018678	Sp2	chr11:96982958-96982959	mouse	NA	NA
ENSMUSG00000018707	Dync1h1	chr12:110601451-110601452	mouse	NA	NA
ENSMUSG00000018752	Tnfsfm13	chr11:69696097-69696098	human	B2_Mm2_chr11:69663102-69663225	0.037329
ENSMUSG00000018770	Atp5g3	chr2:73911325-73911326	mouse	NA	NA
ENSMUSG00000018796	Acsl1	chr8:46471036-46471037	shared	NA	NA
ENSMUSG00000018848	Rars	chr11:35834505-35834506	mouse	NA	NA
ENSMUSG00000018899	Irf1	chr11:53770013-53770014	shared	NA	NA
ENSMUSG00000018923	Med11	chr11:70451918-70451919	mouse	NA	NA
ENSMUSG00000026525	Opn3	chr1:175692775-175692776	mouse	B2_Mm2_chr1:175626089-175626272	0.102363
ENSMUSG00000006169	Clint1	chr11:45852050-45852051	mouse	B2_Mm2_chr11:45753141-45753308	0.095558
ENSMUSG00000018974	Sart3	chr5:113772509-113772510	human	NA	NA
ENSMUSG00000018983	E2f2	chr4:136172393-136172394	human	NA	NA
ENSMUSG00000019054	Fis1	chr5:136953274-136953275	mouse	NA	NA
ENSMUSG00000019082	Slc25a22	chr7:141437891-141437892	shared	NA	NA
ENSMUSG00000019124	Scrn1	chr6:54566488-54566489	human	NA	NA
ENSMUSG00000029410	Ppef2	chr5:92256277-92256278	mouse	B2_Mm2_chr5:92279606-92279780	0.094113
ENSMUSG00000019188	H13	chr2:152669460-152669461	mouse	NA	NA
ENSMUSG00000019189	Rnf145	chr11:44518963-44518964	mouse	NA	NA
ENSMUSG00000019210	Atp6v1e1	chr6:120822792-120822793	shared	NA	NA
ENSMUSG00000019254	Ppp1r12c	chr7:4501679-4501680	mouse	NA	NA
ENSMUSG00000031762	Mt2	chr8:94172663-94172664	mouse	B2_Mm2_chr8:94174129-94174291	0.093979
ENSMUSG00000110588	RP23-98C9.5	chr8:94173411-94173412	mouse	B2_Mm2_chr8:94174129-94174291	0.093978
ENSMUSG00000019487	Trip10	chr17:57249454-57249455	mouse	NA	NA
ENSMUSG00000019699	Akt3	chr1:177258202-177258203	mouse	NA	NA
ENSMUSG00000104985	RP23-50I16.1	chr5:121384009-121384010	mouse	B2_Mm2_chr5:121389850-121390039	0.093112
ENSMUSG00000019768	Esr1	chr10:4611592-4611593	mouse	NA	NA
ENSMUSG00000019782	Rwdd1	chr10:34019623-34019624	mouse	NA	NA
ENSMUSG00000019790	Stxbp5	chr10:9901078-9901079	mouse	NA	NA
ENSMUSG00000019791	Hint3	chr10:30629631-30629632	human	NA	NA
ENSMUSG00000019794	Katna1	chr10:7725999-7726000	mouse	NA	NA
ENSMUSG00000019795	Pcmt1	chr10:7681135-7681136	human	NA	NA
ENSMUSG00000087439	AC118260.5	chr5:110262160-110262161	mouse	B2_Mm2_chr5:110231636-110231742	0.092522
ENSMUSG00000019806	Aig1	chr10:13868979-13868980	mouse	NA	NA
ENSMUSG00000019818	Cd164	chr10:41519413-41519414	mouse	NA	NA
ENSMUSG00000019823	Mical1	chr10:41476313-41476314	human	NA	NA
ENSMUSG00000019842	Traf3ip2	chr10:39612933-39612934	mouse	NA	NA
ENSMUSG00000019843	Fyn	chr10:39368854-39368855	mouse	NA	NA
ENSMUSG00000019850	Tnfaip3	chr10:19015656-19015657	shared	NA	NA
ENSMUSG00000019853	Hebp2	chr10:18546075-18546076	human	B2_Mm2_chr10:18561543-18561710	0.016297
ENSMUSG00000019863	Qrsl1	chr10:43901744-43901745	human	NA	NA
ENSMUSG00000019864	Rtn4ip1	chr10:43901806-43901807	mouse	NA	NA
ENSMUSG00000019866	Aim1	chr10:44148852-44148853	shared	B2_Mm2_chr10:42760233-42760346	0.012813
ENSMUSG00000019868	Vta1	chr10:14705559-14705560	mouse	NA	NA
ENSMUSG00000019876	Pkib	chr10:57631980-57631981	mouse	NA	NA
ENSMUSG00000019877	Serinc1	chr10:57532529-57532530	mouse	NA	NA
ENSMUSG00000019916	P4ha1	chr10:59323295-59323296	mouse	NA	NA
ENSMUSG00000019927	Ube2d1	chr10:71285261-71285262	shared	NA	NA
ENSMUSG00000019947	Arid5b	chr10:68278739-68278740	mouse	NA	NA
ENSMUSG00000019966	Kitl	chr10:100015629-100015630	mouse	NA	NA
ENSMUSG00000019970	Sgk1	chr10:21882183-21882184	human	B2_Mm2_chr10:21889844-21889955	0.16235
ENSMUSG00000019979	Apaf1	chr10:91082769-91082770	mouse	NA	NA
ENSMUSG00000019990	Pde7b	chr10:20725077-20725078	mouse	NA	NA
ENSMUSG00000019998	Stx7	chr10:24149301-24149302	shared	NA	NA
ENSMUSG00000020020	Usp44	chr10:93831554-93831555	mouse	NA	NA
ENSMUSG00000020021	Fgd6	chr10:94036000-94036001	human	NA	NA
ENSMUSG00000020038	Cry1	chr10:85185063-85185064	shared	NA	NA
ENSMUSG00000020042	Btbd11	chr10:85386813-85386814	human	NA	NA
ENSMUSG00000020057	Dram1	chr10:88379079-88379080	shared	NA	NA
ENSMUSG00000020063	Sirt1	chr10:63381703-63381704	mouse	NA	NA
ENSMUSG00000020075	Ddx21	chr10:62602280-62602281	human	NA	NA
ENSMUSG00000020077	Srgn	chr10:62527450-62527451	mouse	NA	NA
ENSMUSG00000020085	Aifm2	chr10:61715262-61715263	human	NA	NA
ENSMUSG00000031671	Setd6	chr8:95715880-95715881	mouse	B2_Mm2_chr8:95719357-95719534	0.091458
ENSMUSG00000020089	Ppa1	chr10:61648551-61648552	shared	B2_Mm2_chr10:61670913-61671043	0.011066
ENSMUSG00000020107	Anapc16	chr10:60003134-60003135	mouse	NA	NA
ENSMUSG00000020111	Micu1	chr10:59702476-59702477	human	NA	NA
ENSMUSG00000020114	Cand1	chr10:119240054-119240055	mouse	NA	NA
ENSMUSG00000020115	Tbk1	chr10:121586786-121586787	mouse	NA	NA
ENSMUSG00000020116	Pno1	chr11:17211567-17211568	human	NA	NA
ENSMUSG00000020120	Plek	chr11:17052380-17052381	shared	NA	NA
ENSMUSG00000020122	Egfr	chr11:16752202-16752203	mouse	NA	NA
ENSMUSG00000020124	Usp15	chr10:123196994-123196995	shared	B2_Mm2_chr10:122801523-122801682	0.011868
ENSMUSG00000020128	Vps54	chr11:21239280-21239281	mouse	NA	NA
ENSMUSG00000020132	Rab21	chr10:115315593-115315594	mouse	NA	NA
ENSMUSG00000020133	RP23-341K9.1	chr10:80320536-80320537	mouse	NA	NA
ENSMUSG00000020134	Peli1	chr11:21091290-21091291	mouse	NA	NA
ENSMUSG00000020142	Slc1a4	chr11:20332712-20332713	human	B2_Mm2_chr11:20231617-20231794	0.041187
ENSMUSG00000020149	Rab1a	chr11:20201431-20201432	shared	B2_Mm2_chr11:20231617-20231794	0.052107
ENSMUSG00000020155	Kcnmb1	chr11:33963012-33963013	human	NA	NA
ENSMUSG00000020177	RP24-208F10.1	chr10:117238702-117238703	human	NA	NA
ENSMUSG00000020178	Adora2a	chr10:75316876-75316877	shared	NA	NA
ENSMUSG00000020184	Mdm2	chr10:117710757-117710758	shared	NA	NA
ENSMUSG00000020205	Phlda1	chr10:111506285-111506286	mouse	NA	NA
ENSMUSG00000037279	Ovol2	chr2:144332145-144332146	mouse	B2_Mm2_chr2:144338121-144338156	0.088646
ENSMUSG00000020225	Tmbim4	chr10:120201589-120201590	mouse	NA	NA
ENSMUSG00000020227	Irak3	chr10:120202129-120202130	human	NA	NA
ENSMUSG00000020228	Helb	chr10:120112986-120112987	human	NA	NA
ENSMUSG00000020238	Ncln	chr10:81496391-81496392	mouse	NA	NA
ENSMUSG00000020246	Hcfc2	chr10:82696159-82696160	mouse	NA	NA
ENSMUSG00000020248	Nfyb	chr10:82764143-82764144	mouse	NA	NA
ENSMUSG00000020256	Aldh1l2	chr10:83534139-83534140	human	NA	NA
ENSMUSG00000020267	Hint1	chr11:54866382-54866383	mouse	NA	NA
ENSMUSG00000017832	Hspb9	chr11:100713849-100713850	mouse	B2_Mm2_chr11:100702548-100702730	0.08672
ENSMUSG00000020275	Rel	chr11:23770969-23770970	mouse	NA	NA
ENSMUSG00000020277	Pfkl	chr10:78010082-78010083	mouse	NA	NA
ENSMUSG00000020300	Cpeb4	chr11:31872210-31872211	mouse	NA	NA
ENSMUSG00000020307	Cdc34	chr10:79682194-79682195	mouse	NA	NA
ENSMUSG00000002658	Gtf2f1	chr17:57011287-57011288	mouse	B2_Mm2_chr17:57017192-57017361	0.08668
ENSMUSG00000020332	Meikin	chr11:54370651-54370652	mouse	NA	NA
ENSMUSG00000020334	Slc22a4	chr11:54028089-54028090	human	NA	NA
ENSMUSG00000020346	Mgat1	chr11:49244190-49244191	shared	NA	NA
ENSMUSG00000020357	Flt4	chr11:49609262-49609263	mouse	NA	NA
ENSMUSG00000020366	Mapk9	chr11:49846750-49846751	mouse	NA	NA
ENSMUSG00000020386	Sar1b	chr11:51763686-51763687	mouse	NA	NA
ENSMUSG00000020387	Jade2	chr11:51857652-51857653	human	NA	NA
ENSMUSG00000020393	Kremen1	chr11:5261557-5261558	human	NA	NA
ENSMUSG00000073599	Ecscr	chr18:35722355-35722356	mouse	B2_Mm2_chr18:35709238-35709374	0.085875
ENSMUSG00000020407	Upp1	chr11:9118102-9118103	shared	NA	NA
ENSMUSG00000020413	Hus1	chr11:9011190-9011191	mouse	NA	NA
ENSMUSG00000097125	Gm26885	chr17:29491924-29491925	mouse	B2_Mm2_chr17:29498400-29498553	0.083309
ENSMUSG00000020422	Tns3	chr11:8664534-8664535	human	NA	NA
ENSMUSG00000020423	Btg2	chr1:134079119-134079120	mouse	NA	NA
ENSMUSG00000020432	Tcn2	chr11:3932158-3932159	human	NA	NA
ENSMUSG00000020440	Arf5	chr6:28423559-28423560	mouse	NA	NA
ENSMUSG00000020444	Guk1	chr11:59192211-59192212	shared	NA	NA
ENSMUSG00000020448	Rnf185	chr11:3452362-3452363	human	B2_Mm2_chr11:3442442-3442625	0.062527
ENSMUSG00000020451	Limk2	chr11:3409188-3409189	human	B2_Mm2_chr11:3442442-3442625	0.018336
ENSMUSG00000020455	Trim11	chr11:58978092-58978093	mouse	NA	NA
ENSMUSG00000020456	Ogdh	chr11:6291632-6291633	mouse	NA	NA
ENSMUSG00000020464	Pnpt1	chr11:29130743-29130744	mouse	NA	NA
ENSMUSG00000020475	Pgam2	chr11:5803732-5803733	mouse	NA	NA
ENSMUSG00000020476	Dbnl	chr11:5788487-5788488	mouse	NA	NA
ENSMUSG00000020483	Dynll2	chr11:87987532-87987533	mouse	NA	NA
ENSMUSG00000020496	Rnf187	chr11:58938915-58938916	mouse	NA	NA
ENSMUSG00000020516	Rps6kb1	chr11:86544804-86544805	mouse	NA	NA
ENSMUSG00000020536	Llgl1	chr11:60699722-60699723	mouse	NA	NA
ENSMUSG00000032507	Fbxl2	chr9:114046190-114046191	mouse	B2_Mm2_chr9:114027045-114027222	0.082219
ENSMUSG00000020564	Atxn7l1	chr12:33147692-33147693	mouse	NA	NA
ENSMUSG00000020572	Mampt	chr12:32819544-32819545	shared	NA	NA
ENSMUSG00000029500	Pgam5	chr5:110269912-110269913	mouse	B2_Mm2_chr5:110231636-110231742	0.082019
ENSMUSG00000020593	Lpin1	chr12:16610965-16610966	human	NA	NA
ENSMUSG00000020598	Nrcam	chr12:44328884-44328885	mouse	NA	NA
ENSMUSG00000020599	Rgs9	chr11:109298128-109298129	shared	NA	NA
ENSMUSG00000020601	Trib2	chr12:15816921-15816922	human	NA	NA
ENSMUSG00000020610	Amz2	chr11:109425945-109425946	human	NA	NA
ENSMUSG00000020611	Gna13	chr11:109362830-109362831	shared	NA	NA
ENSMUSG00000020614	Fam20a	chr11:109722278-109722279	human	NA	NA
ENSMUSG00000020621	Rdh14	chr12:10390771-10390772	human	NA	NA
ENSMUSG00000020630	Rnaseh1	chr12:28649601-28649602	mouse	NA	NA
ENSMUSG00000020638	Cmpk2	chr12:26469203-26469204	shared	NA	NA
ENSMUSG00000020641	Rsad2	chr12:26456451-26456452	shared	NA	NA
ENSMUSG00000020656	Grhl1	chr12:24572282-24572283	mouse	NA	NA
ENSMUSG00000020658	Efr3b	chr12:4038914-4038915	mouse	NA	NA
ENSMUSG00000020676	Ccl11	chr11:82057822-82057823	mouse	NA	NA
ENSMUSG00000020694	Tlk2	chr11:105178806-105178807	mouse	NA	NA
ENSMUSG00000020695	Mrc2	chr11:105292642-105292643	human	NA	NA
ENSMUSG00000020700	Map3k3	chr11:106084612-106084613	mouse	NA	NA
ENSMUSG00000028788	Ptp4a2	chr4:129811218-129811219	mouse	B2_Mm2_chr4:129789355-129789375	0.080046
ENSMUSG00000020715	Ern1	chr11:106487851-106487852	human	B2_Mm2_chr11:106478330-106478483	0.039134
ENSMUSG00000020717	Pecam1	chr11:106750627-106750628	mouse	NA	NA
ENSMUSG00000032849	Abcc4	chr14:118706218-118706219	mouse	B2_Mm2_chr14:118690847-118691036	0.079835
ENSMUSG00000020737	Hn1	chr11:115514386-115514387	mouse	NA	NA
ENSMUSG00000020741	Cluh	chr11:74649494-74649495	human	NA	NA
ENSMUSG00000020780	Srp68	chr11:116274216-116274217	mouse	NA	NA
ENSMUSG00000020804	Aanat	chr11:116586431-116586432	human	NA	NA
ENSMUSG00000020806	Rhbdf2	chr11:116627018-116627019	shared	NA	NA
ENSMUSG00000020812	RP23-313J14.6	chr11:116671659-116671660	mouse	NA	NA
ENSMUSG00000020826	Nos2	chr11:78920786-78920787	mouse	NA	NA
ENSMUSG00000020831	RP23-198E14.7	chr11:70237913-70237914	mouse	NA	NA
ENSMUSG00000020834	Dhrs13	chr11:78032279-78032280	mouse	NA	NA
ENSMUSG00000020840	Blmh	chr11:76924808-76924809	mouse	NA	NA
ENSMUSG00000020843	Timm22	chr11:76406951-76406952	mouse	NA	NA
ENSMUSG00000020844	Nxn	chr11:76399139-76399140	mouse	NA	NA
ENSMUSG00000020849	Ywhae	chr11:75732868-75732869	mouse	NA	NA
ENSMUSG00000112627	RP23-413G8.2	chr10:116949756-116949757	mouse	B2_Mm2_chr10:116944260-116944439	0.079014
ENSMUSG00000020864	Ankrd40	chr11:94328000-94328001	mouse	NA	NA
ENSMUSG00000032462	Pik3cb	chr9:99140620-99140621	mouse	B2_Mm2_chr9:99089606-99089794	0.07856
ENSMUSG00000020873	Slc35b1	chr11:95384691-95384692	mouse	NA	NA
ENSMUSG00000020884	Asgr1	chr11:70054084-70054085	human	NA	NA
ENSMUSG00000020900	Myh10	chr11:68691558-68691559	mouse	NA	NA
ENSMUSG00000021728	Emb	chr13:117208535-117208536	mouse	B2_Mm2_chr13:117223074-117223264	0.076814
ENSMUSG00000020922	Lsm12	chr11:102185295-102185296	mouse	NA	NA
ENSMUSG00000020946	Gosr2	chr11:103697897-103697898	mouse	NA	NA
ENSMUSG00000020952	Scfd1	chr12:51377509-51377510	mouse	NA	NA
ENSMUSG00000020956	Dtd2	chr12:52006500-52006501	human	NA	NA
ENSMUSG00000021024	Psma6	chr12:55384221-55384222	human	NA	NA
ENSMUSG00000021025	Nfkbia	chr12:55492646-55492647	shared	NA	NA
ENSMUSG00000024349	Tmem173	chr18:35740553-35740554	mouse	B2_Mm2_chr18:35746190-35746379	0.074118
ENSMUSG00000021583	Erap1	chr13:74639567-74639568	mouse	B2_Mm2_chr13:74639016-74639178	0.073952
ENSMUSG00000021048	Mthfd1	chr12:76255297-76255298	human	NA	NA
ENSMUSG00000021054	Sgpp1	chr12:75735728-75735729	human	NA	NA
ENSMUSG00000021061	Sptb	chr12:76710546-76710547	human	NA	NA
ENSMUSG00000021066	Atl1	chr12:69892613-69892614	mouse	NA	NA
ENSMUSG00000021067	Sav1	chr12:69987001-69987002	mouse	NA	NA
ENSMUSG00000106698	RP23-447A7.2	chr5:92290051-92290052	mouse	B2_Mm2_chr5:92279606-92279780	0.072399
ENSMUSG00000021109	Hif1a	chr12:73901374-73901375	mouse	NA	NA
ENSMUSG00000021114	Atp6v1d	chr12:78861637-78861638	mouse	NA	NA
ENSMUSG00000021116	Eif2s1	chr12:78861818-78861819	human	NA	NA
ENSMUSG00000021118	Plek2	chr12:78906963-78906964	mouse	NA	NA
ENSMUSG00000021125	Arg2	chr12:79130776-79130777	mouse	NA	NA
ENSMUSG00000021133	Susd6	chr12:80790509-80790510	shared	B2_Mm2_chr12:80818749-80818937	0.017513
ENSMUSG00000021140	Pcnx	chr12:81860022-81860023	shared	NA	NA
ENSMUSG00000024399	Ltb	chr17:35194438-35194439	mouse	B2_Mm2_chr17:35185761-35185930	0.071589
ENSMUSG00000021147	Wdr37	chr13:8871908-8871909	mouse	NA	NA
ENSMUSG00000021182	Ccdc88c	chr12:101029055-101029056	human	NA	NA
ENSMUSG00000021196	Pfkp	chr13:6648776-6648777	shared	NA	NA
ENSMUSG00000021200	Asb2	chr12:103356000-103356001	human	NA	NA
ENSMUSG00000021263	Degs2	chr12:108702314-108702315	mouse	NA	NA
ENSMUSG00000021266	Wars	chr12:108894173-108894174	shared	NA	NA
ENSMUSG00000021270	Hsp90aa1	chr12:110702727-110702728	human	NA	NA
ENSMUSG00000021277	Traf3	chr12:111166369-111166370	shared	NA	NA
ENSMUSG00000021280	Exoc3l4	chr12:111417016-111417017	shared	NA	NA
ENSMUSG00000021281	Tnfaip2	chr12:111442468-111442469	shared	NA	NA
ENSMUSG00000021298	Gpr132	chr12:112868227-112868228	mouse	NA	NA
ENSMUSG00000021322	Aoah	chr13:20794112-20794113	human	NA	NA
ENSMUSG00000021338	Lrrc16a	chr13:24280794-24280795	mouse	NA	NA
ENSMUSG00000021357	Exoc2	chr13:30974092-30974093	human	NA	NA
ENSMUSG00000021360	Gcnt2	chr13:40859753-40859754	mouse	NA	NA
ENSMUSG00000021366	Hivep1	chr13:42052020-42052021	mouse	NA	NA
ENSMUSG00000021367	Edn1	chr13:42301475-42301476	shared	NA	NA
ENSMUSG00000021371	Mcur1	chr13:43560190-43560191	mouse	NA	NA
ENSMUSG00000021374	Nup153	chr13:46727939-46727940	mouse	NA	NA
ENSMUSG00000021376	Tpmt	chr13:47044736-47044737	human	B2_Mm2_chr13:46958307-46958467	0.011475
ENSMUSG00000085604	Dhx58os	chr11:100687416-100687417	mouse	B2_Mm2_chr11:100702548-100702730	0.071227
ENSMUSG00000021408	Ripk1	chr13:34002362-34002363	mouse	NA	NA
ENSMUSG00000021411	Pxdc1	chr13:34653485-34653486	human	NA	NA
ENSMUSG00000021423	Ly86	chr13:37345207-37345208	mouse	NA	NA
ENSMUSG00000021451	Sema4d	chr13:51793746-51793747	human	NA	NA
ENSMUSG00000021453	Gadd45g	chr13:51846677-51846678	shared	NA	NA
ENSMUSG00000021460	Auh	chr13:52929680-52929681	mouse	NA	NA
ENSMUSG00000021482	Aaed1	chr13:64312709-64312710	human	B2_Mm2_chr13:64281237-64281422	0.011529
ENSMUSG00000021485	Mxd3	chr13:55329822-55329823	human	NA	NA
ENSMUSG00000021486	Prelid1	chr13:55320499-55320500	human	NA	NA
ENSMUSG00000021565	Slc6a19	chr13:73704864-73704865	mouse	NA	NA
ENSMUSG00000087135	RP24-374N16.5	chr9:40784180-40784181	mouse	B2_Mm2_chr9:40758410-40758587	0.066084
ENSMUSG00000021589	Rhobtb3	chr13:75943924-75943925	human	NA	NA
ENSMUSG00000021590	Spata9	chr13:75967149-75967150	human	NA	NA
ENSMUSG00000021591	Glrx	chr13:75839867-75839868	human	NA	NA
ENSMUSG00000021594	Srd5a1	chr13:69611441-69611442	human	B2_Mm2_chr13:69509735-69509881	0.014193
ENSMUSG00000021596	Mctp1	chr13:76384534-76384535	human	NA	NA
ENSMUSG00000021598	Med10	chr13:69802394-69802395	mouse	NA	NA
ENSMUSG00000021610	Clptm1l	chr13:73604005-73604006	mouse	NA	NA
ENSMUSG00000021614	Vcan	chr13:89742508-89742509	mouse	NA	NA
ENSMUSG00000021615	Xrcc4	chr13:90089607-90089608	mouse	NA	NA
ENSMUSG00000021619	Atg10	chr13:91223967-91223968	mouse	NA	NA
ENSMUSG00000021621	Zcchc9	chr13:91807704-91807705	mouse	NA	NA
ENSMUSG00000000555	Itga5	chr15:103366762-103366763	mouse	B2_Mm2_chr15:103394002-103394183	0.065623
ENSMUSG00000097404	Gm10814	chr19:6012619-6012620	mouse	B2_Mm2_chr19:6018525-6018714	0.065494
ENSMUSG00000021650	Ptcd2	chr13:99344704-99344705	mouse	NA	NA
ENSMUSG00000021669	Col4a3bp	chr13:96542617-96542618	human	NA	NA
ENSMUSG00000021676	Iqgap2	chr13:95891921-95891922	human	NA	NA
ENSMUSG00000021678	F2rl1	chr13:95525226-95525227	mouse	NA	NA
ENSMUSG00000021681	Aggf1	chr13:95375351-95375352	mouse	NA	NA
ENSMUSG00000021696	Elovl7	chr13:108214403-108214404	human	NA	NA
ENSMUSG00000021710	Nln	chr13:104109613-104109614	human	NA	NA
ENSMUSG00000064791	Snord14e	chr9:40804747-40804748	mouse	B2_Mm2_chr9:40758410-40758587	0.065361
ENSMUSG00000095118	Snord14d	chr9:40803994-40803995	mouse	B2_Mm2_chr9:40758410-40758587	0.065361
ENSMUSG00000021733	Slc4a7	chr14:14702278-14702279	mouse	NA	NA
ENSMUSG00000021737	Psmd6	chr14:14120983-14120984	mouse	NA	NA
ENSMUSG00000021738	Atxn7	chr14:13961439-13961440	shared	NA	NA
ENSMUSG00000021751	Acox2	chr14:8259352-8259353	human	NA	NA
ENSMUSG00000021756	Il6st	chr13:112464069-112464070	human	NA	NA
ENSMUSG00000021758	Ddx4	chr13:112652474-112652475	mouse	NA	NA
ENSMUSG00000021759	Plpp1	chr13:112800791-112800792	mouse	NA	NA
ENSMUSG00000021765	Fst	chr13:114458950-114458951	shared	NA	NA
ENSMUSG00000021771	Vdac2	chr14:21825237-21825238	shared	NA	NA
ENSMUSG00000021772	Nkiras1	chr14:18271135-18271136	mouse	NA	NA
ENSMUSG00000021774	Ube2e1	chr14:18331858-18331859	mouse	NA	NA
ENSMUSG00000021792	Fam213a	chr14:41013787-41013788	human	NA	NA
ENSMUSG00000021814	Anxa7	chr14:20480132-20480133	mouse	NA	NA
ENSMUSG00000021816	Ppp3cb	chr14:20546572-20546573	mouse	NA	NA
ENSMUSG00000021822	Plau	chr14:20836659-20836660	mouse	NA	NA
ENSMUSG00000021838	Samd4	chr14:46882853-46882854	human	NA	NA
ENSMUSG00000021840	Mapk1ip1l	chr14:47298265-47298266	mouse	NA	NA
ENSMUSG00000021843	Ktn1	chr14:47648447-47648448	mouse	NA	NA
ENSMUSG00000027287	Snap23	chr2:120567670-120567671	mouse	B2_Mm2_chr2:120575771-120575953	0.065275
ENSMUSG00000021868	Ppif	chr14:25694153-25694154	human	NA	NA
ENSMUSG00000021871	RP23-243M12.7	chr14:50944516-50944517	mouse	NA	NA
ENSMUSG00000021877	Arf4	chr14:26638073-26638074	mouse	NA	NA
ENSMUSG00000021880	Rnase6	chr14:51123907-51123908	mouse	NA	NA
ENSMUSG00000021890	Eaf1	chr14:31494398-31494399	human	NA	NA
ENSMUSG00000021891	Mettl6	chr14:31495039-31495040	human	NA	NA
ENSMUSG00000021892	Sh3bp5	chr14:31436077-31436078	human	NA	NA
ENSMUSG00000021895	Arhgef3	chr14:27114898-27114899	shared	NA	NA
ENSMUSG00000021905	Dph3	chr14:32085728-32085729	human	NA	NA
ENSMUSG00000021929	Kpna3	chr14:61439873-61439874	mouse	NA	NA
ENSMUSG00000021932	Rnaseh2b	chr14:62292588-62292589	mouse	NA	NA
ENSMUSG00000021948	Prkcd	chr14:30626209-30626210	human	NA	NA
ENSMUSG00000021959	Lats2	chr14:57758387-57758388	mouse	NA	NA
ENSMUSG00000021962	Dcp1a	chr14:30479534-30479535	mouse	NA	NA
ENSMUSG00000021972	Hmbox1	chr14:64949870-64949871	mouse	NA	NA
ENSMUSG00000021974	Fgf9	chr14:58070546-58070547	mouse	NA	NA
ENSMUSG00000021975	Ints9	chr14:64950044-64950045	mouse	NA	NA
ENSMUSG00000021978	Extl3	chr14:65149854-65149855	mouse	NA	NA
ENSMUSG00000021981	Cab39l	chr14:59440971-59440972	human	NA	NA
ENSMUSG00000021987	Mtmr6	chr14:60265227-60265228	mouse	NA	NA
ENSMUSG00000021990	Spata13	chr14:60634000-60634001	mouse	NA	NA
ENSMUSG00000022003	Slc25a30	chr14:75787036-75787037	human	NA	NA
ENSMUSG00000050671	Ism2	chr12:87299704-87299705	mouse	B2_Mm2_chr12:87276175-87276336	0.064857
ENSMUSG00000022013	Dnajc15	chr14:77875124-77875125	human	NA	NA
ENSMUSG00000022014	Epsti1	chr14:77904238-77904239	shared	NA	NA
ENSMUSG00000022018	Rgcc	chr14:79301644-79301645	mouse	NA	NA
ENSMUSG00000022035	Ccdc25	chr14:65837301-65837302	mouse	NA	NA
ENSMUSG00000022037	Clu	chr14:65968482-65968483	human	B2_Mm2_chr14:65870729-65870874	0.013134
ENSMUSG00000022052	Ppp2r2a	chr14:67072443-67072444	mouse	NA	NA
ENSMUSG00000022057	Adamdec1	chr14:68582094-68582095	human	NA	NA
ENSMUSG00000022092	Ppp3cc	chr14:70289470-70289471	human	NA	NA
ENSMUSG00000022094	Slc39a14	chr14:70351424-70351425	mouse	NA	NA
ENSMUSG00000022102	Dok2	chr14:70766035-70766036	mouse	NA	NA
ENSMUSG00000022119	Rbm26	chr14:105177326-105177327	mouse	NA	NA
ENSMUSG00000022126	Acod1	chr14:103046976-103046977	shared	NA	NA
ENSMUSG00000020397	Med7	chr11:46436924-46436925	mouse	B2_Mm2_chr11:46447633-46447743	0.064235
ENSMUSG00000022148	Fyb	chr15:6522852-6522853	human	NA	NA
ENSMUSG00000022150	Dab2	chr15:6299787-6299788	mouse	NA	NA
ENSMUSG00000022184	Fbxo4	chr15:3979572-3979573	mouse	NA	NA
ENSMUSG00000022186	Oxct1	chr15:4026382-4026383	mouse	NA	NA
ENSMUSG00000029580	Actb	chr5:142906753-142906754	mouse	B2_Mm2_chr5:142895733-142895818	0.063709
ENSMUSG00000022205	Sub1	chr15:11996982-11996983	human	NA	NA
ENSMUSG00000022208	Jph4	chr14:55116934-55116935	human	NA	NA
ENSMUSG00000022216	Psme1	chr14:55578122-55578123	shared	NA	NA
ENSMUSG00000022218	Tgm1	chr14:55713925-55713926	shared	NA	NA
ENSMUSG00000022220	Adcy4	chr14:55784094-55784095	mouse	NA	NA
ENSMUSG00000022234	Cct5	chr15:31601803-31601804	human	NA	NA
ENSMUSG00000022237	Ankrd33b	chr15:31367725-31367726	human	NA	NA
ENSMUSG00000022240	Ctnnd2	chr15:30172592-30172593	human	NA	NA
ENSMUSG00000022241	Tars	chr15:11399664-11399665	human	NA	NA
ENSMUSG00000022246	Rai14	chr15:10714623-10714624	mouse	NA	NA
ENSMUSG00000039497	Dse	chr10:34207714-34207715	mouse	B2_Mm2_chr10:34209801-34209981	0.063705
ENSMUSG00000022255	Mtdh	chr15:34082693-34082694	mouse	B2_Mm2_chr15:34097135-34097307	0.063084
ENSMUSG00000022270	Retreg1	chr15:25843179-25843180	human	NA	NA
ENSMUSG00000022283	Pabpc1	chr15:36609667-36609668	mouse	NA	NA
ENSMUSG00000022285	Ywhaz	chr15:36796928-36796929	mouse	NA	NA
ENSMUSG00000022292	Rrm2b	chr15:37961317-37961318	human	NA	NA
ENSMUSG00000022304	Dpys	chr15:39857469-39857470	human	NA	NA
ENSMUSG00000022309	Angpt1	chr15:42676976-42676977	mouse	NA	NA
ENSMUSG00000022329	Stk3	chr15:35178920-35178921	shared	NA	NA
ENSMUSG00000022359	Wdyhv1	chr15:58141376-58141377	human	B2_Mm2_chr15:58145934-58145999	0.305888
ENSMUSG00000022370	Mrpl13	chr15:55557747-55557748	mouse	NA	NA
ENSMUSG00000022377	Asap1	chr15:64382918-64382919	human	NA	NA
ENSMUSG00000022378	Fam49b	chr15:64060477-64060478	mouse	NA	NA
ENSMUSG00000022400	Rbx1	chr15:81466295-81466296	mouse	NA	NA
ENSMUSG00000022407	Adsl	chr15:80948489-80948490	human	NA	NA
ENSMUSG00000022425	Enpp2	chr15:54952891-54952892	human	NA	NA
ENSMUSG00000022456	2023-09-03	chr15:82274892-82274893	human	NA	NA
ENSMUSG00000022472	Desi1	chr15:82033861-82033862	human	NA	NA
ENSMUSG00000022477	Aco2	chr15:81872308-81872309	human	NA	NA
ENSMUSG00000022479	Vdr	chr15:97910629-97910630	mouse	NA	NA
ENSMUSG00000022498	Txndc11	chr16:11134649-11134650	human	NA	NA
ENSMUSG00000022500	Litaf	chr16:11066156-11066157	human	B2_Mm2_chr16:10970068-10970245	0.010332
ENSMUSG00000022501	Prm1	chr16:10805838-10805839	mouse	NA	NA
ENSMUSG00000022503	Nubp1	chr16:10411947-10411948	mouse	NA	NA
ENSMUSG00000022504	Ciita	chr16:10480058-10480059	shared	NA	NA
ENSMUSG00000022505	Emp2	chr16:10313967-10313968	mouse	NA	NA
ENSMUSG00000022508	Bcl6	chr16:23988851-23988852	human	NA	NA
ENSMUSG00000022517	Mgrn1	chr16:4886248-4886249	mouse	NA	NA
ENSMUSG00000022548	Apod	chr16:31314807-31314808	mouse	NA	NA
ENSMUSG00000022551	Cyc1	chr15:76343522-76343523	shared	NA	NA
ENSMUSG00000022552	Sharpin	chr15:76351110-76351111	mouse	NA	NA
ENSMUSG00000022561	Gpaa1	chr15:76331230-76331231	mouse	NA	NA
ENSMUSG00000022562	Oplah	chr15:76328014-76328015	human	NA	NA
ENSMUSG00000022564	Grina	chr15:76246763-76246764	shared	NA	NA
ENSMUSG00000022574	Naprt	chr15:75894480-75894481	human	NA	NA
ENSMUSG00000022575	Gsdmd	chr15:75862326-75862327	shared	NA	NA
ENSMUSG00000022584	Ly6c2	chr15:75111969-75111970	mouse	NA	NA
ENSMUSG00000029405	G3bp2	chr5:92083718-92083719	mouse	B2_Mm2_chr5:92107216-92107402	0.062511
ENSMUSG00000022587	Ly6e	chr15:74955050-74955051	mouse	NA	NA
ENSMUSG00000022607	Ptk2	chr15:73423279-73423280	mouse	NA	NA
ENSMUSG00000022615	Tymp	chr15:89377038-89377039	human	NA	NA
ENSMUSG00000022619	Mapk8ip2	chr15:89453912-89453913	human	B2_Mm2_chr15:89430491-89430679	0.042491
ENSMUSG00000081512	RP23-123G8.2	chr17:34214458-34214459	mouse	B2_Mm2_chr17:34206060-34206220	0.062112
ENSMUSG00000022641	Bbx	chr16:50432389-50432390	mouse	NA	NA
ENSMUSG00000022663	Atg3	chr16:45158784-45158785	human	NA	NA
ENSMUSG00000022684	Bfar	chr16:13671857-13671858	mouse	NA	NA
ENSMUSG00000022686	B3gnt5	chr16:19760207-19760208	mouse	NA	NA
ENSMUSG00000022687	Boc	chr16:44558896-44558897	mouse	NA	NA
ENSMUSG00000022710	Usp7	chr16:8792307-8792308	mouse	NA	NA
ENSMUSG00000022724	Riox2	chr16:59471774-59471775	mouse	NA	NA
ENSMUSG00000022744	Cldnd1	chr16:58727909-58727910	mouse	NA	NA
ENSMUSG00000022747	St3gal6	chr16:58524242-58524243	mouse	NA	NA
ENSMUSG00000022751	Nit2	chr16:57167340-57167341	human	NA	NA
ENSMUSG00000022755	Adgrg7	chr16:56795854-56795855	mouse	NA	NA
ENSMUSG00000022757	Tfg	chr16:56717449-56717450	mouse	NA	NA
ENSMUSG00000039512	Uhrf1bp1	chr17:27856489-27856490	mouse	B2_Mm2_chr17:27826636-27826802	0.061097
ENSMUSG00000022769	Sdf2l1	chr16:17132382-17132383	mouse	NA	NA
ENSMUSG00000022790	Igsf11	chr16:38892670-38892671	mouse	NA	NA
ENSMUSG00000024942	Capn1	chr19:6015824-6015825	mouse	B2_Mm2_chr19:6018525-6018714	0.060526
ENSMUSG00000022801	Lrch3	chr16:32914099-32914100	mouse	NA	NA
ENSMUSG00000022822	Abcc5	chr16:20426393-20426394	mouse	NA	NA
ENSMUSG00000022831	Hcls1	chr16:36934982-36934983	mouse	NA	NA
ENSMUSG00000022844	Pdia5	chr16:35490872-35490873	mouse	NA	NA
ENSMUSG00000022858	Tra2b	chr16:22266004-22266005	mouse	NA	NA
ENSMUSG00000022861	Dgkg	chr16:22657220-22657221	shared	NA	NA
ENSMUSG00000022863	Btg3	chr16:78377191-78377192	human	NA	NA
ENSMUSG00000022864	D16Ertd472e	chr16:78576707-78576708	shared	NA	NA
ENSMUSG00000022867	Usp25	chr16:77013705-77013706	shared	NA	NA
ENSMUSG00000022883	Robo1	chr16:72308305-72308306	human	NA	NA
ENSMUSG00000022889	Mrpl39	chr16:84735741-84735742	mouse	NA	NA
ENSMUSG00000022892	App	chr16:85173765-85173766	mouse	NA	NA
ENSMUSG00000022895	Ets2	chr16:95702406-95702407	mouse	NA	NA
ENSMUSG00000022898	Dscr3	chr16:94526829-94526830	human	NA	NA
ENSMUSG00000022900	Ildr1	chr16:36693977-36693978	mouse	NA	NA
ENSMUSG00000022901	Cd86	chr16:36666080-36666081	mouse	NA	NA
ENSMUSG00000022906	Parp9	chr16:35938469-35938470	shared	NA	NA
ENSMUSG00000022911	Arl13b	chr16:62847039-62847040	mouse	NA	NA
ENSMUSG00000022912	Pros1	chr16:62854306-62854307	mouse	NA	NA
ENSMUSG00000022913	Psmg1	chr16:95990902-95990903	human	NA	NA
ENSMUSG00000022947	Cbr3	chr16:93683214-93683215	human	NA	NA
ENSMUSG00000022952	Runx1	chr16:92826148-92826149	human	NA	NA
ENSMUSG00000022962	Gart	chr16:91646951-91646952	human	NA	NA
ENSMUSG00000022972	RP24-100B13.1	chr16:90935113-90935114	mouse	NA	NA
ENSMUSG00000022992	Kansl2	chr15:98534263-98534264	human	NA	NA
ENSMUSG00000023000	Dhh	chr15:98898539-98898540	mouse	NA	NA
ENSMUSG00000067203	H2-K2	chr17:33978789-33978790	mouse	B2_Mm2_chr17:33969030-33969208	0.059468
ENSMUSG00000023010	Tmbim6	chr15:99392881-99392882	mouse	NA	NA
ENSMUSG00000023030	Slc11a2	chr15:100425071-100425072	mouse	NA	NA
ENSMUSG00000023032	Slc4a8	chr15:100761746-100761747	mouse	NA	NA
ENSMUSG00000023045	Soat2	chr15:102150525-102150526	mouse	NA	NA
ENSMUSG00000023048	Prr13	chr15:102459027-102459028	mouse	NA	NA
ENSMUSG00000023067	Cdkn1a	chr17:29090978-29090979	shared	NA	NA
ENSMUSG00000023087	Noct	chr3:51224446-51224447	mouse	NA	NA
ENSMUSG00000023094	Msrb2	chr2:19371439-19371440	mouse	NA	NA
ENSMUSG00000023106	Denr	chr5:123907174-123907175	mouse	NA	NA
ENSMUSG00000023110	Prmt5	chr14:54517524-54517525	mouse	NA	NA
ENSMUSG00000023118	Sympk	chr7:19024376-19024377	human	NA	NA
ENSMUSG00000021624	Cd180	chr13:102693557-102693558	mouse	B2_Mm2_chr13:102682360-102682566	0.059006
ENSMUSG00000023206	Il15ra	chr2:11705289-11705290	shared	NA	NA
ENSMUSG00000023224	Serping1	chr2:84775443-84775444	shared	B2_Mm2_chr2:84768317-84768484	0.015947
ENSMUSG00000023249	Parp3	chr9:106476948-106476949	shared	NA	NA
ENSMUSG00000023272	Creld2	chr15:88819645-88819646	mouse	NA	NA
ENSMUSG00000023286	Ube2j2	chr4:155943830-155943831	mouse	NA	NA
ENSMUSG00000023307	2023-03-05	chr19:37207542-37207543	mouse	NA	NA
ENSMUSG00000023341	Mx2	chr16:97535307-97535308	mouse	NA	NA
ENSMUSG00000023349	Clec4n	chr6:123229842-123229843	human	NA	NA
ENSMUSG00000023460	Rab12	chr17:66519716-66519717	shared	NA	NA
ENSMUSG00000023473	Celsr3	chr9:108826319-108826320	human	NA	NA
ENSMUSG00000023755	Rhebl1	chr15:98894539-98894540	human	NA	NA
ENSMUSG00000023827	Agpat4	chr17:12118703-12118704	mouse	NA	NA
ENSMUSG00000023829	Slc22a1	chr17:12675837-12675838	human	NA	NA
ENSMUSG00000023830	Igf2r	chr17:12769663-12769664	human	NA	NA
ENSMUSG00000023852	Chd1	chr17:15704966-15704967	shared	NA	NA
ENSMUSG00000023903	Mmp25	chr17:23645268-23645269	shared	NA	NA
ENSMUSG00000023905	Tnfrsf12a	chr17:23677448-23677449	mouse	NA	NA
ENSMUSG00000023913	Pla2g7	chr17:43568097-43568098	human	B2_Mm2_chr17:43538560-43538733	0.018237
ENSMUSG00000023927	Satb1	chr17:51833289-51833290	mouse	NA	NA
ENSMUSG00000023939	Mrpl14	chr17:45686321-45686322	human	NA	NA
ENSMUSG00000023944	Hsp90ab1	chr17:45573270-45573271	human	NA	NA
ENSMUSG00000023947	Nfkbie	chr17:45555715-45555716	shared	NA	NA
ENSMUSG00000023952	Gtpbp2	chr17:46161031-46161032	mouse	NA	NA
ENSMUSG00000023959	Clic5	chr17:44188571-44188572	mouse	NA	NA
ENSMUSG00000023961	Enpp4	chr17:44105808-44105809	shared	NA	NA
ENSMUSG00000023982	Guca1a	chr17:47400583-47400584	mouse	NA	NA
ENSMUSG00000023988	Bysl	chr17:47611491-47611492	mouse	NA	NA
ENSMUSG00000092368	RP24-443D19.8	chr17:35994452-35994453	mouse	B2_Mm2_chr17:35999636-35999726	0.057613
ENSMUSG00000024013	Fgd2	chr17:29360913-29360914	shared	NA	NA
ENSMUSG00000024014	Pim1	chr17:29490811-29490812	shared	B2_Mm2_chr17:29498400-29498553	0.083308
ENSMUSG00000024018	Ccdc167	chr17:29717011-29717012	mouse	NA	NA
ENSMUSG00000024019	Cmtr1	chr17:29660594-29660595	mouse	NA	NA
ENSMUSG00000024030	Abcg1	chr17:31057697-31057698	mouse	NA	NA
ENSMUSG00000024036	Slc37a1	chr17:31295482-31295483	shared	NA	NA
ENSMUSG00000024043	Arhgap28	chr17:68004119-68004120	mouse	NA	NA
ENSMUSG00000024054	Smchd1	chr17:71475342-71475343	shared	NA	NA
ENSMUSG00000024066	Xdh	chr17:73950181-73950182	mouse	NA	NA
ENSMUSG00000024070	Prkd3	chr17:79020815-79020816	mouse	NA	NA
ENSMUSG00000024074	Crim1	chr17:78200247-78200248	shared	NA	NA
ENSMUSG00000024079	Eif2ak2	chr17:78882572-78882573	mouse	NA	NA
ENSMUSG00000029499	Pxmp2	chr5:110286185-110286186	mouse	B2_Mm2_chr5:110231636-110231742	0.057234
ENSMUSG00000024084	Qpct	chr17:79051905-79051906	human	NA	NA
ENSMUSG00000024085	Man2a1	chr17:64600735-64600736	mouse	NA	NA
ENSMUSG00000024091	Vapa	chr17:65613554-65613555	mouse	NA	NA
ENSMUSG00000024095	Hnrnpll	chr17:80062333-80062334	human	NA	NA
ENSMUSG00000024097	Srsf7	chr17:80207304-80207305	human	NA	NA
ENSMUSG00000024098	Twsg1	chr17:65951186-65951187	mouse	NA	NA
ENSMUSG00000024121	Atp6v0c	chr17:24169701-24169702	shared	NA	NA
ENSMUSG00000024132	Eci1	chr17:24426682-24426683	mouse	NA	NA
ENSMUSG00000024135	Srbd1	chr17:86145174-86145175	human	NA	NA
ENSMUSG00000024143	Rhoq	chr17:86963081-86963082	shared	B2_Mm2_chr17:86918888-86919074	0.010349
ENSMUSG00000107961	RP23-20K24.11	chr6:86733488-86733489	mouse	B2_Mm2_chr6:86773134-86773210	0.057155
ENSMUSG00000039678	Tbc1d13	chr2:30133745-30133746	mouse	B2_Mm2_chr2:30128910-30129091	0.057131
ENSMUSG00000024164	C3	chr17:57228135-57228136	mouse	NA	NA
ENSMUSG00000024193	Phf1	chr17:26933126-26933127	human	NA	NA
ENSMUSG00000092550	RP23-123G8.16	chr17:34205448-34205449	mouse	B2_Mm2_chr17:34206060-34206220	0.056531
ENSMUSG00000042719	Naa25	chr5:121397935-121397936	mouse	B2_Mm2_chr5:121389850-121390039	0.056059
ENSMUSG00000112220	RP24-198I16.6	chr10:122792482-122792483	mouse	B2_Mm2_chr10:122792599-122792786	0.054964
ENSMUSG00000024231	Cul2	chr18:3382987-3382988	mouse	NA	NA
ENSMUSG00000020211	Sf3a2	chr10:80798197-80798198	mouse	B2_Mm2_chr10:80751200-80751354	0.054104
ENSMUSG00000024242	Map4k3	chr17:80728092-80728093	human	NA	NA
ENSMUSG00000024245	Tmem178	chr17:80944631-80944632	mouse	NA	NA
ENSMUSG00000024247	Pkdcc	chr17:83215291-83215292	mouse	NA	NA
ENSMUSG00000024290	Rock1	chr18:10181791-10181792	mouse	NA	NA
ENSMUSG00000024308	Tapbp	chr17:33915898-33915899	shared	NA	NA
ENSMUSG00000024334	H2-Oa	chr17:34092339-34092340	shared	NA	NA
ENSMUSG00000024335	Brd2	chr17:34122633-34122634	mouse	NA	NA
ENSMUSG00000024338	Psmb8	chr17:34197720-34197721	shared	B2_Mm2_chr17:34206060-34206220	0.01676
ENSMUSG00000020732	Rab37	chr11:115091430-115091431	mouse	B2_Mm2_chr11:115080395-115080583	0.053571
ENSMUSG00000024340	Btnl2	chr17:34354821-34354822	mouse	NA	NA
ENSMUSG00000024346	Pfdn1	chr18:36454494-36454495	human	B2_Mm2_chr18:35709238-35709374	0.023225
ENSMUSG00000027639	Samhd1	chr2:157135264-157135265	mouse	B2_Mm2_chr2:157142214-157142364	0.052985
ENSMUSG00000024359	Hspa9	chr18:34954356-34954357	human	NA	NA
ENSMUSG00000107846	RP24-430K15.3	chr6:113679218-113679219	mouse	B2_Mm2_chr6:113663382-113663419	0.052977
ENSMUSG00000024371	C2	chr17:34898264-34898265	human	B2_Mm2_chr17:34952918-34953069	0.048281
ENSMUSG00000024378	Stard4	chr18:33213861-33213862	human	NA	NA
ENSMUSG00000024388	Myo7b	chr18:32036960-32036961	human	NA	NA
ENSMUSG00000096976	Gm26882	chr9:90094177-90094178	mouse	B2_Mm2_chr9:90085139-90085298	0.051714
ENSMUSG00000024401	Tnf	chr17:35202006-35202007	shared	B2_Mm2_chr17:35185761-35185930	0.016602
ENSMUSG00000024404	Riok3	chr18:12128849-12128850	shared	NA	NA
ENSMUSG00000024410	AC102096.1	chr18:12168716-12168717	human	NA	NA
ENSMUSG00000024421	Lama3	chr18:12333818-12333819	human	NA	NA
ENSMUSG00000039231	Suv39h1	chrX:8074759-8074760	mouse	B2_Mm2_chrX:8091196-8091373	0.051501
ENSMUSG00000024431	Nr3c1	chr18:39491300-39491301	human	NA	NA
ENSMUSG00000024456	Diaph1	chr18:37935475-37935476	shared	NA	NA
ENSMUSG00000024457	Trim26	chr17:36837133-36837134	shared	NA	NA
ENSMUSG00000024462	Gabbr1	chr17:37045965-37045966	human	NA	NA
ENSMUSG00000024472	Dcp2	chr18:44380501-44380502	mouse	NA	NA
ENSMUSG00000024486	Hbegf	chr18:36515804-36515805	shared	NA	NA
ENSMUSG00000024493	Lars	chr18:42262121-42262122	mouse	NA	NA
ENSMUSG00000024498	Tcerg1	chr18:42511509-42511510	mouse	NA	NA
ENSMUSG00000024503	Spink1	chr18:43737236-43737237	human	NA	NA
ENSMUSG00000024513	Mbd2	chr18:70568188-70568189	shared	NA	NA
ENSMUSG00000024524	Gnal	chr18:67088335-67088336	mouse	NA	NA
ENSMUSG00000024535	Snx24	chr18:53245661-53245662	mouse	NA	NA
ENSMUSG00000024539	Ptpn2	chr18:67724594-67724595	shared	NA	NA
ENSMUSG00000024548	Setbp1	chr18:79109390-79109391	human	NA	NA
ENSMUSG00000024575	Pde6a	chr18:61220481-61220482	mouse	NA	NA
ENSMUSG00000024581	Napg	chr18:62977835-62977836	mouse	NA	NA
ENSMUSG00000024588	Fech	chr18:64489065-64489066	human	NA	NA
ENSMUSG00000024590	Lmnb1	chr18:56707812-56707813	human	NA	NA
ENSMUSG00000024601	Isoc1	chr18:58659481-58659482	shared	NA	NA
ENSMUSG00000024610	Cd74	chr18:60803847-60803848	human	NA	NA
ENSMUSG00000024639	Gnaq	chr19:16132830-16132831	mouse	NA	NA
ENSMUSG00000024640	Psat1	chr19:15947336-15947337	human	NA	NA
ENSMUSG00000024642	Tle4	chr19:14598050-14598051	mouse	NA	NA
ENSMUSG00000024644	Cndp2	chr18:84685632-84685633	shared	B2_Mm2_chr18:84683670-84683868	0.064624
ENSMUSG00000024646	Cyb5a	chr18:84851337-84851338	human	B2_Mm2_chr18:84683670-84683868	0.018494
ENSMUSG00000024666	Tmem138	chr19:10577361-10577362	human	NA	NA
ENSMUSG00000024668	Sdhaf2	chr19:10525208-10525209	mouse	NA	NA
ENSMUSG00000024675	Ms4a4c	chr19:11404769-11404770	mouse	NA	NA
ENSMUSG00000024679	Ms4a6d	chr19:11604848-11604849	mouse	NA	NA
ENSMUSG00000024712	Rfk	chr19:17394042-17394043	mouse	NA	NA
ENSMUSG00000024732	Ccdc86	chr19:10949265-10949266	mouse	NA	NA
ENSMUSG00000024736	Tmem132a	chr19:10869939-10869940	shared	NA	NA
ENSMUSG00000024737	Slc15a3	chr19:10839726-10839727	shared	NA	NA
ENSMUSG00000024754	Tmem2	chr19:21778341-21778342	mouse	NA	NA
ENSMUSG00000024772	Ehd1	chr19:6276724-6276725	shared	NA	NA
ENSMUSG00000024774	Ankrd22	chr19:34166052-34166053	human	B2_Mm2_chr19:34471720-34471895	0.010362
ENSMUSG00000024776	Stambpl1	chr19:34192228-34192229	human	B2_Mm2_chr19:34471720-34471895	0.014664
ENSMUSG00000024777	Ppp2r5b	chr19:6235871-6235872	mouse	NA	NA
ENSMUSG00000089636	AC148988.2	chr7:19258491-19258492	mouse	B2_Mm2_chr7:19281806-19281951	0.049661
ENSMUSG00000024786	AC127556.1	chr19:6184387-6184388	mouse	NA	NA
ENSMUSG00000024787	Snx15	chr19:6128303-6128304	mouse	NA	NA
ENSMUSG00000024789	Jak2	chr19:29251827-29251828	shared	NA	NA
ENSMUSG00000024803	Ankrd1	chr19:36119843-36119844	human	NA	NA
ENSMUSG00000024805	Pcgf5	chr19:36348308-36348309	shared	NA	NA
ENSMUSG00000021039	Snw1	chr12:87472273-87472274	mouse	B2_Mm2_chr12:87406808-87406992	0.048919
ENSMUSG00000006782	Cnp	chr11:100574903-100574904	mouse	B2_Mm2_chr11:100702548-100702730	0.047862
ENSMUSG00000024818	Slc25a45	chr19:5877807-5877808	human	B2_Mm2_chr19:5786990-5787151	0.016823
ENSMUSG00000024218	Taf11	chr17:27909241-27909242	mouse	B2_Mm2_chr17:27826636-27826802	0.047375
ENSMUSG00000024826	Dpf2	chr19:5913009-5913010	mouse	NA	NA
ENSMUSG00000005299	Letm1	chr5:33782816-33782817	mouse	B2_Mm2_chr5:33802852-33803022	0.046399
ENSMUSG00000024855	Pacs1	chr19:5273118-5273119	mouse	NA	NA
ENSMUSG00000024887	Asah2	chr19:32061468-32061469	mouse	NA	NA
ENSMUSG00000024896	Minpp1	chr19:32485768-32485769	mouse	NA	NA
ENSMUSG00000024899	Papss2	chr19:32620004-32620005	mouse	NA	NA
ENSMUSG00000024908	Ppp6r3	chr19:3575748-3575749	mouse	NA	NA
ENSMUSG00000024910	Ctsw	chr19:5468497-5468498	human	B2_Mm2_chr19:5473006-5473200	0.104618
ENSMUSG00000024912	Fosl1	chr19:5447702-5447703	human	B2_Mm2_chr19:5473006-5473200	0.018896
ENSMUSG00000032187	Smarca4	chr9:21616168-21616169	mouse	B2_Mm2_chr9:21609897-21609985	0.043955
ENSMUSG00000024944	Arl2	chr19:6141405-6141406	mouse	NA	NA
ENSMUSG00000024949	Sf1	chr19:6363689-6363690	mouse	NA	NA
ENSMUSG00000024952	Rps6ka4	chr19:6840600-6840601	mouse	NA	NA
ENSMUSG00000024953	Prdx5	chr19:6910105-6910106	shared	NA	NA
ENSMUSG00000024955	Esrra	chr19:6921812-6921813	shared	NA	NA
ENSMUSG00000024966	Stip1	chr19:7040025-7040026	human	NA	NA
ENSMUSG00000069874	Irgm2	chr11:58199617-58199618	mouse	B2_Mm2_chr11:58191280-58191441	0.043425
ENSMUSG00000024981	Acsl5	chr19:55251937-55251938	shared	NA	NA
ENSMUSG00000024985	Tcf7l2	chr19:55741809-55741810	shared	NA	NA
ENSMUSG00000025017	Pik3ap1	chr19:41385069-41385070	shared	B2_Mm2_chr19:41334772-41334787	0.014626
ENSMUSG00000078853	Igtp	chr11:58199555-58199556	mouse	B2_Mm2_chr11:58191280-58191441	0.043425
ENSMUSG00000025040	Fundc1	chrX:17572324-17572325	mouse	NA	NA
ENSMUSG00000085486	RP23-382C19.3	chr11:101599255-101599256	mouse	B2_Mm2_chr11:101627708-101627786	0.043219
ENSMUSG00000032175	Tyk2	chr9:21131242-21131243	mouse	B2_Mm2_chr9:21137136-21137222	0.043134
ENSMUSG00000025068	Gsto1	chr19:47854969-47854970	human	NA	NA
ENSMUSG00000025076	Casp7	chr19:56397128-56397129	shared	NA	NA
ENSMUSG00000025089	Gfra1	chr19:58455908-58455909	mouse	NA	NA
ENSMUSG00000025132	Arhgdia	chr11:120581623-120581624	mouse	NA	NA
ENSMUSG00000025161	Slc16a3	chr11:120948479-120948480	mouse	NA	NA
ENSMUSG00000025162	Csnk1d	chr11:120991329-120991330	mouse	NA	NA
ENSMUSG00000025165	Sectm1a	chr11:121081219-121081220	mouse	NA	NA
ENSMUSG00000025171	Ubtd1	chr19:41981762-41981763	mouse	NA	NA
ENSMUSG00000025198	Erlin1	chr19:44069784-44069785	human	NA	NA
ENSMUSG00000025199	Chuk	chr19:44107479-44107480	shared	NA	NA
ENSMUSG00000025225	Nfkb2	chr19:46304736-46304737	shared	NA	NA
ENSMUSG00000025228	Actr1a	chr19:46395734-46395735	mouse	NA	NA
ENSMUSG00000025234	Arih1	chr9:59486617-59486618	mouse	NA	NA
ENSMUSG00000025236	Adpgk	chr9:59291557-59291558	human	NA	NA
ENSMUSG00000025239	Limd1	chr9:123478705-123478706	mouse	NA	NA
ENSMUSG00000025246	Tbl1x	chrX:77511012-77511013	mouse	NA	NA
ENSMUSG00000025260	Hsd17b10	chrX:152001844-152001845	mouse	NA	NA
ENSMUSG00000025278	Flnb	chr14:7817956-7817957	mouse	NA	NA
ENSMUSG00000025279	Dnase1l3	chr14:7994572-7994573	mouse	NA	NA
ENSMUSG00000025283	Sat1	chrX:155216448-155216449	human	NA	NA
ENSMUSG00000025287	Acot9	chrX:155262442-155262443	mouse	NA	NA
ENSMUSG00000025323	Sp4	chr12:118301439-118301440	human	NA	NA
ENSMUSG00000025324	Atp10a	chr7:58656165-58656166	mouse	NA	NA
ENSMUSG00000025330	Padi4	chr4:140774235-140774236	human	NA	NA
ENSMUSG00000038587	Akap12	chr10:4266379-4266380	mouse	B2_Mm2_chr10:4270976-4271146	0.04249
ENSMUSG00000025340	Rabgef1	chr5:130171797-130171798	mouse	NA	NA
ENSMUSG00000025347	Mettl7b	chr10:128960987-128960988	human	NA	NA
ENSMUSG00000025348	Itga7	chr10:128933817-128933818	human	NA	NA
ENSMUSG00000025350	Rdh5	chr10:128922887-128922888	human	NA	NA
ENSMUSG00000025351	Cd63	chr10:128900988-128900989	human	NA	NA
ENSMUSG00000025357	Dgka	chr10:128744854-128744855	mouse	NA	NA
ENSMUSG00000025393	Atp5b	chr10:128083272-128083273	shared	B2_Mm2_chr10:128080623-128080813	0.058453
ENSMUSG00000025401	Myo1a	chr10:127705169-127705170	human	NA	NA
ENSMUSG00000025402	Nab2	chr10:127668567-127668568	mouse	NA	NA
ENSMUSG00000025408	Ddit3	chr10:127290773-127290774	human	NA	NA
ENSMUSG00000025417	Pip4k2c	chr10:127211584-127211585	human	NA	NA
ENSMUSG00000025429	Pstpip2	chr18:77794544-77794545	shared	NA	NA
ENSMUSG00000025461	Cd163l1	chr7:140218266-140218267	human	NA	NA
ENSMUSG00000025466	Fuom	chr7:140102440-140102441	human	NA	NA
ENSMUSG00000025485	Ric8	chr7:140856956-140856957	mouse	NA	NA
ENSMUSG00000025486	Sirt3	chr7:140882308-140882309	mouse	NA	NA
ENSMUSG00000025487	Psmd13	chr7:140881967-140881968	mouse	NA	NA
ENSMUSG00000078921	Tgtp2	chr11:49064205-49064206	mouse	B2_Mm2_chr11:49068200-49068381	0.042331
ENSMUSG00000040097	Flywch1	chr17:23771601-23771602	mouse	B2_Mm2_chr17:23754991-23755184	0.042122
ENSMUSG00000025498	Irf7	chr7:141266480-141266481	shared	NA	NA
ENSMUSG00000025499	Hras	chr7:141194004-141194005	mouse	NA	NA
ENSMUSG00000025511	Tspan4	chr7:141475239-141475240	mouse	NA	NA
ENSMUSG00000025521	Tmem192	chr8:64947184-64947185	shared	NA	NA
ENSMUSG00000025525	Apool	chrX:112311333-112311334	mouse	NA	NA
ENSMUSG00000025558	Dock9	chr14:121797836-121797837	human	NA	NA
ENSMUSG00000025591	Tma16	chr8:66486529-66486530	mouse	NA	NA
ENSMUSG00000025612	Bach1	chr16:87698944-87698945	shared	NA	NA
ENSMUSG00000025616	Usp16	chr16:87454702-87454703	mouse	NA	NA
ENSMUSG00000020547	Bzw2	chr12:36158079-36158080	mouse	B2_Mm2_chr12:36037000-36037062	0.041268
ENSMUSG00000027288	Zfp106	chr2:120563842-120563843	mouse	B2_Mm2_chr2:120575771-120575953	0.040537
ENSMUSG00000025646	Atrip	chr9:109074123-109074124	mouse	NA	NA
ENSMUSG00000025647	Shisa5	chr9:109038564-109038565	mouse	NA	NA
ENSMUSG00000025742	Prps2	chrX:167382748-167382749	human	NA	NA
ENSMUSG00000025743	Sdc3	chr4:130792536-130792537	human	NA	NA
ENSMUSG00000025757	Hspa4l	chr3:40744494-40744495	human	NA	NA
ENSMUSG00000025762	Larp1b	chr3:40950353-40950354	mouse	NA	NA
ENSMUSG00000025777	Gdap1	chr1:17145361-17145362	human	NA	NA
ENSMUSG00000062352	Itgb1bp1	chr12:21286283-21286284	mouse	B2_Mm2_chr12:21369478-21369636	0.040441
ENSMUSG00000025791	Pgm2	chr4:99929413-99929414	mouse	NA	NA
ENSMUSG00000025804	Ccr1	chr9:123968691-123968692	mouse	NA	NA
ENSMUSG00000035242	Oaz1	chr10:80826655-80826656	mouse	B2_Mm2_chr10:80751200-80751354	0.039708
ENSMUSG00000025855	Prkar1b	chr5:139150000-139150001	mouse	NA	NA
ENSMUSG00000025856	Pdgfa	chr5:138997369-138997370	shared	NA	NA
ENSMUSG00000025869	Nop16	chr13:54590089-54590090	human	NA	NA
ENSMUSG00000025871	RP23-452K4.2	chr13:54565434-54565435	mouse	NA	NA
ENSMUSG00000025875	Tspan17	chr13:54789376-54789377	human	NA	NA
ENSMUSG00000057367	Birc2	chr9:7837063-7837064	mouse	B2_Mm2_chr9:7869333-7869371	0.039644
ENSMUSG00000030188	Magohb	chr6:131293243-131293244	mouse	B2_Mm2_chr6:131290533-131290723	0.039332
ENSMUSG00000025887	Casp12	chr9:5345429-5345430	mouse	NA	NA
ENSMUSG00000025888	Casp1	chr9:5298516-5298517	mouse	NA	NA
ENSMUSG00000025889	Snca	chr6:60829854-60829855	human	NA	NA
ENSMUSG00000090231	Cfb	chr17:34862517-34862518	mouse	B2_Mm2_chr17:34952918-34953069	0.03916
ENSMUSG00000025911	Adhfe1	chr1:9547947-9547948	mouse	NA	NA
ENSMUSG00000025915	Sgk3	chr1:9798106-9798107	mouse	NA	NA
ENSMUSG00000025917	Cops5	chr1:10038167-10038168	mouse	NA	NA
ENSMUSG00000025931	Paqr8	chr1:20890605-20890606	human	NA	NA
ENSMUSG00000025940	Tmem70	chr1:16665206-16665207	human	B2_Mm2_chr1:16671106-16671294	0.046756
ENSMUSG00000074406	Zfp628	chr7:4915216-4915217	mouse	B2_Mm2_chr7:4865130-4865296	0.03857
ENSMUSG00000025959	Klf7	chr1:64122281-64122282	mouse	NA	NA
ENSMUSG00000025969	Nrp2	chr1:62703284-62703285	mouse	NA	NA
ENSMUSG00000025981	Coq10b	chr1:55052769-55052770	shared	NA	NA
ENSMUSG00000025997	Ikzf2	chr1:69687244-69687245	mouse	NA	NA
ENSMUSG00000026011	Ctla4	chr1:60886999-60887000	human	NA	NA
ENSMUSG00000026029	Casp8	chr1:58795373-58795374	mouse	NA	NA
ENSMUSG00000026031	Cflar	chr1:58711507-58711508	shared	NA	NA
ENSMUSG00000026062	Slc9a2	chr1:40680573-40680574	mouse	NA	NA
ENSMUSG00000026068	Il18rap	chr1:40515361-40515362	mouse	NA	NA
ENSMUSG00000026073	Il1r2	chr1:40074078-40074079	human	NA	NA
ENSMUSG00000026078	Pdcl3	chr1:38985607-38985608	human	NA	NA
ENSMUSG00000026087	Mrpl30	chr1:37890476-37890477	mouse	NA	NA
ENSMUSG00000026088	Mitd1	chr1:37890410-37890411	shared	NA	NA
ENSMUSG00000026090	AC140321.1	chr1:37720084-37720085	mouse	NA	NA
ENSMUSG00000026103	Gls	chr1:52233231-52233232	shared	NA	NA
ENSMUSG00000026104	Stat1	chr1:52119439-52119440	shared	NA	NA
ENSMUSG00000026107	Nabp1	chr1:51478424-51478425	mouse	NA	NA
ENSMUSG00000026110	Mgat4a	chr1:37541015-37541016	mouse	NA	NA
ENSMUSG00000026111	Unc50	chr1:37430138-37430139	mouse	NA	NA
ENSMUSG00000026112	Coa5	chr1:37430102-37430103	mouse	NA	NA
ENSMUSG00000026113	Inpp4a	chr1:37299864-37299865	human	NA	NA
ENSMUSG00000026116	Tmem131	chr1:36943665-36943666	shared	NA	NA
ENSMUSG00000026121	Sema4c	chr1:36558348-36558349	human	NA	NA
ENSMUSG00000026131	Dst	chr1:33908224-33908225	mouse	NA	NA
ENSMUSG00000026142	Rhbdd1	chr1:82316451-82316452	human	NA	NA
ENSMUSG00000026150	Mff	chr1:82724889-82724890	mouse	NA	NA
ENSMUSG00000035208	Slfn8	chr11:83020809-83020810	mouse	B2_Mm2_chr11:83039171-83039355	0.038445
ENSMUSG00000026162	Nhej1	chr1:75125199-75125200	human	NA	NA
ENSMUSG00000026180	Cxcr2	chr1:74153988-74153989	mouse	NA	NA
ENSMUSG00000026202	Tuba4a	chr1:75219864-75219865	human	NA	NA
ENSMUSG00000026209	Dnpep	chr1:75317989-75317990	human	NA	NA
ENSMUSG00000026219	Trip12	chr1:84840515-84840516	mouse	NA	NA
ENSMUSG00000026222	Sp100	chr1:85649987-85649988	mouse	NA	NA
ENSMUSG00000026271	Gpr35	chr1:92950864-92950865	mouse	NA	NA
ENSMUSG00000026289	Atg16l1	chr1:87755869-87755870	mouse	NA	NA
ENSMUSG00000026303	Mlph	chr1:90915084-90915085	human	NA	NA
ENSMUSG00000026307	Scly	chr1:91298337-91298338	mouse	NA	NA
ENSMUSG00000026313	Hdac4	chr1:92195698-92195699	human	NA	NA
ENSMUSG00000026358	Rgs1	chr1:144249241-144249242	mouse	NA	NA
ENSMUSG00000026361	Cdc73	chr1:143702892-143702893	mouse	NA	NA
ENSMUSG00000026365	Cfh	chr1:140183763-140183764	mouse	NA	NA
ENSMUSG00000026383	Epb41l5	chr1:119648999-119649000	human	B2_Mm2_chr1:118311715-118311901	0.010477
ENSMUSG00000026395	Ptprc	chr1:138175707-138175708	mouse	NA	NA
ENSMUSG00000063236	RP24-324P21.9	chr15:76948505-76948506	mouse	B2_Mm2_chr15:76926025-76926206	0.038413
ENSMUSG00000026424	Gpr37l1	chr1:135167680-135167681	human	NA	NA
ENSMUSG00000028790	Khdrbs1	chr4:129742302-129742303	mouse	B2_Mm2_chr4:129789355-129789375	0.038412
ENSMUSG00000026426	Arl8a	chr1:135146823-135146824	human	NA	NA
ENSMUSG00000026430	Rassf5	chr1:131245257-131245258	human	NA	NA
ENSMUSG00000026433	Rab29	chr1:131867223-131867224	mouse	NA	NA
ENSMUSG00000026435	Slc45a3	chr1:131962966-131962967	mouse	NA	NA
ENSMUSG00000026437	Cdk18	chr1:132139683-132139684	human	NA	NA
ENSMUSG00000026443	Lrrn2	chr1:132880272-132880273	human	NA	NA
ENSMUSG00000026466	Tor1aip1	chr1:156036479-156036480	mouse	NA	NA
ENSMUSG00000026471	Mr1	chr1:155146813-155146814	human	NA	NA
ENSMUSG00000026473	Glul	chr1:153899943-153899944	human	NA	NA
ENSMUSG00000026475	Rgs16	chr1:153740348-153740349	human	NA	NA
ENSMUSG00000026480	Ncf2	chr1:152800193-152800194	human	NA	NA
ENSMUSG00000026482	Rgl1	chr1:152766350-152766351	mouse	NA	NA
ENSMUSG00000026483	Fam129a	chr1:151571185-151571186	human	NA	NA
ENSMUSG00000026495	Efcab2	chr1:178406084-178406085	human	NA	NA
ENSMUSG00000026504	Sdccag8	chr1:176814659-176814660	mouse	NA	NA
ENSMUSG00000026511	Srp9	chr1:182124736-182124737	mouse	NA	NA
ENSMUSG00000035042	Ccl5	chr11:83530517-83530518	mouse	B2_Mm2_chr11:83663111-83663292	0.038349
ENSMUSG00000026159	Agfg1	chr1:82839482-82839483	mouse	B2_Mm2_chr1:82841391-82841570	0.038317
ENSMUSG00000026536	Mnda	chr1:173913045-173913046	mouse	NA	NA
ENSMUSG00000026544	Dusp23	chr1:172632961-172632962	mouse	NA	NA
ENSMUSG00000026546	Cfap45	chr1:172520800-172520801	mouse	NA	NA
ENSMUSG00000026572	Tbx19	chr1:165160772-165160773	human	NA	NA
ENSMUSG00000026579	F5	chr1:164151837-164151838	mouse	NA	NA
ENSMUSG00000026580	Selp	chr1:164115263-164115264	mouse	NA	NA
ENSMUSG00000026581	Sell	chr1:164061981-164061982	shared	NA	NA
ENSMUSG00000026596	Abl2	chr1:156558785-156558786	mouse	NA	NA
ENSMUSG00000026600	Soat1	chr1:156474330-156474331	human	NA	NA
ENSMUSG00000026603	Smyd2	chr1:189922362-189922363	human	NA	NA
ENSMUSG00000026608	Kctd3	chr1:189007840-189007841	mouse	NA	NA
ENSMUSG00000026623	Lpgat1	chr1:191717833-191717834	human	NA	NA
ENSMUSG00000026628	Atf3	chr1:191218038-191218039	shared	NA	NA
ENSMUSG00000026630	Batf3	chr1:191097846-191097847	shared	NA	NA
ENSMUSG00000026637	Traf5	chr1:192092558-192092559	human	NA	NA
ENSMUSG00000019173	Rab5c	chr11:100738214-100738215	mouse	B2_Mm2_chr11:100702548-100702730	0.038276
ENSMUSG00000026663	Atf6	chr1:170867770-170867771	mouse	NA	NA
ENSMUSG00000104897	RP23-331L5.1	chr3:35845341-35845342	mouse	B2_Mm2_chr3:35755834-35756023	0.037895
ENSMUSG00000026670	Uap1	chr1:170174956-170174957	mouse	NA	NA
ENSMUSG00000026672	Optn	chr2:5064050-5064051	human	B2_Mm2_chr2:5012232-5012408	0.047787
ENSMUSG00000026723	Trdmt1	chr2:13544667-13544668	mouse	NA	NA
ENSMUSG00000026727	Rsu1	chr2:13271414-13271415	human	NA	NA
ENSMUSG00000026728	Vim	chr2:13573926-13573927	mouse	NA	NA
ENSMUSG00000026729	RP23-71J17.2	chr1:160077984-160077985	mouse	NA	NA
ENSMUSG00000026750	Psmb7	chr2:38644086-38644087	human	NA	NA
ENSMUSG00000026761	Orc4	chr2:48950276-48950277	mouse	NA	NA
ENSMUSG00000026764	Kif5c	chr2:49619297-49619298	mouse	NA	NA
ENSMUSG00000026766	Mmadhc	chr2:50296800-50296801	mouse	NA	NA
ENSMUSG00000026767	Fam188a	chr2:12419469-12419470	mouse	NA	NA
ENSMUSG00000026768	Itga8	chr2:12301921-12301922	mouse	NA	NA
ENSMUSG00000026770	Il2ra	chr2:11642806-11642807	shared	NA	NA
ENSMUSG00000026773	Pfkfb3	chr2:11554076-11554077	human	NA	NA
ENSMUSG00000026778	Prkcq	chr2:11172107-11172108	mouse	NA	NA
ENSMUSG00000026781	Acbd5	chr2:23068166-23068167	human	NA	NA
ENSMUSG00000026784	Pdss1	chr2:22895521-22895522	shared	NA	NA
ENSMUSG00000044224	Dnajc21	chr15:10470515-10470516	mouse	B2_Mm2_chr15:10487401-10487572	0.037615
ENSMUSG00000026799	Med27	chr2:29346818-29346819	mouse	NA	NA
ENSMUSG00000026806	Ddx31	chr2:28840405-28840406	mouse	NA	NA
ENSMUSG00000026810	Dpm2	chr2:32570857-32570858	mouse	NA	NA
ENSMUSG00000026814	Eng	chr2:32646594-32646595	mouse	NA	NA
ENSMUSG00000026816	Gtf3c5	chr2:28583750-28583751	mouse	NA	NA
ENSMUSG00000026819	Slc25a25	chr2:32451444-32451445	shared	NA	NA
ENSMUSG00000026821	Ralgds	chr2:28513124-28513125	mouse	NA	NA
ENSMUSG00000026826	Nr4a2	chr2:57124002-57124003	mouse	NA	NA
ENSMUSG00000026827	Gpd2	chr2:57237634-57237635	shared	NA	NA
ENSMUSG00000026835	Fcnb	chr2:28084884-28084885	human	NA	NA
ENSMUSG00000026848	Tor1b	chr2:30952958-30952959	mouse	NA	NA
ENSMUSG00000026853	Crat	chr2:30415812-30415813	human	B2_Mm2_chr2:30421637-30421732	0.025886
ENSMUSG00000026864	Hspa5	chr2:34771969-34771970	mouse	NA	NA
ENSMUSG00000026866	Kynu	chr2:43555328-43555329	human	NA	NA
ENSMUSG00000026875	Traf1	chr2:34961771-34961772	shared	NA	NA
ENSMUSG00000026880	Stom	chr2:35336975-35336976	human	NA	NA
ENSMUSG00000026893	Gca	chr2:62664284-62664285	mouse	NA	NA
ENSMUSG00000026896	Ifih1	chr2:62646254-62646255	shared	NA	NA
ENSMUSG00000026914	Psmd14	chr2:61711693-61711694	human	NA	NA
ENSMUSG00000026922	Agpat2	chr2:26604416-26604417	human	NA	NA
ENSMUSG00000026923	Notch1	chr2:26516662-26516663	mouse	NA	NA
ENSMUSG00000026933	Camsap1	chr2:25983281-25983282	mouse	NA	NA
ENSMUSG00000026942	Traf2	chr2:25546939-25546940	shared	NA	NA
ENSMUSG00000026946	Nmi	chr2:51973493-51973494	shared	NA	NA
ENSMUSG00000026955	Sapcd2	chr2:25372320-25372321	human	B2_Mm2_chr2:25358075-25358135	0.040866
ENSMUSG00000026956	Uap1l1	chr2:25365681-25365682	human	B2_Mm2_chr2:25358075-25358135	0.055495
ENSMUSG00000026970	Rbms1	chr2:60963191-60963192	mouse	NA	NA
ENSMUSG00000026981	Il1rn	chr2:24336852-24336853	shared	NA	NA
ENSMUSG00000026987	Baz2b	chr2:60209838-60209839	mouse	NA	NA
ENSMUSG00000026994	Galnt3	chr2:66124993-66124994	human	NA	NA
ENSMUSG00000027009	Itga4	chr2:79255425-79255426	mouse	NA	NA
ENSMUSG00000027010	Slc25a12	chr2:71367748-71367749	mouse	NA	NA
ENSMUSG00000027012	Dync1i2	chr2:71211705-71211706	mouse	NA	NA
ENSMUSG00000027030	Stk39	chr2:68472267-68472268	mouse	NA	NA
ENSMUSG00000027035	Cers6	chr2:68861440-68861441	mouse	NA	NA
ENSMUSG00000027074	Slc43a3	chr2:84936578-84936579	shared	NA	NA
ENSMUSG00000027076	Timm10	chr2:84826996-84826997	mouse	NA	NA
ENSMUSG00000027077	Smtnl1	chr2:84822651-84822652	human	NA	NA
ENSMUSG00000027078	Ube2l6	chr2:84798827-84798828	shared	NA	NA
ENSMUSG00000027079	Clp1	chr2:84727349-84727350	mouse	NA	NA
ENSMUSG00000027087	Itgav	chr2:83724396-83724397	mouse	NA	NA
ENSMUSG00000027099	Mtx2	chr2:74825802-74825803	human	NA	NA
ENSMUSG00000027133	Nop10	chr2:112261925-112261926	human	NA	NA
ENSMUSG00000027171	Prrg4	chr2:104849875-104849876	shared	B2_Mm2_chr2:104840875-104841054	0.036407
ENSMUSG00000027175	Tcp11l1	chr2:104712168-104712169	mouse	NA	NA
ENSMUSG00000027177	Hipk3	chr2:104494445-104494446	mouse	NA	NA
ENSMUSG00000027184	Caprin1	chr2:103797648-103797649	mouse	NA	NA
ENSMUSG00000027199	Gatm	chr2:122611302-122611303	mouse	NA	NA
ENSMUSG00000027204	Fbn1	chr2:125507992-125507993	mouse	NA	NA
ENSMUSG00000027227	Sord	chr2:122234748-122234749	mouse	NA	NA
ENSMUSG00000027239	Mdk	chr2:91932296-91932297	human	NA	NA
ENSMUSG00000027245	Hypk	chr2:121453289-121453290	human	NA	NA
ENSMUSG00000027246	Ell3	chr2:121444277-121444278	human	NA	NA
ENSMUSG00000027248	Pdia3	chr2:121413774-121413775	human	NA	NA
ENSMUSG00000027253	Lrp4	chr2:91457510-91457511	human	NA	NA
ENSMUSG00000027270	Lamp5	chr2:136052238-136052239	human	NA	NA
ENSMUSG00000027276	Jag1	chr2:137116643-137116644	human	NA	NA
ENSMUSG00000034330	Plcg2	chr8:117498290-117498291	mouse	B2_Mm2_chr8:117476368-117476426	0.037159
ENSMUSG00000091896	Ube2d2a	chr18:35771558-35771559	mouse	B2_Mm2_chr18:35709238-35709374	0.037054
ENSMUSG00000027296	Itpka	chr2:119742336-119742337	mouse	NA	NA
ENSMUSG00000027316	Gfra4	chr2:131043087-131043088	mouse	NA	NA
ENSMUSG00000027323	Rad51	chr2:119112792-119112793	mouse	NA	NA
ENSMUSG00000027340	Slc23a2	chr2:132145107-132145108	mouse	NA	NA
ENSMUSG00000027342	Pcna	chr2:132253313-132253314	human	NA	NA
ENSMUSG00000027346	Gpcpd1	chr2:132587728-132587729	human	NA	NA
ENSMUSG00000027347	Rasgrp1	chr2:117343000-117343001	shared	NA	NA
ENSMUSG00000027349	Fam98b	chr2:117249738-117249739	mouse	NA	NA
ENSMUSG00000027351	Spred1	chr2:117121373-117121374	mouse	NA	NA
ENSMUSG00000027360	Hdc	chr2:126619298-126619299	mouse	NA	NA
ENSMUSG00000027361	Gabpb1	chr2:126676336-126676337	mouse	NA	NA
ENSMUSG00000027366	Sppl2a	chr2:126933234-126933235	shared	NA	NA
ENSMUSG00000027368	Dusp2	chr2:127336158-127336159	shared	NA	NA
ENSMUSG00000027384	Ndufaf5	chr2:140170648-140170649	mouse	NA	NA
ENSMUSG00000027397	Slc20a1	chr2:129198763-129198764	human	NA	NA
ENSMUSG00000027398	Il1b	chr2:129371138-129371139	human	NA	NA
ENSMUSG00000027399	Il1a	chr2:129309971-129309972	human	NA	NA
ENSMUSG00000027400	Pdyn	chr2:129699843-129699844	mouse	NA	NA
ENSMUSG00000027422	Rrbp1	chr2:144011262-144011263	mouse	NA	NA
ENSMUSG00000027424	Mgme1	chr2:144270662-144270663	human	NA	NA
ENSMUSG00000072919	Noxred1	chr12:87238731-87238732	mouse	B2_Mm2_chr12:87406808-87406992	0.036066
ENSMUSG00000027429	Sec23b	chr2:144556228-144556229	mouse	NA	NA
ENSMUSG00000027452	Acss1	chr2:150668499-150668500	human	NA	NA
ENSMUSG00000027463	Slc52a3	chr2:151996510-151996511	mouse	NA	NA
ENSMUSG00000027466	Rbck1	chr2:152332652-152332653	shared	NA	NA
ENSMUSG00000027475	Kif3b	chr2:153291412-153291413	mouse	NA	NA
ENSMUSG00000027508	Pag1	chr3:9833678-9833679	human	NA	NA
ENSMUSG00000027510	Rbm38	chr2:173020497-173020498	human	NA	NA
ENSMUSG00000027514	Zbp1	chr2:173218922-173218923	mouse	NA	NA
ENSMUSG00000027519	Rab22a	chr2:173659759-173659760	mouse	NA	NA
ENSMUSG00000027531	Impa1	chr3:10331438-10331439	human	NA	NA
ENSMUSG00000027540	Ptpn1	chr2:167932056-167932057	human	NA	NA
ENSMUSG00000027550	Lrrcc1	chr3:14533787-14533788	human	NA	NA
ENSMUSG00000027560	Dok5	chr2:170731806-170731807	human	NA	NA
ENSMUSG00000027566	Psma7	chr2:180042432-180042433	shared	NA	NA
ENSMUSG00000027570	Col9a3	chr2:180597789-180597790	mouse	NA	NA
ENSMUSG00000027580	Helz2	chr2:181242026-181242027	shared	NA	NA
ENSMUSG00000027593	Raly	chr2:154791095-154791096	mouse	NA	NA
ENSMUSG00000027611	Procr	chr2:155751116-155751117	shared	NA	NA
ENSMUSG00000027613	Eif6	chr2:155826924-155826925	mouse	NA	NA
ENSMUSG00000027615	Hps3	chr3:20035314-20035315	human	B2_Mm2_chr3:20076795-20076959	0.013395
ENSMUSG00000027628	Aar2	chr2:156547583-156547584	mouse	NA	NA
ENSMUSG00000027636	Sla2	chr2:156887191-156887192	human	NA	NA
ENSMUSG00000029407	Uso1	chr5:92137937-92137938	mouse	B2_Mm2_chr5:92107216-92107402	0.0359
ENSMUSG00000091408	RP23-100O18.2	chr6:136487185-136487186	mouse	B2_Mm2_chr6:136483843-136484025	0.035103
ENSMUSG00000027646	Src	chr2:157418443-157418444	human	NA	NA
ENSMUSG00000027649	Ctnnbl1	chr2:157737400-157737401	human	NA	NA
ENSMUSG00000027651	Rprd1b	chr2:158028496-158028497	mouse	NA	NA
ENSMUSG00000027660	Skil	chr3:31095057-31095058	mouse	NA	NA
ENSMUSG00000024824	Rad9a	chr19:4201602-4201603	mouse	B2_Mm2_chr19:4203317-4203470	0.034936
ENSMUSG00000037826	Ppm1k	chr6:57535467-57535468	mouse	B2_Mm2_chr6:57581896-57581921	0.03487
ENSMUSG00000027708	Dcun1d1	chr3:35937444-35937445	mouse	NA	NA
ENSMUSG00000027722	Spata5	chr3:37419895-37419896	mouse	NA	NA
ENSMUSG00000027746	Ufm1	chr3:53863829-53863830	mouse	NA	NA
ENSMUSG00000027762	Sucnr1	chr3:60081868-60081869	human	NA	NA
ENSMUSG00000027774	Gfm1	chr3:67430095-67430096	human	NA	NA
ENSMUSG00000027775	Mfsd1	chr3:67582740-67582741	mouse	NA	NA
ENSMUSG00000027776	Il12a	chr3:68690643-68690644	human	NA	NA
ENSMUSG00000027782	Kpna4	chr3:69127112-69127113	mouse	NA	NA
ENSMUSG00000027793	Ccna1	chr3:55055500-55055501	human	NA	NA
ENSMUSG00000027822	Slc33a1	chr3:63964767-63964768	mouse	NA	NA
ENSMUSG00000027827	Kcnab1	chr3:65109383-65109384	mouse	NA	NA
ENSMUSG00000027828	Ssr3	chr3:65392622-65392623	mouse	NA	NA
ENSMUSG00000027829	Ccnl1	chr3:65958248-65958249	mouse	NA	NA
ENSMUSG00000027834	Serpini1	chr3:75557546-75557547	human	NA	NA
ENSMUSG00000027835	Pdcd10	chr3:75556855-75556856	mouse	NA	NA
ENSMUSG00000027843	Ptpn22	chr3:103859794-103859795	human	NA	NA
ENSMUSG00000027848	Olfml3	chr3:103738000-103738001	human	NA	NA
ENSMUSG00000027852	Nras	chr3:103058284-103058285	shared	NA	NA
ENSMUSG00000027878	Notch2	chr3:98013526-98013527	human	NA	NA
ENSMUSG00000027879	Sec22b	chr3:97901189-97901190	shared	NA	NA
ENSMUSG00000027882	Stxbp3	chr3:108840525-108840526	mouse	NA	NA
ENSMUSG00000090812	Samd15	chr12:87199722-87199723	mouse	B2_Mm2_chr12:87406808-87406992	0.034577
ENSMUSG00000027895	Kcnc4	chr3:107459551-107459552	human	NA	NA
ENSMUSG00000027901	Dennd2d	chr3:106482404-106482405	human	NA	NA
ENSMUSG00000027907	S100a11	chr3:93520487-93520488	human	NA	NA
ENSMUSG00000027932	Slc27a3	chr3:90389937-90389938	human	NA	NA
ENSMUSG00000060992	Copz1	chr15:103272713-103272714	mouse	B2_Mm2_chr15:103279844-103280011	0.034551
ENSMUSG00000027940	Tpm3	chr3:90072648-90072649	mouse	NA	NA
ENSMUSG00000027944	Hax1	chr3:89998779-89998780	human	NA	NA
ENSMUSG00000027947	Il6ra	chr3:89913195-89913196	human	NA	NA
ENSMUSG00000027950	Chrnb2	chr3:89764631-89764632	mouse	NA	NA
ENSMUSG00000027951	Adar	chr3:89715021-89715022	shared	NA	NA
ENSMUSG00000027952	Pmvk	chr3:89454540-89454541	mouse	NA	NA
ENSMUSG00000027953	Slc50a1	chr3:89270569-89270570	human	NA	NA
ENSMUSG00000027956	Tmem144	chr3:79852772-79852773	human	NA	NA
ENSMUSG00000027962	Vcam1	chr3:116129687-116129688	shared	NA	NA
ENSMUSG00000027994	Mcub	chr3:129970205-129970206	mouse	NA	NA
ENSMUSG00000027995	Tlr2	chr3:83841766-83841767	human	NA	NA
ENSMUSG00000028015	Ctso	chr3:81932600-81932601	human	NA	NA
ENSMUSG00000028019	Pdgfc	chr3:81036415-81036416	mouse	NA	NA
ENSMUSG00000028028	Alpk1	chr3:127780526-127780527	shared	NA	NA
ENSMUSG00000028031	Dkk2	chr3:132085291-132085292	human	NA	NA
ENSMUSG00000028037	Ifi44	chr3:151749959-151749960	mouse	NA	NA
ENSMUSG00000028042	Zbtb7b	chr3:89394775-89394776	mouse	NA	NA
ENSMUSG00000028044	Cks1b	chr3:89418382-89418383	human	NA	NA
ENSMUSG00000028059	Arhgef2	chr3:88605965-88605966	mouse	NA	NA
ENSMUSG00000028060	2810403A07Rik	chr3:88685802-88685803	mouse	NA	NA
ENSMUSG00000028064	Sema4a	chr3:88461181-88461182	shared	NA	NA
ENSMUSG00000028069	Gpatch4	chr3:88043107-88043108	mouse	NA	NA
ENSMUSG00000028081	Rps3a1	chr3:86142701-86142702	mouse	NA	NA
ENSMUSG00000028098	Rnf115	chr3:96727663-96727664	shared	NA	NA
ENSMUSG00000028099	Polr3c	chr3:96727627-96727628	mouse	NA	NA
ENSMUSG00000028107	Tars2	chr3:95760205-95760206	mouse	NA	NA
ENSMUSG00000028108	Ecm1	chr3:95739568-95739569	mouse	NA	NA
ENSMUSG00000028109	Hormad1	chr3:95559676-95559677	human	B2_Mm2_chr3:95498155-95498329	0.025282
ENSMUSG00000028121	Bcar3	chr3:122294135-122294136	human	NA	NA
ENSMUSG00000028128	F3	chr3:121723536-121723537	shared	NA	NA
ENSMUSG00000028136	Snx27	chr3:94582715-94582716	human	NA	NA
ENSMUSG00000028149	Rap1gds1	chr3:139075200-139075201	mouse	NA	NA
ENSMUSG00000028158	Mttp	chr3:138144967-138144968	mouse	NA	NA
ENSMUSG00000028159	Dapp1	chr3:137981544-137981545	human	NA	NA
ENSMUSG00000028163	Nfkb1	chr3:135691546-135691547	shared	NA	NA
ENSMUSG00000028165	Cisd2	chr3:135423924-135423925	shared	NA	NA
ENSMUSG00000028214	Gem	chr4:11704456-11704457	mouse	NA	NA
ENSMUSG00000028218	Fam92a	chr4:12172014-12172015	human	NA	NA
ENSMUSG00000028223	Decr1	chr4:15945506-15945507	human	NA	NA
ENSMUSG00000028224	Nbn	chr4:15957924-15957925	human	NA	NA
ENSMUSG00000028228	Cpne3	chr4:19570107-19570108	mouse	NA	NA
ENSMUSG00000028232	Tmem68	chr4:3574852-3574853	mouse	NA	NA
ENSMUSG00000028233	Tgs1	chr4:3574874-3574875	mouse	NA	NA
ENSMUSG00000028245	Nsmaf	chr4:6454270-6454271	mouse	NA	NA
ENSMUSG00000028266	Lmo4	chr3:144205219-144205220	mouse	NA	NA
ENSMUSG00000028268	Gbp3	chr3:142560025-142560026	mouse	NA	NA
ENSMUSG00000028270	Gbp2	chr3:142620601-142620602	mouse	NA	NA
ENSMUSG00000028271	Gtf2b	chr3:142765044-142765045	human	NA	NA
ENSMUSG00000028274	Rngtt	chr4:33310310-33310311	mouse	NA	NA
ENSMUSG00000028277	Ube2j1	chr4:33031415-33031416	human	B2_Mm2_chr4:33073156-33073235	0.016056
ENSMUSG00000028278	Rragd	chr4:32983036-32983037	human	B2_Mm2_chr4:33073156-33073235	0.010192
ENSMUSG00000028291	Akirin2	chr4:34550936-34550937	human	NA	NA
ENSMUSG00000028334	Nans	chr4:46489247-46489248	human	NA	NA
ENSMUSG00000028337	Coro2a	chr4:46602201-46602202	mouse	NA	NA
ENSMUSG00000028341	Nr4a3	chr4:48045152-48045153	human	NA	NA
ENSMUSG00000028343	Erp44	chr4:48279557-48279558	mouse	NA	NA
ENSMUSG00000028358	Zfp618	chr4:62965572-62965573	human	B2_Mm2_chr4:62407240-62407421	0.019657
ENSMUSG00000028367	Txn1	chr4:57956410-57956411	shared	NA	NA
ENSMUSG00000028381	Ugcg	chr4:59189256-59189257	shared	NA	NA
ENSMUSG00000028403	Zdhhc21	chr4:82859957-82859958	mouse	NA	NA
ENSMUSG00000028416	Bag1	chr4:40948293-40948294	human	NA	NA
ENSMUSG00000028419	Chmp5	chr4:40948406-40948407	shared	NA	NA
ENSMUSG00000028420	Tmem38b	chr4:53826044-53826045	human	NA	NA
ENSMUSG00000028423	Nfx1	chr4:40970905-40970906	human	NA	NA
ENSMUSG00000028459	Cd72	chr4:43454627-43454628	human	NA	NA
ENSMUSG00000028465	Tln1	chr4:43562690-43562691	mouse	NA	NA
ENSMUSG00000028466	Creb3	chr4:43562331-43562332	mouse	NA	NA
ENSMUSG00000028479	Gne	chr4:44084176-44084177	human	NA	NA
ENSMUSG00000028480	Glipr2	chr4:43957400-43957401	shared	NA	NA
ENSMUSG00000028484	Psip1	chr4:83486458-83486459	mouse	NA	NA
ENSMUSG00000028496	Mllt3	chr4:88033363-88033364	mouse	NA	NA
ENSMUSG00000028521	Slc35d1	chr4:103215163-103215164	mouse	NA	NA
ENSMUSG00000028525	Pde4b	chr4:102087542-102087543	shared	NA	NA
ENSMUSG00000028527	Ak4	chr4:101419276-101419277	mouse	NA	NA
ENSMUSG00000028546	Elavl4	chr4:110351908-110351909	human	NA	NA
ENSMUSG00000028583	Pdpn	chr4:143299563-143299564	mouse	NA	NA
ENSMUSG00000028609	Magoh	chr4:107879754-107879755	human	NA	NA
ENSMUSG00000028613	Lrp8	chr4:107802260-107802261	human	NA	NA
ENSMUSG00000028617	Lrrc42	chr4:107253531-107253532	shared	NA	NA
ENSMUSG00000028618	Tmem59	chr4:107178398-107178399	mouse	NA	NA
ENSMUSG00000028619	Tceanc2	chr4:107179115-107179116	mouse	NA	NA
ENSMUSG00000028626	Col9a2	chr4:121039384-121039385	human	B2_Mm2_chr4:121031520-121031705	0.011269
ENSMUSG00000028634	Hivep3	chr4:119733783-119733784	shared	NA	NA
ENSMUSG00000028643	Svbp	chr4:119195305-119195306	mouse	NA	NA
ENSMUSG00000028645	Slc2a1	chr4:119108710-119108711	shared	NA	NA
ENSMUSG00000028646	Rragc	chr4:123917445-123917446	human	NA	NA
ENSMUSG00000028654	Mycl	chr4:122995651-122995652	shared	B2_Mm2_chr4:122860243-122860391	0.011979
ENSMUSG00000028655	Mfsd2a	chr4:122961187-122961188	human	B2_Mm2_chr4:122860243-122860391	0.017552
ENSMUSG00000024339	Tap2	chr17:34203526-34203527	mouse	B2_Mm2_chr17:34206060-34206220	0.034544
ENSMUSG00000029319	Coq2	chr5:100675139-100675140	mouse	B2_Mm2_chr5:100663941-100664096	0.034095
ENSMUSG00000028664	Ephb2	chr4:136835987-136835988	mouse	NA	NA
ENSMUSG00000028680	Plk3	chr4:117133962-117133963	human	B2_Mm2_chr4:117139371-117139557	0.017943
ENSMUSG00000028690	Mmachc	chr4:116708405-116708406	human	NA	NA
ENSMUSG00000028691	Prdx1	chr4:116685543-116685544	human	B2_Mm2_chr4:116660012-116660183	0.012557
ENSMUSG00000028692	Akr1a1	chr4:116651679-116651680	human	B2_Mm2_chr4:116660012-116660183	0.017879
ENSMUSG00000028706	Nsun4	chr4:116053875-116053876	mouse	NA	NA
ENSMUSG00000028709	Mob3c	chr4:115828091-115828092	shared	NA	NA
ENSMUSG00000028719	Cmpk1	chr4:114987240-114987241	mouse	NA	NA
ENSMUSG00000028758	Kif17	chr4:138250434-138250435	human	NA	NA
ENSMUSG00000028771	Ptpn12	chr5:21055910-21055911	human	NA	NA
ENSMUSG00000067219	Nipal1	chr5:72647794-72647795	mouse	B2_Mm2_chr5:72551490-72551670	0.033979
ENSMUSG00000028789	Azin2	chr4:128962441-128962442	mouse	NA	NA
ENSMUSG00000041849	Card6	chr15:5108538-5108539	mouse	B2_Mm2_chr15:5106531-5106716	0.033899
ENSMUSG00000028792	Ak2	chr4:128991957-128991958	shared	NA	NA
ENSMUSG00000028793	Rnf19b	chr4:129058270-129058271	shared	NA	NA
ENSMUSG00000028796	Phc2	chr4:128654701-128654702	mouse	NA	NA
ENSMUSG00000028800	Hdac1	chr4:129542712-129542713	mouse	NA	NA
ENSMUSG00000028811	Yars	chr4:129189759-129189760	shared	NA	NA
ENSMUSG00000028821	Syf2	chr4:134930897-134930898	mouse	NA	NA
ENSMUSG00000028837	Psmb2	chr4:126677629-126677630	shared	NA	NA
ENSMUSG00000028849	Map7d1	chr4:126256342-126256343	mouse	NA	NA
ENSMUSG00000028874	Fgr	chr4:132974094-132974095	human	B2_Mm2_chr4:132971718-132971862	0.07358
ENSMUSG00000028879	Stx12	chr4:132884508-132884509	mouse	NA	NA
ENSMUSG00000028885	Smpdl3b	chr4:132757251-132757252	mouse	NA	NA
ENSMUSG00000028889	Yrdc	chr4:124850678-124850679	shared	NA	NA
ENSMUSG00000028890	Mtf1	chr4:124802103-124802104	shared	NA	NA
ENSMUSG00000028894	Inpp5b	chr4:124741849-124741850	mouse	NA	NA
ENSMUSG00000028902	Sf3a3	chr4:124714775-124714776	mouse	NA	NA
ENSMUSG00000028906	Epb41	chr4:132075320-132075321	human	B2_Mm2_chr4:132007673-132007839	0.032932
ENSMUSG00000025332	Kdm5c	chrX:152233019-152233020	mouse	B2_Mm2_chrX:152241180-152241349	0.033147
ENSMUSG00000028923	Necap2	chr4:141078356-141078357	mouse	NA	NA
ENSMUSG00000028926	Cdk14	chr5:5420311-5420312	human	NA	NA
ENSMUSG00000028927	Padi2	chr4:140906343-140906344	human	NA	NA
ENSMUSG00000028932	Psmc2	chr5:21785282-21785283	human	NA	NA
ENSMUSG00000028937	Acot7	chr4:152178133-152178134	mouse	NA	NA
ENSMUSG00000028945	Rheb	chr5:24842623-24842624	human	NA	NA
ENSMUSG00000028949	Smarcd3	chr5:24624410-24624411	human	B2_Mm2_chr5:24578463-24578638	0.012224
ENSMUSG00000028954	Nub1	chr5:24685531-24685532	shared	NA	NA
ENSMUSG00000028957	Per3	chr4:151044664-151044665	human	B2_Mm2_chr4:150549067-150549219	0.010846
ENSMUSG00000028965	Tnfrsf9	chr4:150914561-150914562	human	B2_Mm2_chr4:150549067-150549219	0.023589
ENSMUSG00000028967	Errfi1	chr4:150853918-150853919	human	B2_Mm2_chr4:150549067-150549219	0.014442
ENSMUSG00000028982	Slc25a33	chr4:149774276-149774277	human	B2_Mm2_chr4:149763333-149763513	0.030734
ENSMUSG00000029003	Mad2l2	chr4:148130383-148130384	mouse	NA	NA
ENSMUSG00000029007	Agtrap	chr4:148088030-148088031	human	NA	NA
ENSMUSG00000029009	Mthfr	chr4:148039076-148039077	mouse	NA	NA
ENSMUSG00000029016	Clcn6	chr4:148038820-148038821	mouse	NA	NA
ENSMUSG00000029017	Pmpcb	chr5:21737140-21737141	mouse	NA	NA
ENSMUSG00000029022	Miip	chr4:147868815-147868816	human	NA	NA
ENSMUSG00000082292	RP24-499A8.3	chr11:58187738-58187739	mouse	B2_Mm2_chr11:58191280-58191441	0.033107
ENSMUSG00000040276	Pacsin1	chr17:27655508-27655509	mouse	B2_Mm2_chr17:27826636-27826802	0.033064
ENSMUSG00000029063	Nadk	chr4:155562377-155562378	human	NA	NA
ENSMUSG00000029064	Gnb1	chr4:155491360-155491361	mouse	NA	NA
ENSMUSG00000029068	Ccnl2	chr4:155812488-155812489	mouse	NA	NA
ENSMUSG00000029075	Tnfrsf4	chr4:156013842-156013843	human	NA	NA
ENSMUSG00000029082	Bst1	chr5:43818884-43818885	shared	NA	NA
ENSMUSG00000029084	Cd38	chr5:43868552-43868553	shared	NA	NA
ENSMUSG00000029104	Htt	chr5:34761739-34761740	mouse	NA	NA
ENSMUSG00000029135	Fosl2	chr5:32135800-32135801	human	NA	NA
ENSMUSG00000029147	Ppm1g	chr5:31220686-31220687	mouse	NA	NA
ENSMUSG00000029148	Nrbp1	chr5:31240863-31240864	mouse	NA	NA
ENSMUSG00000029152	Ociad1	chr5:73292783-73292784	mouse	NA	NA
ENSMUSG00000029156	Sgcb	chr5:73647789-73647790	mouse	NA	NA
ENSMUSG00000029167	Ppargc1a	chr5:51567725-51567726	mouse	NA	NA
ENSMUSG00000063273	Naa15	chr3:51415147-51415148	mouse	B2_Mm2_chr3:51421924-51422114	0.032996
ENSMUSG00000029189	Sel1l3	chr5:53213926-53213927	human	NA	NA
ENSMUSG00000029502	Golga3	chr5:110176700-110176701	mouse	B2_Mm2_chr5:110231636-110231742	0.032381
ENSMUSG00000029198	Grpel1	chr5:36464997-36464998	human	B2_Mm2_chr5:36750468-36750585	0.012022
ENSMUSG00000029204	Rhoh	chr5:65861212-65861213	shared	NA	NA
ENSMUSG00000029231	Pdgfra	chr5:75152291-75152292	human	NA	NA
ENSMUSG00000029233	Srd5a3	chr5:76140270-76140271	mouse	NA	NA
ENSMUSG00000029234	Tmem165	chr5:76183879-76183880	human	NA	NA
ENSMUSG00000035355	Kcnh4	chr11:100759941-100759942	mouse	B2_Mm2_chr11:100702548-100702730	0.030975
ENSMUSG00000029254	Stap1	chr5:86071745-86071746	human	NA	NA
ENSMUSG00000029265	Dr1	chr5:108268896-108268897	mouse	NA	NA
ENSMUSG00000029270	Fam69a	chr5:107987084-107987085	human	NA	NA
ENSMUSG00000029279	Brdt	chr5:107331158-107331159	mouse	NA	NA
ENSMUSG00000029287	Tgfbr3	chr5:107289628-107289629	mouse	NA	NA
ENSMUSG00000029291	Rufy3	chr5:88565039-88565040	shared	NA	NA
ENSMUSG00000029298	Gbp9	chr5:105139538-105139539	mouse	NA	NA
ENSMUSG00000029299	Abcg3	chr5:104982717-104982718	mouse	NA	NA
ENSMUSG00000029310	Nudt9	chr5:104046305-104046306	mouse	NA	NA
ENSMUSG00000029313	Aff1	chr5:103692373-103692374	mouse	NA	NA
ENSMUSG00000029314	Agpat9	chr5:100845712-100845713	shared	NA	NA
ENSMUSG00000000791	Il12rb1	chr8:70808448-70808449	mouse	B2_Mm2_chr8:70811770-70811946	0.030896
ENSMUSG00000029322	Plac8	chr5:100572244-100572245	shared	B2_Mm2_chr5:100663941-100664096	0.031509
ENSMUSG00000029330	Cds1	chr5:101765129-101765130	shared	NA	NA
ENSMUSG00000029344	Tpst2	chr5:112276690-112276691	mouse	NA	NA
ENSMUSG00000029348	Asphd2	chr5:112394865-112394866	human	NA	NA
ENSMUSG00000029364	Wsb2	chr5:117357303-117357304	human	NA	NA
ENSMUSG00000029366	Dck	chr5:88764995-88764996	mouse	NA	NA
ENSMUSG00000029401	Rilpl2	chr5:124478365-124478366	human	NA	NA
ENSMUSG00000022257	Laptm4b	chr15:34238027-34238028	mouse	B2_Mm2_chr15:34097135-34097307	0.030137
ENSMUSG00000085401	Slc39a1-ps	chr2:30159397-30159398	mouse	B2_Mm2_chr2:30128910-30129091	0.029549
ENSMUSG00000033933	Vhl	chr6:113623958-113623959	mouse	B2_Mm2_chr6:113663382-113663419	0.029428
ENSMUSG00000054855	Rnd1	chr15:98677460-98677461	mouse	B2_Mm2_chr15:98684783-98684972	0.029059
ENSMUSG00000031232	Magt1	chrX:106011905-106011906	mouse	B2_Mm2_chrX:106013329-106013508	0.028825
ENSMUSG00000029416	Slc15a4	chr5:127632896-127632897	human	NA	NA
ENSMUSG00000029417	Cxcl9	chr5:92328078-92328079	shared	B2_Mm2_chr5:92279606-92279780	0.022352
ENSMUSG00000029427	Zcchc8	chr5:123721099-123721100	mouse	NA	NA
ENSMUSG00000029428	Stx2	chr5:129008573-129008574	mouse	NA	NA
ENSMUSG00000029468	P2rx7	chr5:122643910-122643911	human	NA	NA
ENSMUSG00000029474	Rnf34	chr5:122850047-122850048	mouse	NA	NA
ENSMUSG00000029484	Anxa3	chr5:96793338-96793339	mouse	NA	NA
ENSMUSG00000029490	Mfsd7a	chr5:108448890-108448891	human	NA	NA
ENSMUSG00000022586	Ly6i	chr15:74983429-74983430	mouse	B2_Mm2_chr15:74975468-74975603	0.028587
ENSMUSG00000056116	H2-T22	chr17:36042746-36042747	mouse	B2_Mm2_chr17:35999636-35999726	0.028558
ENSMUSG00000030082	Sec61a1	chr6:88518904-88518905	mouse	B2_Mm2_chr6:88904510-88904676	0.028273
ENSMUSG00000029505	Ep400	chr5:110770716-110770717	mouse	NA	NA
ENSMUSG00000029534	St7	chr6:17692932-17692933	mouse	NA	NA
ENSMUSG00000029553	Tfec	chr6:16898440-16898441	shared	NA	NA
ENSMUSG00000029560	Snx8	chr5:140389261-140389262	human	B2_Mm2_chr5:140386315-140386338	0.028741
ENSMUSG00000029561	Oasl2	chr5:114896935-114896936	mouse	NA	NA
ENSMUSG00000029569	Tmem168	chr6:13608099-13608100	mouse	NA	NA
ENSMUSG00000029570	Lfng	chr5:140607319-140607320	mouse	NA	NA
ENSMUSG00000072572	Slc39a2	chr14:51892888-51892889	mouse	B2_Mm2_chr14:51883753-51883928	0.0281
ENSMUSG00000029594	Rbm19	chr5:120116464-120116465	human	NA	NA
ENSMUSG00000029596	Sdsl	chr5:120472809-120472810	human	B2_Mm2_chr5:120517511-120517544	0.024874
ENSMUSG00000021866	Anxa11	chr14:25842155-25842156	mouse	B2_Mm2_chr14:25830167-25830356	0.028001
ENSMUSG00000029605	Oas1b	chr5:120812634-120812635	mouse	NA	NA
ENSMUSG00000064302	Clasp1	chr1:118389057-118389058	mouse	B2_Mm2_chr1:118311715-118311901	0.027987
ENSMUSG00000029616	Erp29	chr5:121452505-121452506	human	B2_Mm2_chr5:121389850-121390039	0.021433
ENSMUSG00000116838	RP24-75N14.5	chr17:3314184-3314185	mouse	B2_Mm2_chr17:6173450-6173567	0.027976
ENSMUSG00000029635	Cdk8	chr5:146231229-146231230	mouse	NA	NA
ENSMUSG00000029640	Usp12	chr5:146795005-146795006	mouse	NA	NA
ENSMUSG00000029648	Flt1	chr5:147726010-147726011	shared	NA	NA
ENSMUSG00000029649	Pomp	chr5:147860460-147860461	shared	B2_Mm2_chr5:147896466-147896641	0.01155
ENSMUSG00000029655	N4bp2l2	chr5:150666182-150666183	mouse	NA	NA
ENSMUSG00000029657	Hsph1	chr5:149636375-149636376	human	NA	NA
ENSMUSG00000029673	Auts2	chr5:132543343-132543344	human	NA	NA
ENSMUSG00000029681	Bcl7b	chr5:135168282-135168283	human	NA	NA
ENSMUSG00000029686	Cul1	chr6:47453397-47453398	human	NA	NA
ENSMUSG00000029701	Rbm28	chr6:29165005-29165006	mouse	NA	NA
ENSMUSG00000029713	Gnb2	chr5:137533509-137533510	mouse	NA	NA
ENSMUSG00000029752	Asns	chr6:7693253-7693254	human	NA	NA
ENSMUSG00000029771	Irf5	chr6:29526624-29526625	mouse	NA	NA
ENSMUSG00000029772	Ahcyl2	chr6:29768010-29768011	mouse	NA	NA
ENSMUSG00000029776	Hibadh	chr6:52640388-52640389	mouse	NA	NA
ENSMUSG00000029777	Gars	chr6:55038006-55038007	mouse	NA	NA
ENSMUSG00000029780	Nt5c3	chr6:56923931-56923932	shared	B2_Mm2_chr6:57581896-57581921	0.012529
ENSMUSG00000029787	Avl9	chr6:56714898-56714899	mouse	NA	NA
ENSMUSG00000032468	Armc8	chr9:99568898-99568899	mouse	B2_Mm2_chr9:99089606-99089794	0.027936
ENSMUSG00000029814	Igf2bp3	chr6:49214956-49214957	human	B2_Mm2_chr6:49073355-49073520	0.032832
ENSMUSG00000022635	Zcrb1	chr15:93398333-93398334	mouse	B2_Mm2_chr15:93379354-93379518	0.027438
ENSMUSG00000029821	Dfna5	chr6:50263861-50263862	human	NA	NA
ENSMUSG00000029826	Zc3hav1	chr6:38354602-38354603	mouse	NA	NA
ENSMUSG00000029832	Nfe2l3	chr6:51432669-51432670	human	NA	NA
ENSMUSG00000029844	Hoxa1	chr6:52158316-52158317	human	NA	NA
ENSMUSG00000036167	Pphln1	chr15:93398349-93398350	mouse	B2_Mm2_chr15:93379354-93379518	0.027438
ENSMUSG00000019471	Cdc37	chr9:21149981-21149982	mouse	B2_Mm2_chr9:21137136-21137222	0.027417
ENSMUSG00000047514	Tspyl1	chr10:34282189-34282190	mouse	B2_Mm2_chr10:34209801-34209981	0.027305
ENSMUSG00000034111	Tmed8	chr12:87200453-87200454	mouse	B2_Mm2_chr12:87406808-87406992	0.027123
ENSMUSG00000029866	Kel	chr6:41704338-41704339	human	NA	NA
ENSMUSG00000029915	Clec5a	chr6:40585820-40585821	mouse	NA	NA
ENSMUSG00000059325	Hopx	chr5:77115120-77115121	mouse	B2_Mm2_chr5:77252490-77252664	0.026962
ENSMUSG00000059714	Flot1	chr17:35823229-35823230	mouse	B2_Mm2_chr17:35740217-35740401	0.026812
ENSMUSG00000029994	Anxa4	chr6:86793583-86793584	shared	B2_Mm2_chr6:86773134-86773210	0.109569
ENSMUSG00000030000	Add2	chr6:86028680-86028681	human	B2_Mm2_chr6:86773134-86773210	0.012916
ENSMUSG00000030002	Dusp11	chr6:85961666-85961667	mouse	NA	NA
ENSMUSG00000030019	Fbxl14	chr6:119479667-119479668	mouse	NA	NA
ENSMUSG00000030031	Kbtbd8	chr6:95117239-95117240	shared	B2_Mm2_chr6:95111966-95112108	0.026278
ENSMUSG00000030047	Arhgap25	chr6:87533258-87533259	human	B2_Mm2_chr6:87553091-87553276	0.024142
ENSMUSG00000030055	Rab43	chr6:87812163-87812164	mouse	NA	NA
ENSMUSG00000030068	RP23-133N21.3	chr6:99666796-99666797	mouse	NA	NA
ENSMUSG00000092511	RP24-317H19.10	chr17:34882041-34882042	mouse	B2_Mm2_chr17:34952918-34953069	0.026699
ENSMUSG00000030088	Aldh1l1	chr6:90486426-90486427	mouse	NA	NA
ENSMUSG00000030091	Nup210	chr6:91116828-91116829	human	B2_Mm2_chr6:88904510-88904676	0.011338
ENSMUSG00000030101	Sumf1	chr6:108185581-108185582	mouse	NA	NA
ENSMUSG00000030102	Itpr1	chr6:108213095-108213096	mouse	NA	NA
ENSMUSG00000030103	Bhlhe40	chr6:108660628-108660629	human	NA	NA
ENSMUSG00000030104	Edem1	chr6:108828640-108828641	human	NA	NA
ENSMUSG00000030105	Arl8b	chr6:108783098-108783099	human	NA	NA
ENSMUSG00000030107	Usp18	chr6:121245905-121245906	mouse	NA	NA
ENSMUSG00000030109	Slc6a12	chr6:121343075-121343076	human	NA	NA
ENSMUSG00000030124	Lag3	chr6:124911704-124911705	human	NA	NA
ENSMUSG00000030134	Rasgef1a	chr6:118011437-118011438	human	NA	NA
ENSMUSG00000030142	Clec4e	chr6:123289869-123289870	human	NA	NA
ENSMUSG00000030144	Clec4d	chr6:123262110-123262111	human	NA	NA
ENSMUSG00000030149	Klrk1	chr6:129623863-129623864	mouse	NA	NA
ENSMUSG00000030156	Cd69	chr6:129275435-129275436	shared	NA	NA
ENSMUSG00000030157	Clec2d	chr6:129180614-129180615	mouse	NA	NA
ENSMUSG00000030158	Clec12b	chr6:129385873-129385874	human	NA	NA
ENSMUSG00000030159	Clec1b	chr6:129397296-129397297	human	NA	NA
ENSMUSG00000030187	Klra2	chr6:131247361-131247362	mouse	NA	NA
ENSMUSG00000025492	Ifitm3	chr7:141010769-141010770	mouse	B2_Mm2_chr7:141021963-141022013	0.02658
ENSMUSG00000030199	Etv6	chr6:134035699-134035700	mouse	NA	NA
ENSMUSG00000030200	Bcl2l14	chr6:134396317-134396318	shared	B2_Mm2_chr6:134640561-134640761	0.012719
ENSMUSG00000030203	Dusp16	chr6:134792624-134792625	shared	B2_Mm2_chr6:134640561-134640761	0.042001
ENSMUSG00000030214	Plbd1	chr6:136661927-136661928	human	NA	NA
ENSMUSG00000030220	Arhgdib	chr6:136941898-136941899	mouse	NA	NA
ENSMUSG00000030223	Ptpro	chr6:137252318-137252319	mouse	NA	NA
ENSMUSG00000050737	Ptges	chr2:30929862-30929863	mouse	B2_Mm2_chr2:30934054-30934238	0.026423
ENSMUSG00000030255	Sspn	chr6:145931640-145931641	human	NA	NA
ENSMUSG00000030256	Bhlhe41	chr6:145865557-145865558	human	NA	NA
ENSMUSG00000030269	Mtmr14	chr6:113237842-113237843	shared	NA	NA
ENSMUSG00000030270	Cpne9	chr6:113282306-113282307	human	B2_Mm2_chr6:113296697-113296868	0.017868
ENSMUSG00000030275	Etnk1	chr6:143167220-143167221	mouse	NA	NA
ENSMUSG00000030276	Ttll3	chr6:113389259-113389260	mouse	NA	NA
ENSMUSG00000030283	St8sia1	chr6:142964451-142964452	mouse	NA	NA
ENSMUSG00000030303	Far2	chr6:148047258-148047259	mouse	NA	NA
ENSMUSG00000030306	Tmtc1	chr6:148444388-148444389	human	NA	NA
ENSMUSG00000030339	Ltbr	chr6:125313884-125313885	mouse	NA	NA
ENSMUSG00000039804	Ncoa5	chr2:165034866-165034867	mouse	B2_Mm2_chr2:165027468-165027652	0.026253
ENSMUSG00000030341	Tnfrsf1a	chr6:125349361-125349362	mouse	NA	NA
ENSMUSG00000030347	RP23-222G22.7	chr6:126939961-126939962	mouse	NA	NA
ENSMUSG00000002028	Kmt2a	chr9:44881295-44881296	mouse	B2_Mm2_chr9:44919669-44919853	0.026056
ENSMUSG00000030423	Pop4	chr7:38271422-38271423	mouse	NA	NA
ENSMUSG00000030447	Cyfip1	chr7:55841744-55841745	mouse	NA	NA
ENSMUSG00000030452	Nipa2	chr7:55962475-55962476	mouse	NA	NA
ENSMUSG00000030465	Psd3	chr8:68212026-68212027	mouse	NA	NA
ENSMUSG00000030484	Lypd5	chr7:24349195-24349196	human	NA	NA
ENSMUSG00000037020	Wdr62	chr7:30280418-30280419	mouse	B2_Mm2_chr7:30412448-30412636	0.025719
ENSMUSG00000030545	Pex11a	chr7:79743130-79743131	mouse	NA	NA
ENSMUSG00000030559	Rab38	chr7:88430272-88430273	mouse	NA	NA
ENSMUSG00000030560	Ctsc	chr7:88278084-88278085	shared	NA	NA
ENSMUSG00000030589	Rasgrp4	chr7:29134850-29134851	mouse	NA	NA
ENSMUSG00000030591	Psmd8	chr7:29180700-29180701	human	B2_Mm2_chr7:30412448-30412636	0.011459
ENSMUSG00000030595	Nfkbib	chr7:28767511-28767512	shared	NA	NA
ENSMUSG00000023991	Foxp4	chr17:47924644-47924645	mouse	B2_Mm2_chr17:47900509-47900684	0.025718
ENSMUSG00000030603	Psmc4	chr7:28050100-28050101	mouse	NA	NA
ENSMUSG00000030606	Hapln3	chr7:79131017-79131018	human	NA	NA
ENSMUSG00000030607	Acan	chr7:79053482-79053483	human	NA	NA
ENSMUSG00000030609	Aen	chr7:78895853-78895854	shared	NA	NA
ENSMUSG00000030643	Rab30	chr7:92741602-92741603	mouse	NA	NA
ENSMUSG00000030654	Arl6ip1	chr7:118129661-118129662	mouse	NA	NA
ENSMUSG00000030671	Pde3b	chr7:114415280-114415281	human	NA	NA
ENSMUSG00000030681	Mvp	chr7:127014620-127014621	shared	NA	NA
ENSMUSG00000030691	Fchsd2	chr7:101092862-101092863	mouse	NA	NA
ENSMUSG00000030714	Sgf29	chr7:126649308-126649309	human	B2_Mm2_chr7:126643381-126643547	0.037183
ENSMUSG00000097799	Gm26899	chr2:120532903-120532904	mouse	B2_Mm2_chr2:120575771-120575953	0.025715
ENSMUSG00000030718	Ppme1	chr7:100372306-100372307	mouse	NA	NA
ENSMUSG00000030726	Pold3	chr7:100121564-100121565	mouse	NA	NA
ENSMUSG00000030745	Il21r	chr7:125603428-125603429	human	NA	NA
ENSMUSG00000030747	Dgat2	chr7:99182718-99182719	human	B2_Mm2_chr7:99146550-99146738	0.015405
ENSMUSG00000030748	Il4ra	chr7:125552119-125552120	shared	NA	NA
ENSMUSG00000030750	Nsmce1	chr7:125491595-125491596	mouse	NA	NA
ENSMUSG00000030751	Psma1	chr7:114276117-114276118	human	NA	NA
ENSMUSG00000030759	Far1	chr7:113513833-113513834	human	NA	NA
ENSMUSG00000030760	Acer3	chr7:98321207-98321208	mouse	NA	NA
ENSMUSG00000030766	Arhgap17	chr7:123369914-123369915	human	NA	NA
ENSMUSG00000030774	Pak1	chr7:97788540-97788541	mouse	NA	NA
ENSMUSG00000030789	Itgax	chr7:128129546-128129547	human	NA	NA
ENSMUSG00000030793	Pycard	chr7:127993866-127993867	mouse	NA	NA
ENSMUSG00000030805	Stx4a	chr7:127824293-127824294	mouse	NA	NA
ENSMUSG00000030806	Stx1b	chr7:127824548-127824549	shared	NA	NA
ENSMUSG00000030825	Hsd17b14	chr7:45554892-45554893	human	NA	NA
ENSMUSG00000030830	Itgal	chr7:127296259-127296260	shared	NA	NA
ENSMUSG00000030835	Nomo1	chr7:46033697-46033698	mouse	NA	NA
ENSMUSG00000030847	Bag3	chr7:128523615-128523616	mouse	NA	NA
ENSMUSG00000030882	Dnhd1	chr7:105650826-105650827	mouse	NA	NA
ENSMUSG00000030921	Trim30a	chr7:104465192-104465193	mouse	NA	NA
ENSMUSG00000030922	Lyrm1	chr7:119895860-119895861	human	NA	NA
ENSMUSG00000030930	Chst15	chr7:132317227-132317228	human	NA	NA
ENSMUSG00000030966	Trim21	chr7:102565485-102565486	shared	NA	NA
ENSMUSG00000030990	Pgap2	chr7:102210207-102210208	mouse	NA	NA
ENSMUSG00000031103	Elf4	chrX:48463131-48463132	human	NA	NA
ENSMUSG00000108024	RP24-430K15.4	chr6:113689854-113689855	mouse	B2_Mm2_chr6:113663382-113663419	0.025678
ENSMUSG00000029861	Fam131b	chr6:42324642-42324643	mouse	B2_Mm2_chr6:42338693-42338886	0.025607
ENSMUSG00000031189	Aff2	chrX:69360293-69360294	human	NA	NA
ENSMUSG00000031196	F8	chrX:75382614-75382615	human	NA	NA
ENSMUSG00000031198	Fundc2	chrX:75382398-75382399	human	NA	NA
ENSMUSG00000031200	Mtcp1	chrX:75416587-75416588	mouse	NA	NA
ENSMUSG00000031201	Brcc3	chrX:75416627-75416628	mouse	NA	NA
ENSMUSG00000031207	Msn	chrX:96096041-96096042	mouse	NA	NA
ENSMUSG00000029415	Sdad1	chr5:92310478-92310479	mouse	B2_Mm2_chr5:92279606-92279780	0.025472
ENSMUSG00000031242	RP23-284F8.1	chrX:107816333-107816334	mouse	NA	NA
ENSMUSG00000031257	Nox1	chrX:134221955-134221956	mouse	NA	NA
ENSMUSG00000031292	Cdkl5	chrX:160994703-160994704	mouse	NA	NA
ENSMUSG00000031304	Il2rg	chrX:101268254-101268255	mouse	NA	NA
ENSMUSG00000031309	Rps6ka3	chrX:159210306-159210307	mouse	NA	NA
ENSMUSG00000031311	Nono	chrX:101429317-101429318	mouse	NA	NA
ENSMUSG00000031352	Hccs	chrX:169320371-169320372	human	NA	NA
ENSMUSG00000031381	Piga	chrX:164419786-164419787	shared	NA	NA
ENSMUSG00000031387	Renbp	chrX:73930849-73930850	human	NA	NA
ENSMUSG00000031391	L1cam	chrX:73896104-73896105	human	NA	NA
ENSMUSG00000031402	Mpp1	chrX:75131015-75131016	mouse	NA	NA
ENSMUSG00000031429	Psmd10	chrX:140956727-140956728	mouse	NA	NA
ENSMUSG00000031431	Tsc22d3	chrX:140600658-140600659	human	NA	NA
ENSMUSG00000031441	Atp11a	chr8:12757013-12757014	mouse	NA	NA
ENSMUSG00000031451	Gas6	chr8:13494489-13494490	human	NA	NA
ENSMUSG00000031467	Agpat5	chr8:18846276-18846277	human	NA	NA
ENSMUSG00000031497	Tnfsf13b	chr8:10006466-10006467	shared	NA	NA
ENSMUSG00000031503	Col4a2	chr8:11312804-11312805	shared	NA	NA
ENSMUSG00000031504	Rab20	chr8:11478709-11478710	human	NA	NA
ENSMUSG00000031513	Leprotl1	chr8:34147032-34147033	human	NA	NA
ENSMUSG00000031520	Vegfc	chr8:54077605-54077606	mouse	NA	NA
ENSMUSG00000031527	Eri1	chr8:35496195-35496196	human	NA	NA
ENSMUSG00000031536	Polb	chr8:22653434-22653435	shared	NA	NA
ENSMUSG00000031549	Ido2	chr8:24576332-24576333	shared	NA	NA
ENSMUSG00000031551	Ido1	chr8:24597008-24597009	shared	NA	NA
ENSMUSG00000031555	Adam9	chr8:25016926-25016927	mouse	NA	NA
ENSMUSG00000031557	Plekha2	chr8:25102375-25102376	human	NA	NA
ENSMUSG00000031558	Slit2	chr5:47983137-47983138	human	NA	NA
ENSMUSG00000031577	Tti2	chr8:31150314-31150315	human	NA	NA
ENSMUSG00000031578	Mak16	chr8:31168763-31168764	human	NA	NA
ENSMUSG00000031583	Wrn	chr8:33385526-33385527	mouse	NA	NA
ENSMUSG00000031591	Asah1	chr8:41374772-41374773	human	NA	NA
ENSMUSG00000031601	Cnot7	chr8:40515846-40515847	mouse	NA	NA
ENSMUSG00000031604	Msmo1	chr8:64733791-64733792	human	NA	NA
ENSMUSG00000031605	Klhl2	chr8:64850016-64850017	mouse	NA	NA
ENSMUSG00000031627	Irf2	chr8:46739731-46739732	shared	NA	NA
ENSMUSG00000031639	Tlr3	chr8:45411079-45411080	mouse	NA	NA
ENSMUSG00000031652	N4bp1	chr8:86885257-86885258	shared	NA	NA
ENSMUSG00000031662	Snx20	chr8:88636127-88636128	shared	NA	NA
ENSMUSG00000027884	Clcc1	chr3:108653912-108653913	mouse	B2_Mm2_chr3:108657649-108657821	0.025361
ENSMUSG00000031683	Lsm6	chr8:78821139-78821140	human	NA	NA
ENSMUSG00000031701	Dnaja2	chr8:85555343-85555344	mouse	NA	NA
ENSMUSG00000031712	Il15	chr8:82403221-82403222	shared	NA	NA
ENSMUSG00000031729	Ist1	chr8:109693259-109693260	mouse	NA	NA
ENSMUSG00000031731	Ap1g1	chr8:109778553-109778554	mouse	NA	NA
ENSMUSG00000031732	Phlpp2	chr8:109868541-109868542	mouse	NA	NA
ENSMUSG00000031756	Cenpn	chr8:116921729-116921730	human	NA	NA
ENSMUSG00000031758	Cdyl2	chr8:116732990-116732991	mouse	NA	NA
ENSMUSG00000025058	RP23-311G7.1	chrX:85870353-85870354	mouse	B2_Mm2_chrX:85771261-85771292	0.025329
ENSMUSG00000031766	Slc12a3	chr8:94329200-94329201	human	NA	NA
ENSMUSG00000031770	Herpud1	chr8:94386437-94386438	shared	NA	NA
ENSMUSG00000031778	Cx3cl1	chr8:94772008-94772009	mouse	NA	NA
ENSMUSG00000031783	Polr2c	chr8:94857449-94857450	mouse	NA	NA
ENSMUSG00000031792	Usb1	chr8:95332283-95332284	shared	NA	NA
ENSMUSG00000031799	Tpm4	chr8:72134974-72134975	mouse	NA	NA
ENSMUSG00000031803	B3gnt3	chr8:71701788-71701789	mouse	NA	NA
ENSMUSG00000031805	Jak3	chr8:71676295-71676296	shared	NA	NA
ENSMUSG00000031818	Cox4i1	chr8:120668221-120668222	mouse	NA	NA
ENSMUSG00000031838	Ifi30	chr8:70766662-70766663	shared	NA	NA
ENSMUSG00000031839	Hsbp1	chr8:119344487-119344488	mouse	NA	NA
ENSMUSG00000031853	Map3k21	chr8:125910449-125910450	human	NA	NA
ENSMUSG00000031862	Atp13a1	chr8:69791162-69791163	mouse	NA	NA
ENSMUSG00000031879	Fam96b	chr8:104641964-104641965	shared	NA	NA
ENSMUSG00000031880	Rrad	chr8:104631326-104631327	mouse	NA	NA
ENSMUSG00000031896	Ctrl	chr8:105933861-105933862	shared	NA	NA
ENSMUSG00000031897	Psmb10	chr8:105938443-105938444	shared	NA	NA
ENSMUSG00000031906	Smpd3	chr8:106337987-106337988	human	NA	NA
ENSMUSG00000031928	Mre11a	chr9:14784653-14784654	mouse	NA	NA
ENSMUSG00000031934	Panx1	chr9:15045477-15045478	shared	NA	NA
ENSMUSG00000031935	Med17	chr9:15279930-15279931	mouse	NA	NA
ENSMUSG00000031948	Kars	chr8:112011322-112011323	shared	NA	NA
ENSMUSG00000031995	St14	chr9:31131852-31131853	mouse	NA	NA
ENSMUSG00000032000	Birc3	chr9:7873185-7873186	shared	B2_Mm2_chr9:7869333-7869371	0.103985
ENSMUSG00000032002	Dcun1d5	chr9:7184519-7184520	mouse	NA	NA
ENSMUSG00000032009	Sesn3	chr9:14275066-14275067	mouse	NA	NA
ENSMUSG00000032018	Sc5d	chr9:42264255-42264256	human	B2_Mm2_chr9:40758410-40758587	0.011872
ENSMUSG00000032020	Ubash3b	chr9:41161696-41161697	mouse	NA	NA
ENSMUSG00000032021	Crtam	chr9:41004627-41004628	human	NA	NA
ENSMUSG00000032030	Cul5	chr9:53670013-53670014	human	NA	NA
ENSMUSG00000032058	Ppp2r1b	chr9:50845300-50845301	mouse	NA	NA
ENSMUSG00000032066	Bco2	chr9:50555180-50555181	mouse	NA	NA
ENSMUSG00000032078	Zpr1	chr9:46273063-46273064	human	NA	NA
ENSMUSG00000032085	Tagln	chr9:45936057-45936058	mouse	NA	NA
ENSMUSG00000032089	Il10ra	chr9:45269148-45269149	mouse	NA	NA
ENSMUSG00000032092	Mpzl2	chr9:45039798-45039799	human	NA	NA
ENSMUSG00000032103	Pus3	chr9:35558594-35558595	human	B2_Mm2_chr9:37247796-37247972	0.015823
ENSMUSG00000032115	Hyou1	chr9:44379489-44379490	mouse	NA	NA
ENSMUSG00000032120	C2cd2l	chr9:44320284-44320285	human	NA	NA
ENSMUSG00000032128	Robo3	chr9:37433245-37433246	human	B2_Mm2_chr9:37247796-37247972	0.047804
ENSMUSG00000032174	Icam5	chr9:21032072-21032073	mouse	NA	NA
ENSMUSG00000035929	H2-Q4	chr17:35379616-35379617	mouse	B2_Mm2_chr17:35259108-35259180	0.025167
ENSMUSG00000032180	Tmed1	chr9:21510251-21510252	mouse	NA	NA
ENSMUSG00000032181	Scg3	chr9:75684055-75684056	human	NA	NA
ENSMUSG00000032184	Lysmd2	chr9:75625740-75625741	shared	NA	NA
ENSMUSG00000032185	Carm1	chr9:21546893-21546894	shared	NA	NA
ENSMUSG00000006095	Tbcb	chr7:30232271-30232272	mouse	B2_Mm2_chr7:30412448-30412636	0.025162
ENSMUSG00000032202	Rab27a	chr9:73044853-73044854	shared	NA	NA
ENSMUSG00000032215	Rsl24d1	chr9:73113425-73113426	mouse	NA	NA
ENSMUSG00000032220	Myo1e	chr9:70207349-70207350	mouse	NA	NA
ENSMUSG00000032253	Phip	chr9:82975515-82975516	mouse	NA	NA
ENSMUSG00000032265	Fam46a	chr9:85327347-85327348	mouse	NA	NA
ENSMUSG00000032279	Idh3a	chr9:54586333-54586334	human	NA	NA
ENSMUSG00000032280	Tle3	chr9:61372365-61372366	human	NA	NA
ENSMUSG00000032285	Dnaja4	chr9:54698872-54698873	human	NA	NA
ENSMUSG00000032290	Ptpn9	chr9:56994922-56994923	mouse	NA	NA
ENSMUSG00000032294	Pkm	chr9:59656367-59656368	mouse	NA	NA
ENSMUSG00000032300	RP23-437A9.3	chr9:57262611-57262612	human	NA	NA
ENSMUSG00000032301	Psma4	chr9:54950789-54950790	shared	NA	NA
ENSMUSG00000032320	Rcn2	chr9:56041844-56041845	mouse	NA	NA
ENSMUSG00000032328	Tmem30a	chr9:79793506-79793507	shared	NA	NA
ENSMUSG00000032330	Cox7a2	chr9:79759877-79759878	human	B2_Mm2_chr9:79751328-79751513	0.018806
ENSMUSG00000032333	Stoml1	chr9:58253163-58253164	shared	NA	NA
ENSMUSG00000032342	Mto1	chr9:78448207-78448208	human	B2_Mm2_chr9:78473070-78473227	0.01144
ENSMUSG00000032344	Mb21d1	chr9:78443236-78443237	shared	NA	NA
ENSMUSG00000032353	Tmed3	chr9:89705067-89705068	mouse	NA	NA
ENSMUSG00000032356	Rasgrf1	chr9:89909907-89909908	human	NA	NA
ENSMUSG00000032359	Ctsh	chr9:90054151-90054152	human	NA	NA
ENSMUSG00000032369	Plscr1	chr9:92249749-92249750	mouse	NA	NA
ENSMUSG00000032370	Lactb	chr9:66975483-66975484	human	NA	NA
ENSMUSG00000032386	Trip4	chr9:65908793-65908794	human	NA	NA
ENSMUSG00000032410	Xrn1	chr9:95954759-95954760	shared	NA	NA
ENSMUSG00000032412	Atp1b3	chr9:96364441-96364442	shared	B2_Mm2_chr9:99089606-99089794	0.011549
ENSMUSG00000032434	Cmtm6	chr9:114731115-114731116	shared	NA	NA
ENSMUSG00000032435	Dync1li1	chr9:114688789-114688790	human	NA	NA
ENSMUSG00000032436	Cmtm7	chr9:114781855-114781856	mouse	NA	NA
ENSMUSG00000019738	Polr2i	chr7:30231947-30231948	mouse	B2_Mm2_chr7:30412448-30412636	0.025161
ENSMUSG00000087541	Hopxos	chr5:77094531-77094532	mouse	B2_Mm2_chr5:77252490-77252664	0.025107
ENSMUSG00000032470	Mras	chr9:99437380-99437381	human	B2_Mm2_chr9:99089606-99089794	0.030913
ENSMUSG00000032477	Cdc25a	chr9:109875578-109875579	mouse	NA	NA
ENSMUSG00000032479	Map4	chr9:109931459-109931460	mouse	NA	NA
ENSMUSG00000032487	Ptgs2	chr1:150100030-150100031	shared	NA	NA
ENSMUSG00000032501	Trib1	chr15:59648349-59648350	mouse	NA	NA
ENSMUSG00000032504	Pdcd6ip	chr9:113708258-113708259	mouse	NA	NA
ENSMUSG00000027425	Csrp2bp	chr2:144368982-144368983	mouse	B2_Mm2_chr2:144338121-144338156	0.024954
ENSMUSG00000032508	Myd88	chr9:119341410-119341411	shared	NA	NA
ENSMUSG00000032515	Csrnp1	chr9:119984657-119984658	mouse	NA	NA
ENSMUSG00000032519	Slc25a38	chr9:120110373-120110374	mouse	NA	NA
ENSMUSG00000032531	Amotl2	chr9:102716671-102716672	mouse	NA	NA
ENSMUSG00000032536	Trak1	chr9:121297501-121297502	mouse	NA	NA
ENSMUSG00000032537	Ephb1	chr9:102354692-102354693	human	NA	NA
ENSMUSG00000032540	Abhd5	chr9:122351607-122351608	human	NA	NA
ENSMUSG00000032557	Uba5	chr9:104063133-104063134	mouse	NA	NA
ENSMUSG00000032560	Dnajc13	chr9:104262929-104262930	mouse	NA	NA
ENSMUSG00000032563	Mrpl3	chr9:105053238-105053239	mouse	NA	NA
ENSMUSG00000032567	Aste1	chr9:105395391-105395392	mouse	NA	NA
ENSMUSG00000032575	Manf	chr9:106891978-106891979	mouse	NA	NA
ENSMUSG00000032578	Cish	chr9:107296025-107296026	shared	NA	NA
ENSMUSG00000032596	Uba7	chr9:107975504-107975505	mouse	NA	NA
ENSMUSG00000032609	Klhdc8b	chr9:108461580-108461581	human	NA	NA
ENSMUSG00000032615	Nt5m	chr11:59839446-59839447	mouse	NA	NA
ENSMUSG00000032624	Eml4	chr17:83350930-83350931	mouse	NA	NA
ENSMUSG00000032637	Atxn2l	chr7:126503436-126503437	mouse	NA	NA
ENSMUSG00000032643	Fhl3	chr4:124700700-124700701	mouse	NA	NA
ENSMUSG00000032652	Crebl2	chr6:134830153-134830154	human	B2_Mm2_chr6:134640561-134640761	0.037156
ENSMUSG00000032661	Oas3	chr5:120777660-120777661	mouse	NA	NA
ENSMUSG00000032688	Malt1	chr18:65430961-65430962	mouse	NA	NA
ENSMUSG00000032690	Oas2	chr5:120749852-120749853	mouse	NA	NA
ENSMUSG00000032691	Nlrp3	chr11:59541567-59541568	mouse	NA	NA
ENSMUSG00000032712	RP23-214L4.1	chr6:149309413-149309414	mouse	NA	NA
ENSMUSG00000032715	Trib3	chr2:152344031-152344032	human	NA	NA
ENSMUSG00000032724	Abtb2	chr2:103566309-103566310	mouse	NA	NA
ENSMUSG00000032739	Pram1	chr17:33638055-33638056	human	B2_Mm2_chr17:33656893-33657075	0.016309
ENSMUSG00000032745	Gpbp1	chr13:111490110-111490111	shared	NA	NA
ENSMUSG00000032766	Gng11	chr6:4003903-4003904	mouse	NA	NA
ENSMUSG00000032786	Alas1	chr9:106248653-106248654	human	B2_Mm2_chr9:106229802-106229910	0.018155
ENSMUSG00000032802	Srxn1	chr2:152105515-152105516	human	NA	NA
ENSMUSG00000032815	Fanca	chr8:123318575-123318576	human	NA	NA
ENSMUSG00000032826	Ank2	chr3:127499349-127499350	mouse	NA	NA
ENSMUSG00000032841	Prr5l	chr2:101883026-101883027	shared	NA	NA
ENSMUSG00000032845	Alpk2	chr18:65393887-65393888	mouse	NA	NA
ENSMUSG00000098387	Pet117	chr2:144368995-144368996	mouse	B2_Mm2_chr2:144338121-144338156	0.024954
ENSMUSG00000032860	P2ry2	chr7:101012865-101012866	human	NA	NA
ENSMUSG00000032867	Fbxw8	chr5:118155463-118155464	mouse	NA	NA
ENSMUSG00000032869	Psmf1	chr2:151744185-151744186	human	NA	NA
ENSMUSG00000032872	Cyb5r4	chr9:87022013-87022014	human	NA	NA
ENSMUSG00000032932	Hspa13	chr16:75767103-75767104	human	NA	NA
ENSMUSG00000097479	Gm26582	chr5:92043063-92043064	mouse	B2_Mm2_chr5:92107216-92107402	0.024941
ENSMUSG00000032952	Ap4b1	chr3:103809519-103809520	mouse	NA	NA
ENSMUSG00000033004	Mycbp2	chr14:103346813-103346814	mouse	NA	NA
ENSMUSG00000033039	Micall1	chr15:79108897-79108898	human	NA	NA
ENSMUSG00000033075	Senp1	chr15:98093743-98093744	mouse	NA	NA
ENSMUSG00000033082	Clec1a	chr6:129451999-129452000	shared	NA	NA
ENSMUSG00000033088	Triobp	chr15:78947723-78947724	mouse	NA	NA
ENSMUSG00000033096	Apmap	chr2:150608566-150608567	mouse	NA	NA
ENSMUSG00000033105	Lss	chr10:76531587-76531588	human	NA	NA
ENSMUSG00000033147	Slc22a15	chr3:101924452-101924453	shared	NA	NA
ENSMUSG00000033184	Tmed7	chr18:46597534-46597535	mouse	NA	NA
ENSMUSG00000033186	Mzt1	chr14:99046133-99046134	human	NA	NA
ENSMUSG00000033192	Lpcat2	chr8:92855338-92855339	human	NA	NA
ENSMUSG00000033213	RP23-101F14.3	chr2:122636985-122636986	shared	NA	NA
ENSMUSG00000033272	Slc35a4	chr18:36679214-36679215	human	NA	NA
ENSMUSG00000028657	Ppt1	chr4:122836241-122836242	mouse	B2_Mm2_chr4:122860243-122860391	0.024846
ENSMUSG00000033306	Lpp	chr16:24393506-24393507	mouse	NA	NA
ENSMUSG00000033308	Dpyd	chr3:118562128-118562129	human	NA	NA
ENSMUSG00000033319	Fem1c	chr18:46525970-46525971	human	B2_Mm2_chr18:46563644-46563798	0.01095
ENSMUSG00000033350	Chst2	chr9:95406721-95406722	human	B2_Mm2_chr9:99089606-99089794	0.016149
ENSMUSG00000033352	Map2k4	chr11:65788296-65788297	mouse	NA	NA
ENSMUSG00000033355	Rtp4	chr16:23520290-23520291	mouse	NA	NA
ENSMUSG00000033368	Trim69	chr2:122160699-122160700	human	NA	NA
ENSMUSG00000033386	Frrs1	chr3:116859463-116859464	human	NA	NA
ENSMUSG00000033450	Tagap	chr17:7925999-7926000	mouse	B2_Mm2_chr17:7937454-7937642	0.024746
ENSMUSG00000033487	Fndc3a	chr14:72710002-72710003	mouse	NA	NA
ENSMUSG00000033530	Ttc7b	chr12:100520825-100520826	human	B2_Mm2_chr12:100508431-100508624	0.03541
ENSMUSG00000033538	Casp4	chr9:5308827-5308828	mouse	NA	NA
ENSMUSG00000033557	Fam20b	chr1:156719085-156719086	mouse	NA	NA
ENSMUSG00000033576	Apol6	chr15:77044728-77044729	mouse	NA	NA
ENSMUSG00000033581	Igf2bp2	chr16:22163298-22163299	mouse	NA	NA
ENSMUSG00000033623	Pcgf3	chr5:108461231-108461232	mouse	NA	NA
ENSMUSG00000033644	Piwil2	chr14:70429382-70429383	mouse	NA	NA
ENSMUSG00000033671	Cep350	chr1:155973254-155973255	mouse	NA	NA
ENSMUSG00000033713	Foxn3	chr12:99563581-99563582	mouse	NA	NA
ENSMUSG00000033730	Egr3	chr14:70077202-70077203	shared	NA	NA
ENSMUSG00000033732	Sf3b3	chr8:110846786-110846787	mouse	NA	NA
ENSMUSG00000033767	D930015E06Rik	chr3:84040174-84040175	human	NA	NA
ENSMUSG00000033781	Asb13	chr13:3634031-3634032	mouse	NA	NA
ENSMUSG00000033788	Dysf	chr6:84008589-84008590	human	NA	NA
ENSMUSG00000033792	Atp7a	chrX:106027275-106027276	mouse	NA	NA
ENSMUSG00000033793	Atp6v1h	chr1:5070017-5070018	human	NA	NA
ENSMUSG00000033799	Fam208b	chr13:3611107-3611108	mouse	NA	NA
ENSMUSG00000033805	Ephx4	chr5:107402735-107402736	mouse	NA	NA
ENSMUSG00000033847	Pla2g4c	chr7:13324654-13324655	human	NA	NA
ENSMUSG00000033863	Klf9	chr19:23141225-23141226	human	NA	NA
ENSMUSG00000033871	Ppargc1b	chr18:61400430-61400431	shared	NA	NA
ENSMUSG00000033880	Lgals3bp	chr11:118402091-118402092	shared	NA	NA
ENSMUSG00000033885	Pxk	chr14:8098210-8098211	mouse	NA	NA
ENSMUSG00000033909	Usp36	chr11:118290243-118290244	mouse	NA	NA
ENSMUSG00000033910	Gucy1a3	chr3:82145788-82145789	human	NA	NA
ENSMUSG00000033931	Rbm34	chr8:126971070-126971071	human	NA	NA
ENSMUSG00000026664	Phyh	chr2:4919018-4919019	mouse	B2_Mm2_chr2:5012232-5012408	0.024671
ENSMUSG00000033960	Jcad	chr18:4634928-4634929	mouse	NA	NA
ENSMUSG00000033987	Dnah17	chr11:118130633-118130634	mouse	NA	NA
ENSMUSG00000034006	Pqlc1	chr18:80253291-80253292	mouse	NA	NA
ENSMUSG00000034007	Scaper	chr9:55938118-55938119	human	NA	NA
ENSMUSG00000034009	Rxfp1	chr3:79737879-79737880	human	NA	NA
ENSMUSG00000034028	Cd226	chr18:89197430-89197431	human	NA	NA
ENSMUSG00000034066	Farp2	chr1:93512078-93512079	human	NA	NA
ENSMUSG00000034075	Zdhhc5	chr2:84715179-84715180	mouse	NA	NA
ENSMUSG00000034088	Hdlbp	chr1:93478814-93478815	mouse	NA	NA
ENSMUSG00000038784	Cnot4	chr6:35133723-35133724	mouse	B2_Mm2_chr6:35147946-35148131	0.024587
ENSMUSG00000034116	Vav1	chr17:57279099-57279100	mouse	NA	NA
ENSMUSG00000034117	Ptgdr2	chr19:10937159-10937160	mouse	NA	NA
ENSMUSG00000034118	Tpst1	chr5:130073325-130073326	mouse	NA	NA
ENSMUSG00000034127	Tspan8	chr10:115816831-115816832	mouse	NA	NA
ENSMUSG00000034135	Sik3	chr9:46012819-46012820	shared	NA	NA
ENSMUSG00000034165	Ccnd3	chr17:47505050-47505051	human	NA	NA
ENSMUSG00000034171	Faah	chr4:116017925-116017926	human	NA	NA
ENSMUSG00000034258	Mfsd7c	chr12:85746538-85746539	human	B2_Mm2_chr12:87406808-87406992	0.01061
ENSMUSG00000034259	Exosc4	chr15:76327396-76327397	human	NA	NA
ENSMUSG00000072620	Slfn2	chr11:83065111-83065112	mouse	B2_Mm2_chr11:83039171-83039355	0.024507
ENSMUSG00000034271	Jdp2	chr12:85599026-85599027	mouse	NA	NA
ENSMUSG00000034297	Med13	chr11:86357601-86357602	mouse	NA	NA
ENSMUSG00000034320	Slc26a2	chr18:61211611-61211612	mouse	NA	NA
ENSMUSG00000034327	Kctd9	chr14:67715936-67715937	human	NA	NA
ENSMUSG00000034329	Brip1	chr11:86201192-86201193	human	NA	NA
ENSMUSG00000099104	RP23-376B1.4	chr17:8566949-8566950	mouse	B2_Mm2_chr17:8311505-8311702	0.024322
ENSMUSG00000034343	Ube2f	chr1:91250303-91250304	mouse	NA	NA
ENSMUSG00000034371	Tkfc	chr19:10604257-10604258	human	NA	NA
ENSMUSG00000034390	Cmip	chr8:117257063-117257064	human	NA	NA
ENSMUSG00000034394	Lif	chr11:4257556-4257557	mouse	NA	NA
ENSMUSG00000034422	Parp14	chr16:35871543-35871544	shared	NA	NA
ENSMUSG00000034432	Cops8	chr1:90602980-90602981	mouse	NA	NA
ENSMUSG00000034438	Gbp8	chr5:105139539-105139540	mouse	NA	NA
ENSMUSG00000034445	Cyb561a3	chr19:10577453-10577454	human	NA	NA
ENSMUSG00000061232	H2-K1	chr17:34000332-34000333	mouse	B2_Mm2_chr17:33969030-33969208	0.024261
ENSMUSG00000029050	Ski	chr4:155222591-155222592	mouse	B2_Mm2_chr4:155248498-155248526	0.024008
ENSMUSG00000034573	Ptpn13	chr5:103425191-103425192	mouse	NA	NA
ENSMUSG00000107659	RP23-49L8.5	chr6:88503604-88503605	mouse	B2_Mm2_chr6:88904510-88904676	0.023907
ENSMUSG00000034591	Slc41a2	chr10:83337881-83337882	mouse	NA	NA
ENSMUSG00000034595	Ppp1r18	chr17:35865592-35865593	mouse	NA	NA
ENSMUSG00000034612	Chst11	chr10:82985497-82985498	human	NA	NA
ENSMUSG00000034614	Pik3ip1	chr11:3330400-3330401	mouse	NA	NA
ENSMUSG00000034617	Mtrr	chr13:68582148-68582149	human	NA	NA
ENSMUSG00000034653	Ythdc2	chr18:44827745-44827746	mouse	NA	NA
ENSMUSG00000034656	Cacna1a	chr8:84388439-84388440	human	NA	NA
ENSMUSG00000034659	Tmem109	chr19:10882000-10882001	human	NA	NA
ENSMUSG00000034663	Bmp2k	chr5:96997688-96997689	mouse	NA	NA
ENSMUSG00000034674	Tdg	chr10:82629827-82629828	mouse	NA	NA
ENSMUSG00000034707	Gns	chr10:121365089-121365090	human	NA	NA
ENSMUSG00000034708	Grn	chr11:102430314-102430315	human	NA	NA
ENSMUSG00000034730	Adgrb1	chr15:74516194-74516195	shared	NA	NA
ENSMUSG00000034731	Dgkh	chr14:78732775-78732776	mouse	NA	NA
ENSMUSG00000034744	Nagk	chr6:83794981-83794982	human	NA	NA
ENSMUSG00000034765	Dusp5	chr19:53529108-53529109	shared	NA	NA
ENSMUSG00000034789	Rab24	chr13:55321945-55321946	human	NA	NA
ENSMUSG00000034792	Gna15	chr10:81524224-81524225	mouse	NA	NA
ENSMUSG00000042744	AC126938.1	chr5:121220218-121220219	mouse	B2_Mm2_chr5:121389850-121390039	0.023864
ENSMUSG00000034833	Tespa1	chr10:130322869-130322870	human	NA	NA
ENSMUSG00000045795	Whamm	chr7:81571265-81571266	mouse	B2_Mm2_chr7:81762169-81762334	0.023798
ENSMUSG00000034855	Cxcl10	chr5:92348888-92348889	shared	NA	NA
ENSMUSG00000034872	Gipc3	chr10:81343265-81343266	mouse	NA	NA
ENSMUSG00000034875	Nudt19	chr7:35556303-35556304	mouse	NA	NA
ENSMUSG00000038167	Plekhg6	chr6:125380792-125380793	mouse	B2_Mm2_chr6:125366230-125366419	0.023641
ENSMUSG00000034973	Dopey1	chr9:86467153-86467154	shared	NA	NA
ENSMUSG00000034987	Hrh2	chr13:54192128-54192129	mouse	NA	NA
ENSMUSG00000034998	Foxn2	chr17:88440710-88440711	human	B2_Mm2_chr17:88551355-88551540	0.062392
ENSMUSG00000035004	Igsf6	chr7:121074571-121074572	human	B2_Mm2_chr7:121072407-121072593	0.123434
ENSMUSG00000098445	Mir6972	chr17:34857631-34857632	mouse	B2_Mm2_chr17:34952918-34953069	0.023494
ENSMUSG00000035021	Baz1a	chr12:55014347-55014348	shared	NA	NA
ENSMUSG00000035032	Nek11	chr9:105395523-105395524	mouse	NA	NA
ENSMUSG00000004296	Il12b	chr11:44400062-44400063	mouse	B2_Mm2_chr11:45753141-45753308	0.023481
ENSMUSG00000035047	Kri1	chr9:21287968-21287969	mouse	NA	NA
ENSMUSG00000035049	Rrp12	chr19:41896152-41896153	shared	NA	NA
ENSMUSG00000035051	Dhx57	chr17:80290475-80290476	human	NA	NA
ENSMUSG00000029599	Ddx54	chr5:120612738-120612739	mouse	B2_Mm2_chr5:120517511-120517544	0.023248
ENSMUSG00000035105	Egln3	chr12:54203859-54203860	human	NA	NA
ENSMUSG00000035107	Dcbld2	chr16:58408442-58408443	mouse	NA	NA
ENSMUSG00000035133	Arhgap5	chr12:52503971-52503972	mouse	NA	NA
ENSMUSG00000035139	Secisbp2	chr13:51651696-51651697	human	NA	NA
ENSMUSG00000035164	Zc3h12c	chr9:52168571-52168572	shared	NA	NA
ENSMUSG00000035168	Tanc1	chr2:59612041-59612042	mouse	NA	NA
ENSMUSG00000035171	RP23-341M13.1	chr19:21652975-21652976	mouse	NA	NA
ENSMUSG00000035186	Ubd	chr17:37193891-37193892	shared	NA	NA
ENSMUSG00000035199	Arl6ip5	chr6:97210688-97210689	mouse	NA	NA
ENSMUSG00000032939	Nup93	chr8:94214563-94214564	mouse	B2_Mm2_chr8:94174129-94174291	0.023244
ENSMUSG00000035227	Spcs2	chr7:99863461-99863462	mouse	NA	NA
ENSMUSG00000035232	Pdk3	chrX:93832200-93832201	mouse	NA	NA
ENSMUSG00000035235	Trim13	chr14:61598246-61598247	mouse	NA	NA
ENSMUSG00000035237	Lcat	chr8:105943381-105943382	mouse	NA	NA
ENSMUSG00000035239	Neu3	chr7:99828416-99828417	mouse	NA	NA
ENSMUSG00000041598	Cdc42ep4	chr11:113751880-113751881	mouse	B2_Mm2_chr11:113815699-113815816	0.023229
ENSMUSG00000035248	Zcchc6	chr13:59823146-59823147	mouse	NA	NA
ENSMUSG00000035268	Pkig	chr2:163658385-163658386	mouse	NA	NA
ENSMUSG00000022136	Dnajc3	chr14:118937975-118937976	mouse	B2_Mm2_chr14:118690847-118691036	0.023212
ENSMUSG00000035299	Mid1	chrX:169685198-169685199	mouse	NA	NA
ENSMUSG00000035311	Gnptab	chr10:88379131-88379132	human	NA	NA
ENSMUSG00000035314	Gdpd5	chr7:99381413-99381414	human	NA	NA
ENSMUSG00000079505	RP23-331E12.9	chr17:35380291-35380292	mouse	B2_Mm2_chr17:35259108-35259180	0.023082
ENSMUSG00000035342	Lzts2	chr19:45015175-45015176	mouse	NA	NA
ENSMUSG00000035352	Ccl12	chr11:82101844-82101845	shared	NA	NA
ENSMUSG00000035354	Uvrag	chr7:99141140-99141141	human	B2_Mm2_chr7:99146550-99146738	0.115816
ENSMUSG00000007029	Vars	chr17:35000986-35000987	mouse	B2_Mm2_chr17:34952918-34953069	0.023011
ENSMUSG00000035356	Nfkbiz	chr16:55838898-55838899	mouse	NA	NA
ENSMUSG00000035373	Ccl7	chr11:82045711-82045712	mouse	NA	NA
ENSMUSG00000035376	Hacd2	chr16:35022427-35022428	mouse	NA	NA
ENSMUSG00000035382	Pcsk7	chr9:45906496-45906497	mouse	NA	NA
ENSMUSG00000035385	Ccl2	chr11:82035570-82035571	mouse	NA	NA
ENSMUSG00000035392	Dennd1a	chr2:38287389-38287390	mouse	NA	NA
ENSMUSG00000035403	Crb2	chr2:37776248-37776249	mouse	NA	NA
ENSMUSG00000035441	Myo1d	chr11:80780024-80780025	mouse	NA	NA
ENSMUSG00000085667	RP23-13A13.4	chr4:131920028-131920029	mouse	B2_Mm2_chr4:132268963-132269143	0.022948
ENSMUSG00000035469	Rcbtb1	chr14:59201208-59201209	mouse	NA	NA
ENSMUSG00000035473	Galm	chr17:80127470-80127471	human	NA	NA
ENSMUSG00000035498	Cdcp1	chr9:123216037-123216038	human	NA	NA
ENSMUSG00000035517	Tdrd7	chr4:45965333-45965334	shared	NA	NA
ENSMUSG00000035530	Eif1	chr11:100319884-100319885	shared	B2_Mm2_chr11:100323612-100323713	0.013171
ENSMUSG00000035561	Aldh1b1	chr4:45799021-45799022	mouse	NA	NA
ENSMUSG00000035578	Iqcg	chr16:33056217-33056218	mouse	NA	NA
ENSMUSG00000035585	Tsen34	chr7:3692862-3692863	human	NA	NA
ENSMUSG00000035594	Chrna5	chr9:54980879-54980880	mouse	NA	NA
ENSMUSG00000035673	Sbno2	chr10:80105570-80105571	shared	B2_Mm2_chr10:79984619-79984781	0.015504
ENSMUSG00000035678	Tnfsf9	chr17:57105384-57105385	mouse	NA	NA
ENSMUSG00000035692	Isg15	chr4:156200817-156200818	mouse	NA	NA
ENSMUSG00000035699	Slc51a	chr16:32487878-32487879	human	NA	NA
ENSMUSG00000035711	Dok3	chr13:55529295-55529296	human	NA	NA
ENSMUSG00000035725	Prkx	chrX:77796277-77796278	mouse	NA	NA
ENSMUSG00000035783	Acta2	chr19:34255335-34255336	human	B2_Mm2_chr19:34471720-34471895	0.021234
ENSMUSG00000035828	Pim3	chr15:88862185-88862186	human	NA	NA
ENSMUSG00000035829	Ppp1r26	chr2:28446799-28446800	mouse	NA	NA
ENSMUSG00000070720	Tmem200b	chr4:131921770-131921771	mouse	B2_Mm2_chr4:132268963-132269143	0.022947
ENSMUSG00000035901	Dennd5a	chr7:109960469-109960470	human	B2_Mm2_chr7:109977601-109977773	0.016635
ENSMUSG00000018925	Heatr9	chr11:83522174-83522175	mouse	B2_Mm2_chr11:83663111-83663292	0.02275
ENSMUSG00000035954	Dock4	chr12:40445951-40445952	mouse	NA	NA
ENSMUSG00000036006	Fam65b	chr13:24582188-24582189	human	NA	NA
ENSMUSG00000036019	Tmtc2	chr10:105574450-105574451	mouse	NA	NA
ENSMUSG00000036053	Fmnl2	chr2:52857859-52857860	shared	NA	NA
ENSMUSG00000036067	Slc2a6	chr2:27027997-27027998	shared	NA	NA
ENSMUSG00000036093	Arl5a	chr2:52424900-52424901	mouse	NA	NA
ENSMUSG00000036099	Vezt	chr10:94035816-94035817	mouse	NA	NA
ENSMUSG00000036138	Acaa1a	chr9:119339675-119339676	mouse	NA	NA
ENSMUSG00000036158	Prickle1	chr15:93595890-93595891	human	NA	NA
ENSMUSG00000020326	Ccng1	chr11:40755310-40755311	mouse	B2_Mm2_chr11:40745909-40746102	0.022594
ENSMUSG00000036180	Gatad2a	chr8:69996383-69996384	mouse	NA	NA
ENSMUSG00000036206	Sh3bp4	chr1:89070414-89070415	shared	NA	NA
ENSMUSG00000036225	Kctd1	chr18:15151445-15151446	mouse	NA	NA
ENSMUSG00000036249	Rbm43	chr2:51935162-51935163	mouse	NA	NA
ENSMUSG00000036273	Lrrk2	chr15:91673174-91673175	shared	NA	NA
ENSMUSG00000036275	RP23-289H16.2	chr11:52396427-52396428	shared	NA	NA
ENSMUSG00000036298	Slc2a13	chr15:91573260-91573261	human	NA	NA
ENSMUSG00000036299	BC031181	chr18:75005899-75005900	shared	NA	NA
ENSMUSG00000036304	Zdhhc23	chr16:43979790-43979791	shared	NA	NA
ENSMUSG00000036322	H2-Ea-ps	chr17:34344642-34344643	human	NA	NA
ENSMUSG00000036330	Slc18a1	chr8:69089234-69089235	human	NA	NA
ENSMUSG00000036353	P2ry12	chr3:59262870-59262871	mouse	NA	NA
ENSMUSG00000036362	P2ry13	chr3:59210881-59210882	mouse	NA	NA
ENSMUSG00000036381	P2ry14	chr3:59153617-59153618	shared	NA	NA
ENSMUSG00000036398	Ppp1r11	chr17:36951740-36951741	shared	NA	NA
ENSMUSG00000036402	Gng12	chr6:66896396-66896397	mouse	NA	NA
ENSMUSG00000036412	Arsi	chr18:60911779-60911780	mouse	NA	NA
ENSMUSG00000036432	Siah2	chr3:58692399-58692400	shared	NA	NA
ENSMUSG00000036478	Btg1	chr10:96617005-96617006	mouse	NA	NA
ENSMUSG00000036502	Tmem255a	chrX:38252438-38252439	human	NA	NA
ENSMUSG00000036503	Rnf13	chr3:57736061-57736062	human	NA	NA
ENSMUSG00000036580	Spg20	chr3:55112107-55112108	human	NA	NA
ENSMUSG00000036587	Fut7	chr2:25423266-25423267	human	NA	NA
ENSMUSG00000036613	Tssc1	chr12:28751802-28751803	mouse	NA	NA
ENSMUSG00000036617	Etl4	chr2:19909779-19909780	mouse	NA	NA
ENSMUSG00000036622	Atp13a2	chr4:140986872-140986873	human	NA	NA
ENSMUSG00000029048	Rer1	chr4:155086381-155086382	mouse	B2_Mm2_chr4:155248498-155248526	0.022082
ENSMUSG00000036636	Clcn7	chr17:25133390-25133391	mouse	NA	NA
[truncated: 1,720 more rows]

## Sheet: B2 near mouse-specific ISGs
Gene ID	Gene name	Gene TSS coordinates	Species specificity	ABC predicted B2_Mm2 enhancer	ABC score
ENSMUSG00000025898	Cwf19l2	chr9:3403591-3403592	mouse	B2_Mm2_chr9:3403481-3403663	0.803377
ENSMUSG00000019802	Sec63	chr10:42761495-42761496	mouse	B2_Mm2_chr10:42760233-42760346	0.368623
ENSMUSG00000066148	Prpf4	chr4:62408796-62408797	mouse	B2_Mm2_chr4:62407240-62407421	0.35125
ENSMUSG00000026526	Fh1	chr1:175625634-175625635	mouse	B2_Mm2_chr1:175626089-175626272	0.27937
ENSMUSG00000056692	RP24-535N4.2	chr17:27820557-27820558	mouse	B2_Mm2_chr17:27826636-27826802	0.225365
ENSMUSG00000029413	Naaa	chr5:92278169-92278170	mouse	B2_Mm2_chr5:92279606-92279780	0.213282
ENSMUSG00000090877	Hspa1b	chr17:34959237-34959238	mouse	B2_Mm2_chr17:34952918-34953069	0.201572
ENSMUSG00000021036	Sptlc2	chr12:87388354-87388355	mouse	B2_Mm2_chr12:87406808-87406992	0.197376
ENSMUSG00000020577	Tspan13	chr12:36042499-36042500	mouse	B2_Mm2_chr12:36037000-36037062	0.194528
ENSMUSG00000018930	Ccl4	chr11:83662583-83662584	mouse	B2_Mm2_chr11:83663111-83663292	0.190787
ENSMUSG00000036931	Nfkbid	chr7:30421731-30421732	mouse	B2_Mm2_chr7:30412448-30412636	0.182661
ENSMUSG00000024217	Snrpc	chr17:27839973-27839974	mouse	B2_Mm2_chr17:27826636-27826802	0.17534
ENSMUSG00000061589	Dot1l	chr10:80755205-80755206	mouse	B2_Mm2_chr10:80751200-80751354	0.166134
ENSMUSG00000025626	Phf6	chrX:52912265-52912266	mouse	B2_Mm2_chrX:52928972-52929150	0.142646
ENSMUSG00000097558	Gm26902	chr19:34474807-34474808	mouse	B2_Mm2_chr19:34471720-34471895	0.141337
ENSMUSG00000020707	Rnf135	chr11:80183850-80183851	mouse	B2_Mm2_chr11:80183497-80183583	0.134964
ENSMUSG00000029798	Herc6	chr6:57580999-57581000	mouse	B2_Mm2_chr6:57581896-57581921	0.132386
ENSMUSG00000041415	Dicer1	chr12:104751951-104751952	mouse	B2_Mm2_chr12:104742467-104742646	0.127508
ENSMUSG00000086784	Isoc2a	chr7:4877152-4877153	mouse	B2_Mm2_chr7:4865130-4865296	0.124563
ENSMUSG00000106209	RP23-50I16.2	chr5:121385521-121385522	mouse	B2_Mm2_chr5:121389850-121390039	0.121061
ENSMUSG00000037400	Atp11b	chr3:35754105-35754106	mouse	B2_Mm2_chr3:35755834-35756023	0.11727
ENSMUSG00000035093	Secisbp2l	chr2:125782869-125782870	mouse	B2_Mm2_chr2:125775266-125775455	0.109112
ENSMUSG00000025059	Gk	chrX:85776818-85776819	mouse	B2_Mm2_chrX:85771261-85771292	0.10715
ENSMUSG00000097367	Gm26718	chr5:110259162-110259163	mouse	B2_Mm2_chr5:110231636-110231742	0.106606
ENSMUSG00000029249	Rest	chr5:77265490-77265491	mouse	B2_Mm2_chr5:77252490-77252664	0.105861
ENSMUSG00000026525	Opn3	chr1:175692775-175692776	mouse	B2_Mm2_chr1:175626089-175626272	0.102363
ENSMUSG00000006169	Clint1	chr11:45852050-45852051	mouse	B2_Mm2_chr11:45753141-45753308	0.095558
ENSMUSG00000029410	Ppef2	chr5:92256277-92256278	mouse	B2_Mm2_chr5:92279606-92279780	0.094113
ENSMUSG00000031762	Mt2	chr8:94172663-94172664	mouse	B2_Mm2_chr8:94174129-94174291	0.093979
ENSMUSG00000110588	RP23-98C9.5	chr8:94173411-94173412	mouse	B2_Mm2_chr8:94174129-94174291	0.093978
ENSMUSG00000104985	RP23-50I16.1	chr5:121384009-121384010	mouse	B2_Mm2_chr5:121389850-121390039	0.093112
ENSMUSG00000087439	AC118260.5	chr5:110262160-110262161	mouse	B2_Mm2_chr5:110231636-110231742	0.092522
ENSMUSG00000031671	Setd6	chr8:95715880-95715881	mouse	B2_Mm2_chr8:95719357-95719534	0.091458
ENSMUSG00000037279	Ovol2	chr2:144332145-144332146	mouse	B2_Mm2_chr2:144338121-144338156	0.088646
ENSMUSG00000017832	Hspb9	chr11:100713849-100713850	mouse	B2_Mm2_chr11:100702548-100702730	0.08672
ENSMUSG00000002658	Gtf2f1	chr17:57011287-57011288	mouse	B2_Mm2_chr17:57017192-57017361	0.08668
ENSMUSG00000073599	Ecscr	chr18:35722355-35722356	mouse	B2_Mm2_chr18:35709238-35709374	0.085875
ENSMUSG00000097125	Gm26885	chr17:29491924-29491925	mouse	B2_Mm2_chr17:29498400-29498553	0.083309
ENSMUSG00000032507	Fbxl2	chr9:114046190-114046191	mouse	B2_Mm2_chr9:114027045-114027222	0.082219
ENSMUSG00000029500	Pgam5	chr5:110269912-110269913	mouse	B2_Mm2_chr5:110231636-110231742	0.082019
ENSMUSG00000028788	Ptp4a2	chr4:129811218-129811219	mouse	B2_Mm2_chr4:129789355-129789375	0.080046
ENSMUSG00000032849	Abcc4	chr14:118706218-118706219	mouse	B2_Mm2_chr14:118690847-118691036	0.079835
ENSMUSG00000112627	RP23-413G8.2	chr10:116949756-116949757	mouse	B2_Mm2_chr10:116944260-116944439	0.079014
ENSMUSG00000032462	Pik3cb	chr9:99140620-99140621	mouse	B2_Mm2_chr9:99089606-99089794	0.07856
ENSMUSG00000021728	Emb	chr13:117208535-117208536	mouse	B2_Mm2_chr13:117223074-117223264	0.076814
ENSMUSG00000024349	Tmem173	chr18:35740553-35740554	mouse	B2_Mm2_chr18:35746190-35746379	0.074118
ENSMUSG00000021583	Erap1	chr13:74639567-74639568	mouse	B2_Mm2_chr13:74639016-74639178	0.073952
ENSMUSG00000106698	RP23-447A7.2	chr5:92290051-92290052	mouse	B2_Mm2_chr5:92279606-92279780	0.072399
ENSMUSG00000024399	Ltb	chr17:35194438-35194439	mouse	B2_Mm2_chr17:35185761-35185930	0.071589
ENSMUSG00000085604	Dhx58os	chr11:100687416-100687417	mouse	B2_Mm2_chr11:100702548-100702730	0.071227
ENSMUSG00000087135	RP24-374N16.5	chr9:40784180-40784181	mouse	B2_Mm2_chr9:40758410-40758587	0.066084
ENSMUSG00000000555	Itga5	chr15:103366762-103366763	mouse	B2_Mm2_chr15:103394002-103394183	0.065623
ENSMUSG00000097404	Gm10814	chr19:6012619-6012620	mouse	B2_Mm2_chr19:6018525-6018714	0.065494
ENSMUSG00000064791	Snord14e	chr9:40804747-40804748	mouse	B2_Mm2_chr9:40758410-40758587	0.065361
ENSMUSG00000095118	Snord14d	chr9:40803994-40803995	mouse	B2_Mm2_chr9:40758410-40758587	0.065361
ENSMUSG00000027287	Snap23	chr2:120567670-120567671	mouse	B2_Mm2_chr2:120575771-120575953	0.065275
ENSMUSG00000050671	Ism2	chr12:87299704-87299705	mouse	B2_Mm2_chr12:87276175-87276336	0.064857
ENSMUSG00000020397	Med7	chr11:46436924-46436925	mouse	B2_Mm2_chr11:46447633-46447743	0.064235
ENSMUSG00000029580	Actb	chr5:142906753-142906754	mouse	B2_Mm2_chr5:142895733-142895818	0.063709
ENSMUSG00000039497	Dse	chr10:34207714-34207715	mouse	B2_Mm2_chr10:34209801-34209981	0.063705
ENSMUSG00000022255	Mtdh	chr15:34082693-34082694	mouse	B2_Mm2_chr15:34097135-34097307	0.063084
ENSMUSG00000029405	G3bp2	chr5:92083718-92083719	mouse	B2_Mm2_chr5:92107216-92107402	0.062511
ENSMUSG00000081512	RP23-123G8.2	chr17:34214458-34214459	mouse	B2_Mm2_chr17:34206060-34206220	0.062112
ENSMUSG00000039512	Uhrf1bp1	chr17:27856489-27856490	mouse	B2_Mm2_chr17:27826636-27826802	0.061097
ENSMUSG00000024942	Capn1	chr19:6015824-6015825	mouse	B2_Mm2_chr19:6018525-6018714	0.060526
ENSMUSG00000067203	H2-K2	chr17:33978789-33978790	mouse	B2_Mm2_chr17:33969030-33969208	0.059468
ENSMUSG00000021624	Cd180	chr13:102693557-102693558	mouse	B2_Mm2_chr13:102682360-102682566	0.059006
ENSMUSG00000092368	RP24-443D19.8	chr17:35994452-35994453	mouse	B2_Mm2_chr17:35999636-35999726	0.057613
ENSMUSG00000029499	Pxmp2	chr5:110286185-110286186	mouse	B2_Mm2_chr5:110231636-110231742	0.057234
ENSMUSG00000107961	RP23-20K24.11	chr6:86733488-86733489	mouse	B2_Mm2_chr6:86773134-86773210	0.057155
ENSMUSG00000039678	Tbc1d13	chr2:30133745-30133746	mouse	B2_Mm2_chr2:30128910-30129091	0.057131
ENSMUSG00000092550	RP23-123G8.16	chr17:34205448-34205449	mouse	B2_Mm2_chr17:34206060-34206220	0.056531
ENSMUSG00000042719	Naa25	chr5:121397935-121397936	mouse	B2_Mm2_chr5:121389850-121390039	0.056059
ENSMUSG00000112220	RP24-198I16.6	chr10:122792482-122792483	mouse	B2_Mm2_chr10:122792599-122792786	0.054964
ENSMUSG00000020211	Sf3a2	chr10:80798197-80798198	mouse	B2_Mm2_chr10:80751200-80751354	0.054104
ENSMUSG00000020732	Rab37	chr11:115091430-115091431	mouse	B2_Mm2_chr11:115080395-115080583	0.053571
ENSMUSG00000027639	Samhd1	chr2:157135264-157135265	mouse	B2_Mm2_chr2:157142214-157142364	0.052985
ENSMUSG00000107846	RP24-430K15.3	chr6:113679218-113679219	mouse	B2_Mm2_chr6:113663382-113663419	0.052977
ENSMUSG00000096976	Gm26882	chr9:90094177-90094178	mouse	B2_Mm2_chr9:90085139-90085298	0.051714
ENSMUSG00000039231	Suv39h1	chrX:8074759-8074760	mouse	B2_Mm2_chrX:8091196-8091373	0.051501
ENSMUSG00000089636	AC148988.2	chr7:19258491-19258492	mouse	B2_Mm2_chr7:19281806-19281951	0.049661
ENSMUSG00000021039	Snw1	chr12:87472273-87472274	mouse	B2_Mm2_chr12:87406808-87406992	0.048919
ENSMUSG00000006782	Cnp	chr11:100574903-100574904	mouse	B2_Mm2_chr11:100702548-100702730	0.047862
ENSMUSG00000024218	Taf11	chr17:27909241-27909242	mouse	B2_Mm2_chr17:27826636-27826802	0.047375
ENSMUSG00000005299	Letm1	chr5:33782816-33782817	mouse	B2_Mm2_chr5:33802852-33803022	0.046399
ENSMUSG00000032187	Smarca4	chr9:21616168-21616169	mouse	B2_Mm2_chr9:21609897-21609985	0.043955
ENSMUSG00000069874	Irgm2	chr11:58199617-58199618	mouse	B2_Mm2_chr11:58191280-58191441	0.043425
ENSMUSG00000078853	Igtp	chr11:58199555-58199556	mouse	B2_Mm2_chr11:58191280-58191441	0.043425
ENSMUSG00000085486	RP23-382C19.3	chr11:101599255-101599256	mouse	B2_Mm2_chr11:101627708-101627786	0.043219
ENSMUSG00000032175	Tyk2	chr9:21131242-21131243	mouse	B2_Mm2_chr9:21137136-21137222	0.043134
ENSMUSG00000038587	Akap12	chr10:4266379-4266380	mouse	B2_Mm2_chr10:4270976-4271146	0.04249
ENSMUSG00000078921	Tgtp2	chr11:49064205-49064206	mouse	B2_Mm2_chr11:49068200-49068381	0.042331
ENSMUSG00000040097	Flywch1	chr17:23771601-23771602	mouse	B2_Mm2_chr17:23754991-23755184	0.042122
ENSMUSG00000020547	Bzw2	chr12:36158079-36158080	mouse	B2_Mm2_chr12:36037000-36037062	0.041268
ENSMUSG00000027288	Zfp106	chr2:120563842-120563843	mouse	B2_Mm2_chr2:120575771-120575953	0.040537
ENSMUSG00000062352	Itgb1bp1	chr12:21286283-21286284	mouse	B2_Mm2_chr12:21369478-21369636	0.040441
ENSMUSG00000035242	Oaz1	chr10:80826655-80826656	mouse	B2_Mm2_chr10:80751200-80751354	0.039708
ENSMUSG00000057367	Birc2	chr9:7837063-7837064	mouse	B2_Mm2_chr9:7869333-7869371	0.039644
ENSMUSG00000030188	Magohb	chr6:131293243-131293244	mouse	B2_Mm2_chr6:131290533-131290723	0.039332
ENSMUSG00000090231	Cfb	chr17:34862517-34862518	mouse	B2_Mm2_chr17:34952918-34953069	0.03916
ENSMUSG00000074406	Zfp628	chr7:4915216-4915217	mouse	B2_Mm2_chr7:4865130-4865296	0.03857
ENSMUSG00000035208	Slfn8	chr11:83020809-83020810	mouse	B2_Mm2_chr11:83039171-83039355	0.038445
ENSMUSG00000063236	RP24-324P21.9	chr15:76948505-76948506	mouse	B2_Mm2_chr15:76926025-76926206	0.038413
ENSMUSG00000028790	Khdrbs1	chr4:129742302-129742303	mouse	B2_Mm2_chr4:129789355-129789375	0.038412
ENSMUSG00000035042	Ccl5	chr11:83530517-83530518	mouse	B2_Mm2_chr11:83663111-83663292	0.038349
ENSMUSG00000026159	Agfg1	chr1:82839482-82839483	mouse	B2_Mm2_chr1:82841391-82841570	0.038317
ENSMUSG00000019173	Rab5c	chr11:100738214-100738215	mouse	B2_Mm2_chr11:100702548-100702730	0.038276
ENSMUSG00000104897	RP23-331L5.1	chr3:35845341-35845342	mouse	B2_Mm2_chr3:35755834-35756023	0.037895
ENSMUSG00000044224	Dnajc21	chr15:10470515-10470516	mouse	B2_Mm2_chr15:10487401-10487572	0.037615
ENSMUSG00000034330	Plcg2	chr8:117498290-117498291	mouse	B2_Mm2_chr8:117476368-117476426	0.037159
ENSMUSG00000091896	Ube2d2a	chr18:35771558-35771559	mouse	B2_Mm2_chr18:35709238-35709374	0.037054
ENSMUSG00000072919	Noxred1	chr12:87238731-87238732	mouse	B2_Mm2_chr12:87406808-87406992	0.036066
ENSMUSG00000029407	Uso1	chr5:92137937-92137938	mouse	B2_Mm2_chr5:92107216-92107402	0.0359
ENSMUSG00000091408	RP23-100O18.2	chr6:136487185-136487186	mouse	B2_Mm2_chr6:136483843-136484025	0.035103
ENSMUSG00000024824	Rad9a	chr19:4201602-4201603	mouse	B2_Mm2_chr19:4203317-4203470	0.034936
ENSMUSG00000037826	Ppm1k	chr6:57535467-57535468	mouse	B2_Mm2_chr6:57581896-57581921	0.03487
ENSMUSG00000090812	Samd15	chr12:87199722-87199723	mouse	B2_Mm2_chr12:87406808-87406992	0.034577
ENSMUSG00000060992	Copz1	chr15:103272713-103272714	mouse	B2_Mm2_chr15:103279844-103280011	0.034551
ENSMUSG00000024339	Tap2	chr17:34203526-34203527	mouse	B2_Mm2_chr17:34206060-34206220	0.034544
ENSMUSG00000029319	Coq2	chr5:100675139-100675140	mouse	B2_Mm2_chr5:100663941-100664096	0.034095
ENSMUSG00000067219	Nipal1	chr5:72647794-72647795	mouse	B2_Mm2_chr5:72551490-72551670	0.033979
ENSMUSG00000041849	Card6	chr15:5108538-5108539	mouse	B2_Mm2_chr15:5106531-5106716	0.033899
ENSMUSG00000025332	Kdm5c	chrX:152233019-152233020	mouse	B2_Mm2_chrX:152241180-152241349	0.033147
ENSMUSG00000082292	RP24-499A8.3	chr11:58187738-58187739	mouse	B2_Mm2_chr11:58191280-58191441	0.033107
ENSMUSG00000040276	Pacsin1	chr17:27655508-27655509	mouse	B2_Mm2_chr17:27826636-27826802	0.033064
ENSMUSG00000063273	Naa15	chr3:51415147-51415148	mouse	B2_Mm2_chr3:51421924-51422114	0.032996
ENSMUSG00000029502	Golga3	chr5:110176700-110176701	mouse	B2_Mm2_chr5:110231636-110231742	0.032381
ENSMUSG00000035355	Kcnh4	chr11:100759941-100759942	mouse	B2_Mm2_chr11:100702548-100702730	0.030975
ENSMUSG00000000791	Il12rb1	chr8:70808448-70808449	mouse	B2_Mm2_chr8:70811770-70811946	0.030896
ENSMUSG00000022257	Laptm4b	chr15:34238027-34238028	mouse	B2_Mm2_chr15:34097135-34097307	0.030137
ENSMUSG00000085401	Slc39a1-ps	chr2:30159397-30159398	mouse	B2_Mm2_chr2:30128910-30129091	0.029549
ENSMUSG00000033933	Vhl	chr6:113623958-113623959	mouse	B2_Mm2_chr6:113663382-113663419	0.029428
ENSMUSG00000054855	Rnd1	chr15:98677460-98677461	mouse	B2_Mm2_chr15:98684783-98684972	0.029059
ENSMUSG00000031232	Magt1	chrX:106011905-106011906	mouse	B2_Mm2_chrX:106013329-106013508	0.028825
ENSMUSG00000022586	Ly6i	chr15:74983429-74983430	mouse	B2_Mm2_chr15:74975468-74975603	0.028587
ENSMUSG00000056116	H2-T22	chr17:36042746-36042747	mouse	B2_Mm2_chr17:35999636-35999726	0.028558
ENSMUSG00000030082	Sec61a1	chr6:88518904-88518905	mouse	B2_Mm2_chr6:88904510-88904676	0.028273
ENSMUSG00000072572	Slc39a2	chr14:51892888-51892889	mouse	B2_Mm2_chr14:51883753-51883928	0.0281
ENSMUSG00000021866	Anxa11	chr14:25842155-25842156	mouse	B2_Mm2_chr14:25830167-25830356	0.028001
ENSMUSG00000064302	Clasp1	chr1:118389057-118389058	mouse	B2_Mm2_chr1:118311715-118311901	0.027987
ENSMUSG00000116838	RP24-75N14.5	chr17:3314184-3314185	mouse	B2_Mm2_chr17:6173450-6173567	0.027976
ENSMUSG00000032468	Armc8	chr9:99568898-99568899	mouse	B2_Mm2_chr9:99089606-99089794	0.027936
ENSMUSG00000022635	Zcrb1	chr15:93398333-93398334	mouse	B2_Mm2_chr15:93379354-93379518	0.027438
ENSMUSG00000036167	Pphln1	chr15:93398349-93398350	mouse	B2_Mm2_chr15:93379354-93379518	0.027438
ENSMUSG00000019471	Cdc37	chr9:21149981-21149982	mouse	B2_Mm2_chr9:21137136-21137222	0.027417
ENSMUSG00000047514	Tspyl1	chr10:34282189-34282190	mouse	B2_Mm2_chr10:34209801-34209981	0.027305
ENSMUSG00000034111	Tmed8	chr12:87200453-87200454	mouse	B2_Mm2_chr12:87406808-87406992	0.027123
ENSMUSG00000059325	Hopx	chr5:77115120-77115121	mouse	B2_Mm2_chr5:77252490-77252664	0.026962
ENSMUSG00000059714	Flot1	chr17:35823229-35823230	mouse	B2_Mm2_chr17:35740217-35740401	0.026812
ENSMUSG00000092511	RP24-317H19.10	chr17:34882041-34882042	mouse	B2_Mm2_chr17:34952918-34953069	0.026699
ENSMUSG00000025492	Ifitm3	chr7:141010769-141010770	mouse	B2_Mm2_chr7:141021963-141022013	0.02658
ENSMUSG00000050737	Ptges	chr2:30929862-30929863	mouse	B2_Mm2_chr2:30934054-30934238	0.026423
ENSMUSG00000039804	Ncoa5	chr2:165034866-165034867	mouse	B2_Mm2_chr2:165027468-165027652	0.026253
ENSMUSG00000002028	Kmt2a	chr9:44881295-44881296	mouse	B2_Mm2_chr9:44919669-44919853	0.026056
ENSMUSG00000037020	Wdr62	chr7:30280418-30280419	mouse	B2_Mm2_chr7:30412448-30412636	0.025719
ENSMUSG00000023991	Foxp4	chr17:47924644-47924645	mouse	B2_Mm2_chr17:47900509-47900684	0.025718
ENSMUSG00000097799	Gm26899	chr2:120532903-120532904	mouse	B2_Mm2_chr2:120575771-120575953	0.025715
ENSMUSG00000108024	RP24-430K15.4	chr6:113689854-113689855	mouse	B2_Mm2_chr6:113663382-113663419	0.025678
ENSMUSG00000029861	Fam131b	chr6:42324642-42324643	mouse	B2_Mm2_chr6:42338693-42338886	0.025607
ENSMUSG00000029415	Sdad1	chr5:92310478-92310479	mouse	B2_Mm2_chr5:92279606-92279780	0.025472
ENSMUSG00000027884	Clcc1	chr3:108653912-108653913	mouse	B2_Mm2_chr3:108657649-108657821	0.025361
ENSMUSG00000025058	RP23-311G7.1	chrX:85870353-85870354	mouse	B2_Mm2_chrX:85771261-85771292	0.025329
ENSMUSG00000035929	H2-Q4	chr17:35379616-35379617	mouse	B2_Mm2_chr17:35259108-35259180	0.025167
ENSMUSG00000006095	Tbcb	chr7:30232271-30232272	mouse	B2_Mm2_chr7:30412448-30412636	0.025162
ENSMUSG00000019738	Polr2i	chr7:30231947-30231948	mouse	B2_Mm2_chr7:30412448-30412636	0.025161
ENSMUSG00000087541	Hopxos	chr5:77094531-77094532	mouse	B2_Mm2_chr5:77252490-77252664	0.025107
ENSMUSG00000027425	Csrp2bp	chr2:144368982-144368983	mouse	B2_Mm2_chr2:144338121-144338156	0.024954
ENSMUSG00000098387	Pet117	chr2:144368995-144368996	mouse	B2_Mm2_chr2:144338121-144338156	0.024954
ENSMUSG00000097479	Gm26582	chr5:92043063-92043064	mouse	B2_Mm2_chr5:92107216-92107402	0.024941
ENSMUSG00000028657	Ppt1	chr4:122836241-122836242	mouse	B2_Mm2_chr4:122860243-122860391	0.024846
ENSMUSG00000033450	Tagap	chr17:7925999-7926000	mouse	B2_Mm2_chr17:7937454-7937642	0.024746
ENSMUSG00000026664	Phyh	chr2:4919018-4919019	mouse	B2_Mm2_chr2:5012232-5012408	0.024671
ENSMUSG00000038784	Cnot4	chr6:35133723-35133724	mouse	B2_Mm2_chr6:35147946-35148131	0.024587
ENSMUSG00000072620	Slfn2	chr11:83065111-83065112	mouse	B2_Mm2_chr11:83039171-83039355	0.024507
ENSMUSG00000099104	RP23-376B1.4	chr17:8566949-8566950	mouse	B2_Mm2_chr17:8311505-8311702	0.024322
ENSMUSG00000061232	H2-K1	chr17:34000332-34000333	mouse	B2_Mm2_chr17:33969030-33969208	0.024261
ENSMUSG00000029050	Ski	chr4:155222591-155222592	mouse	B2_Mm2_chr4:155248498-155248526	0.024008
ENSMUSG00000107659	RP23-49L8.5	chr6:88503604-88503605	mouse	B2_Mm2_chr6:88904510-88904676	0.023907
ENSMUSG00000042744	AC126938.1	chr5:121220218-121220219	mouse	B2_Mm2_chr5:121389850-121390039	0.023864
ENSMUSG00000045795	Whamm	chr7:81571265-81571266	mouse	B2_Mm2_chr7:81762169-81762334	0.023798
ENSMUSG00000038167	Plekhg6	chr6:125380792-125380793	mouse	B2_Mm2_chr6:125366230-125366419	0.023641
ENSMUSG00000098445	Mir6972	chr17:34857631-34857632	mouse	B2_Mm2_chr17:34952918-34953069	0.023494
ENSMUSG00000004296	Il12b	chr11:44400062-44400063	mouse	B2_Mm2_chr11:45753141-45753308	0.023481
ENSMUSG00000029599	Ddx54	chr5:120612738-120612739	mouse	B2_Mm2_chr5:120517511-120517544	0.023248
ENSMUSG00000032939	Nup93	chr8:94214563-94214564	mouse	B2_Mm2_chr8:94174129-94174291	0.023244
ENSMUSG00000041598	Cdc42ep4	chr11:113751880-113751881	mouse	B2_Mm2_chr11:113815699-113815816	0.023229
ENSMUSG00000022136	Dnajc3	chr14:118937975-118937976	mouse	B2_Mm2_chr14:118690847-118691036	0.023212
ENSMUSG00000079505	RP23-331E12.9	chr17:35380291-35380292	mouse	B2_Mm2_chr17:35259108-35259180	0.023082
ENSMUSG00000007029	Vars	chr17:35000986-35000987	mouse	B2_Mm2_chr17:34952918-34953069	0.023011
ENSMUSG00000085667	RP23-13A13.4	chr4:131920028-131920029	mouse	B2_Mm2_chr4:132268963-132269143	0.022948
ENSMUSG00000070720	Tmem200b	chr4:131921770-131921771	mouse	B2_Mm2_chr4:132268963-132269143	0.022947
ENSMUSG00000018925	Heatr9	chr11:83522174-83522175	mouse	B2_Mm2_chr11:83663111-83663292	0.02275
ENSMUSG00000020326	Ccng1	chr11:40755310-40755311	mouse	B2_Mm2_chr11:40745909-40746102	0.022594
ENSMUSG00000029048	Rer1	chr4:155086381-155086382	mouse	B2_Mm2_chr4:155248498-155248526	0.022082
ENSMUSG00000103435	RP23-440J24.2	chr1:176754516-176754517	mouse	B2_Mm2_chr1:175626089-175626272	0.021928
ENSMUSG00000067212	H2-T23	chr17:36032854-36032855	mouse	B2_Mm2_chr17:35999636-35999726	0.021784
ENSMUSG00000066043	Phactr4	chr4:132422488-132422489	mouse	B2_Mm2_chr4:132268963-132269143	0.021296
ENSMUSG00000029817	Tra2a	chr6:49264032-49264033	mouse	B2_Mm2_chr6:49073355-49073520	0.021166
ENSMUSG00000026662	Sephs1	chr2:4881563-4881564	mouse	B2_Mm2_chr2:5012232-5012408	0.021072
ENSMUSG00000027667	Zfp639	chr3:32510258-32510259	mouse	B2_Mm2_chr3:32421373-32421421	0.021034
ENSMUSG00000018293	Pfn1	chr11:70654643-70654644	mouse	B2_Mm2_chr11:70720389-70720494	0.021026
ENSMUSG00000108112	RP24-491O6.1	chr6:57485120-57485121	mouse	B2_Mm2_chr6:57581896-57581921	0.021008
ENSMUSG00000038848	Ythdf1	chr2:180920948-180920949	mouse	B2_Mm2_chr2:180902177-180902339	0.02097
ENSMUSG00000020088	Sar1a	chr10:61680298-61680299	mouse	B2_Mm2_chr10:61670913-61671043	0.020819
ENSMUSG00000099311	Mir6244	chr9:52115622-52115623	mouse	B2_Mm2_chr9:52134735-52134899	0.020796
ENSMUSG00000085684	RP23-73A4.3	chr11:34098553-34098554	mouse	B2_Mm2_chr11:34094647-34094818	0.020795
ENSMUSG00000064181	Rab3ip	chr10:116950768-116950769	mouse	B2_Mm2_chr10:116944260-116944439	0.020771
ENSMUSG00000094365	RP23-72M20.2	chr7:30664936-30664937	mouse	B2_Mm2_chr7:30412448-30412636	0.020698
ENSMUSG00000029614	Rpl6	chr5:121204480-121204481	mouse	B2_Mm2_chr5:121389850-121390039	0.020075
ENSMUSG00000026421	Csrp1	chr1:135720060-135720061	mouse	B2_Mm2_chr1:135740483-135740665	0.019939
ENSMUSG00000111361	RP24-511J14.2	chr10:34179927-34179928	mouse	B2_Mm2_chr10:34209801-34209981	0.019929
ENSMUSG00000090936	RP23-115O3.19	chr17:35165118-35165119	mouse	B2_Mm2_chr17:35185761-35185930	0.019875
ENSMUSG00000029860	Zyx	chr6:42349629-42349630	mouse	B2_Mm2_chr6:42338693-42338886	0.019756
ENSMUSG00000025630	Hprt	chrX:52988136-52988137	mouse	B2_Mm2_chrX:52928972-52929150	0.01961
ENSMUSG00000079492	RP23-108F2.19	chr17:36058370-36058371	mouse	B2_Mm2_chr17:35999636-35999726	0.019503
ENSMUSG00000090069	RP23-17J18.2	chr17:7946425-7946426	mouse	B2_Mm2_chr17:7937454-7937642	0.018757
ENSMUSG00000024429	Gnl1	chr17:35979850-35979851	mouse	B2_Mm2_chr17:35999636-35999726	0.018678
ENSMUSG00000078427	Sarnp	chr10:128817332-128817333	mouse	B2_Mm2_chr10:128823190-128823380	0.018541
ENSMUSG00000081650	RP23-115O3.2	chr17:35220833-35220834	mouse	B2_Mm2_chr17:35185761-35185930	0.018441
ENSMUSG00000034826	Nup54	chr5:92435218-92435219	mouse	B2_Mm2_chr5:92279606-92279780	0.018292
ENSMUSG00000098609	Anxa11os	chr14:25870265-25870266	mouse	B2_Mm2_chr14:25830167-25830356	0.018276
ENSMUSG00000073405	RP23-108F2.8	chr17:36111657-36111658	mouse	B2_Mm2_chr17:35999636-35999726	0.018258
ENSMUSG00000045394	Epcam	chr17:87635978-87635979	mouse	B2_Mm2_chr17:88551355-88551540	0.018216
ENSMUSG00000097006	RP23-201I4.11	chr17:23743233-23743234	mouse	B2_Mm2_chr17:23754991-23755184	0.018195
ENSMUSG00000045672	Col27a1	chr4:63214003-63214004	mouse	B2_Mm2_chr4:62407240-62407421	0.018179
ENSMUSG00000108738	RP23-335G1.1	chr7:116334254-116334255	mouse	B2_Mm2_chr7:116491619-116491798	0.018025
ENSMUSG00000097737	Gm26530	chr3:116488965-116488966	mouse	B2_Mm2_chr3:116495390-116495585	0.018019
ENSMUSG00000021143	Pacs2	chr12:113014507-113014508	mouse	B2_Mm2_chr12:112991021-112991212	0.017978
ENSMUSG00000024778	Fas	chr19:34290658-34290659	mouse	B2_Mm2_chr19:34471720-34471895	0.01791
ENSMUSG00000024213	Nudt3	chr17:27623494-27623495	mouse	B2_Mm2_chr17:27826636-27826802	0.017777
ENSMUSG00000034842	Art3	chr5:92331826-92331827	mouse	B2_Mm2_chr5:92279606-92279780	0.017626
ENSMUSG00000112093	RP23-168F21.3	chr12:80790342-80790343	mouse	B2_Mm2_chr12:80818749-80818937	0.017513
ENSMUSG00000039813	Tbc1d2	chr4:46650208-46650209	mouse	B2_Mm2_chr4:46617477-46617651	0.017375
ENSMUSG00000030397	Mark4	chr7:19458820-19458821	mouse	B2_Mm2_chr7:19500225-19500358	0.017326
ENSMUSG00000104391	RP23-268A12.1	chr1:177036935-177036936	mouse	B2_Mm2_chr1:175626089-175626272	0.017106
ENSMUSG00000040843	Tiprl	chr1:165236995-165236996	mouse	B2_Mm2_chr1:165229925-165230110	0.017007
ENSMUSG00000020271	Fbxw11	chr11:32642723-32642724	mouse	B2_Mm2_chr11:32619925-32620096	0.016996
ENSMUSG00000000738	Spg7	chr8:123062941-123062942	mouse	B2_Mm2_chr8:123044429-123044600	0.016847
ENSMUSG00000024816	Frmd8	chr19:5875273-5875274	mouse	B2_Mm2_chr19:5786990-5787151	0.016823
ENSMUSG00000040482	Dxo	chr17:34837018-34837019	mouse	B2_Mm2_chr17:34952918-34953069	0.016738
ENSMUSG00000061207	Stk19	chr17:34836944-34836945	mouse	B2_Mm2_chr17:34952918-34953069	0.016738
ENSMUSG00000043019	Edem3	chr1:151755370-151755371	mouse	B2_Mm2_chr1:151803710-151803899	0.016664
ENSMUSG00000049872	Fam26e	chr10:34096518-34096519	mouse	B2_Mm2_chr10:34209801-34209981	0.016572
ENSMUSG00000028656	Cap1	chr4:122886055-122886056	mouse	B2_Mm2_chr4:122860243-122860391	0.016549
ENSMUSG00000030232	Aebp2	chr6:140622662-140622663	mouse	B2_Mm2_chr6:140600805-140600983	0.016536
ENSMUSG00000004936	Map2k1	chr9:64253630-64253631	mouse	B2_Mm2_chr9:64103660-64103833	0.016529
ENSMUSG00000029993	Nfu1	chr6:87009235-87009236	mouse	B2_Mm2_chr6:86773134-86773210	0.016508
ENSMUSG00000071072	Ptges3	chr10:128058953-128058954	mouse	B2_Mm2_chr10:128080623-128080813	0.016504
ENSMUSG00000029992	Gfpt1	chr6:87042845-87042846	mouse	B2_Mm2_chr6:86773134-86773210	0.016475
ENSMUSG00000108436	RP23-137A24.6	chr7:80404268-80404269	mouse	B2_Mm2_chr7:80555238-80555394	0.016429
ENSMUSG00000002881	Nab1	chr1:52500678-52500679	mouse	B2_Mm2_chr1:52765539-52765685	0.016343
ENSMUSG00000026797	Stxbp1	chr2:32847244-32847245	mouse	B2_Mm2_chr2:32882141-32882313	0.016295
ENSMUSG00000046808	Atp10d	chr5:72203328-72203329	mouse	B2_Mm2_chr5:72551490-72551670	0.01629
ENSMUSG00000090194	AC155287.2	chr6:113276929-113276930	mouse	B2_Mm2_chr6:113296697-113296868	0.016215
ENSMUSG00000024833	Pola2	chr19:5964205-5964206	mouse	B2_Mm2_chr19:6018525-6018714	0.016152
ENSMUSG00000027641	Rbl1	chr2:157204533-157204534	mouse	B2_Mm2_chr2:157142214-157142364	0.016068
ENSMUSG00000000861	Bcl11a	chr11:24078055-24078056	mouse	B2_Mm2_chr11:26602183-26602339	0.016032
ENSMUSG00000007036	Abhd16a	chr17:35089262-35089263	mouse	B2_Mm2_chr17:34952918-34953069	0.015899
ENSMUSG00000095609	RP24-482L4.3	chr13:120052193-120052194	mouse	B2_Mm2_chr13:117223074-117223264	0.015824
ENSMUSG00000043153	Ispd	chr12:36381449-36381450	mouse	B2_Mm2_chr12:36037000-36037062	0.015726
ENSMUSG00000055200	Sertad3	chr7:27473767-27473768	mouse	B2_Mm2_chr7:27590903-27591068	0.015587
ENSMUSG00000034484	Snx2	chr18:53176364-53176365	mouse	B2_Mm2_chr18:53144758-53144947	0.015586
ENSMUSG00000017776	Crk	chr11:75679258-75679259	mouse	B2_Mm2_chr11:75669417-75669600	0.015575
ENSMUSG00000010205	Raver1	chr9:21092007-21092008	mouse	B2_Mm2_chr9:21137136-21137222	0.015525
ENSMUSG00000111497	RP23-186O3.11	chr9:21091996-21091997	mouse	B2_Mm2_chr9:21137136-21137222	0.015525
ENSMUSG00000020919	Stat5b	chr11:100850723-100850724	mouse	B2_Mm2_chr11:100702548-100702730	0.01551
ENSMUSG00000053835	H2-T24	chr17:36020559-36020560	mouse	B2_Mm2_chr17:35999636-35999726	0.015487
ENSMUSG00000029859	Epha1	chr6:42373267-42373268	mouse	B2_Mm2_chr6:42338693-42338886	0.01547
ENSMUSG00000030602	Pak4	chr7:28598184-28598185	mouse	B2_Mm2_chr7:30412448-30412636	0.015435
ENSMUSG00000109336	Samd4b	chr7:28598143-28598144	mouse	B2_Mm2_chr7:30412448-30412636	0.015435
ENSMUSG00000051314	Ffar2	chr7:30823774-30823775	mouse	B2_Mm2_chr7:30412448-30412636	0.015422
ENSMUSG00000036634	Mag	chr7:30914872-30914873	mouse	B2_Mm2_chr7:30412448-30412636	0.015349
ENSMUSG00000073418	C4b	chr17:34743881-34743882	mouse	B2_Mm2_chr17:34952918-34953069	0.015328
ENSMUSG00000099329	RP24-271E12.4	chr17:29549798-29549799	mouse	B2_Mm2_chr17:29498400-29498553	0.015194
ENSMUSG00000035852	Misp	chr10:79820988-79820989	mouse	B2_Mm2_chr10:79817218-79817403	0.015056
ENSMUSG00000082321	RP24-114E18.6	chr2:156347839-156347840	mouse	B2_Mm2_chr2:156352699-156352888	0.014958
ENSMUSG00000025491	Ifitm1	chr7:140967220-140967221	mouse	B2_Mm2_chr7:141021963-141022013	0.014851
ENSMUSG00000092224	RP23-108F2.21	chr17:36096804-36096805	mouse	B2_Mm2_chr17:36218321-36218509	0.014791
ENSMUSG00000022204	Ngdn	chr14:55015453-55015454	mouse	B2_Mm2_chr14:55038734-55038886	0.014728
ENSMUSG00000026425	Srgap2	chr1:131527351-131527352	mouse	B2_Mm2_chr1:131474631-131474803	0.014628
ENSMUSG00000055184	Fam72a	chr1:131527902-131527903	mouse	B2_Mm2_chr1:131474631-131474803	0.014628
ENSMUSG00000047798	Cd300lf	chr11:115133991-115133992	mouse	B2_Mm2_chr11:115080395-115080583	0.014586
ENSMUSG00000024970	Spindoc	chr19:7383025-7383026	mouse	B2_Mm2_chr19:7368614-7368806	0.014519
ENSMUSG00000051124	Gimap9	chr6:48676128-48676129	mouse	B2_Mm2_chr6:49073355-49073520	0.014501
ENSMUSG00000004043	Stat5a	chr11:100859350-100859351	mouse	B2_Mm2_chr11:100702548-100702730	0.014453
ENSMUSG00000059208	Hnrnpm	chr17:33686859-33686860	mouse	B2_Mm2_chr17:33656893-33657075	0.014399
ENSMUSG00000114871	RP24-482L4.5	chr13:120015971-120015972	mouse	B2_Mm2_chr13:117223074-117223264	0.014393
ENSMUSG00000006134	Crkl	chr16:17451986-17451987	mouse	B2_Mm2_chr16:17432655-17432825	0.014385
ENSMUSG00000029862	Clcn1	chr6:42286684-42286685	mouse	B2_Mm2_chr6:42338693-42338886	0.014206
ENSMUSG00000037096	RP23-192D6.1	chr3:78966798-78966799	mouse	B2_Mm2_chr3:79172043-79172100	0.014163
ENSMUSG00000047417	Rexo1	chr10:80561559-80561560	mouse	B2_Mm2_chr10:80751200-80751354	0.014157
ENSMUSG00000097819	RP24-421H8.1	chr1:59492604-59492605	mouse	B2_Mm2_chr1:59608827-59608999	0.01412
ENSMUSG00000021377	Dek	chr13:47106200-47106201	mouse	B2_Mm2_chr13:47081043-47081222	0.014106
ENSMUSG00000024083	Pja2	chr17:64331915-64331916	mouse	B2_Mm2_chr17:64471297-64471408	0.014076
ENSMUSG00000050002	Idnk	chr13:58157648-58157649	mouse	B2_Mm2_chr13:58149036-58149202	0.01395
ENSMUSG00000073402	RP23-108F2.1	chr17:36168536-36168537	mouse	B2_Mm2_chr17:36218321-36218509	0.013875
ENSMUSG00000070493	Chchd2	chr5:129887469-129887470	mouse	B2_Mm2_chr5:129924732-129924884	0.013846
ENSMUSG00000022765	Snap29	chr16:17405985-17405986	mouse	B2_Mm2_chr16:17432655-17432825	0.013811
ENSMUSG00000041720	Pi4ka	chr16:17406313-17406314	mouse	B2_Mm2_chr16:17432655-17432825	0.013811
ENSMUSG00000027936	Crtc2	chr3:90254162-90254163	mouse	B2_Mm2_chr3:90215974-90216162	0.013735
ENSMUSG00000109428	RP24-225H21.2	chr7:81590893-81590894	mouse	B2_Mm2_chr7:81762169-81762334	0.013672
ENSMUSG00000101867	RP23-269E5.14	chr9:96024739-96024740	mouse	B2_Mm2_chr9:99089606-99089794	0.013611
ENSMUSG00000025958	Creb1	chr1:64532644-64532645	mouse	B2_Mm2_chr1:64543844-64544021	0.013581
ENSMUSG00000045282	Tmem86b	chr7:4631421-4631422	mouse	B2_Mm2_chr7:4865130-4865296	0.013575
ENSMUSG00000108033	RP23-329D23.8	chr6:42350861-42350862	mouse	B2_Mm2_chr6:42338693-42338886	0.013557
ENSMUSG00000086767	RP23-169H13.2	chr4:149904005-149904006	mouse	B2_Mm2_chr4:150549067-150549219	0.013513
ENSMUSG00000023186	Vwa5a	chr9:38718267-38718268	mouse	B2_Mm2_chr9:37247796-37247972	0.01351
ENSMUSG00000089781	RP24-457L7.2	chr6:90599947-90599948	mouse	B2_Mm2_chr6:88904510-88904676	0.013503
ENSMUSG00000107168	RP23-463H10.1	chr5:36618700-36618701	mouse	B2_Mm2_chr5:36676755-36676941	0.013442
ENSMUSG00000050017	Pitpnb	chr5:111330762-111330763	mouse	B2_Mm2_chr5:110231636-110231742	0.013385
ENSMUSG00000047963	Stbd1	chr5:92603040-92603041	mouse	B2_Mm2_chr5:92279606-92279780	0.0133
ENSMUSG00000034575	Papd7	chr13:69534616-69534617	mouse	B2_Mm2_chr13:69509735-69509881	0.013298
ENSMUSG00000084998	RP24-180B11.7	chr17:35896945-35896946	mouse	B2_Mm2_chr17:35740217-35740401	0.01325
ENSMUSG00000078920	Ifi47	chr11:49076586-49076587	mouse	B2_Mm2_chr11:49068200-49068381	0.013245
ENSMUSG00000078812	Eif5a	chr11:69921957-69921958	mouse	B2_Mm2_chr11:69663102-69663225	0.01322
ENSMUSG00000085725	AC161218.5	chr7:4526535-4526536	mouse	B2_Mm2_chr7:4409860-4409955	0.013176
ENSMUSG00000040078	RP23-448G18.2	chr6:85843979-85843980	mouse	B2_Mm2_chr6:86773134-86773210	0.013134
ENSMUSG00000023008	Fmnl3	chr15:99370481-99370482	mouse	B2_Mm2_chr15:99350592-99350782	0.013096
ENSMUSG00000031168	Ebp	chrX:8193511-8193512	mouse	B2_Mm2_chrX:8091196-8091373	0.013041
ENSMUSG00000071862	Lrrtm2	chr18:35215023-35215024	mouse	B2_Mm2_chr18:35709238-35709374	0.012966
ENSMUSG00000086347	RP23-328K2.4	chr11:101457389-101457390	mouse	B2_Mm2_chr11:101627708-101627786	0.012817
ENSMUSG00000030530	Furin	chr7:80405435-80405436	mouse	B2_Mm2_chr7:80555238-80555394	0.012756
ENSMUSG00000018199	Trove2	chr1:143777067-143777068	mouse	B2_Mm2_chr1:143764554-143764745	0.012733
ENSMUSG00000048905	RP24-318I24.1	chr17:28915323-28915324	mouse	B2_Mm2_chr17:27826636-27826802	0.01271
ENSMUSG00000042225	Ammecr1	chrX:142966727-142966728	mouse	B2_Mm2_chrX:142827749-142827904	0.012708
ENSMUSG00000086327	Slfn5os	chr11:82960680-82960681	mouse	B2_Mm2_chr11:83039171-83039355	0.012637
ENSMUSG00000050493	Fam167b	chr4:129578548-129578549	mouse	B2_Mm2_chr4:129789355-129789375	0.012628
ENSMUSG00000021725	Parp8	chr13:117025536-117025537	mouse	B2_Mm2_chr13:117223074-117223264	0.012622
ENSMUSG00000048118	Arid4a	chr12:71015989-71015990	mouse	B2_Mm2_chr12:71051286-71051462	0.012621
ENSMUSG00000042404	Dennd4b	chr3:90265184-90265185	mouse	B2_Mm2_chr3:90215974-90216162	0.012544
ENSMUSG00000035458	Tnni3	chr7:4524228-4524229	mouse	B2_Mm2_chr7:4409860-4409955	0.012524
ENSMUSG00000039048	Foxred1	chr9:35211054-35211055	mouse	B2_Mm2_chr9:37247796-37247972	0.012516
ENSMUSG00000021638	Ocln	chr13:100552717-100552718	mouse	B2_Mm2_chr13:100642475-100642648	0.012494
ENSMUSG00000052310	Slc39a1	chr3:90248171-90248172	mouse	B2_Mm2_chr3:90215974-90216162	0.012459
ENSMUSG00000030717	Nupr1	chr7:126630860-126630861	mouse	B2_Mm2_chr7:126643381-126643547	0.012377
ENSMUSG00000063317	Usp31	chr7:121707252-121707253	mouse	B2_Mm2_chr7:121072407-121072593	0.012338
ENSMUSG00000062031	Athl1	chr7:140941390-140941391	mouse	B2_Mm2_chr7:141021963-141022013	0.012233
ENSMUSG00000111394	RP23-320D23.6	chr9:59672813-59672814	mouse	B2_Mm2_chr9:59633843-59634040	0.01222
ENSMUSG00000039953	Clstn1	chr4:149586467-149586468	mouse	B2_Mm2_chr4:150549067-150549219	0.012196
ENSMUSG00000079677	Fdx1l	chr9:21073613-21073614	mouse	B2_Mm2_chr9:21137136-21137222	0.012193
ENSMUSG00000111692	RP23-186O3.13	chr9:21073095-21073096	mouse	B2_Mm2_chr9:21137136-21137222	0.012193
ENSMUSG00000028911	Srsf4	chr4:131873616-131873617	mouse	B2_Mm2_chr4:132268963-132269143	0.012151
ENSMUSG00000001156	Mxd1	chr6:86669160-86669161	mouse	B2_Mm2_chr6:86773134-86773210	0.01201
ENSMUSG00000108291	RP23-20K24.9	chr6:86665550-86665551	mouse	B2_Mm2_chr6:86773134-86773210	0.01201
ENSMUSG00000025877	Hk3	chr13:55021384-55021385	mouse	B2_Mm2_chr13:55041759-55041924	0.011999
ENSMUSG00000019461	Plscr3	chr11:69846375-69846376	mouse	B2_Mm2_chr11:69663102-69663225	0.011968
ENSMUSG00000079491	H2-T10	chr17:36121464-36121465	mouse	B2_Mm2_chr17:36218321-36218509	0.011962
ENSMUSG00000105918	Gm47278	chr7:127490841-127490842	mouse	B2_Mm2_chr7:127498514-127498683	0.011953
ENSMUSG00000024807	Syvn1	chr19:6046575-6046576	mouse	B2_Mm2_chr19:6018525-6018714	0.011946
ENSMUSG00000020415	Pttg1	chr11:43426250-43426251	mouse	B2_Mm2_chr11:45753141-45753308	0.011895
ENSMUSG00000060550	H2-Q7	chr17:35439154-35439155	mouse	B2_Mm2_chr17:35259108-35259180	0.011817
ENSMUSG00000020869	Lrrc59	chr11:94629766-94629767	mouse	B2_Mm2_chr11:94610851-94610888	0.011745
ENSMUSG00000027669	Gnb4	chr3:32616584-32616585	mouse	B2_Mm2_chr3:32421373-32421421	0.011725
ENSMUSG00000034266	Batf	chr12:85686668-85686669	mouse	B2_Mm2_chr12:87406808-87406992	0.011652
ENSMUSG00000022797	Tfrc	chr16:32608919-32608920	mouse	B2_Mm2_chr16:32613743-32613938	0.011638
ENSMUSG00000104559	RP23-131F7.5	chr5:111388288-111388289	mouse	B2_Mm2_chr5:110231636-110231742	0.011614
ENSMUSG00000039754	Alkbh4	chr5:136136145-136136146	mouse	B2_Mm2_chr5:136173436-136173466	0.011575
ENSMUSG00000034947	Tmem106a	chr11:101582241-101582242	mouse	B2_Mm2_chr11:101627708-101627786	0.011537
ENSMUSG00000035297	Cops4	chr5:100518308-100518309	mouse	B2_Mm2_chr5:100663941-100664096	0.011458
ENSMUSG00000035011	Zbtb7a	chr10:81135219-81135220	mouse	B2_Mm2_chr10:80751200-80751354	0.01145
ENSMUSG00000025790	Slco3a1	chr7:74554779-74554780	mouse	B2_Mm2_chr7:74703605-74703788	0.011376
ENSMUSG00000025019	Lcor	chr19:41482644-41482645	mouse	B2_Mm2_chr19:41334772-41334787	0.011281
ENSMUSG00000078763	Slfn1	chr11:83116848-83116849	mouse	B2_Mm2_chr11:83039171-83039355	0.011274
ENSMUSG00000024360	Etf1	chr18:34932006-34932007	mouse	B2_Mm2_chr18:35709238-35709374	0.011269
ENSMUSG00000069793	Slfn9	chr11:82991829-82991830	mouse	B2_Mm2_chr11:83039171-83039355	0.011199
ENSMUSG00000025809	Itgb1	chr8:128685653-128685654	mouse	B2_Mm2_chr8:128652813-128652967	0.011134
ENSMUSG00000046722	Cdc42se1	chr3:95228731-95228732	mouse	B2_Mm2_chr3:95311218-95311407	0.011078
ENSMUSG00000030340	Scnn1a	chr6:125320658-125320659	mouse	B2_Mm2_chr6:125471804-125471868	0.01105
ENSMUSG00000033294	Noc4l	chr5:110653416-110653417	mouse	B2_Mm2_chr5:110231636-110231742	0.01104
ENSMUSG00000029178	Klf3	chr5:64803387-64803388	mouse	B2_Mm2_chr5:64856567-64856771	0.010931
ENSMUSG00000016559	H3f3b	chr11:116027961-116027962	mouse	B2_Mm2_chr11:116096114-116096307	0.010899
ENSMUSG00000048731	Ggnbp1	chr17:26973216-26973217	mouse	B2_Mm2_chr17:27826636-27826802	0.010882
ENSMUSG00000031153	Gripap1	chrX:7789764-7789765	mouse	B2_Mm2_chrX:7801916-7802024	0.010865
ENSMUSG00000022009	Nufip1	chr14:76110890-76110891	mouse	B2_Mm2_chr14:76093544-76093733	0.010845
ENSMUSG00000029190	AC167815.1	chr5:36696023-36696024	mouse	B2_Mm2_chr5:36676755-36676941	0.010789
ENSMUSG00000024235	Map3k8	chr18:4353014-4353015	mouse	B2_Mm2_chr18:4279700-4279883	0.010787
ENSMUSG00000108064	RP23-4F16.11	chr6:87799226-87799227	mouse	B2_Mm2_chr6:86773134-86773210	0.010684
ENSMUSG00000041926	Rnpep	chr1:135284083-135284084	mouse	B2_Mm2_chr1:135269090-135269278	0.010665
ENSMUSG00000035325	Sec31a	chr5:100416233-100416234	mouse	B2_Mm2_chr5:100663941-100664096	0.010611
ENSMUSG00000079014	Serpina3i	chr12:104263121-104263122	mouse	B2_Mm2_chr12:104742467-104742646	0.010529
ENSMUSG00000008200	Fnbp4	chr2:90745369-90745370	mouse	B2_Mm2_chr2:90738640-90738806	0.010467
ENSMUSG00000068417	Pnp2	chr14:50955991-50955992	mouse	B2_Mm2_chr14:50803071-50803209	0.010377
ENSMUSG00000078153	Psme2b	chr11:48946189-48946190	mouse	B2_Mm2_chr11:48863104-48863181	0.010374
ENSMUSG00000020863	Luc7l3	chr11:94321987-94321988	mouse	B2_Mm2_chr11:94311208-94311230	0.010317
ENSMUSG00000034459	Ifit1	chr19:34640870-34640871	mouse	B2_Mm2_chr19:34471720-34471895	0.010297
ENSMUSG00000021091	Serpina3n	chr12:104406728-104406729	mouse	B2_Mm2_chr12:104742467-104742646	0.010288
ENSMUSG00000058207	Serpina3k	chr12:104338485-104338486	mouse	B2_Mm2_chr12:104742467-104742646	0.010281
ENSMUSG00000025876	Unc5a	chr13:54949410-54949411	mouse	B2_Mm2_chr13:55041759-55041924	0.01023
ENSMUSG00000097535	RP23-110E20.7	chr9:21037781-21037782	mouse	B2_Mm2_chr9:21137136-21137222	0.010196
ENSMUSG00000029617	Ccz1	chr5:144014876-144014877	mouse	B2_Mm2_chr5:142895733-142895818	0.010188
ENSMUSG00000024145	Pigf	chr17:87025405-87025406	mouse	B2_Mm2_chr17:86918888-86919074	0.010119
ENSMUSG00000024146	Cript	chr17:87025549-87025550	mouse	B2_Mm2_chr17:86918888-86919074	0.010119
ENSMUSG00000095834	RP24-334F11.3	chr16:3730509-3730510	mouse	B2_Mm2_chr16:4004067-4004218	0.010052

## Sheet: B2 near mouse-specific ISG GO
source	term_name	term_id	adjusted_p_value	negative_log10_of_adjusted_p_value	term_size	query_size	intersection_size	effective_domain_size	intersections
GO:MF	protein binding	GO:0005515	8.58382e-07	6.06632	10491	318	185	25177	ENSMUSG00000066148,ENSMUSG00000026526,ENSMUSG00000056692,ENSMUSG00000029413,ENSMUSG00000090877,ENSMUSG00000020577,ENSMUSG00000018930,ENSMUSG00000036931,ENSMUSG00000024217,ENSMUSG00000061589,ENSMUSG00000025626,ENSMUSG00000020707,ENSMUSG00000029798,ENSMUSG00000041415,ENSMUSG00000025059,ENSMUSG00000029249,ENSMUSG00000006169,ENSMUSG00000029410,ENSMUSG00000031671,ENSMUSG00000002658,ENSMUSG00000032507,…
GO:MF	DNA-binding transcription factor binding	GO:0140297	1.93389e-06	5.71357	527	318	26	25177	ENSMUSG00000029413,ENSMUSG00000090877,ENSMUSG00000036931,ENSMUSG00000061589,ENSMUSG00000029249,ENSMUSG00000031671,ENSMUSG00000024349,ENSMUSG00000029580,ENSMUSG00000022255,ENSMUSG00000021039,ENSMUSG00000024218,ENSMUSG00000032187,ENSMUSG00000025332,ENSMUSG00000033933,ENSMUSG00000029050,ENSMUSG00000029599,ENSMUSG00000000861,ENSMUSG00000020919,ENSMUSG00000004043,ENSMUSG00000006134,ENSMUSG00000070493,…
GO:MF	transcription factor binding	GO:0008134	7.23898e-06	5.14032	643	318	28	25177	ENSMUSG00000029413,ENSMUSG00000090877,ENSMUSG00000036931,ENSMUSG00000061589,ENSMUSG00000029249,ENSMUSG00000031671,ENSMUSG00000002658,ENSMUSG00000024349,ENSMUSG00000029580,ENSMUSG00000022255,ENSMUSG00000021039,ENSMUSG00000024218,ENSMUSG00000032187,ENSMUSG00000040097,ENSMUSG00000025332,ENSMUSG00000033933,ENSMUSG00000029050,ENSMUSG00000029599,ENSMUSG00000000861,ENSMUSG00000020919,ENSMUSG00000004043,…
GO:MF	enzyme binding	GO:0019899	0.000150934	3.82121	2313	318	58	25177	ENSMUSG00000090877,ENSMUSG00000025626,ENSMUSG00000029410,ENSMUSG00000002658,ENSMUSG00000032507,ENSMUSG00000024349,ENSMUSG00000029580,ENSMUSG00000039512,ENSMUSG00000024942,ENSMUSG00000039678,ENSMUSG00000021039,ENSMUSG00000032187,ENSMUSG00000069874,ENSMUSG00000078853,ENSMUSG00000038587,ENSMUSG00000062352,ENSMUSG00000035242,ENSMUSG00000028790,ENSMUSG00000034330,ENSMUSG00000024824,ENSMUSG00000022257,…
GO:MF	protein-containing complex binding	GO:0044877	0.000242272	3.6157	1562	318	44	25177	ENSMUSG00000024217,ENSMUSG00000025626,ENSMUSG00000020707,ENSMUSG00000029249,ENSMUSG00000002658,ENSMUSG00000029500,ENSMUSG00000000555,ENSMUSG00000005299,ENSMUSG00000032187,ENSMUSG00000062352,ENSMUSG00000035242,ENSMUSG00000057367,ENSMUSG00000028790,ENSMUSG00000024339,ENSMUSG00000063273,ENSMUSG00000033933,ENSMUSG00000056116,ENSMUSG00000030082,ENSMUSG00000035929,ENSMUSG00000072620,ENSMUSG00000061232,…
GO:MF	binding	GO:0005488	0.000297276	3.52684	16296	318	246	25177	ENSMUSG00000066148,ENSMUSG00000026526,ENSMUSG00000056692,ENSMUSG00000029413,ENSMUSG00000090877,ENSMUSG00000021036,ENSMUSG00000020577,ENSMUSG00000018930,ENSMUSG00000036931,ENSMUSG00000024217,ENSMUSG00000061589,ENSMUSG00000025626,ENSMUSG00000020707,ENSMUSG00000029798,ENSMUSG00000041415,ENSMUSG00000037400,ENSMUSG00000035093,ENSMUSG00000025059,ENSMUSG00000029249,ENSMUSG00000026525,ENSMUSG00000006169,…
GO:MF	protein-folding chaperone binding	GO:0051087	0.000455481	3.34153	160	318	12	25177	ENSMUSG00000029410,ENSMUSG00000057367,ENSMUSG00000056116,ENSMUSG00000019471,ENSMUSG00000035929,ENSMUSG00000061232,ENSMUSG00000022136,ENSMUSG00000071072,ENSMUSG00000025958,ENSMUSG00000024807,ENSMUSG00000060550,ENSMUSG00000022797
GO:MF	RNA polymerase II-specific DNA-binding transcription factor binding	GO:0061629	0.000892743	3.04927	380	318	18	25177	ENSMUSG00000090877,ENSMUSG00000036931,ENSMUSG00000061589,ENSMUSG00000029249,ENSMUSG00000031671,ENSMUSG00000024349,ENSMUSG00000029580,ENSMUSG00000022255,ENSMUSG00000021039,ENSMUSG00000024218,ENSMUSG00000032187,ENSMUSG00000025332,ENSMUSG00000029599,ENSMUSG00000020919,ENSMUSG00000006134,ENSMUSG00000025958,ENSMUSG00000035011,ENSMUSG00000025019
GO:MF	TAP binding	GO:0046977	0.00193139	2.71413	20	318	5	25177	ENSMUSG00000024339,ENSMUSG00000056116,ENSMUSG00000035929,ENSMUSG00000061232,ENSMUSG00000060550
GO:MF	MHC class I protein binding	GO:0042288	0.00483855	2.31529	40	318	6	25177	ENSMUSG00000024339,ENSMUSG00000056116,ENSMUSG00000035929,ENSMUSG00000061232,ENSMUSG00000067212,ENSMUSG00000060550
GO:MF	beta-2-microglobulin binding	GO:0030881	0.00507975	2.29416	24	318	5	25177	ENSMUSG00000056116,ENSMUSG00000035929,ENSMUSG00000061232,ENSMUSG00000067212,ENSMUSG00000060550
GO:MF	ribonucleoprotein complex binding	GO:0043021	0.0106309	1.97343	183	318	11	25177	ENSMUSG00000024217,ENSMUSG00000025626,ENSMUSG00000020707,ENSMUSG00000005299,ENSMUSG00000063273,ENSMUSG00000030082,ENSMUSG00000072620,ENSMUSG00000038848,ENSMUSG00000078812,ENSMUSG00000020415,ENSMUSG00000078763
GO:MF	catalytic activity	GO:0003824	0.0130342	1.88492	5729	318	104	25177	ENSMUSG00000026526,ENSMUSG00000029413,ENSMUSG00000090877,ENSMUSG00000021036,ENSMUSG00000061589,ENSMUSG00000020707,ENSMUSG00000029798,ENSMUSG00000041415,ENSMUSG00000037400,ENSMUSG00000025059,ENSMUSG00000029410,ENSMUSG00000031671,ENSMUSG00000029500,ENSMUSG00000028788,ENSMUSG00000032849,ENSMUSG00000032462,ENSMUSG00000024349,ENSMUSG00000021583,ENSMUSG00000020397,ENSMUSG00000029580,ENSMUSG00000039497,…
GO:MF	T cell receptor binding	GO:0042608	0.0160053	1.79574	30	318	5	25177	ENSMUSG00000056116,ENSMUSG00000035929,ENSMUSG00000061232,ENSMUSG00000067212,ENSMUSG00000060550
GO:MF	MHC protein binding	GO:0042287	0.020204	1.69456	51	318	6	25177	ENSMUSG00000024339,ENSMUSG00000056116,ENSMUSG00000035929,ENSMUSG00000061232,ENSMUSG00000067212,ENSMUSG00000060550
GO:MF	kinase binding	GO:0019900	0.021717	1.6632	867	318	26	25177	ENSMUSG00000029410,ENSMUSG00000024349,ENSMUSG00000029580,ENSMUSG00000069874,ENSMUSG00000078853,ENSMUSG00000062352,ENSMUSG00000028790,ENSMUSG00000034330,ENSMUSG00000024824,ENSMUSG00000022257,ENSMUSG00000054855,ENSMUSG00000019471,ENSMUSG00000029050,ENSMUSG00000022136,ENSMUSG00000024778,ENSMUSG00000004936,ENSMUSG00000026797,ENSMUSG00000000861,ENSMUSG00000017776,ENSMUSG00000029859,ENSMUSG00000036634,…
GO:MF	natural killer cell lectin-like receptor binding	GO:0046703	0.0258416	1.58768	33	318	5	25177	ENSMUSG00000056116,ENSMUSG00000035929,ENSMUSG00000061232,ENSMUSG00000067212,ENSMUSG00000060550
GO:MF	protein kinase binding	GO:0019901	0.0270856	1.56726	777	318	24	25177	ENSMUSG00000029410,ENSMUSG00000024349,ENSMUSG00000029580,ENSMUSG00000069874,ENSMUSG00000078853,ENSMUSG00000062352,ENSMUSG00000028790,ENSMUSG00000034330,ENSMUSG00000024824,ENSMUSG00000054855,ENSMUSG00000019471,ENSMUSG00000029050,ENSMUSG00000022136,ENSMUSG00000004936,ENSMUSG00000026797,ENSMUSG00000000861,ENSMUSG00000017776,ENSMUSG00000029859,ENSMUSG00000036634,ENSMUSG00000006134,ENSMUSG00000024083,…
GO:MF	TAP2 binding	GO:0046979	0.0310497	1.50794	18	318	4	25177	ENSMUSG00000024339,ENSMUSG00000056116,ENSMUSG00000061232,ENSMUSG00000060550
GO:MF	ribosome binding	GO:0043022	0.0348683	1.45757	109	318	8	25177	ENSMUSG00000005299,ENSMUSG00000063273,ENSMUSG00000030082,ENSMUSG00000072620,ENSMUSG00000038848,ENSMUSG00000078812,ENSMUSG00000020415,ENSMUSG00000078763
GO:MF	TAP1 binding	GO:0046978	0.0389393	1.40961	19	318	4	25177	ENSMUSG00000024339,ENSMUSG00000056116,ENSMUSG00000061232,ENSMUSG00000060550
GO:MF	CD8 receptor binding	GO:0042610	0.0389393	1.40961	19	318	4	25177	ENSMUSG00000056116,ENSMUSG00000035929,ENSMUSG00000061232,ENSMUSG00000060550
GO:MF	peptide antigen binding	GO:0042605	0.0421668	1.37503	58	318	6	25177	ENSMUSG00000024339,ENSMUSG00000056116,ENSMUSG00000035929,ENSMUSG00000061232,ENSMUSG00000067212,ENSMUSG00000060550
GO:MF	protein binding	GO:0005515	8.58382e-07	6.06632	10491	318	185	25177	ENSMUSG00000066148,ENSMUSG00000026526,ENSMUSG00000056692,ENSMUSG00000029413,ENSMUSG00000090877,ENSMUSG00000020577,ENSMUSG00000018930,ENSMUSG00000036931,ENSMUSG00000024217,ENSMUSG00000061589,ENSMUSG00000025626,ENSMUSG00000020707,ENSMUSG00000029798,ENSMUSG00000041415,ENSMUSG00000025059,ENSMUSG00000029249,ENSMUSG00000006169,ENSMUSG00000029410,ENSMUSG00000031671,ENSMUSG00000002658,ENSMUSG00000032507,…
GO:MF	DNA-binding transcription factor binding	GO:0140297	1.93389e-06	5.71357	527	318	26	25177	ENSMUSG00000029413,ENSMUSG00000090877,ENSMUSG00000036931,ENSMUSG00000061589,ENSMUSG00000029249,ENSMUSG00000031671,ENSMUSG00000024349,ENSMUSG00000029580,ENSMUSG00000022255,ENSMUSG00000021039,ENSMUSG00000024218,ENSMUSG00000032187,ENSMUSG00000025332,ENSMUSG00000033933,ENSMUSG00000029050,ENSMUSG00000029599,ENSMUSG00000000861,ENSMUSG00000020919,ENSMUSG00000004043,ENSMUSG00000006134,ENSMUSG00000070493,…
GO:MF	transcription factor binding	GO:0008134	7.23898e-06	5.14032	643	318	28	25177	ENSMUSG00000029413,ENSMUSG00000090877,ENSMUSG00000036931,ENSMUSG00000061589,ENSMUSG00000029249,ENSMUSG00000031671,ENSMUSG00000002658,ENSMUSG00000024349,ENSMUSG00000029580,ENSMUSG00000022255,ENSMUSG00000021039,ENSMUSG00000024218,ENSMUSG00000032187,ENSMUSG00000040097,ENSMUSG00000025332,ENSMUSG00000033933,ENSMUSG00000029050,ENSMUSG00000029599,ENSMUSG00000000861,ENSMUSG00000020919,ENSMUSG00000004043,…
GO:MF	enzyme binding	GO:0019899	0.000150934	3.82121	2313	318	58	25177	ENSMUSG00000090877,ENSMUSG00000025626,ENSMUSG00000029410,ENSMUSG00000002658,ENSMUSG00000032507,ENSMUSG00000024349,ENSMUSG00000029580,ENSMUSG00000039512,ENSMUSG00000024942,ENSMUSG00000039678,ENSMUSG00000021039,ENSMUSG00000032187,ENSMUSG00000069874,ENSMUSG00000078853,ENSMUSG00000038587,ENSMUSG00000062352,ENSMUSG00000035242,ENSMUSG00000028790,ENSMUSG00000034330,ENSMUSG00000024824,ENSMUSG00000022257,…
GO:MF	protein-containing complex binding	GO:0044877	0.000242272	3.6157	1562	318	44	25177	ENSMUSG00000024217,ENSMUSG00000025626,ENSMUSG00000020707,ENSMUSG00000029249,ENSMUSG00000002658,ENSMUSG00000029500,ENSMUSG00000000555,ENSMUSG00000005299,ENSMUSG00000032187,ENSMUSG00000062352,ENSMUSG00000035242,ENSMUSG00000057367,ENSMUSG00000028790,ENSMUSG00000024339,ENSMUSG00000063273,ENSMUSG00000033933,ENSMUSG00000056116,ENSMUSG00000030082,ENSMUSG00000035929,ENSMUSG00000072620,ENSMUSG00000061232,…
GO:MF	binding	GO:0005488	0.000297276	3.52684	16296	318	246	25177	ENSMUSG00000066148,ENSMUSG00000026526,ENSMUSG00000056692,ENSMUSG00000029413,ENSMUSG00000090877,ENSMUSG00000021036,ENSMUSG00000020577,ENSMUSG00000018930,ENSMUSG00000036931,ENSMUSG00000024217,ENSMUSG00000061589,ENSMUSG00000025626,ENSMUSG00000020707,ENSMUSG00000029798,ENSMUSG00000041415,ENSMUSG00000037400,ENSMUSG00000035093,ENSMUSG00000025059,ENSMUSG00000029249,ENSMUSG00000026525,ENSMUSG00000006169,…
GO:MF	protein-folding chaperone binding	GO:0051087	0.000455481	3.34153	160	318	12	25177	ENSMUSG00000029410,ENSMUSG00000057367,ENSMUSG00000056116,ENSMUSG00000019471,ENSMUSG00000035929,ENSMUSG00000061232,ENSMUSG00000022136,ENSMUSG00000071072,ENSMUSG00000025958,ENSMUSG00000024807,ENSMUSG00000060550,ENSMUSG00000022797
GO:MF	RNA polymerase II-specific DNA-binding transcription factor binding	GO:0061629	0.000892743	3.04927	380	318	18	25177	ENSMUSG00000090877,ENSMUSG00000036931,ENSMUSG00000061589,ENSMUSG00000029249,ENSMUSG00000031671,ENSMUSG00000024349,ENSMUSG00000029580,ENSMUSG00000022255,ENSMUSG00000021039,ENSMUSG00000024218,ENSMUSG00000032187,ENSMUSG00000025332,ENSMUSG00000029599,ENSMUSG00000020919,ENSMUSG00000006134,ENSMUSG00000025958,ENSMUSG00000035011,ENSMUSG00000025019
GO:MF	TAP binding	GO:0046977	0.00193139	2.71413	20	318	5	25177	ENSMUSG00000024339,ENSMUSG00000056116,ENSMUSG00000035929,ENSMUSG00000061232,ENSMUSG00000060550
GO:MF	MHC class I protein binding	GO:0042288	0.00483855	2.31529	40	318	6	25177	ENSMUSG00000024339,ENSMUSG00000056116,ENSMUSG00000035929,ENSMUSG00000061232,ENSMUSG00000067212,ENSMUSG00000060550
GO:MF	beta-2-microglobulin binding	GO:0030881	0.00507975	2.29416	24	318	5	25177	ENSMUSG00000056116,ENSMUSG00000035929,ENSMUSG00000061232,ENSMUSG00000067212,ENSMUSG00000060550
GO:MF	ribonucleoprotein complex binding	GO:0043021	0.0106309	1.97343	183	318	11	25177	ENSMUSG00000024217,ENSMUSG00000025626,ENSMUSG00000020707,ENSMUSG00000005299,ENSMUSG00000063273,ENSMUSG00000030082,ENSMUSG00000072620,ENSMUSG00000038848,ENSMUSG00000078812,ENSMUSG00000020415,ENSMUSG00000078763
GO:MF	catalytic activity	GO:0003824	0.0130342	1.88492	5729	318	104	25177	ENSMUSG00000026526,ENSMUSG00000029413,ENSMUSG00000090877,ENSMUSG00000021036,ENSMUSG00000061589,ENSMUSG00000020707,ENSMUSG00000029798,ENSMUSG00000041415,ENSMUSG00000037400,ENSMUSG00000025059,ENSMUSG00000029410,ENSMUSG00000031671,ENSMUSG00000029500,ENSMUSG00000028788,ENSMUSG00000032849,ENSMUSG00000032462,ENSMUSG00000024349,ENSMUSG00000021583,ENSMUSG00000020397,ENSMUSG00000029580,ENSMUSG00000039497,…
GO:MF	T cell receptor binding	GO:0042608	0.0160053	1.79574	30	318	5	25177	ENSMUSG00000056116,ENSMUSG00000035929,ENSMUSG00000061232,ENSMUSG00000067212,ENSMUSG00000060550
GO:MF	MHC protein binding	GO:0042287	0.020204	1.69456	51	318	6	25177	ENSMUSG00000024339,ENSMUSG00000056116,ENSMUSG00000035929,ENSMUSG00000061232,ENSMUSG00000067212,ENSMUSG00000060550
GO:MF	kinase binding	GO:0019900	0.021717	1.6632	867	318	26	25177	ENSMUSG00000029410,ENSMUSG00000024349,ENSMUSG00000029580,ENSMUSG00000069874,ENSMUSG00000078853,ENSMUSG00000062352,ENSMUSG00000028790,ENSMUSG00000034330,ENSMUSG00000024824,ENSMUSG00000022257,ENSMUSG00000054855,ENSMUSG00000019471,ENSMUSG00000029050,ENSMUSG00000022136,ENSMUSG00000024778,ENSMUSG00000004936,ENSMUSG00000026797,ENSMUSG00000000861,ENSMUSG00000017776,ENSMUSG00000029859,ENSMUSG00000036634,…
GO:MF	natural killer cell lectin-like receptor binding	GO:0046703	0.0258416	1.58768	33	318	5	25177	ENSMUSG00000056116,ENSMUSG00000035929,ENSMUSG00000061232,ENSMUSG00000067212,ENSMUSG00000060550
GO:MF	protein kinase binding	GO:0019901	0.0270856	1.56726	777	318	24	25177	ENSMUSG00000029410,ENSMUSG00000024349,ENSMUSG00000029580,ENSMUSG00000069874,ENSMUSG00000078853,ENSMUSG00000062352,ENSMUSG00000028790,ENSMUSG00000034330,ENSMUSG00000024824,ENSMUSG00000054855,ENSMUSG00000019471,ENSMUSG00000029050,ENSMUSG00000022136,ENSMUSG00000004936,ENSMUSG00000026797,ENSMUSG00000000861,ENSMUSG00000017776,ENSMUSG00000029859,ENSMUSG00000036634,ENSMUSG00000006134,ENSMUSG00000024083,…
GO:MF	TAP2 binding	GO:0046979	0.0310497	1.50794	18	318	4	25177	ENSMUSG00000024339,ENSMUSG00000056116,ENSMUSG00000061232,ENSMUSG00000060550
GO:MF	ribosome binding	GO:0043022	0.0348683	1.45757	109	318	8	25177	ENSMUSG00000005299,ENSMUSG00000063273,ENSMUSG00000030082,ENSMUSG00000072620,ENSMUSG00000038848,ENSMUSG00000078812,ENSMUSG00000020415,ENSMUSG00000078763
GO:MF	TAP1 binding	GO:0046978	0.0389393	1.40961	19	318	4	25177	ENSMUSG00000024339,ENSMUSG00000056116,ENSMUSG00000061232,ENSMUSG00000060550
GO:MF	CD8 receptor binding	GO:0042610	0.0389393	1.40961	19	318	4	25177	ENSMUSG00000056116,ENSMUSG00000035929,ENSMUSG00000061232,ENSMUSG00000060550
GO:MF	peptide antigen binding	GO:0042605	0.0421668	1.37503	58	318	6	25177	ENSMUSG00000024339,ENSMUSG00000056116,ENSMUSG00000035929,ENSMUSG00000061232,ENSMUSG00000067212,ENSMUSG00000060550
GO:BP	immune system process	GO:0002376	6.02257e-09	8.22022	2720	317	74	27205	ENSMUSG00000056692,ENSMUSG00000018930,ENSMUSG00000036931,ENSMUSG00000020707,ENSMUSG00000029798,ENSMUSG00000032462,ENSMUSG00000024349,ENSMUSG00000021583,ENSMUSG00000024399,ENSMUSG00000027287,ENSMUSG00000029580,ENSMUSG00000029405,ENSMUSG00000024942,ENSMUSG00000021624,ENSMUSG00000027639,ENSMUSG00000032187,ENSMUSG00000069874,ENSMUSG00000078853,ENSMUSG00000032175,ENSMUSG00000078921,ENSMUSG00000090231,…
GO:BP	antigen processing and presentation of endogenous peptide antigen	GO:0002483	2.29565e-08	7.63909	37	317	10	27205	ENSMUSG00000021583,ENSMUSG00000024339,ENSMUSG00000056116,ENSMUSG00000035929,ENSMUSG00000061232,ENSMUSG00000067212,ENSMUSG00000079492,ENSMUSG00000053835,ENSMUSG00000073402,ENSMUSG00000060550
GO:BP	antigen processing and presentation of endogenous antigen	GO:0019883	3.0836e-08	7.51094	38	317	10	27205	ENSMUSG00000021583,ENSMUSG00000024339,ENSMUSG00000056116,ENSMUSG00000035929,ENSMUSG00000061232,ENSMUSG00000067212,ENSMUSG00000079492,ENSMUSG00000053835,ENSMUSG00000073402,ENSMUSG00000060550
GO:BP	antigen processing and presentation of endogenous peptide antigen via MHC class Ib	GO:0002476	6.27292e-08	7.20253	29	317	9	27205	ENSMUSG00000024339,ENSMUSG00000056116,ENSMUSG00000035929,ENSMUSG00000061232,ENSMUSG00000067212,ENSMUSG00000079492,ENSMUSG00000053835,ENSMUSG00000073402,ENSMUSG00000060550
GO:BP	antigen processing and presentation of peptide antigen via MHC class Ib	GO:0002428	8.87011e-08	7.05207	30	317	9	27205	ENSMUSG00000024339,ENSMUSG00000056116,ENSMUSG00000035929,ENSMUSG00000061232,ENSMUSG00000067212,ENSMUSG00000079492,ENSMUSG00000053835,ENSMUSG00000073402,ENSMUSG00000060550
GO:BP	antigen processing and presentation via MHC class Ib	GO:0002475	1.70375e-07	6.76859	32	317	9	27205	ENSMUSG00000024339,ENSMUSG00000056116,ENSMUSG00000035929,ENSMUSG00000061232,ENSMUSG00000067212,ENSMUSG00000079492,ENSMUSG00000053835,ENSMUSG00000073402,ENSMUSG00000060550
GO:BP	biological process involved in interspecies interaction between organisms	GO:0044419	2.89239e-07	6.53874	1962	317	57	27205	ENSMUSG00000056692,ENSMUSG00000018930,ENSMUSG00000020707,ENSMUSG00000029798,ENSMUSG00000029249,ENSMUSG00000031762,ENSMUSG00000002658,ENSMUSG00000032507,ENSMUSG00000024349,ENSMUSG00000022255,ENSMUSG00000029405,ENSMUSG00000021624,ENSMUSG00000027639,ENSMUSG00000021039,ENSMUSG00000006782,ENSMUSG00000024218,ENSMUSG00000032187,ENSMUSG00000069874,ENSMUSG00000078853,ENSMUSG00000032175,ENSMUSG00000038587,…
GO:BP	negative regulation of cellular process	GO:0048523	3.21585e-07	6.4927	4975	317	105	27205	ENSMUSG00000056692,ENSMUSG00000090877,ENSMUSG00000036931,ENSMUSG00000061589,ENSMUSG00000025626,ENSMUSG00000029249,ENSMUSG00000026525,ENSMUSG00000029410,ENSMUSG00000037279,ENSMUSG00000032507,ENSMUSG00000032462,ENSMUSG00000000555,ENSMUSG00000029580,ENSMUSG00000022255,ENSMUSG00000024942,ENSMUSG00000027639,ENSMUSG00000039231,ENSMUSG00000021039,ENSMUSG00000005299,ENSMUSG00000032187,ENSMUSG00000040097,…
GO:BP	response to type II interferon	GO:0034341	1.16424e-06	5.93396	157	317	15	27205	ENSMUSG00000018930,ENSMUSG00000069874,ENSMUSG00000078853,ENSMUSG00000032175,ENSMUSG00000078921,ENSMUSG00000035042,ENSMUSG00000000791,ENSMUSG00000019471,ENSMUSG00000025492,ENSMUSG00000004296,ENSMUSG00000041598,ENSMUSG00000029860,ENSMUSG00000026797,ENSMUSG00000025491,ENSMUSG00000060550
GO:BP	innate immune response	GO:0045087	2.23216e-06	5.65127	1017	317	37	27205	ENSMUSG00000056692,ENSMUSG00000018930,ENSMUSG00000020707,ENSMUSG00000029798,ENSMUSG00000024349,ENSMUSG00000029405,ENSMUSG00000021624,ENSMUSG00000027639,ENSMUSG00000069874,ENSMUSG00000078853,ENSMUSG00000032175,ENSMUSG00000078921,ENSMUSG00000090231,ENSMUSG00000035042,ENSMUSG00000034330,ENSMUSG00000024339,ENSMUSG00000000791,ENSMUSG00000019471,ENSMUSG00000059714,ENSMUSG00000092511,ENSMUSG00000025492,…
GO:BP	immune response	GO:0006955	3.77514e-06	5.42307	1875	317	53	27205	ENSMUSG00000056692,ENSMUSG00000018930,ENSMUSG00000036931,ENSMUSG00000020707,ENSMUSG00000029798,ENSMUSG00000024349,ENSMUSG00000021583,ENSMUSG00000024399,ENSMUSG00000027287,ENSMUSG00000029405,ENSMUSG00000021624,ENSMUSG00000027639,ENSMUSG00000069874,ENSMUSG00000078853,ENSMUSG00000032175,ENSMUSG00000078921,ENSMUSG00000090231,ENSMUSG00000028790,ENSMUSG00000035042,ENSMUSG00000034330,ENSMUSG00000024339,…
GO:BP	defense response to other organism	GO:0098542	6.29578e-06	5.20095	1308	317	42	27205	ENSMUSG00000056692,ENSMUSG00000018930,ENSMUSG00000020707,ENSMUSG00000029798,ENSMUSG00000024349,ENSMUSG00000029405,ENSMUSG00000021624,ENSMUSG00000027639,ENSMUSG00000069874,ENSMUSG00000078853,ENSMUSG00000032175,ENSMUSG00000078921,ENSMUSG00000090231,ENSMUSG00000035208,ENSMUSG00000035042,ENSMUSG00000034330,ENSMUSG00000024339,ENSMUSG00000000791,ENSMUSG00000019471,ENSMUSG00000059714,ENSMUSG00000092511,…
GO:BP	response to stress	GO:0006950	7.69924e-06	5.11355	4156	317	89	27205	ENSMUSG00000026526,ENSMUSG00000056692,ENSMUSG00000090877,ENSMUSG00000018930,ENSMUSG00000036931,ENSMUSG00000061589,ENSMUSG00000020707,ENSMUSG00000029798,ENSMUSG00000041415,ENSMUSG00000029249,ENSMUSG00000031762,ENSMUSG00000031671,ENSMUSG00000032507,ENSMUSG00000032462,ENSMUSG00000024349,ENSMUSG00000000555,ENSMUSG00000027287,ENSMUSG00000029580,ENSMUSG00000029405,ENSMUSG00000024942,ENSMUSG00000021624,…
GO:BP	negative regulation of biological process	GO:0048519	1.04181e-05	4.98221	6000	317	115	27205	ENSMUSG00000056692,ENSMUSG00000090877,ENSMUSG00000036931,ENSMUSG00000061589,ENSMUSG00000025626,ENSMUSG00000041415,ENSMUSG00000029249,ENSMUSG00000026525,ENSMUSG00000029410,ENSMUSG00000031762,ENSMUSG00000037279,ENSMUSG00000073599,ENSMUSG00000032507,ENSMUSG00000029500,ENSMUSG00000032462,ENSMUSG00000000555,ENSMUSG00000029580,ENSMUSG00000022255,ENSMUSG00000024942,ENSMUSG00000027639,ENSMUSG00000039231,…
GO:BP	antigen processing and presentation of peptide antigen	GO:0048002	1.61219e-05	4.79258	69	317	10	27205	ENSMUSG00000021583,ENSMUSG00000024339,ENSMUSG00000056116,ENSMUSG00000035929,ENSMUSG00000061232,ENSMUSG00000067212,ENSMUSG00000079492,ENSMUSG00000053835,ENSMUSG00000073402,ENSMUSG00000060550
GO:BP	antigen processing and presentation	GO:0019882	1.91327e-05	4.71822	113	317	12	27205	ENSMUSG00000021583,ENSMUSG00000024339,ENSMUSG00000056116,ENSMUSG00000035929,ENSMUSG00000061232,ENSMUSG00000067212,ENSMUSG00000038848,ENSMUSG00000079492,ENSMUSG00000053835,ENSMUSG00000073402,ENSMUSG00000060550,ENSMUSG00000078153
GO:BP	defense response	GO:0006952	2.32042e-05	4.63443	1863	317	51	27205	ENSMUSG00000056692,ENSMUSG00000018930,ENSMUSG00000036931,ENSMUSG00000020707,ENSMUSG00000029798,ENSMUSG00000031671,ENSMUSG00000032507,ENSMUSG00000024349,ENSMUSG00000027287,ENSMUSG00000029405,ENSMUSG00000021624,ENSMUSG00000027639,ENSMUSG00000069874,ENSMUSG00000078853,ENSMUSG00000032175,ENSMUSG00000078921,ENSMUSG00000090231,ENSMUSG00000035208,ENSMUSG00000035042,ENSMUSG00000034330,ENSMUSG00000024339,…
GO:BP	regulation of response to stress	GO:0080134	5.7248e-05	4.24224	1467	317	43	27205	ENSMUSG00000026526,ENSMUSG00000056692,ENSMUSG00000020707,ENSMUSG00000029249,ENSMUSG00000031671,ENSMUSG00000032507,ENSMUSG00000032462,ENSMUSG00000024349,ENSMUSG00000029580,ENSMUSG00000021624,ENSMUSG00000027639,ENSMUSG00000039231,ENSMUSG00000005299,ENSMUSG00000032187,ENSMUSG00000069874,ENSMUSG00000078853,ENSMUSG00000035042,ENSMUSG00000034330,ENSMUSG00000024824,ENSMUSG00000024339,ENSMUSG00000000791,…
GO:BP	response to other organism	GO:0051707	6.91562e-05	4.16017	1812	317	49	27205	ENSMUSG00000056692,ENSMUSG00000018930,ENSMUSG00000020707,ENSMUSG00000029798,ENSMUSG00000031762,ENSMUSG00000002658,ENSMUSG00000024349,ENSMUSG00000022255,ENSMUSG00000029405,ENSMUSG00000021624,ENSMUSG00000027639,ENSMUSG00000006782,ENSMUSG00000069874,ENSMUSG00000078853,ENSMUSG00000032175,ENSMUSG00000038587,ENSMUSG00000078921,ENSMUSG00000090231,ENSMUSG00000035208,ENSMUSG00000035042,ENSMUSG00000034330,…
GO:BP	cellular response to type II interferon	GO:0071346	7.19985e-05	4.14268	127	317	12	27205	ENSMUSG00000018930,ENSMUSG00000069874,ENSMUSG00000078853,ENSMUSG00000032175,ENSMUSG00000035042,ENSMUSG00000000791,ENSMUSG00000019471,ENSMUSG00000004296,ENSMUSG00000041598,ENSMUSG00000029860,ENSMUSG00000026797,ENSMUSG00000060550
GO:BP	response to external biotic stimulus	GO:0043207	7.40569e-05	4.13043	1816	317	49	27205	ENSMUSG00000056692,ENSMUSG00000018930,ENSMUSG00000020707,ENSMUSG00000029798,ENSMUSG00000031762,ENSMUSG00000002658,ENSMUSG00000024349,ENSMUSG00000022255,ENSMUSG00000029405,ENSMUSG00000021624,ENSMUSG00000027639,ENSMUSG00000006782,ENSMUSG00000069874,ENSMUSG00000078853,ENSMUSG00000032175,ENSMUSG00000038587,ENSMUSG00000078921,ENSMUSG00000090231,ENSMUSG00000035208,ENSMUSG00000035042,ENSMUSG00000034330,…
GO:BP	response to biotic stimulus	GO:0009607	0.000140191	3.85328	1854	317	49	27205	ENSMUSG00000056692,ENSMUSG00000018930,ENSMUSG00000020707,ENSMUSG00000029798,ENSMUSG00000031762,ENSMUSG00000002658,ENSMUSG00000024349,ENSMUSG00000022255,ENSMUSG00000029405,ENSMUSG00000021624,ENSMUSG00000027639,ENSMUSG00000006782,ENSMUSG00000069874,ENSMUSG00000078853,ENSMUSG00000032175,ENSMUSG00000038587,ENSMUSG00000078921,ENSMUSG00000090231,ENSMUSG00000035208,ENSMUSG00000035042,ENSMUSG00000034330,…
GO:BP	regulation of response to stimulus	GO:0048583	0.000246774	3.6077	4056	317	83	27205	ENSMUSG00000026526,ENSMUSG00000056692,ENSMUSG00000018930,ENSMUSG00000036931,ENSMUSG00000061589,ENSMUSG00000020707,ENSMUSG00000029249,ENSMUSG00000029410,ENSMUSG00000031671,ENSMUSG00000037279,ENSMUSG00000032507,ENSMUSG00000032462,ENSMUSG00000024349,ENSMUSG00000029580,ENSMUSG00000022255,ENSMUSG00000024942,ENSMUSG00000021624,ENSMUSG00000027639,ENSMUSG00000039231,ENSMUSG00000021039,ENSMUSG00000005299,…
GO:BP	protein metabolic process	GO:0019538	0.0003037	3.51756	5554	317	104	27205	ENSMUSG00000090877,ENSMUSG00000061589,ENSMUSG00000020707,ENSMUSG00000029798,ENSMUSG00000029249,ENSMUSG00000029410,ENSMUSG00000031671,ENSMUSG00000073599,ENSMUSG00000032507,ENSMUSG00000029500,ENSMUSG00000028788,ENSMUSG00000032462,ENSMUSG00000021583,ENSMUSG00000000555,ENSMUSG00000020397,ENSMUSG00000029580,ENSMUSG00000039497,ENSMUSG00000024942,ENSMUSG00000042719,ENSMUSG00000039231,ENSMUSG00000021039,…
GO:BP	response to external stimulus	GO:0009605	0.000322112	3.49199	3212	317	70	27205	ENSMUSG00000056692,ENSMUSG00000018930,ENSMUSG00000020707,ENSMUSG00000029798,ENSMUSG00000041415,ENSMUSG00000026525,ENSMUSG00000031762,ENSMUSG00000031671,ENSMUSG00000002658,ENSMUSG00000073599,ENSMUSG00000032507,ENSMUSG00000021728,ENSMUSG00000024349,ENSMUSG00000022255,ENSMUSG00000029405,ENSMUSG00000021624,ENSMUSG00000027639,ENSMUSG00000039231,ENSMUSG00000021039,ENSMUSG00000006782,ENSMUSG00000069874,…
GO:BP	protein modification process	GO:0036211	0.000329216	3.48252	3610	317	76	27205	ENSMUSG00000061589,ENSMUSG00000020707,ENSMUSG00000029798,ENSMUSG00000029410,ENSMUSG00000031671,ENSMUSG00000032507,ENSMUSG00000029500,ENSMUSG00000028788,ENSMUSG00000032462,ENSMUSG00000000555,ENSMUSG00000020397,ENSMUSG00000029580,ENSMUSG00000042719,ENSMUSG00000039231,ENSMUSG00000021039,ENSMUSG00000024218,ENSMUSG00000032187,ENSMUSG00000069874,ENSMUSG00000078853,ENSMUSG00000032175,ENSMUSG00000062352,…
GO:BP	viral transcription	GO:0019083	0.000380149	3.42005	53	317	8	27205	ENSMUSG00000029249,ENSMUSG00000021039,ENSMUSG00000024218,ENSMUSG00000032187,ENSMUSG00000035042,ENSMUSG00000025492,ENSMUSG00000027667,ENSMUSG00000018293
GO:BP	biological regulation	GO:0065007	0.000503255	3.29821	13838	317	206	27205	ENSMUSG00000026526,ENSMUSG00000056692,ENSMUSG00000090877,ENSMUSG00000021036,ENSMUSG00000020577,ENSMUSG00000018930,ENSMUSG00000036931,ENSMUSG00000061589,ENSMUSG00000025626,ENSMUSG00000020707,ENSMUSG00000041415,ENSMUSG00000086784,ENSMUSG00000037400,ENSMUSG00000025059,ENSMUSG00000029249,ENSMUSG00000026525,ENSMUSG00000029410,ENSMUSG00000031762,ENSMUSG00000031671,ENSMUSG00000037279,ENSMUSG00000002658,…
GO:BP	regulation of gene expression	GO:0010468	0.000527495	3.27778	5397	317	101	27205	ENSMUSG00000056692,ENSMUSG00000018930,ENSMUSG00000036931,ENSMUSG00000061589,ENSMUSG00000025626,ENSMUSG00000020707,ENSMUSG00000041415,ENSMUSG00000029249,ENSMUSG00000031671,ENSMUSG00000037279,ENSMUSG00000002658,ENSMUSG00000032462,ENSMUSG00000024349,ENSMUSG00000024399,ENSMUSG00000020397,ENSMUSG00000029580,ENSMUSG00000022255,ENSMUSG00000039231,ENSMUSG00000021039,ENSMUSG00000024218,ENSMUSG00000032187,…
GO:BP	regulation of response to biotic stimulus	GO:0002831	0.000554276	3.25627	479	317	21	27205	ENSMUSG00000056692,ENSMUSG00000020707,ENSMUSG00000024349,ENSMUSG00000021624,ENSMUSG00000027639,ENSMUSG00000069874,ENSMUSG00000078853,ENSMUSG00000035042,ENSMUSG00000034330,ENSMUSG00000024339,ENSMUSG00000000791,ENSMUSG00000019471,ENSMUSG00000059714,ENSMUSG00000025058,ENSMUSG00000004296,ENSMUSG00000017776,ENSMUSG00000020919,ENSMUSG00000051314,ENSMUSG00000047798,ENSMUSG00000004043,ENSMUSG00000024083
GO:BP	regulation of cellular process	GO:0050794	0.000647768	3.18858	12308	317	188	27205	ENSMUSG00000026526,ENSMUSG00000056692,ENSMUSG00000090877,ENSMUSG00000021036,ENSMUSG00000020577,ENSMUSG00000018930,ENSMUSG00000036931,ENSMUSG00000061589,ENSMUSG00000025626,ENSMUSG00000020707,ENSMUSG00000041415,ENSMUSG00000025059,ENSMUSG00000029249,ENSMUSG00000026525,ENSMUSG00000029410,ENSMUSG00000031762,ENSMUSG00000031671,ENSMUSG00000037279,ENSMUSG00000002658,ENSMUSG00000073599,ENSMUSG00000032507,…
GO:BP	regulation of molecular function	GO:0065009	0.000919155	3.03661	2590	317	59	27205	ENSMUSG00000056692,ENSMUSG00000090877,ENSMUSG00000018930,ENSMUSG00000036931,ENSMUSG00000061589,ENSMUSG00000029249,ENSMUSG00000031671,ENSMUSG00000002658,ENSMUSG00000032462,ENSMUSG00000024349,ENSMUSG00000029580,ENSMUSG00000022255,ENSMUSG00000024942,ENSMUSG00000039678,ENSMUSG00000032187,ENSMUSG00000069874,ENSMUSG00000078853,ENSMUSG00000062352,ENSMUSG00000035242,ENSMUSG00000057367,ENSMUSG00000035042,…
GO:BP	catabolic process	GO:0009056	0.000943753	3.02514	2529	317	58	27205	ENSMUSG00000056692,ENSMUSG00000029413,ENSMUSG00000090877,ENSMUSG00000021036,ENSMUSG00000029798,ENSMUSG00000025059,ENSMUSG00000073599,ENSMUSG00000032507,ENSMUSG00000032462,ENSMUSG00000024349,ENSMUSG00000021583,ENSMUSG00000022255,ENSMUSG00000024942,ENSMUSG00000027639,ENSMUSG00000006782,ENSMUSG00000069874,ENSMUSG00000078853,ENSMUSG00000035242,ENSMUSG00000057367,ENSMUSG00000030188,ENSMUSG00000035208,…
GO:BP	positive regulation of immune response	GO:0050778	0.00131276	2.88182	783	317	27	27205	ENSMUSG00000036931,ENSMUSG00000020707,ENSMUSG00000024349,ENSMUSG00000021624,ENSMUSG00000069874,ENSMUSG00000078853,ENSMUSG00000032175,ENSMUSG00000090231,ENSMUSG00000028790,ENSMUSG00000034330,ENSMUSG00000024339,ENSMUSG00000000791,ENSMUSG00000059714,ENSMUSG00000092511,ENSMUSG00000025058,ENSMUSG00000061232,ENSMUSG00000004296,ENSMUSG00000067212,ENSMUSG00000026797,ENSMUSG00000020919,ENSMUSG00000051314,…
GO:BP	macromolecule modification	GO:0043412	0.00131319	2.88167	3805	317	77	27205	ENSMUSG00000061589,ENSMUSG00000020707,ENSMUSG00000029798,ENSMUSG00000029410,ENSMUSG00000031671,ENSMUSG00000032507,ENSMUSG00000029500,ENSMUSG00000028788,ENSMUSG00000032462,ENSMUSG00000000555,ENSMUSG00000020397,ENSMUSG00000029580,ENSMUSG00000042719,ENSMUSG00000039231,ENSMUSG00000021039,ENSMUSG00000024218,ENSMUSG00000032187,ENSMUSG00000069874,ENSMUSG00000078853,ENSMUSG00000032175,ENSMUSG00000062352,…
GO:BP	regulation of innate immune response	GO:0045088	0.00149921	2.82414	383	317	18	27205	ENSMUSG00000020707,ENSMUSG00000024349,ENSMUSG00000021624,ENSMUSG00000027639,ENSMUSG00000069874,ENSMUSG00000078853,ENSMUSG00000034330,ENSMUSG00000024339,ENSMUSG00000019471,ENSMUSG00000059714,ENSMUSG00000025058,ENSMUSG00000004296,ENSMUSG00000017776,ENSMUSG00000020919,ENSMUSG00000051314,ENSMUSG00000047798,ENSMUSG00000004043,ENSMUSG00000024083
GO:BP	organonitrogen compound metabolic process	GO:1901564	0.00167099	2.77703	6489	317	114	27205	ENSMUSG00000029413,ENSMUSG00000090877,ENSMUSG00000021036,ENSMUSG00000061589,ENSMUSG00000020707,ENSMUSG00000029798,ENSMUSG00000029249,ENSMUSG00000029410,ENSMUSG00000031671,ENSMUSG00000073599,ENSMUSG00000032507,ENSMUSG00000029500,ENSMUSG00000028788,ENSMUSG00000032462,ENSMUSG00000021583,ENSMUSG00000000555,ENSMUSG00000020397,ENSMUSG00000029580,ENSMUSG00000039497,ENSMUSG00000024942,ENSMUSG00000042719,…
GO:BP	regulation of defense response	GO:0031347	0.0017535	2.75609	746	317	26	27205	ENSMUSG00000056692,ENSMUSG00000020707,ENSMUSG00000031671,ENSMUSG00000032507,ENSMUSG00000024349,ENSMUSG00000021624,ENSMUSG00000027639,ENSMUSG00000069874,ENSMUSG00000078853,ENSMUSG00000035042,ENSMUSG00000034330,ENSMUSG00000024339,ENSMUSG00000000791,ENSMUSG00000019471,ENSMUSG00000059714,ENSMUSG00000050737,ENSMUSG00000025058,ENSMUSG00000004296,ENSMUSG00000029860,ENSMUSG00000017776,ENSMUSG00000020919,…
GO:BP	organelle organization	GO:0006996	0.00203798	2.6908	3508	317	72	27205	ENSMUSG00000090877,ENSMUSG00000029500,ENSMUSG00000032849,ENSMUSG00000024349,ENSMUSG00000027287,ENSMUSG00000029580,ENSMUSG00000029405,ENSMUSG00000024942,ENSMUSG00000039231,ENSMUSG00000006782,ENSMUSG00000005299,ENSMUSG00000032187,ENSMUSG00000069874,ENSMUSG00000078853,ENSMUSG00000062352,ENSMUSG00000026159,ENSMUSG00000019173,ENSMUSG00000029407,ENSMUSG00000040276,ENSMUSG00000022257,ENSMUSG00000054855,…
GO:BP	regulation of immune response	GO:0050776	0.00212918	2.67179	955	317	30	27205	ENSMUSG00000036931,ENSMUSG00000020707,ENSMUSG00000024349,ENSMUSG00000021624,ENSMUSG00000027639,ENSMUSG00000069874,ENSMUSG00000078853,ENSMUSG00000032175,ENSMUSG00000090231,ENSMUSG00000028790,ENSMUSG00000034330,ENSMUSG00000024339,ENSMUSG00000000791,ENSMUSG00000019471,ENSMUSG00000059714,ENSMUSG00000092511,ENSMUSG00000025058,ENSMUSG00000061232,ENSMUSG00000004296,ENSMUSG00000067212,ENSMUSG00000026797,…
GO:BP	cellular component organization or biogenesis	GO:0071840	0.00237147	2.62498	7835	317	131	27205	ENSMUSG00000090877,ENSMUSG00000024217,ENSMUSG00000061589,ENSMUSG00000020707,ENSMUSG00000041415,ENSMUSG00000037400,ENSMUSG00000029249,ENSMUSG00000032507,ENSMUSG00000029500,ENSMUSG00000032849,ENSMUSG00000021728,ENSMUSG00000024349,ENSMUSG00000000555,ENSMUSG00000027287,ENSMUSG00000020397,ENSMUSG00000029580,ENSMUSG00000029405,ENSMUSG00000024942,ENSMUSG00000020211,ENSMUSG00000027639,ENSMUSG00000039231,…
GO:BP	response to interferon-beta	GO:0035456	0.0030513	2.51551	69	317	8	27205	ENSMUSG00000024349,ENSMUSG00000069874,ENSMUSG00000078853,ENSMUSG00000078921,ENSMUSG00000025492,ENSMUSG00000025491,ENSMUSG00000078920,ENSMUSG00000034459
GO:BP	regulation of immune system process	GO:0002682	0.00307046	2.5128	1581	317	41	27205	ENSMUSG00000036931,ENSMUSG00000020707,ENSMUSG00000032462,ENSMUSG00000024349,ENSMUSG00000029580,ENSMUSG00000024942,ENSMUSG00000021624,ENSMUSG00000027639,ENSMUSG00000032187,ENSMUSG00000069874,ENSMUSG00000078853,ENSMUSG00000032175,ENSMUSG00000090231,ENSMUSG00000028790,ENSMUSG00000035042,ENSMUSG00000034330,ENSMUSG00000024339,ENSMUSG00000000791,ENSMUSG00000019471,ENSMUSG00000059714,ENSMUSG00000092511,…
GO:BP	positive regulation of gene expression	GO:0010628	0.00318293	2.49717	1243	317	35	27205	ENSMUSG00000018930,ENSMUSG00000020707,ENSMUSG00000037279,ENSMUSG00000032462,ENSMUSG00000024349,ENSMUSG00000024399,ENSMUSG00000021039,ENSMUSG00000032175,ENSMUSG00000038587,ENSMUSG00000028790,ENSMUSG00000035042,ENSMUSG00000034330,ENSMUSG00000000791,ENSMUSG00000059714,ENSMUSG00000002028,ENSMUSG00000004296,ENSMUSG00000022136,ENSMUSG00000038848,ENSMUSG00000024816,ENSMUSG00000004936,ENSMUSG00000071072,…
GO:BP	helper T cell diapedesis	GO:0035685	0.00340722	2.4676	3	317	3	27205	ENSMUSG00000035042,ENSMUSG00000017776,ENSMUSG00000006134
GO:BP	positive regulation of biological process	GO:0048518	0.00346626	2.46014	6732	317	116	27205	ENSMUSG00000026526,ENSMUSG00000090877,ENSMUSG00000021036,ENSMUSG00000018930,ENSMUSG00000036931,ENSMUSG00000061589,ENSMUSG00000020707,ENSMUSG00000041415,ENSMUSG00000029249,ENSMUSG00000026525,ENSMUSG00000037279,ENSMUSG00000002658,ENSMUSG00000073599,ENSMUSG00000029500,ENSMUSG00000032849,ENSMUSG00000032462,ENSMUSG00000024349,ENSMUSG00000021583,ENSMUSG00000024399,ENSMUSG00000000555,ENSMUSG00000020397,…
GO:BP	viral gene expression	GO:0019080	0.00380495	2.41965	71	317	8	27205	ENSMUSG00000029249,ENSMUSG00000021039,ENSMUSG00000024218,ENSMUSG00000032187,ENSMUSG00000035042,ENSMUSG00000025492,ENSMUSG00000027667,ENSMUSG00000018293
GO:BP	positive regulation of cytokine production	GO:0001819	0.00390719	2.40814	496	317	20	27205	ENSMUSG00000018930,ENSMUSG00000020707,ENSMUSG00000024349,ENSMUSG00000024399,ENSMUSG00000032175,ENSMUSG00000038587,ENSMUSG00000035042,ENSMUSG00000034330,ENSMUSG00000000791,ENSMUSG00000059714,ENSMUSG00000004296,ENSMUSG00000024816,ENSMUSG00000020919,ENSMUSG00000051314,ENSMUSG00000004043,ENSMUSG00000025958,ENSMUSG00000030530,ENSMUSG00000034266,ENSMUSG00000034947,ENSMUSG00000068417
GO:BP	regulation of cellular component organization	GO:0051128	0.0040574	2.39175	2582	317	57	27205	ENSMUSG00000090877,ENSMUSG00000032507,ENSMUSG00000029500,ENSMUSG00000029580,ENSMUSG00000029405,ENSMUSG00000024942,ENSMUSG00000020211,ENSMUSG00000032187,ENSMUSG00000069874,ENSMUSG00000078853,ENSMUSG00000062352,ENSMUSG00000057367,ENSMUSG00000019173,ENSMUSG00000034330,ENSMUSG00000040276,ENSMUSG00000022257,ENSMUSG00000033933,ENSMUSG00000054855,ENSMUSG00000064302,ENSMUSG00000036167,ENSMUSG00000059325,…
GO:BP	regulation of macromolecule metabolic process	GO:0060255	0.0044695	2.34974	6765	317	116	27205	ENSMUSG00000026526,ENSMUSG00000056692,ENSMUSG00000090877,ENSMUSG00000018930,ENSMUSG00000036931,ENSMUSG00000061589,ENSMUSG00000025626,ENSMUSG00000020707,ENSMUSG00000041415,ENSMUSG00000029249,ENSMUSG00000029410,ENSMUSG00000031671,ENSMUSG00000037279,ENSMUSG00000002658,ENSMUSG00000073599,ENSMUSG00000032462,ENSMUSG00000024349,ENSMUSG00000024399,ENSMUSG00000000555,ENSMUSG00000020397,ENSMUSG00000029580,…
GO:BP	regulation of cellular metabolic process	GO:0031323	0.00504417	2.29721	5510	317	99	27205	ENSMUSG00000026526,ENSMUSG00000021036,ENSMUSG00000036931,ENSMUSG00000061589,ENSMUSG00000025626,ENSMUSG00000025059,ENSMUSG00000029249,ENSMUSG00000026525,ENSMUSG00000029410,ENSMUSG00000031671,ENSMUSG00000037279,ENSMUSG00000002658,ENSMUSG00000032507,ENSMUSG00000032462,ENSMUSG00000024349,ENSMUSG00000000555,ENSMUSG00000020397,ENSMUSG00000029580,ENSMUSG00000022255,ENSMUSG00000039231,ENSMUSG00000021039,…
GO:BP	cellular component organization	GO:0016043	0.0053243	2.27374	7634	317	127	27205	ENSMUSG00000090877,ENSMUSG00000024217,ENSMUSG00000061589,ENSMUSG00000020707,ENSMUSG00000041415,ENSMUSG00000037400,ENSMUSG00000029249,ENSMUSG00000032507,ENSMUSG00000029500,ENSMUSG00000032849,ENSMUSG00000021728,ENSMUSG00000024349,ENSMUSG00000000555,ENSMUSG00000027287,ENSMUSG00000020397,ENSMUSG00000029580,ENSMUSG00000029405,ENSMUSG00000024942,ENSMUSG00000020211,ENSMUSG00000027639,ENSMUSG00000039231,…
GO:BP	regulation of metabolic process	GO:0019222	0.00593559	2.22654	7262	317	122	27205	ENSMUSG00000026526,ENSMUSG00000056692,ENSMUSG00000090877,ENSMUSG00000021036,ENSMUSG00000018930,ENSMUSG00000036931,ENSMUSG00000061589,ENSMUSG00000025626,ENSMUSG00000020707,ENSMUSG00000041415,ENSMUSG00000025059,ENSMUSG00000029249,ENSMUSG00000026525,ENSMUSG00000029410,ENSMUSG00000031671,ENSMUSG00000037279,ENSMUSG00000002658,ENSMUSG00000073599,ENSMUSG00000032507,ENSMUSG00000029500,ENSMUSG00000032462,…
GO:BP	modulation by host of symbiont process	GO:0051851	0.00781409	2.10712	78	317	8	27205	ENSMUSG00000029249,ENSMUSG00000032507,ENSMUSG00000021039,ENSMUSG00000024218,ENSMUSG00000032187,ENSMUSG00000035042,ENSMUSG00000027667,ENSMUSG00000041720
GO:BP	interferon-mediated signaling pathway	GO:0140888	0.00860738	2.06513	79	317	8	27205	ENSMUSG00000024349,ENSMUSG00000027639,ENSMUSG00000069874,ENSMUSG00000078853,ENSMUSG00000032175,ENSMUSG00000019471,ENSMUSG00000025492,ENSMUSG00000025491
GO:BP	cellular response to organic substance	GO:0071310	0.00931276	2.03092	2459	317	54	27205	ENSMUSG00000090877,ENSMUSG00000018930,ENSMUSG00000041415,ENSMUSG00000029249,ENSMUSG00000024349,ENSMUSG00000029580,ENSMUSG00000022255,ENSMUSG00000021624,ENSMUSG00000027639,ENSMUSG00000021039,ENSMUSG00000032187,ENSMUSG00000069874,ENSMUSG00000078853,ENSMUSG00000032175,ENSMUSG00000038587,ENSMUSG00000078921,ENSMUSG00000057367,ENSMUSG00000035042,ENSMUSG00000034330,ENSMUSG00000029407,ENSMUSG00000000791,…
GO:BP	positive regulation of metabolic process	GO:0009893	0.00995943	2.00177	3941	317	76	27205	ENSMUSG00000026526,ENSMUSG00000090877,ENSMUSG00000021036,ENSMUSG00000018930,ENSMUSG00000061589,ENSMUSG00000020707,ENSMUSG00000041415,ENSMUSG00000029249,ENSMUSG00000026525,ENSMUSG00000037279,ENSMUSG00000002658,ENSMUSG00000073599,ENSMUSG00000032462,ENSMUSG00000024349,ENSMUSG00000024399,ENSMUSG00000000555,ENSMUSG00000020397,ENSMUSG00000029580,ENSMUSG00000022255,ENSMUSG00000039231,ENSMUSG00000021039,…
GO:BP	regulation of nitrogen compound metabolic process	GO:0051171	0.00998831	2.00051	5742	317	101	27205	ENSMUSG00000026526,ENSMUSG00000090877,ENSMUSG00000036931,ENSMUSG00000061589,ENSMUSG00000025626,ENSMUSG00000029249,ENSMUSG00000029410,ENSMUSG00000031671,ENSMUSG00000037279,ENSMUSG00000002658,ENSMUSG00000073599,ENSMUSG00000032462,ENSMUSG00000024349,ENSMUSG00000000555,ENSMUSG00000020397,ENSMUSG00000029580,ENSMUSG00000022255,ENSMUSG00000039231,ENSMUSG00000021039,ENSMUSG00000024218,ENSMUSG00000032187,…
GO:BP	regulation of biological process	GO:0050789	0.0101044	1.99549	13424	317	196	27205	ENSMUSG00000026526,ENSMUSG00000056692,ENSMUSG00000090877,ENSMUSG00000021036,ENSMUSG00000020577,ENSMUSG00000018930,ENSMUSG00000036931,ENSMUSG00000061589,ENSMUSG00000025626,ENSMUSG00000020707,ENSMUSG00000041415,ENSMUSG00000025059,ENSMUSG00000029249,ENSMUSG00000026525,ENSMUSG00000029410,ENSMUSG00000031762,ENSMUSG00000031671,ENSMUSG00000037279,ENSMUSG00000002658,ENSMUSG00000073599,ENSMUSG00000032507,…
GO:BP	positive regulation of immune system process	GO:0002684	0.010775	1.96758	1145	317	32	27205	ENSMUSG00000036931,ENSMUSG00000020707,ENSMUSG00000032462,ENSMUSG00000024349,ENSMUSG00000029580,ENSMUSG00000021624,ENSMUSG00000032187,ENSMUSG00000069874,ENSMUSG00000078853,ENSMUSG00000032175,ENSMUSG00000090231,ENSMUSG00000028790,ENSMUSG00000035042,ENSMUSG00000034330,ENSMUSG00000024339,ENSMUSG00000000791,ENSMUSG00000059714,ENSMUSG00000092511,ENSMUSG00000025058,ENSMUSG00000061232,ENSMUSG00000004296,…
GO:BP	regulation of programmed cell death	GO:0043067	0.0109889	1.95905	1665	317	41	27205	ENSMUSG00000090877,ENSMUSG00000036931,ENSMUSG00000029249,ENSMUSG00000026525,ENSMUSG00000073599,ENSMUSG00000032462,ENSMUSG00000000555,ENSMUSG00000029580,ENSMUSG00000022255,ENSMUSG00000024942,ENSMUSG00000032187,ENSMUSG00000038587,ENSMUSG00000057367,ENSMUSG00000035042,ENSMUSG00000034330,ENSMUSG00000024824,ENSMUSG00000041849,ENSMUSG00000063273,ENSMUSG00000033933,ENSMUSG00000028657,ENSMUSG00000004296,…
GO:BP	response to virus	GO:0009615	0.0114076	1.94281	399	317	17	27205	ENSMUSG00000056692,ENSMUSG00000020707,ENSMUSG00000002658,ENSMUSG00000024349,ENSMUSG00000027639,ENSMUSG00000069874,ENSMUSG00000078853,ENSMUSG00000078921,ENSMUSG00000035208,ENSMUSG00000035042,ENSMUSG00000000791,ENSMUSG00000025492,ENSMUSG00000033450,ENSMUSG00000004296,ENSMUSG00000025491,ENSMUSG00000069793,ENSMUSG00000034459
GO:BP	negative regulation of cellular metabolic process	GO:0031324	0.0117668	1.92934	2287	317	51	27205	ENSMUSG00000025626,ENSMUSG00000029249,ENSMUSG00000026525,ENSMUSG00000029410,ENSMUSG00000037279,ENSMUSG00000032462,ENSMUSG00000029580,ENSMUSG00000022255,ENSMUSG00000039231,ENSMUSG00000021039,ENSMUSG00000032187,ENSMUSG00000040097,ENSMUSG00000062352,ENSMUSG00000028790,ENSMUSG00000025332,ENSMUSG00000033933,ENSMUSG00000036167,ENSMUSG00000059325,ENSMUSG00000002028,ENSMUSG00000023991,ENSMUSG00000072620,…
GO:BP	positive regulation of cellular process	GO:0048522	0.0127577	1.89423	5997	317	104	27205	ENSMUSG00000026526,ENSMUSG00000090877,ENSMUSG00000021036,ENSMUSG00000018930,ENSMUSG00000036931,ENSMUSG00000061589,ENSMUSG00000041415,ENSMUSG00000029249,ENSMUSG00000026525,ENSMUSG00000037279,ENSMUSG00000002658,ENSMUSG00000073599,ENSMUSG00000029500,ENSMUSG00000032849,ENSMUSG00000032462,ENSMUSG00000024349,ENSMUSG00000000555,ENSMUSG00000020397,ENSMUSG00000029580,ENSMUSG00000022255,ENSMUSG00000029405,…
GO:BP	positive regulation of cell adhesion	GO:0045785	0.0128064	1.89257	491	317	19	27205	ENSMUSG00000036931,ENSMUSG00000041415,ENSMUSG00000000555,ENSMUSG00000029580,ENSMUSG00000024942,ENSMUSG00000032187,ENSMUSG00000032175,ENSMUSG00000062352,ENSMUSG00000035042,ENSMUSG00000000791,ENSMUSG00000059714,ENSMUSG00000004296,ENSMUSG00000017776,ENSMUSG00000020919,ENSMUSG00000029859,ENSMUSG00000004043,ENSMUSG00000006134,ENSMUSG00000022797,ENSMUSG00000025809
GO:BP	positive regulation of macromolecule metabolic process	GO:0010604	0.013156	1.88088	3624	317	71	27205	ENSMUSG00000026526,ENSMUSG00000090877,ENSMUSG00000018930,ENSMUSG00000061589,ENSMUSG00000020707,ENSMUSG00000029249,ENSMUSG00000037279,ENSMUSG00000002658,ENSMUSG00000073599,ENSMUSG00000032462,ENSMUSG00000024349,ENSMUSG00000024399,ENSMUSG00000000555,ENSMUSG00000020397,ENSMUSG00000029580,ENSMUSG00000022255,ENSMUSG00000039231,ENSMUSG00000021039,ENSMUSG00000024218,ENSMUSG00000032187,ENSMUSG00000069874,…
GO:BP	helper T cell extravasation	GO:0035684	0.0135109	1.86932	4	317	3	27205	ENSMUSG00000035042,ENSMUSG00000017776,ENSMUSG00000006134
GO:BP	regulation of cell adhesion	GO:0030155	0.0152476	1.8168	789	317	25	27205	ENSMUSG00000036931,ENSMUSG00000041415,ENSMUSG00000032462,ENSMUSG00000000555,ENSMUSG00000029580,ENSMUSG00000024942,ENSMUSG00000032187,ENSMUSG00000032175,ENSMUSG00000062352,ENSMUSG00000035042,ENSMUSG00000000791,ENSMUSG00000054855,ENSMUSG00000059714,ENSMUSG00000004296,ENSMUSG00000045394,ENSMUSG00000000738,ENSMUSG00000004936,ENSMUSG00000017776,ENSMUSG00000020919,ENSMUSG00000029859,ENSMUSG00000004043,…
GO:BP	cellular response to cytokine stimulus	GO:0071345	0.0154853	1.81008	1055	317	30	27205	ENSMUSG00000018930,ENSMUSG00000041415,ENSMUSG00000024349,ENSMUSG00000027639,ENSMUSG00000069874,ENSMUSG00000078853,ENSMUSG00000032175,ENSMUSG00000038587,ENSMUSG00000078921,ENSMUSG00000057367,ENSMUSG00000035042,ENSMUSG00000000791,ENSMUSG00000019471,ENSMUSG00000025492,ENSMUSG00000004296,ENSMUSG00000041598,ENSMUSG00000029860,ENSMUSG00000024778,ENSMUSG00000026797,ENSMUSG00000020919,ENSMUSG00000025491,…
GO:BP	response to cytokine	GO:0034097	0.0158663	1.79952	1167	317	32	27205	ENSMUSG00000018930,ENSMUSG00000041415,ENSMUSG00000024349,ENSMUSG00000027639,ENSMUSG00000069874,ENSMUSG00000078853,ENSMUSG00000032175,ENSMUSG00000038587,ENSMUSG00000078921,ENSMUSG00000057367,ENSMUSG00000035042,ENSMUSG00000000791,ENSMUSG00000019471,ENSMUSG00000025492,ENSMUSG00000004296,ENSMUSG00000041598,ENSMUSG00000029860,ENSMUSG00000024778,ENSMUSG00000026797,ENSMUSG00000020919,ENSMUSG00000025491,…
GO:BP	antigen processing and presentation of peptide antigen via MHC class I	GO:0002474	0.016034	1.79496	24	317	5	27205	ENSMUSG00000021583,ENSMUSG00000024339,ENSMUSG00000061232,ENSMUSG00000067212,ENSMUSG00000060550
GO:BP	regulation of response to external stimulus	GO:0032101	0.0169677	1.77038	1060	317	30	27205	ENSMUSG00000056692,ENSMUSG00000020707,ENSMUSG00000031671,ENSMUSG00000032507,ENSMUSG00000024349,ENSMUSG00000021624,ENSMUSG00000027639,ENSMUSG00000021039,ENSMUSG00000069874,ENSMUSG00000078853,ENSMUSG00000035042,ENSMUSG00000034330,ENSMUSG00000024339,ENSMUSG00000000791,ENSMUSG00000019471,ENSMUSG00000059325,ENSMUSG00000059714,ENSMUSG00000050737,ENSMUSG00000025058,ENSMUSG00000004296,ENSMUSG00000038848,…
GO:BP	response to organic substance	GO:0010033	0.0171864	1.76482	3583	317	70	27205	ENSMUSG00000090877,ENSMUSG00000018930,ENSMUSG00000041415,ENSMUSG00000025059,ENSMUSG00000029249,ENSMUSG00000024349,ENSMUSG00000029580,ENSMUSG00000022255,ENSMUSG00000024942,ENSMUSG00000021624,ENSMUSG00000027639,ENSMUSG00000021039,ENSMUSG00000006782,ENSMUSG00000032187,ENSMUSG00000069874,ENSMUSG00000078853,ENSMUSG00000032175,ENSMUSG00000038587,ENSMUSG00000078921,ENSMUSG00000057367,ENSMUSG00000035042,…
GO:BP	positive regulation of natural killer cell proliferation	GO:0032819	0.0180819	1.74276	12	317	4	27205	ENSMUSG00000032175,ENSMUSG00000000791,ENSMUSG00000004296,ENSMUSG00000020919
GO:BP	programmed cell death	GO:0012501	0.0198986	1.70118	2077	317	47	27205	ENSMUSG00000090877,ENSMUSG00000036931,ENSMUSG00000029249,ENSMUSG00000026525,ENSMUSG00000073599,ENSMUSG00000029500,ENSMUSG00000032462,ENSMUSG00000000555,ENSMUSG00000029580,ENSMUSG00000022255,ENSMUSG00000024942,ENSMUSG00000021039,ENSMUSG00000032187,ENSMUSG00000038587,ENSMUSG00000057367,ENSMUSG00000035042,ENSMUSG00000034330,ENSMUSG00000024824,ENSMUSG00000041849,ENSMUSG00000063273,ENSMUSG00000033933,…
GO:BP	regulation of primary metabolic process	GO:0080090	0.0244104	1.61242	5933	317	102	27205	ENSMUSG00000026526,ENSMUSG00000090877,ENSMUSG00000036931,ENSMUSG00000061589,ENSMUSG00000025626,ENSMUSG00000025059,ENSMUSG00000029249,ENSMUSG00000029410,ENSMUSG00000031671,ENSMUSG00000037279,ENSMUSG00000002658,ENSMUSG00000073599,ENSMUSG00000032462,ENSMUSG00000024349,ENSMUSG00000000555,ENSMUSG00000020397,ENSMUSG00000029580,ENSMUSG00000022255,ENSMUSG00000039231,ENSMUSG00000021039,ENSMUSG00000024218,…
GO:BP	cellular catabolic process	GO:0044248	0.025211	1.59841	1425	317	36	27205	ENSMUSG00000056692,ENSMUSG00000021036,ENSMUSG00000032507,ENSMUSG00000032462,ENSMUSG00000024349,ENSMUSG00000021583,ENSMUSG00000022255,ENSMUSG00000024942,ENSMUSG00000027639,ENSMUSG00000006782,ENSMUSG00000069874,ENSMUSG00000078853,ENSMUSG00000030188,ENSMUSG00000035208,ENSMUSG00000034330,ENSMUSG00000019471,ENSMUSG00000026664,ENSMUSG00000072620,ENSMUSG00000038848,ENSMUSG00000025630,ENSMUSG00000021143,…
GO:BP	biosynthetic process	GO:0009058	0.0298199	1.52549	5960	317	102	27205	ENSMUSG00000021036,ENSMUSG00000036931,ENSMUSG00000061589,ENSMUSG00000025626,ENSMUSG00000041415,ENSMUSG00000025059,ENSMUSG00000029249,ENSMUSG00000026525,ENSMUSG00000031671,ENSMUSG00000037279,ENSMUSG00000002658,ENSMUSG00000032507,ENSMUSG00000032462,ENSMUSG00000024349,ENSMUSG00000020397,ENSMUSG00000029580,ENSMUSG00000039497,ENSMUSG00000022255,ENSMUSG00000039231,ENSMUSG00000021039,ENSMUSG00000024218,…
GO:BP	cellular response to chemical stimulus	GO:0070887	0.033505	1.47489	3173	317	63	27205	ENSMUSG00000090877,ENSMUSG00000018930,ENSMUSG00000041415,ENSMUSG00000029249,ENSMUSG00000031762,ENSMUSG00000032462,ENSMUSG00000024349,ENSMUSG00000029580,ENSMUSG00000022255,ENSMUSG00000024942,ENSMUSG00000021624,ENSMUSG00000027639,ENSMUSG00000039231,ENSMUSG00000021039,ENSMUSG00000005299,ENSMUSG00000032187,ENSMUSG00000069874,ENSMUSG00000078853,ENSMUSG00000032175,ENSMUSG00000038587,ENSMUSG00000078921,…
GO:BP	positive regulation of innate immune response	GO:0045089	0.034088	1.4674	305	317	14	27205	ENSMUSG00000020707,ENSMUSG00000024349,ENSMUSG00000021624,ENSMUSG00000069874,ENSMUSG00000078853,ENSMUSG00000034330,ENSMUSG00000059714,ENSMUSG00000025058,ENSMUSG00000004296,ENSMUSG00000020919,ENSMUSG00000051314,ENSMUSG00000047798,ENSMUSG00000004043,ENSMUSG00000024083
GO:BP	regulation of multicellular organismal process	GO:0051239	0.0351335	1.45428	3246	317	64	27205	ENSMUSG00000026526,ENSMUSG00000056692,ENSMUSG00000018930,ENSMUSG00000036931,ENSMUSG00000020707,ENSMUSG00000041415,ENSMUSG00000029249,ENSMUSG00000037279,ENSMUSG00000073599,ENSMUSG00000029500,ENSMUSG00000032462,ENSMUSG00000024349,ENSMUSG00000021583,ENSMUSG00000024399,ENSMUSG00000000555,ENSMUSG00000029580,ENSMUSG00000022255,ENSMUSG00000039231,ENSMUSG00000032187,ENSMUSG00000032175,ENSMUSG00000038587,…
GO:BP	regulation of natural killer cell proliferation	GO:0032817	0.0358975	1.44494	14	317	4	27205	ENSMUSG00000032175,ENSMUSG00000000791,ENSMUSG00000004296,ENSMUSG00000020919
GO:BP	transport	GO:0006810	0.0382081	1.41784	4664	317	84	27205	ENSMUSG00000019802,ENSMUSG00000090877,ENSMUSG00000020577,ENSMUSG00000037400,ENSMUSG00000029249,ENSMUSG00000026525,ENSMUSG00000006169,ENSMUSG00000032849,ENSMUSG00000032462,ENSMUSG00000021728,ENSMUSG00000027287,ENSMUSG00000029580,ENSMUSG00000029405,ENSMUSG00000039678,ENSMUSG00000006782,ENSMUSG00000005299,ENSMUSG00000062352,ENSMUSG00000035242,ENSMUSG00000028790,ENSMUSG00000035042,ENSMUSG00000019173,…
GO:BP	regulation of apoptotic process	GO:0042981	0.0382504	1.41736	1633	317	39	27205	ENSMUSG00000090877,ENSMUSG00000036931,ENSMUSG00000029249,ENSMUSG00000026525,ENSMUSG00000073599,ENSMUSG00000032462,ENSMUSG00000000555,ENSMUSG00000029580,ENSMUSG00000022255,ENSMUSG00000024942,ENSMUSG00000032187,ENSMUSG00000038587,ENSMUSG00000057367,ENSMUSG00000035042,ENSMUSG00000024824,ENSMUSG00000041849,ENSMUSG00000063273,ENSMUSG00000033933,ENSMUSG00000028657,ENSMUSG00000004296,ENSMUSG00000022136,…
GO:BP	phosphate-containing compound metabolic process	GO:0006796	0.0414123	1.38287	2790	317	57	27205	ENSMUSG00000029413,ENSMUSG00000021036,ENSMUSG00000025059,ENSMUSG00000029410,ENSMUSG00000029500,ENSMUSG00000028788,ENSMUSG00000032462,ENSMUSG00000000555,ENSMUSG00000029580,ENSMUSG00000027639,ENSMUSG00000006782,ENSMUSG00000024218,ENSMUSG00000069874,ENSMUSG00000078853,ENSMUSG00000032175,ENSMUSG00000038587,ENSMUSG00000062352,ENSMUSG00000035042,ENSMUSG00000034330,ENSMUSG00000037826,ENSMUSG00000000791,…
GO:BP	establishment of localization	GO:0051234	0.0426662	1.36992	4823	317	86	27205	ENSMUSG00000019802,ENSMUSG00000090877,ENSMUSG00000020577,ENSMUSG00000037400,ENSMUSG00000029249,ENSMUSG00000026525,ENSMUSG00000006169,ENSMUSG00000032849,ENSMUSG00000032462,ENSMUSG00000021728,ENSMUSG00000027287,ENSMUSG00000029580,ENSMUSG00000029405,ENSMUSG00000039678,ENSMUSG00000006782,ENSMUSG00000005299,ENSMUSG00000062352,ENSMUSG00000035242,ENSMUSG00000028790,ENSMUSG00000035042,ENSMUSG00000019173,…
GO:BP	positive regulation of natural killer cell activation	GO:0032816	0.0427088	1.36948	29	317	5	27205	ENSMUSG00000032175,ENSMUSG00000000791,ENSMUSG00000004296,ENSMUSG00000020919,ENSMUSG00000004043
GO:BP	localization	GO:0051179	0.0445496	1.35116	5491	317	95	27205	ENSMUSG00000019802,ENSMUSG00000056692,ENSMUSG00000090877,ENSMUSG00000020577,ENSMUSG00000037400,ENSMUSG00000029249,ENSMUSG00000026525,ENSMUSG00000006169,ENSMUSG00000032849,ENSMUSG00000032462,ENSMUSG00000021728,ENSMUSG00000027287,ENSMUSG00000029580,ENSMUSG00000029405,ENSMUSG00000039678,ENSMUSG00000006782,ENSMUSG00000005299,ENSMUSG00000062352,ENSMUSG00000035242,ENSMUSG00000028790,ENSMUSG00000035042,…
GO:BP	organic substance biosynthetic process	GO:1901576	0.0446665	1.35002	5865	317	100	27205	ENSMUSG00000021036,ENSMUSG00000036931,ENSMUSG00000061589,ENSMUSG00000025626,ENSMUSG00000025059,ENSMUSG00000029249,ENSMUSG00000026525,ENSMUSG00000031671,ENSMUSG00000037279,ENSMUSG00000002658,ENSMUSG00000032507,ENSMUSG00000032462,ENSMUSG00000024349,ENSMUSG00000020397,ENSMUSG00000029580,ENSMUSG00000039497,ENSMUSG00000022255,ENSMUSG00000039231,ENSMUSG00000021039,ENSMUSG00000024218,ENSMUSG00000032187,…
GO:BP	cellular component biogenesis	GO:0044085	0.048927	1.31045	4334	317	79	27205	ENSMUSG00000090877,ENSMUSG00000024217,ENSMUSG00000020707,ENSMUSG00000041415,ENSMUSG00000029249,ENSMUSG00000032507,ENSMUSG00000032849,ENSMUSG00000024349,ENSMUSG00000000555,ENSMUSG00000027287,ENSMUSG00000020397,ENSMUSG00000029580,ENSMUSG00000029405,ENSMUSG00000024942,ENSMUSG00000020211,ENSMUSG00000027639,ENSMUSG00000039231,ENSMUSG00000024218,ENSMUSG00000005299,ENSMUSG00000032187,ENSMUSG00000069874,…
GO:BP	regulation of cell death	GO:0010941	0.0489646	1.31012	1836	317	42	27205	ENSMUSG00000090877,ENSMUSG00000036931,ENSMUSG00000029249,ENSMUSG00000026525,ENSMUSG00000073599,ENSMUSG00000032462,ENSMUSG00000000555,ENSMUSG00000029580,ENSMUSG00000022255,ENSMUSG00000024942,ENSMUSG00000032187,ENSMUSG00000038587,ENSMUSG00000057367,ENSMUSG00000035042,ENSMUSG00000034330,ENSMUSG00000024824,ENSMUSG00000041849,ENSMUSG00000063273,ENSMUSG00000033933,ENSMUSG00000028657,ENSMUSG00000004296,…
GO:BP	intracellular signal transduction	GO:0035556	0.0490459	1.3094	2607	317	54	27205	ENSMUSG00000018930,ENSMUSG00000036931,ENSMUSG00000061589,ENSMUSG00000041415,ENSMUSG00000029410,ENSMUSG00000031762,ENSMUSG00000037279,ENSMUSG00000032507,ENSMUSG00000032462,ENSMUSG00000022255,ENSMUSG00000029405,ENSMUSG00000024942,ENSMUSG00000021039,ENSMUSG00000069874,ENSMUSG00000078853,ENSMUSG00000032175,ENSMUSG00000038587,ENSMUSG00000062352,ENSMUSG00000057367,ENSMUSG00000035042,ENSMUSG00000034330,…
GO:BP	immune system process	GO:0002376	6.02257e-09	8.22022	2720	317	74	27205	ENSMUSG00000056692,ENSMUSG00000018930,ENSMUSG00000036931,ENSMUSG00000020707,ENSMUSG00000029798,ENSMUSG00000032462,ENSMUSG00000024349,ENSMUSG00000021583,ENSMUSG00000024399,ENSMUSG00000027287,ENSMUSG00000029580,ENSMUSG00000029405,ENSMUSG00000024942,ENSMUSG00000021624,ENSMUSG00000027639,ENSMUSG00000032187,ENSMUSG00000069874,ENSMUSG00000078853,ENSMUSG00000032175,ENSMUSG00000078921,ENSMUSG00000090231,…
GO:BP	antigen processing and presentation of endogenous peptide antigen	GO:0002483	2.29565e-08	7.63909	37	317	10	27205	ENSMUSG00000021583,ENSMUSG00000024339,ENSMUSG00000056116,ENSMUSG00000035929,ENSMUSG00000061232,ENSMUSG00000067212,ENSMUSG00000079492,ENSMUSG00000053835,ENSMUSG00000073402,ENSMUSG00000060550
GO:BP	antigen processing and presentation of endogenous antigen	GO:0019883	3.0836e-08	7.51094	38	317	10	27205	ENSMUSG00000021583,ENSMUSG00000024339,ENSMUSG00000056116,ENSMUSG00000035929,ENSMUSG00000061232,ENSMUSG00000067212,ENSMUSG00000079492,ENSMUSG00000053835,ENSMUSG00000073402,ENSMUSG00000060550
GO:BP	antigen processing and presentation of endogenous peptide antigen via MHC class Ib	GO:0002476	6.27292e-08	7.20253	29	317	9	27205	ENSMUSG00000024339,ENSMUSG00000056116,ENSMUSG00000035929,ENSMUSG00000061232,ENSMUSG00000067212,ENSMUSG00000079492,ENSMUSG00000053835,ENSMUSG00000073402,ENSMUSG00000060550
GO:BP	antigen processing and presentation of peptide antigen via MHC class Ib	GO:0002428	8.87011e-08	7.05207	30	317	9	27205	ENSMUSG00000024339,ENSMUSG00000056116,ENSMUSG00000035929,ENSMUSG00000061232,ENSMUSG00000067212,ENSMUSG00000079492,ENSMUSG00000053835,ENSMUSG00000073402,ENSMUSG00000060550
GO:BP	antigen processing and presentation via MHC class Ib	GO:0002475	1.70375e-07	6.76859	32	317	9	27205	ENSMUSG00000024339,ENSMUSG00000056116,ENSMUSG00000035929,ENSMUSG00000061232,ENSMUSG00000067212,ENSMUSG00000079492,ENSMUSG00000053835,ENSMUSG00000073402,ENSMUSG00000060550
GO:BP	biological process involved in interspecies interaction between organisms	GO:0044419	2.89239e-07	6.53874	1962	317	57	27205	ENSMUSG00000056692,ENSMUSG00000018930,ENSMUSG00000020707,ENSMUSG00000029798,ENSMUSG00000029249,ENSMUSG00000031762,ENSMUSG00000002658,ENSMUSG00000032507,ENSMUSG00000024349,ENSMUSG00000022255,ENSMUSG00000029405,ENSMUSG00000021624,ENSMUSG00000027639,ENSMUSG00000021039,ENSMUSG00000006782,ENSMUSG00000024218,ENSMUSG00000032187,ENSMUSG00000069874,ENSMUSG00000078853,ENSMUSG00000032175,ENSMUSG00000038587,…
GO:BP	negative regulation of cellular process	GO:0048523	3.21585e-07	6.4927	4975	317	105	27205	ENSMUSG00000056692,ENSMUSG00000090877,ENSMUSG00000036931,ENSMUSG00000061589,ENSMUSG00000025626,ENSMUSG00000029249,ENSMUSG00000026525,ENSMUSG00000029410,ENSMUSG00000037279,ENSMUSG00000032507,ENSMUSG00000032462,ENSMUSG00000000555,ENSMUSG00000029580,ENSMUSG00000022255,ENSMUSG00000024942,ENSMUSG00000027639,ENSMUSG00000039231,ENSMUSG00000021039,ENSMUSG00000005299,ENSMUSG00000032187,ENSMUSG00000040097,…
GO:BP	response to type II interferon	GO:0034341	1.16424e-06	5.93396	157	317	15	27205	ENSMUSG00000018930,ENSMUSG00000069874,ENSMUSG00000078853,ENSMUSG00000032175,ENSMUSG00000078921,ENSMUSG00000035042,ENSMUSG00000000791,ENSMUSG00000019471,ENSMUSG00000025492,ENSMUSG00000004296,ENSMUSG00000041598,ENSMUSG00000029860,ENSMUSG00000026797,ENSMUSG00000025491,ENSMUSG00000060550
GO:BP	innate immune response	GO:0045087	2.23216e-06	5.65127	1017	317	37	27205	ENSMUSG00000056692,ENSMUSG00000018930,ENSMUSG00000020707,ENSMUSG00000029798,ENSMUSG00000024349,ENSMUSG00000029405,ENSMUSG00000021624,ENSMUSG00000027639,ENSMUSG00000069874,ENSMUSG00000078853,ENSMUSG00000032175,ENSMUSG00000078921,ENSMUSG00000090231,ENSMUSG00000035042,ENSMUSG00000034330,ENSMUSG00000024339,ENSMUSG00000000791,ENSMUSG00000019471,ENSMUSG00000059714,ENSMUSG00000092511,ENSMUSG00000025492,…
GO:BP	immune response	GO:0006955	3.77514e-06	5.42307	1875	317	53	27205	ENSMUSG00000056692,ENSMUSG00000018930,ENSMUSG00000036931,ENSMUSG00000020707,ENSMUSG00000029798,ENSMUSG00000024349,ENSMUSG00000021583,ENSMUSG00000024399,ENSMUSG00000027287,ENSMUSG00000029405,ENSMUSG00000021624,ENSMUSG00000027639,ENSMUSG00000069874,ENSMUSG00000078853,ENSMUSG00000032175,ENSMUSG00000078921,ENSMUSG00000090231,ENSMUSG00000028790,ENSMUSG00000035042,ENSMUSG00000034330,ENSMUSG00000024339,…
GO:BP	defense response to other organism	GO:0098542	6.29578e-06	5.20095	1308	317	42	27205	ENSMUSG00000056692,ENSMUSG00000018930,ENSMUSG00000020707,ENSMUSG00000029798,ENSMUSG00000024349,ENSMUSG00000029405,ENSMUSG00000021624,ENSMUSG00000027639,ENSMUSG00000069874,ENSMUSG00000078853,ENSMUSG00000032175,ENSMUSG00000078921,ENSMUSG00000090231,ENSMUSG00000035208,ENSMUSG00000035042,ENSMUSG00000034330,ENSMUSG00000024339,ENSMUSG00000000791,ENSMUSG00000019471,ENSMUSG00000059714,ENSMUSG00000092511,…
GO:BP	response to stress	GO:0006950	7.69924e-06	5.11355	4156	317	89	27205	ENSMUSG00000026526,ENSMUSG00000056692,ENSMUSG00000090877,ENSMUSG00000018930,ENSMUSG00000036931,ENSMUSG00000061589,ENSMUSG00000020707,ENSMUSG00000029798,ENSMUSG00000041415,ENSMUSG00000029249,ENSMUSG00000031762,ENSMUSG00000031671,ENSMUSG00000032507,ENSMUSG00000032462,ENSMUSG00000024349,ENSMUSG00000000555,ENSMUSG00000027287,ENSMUSG00000029580,ENSMUSG00000029405,ENSMUSG00000024942,ENSMUSG00000021624,…
GO:BP	negative regulation of biological process	GO:0048519	1.04181e-05	4.98221	6000	317	115	27205	ENSMUSG00000056692,ENSMUSG00000090877,ENSMUSG00000036931,ENSMUSG00000061589,ENSMUSG00000025626,ENSMUSG00000041415,ENSMUSG00000029249,ENSMUSG00000026525,ENSMUSG00000029410,ENSMUSG00000031762,ENSMUSG00000037279,ENSMUSG00000073599,ENSMUSG00000032507,ENSMUSG00000029500,ENSMUSG00000032462,ENSMUSG00000000555,ENSMUSG00000029580,ENSMUSG00000022255,ENSMUSG00000024942,ENSMUSG00000027639,ENSMUSG00000039231,…
GO:BP	antigen processing and presentation of peptide antigen	GO:0048002	1.61219e-05	4.79258	69	317	10	27205	ENSMUSG00000021583,ENSMUSG00000024339,ENSMUSG00000056116,ENSMUSG00000035929,ENSMUSG00000061232,ENSMUSG00000067212,ENSMUSG00000079492,ENSMUSG00000053835,ENSMUSG00000073402,ENSMUSG00000060550
GO:BP	antigen processing and presentation	GO:0019882	1.91327e-05	4.71822	113	317	12	27205	ENSMUSG00000021583,ENSMUSG00000024339,ENSMUSG00000056116,ENSMUSG00000035929,ENSMUSG00000061232,ENSMUSG00000067212,ENSMUSG00000038848,ENSMUSG00000079492,ENSMUSG00000053835,ENSMUSG00000073402,ENSMUSG00000060550,ENSMUSG00000078153
GO:BP	defense response	GO:0006952	2.32042e-05	4.63443	1863	317	51	27205	ENSMUSG00000056692,ENSMUSG00000018930,ENSMUSG00000036931,ENSMUSG00000020707,ENSMUSG00000029798,ENSMUSG00000031671,ENSMUSG00000032507,ENSMUSG00000024349,ENSMUSG00000027287,ENSMUSG00000029405,ENSMUSG00000021624,ENSMUSG00000027639,ENSMUSG00000069874,ENSMUSG00000078853,ENSMUSG00000032175,ENSMUSG00000078921,ENSMUSG00000090231,ENSMUSG00000035208,ENSMUSG00000035042,ENSMUSG00000034330,ENSMUSG00000024339,…
GO:BP	regulation of response to stress	GO:0080134	5.7248e-05	4.24224	1467	317	43	27205	ENSMUSG00000026526,ENSMUSG00000056692,ENSMUSG00000020707,ENSMUSG00000029249,ENSMUSG00000031671,ENSMUSG00000032507,ENSMUSG00000032462,ENSMUSG00000024349,ENSMUSG00000029580,ENSMUSG00000021624,ENSMUSG00000027639,ENSMUSG00000039231,ENSMUSG00000005299,ENSMUSG00000032187,ENSMUSG00000069874,ENSMUSG00000078853,ENSMUSG00000035042,ENSMUSG00000034330,ENSMUSG00000024824,ENSMUSG00000024339,ENSMUSG00000000791,…
GO:BP	response to other organism	GO:0051707	6.91562e-05	4.16017	1812	317	49	27205	ENSMUSG00000056692,ENSMUSG00000018930,ENSMUSG00000020707,ENSMUSG00000029798,ENSMUSG00000031762,ENSMUSG00000002658,ENSMUSG00000024349,ENSMUSG00000022255,ENSMUSG00000029405,ENSMUSG00000021624,ENSMUSG00000027639,ENSMUSG00000006782,ENSMUSG00000069874,ENSMUSG00000078853,ENSMUSG00000032175,ENSMUSG00000038587,ENSMUSG00000078921,ENSMUSG00000090231,ENSMUSG00000035208,ENSMUSG00000035042,ENSMUSG00000034330,…
GO:BP	cellular response to type II interferon	GO:0071346	7.19985e-05	4.14268	127	317	12	27205	ENSMUSG00000018930,ENSMUSG00000069874,ENSMUSG00000078853,ENSMUSG00000032175,ENSMUSG00000035042,ENSMUSG00000000791,ENSMUSG00000019471,ENSMUSG00000004296,ENSMUSG00000041598,ENSMUSG00000029860,ENSMUSG00000026797,ENSMUSG00000060550
GO:BP	response to external biotic stimulus	GO:0043207	7.40569e-05	4.13043	1816	317	49	27205	ENSMUSG00000056692,ENSMUSG00000018930,ENSMUSG00000020707,ENSMUSG00000029798,ENSMUSG00000031762,ENSMUSG00000002658,ENSMUSG00000024349,ENSMUSG00000022255,ENSMUSG00000029405,ENSMUSG00000021624,ENSMUSG00000027639,ENSMUSG00000006782,ENSMUSG00000069874,ENSMUSG00000078853,ENSMUSG00000032175,ENSMUSG00000038587,ENSMUSG00000078921,ENSMUSG00000090231,ENSMUSG00000035208,ENSMUSG00000035042,ENSMUSG00000034330,…
GO:BP	response to biotic stimulus	GO:0009607	0.000140191	3.85328	1854	317	49	27205	ENSMUSG00000056692,ENSMUSG00000018930,ENSMUSG00000020707,ENSMUSG00000029798,ENSMUSG00000031762,ENSMUSG00000002658,ENSMUSG00000024349,ENSMUSG00000022255,ENSMUSG00000029405,ENSMUSG00000021624,ENSMUSG00000027639,ENSMUSG00000006782,ENSMUSG00000069874,ENSMUSG00000078853,ENSMUSG00000032175,ENSMUSG00000038587,ENSMUSG00000078921,ENSMUSG00000090231,ENSMUSG00000035208,ENSMUSG00000035042,ENSMUSG00000034330,…
GO:BP	regulation of response to stimulus	GO:0048583	0.000246774	3.6077	4056	317	83	27205	ENSMUSG00000026526,ENSMUSG00000056692,ENSMUSG00000018930,ENSMUSG00000036931,ENSMUSG00000061589,ENSMUSG00000020707,ENSMUSG00000029249,ENSMUSG00000029410,ENSMUSG00000031671,ENSMUSG00000037279,ENSMUSG00000032507,ENSMUSG00000032462,ENSMUSG00000024349,ENSMUSG00000029580,ENSMUSG00000022255,ENSMUSG00000024942,ENSMUSG00000021624,ENSMUSG00000027639,ENSMUSG00000039231,ENSMUSG00000021039,ENSMUSG00000005299,…
GO:BP	protein metabolic process	GO:0019538	0.0003037	3.51756	5554	317	104	27205	ENSMUSG00000090877,ENSMUSG00000061589,ENSMUSG00000020707,ENSMUSG00000029798,ENSMUSG00000029249,ENSMUSG00000029410,ENSMUSG00000031671,ENSMUSG00000073599,ENSMUSG00000032507,ENSMUSG00000029500,ENSMUSG00000028788,ENSMUSG00000032462,ENSMUSG00000021583,ENSMUSG00000000555,ENSMUSG00000020397,ENSMUSG00000029580,ENSMUSG00000039497,ENSMUSG00000024942,ENSMUSG00000042719,ENSMUSG00000039231,ENSMUSG00000021039,…
GO:BP	response to external stimulus	GO:0009605	0.000322112	3.49199	3212	317	70	27205	ENSMUSG00000056692,ENSMUSG00000018930,ENSMUSG00000020707,ENSMUSG00000029798,ENSMUSG00000041415,ENSMUSG00000026525,ENSMUSG00000031762,ENSMUSG00000031671,ENSMUSG00000002658,ENSMUSG00000073599,ENSMUSG00000032507,ENSMUSG00000021728,ENSMUSG00000024349,ENSMUSG00000022255,ENSMUSG00000029405,ENSMUSG00000021624,ENSMUSG00000027639,ENSMUSG00000039231,ENSMUSG00000021039,ENSMUSG00000006782,ENSMUSG00000069874,…
GO:BP	protein modification process	GO:0036211	0.000329216	3.48252	3610	317	76	27205	ENSMUSG00000061589,ENSMUSG00000020707,ENSMUSG00000029798,ENSMUSG00000029410,ENSMUSG00000031671,ENSMUSG00000032507,ENSMUSG00000029500,ENSMUSG00000028788,ENSMUSG00000032462,ENSMUSG00000000555,ENSMUSG00000020397,ENSMUSG00000029580,ENSMUSG00000042719,ENSMUSG00000039231,ENSMUSG00000021039,ENSMUSG00000024218,ENSMUSG00000032187,ENSMUSG00000069874,ENSMUSG00000078853,ENSMUSG00000032175,ENSMUSG00000062352,…
GO:BP	viral transcription	GO:0019083	0.000380149	3.42005	53	317	8	27205	ENSMUSG00000029249,ENSMUSG00000021039,ENSMUSG00000024218,ENSMUSG00000032187,ENSMUSG00000035042,ENSMUSG00000025492,ENSMUSG00000027667,ENSMUSG00000018293
GO:BP	biological regulation	GO:0065007	0.000503255	3.29821	13838	317	206	27205	ENSMUSG00000026526,ENSMUSG00000056692,ENSMUSG00000090877,ENSMUSG00000021036,ENSMUSG00000020577,ENSMUSG00000018930,ENSMUSG00000036931,ENSMUSG00000061589,ENSMUSG00000025626,ENSMUSG00000020707,ENSMUSG00000041415,ENSMUSG00000086784,ENSMUSG00000037400,ENSMUSG00000025059,ENSMUSG00000029249,ENSMUSG00000026525,ENSMUSG00000029410,ENSMUSG00000031762,ENSMUSG00000031671,ENSMUSG00000037279,ENSMUSG00000002658,…
GO:BP	regulation of gene expression	GO:0010468	0.000527495	3.27778	5397	317	101	27205	ENSMUSG00000056692,ENSMUSG00000018930,ENSMUSG00000036931,ENSMUSG00000061589,ENSMUSG00000025626,ENSMUSG00000020707,ENSMUSG00000041415,ENSMUSG00000029249,ENSMUSG00000031671,ENSMUSG00000037279,ENSMUSG00000002658,ENSMUSG00000032462,ENSMUSG00000024349,ENSMUSG00000024399,ENSMUSG00000020397,ENSMUSG00000029580,ENSMUSG00000022255,ENSMUSG00000039231,ENSMUSG00000021039,ENSMUSG00000024218,ENSMUSG00000032187,…
GO:BP	regulation of response to biotic stimulus	GO:0002831	0.000554276	3.25627	479	317	21	27205	ENSMUSG00000056692,ENSMUSG00000020707,ENSMUSG00000024349,ENSMUSG00000021624,ENSMUSG00000027639,ENSMUSG00000069874,ENSMUSG00000078853,ENSMUSG00000035042,ENSMUSG00000034330,ENSMUSG00000024339,ENSMUSG00000000791,ENSMUSG00000019471,ENSMUSG00000059714,ENSMUSG00000025058,ENSMUSG00000004296,ENSMUSG00000017776,ENSMUSG00000020919,ENSMUSG00000051314,ENSMUSG00000047798,ENSMUSG00000004043,ENSMUSG00000024083
GO:BP	regulation of cellular process	GO:0050794	0.000647768	3.18858	12308	317	188	27205	ENSMUSG00000026526,ENSMUSG00000056692,ENSMUSG00000090877,ENSMUSG00000021036,ENSMUSG00000020577,ENSMUSG00000018930,ENSMUSG00000036931,ENSMUSG00000061589,ENSMUSG00000025626,ENSMUSG00000020707,ENSMUSG00000041415,ENSMUSG00000025059,ENSMUSG00000029249,ENSMUSG00000026525,ENSMUSG00000029410,ENSMUSG00000031762,ENSMUSG00000031671,ENSMUSG00000037279,ENSMUSG00000002658,ENSMUSG00000073599,ENSMUSG00000032507,…
GO:BP	regulation of molecular function	GO:0065009	0.000919155	3.03661	2590	317	59	27205	ENSMUSG00000056692,ENSMUSG00000090877,ENSMUSG00000018930,ENSMUSG00000036931,ENSMUSG00000061589,ENSMUSG00000029249,ENSMUSG00000031671,ENSMUSG00000002658,ENSMUSG00000032462,ENSMUSG00000024349,ENSMUSG00000029580,ENSMUSG00000022255,ENSMUSG00000024942,ENSMUSG00000039678,ENSMUSG00000032187,ENSMUSG00000069874,ENSMUSG00000078853,ENSMUSG00000062352,ENSMUSG00000035242,ENSMUSG00000057367,ENSMUSG00000035042,…
GO:BP	catabolic process	GO:0009056	0.000943753	3.02514	2529	317	58	27205	ENSMUSG00000056692,ENSMUSG00000029413,ENSMUSG00000090877,ENSMUSG00000021036,ENSMUSG00000029798,ENSMUSG00000025059,ENSMUSG00000073599,ENSMUSG00000032507,ENSMUSG00000032462,ENSMUSG00000024349,ENSMUSG00000021583,ENSMUSG00000022255,ENSMUSG00000024942,ENSMUSG00000027639,ENSMUSG00000006782,ENSMUSG00000069874,ENSMUSG00000078853,ENSMUSG00000035242,ENSMUSG00000057367,ENSMUSG00000030188,ENSMUSG00000035208,…
GO:BP	positive regulation of immune response	GO:0050778	0.00131276	2.88182	783	317	27	27205	ENSMUSG00000036931,ENSMUSG00000020707,ENSMUSG00000024349,ENSMUSG00000021624,ENSMUSG00000069874,ENSMUSG00000078853,ENSMUSG00000032175,ENSMUSG00000090231,ENSMUSG00000028790,ENSMUSG00000034330,ENSMUSG00000024339,ENSMUSG00000000791,ENSMUSG00000059714,ENSMUSG00000092511,ENSMUSG00000025058,ENSMUSG00000061232,ENSMUSG00000004296,ENSMUSG00000067212,ENSMUSG00000026797,ENSMUSG00000020919,ENSMUSG00000051314,…
GO:BP	macromolecule modification	GO:0043412	0.00131319	2.88167	3805	317	77	27205	ENSMUSG00000061589,ENSMUSG00000020707,ENSMUSG00000029798,ENSMUSG00000029410,ENSMUSG00000031671,ENSMUSG00000032507,ENSMUSG00000029500,ENSMUSG00000028788,ENSMUSG00000032462,ENSMUSG00000000555,ENSMUSG00000020397,ENSMUSG00000029580,ENSMUSG00000042719,ENSMUSG00000039231,ENSMUSG00000021039,ENSMUSG00000024218,ENSMUSG00000032187,ENSMUSG00000069874,ENSMUSG00000078853,ENSMUSG00000032175,ENSMUSG00000062352,…
GO:BP	regulation of innate immune response	GO:0045088	0.00149921	2.82414	383	317	18	27205	ENSMUSG00000020707,ENSMUSG00000024349,ENSMUSG00000021624,ENSMUSG00000027639,ENSMUSG00000069874,ENSMUSG00000078853,ENSMUSG00000034330,ENSMUSG00000024339,ENSMUSG00000019471,ENSMUSG00000059714,ENSMUSG00000025058,ENSMUSG00000004296,ENSMUSG00000017776,ENSMUSG00000020919,ENSMUSG00000051314,ENSMUSG00000047798,ENSMUSG00000004043,ENSMUSG00000024083
GO:BP	organonitrogen compound metabolic process	GO:1901564	0.00167099	2.77703	6489	317	114	27205	ENSMUSG00000029413,ENSMUSG00000090877,ENSMUSG00000021036,ENSMUSG00000061589,ENSMUSG00000020707,ENSMUSG00000029798,ENSMUSG00000029249,ENSMUSG00000029410,ENSMUSG00000031671,ENSMUSG00000073599,ENSMUSG00000032507,ENSMUSG00000029500,ENSMUSG00000028788,ENSMUSG00000032462,ENSMUSG00000021583,ENSMUSG00000000555,ENSMUSG00000020397,ENSMUSG00000029580,ENSMUSG00000039497,ENSMUSG00000024942,ENSMUSG00000042719,…
GO:BP	regulation of defense response	GO:0031347	0.0017535	2.75609	746	317	26	27205	ENSMUSG00000056692,ENSMUSG00000020707,ENSMUSG00000031671,ENSMUSG00000032507,ENSMUSG00000024349,ENSMUSG00000021624,ENSMUSG00000027639,ENSMUSG00000069874,ENSMUSG00000078853,ENSMUSG00000035042,ENSMUSG00000034330,ENSMUSG00000024339,ENSMUSG00000000791,ENSMUSG00000019471,ENSMUSG00000059714,ENSMUSG00000050737,ENSMUSG00000025058,ENSMUSG00000004296,ENSMUSG00000029860,ENSMUSG00000017776,ENSMUSG00000020919,…
GO:BP	organelle organization	GO:0006996	0.00203798	2.6908	3508	317	72	27205	ENSMUSG00000090877,ENSMUSG00000029500,ENSMUSG00000032849,ENSMUSG00000024349,ENSMUSG00000027287,ENSMUSG00000029580,ENSMUSG00000029405,ENSMUSG00000024942,ENSMUSG00000039231,ENSMUSG00000006782,ENSMUSG00000005299,ENSMUSG00000032187,ENSMUSG00000069874,ENSMUSG00000078853,ENSMUSG00000062352,ENSMUSG00000026159,ENSMUSG00000019173,ENSMUSG00000029407,ENSMUSG00000040276,ENSMUSG00000022257,ENSMUSG00000054855,…
GO:BP	regulation of immune response	GO:0050776	0.00212918	2.67179	955	317	30	27205	ENSMUSG00000036931,ENSMUSG00000020707,ENSMUSG00000024349,ENSMUSG00000021624,ENSMUSG00000027639,ENSMUSG00000069874,ENSMUSG00000078853,ENSMUSG00000032175,ENSMUSG00000090231,ENSMUSG00000028790,ENSMUSG00000034330,ENSMUSG00000024339,ENSMUSG00000000791,ENSMUSG00000019471,ENSMUSG00000059714,ENSMUSG00000092511,ENSMUSG00000025058,ENSMUSG00000061232,ENSMUSG00000004296,ENSMUSG00000067212,ENSMUSG00000026797,…
GO:BP	cellular component organization or biogenesis	GO:0071840	0.00237147	2.62498	7835	317	131	27205	ENSMUSG00000090877,ENSMUSG00000024217,ENSMUSG00000061589,ENSMUSG00000020707,ENSMUSG00000041415,ENSMUSG00000037400,ENSMUSG00000029249,ENSMUSG00000032507,ENSMUSG00000029500,ENSMUSG00000032849,ENSMUSG00000021728,ENSMUSG00000024349,ENSMUSG00000000555,ENSMUSG00000027287,ENSMUSG00000020397,ENSMUSG00000029580,ENSMUSG00000029405,ENSMUSG00000024942,ENSMUSG00000020211,ENSMUSG00000027639,ENSMUSG00000039231,…
GO:BP	response to interferon-beta	GO:0035456	0.0030513	2.51551	69	317	8	27205	ENSMUSG00000024349,ENSMUSG00000069874,ENSMUSG00000078853,ENSMUSG00000078921,ENSMUSG00000025492,ENSMUSG00000025491,ENSMUSG00000078920,ENSMUSG00000034459
GO:BP	regulation of immune system process	GO:0002682	0.00307046	2.5128	1581	317	41	27205	ENSMUSG00000036931,ENSMUSG00000020707,ENSMUSG00000032462,ENSMUSG00000024349,ENSMUSG00000029580,ENSMUSG00000024942,ENSMUSG00000021624,ENSMUSG00000027639,ENSMUSG00000032187,ENSMUSG00000069874,ENSMUSG00000078853,ENSMUSG00000032175,ENSMUSG00000090231,ENSMUSG00000028790,ENSMUSG00000035042,ENSMUSG00000034330,ENSMUSG00000024339,ENSMUSG00000000791,ENSMUSG00000019471,ENSMUSG00000059714,ENSMUSG00000092511,…
GO:BP	positive regulation of gene expression	GO:0010628	0.00318293	2.49717	1243	317	35	27205	ENSMUSG00000018930,ENSMUSG00000020707,ENSMUSG00000037279,ENSMUSG00000032462,ENSMUSG00000024349,ENSMUSG00000024399,ENSMUSG00000021039,ENSMUSG00000032175,ENSMUSG00000038587,ENSMUSG00000028790,ENSMUSG00000035042,ENSMUSG00000034330,ENSMUSG00000000791,ENSMUSG00000059714,ENSMUSG00000002028,ENSMUSG00000004296,ENSMUSG00000022136,ENSMUSG00000038848,ENSMUSG00000024816,ENSMUSG00000004936,ENSMUSG00000071072,…
GO:BP	helper T cell diapedesis	GO:0035685	0.00340722	2.4676	3	317	3	27205	ENSMUSG00000035042,ENSMUSG00000017776,ENSMUSG00000006134
GO:BP	positive regulation of biological process	GO:0048518	0.00346626	2.46014	6732	317	116	27205	ENSMUSG00000026526,ENSMUSG00000090877,ENSMUSG00000021036,ENSMUSG00000018930,ENSMUSG00000036931,ENSMUSG00000061589,ENSMUSG00000020707,ENSMUSG00000041415,ENSMUSG00000029249,ENSMUSG00000026525,ENSMUSG00000037279,ENSMUSG00000002658,ENSMUSG00000073599,ENSMUSG00000029500,ENSMUSG00000032849,ENSMUSG00000032462,ENSMUSG00000024349,ENSMUSG00000021583,ENSMUSG00000024399,ENSMUSG00000000555,ENSMUSG00000020397,…
GO:BP	viral gene expression	GO:0019080	0.00380495	2.41965	71	317	8	27205	ENSMUSG00000029249,ENSMUSG00000021039,ENSMUSG00000024218,ENSMUSG00000032187,ENSMUSG00000035042,ENSMUSG00000025492,ENSMUSG00000027667,ENSMUSG00000018293
GO:BP	positive regulation of cytokine production	GO:0001819	0.00390719	2.40814	496	317	20	27205	ENSMUSG00000018930,ENSMUSG00000020707,ENSMUSG00000024349,ENSMUSG00000024399,ENSMUSG00000032175,ENSMUSG00000038587,ENSMUSG00000035042,ENSMUSG00000034330,ENSMUSG00000000791,ENSMUSG00000059714,ENSMUSG00000004296,ENSMUSG00000024816,ENSMUSG00000020919,ENSMUSG00000051314,ENSMUSG00000004043,ENSMUSG00000025958,ENSMUSG00000030530,ENSMUSG00000034266,ENSMUSG00000034947,ENSMUSG00000068417
GO:BP	regulation of cellular component organization	GO:0051128	0.0040574	2.39175	2582	317	57	27205	ENSMUSG00000090877,ENSMUSG00000032507,ENSMUSG00000029500,ENSMUSG00000029580,ENSMUSG00000029405,ENSMUSG00000024942,ENSMUSG00000020211,ENSMUSG00000032187,ENSMUSG00000069874,ENSMUSG00000078853,ENSMUSG00000062352,ENSMUSG00000057367,ENSMUSG00000019173,ENSMUSG00000034330,ENSMUSG00000040276,ENSMUSG00000022257,ENSMUSG00000033933,ENSMUSG00000054855,ENSMUSG00000064302,ENSMUSG00000036167,ENSMUSG00000059325,…
GO:BP	regulation of macromolecule metabolic process	GO:0060255	0.0044695	2.34974	6765	317	116	27205	ENSMUSG00000026526,ENSMUSG00000056692,ENSMUSG00000090877,ENSMUSG00000018930,ENSMUSG00000036931,ENSMUSG00000061589,ENSMUSG00000025626,ENSMUSG00000020707,ENSMUSG00000041415,ENSMUSG00000029249,ENSMUSG00000029410,ENSMUSG00000031671,ENSMUSG00000037279,ENSMUSG00000002658,ENSMUSG00000073599,ENSMUSG00000032462,ENSMUSG00000024349,ENSMUSG00000024399,ENSMUSG00000000555,ENSMUSG00000020397,ENSMUSG00000029580,…
GO:BP	regulation of cellular metabolic process	GO:0031323	0.00504417	2.29721	5510	317	99	27205	ENSMUSG00000026526,ENSMUSG00000021036,ENSMUSG00000036931,ENSMUSG00000061589,ENSMUSG00000025626,ENSMUSG00000025059,ENSMUSG00000029249,ENSMUSG00000026525,ENSMUSG00000029410,ENSMUSG00000031671,ENSMUSG00000037279,ENSMUSG00000002658,ENSMUSG00000032507,ENSMUSG00000032462,ENSMUSG00000024349,ENSMUSG00000000555,ENSMUSG00000020397,ENSMUSG00000029580,ENSMUSG00000022255,ENSMUSG00000039231,ENSMUSG00000021039,…
GO:BP	cellular component organization	GO:0016043	0.0053243	2.27374	7634	317	127	27205	ENSMUSG00000090877,ENSMUSG00000024217,ENSMUSG00000061589,ENSMUSG00000020707,ENSMUSG00000041415,ENSMUSG00000037400,ENSMUSG00000029249,ENSMUSG00000032507,ENSMUSG00000029500,ENSMUSG00000032849,ENSMUSG00000021728,ENSMUSG00000024349,ENSMUSG00000000555,ENSMUSG00000027287,ENSMUSG00000020397,ENSMUSG00000029580,ENSMUSG00000029405,ENSMUSG00000024942,ENSMUSG00000020211,ENSMUSG00000027639,ENSMUSG00000039231,…
GO:BP	regulation of metabolic process	GO:0019222	0.00593559	2.22654	7262	317	122	27205	ENSMUSG00000026526,ENSMUSG00000056692,ENSMUSG00000090877,ENSMUSG00000021036,ENSMUSG00000018930,ENSMUSG00000036931,ENSMUSG00000061589,ENSMUSG00000025626,ENSMUSG00000020707,ENSMUSG00000041415,ENSMUSG00000025059,ENSMUSG00000029249,ENSMUSG00000026525,ENSMUSG00000029410,ENSMUSG00000031671,ENSMUSG00000037279,ENSMUSG00000002658,ENSMUSG00000073599,ENSMUSG00000032507,ENSMUSG00000029500,ENSMUSG00000032462,…
GO:BP	modulation by host of symbiont process	GO:0051851	0.00781409	2.10712	78	317	8	27205	ENSMUSG00000029249,ENSMUSG00000032507,ENSMUSG00000021039,ENSMUSG00000024218,ENSMUSG00000032187,ENSMUSG00000035042,ENSMUSG00000027667,ENSMUSG00000041720
GO:BP	interferon-mediated signaling pathway	GO:0140888	0.00860738	2.06513	79	317	8	27205	ENSMUSG00000024349,ENSMUSG00000027639,ENSMUSG00000069874,ENSMUSG00000078853,ENSMUSG00000032175,ENSMUSG00000019471,ENSMUSG00000025492,ENSMUSG00000025491
GO:BP	cellular response to organic substance	GO:0071310	0.00931276	2.03092	2459	317	54	27205	ENSMUSG00000090877,ENSMUSG00000018930,ENSMUSG00000041415,ENSMUSG00000029249,ENSMUSG00000024349,ENSMUSG00000029580,ENSMUSG00000022255,ENSMUSG00000021624,ENSMUSG00000027639,ENSMUSG00000021039,ENSMUSG00000032187,ENSMUSG00000069874,ENSMUSG00000078853,ENSMUSG00000032175,ENSMUSG00000038587,ENSMUSG00000078921,ENSMUSG00000057367,ENSMUSG00000035042,ENSMUSG00000034330,ENSMUSG00000029407,ENSMUSG00000000791,…
GO:BP	positive regulation of metabolic process	GO:0009893	0.00995943	2.00177	3941	317	76	27205	ENSMUSG00000026526,ENSMUSG00000090877,ENSMUSG00000021036,ENSMUSG00000018930,ENSMUSG00000061589,ENSMUSG00000020707,ENSMUSG00000041415,ENSMUSG00000029249,ENSMUSG00000026525,ENSMUSG00000037279,ENSMUSG00000002658,ENSMUSG00000073599,ENSMUSG00000032462,ENSMUSG00000024349,ENSMUSG00000024399,ENSMUSG00000000555,ENSMUSG00000020397,ENSMUSG00000029580,ENSMUSG00000022255,ENSMUSG00000039231,ENSMUSG00000021039,…
GO:BP	regulation of nitrogen compound metabolic process	GO:0051171	0.00998831	2.00051	5742	317	101	27205	ENSMUSG00000026526,ENSMUSG00000090877,ENSMUSG00000036931,ENSMUSG00000061589,ENSMUSG00000025626,ENSMUSG00000029249,ENSMUSG00000029410,ENSMUSG00000031671,ENSMUSG00000037279,ENSMUSG00000002658,ENSMUSG00000073599,ENSMUSG00000032462,ENSMUSG00000024349,ENSMUSG00000000555,ENSMUSG00000020397,ENSMUSG00000029580,ENSMUSG00000022255,ENSMUSG00000039231,ENSMUSG00000021039,ENSMUSG00000024218,ENSMUSG00000032187,…
GO:BP	regulation of biological process	GO:0050789	0.0101044	1.99549	13424	317	196	27205	ENSMUSG00000026526,ENSMUSG00000056692,ENSMUSG00000090877,ENSMUSG00000021036,ENSMUSG00000020577,ENSMUSG00000018930,ENSMUSG00000036931,ENSMUSG00000061589,ENSMUSG00000025626,ENSMUSG00000020707,ENSMUSG00000041415,ENSMUSG00000025059,ENSMUSG00000029249,ENSMUSG00000026525,ENSMUSG00000029410,ENSMUSG00000031762,ENSMUSG00000031671,ENSMUSG00000037279,ENSMUSG00000002658,ENSMUSG00000073599,ENSMUSG00000032507,…
GO:BP	positive regulation of immune system process	GO:0002684	0.010775	1.96758	1145	317	32	27205	ENSMUSG00000036931,ENSMUSG00000020707,ENSMUSG00000032462,ENSMUSG00000024349,ENSMUSG00000029580,ENSMUSG00000021624,ENSMUSG00000032187,ENSMUSG00000069874,ENSMUSG00000078853,ENSMUSG00000032175,ENSMUSG00000090231,ENSMUSG00000028790,ENSMUSG00000035042,ENSMUSG00000034330,ENSMUSG00000024339,ENSMUSG00000000791,ENSMUSG00000059714,ENSMUSG00000092511,ENSMUSG00000025058,ENSMUSG00000061232,ENSMUSG00000004296,…
GO:BP	regulation of programmed cell death	GO:0043067	0.0109889	1.95905	1665	317	41	27205	ENSMUSG00000090877,ENSMUSG00000036931,ENSMUSG00000029249,ENSMUSG00000026525,ENSMUSG00000073599,ENSMUSG00000032462,ENSMUSG00000000555,ENSMUSG00000029580,ENSMUSG00000022255,ENSMUSG00000024942,ENSMUSG00000032187,ENSMUSG00000038587,ENSMUSG00000057367,ENSMUSG00000035042,ENSMUSG00000034330,ENSMUSG00000024824,ENSMUSG00000041849,ENSMUSG00000063273,ENSMUSG00000033933,ENSMUSG00000028657,ENSMUSG00000004296,…
GO:BP	response to virus	GO:0009615	0.0114076	1.94281	399	317	17	27205	ENSMUSG00000056692,ENSMUSG00000020707,ENSMUSG00000002658,ENSMUSG00000024349,ENSMUSG00000027639,ENSMUSG00000069874,ENSMUSG00000078853,ENSMUSG00000078921,ENSMUSG00000035208,ENSMUSG00000035042,ENSMUSG00000000791,ENSMUSG00000025492,ENSMUSG00000033450,ENSMUSG00000004296,ENSMUSG00000025491,ENSMUSG00000069793,ENSMUSG00000034459
GO:BP	negative regulation of cellular metabolic process	GO:0031324	0.0117668	1.92934	2287	317	51	27205	ENSMUSG00000025626,ENSMUSG00000029249,ENSMUSG00000026525,ENSMUSG00000029410,ENSMUSG00000037279,ENSMUSG00000032462,ENSMUSG00000029580,ENSMUSG00000022255,ENSMUSG00000039231,ENSMUSG00000021039,ENSMUSG00000032187,ENSMUSG00000040097,ENSMUSG00000062352,ENSMUSG00000028790,ENSMUSG00000025332,ENSMUSG00000033933,ENSMUSG00000036167,ENSMUSG00000059325,ENSMUSG00000002028,ENSMUSG00000023991,ENSMUSG00000072620,…
GO:BP	positive regulation of cellular process	GO:0048522	0.0127577	1.89423	5997	317	104	27205	ENSMUSG00000026526,ENSMUSG00000090877,ENSMUSG00000021036,ENSMUSG00000018930,ENSMUSG00000036931,ENSMUSG00000061589,ENSMUSG00000041415,ENSMUSG00000029249,ENSMUSG00000026525,ENSMUSG00000037279,ENSMUSG00000002658,ENSMUSG00000073599,ENSMUSG00000029500,ENSMUSG00000032849,ENSMUSG00000032462,ENSMUSG00000024349,ENSMUSG00000000555,ENSMUSG00000020397,ENSMUSG00000029580,ENSMUSG00000022255,ENSMUSG00000029405,…
GO:BP	positive regulation of cell adhesion	GO:0045785	0.0128064	1.89257	491	317	19	27205	ENSMUSG00000036931,ENSMUSG00000041415,ENSMUSG00000000555,ENSMUSG00000029580,ENSMUSG00000024942,ENSMUSG00000032187,ENSMUSG00000032175,ENSMUSG00000062352,ENSMUSG00000035042,ENSMUSG00000000791,ENSMUSG00000059714,ENSMUSG00000004296,ENSMUSG00000017776,ENSMUSG00000020919,ENSMUSG00000029859,ENSMUSG00000004043,ENSMUSG00000006134,ENSMUSG00000022797,ENSMUSG00000025809
GO:BP	positive regulation of macromolecule metabolic process	GO:0010604	0.013156	1.88088	3624	317	71	27205	ENSMUSG00000026526,ENSMUSG00000090877,ENSMUSG00000018930,ENSMUSG00000061589,ENSMUSG00000020707,ENSMUSG00000029249,ENSMUSG00000037279,ENSMUSG00000002658,ENSMUSG00000073599,ENSMUSG00000032462,ENSMUSG00000024349,ENSMUSG00000024399,ENSMUSG00000000555,ENSMUSG00000020397,ENSMUSG00000029580,ENSMUSG00000022255,ENSMUSG00000039231,ENSMUSG00000021039,ENSMUSG00000024218,ENSMUSG00000032187,ENSMUSG00000069874,…
GO:BP	helper T cell extravasation	GO:0035684	0.0135109	1.86932	4	317	3	27205	ENSMUSG00000035042,ENSMUSG00000017776,ENSMUSG00000006134
GO:BP	regulation of cell adhesion	GO:0030155	0.0152476	1.8168	789	317	25	27205	ENSMUSG00000036931,ENSMUSG00000041415,ENSMUSG00000032462,ENSMUSG00000000555,ENSMUSG00000029580,ENSMUSG00000024942,ENSMUSG00000032187,ENSMUSG00000032175,ENSMUSG00000062352,ENSMUSG00000035042,ENSMUSG00000000791,ENSMUSG00000054855,ENSMUSG00000059714,ENSMUSG00000004296,ENSMUSG00000045394,ENSMUSG00000000738,ENSMUSG00000004936,ENSMUSG00000017776,ENSMUSG00000020919,ENSMUSG00000029859,ENSMUSG00000004043,…
GO:BP	cellular response to cytokine stimulus	GO:0071345	0.0154853	1.81008	1055	317	30	27205	ENSMUSG00000018930,ENSMUSG00000041415,ENSMUSG00000024349,ENSMUSG00000027639,ENSMUSG00000069874,ENSMUSG00000078853,ENSMUSG00000032175,ENSMUSG00000038587,ENSMUSG00000078921,ENSMUSG00000057367,ENSMUSG00000035042,ENSMUSG00000000791,ENSMUSG00000019471,ENSMUSG00000025492,ENSMUSG00000004296,ENSMUSG00000041598,ENSMUSG00000029860,ENSMUSG00000024778,ENSMUSG00000026797,ENSMUSG00000020919,ENSMUSG00000025491,…
GO:BP	response to cytokine	GO:0034097	0.0158663	1.79952	1167	317	32	27205	ENSMUSG00000018930,ENSMUSG00000041415,ENSMUSG00000024349,ENSMUSG00000027639,ENSMUSG00000069874,ENSMUSG00000078853,ENSMUSG00000032175,ENSMUSG00000038587,ENSMUSG00000078921,ENSMUSG00000057367,ENSMUSG00000035042,ENSMUSG00000000791,ENSMUSG00000019471,ENSMUSG00000025492,ENSMUSG00000004296,ENSMUSG00000041598,ENSMUSG00000029860,ENSMUSG00000024778,ENSMUSG00000026797,ENSMUSG00000020919,ENSMUSG00000025491,…
GO:BP	antigen processing and presentation of peptide antigen via MHC class I	GO:0002474	0.016034	1.79496	24	317	5	27205	ENSMUSG00000021583,ENSMUSG00000024339,ENSMUSG00000061232,ENSMUSG00000067212,ENSMUSG00000060550
GO:BP	regulation of response to external stimulus	GO:0032101	0.0169677	1.77038	1060	317	30	27205	ENSMUSG00000056692,ENSMUSG00000020707,ENSMUSG00000031671,ENSMUSG00000032507,ENSMUSG00000024349,ENSMUSG00000021624,ENSMUSG00000027639,ENSMUSG00000021039,ENSMUSG00000069874,ENSMUSG00000078853,ENSMUSG00000035042,ENSMUSG00000034330,ENSMUSG00000024339,ENSMUSG00000000791,ENSMUSG00000019471,ENSMUSG00000059325,ENSMUSG00000059714,ENSMUSG00000050737,ENSMUSG00000025058,ENSMUSG00000004296,ENSMUSG00000038848,…
GO:BP	response to organic substance	GO:0010033	0.0171864	1.76482	3583	317	70	27205	ENSMUSG00000090877,ENSMUSG00000018930,ENSMUSG00000041415,ENSMUSG00000025059,ENSMUSG00000029249,ENSMUSG00000024349,ENSMUSG00000029580,ENSMUSG00000022255,ENSMUSG00000024942,ENSMUSG00000021624,ENSMUSG00000027639,ENSMUSG00000021039,ENSMUSG00000006782,ENSMUSG00000032187,ENSMUSG00000069874,ENSMUSG00000078853,ENSMUSG00000032175,ENSMUSG00000038587,ENSMUSG00000078921,ENSMUSG00000057367,ENSMUSG00000035042,…
GO:BP	positive regulation of natural killer cell proliferation	GO:0032819	0.0180819	1.74276	12	317	4	27205	ENSMUSG00000032175,ENSMUSG00000000791,ENSMUSG00000004296,ENSMUSG00000020919
GO:BP	programmed cell death	GO:0012501	0.0198986	1.70118	2077	317	47	27205	ENSMUSG00000090877,ENSMUSG00000036931,ENSMUSG00000029249,ENSMUSG00000026525,ENSMUSG00000073599,ENSMUSG00000029500,ENSMUSG00000032462,ENSMUSG00000000555,ENSMUSG00000029580,ENSMUSG00000022255,ENSMUSG00000024942,ENSMUSG00000021039,ENSMUSG00000032187,ENSMUSG00000038587,ENSMUSG00000057367,ENSMUSG00000035042,ENSMUSG00000034330,ENSMUSG00000024824,ENSMUSG00000041849,ENSMUSG00000063273,ENSMUSG00000033933,…
GO:BP	regulation of primary metabolic process	GO:0080090	0.0244104	1.61242	5933	317	102	27205	ENSMUSG00000026526,ENSMUSG00000090877,ENSMUSG00000036931,ENSMUSG00000061589,ENSMUSG00000025626,ENSMUSG00000025059,ENSMUSG00000029249,ENSMUSG00000029410,ENSMUSG00000031671,ENSMUSG00000037279,ENSMUSG00000002658,ENSMUSG00000073599,ENSMUSG00000032462,ENSMUSG00000024349,ENSMUSG00000000555,ENSMUSG00000020397,ENSMUSG00000029580,ENSMUSG00000022255,ENSMUSG00000039231,ENSMUSG00000021039,ENSMUSG00000024218,…
GO:BP	cellular catabolic process	GO:0044248	0.025211	1.59841	1425	317	36	27205	ENSMUSG00000056692,ENSMUSG00000021036,ENSMUSG00000032507,ENSMUSG00000032462,ENSMUSG00000024349,ENSMUSG00000021583,ENSMUSG00000022255,ENSMUSG00000024942,ENSMUSG00000027639,ENSMUSG00000006782,ENSMUSG00000069874,ENSMUSG00000078853,ENSMUSG00000030188,ENSMUSG00000035208,ENSMUSG00000034330,ENSMUSG00000019471,ENSMUSG00000026664,ENSMUSG00000072620,ENSMUSG00000038848,ENSMUSG00000025630,ENSMUSG00000021143,…
GO:BP	biosynthetic process	GO:0009058	0.0298199	1.52549	5960	317	102	27205	ENSMUSG00000021036,ENSMUSG00000036931,ENSMUSG00000061589,ENSMUSG00000025626,ENSMUSG00000041415,ENSMUSG00000025059,ENSMUSG00000029249,ENSMUSG00000026525,ENSMUSG00000031671,ENSMUSG00000037279,ENSMUSG00000002658,ENSMUSG00000032507,ENSMUSG00000032462,ENSMUSG00000024349,ENSMUSG00000020397,ENSMUSG00000029580,ENSMUSG00000039497,ENSMUSG00000022255,ENSMUSG00000039231,ENSMUSG00000021039,ENSMUSG00000024218,…
GO:BP	cellular response to chemical stimulus	GO:0070887	0.033505	1.47489	3173	317	63	27205	ENSMUSG00000090877,ENSMUSG00000018930,ENSMUSG00000041415,ENSMUSG00000029249,ENSMUSG00000031762,ENSMUSG00000032462,ENSMUSG00000024349,ENSMUSG00000029580,ENSMUSG00000022255,ENSMUSG00000024942,ENSMUSG00000021624,ENSMUSG00000027639,ENSMUSG00000039231,ENSMUSG00000021039,ENSMUSG00000005299,ENSMUSG00000032187,ENSMUSG00000069874,ENSMUSG00000078853,ENSMUSG00000032175,ENSMUSG00000038587,ENSMUSG00000078921,…
GO:BP	positive regulation of innate immune response	GO:0045089	0.034088	1.4674	305	317	14	27205	ENSMUSG00000020707,ENSMUSG00000024349,ENSMUSG00000021624,ENSMUSG00000069874,ENSMUSG00000078853,ENSMUSG00000034330,ENSMUSG00000059714,ENSMUSG00000025058,ENSMUSG00000004296,ENSMUSG00000020919,ENSMUSG00000051314,ENSMUSG00000047798,ENSMUSG00000004043,ENSMUSG00000024083
GO:BP	regulation of multicellular organismal process	GO:0051239	0.0351335	1.45428	3246	317	64	27205	ENSMUSG00000026526,ENSMUSG00000056692,ENSMUSG00000018930,ENSMUSG00000036931,ENSMUSG00000020707,ENSMUSG00000041415,ENSMUSG00000029249,ENSMUSG00000037279,ENSMUSG00000073599,ENSMUSG00000029500,ENSMUSG00000032462,ENSMUSG00000024349,ENSMUSG00000021583,ENSMUSG00000024399,ENSMUSG00000000555,ENSMUSG00000029580,ENSMUSG00000022255,ENSMUSG00000039231,ENSMUSG00000032187,ENSMUSG00000032175,ENSMUSG00000038587,…
GO:BP	regulation of natural killer cell proliferation	GO:0032817	0.0358975	1.44494	14	317	4	27205	ENSMUSG00000032175,ENSMUSG00000000791,ENSMUSG00000004296,ENSMUSG00000020919
GO:BP	transport	GO:0006810	0.0382081	1.41784	4664	317	84	27205	ENSMUSG00000019802,ENSMUSG00000090877,ENSMUSG00000020577,ENSMUSG00000037400,ENSMUSG00000029249,ENSMUSG00000026525,ENSMUSG00000006169,ENSMUSG00000032849,ENSMUSG00000032462,ENSMUSG00000021728,ENSMUSG00000027287,ENSMUSG00000029580,ENSMUSG00000029405,ENSMUSG00000039678,ENSMUSG00000006782,ENSMUSG00000005299,ENSMUSG00000062352,ENSMUSG00000035242,ENSMUSG00000028790,ENSMUSG00000035042,ENSMUSG00000019173,…
GO:BP	regulation of apoptotic process	GO:0042981	0.0382504	1.41736	1633	317	39	27205	ENSMUSG00000090877,ENSMUSG00000036931,ENSMUSG00000029249,ENSMUSG00000026525,ENSMUSG00000073599,ENSMUSG00000032462,ENSMUSG00000000555,ENSMUSG00000029580,ENSMUSG00000022255,ENSMUSG00000024942,ENSMUSG00000032187,ENSMUSG00000038587,ENSMUSG00000057367,ENSMUSG00000035042,ENSMUSG00000024824,ENSMUSG00000041849,ENSMUSG00000063273,ENSMUSG00000033933,ENSMUSG00000028657,ENSMUSG00000004296,ENSMUSG00000022136,…
GO:BP	phosphate-containing compound metabolic process	GO:0006796	0.0414123	1.38287	2790	317	57	27205	ENSMUSG00000029413,ENSMUSG00000021036,ENSMUSG00000025059,ENSMUSG00000029410,ENSMUSG00000029500,ENSMUSG00000028788,ENSMUSG00000032462,ENSMUSG00000000555,ENSMUSG00000029580,ENSMUSG00000027639,ENSMUSG00000006782,ENSMUSG00000024218,ENSMUSG00000069874,ENSMUSG00000078853,ENSMUSG00000032175,ENSMUSG00000038587,ENSMUSG00000062352,ENSMUSG00000035042,ENSMUSG00000034330,ENSMUSG00000037826,ENSMUSG00000000791,…
GO:BP	establishment of localization	GO:0051234	0.0426662	1.36992	4823	317	86	27205	ENSMUSG00000019802,ENSMUSG00000090877,ENSMUSG00000020577,ENSMUSG00000037400,ENSMUSG00000029249,ENSMUSG00000026525,ENSMUSG00000006169,ENSMUSG00000032849,ENSMUSG00000032462,ENSMUSG00000021728,ENSMUSG00000027287,ENSMUSG00000029580,ENSMUSG00000029405,ENSMUSG00000039678,ENSMUSG00000006782,ENSMUSG00000005299,ENSMUSG00000062352,ENSMUSG00000035242,ENSMUSG00000028790,ENSMUSG00000035042,ENSMUSG00000019173,…
GO:BP	positive regulation of natural killer cell activation	GO:0032816	0.0427088	1.36948	29	317	5	27205	ENSMUSG00000032175,ENSMUSG00000000791,ENSMUSG00000004296,ENSMUSG00000020919,ENSMUSG00000004043
GO:BP	localization	GO:0051179	0.0445496	1.35116	5491	317	95	27205	ENSMUSG00000019802,ENSMUSG00000056692,ENSMUSG00000090877,ENSMUSG00000020577,ENSMUSG00000037400,ENSMUSG00000029249,ENSMUSG00000026525,ENSMUSG00000006169,ENSMUSG00000032849,ENSMUSG00000032462,ENSMUSG00000021728,ENSMUSG00000027287,ENSMUSG00000029580,ENSMUSG00000029405,ENSMUSG00000039678,ENSMUSG00000006782,ENSMUSG00000005299,ENSMUSG00000062352,ENSMUSG00000035242,ENSMUSG00000028790,ENSMUSG00000035042,…
GO:BP	organic substance biosynthetic process	GO:1901576	0.0446665	1.35002	5865	317	100	27205	ENSMUSG00000021036,ENSMUSG00000036931,ENSMUSG00000061589,ENSMUSG00000025626,ENSMUSG00000025059,ENSMUSG00000029249,ENSMUSG00000026525,ENSMUSG00000031671,ENSMUSG00000037279,ENSMUSG00000002658,ENSMUSG00000032507,ENSMUSG00000032462,ENSMUSG00000024349,ENSMUSG00000020397,ENSMUSG00000029580,ENSMUSG00000039497,ENSMUSG00000022255,ENSMUSG00000039231,ENSMUSG00000021039,ENSMUSG00000024218,ENSMUSG00000032187,…
GO:BP	cellular component biogenesis	GO:0044085	0.048927	1.31045	4334	317	79	27205	ENSMUSG00000090877,ENSMUSG00000024217,ENSMUSG00000020707,ENSMUSG00000041415,ENSMUSG00000029249,ENSMUSG00000032507,ENSMUSG00000032849,ENSMUSG00000024349,ENSMUSG00000000555,ENSMUSG00000027287,ENSMUSG00000020397,ENSMUSG00000029580,ENSMUSG00000029405,ENSMUSG00000024942,ENSMUSG00000020211,ENSMUSG00000027639,ENSMUSG00000039231,ENSMUSG00000024218,ENSMUSG00000005299,ENSMUSG00000032187,ENSMUSG00000069874,…
GO:BP	regulation of cell death	GO:0010941	0.0489646	1.31012	1836	317	42	27205	ENSMUSG00000090877,ENSMUSG00000036931,ENSMUSG00000029249,ENSMUSG00000026525,ENSMUSG00000073599,ENSMUSG00000032462,ENSMUSG00000000555,ENSMUSG00000029580,ENSMUSG00000022255,ENSMUSG00000024942,ENSMUSG00000032187,ENSMUSG00000038587,ENSMUSG00000057367,ENSMUSG00000035042,ENSMUSG00000034330,ENSMUSG00000024824,ENSMUSG00000041849,ENSMUSG00000063273,ENSMUSG00000033933,ENSMUSG00000028657,ENSMUSG00000004296,…
GO:BP	intracellular signal transduction	GO:0035556	0.0490459	1.3094	2607	317	54	27205	ENSMUSG00000018930,ENSMUSG00000036931,ENSMUSG00000061589,ENSMUSG00000041415,ENSMUSG00000029410,ENSMUSG00000031762,ENSMUSG00000037279,ENSMUSG00000032507,ENSMUSG00000032462,ENSMUSG00000022255,ENSMUSG00000029405,ENSMUSG00000024942,ENSMUSG00000021039,ENSMUSG00000069874,ENSMUSG00000078853,ENSMUSG00000032175,ENSMUSG00000038587,ENSMUSG00000062352,ENSMUSG00000057367,ENSMUSG00000035042,ENSMUSG00000034330,…
GO:CC	cytoplasm	GO:0005737	2.36568e-18	17.626	11620	320	219	27262	ENSMUSG00000019802,ENSMUSG00000026526,ENSMUSG00000056692,ENSMUSG00000029413,ENSMUSG00000090877,ENSMUSG00000021036,ENSMUSG00000061589,ENSMUSG00000020707,ENSMUSG00000029798,ENSMUSG00000041415,ENSMUSG00000086784,ENSMUSG00000037400,ENSMUSG00000025059,ENSMUSG00000029249,ENSMUSG00000026525,ENSMUSG00000006169,ENSMUSG00000029410,ENSMUSG00000031762,ENSMUSG00000031671,ENSMUSG00000017832,ENSMUSG00000073599,…
GO:CC	nucleoplasm	GO:0005654	3.96104e-12	11.4022	3810	320	98	27262	ENSMUSG00000066148,ENSMUSG00000056692,ENSMUSG00000090877,ENSMUSG00000024217,ENSMUSG00000061589,ENSMUSG00000025626,ENSMUSG00000029798,ENSMUSG00000029249,ENSMUSG00000006169,ENSMUSG00000031671,ENSMUSG00000017832,ENSMUSG00000002658,ENSMUSG00000073599,ENSMUSG00000032462,ENSMUSG00000024349,ENSMUSG00000027287,ENSMUSG00000020397,ENSMUSG00000022255,ENSMUSG00000021624,ENSMUSG00000020211,ENSMUSG00000027639,…
GO:CC	intracellular anatomical structure	GO:0005622	8.09411e-10	9.09183	17505	320	262	27262	ENSMUSG00000025898,ENSMUSG00000019802,ENSMUSG00000066148,ENSMUSG00000026526,ENSMUSG00000056692,ENSMUSG00000029413,ENSMUSG00000090877,ENSMUSG00000021036,ENSMUSG00000036931,ENSMUSG00000024217,ENSMUSG00000061589,ENSMUSG00000025626,ENSMUSG00000020707,ENSMUSG00000029798,ENSMUSG00000041415,ENSMUSG00000086784,ENSMUSG00000037400,ENSMUSG00000025059,ENSMUSG00000029249,ENSMUSG00000026525,ENSMUSG00000006169,…
GO:CC	cytosol	GO:0005829	8.5888e-09	8.06607	4127	320	95	27262	ENSMUSG00000026526,ENSMUSG00000056692,ENSMUSG00000090877,ENSMUSG00000029798,ENSMUSG00000029249,ENSMUSG00000029410,ENSMUSG00000031762,ENSMUSG00000031671,ENSMUSG00000017832,ENSMUSG00000073599,ENSMUSG00000032462,ENSMUSG00000024349,ENSMUSG00000029580,ENSMUSG00000029405,ENSMUSG00000024942,ENSMUSG00000039678,ENSMUSG00000042719,ENSMUSG00000069874,ENSMUSG00000078853,ENSMUSG00000032175,ENSMUSG00000038587,…
GO:CC	intracellular membrane-bounded organelle	GO:0043231	9.98598e-09	8.00061	14518	320	228	27262	ENSMUSG00000025898,ENSMUSG00000019802,ENSMUSG00000066148,ENSMUSG00000026526,ENSMUSG00000056692,ENSMUSG00000029413,ENSMUSG00000090877,ENSMUSG00000021036,ENSMUSG00000036931,ENSMUSG00000024217,ENSMUSG00000061589,ENSMUSG00000025626,ENSMUSG00000029798,ENSMUSG00000041415,ENSMUSG00000086784,ENSMUSG00000037400,ENSMUSG00000025059,ENSMUSG00000029249,ENSMUSG00000006169,ENSMUSG00000029410,ENSMUSG00000031762,…
GO:CC	intracellular organelle	GO:0043229	8.96387e-08	7.0475	15891	320	240	27262	ENSMUSG00000025898,ENSMUSG00000019802,ENSMUSG00000066148,ENSMUSG00000026526,ENSMUSG00000056692,ENSMUSG00000029413,ENSMUSG00000090877,ENSMUSG00000021036,ENSMUSG00000036931,ENSMUSG00000024217,ENSMUSG00000061589,ENSMUSG00000025626,ENSMUSG00000020707,ENSMUSG00000029798,ENSMUSG00000041415,ENSMUSG00000086784,ENSMUSG00000037400,ENSMUSG00000025059,ENSMUSG00000029249,ENSMUSG00000006169,ENSMUSG00000029410,…
GO:CC	membrane-bounded organelle	GO:0043227	1.17904e-07	6.92847	14993	320	230	27262	ENSMUSG00000025898,ENSMUSG00000019802,ENSMUSG00000066148,ENSMUSG00000026526,ENSMUSG00000056692,ENSMUSG00000029413,ENSMUSG00000090877,ENSMUSG00000021036,ENSMUSG00000036931,ENSMUSG00000024217,ENSMUSG00000061589,ENSMUSG00000025626,ENSMUSG00000029798,ENSMUSG00000041415,ENSMUSG00000086784,ENSMUSG00000037400,ENSMUSG00000025059,ENSMUSG00000029249,ENSMUSG00000026525,ENSMUSG00000006169,ENSMUSG00000029410,…
GO:CC	organelle	GO:0043226	2.78735e-07	6.55481	16219	320	242	27262	ENSMUSG00000025898,ENSMUSG00000019802,ENSMUSG00000066148,ENSMUSG00000026526,ENSMUSG00000056692,ENSMUSG00000029413,ENSMUSG00000090877,ENSMUSG00000021036,ENSMUSG00000036931,ENSMUSG00000024217,ENSMUSG00000061589,ENSMUSG00000025626,ENSMUSG00000020707,ENSMUSG00000029798,ENSMUSG00000041415,ENSMUSG00000086784,ENSMUSG00000037400,ENSMUSG00000025059,ENSMUSG00000029249,ENSMUSG00000026525,ENSMUSG00000006169,…
GO:CC	intracellular vesicle	GO:0097708	4.6195e-06	5.33541	2088	320	55	27262	ENSMUSG00000037400,ENSMUSG00000028788,ENSMUSG00000032849,ENSMUSG00000024349,ENSMUSG00000000555,ENSMUSG00000027287,ENSMUSG00000039497,ENSMUSG00000039512,ENSMUSG00000006782,ENSMUSG00000026159,ENSMUSG00000019173,ENSMUSG00000034330,ENSMUSG00000029407,ENSMUSG00000060992,ENSMUSG00000040276,ENSMUSG00000022257,ENSMUSG00000054855,ENSMUSG00000056116,ENSMUSG00000030082,ENSMUSG00000072572,ENSMUSG00000021866,…
GO:CC	intracellular organelle lumen	GO:0070013	1.04758e-05	4.97981	6355	320	118	27262	ENSMUSG00000066148,ENSMUSG00000026526,ENSMUSG00000056692,ENSMUSG00000090877,ENSMUSG00000024217,ENSMUSG00000061589,ENSMUSG00000025626,ENSMUSG00000029798,ENSMUSG00000029249,ENSMUSG00000006169,ENSMUSG00000031671,ENSMUSG00000017832,ENSMUSG00000002658,ENSMUSG00000073599,ENSMUSG00000032849,ENSMUSG00000032462,ENSMUSG00000024349,ENSMUSG00000021583,ENSMUSG00000027287,ENSMUSG00000020397,ENSMUSG00000029580,…
GO:CC	membrane-enclosed lumen	GO:0031974	1.05731e-05	4.9758	6356	320	118	27262	ENSMUSG00000066148,ENSMUSG00000026526,ENSMUSG00000056692,ENSMUSG00000090877,ENSMUSG00000024217,ENSMUSG00000061589,ENSMUSG00000025626,ENSMUSG00000029798,ENSMUSG00000029249,ENSMUSG00000006169,ENSMUSG00000031671,ENSMUSG00000017832,ENSMUSG00000002658,ENSMUSG00000073599,ENSMUSG00000032849,ENSMUSG00000032462,ENSMUSG00000024349,ENSMUSG00000021583,ENSMUSG00000027287,ENSMUSG00000020397,ENSMUSG00000029580,…
GO:CC	organelle lumen	GO:0043233	1.05731e-05	4.9758	6356	320	118	27262	ENSMUSG00000066148,ENSMUSG00000026526,ENSMUSG00000056692,ENSMUSG00000090877,ENSMUSG00000024217,ENSMUSG00000061589,ENSMUSG00000025626,ENSMUSG00000029798,ENSMUSG00000029249,ENSMUSG00000006169,ENSMUSG00000031671,ENSMUSG00000017832,ENSMUSG00000002658,ENSMUSG00000073599,ENSMUSG00000032849,ENSMUSG00000032462,ENSMUSG00000024349,ENSMUSG00000021583,ENSMUSG00000027287,ENSMUSG00000020397,ENSMUSG00000029580,…
GO:CC	cytoplasmic vesicle	GO:0031410	1.13042e-05	4.94676	2085	320	54	27262	ENSMUSG00000037400,ENSMUSG00000028788,ENSMUSG00000032849,ENSMUSG00000024349,ENSMUSG00000000555,ENSMUSG00000027287,ENSMUSG00000039497,ENSMUSG00000039512,ENSMUSG00000006782,ENSMUSG00000026159,ENSMUSG00000019173,ENSMUSG00000029407,ENSMUSG00000060992,ENSMUSG00000040276,ENSMUSG00000022257,ENSMUSG00000054855,ENSMUSG00000056116,ENSMUSG00000030082,ENSMUSG00000072572,ENSMUSG00000021866,ENSMUSG00000059714,…
GO:CC	endomembrane system	GO:0012505	1.71162e-05	4.76659	4282	320	88	27262	ENSMUSG00000019802,ENSMUSG00000021036,ENSMUSG00000041415,ENSMUSG00000037400,ENSMUSG00000006169,ENSMUSG00000028788,ENSMUSG00000032849,ENSMUSG00000024349,ENSMUSG00000021583,ENSMUSG00000000555,ENSMUSG00000027287,ENSMUSG00000039497,ENSMUSG00000022255,ENSMUSG00000039512,ENSMUSG00000042719,ENSMUSG00000024218,ENSMUSG00000069874,ENSMUSG00000078853,ENSMUSG00000078921,ENSMUSG00000019173,ENSMUSG00000029407,…
GO:CC	vesicle	GO:0031982	1.96525e-05	4.70658	2239	320	56	27262	ENSMUSG00000041415,ENSMUSG00000037400,ENSMUSG00000028788,ENSMUSG00000032849,ENSMUSG00000024349,ENSMUSG00000000555,ENSMUSG00000027287,ENSMUSG00000039497,ENSMUSG00000039512,ENSMUSG00000006782,ENSMUSG00000026159,ENSMUSG00000019173,ENSMUSG00000034330,ENSMUSG00000029407,ENSMUSG00000060992,ENSMUSG00000040276,ENSMUSG00000022257,ENSMUSG00000054855,ENSMUSG00000056116,ENSMUSG00000030082,ENSMUSG00000072572,…
GO:CC	nuclear lumen	GO:0031981	0.000385182	3.41433	5811	320	105	27262	ENSMUSG00000066148,ENSMUSG00000056692,ENSMUSG00000090877,ENSMUSG00000024217,ENSMUSG00000061589,ENSMUSG00000025626,ENSMUSG00000029798,ENSMUSG00000029249,ENSMUSG00000006169,ENSMUSG00000031671,ENSMUSG00000017832,ENSMUSG00000002658,ENSMUSG00000073599,ENSMUSG00000032849,ENSMUSG00000032462,ENSMUSG00000024349,ENSMUSG00000027287,ENSMUSG00000020397,ENSMUSG00000029580,ENSMUSG00000022255,ENSMUSG00000021624,…
GO:CC	Golgi apparatus	GO:0005794	0.00173173	2.76152	1531	320	39	27262	ENSMUSG00000037400,ENSMUSG00000006169,ENSMUSG00000032849,ENSMUSG00000024349,ENSMUSG00000000555,ENSMUSG00000039497,ENSMUSG00000042719,ENSMUSG00000024218,ENSMUSG00000069874,ENSMUSG00000078853,ENSMUSG00000078921,ENSMUSG00000029407,ENSMUSG00000060992,ENSMUSG00000029502,ENSMUSG00000056116,ENSMUSG00000064302,ENSMUSG00000036167,ENSMUSG00000027884,ENSMUSG00000035929,ENSMUSG00000028657,ENSMUSG00000061232,…
GO:CC	MHC class Ib protein complex	GO:0032398	0.001749	2.75721	22	320	5	27262	ENSMUSG00000056116,ENSMUSG00000035929,ENSMUSG00000061232,ENSMUSG00000067212,ENSMUSG00000060550
GO:CC	nucleus	GO:0005634	0.0020097	2.69687	10150	320	158	27262	ENSMUSG00000025898,ENSMUSG00000066148,ENSMUSG00000026526,ENSMUSG00000056692,ENSMUSG00000090877,ENSMUSG00000036931,ENSMUSG00000024217,ENSMUSG00000061589,ENSMUSG00000025626,ENSMUSG00000029798,ENSMUSG00000086784,ENSMUSG00000025059,ENSMUSG00000029249,ENSMUSG00000006169,ENSMUSG00000029410,ENSMUSG00000031762,ENSMUSG00000031671,ENSMUSG00000037279,ENSMUSG00000017832,ENSMUSG00000002658,ENSMUSG00000073599,…
GO:CC	MHC class I protein complex	GO:0042612	0.0022134	2.65494	23	320	5	27262	ENSMUSG00000056116,ENSMUSG00000035929,ENSMUSG00000061232,ENSMUSG00000067212,ENSMUSG00000060550
GO:CC	classical-complement-pathway C3/C5 convertase complex	GO:0005601	0.00230191	2.63791	4	320	3	27262	ENSMUSG00000090231,ENSMUSG00000092511,ENSMUSG00000073418
GO:CC	membrane protein complex	GO:0098796	0.00230713	2.63693	1206	320	33	27262	ENSMUSG00000019802,ENSMUSG00000032462,ENSMUSG00000024349,ENSMUSG00000000555,ENSMUSG00000027287,ENSMUSG00000032175,ENSMUSG00000057367,ENSMUSG00000028790,ENSMUSG00000060992,ENSMUSG00000024339,ENSMUSG00000000791,ENSMUSG00000031232,ENSMUSG00000056116,ENSMUSG00000030082,ENSMUSG00000059714,ENSMUSG00000027884,ENSMUSG00000035929,ENSMUSG00000061232,ENSMUSG00000067212,ENSMUSG00000020088,ENSMUSG00000024778,…
GO:CC	phagocytic vesicle	GO:0045335	0.00280722	2.55172	113	320	9	27262	ENSMUSG00000030082,ENSMUSG00000021866,ENSMUSG00000061232,ENSMUSG00000041598,ENSMUSG00000067212,ENSMUSG00000029860,ENSMUSG00000026797,ENSMUSG00000026425,ENSMUSG00000060550
GO:CC	organelle membrane	GO:0031090	0.00337161	2.47216	3300	320	66	27262	ENSMUSG00000019802,ENSMUSG00000021036,ENSMUSG00000037400,ENSMUSG00000025059,ENSMUSG00000029500,ENSMUSG00000032849,ENSMUSG00000024349,ENSMUSG00000021583,ENSMUSG00000039497,ENSMUSG00000022255,ENSMUSG00000029499,ENSMUSG00000006782,ENSMUSG00000005299,ENSMUSG00000069874,ENSMUSG00000078853,ENSMUSG00000078921,ENSMUSG00000019173,ENSMUSG00000029407,ENSMUSG00000060992,ENSMUSG00000024339,ENSMUSG00000029319,…
GO:CC	cellular anatomical entity	GO:0110165	0.00372299	2.42911	22796	320	294	27262	ENSMUSG00000025898,ENSMUSG00000019802,ENSMUSG00000066148,ENSMUSG00000026526,ENSMUSG00000056692,ENSMUSG00000029413,ENSMUSG00000090877,ENSMUSG00000021036,ENSMUSG00000020577,ENSMUSG00000018930,ENSMUSG00000036931,ENSMUSG00000024217,ENSMUSG00000061589,ENSMUSG00000025626,ENSMUSG00000020707,ENSMUSG00000029798,ENSMUSG00000041415,ENSMUSG00000086784,ENSMUSG00000037400,ENSMUSG00000025059,ENSMUSG00000029249,…
GO:CC	protein-containing complex	GO:0032991	0.00399758	2.3982	7322	320	121	27262	ENSMUSG00000025898,ENSMUSG00000019802,ENSMUSG00000066148,ENSMUSG00000026526,ENSMUSG00000090877,ENSMUSG00000021036,ENSMUSG00000024217,ENSMUSG00000061589,ENSMUSG00000020707,ENSMUSG00000041415,ENSMUSG00000037400,ENSMUSG00000029249,ENSMUSG00000002658,ENSMUSG00000032507,ENSMUSG00000032462,ENSMUSG00000024349,ENSMUSG00000000555,ENSMUSG00000027287,ENSMUSG00000020397,ENSMUSG00000029580,ENSMUSG00000029405,…
GO:CC	endoplasmic reticulum	GO:0005783	0.00420806	2.37592	1894	320	44	27262	ENSMUSG00000019802,ENSMUSG00000021036,ENSMUSG00000041415,ENSMUSG00000037400,ENSMUSG00000024349,ENSMUSG00000021583,ENSMUSG00000000555,ENSMUSG00000039497,ENSMUSG00000022255,ENSMUSG00000069874,ENSMUSG00000078853,ENSMUSG00000078921,ENSMUSG00000029407,ENSMUSG00000024339,ENSMUSG00000031232,ENSMUSG00000056116,ENSMUSG00000030082,ENSMUSG00000025492,ENSMUSG00000027884,ENSMUSG00000035929,ENSMUSG00000061232,…
GO:CC	MHC class I peptide loading complex	GO:0042824	0.00831924	2.07992	15	320	4	27262	ENSMUSG00000024339,ENSMUSG00000035929,ENSMUSG00000061232,ENSMUSG00000060550
GO:CC	bounding membrane of organelle	GO:0098588	0.00902065	2.04476	1707	320	40	27262	ENSMUSG00000019802,ENSMUSG00000037400,ENSMUSG00000025059,ENSMUSG00000029500,ENSMUSG00000032849,ENSMUSG00000024349,ENSMUSG00000039497,ENSMUSG00000029499,ENSMUSG00000006782,ENSMUSG00000069874,ENSMUSG00000078853,ENSMUSG00000019173,ENSMUSG00000029407,ENSMUSG00000060992,ENSMUSG00000029502,ENSMUSG00000022257,ENSMUSG00000056116,ENSMUSG00000030082,ENSMUSG00000025492,ENSMUSG00000027884,ENSMUSG00000025058,…
GO:CC	endoplasmic reticulum membrane	GO:0005789	0.0109713	1.95974	1074	320	29	27262	ENSMUSG00000019802,ENSMUSG00000021036,ENSMUSG00000024349,ENSMUSG00000021583,ENSMUSG00000039497,ENSMUSG00000022255,ENSMUSG00000069874,ENSMUSG00000078853,ENSMUSG00000078921,ENSMUSG00000024339,ENSMUSG00000031232,ENSMUSG00000030082,ENSMUSG00000027884,ENSMUSG00000035929,ENSMUSG00000061232,ENSMUSG00000067212,ENSMUSG00000024083,ENSMUSG00000050017,ENSMUSG00000047963,ENSMUSG00000078920,ENSMUSG00000078812,…
GO:CC	catalytic complex	GO:1902494	0.0114641	1.94066	1787	320	41	27262	ENSMUSG00000026526,ENSMUSG00000021036,ENSMUSG00000041415,ENSMUSG00000002658,ENSMUSG00000032507,ENSMUSG00000032462,ENSMUSG00000020397,ENSMUSG00000029580,ENSMUSG00000024942,ENSMUSG00000042719,ENSMUSG00000020211,ENSMUSG00000021039,ENSMUSG00000024218,ENSMUSG00000032187,ENSMUSG00000030188,ENSMUSG00000090231,ENSMUSG00000091896,ENSMUSG00000063273,ENSMUSG00000033933,ENSMUSG00000031232,ENSMUSG00000032468,…
GO:CC	endocytic vesicle	GO:0030139	0.0121148	1.91668	205	320	11	27262	ENSMUSG00000019173,ENSMUSG00000030082,ENSMUSG00000021866,ENSMUSG00000061232,ENSMUSG00000041598,ENSMUSG00000067212,ENSMUSG00000029860,ENSMUSG00000026797,ENSMUSG00000026425,ENSMUSG00000021638,ENSMUSG00000060550
GO:CC	endoplasmic reticulum subcompartment	GO:0098827	0.0121281	1.91621	1080	320	29	27262	ENSMUSG00000019802,ENSMUSG00000021036,ENSMUSG00000024349,ENSMUSG00000021583,ENSMUSG00000039497,ENSMUSG00000022255,ENSMUSG00000069874,ENSMUSG00000078853,ENSMUSG00000078921,ENSMUSG00000024339,ENSMUSG00000031232,ENSMUSG00000030082,ENSMUSG00000027884,ENSMUSG00000035929,ENSMUSG00000061232,ENSMUSG00000067212,ENSMUSG00000024083,ENSMUSG00000050017,ENSMUSG00000047963,ENSMUSG00000078920,ENSMUSG00000078812,…
GO:CC	endoplasmic reticulum protein-containing complex	GO:0140534	0.0124399	1.90518	136	320	9	27262	ENSMUSG00000019802,ENSMUSG00000021036,ENSMUSG00000024339,ENSMUSG00000031232,ENSMUSG00000030082,ENSMUSG00000035929,ENSMUSG00000061232,ENSMUSG00000024807,ENSMUSG00000060550
GO:CC	nuclear outer membrane-endoplasmic reticulum membrane network	GO:0042175	0.0179466	1.74602	1104	320	29	27262	ENSMUSG00000019802,ENSMUSG00000021036,ENSMUSG00000024349,ENSMUSG00000021583,ENSMUSG00000039497,ENSMUSG00000022255,ENSMUSG00000069874,ENSMUSG00000078853,ENSMUSG00000078921,ENSMUSG00000024339,ENSMUSG00000031232,ENSMUSG00000030082,ENSMUSG00000027884,ENSMUSG00000035929,ENSMUSG00000061232,ENSMUSG00000067212,ENSMUSG00000024083,ENSMUSG00000050017,ENSMUSG00000047963,ENSMUSG00000078920,ENSMUSG00000078812,…
GO:CC	MHC protein complex	GO:0042611	0.019026	1.72065	35	320	5	27262	ENSMUSG00000056116,ENSMUSG00000035929,ENSMUSG00000061232,ENSMUSG00000067212,ENSMUSG00000060550
GO:CC	Golgi membrane	GO:0000139	0.0333338	1.47712	546	320	18	27262	ENSMUSG00000024349,ENSMUSG00000039497,ENSMUSG00000069874,ENSMUSG00000078853,ENSMUSG00000029407,ENSMUSG00000060992,ENSMUSG00000029502,ENSMUSG00000056116,ENSMUSG00000027884,ENSMUSG00000061232,ENSMUSG00000045795,ENSMUSG00000029048,ENSMUSG00000024083,ENSMUSG00000022765,ENSMUSG00000050017,ENSMUSG00000030530,ENSMUSG00000039953,ENSMUSG00000060550
GO:CC	early endosome	GO:0005769	0.0449738	1.34704	413	320	15	27262	ENSMUSG00000037400,ENSMUSG00000028788,ENSMUSG00000019173,ENSMUSG00000022257,ENSMUSG00000056116,ENSMUSG00000059714,ENSMUSG00000025492,ENSMUSG00000061232,ENSMUSG00000004936,ENSMUSG00000034484,ENSMUSG00000025491,ENSMUSG00000030530,ENSMUSG00000060550,ENSMUSG00000022797,ENSMUSG00000031153
GO:CC	cytoplasmic vesicle membrane	GO:0030659	0.0471924	1.32613	881	320	24	27262	ENSMUSG00000037400,ENSMUSG00000032849,ENSMUSG00000024349,ENSMUSG00000039497,ENSMUSG00000019173,ENSMUSG00000029407,ENSMUSG00000060992,ENSMUSG00000040276,ENSMUSG00000022257,ENSMUSG00000056116,ENSMUSG00000030082,ENSMUSG00000025492,ENSMUSG00000025058,ENSMUSG00000061232,ENSMUSG00000045795,ENSMUSG00000067212,ENSMUSG00000020088,ENSMUSG00000034484,ENSMUSG00000022765,ENSMUSG00000030530,ENSMUSG00000060550,…
GO:CC	integrin alpha5-beta1 complex	GO:0034674	0.0497659	1.30307	2	320	2	27262	ENSMUSG00000000555,ENSMUSG00000025809
GO:CC	cytoplasm	GO:0005737	2.36568e-18	17.626	11620	320	219	27262	ENSMUSG00000019802,ENSMUSG00000026526,ENSMUSG00000056692,ENSMUSG00000029413,ENSMUSG00000090877,ENSMUSG00000021036,ENSMUSG00000061589,ENSMUSG00000020707,ENSMUSG00000029798,ENSMUSG00000041415,ENSMUSG00000086784,ENSMUSG00000037400,ENSMUSG00000025059,ENSMUSG00000029249,ENSMUSG00000026525,ENSMUSG00000006169,ENSMUSG00000029410,ENSMUSG00000031762,ENSMUSG00000031671,ENSMUSG00000017832,ENSMUSG00000073599,…
GO:CC	nucleoplasm	GO:0005654	3.96104e-12	11.4022	3810	320	98	27262	ENSMUSG00000066148,ENSMUSG00000056692,ENSMUSG00000090877,ENSMUSG00000024217,ENSMUSG00000061589,ENSMUSG00000025626,ENSMUSG00000029798,ENSMUSG00000029249,ENSMUSG00000006169,ENSMUSG00000031671,ENSMUSG00000017832,ENSMUSG00000002658,ENSMUSG00000073599,ENSMUSG00000032462,ENSMUSG00000024349,ENSMUSG00000027287,ENSMUSG00000020397,ENSMUSG00000022255,ENSMUSG00000021624,ENSMUSG00000020211,ENSMUSG00000027639,…
GO:CC	intracellular anatomical structure	GO:0005622	8.09411e-10	9.09183	17505	320	262	27262	ENSMUSG00000025898,ENSMUSG00000019802,ENSMUSG00000066148,ENSMUSG00000026526,ENSMUSG00000056692,ENSMUSG00000029413,ENSMUSG00000090877,ENSMUSG00000021036,ENSMUSG00000036931,ENSMUSG00000024217,ENSMUSG00000061589,ENSMUSG00000025626,ENSMUSG00000020707,ENSMUSG00000029798,ENSMUSG00000041415,ENSMUSG00000086784,ENSMUSG00000037400,ENSMUSG00000025059,ENSMUSG00000029249,ENSMUSG00000026525,ENSMUSG00000006169,…
GO:CC	cytosol	GO:0005829	8.5888e-09	8.06607	4127	320	95	27262	ENSMUSG00000026526,ENSMUSG00000056692,ENSMUSG00000090877,ENSMUSG00000029798,ENSMUSG00000029249,ENSMUSG00000029410,ENSMUSG00000031762,ENSMUSG00000031671,ENSMUSG00000017832,ENSMUSG00000073599,ENSMUSG00000032462,ENSMUSG00000024349,ENSMUSG00000029580,ENSMUSG00000029405,ENSMUSG00000024942,ENSMUSG00000039678,ENSMUSG00000042719,ENSMUSG00000069874,ENSMUSG00000078853,ENSMUSG00000032175,ENSMUSG00000038587,…
GO:CC	intracellular membrane-bounded organelle	GO:0043231	9.98598e-09	8.00061	14518	320	228	27262	ENSMUSG00000025898,ENSMUSG00000019802,ENSMUSG00000066148,ENSMUSG00000026526,ENSMUSG00000056692,ENSMUSG00000029413,ENSMUSG00000090877,ENSMUSG00000021036,ENSMUSG00000036931,ENSMUSG00000024217,ENSMUSG00000061589,ENSMUSG00000025626,ENSMUSG00000029798,ENSMUSG00000041415,ENSMUSG00000086784,ENSMUSG00000037400,ENSMUSG00000025059,ENSMUSG00000029249,ENSMUSG00000006169,ENSMUSG00000029410,ENSMUSG00000031762,…
GO:CC	intracellular organelle	GO:0043229	8.96387e-08	7.0475	15891	320	240	27262	ENSMUSG00000025898,ENSMUSG00000019802,ENSMUSG00000066148,ENSMUSG00000026526,ENSMUSG00000056692,ENSMUSG00000029413,ENSMUSG00000090877,ENSMUSG00000021036,ENSMUSG00000036931,ENSMUSG00000024217,ENSMUSG00000061589,ENSMUSG00000025626,ENSMUSG00000020707,ENSMUSG00000029798,ENSMUSG00000041415,ENSMUSG00000086784,ENSMUSG00000037400,ENSMUSG00000025059,ENSMUSG00000029249,ENSMUSG00000006169,ENSMUSG00000029410,…
GO:CC	membrane-bounded organelle	GO:0043227	1.17904e-07	6.92847	14993	320	230	27262	ENSMUSG00000025898,ENSMUSG00000019802,ENSMUSG00000066148,ENSMUSG00000026526,ENSMUSG00000056692,ENSMUSG00000029413,ENSMUSG00000090877,ENSMUSG00000021036,ENSMUSG00000036931,ENSMUSG00000024217,ENSMUSG00000061589,ENSMUSG00000025626,ENSMUSG00000029798,ENSMUSG00000041415,ENSMUSG00000086784,ENSMUSG00000037400,ENSMUSG00000025059,ENSMUSG00000029249,ENSMUSG00000026525,ENSMUSG00000006169,ENSMUSG00000029410,…
GO:CC	organelle	GO:0043226	2.78735e-07	6.55481	16219	320	242	27262	ENSMUSG00000025898,ENSMUSG00000019802,ENSMUSG00000066148,ENSMUSG00000026526,ENSMUSG00000056692,ENSMUSG00000029413,ENSMUSG00000090877,ENSMUSG00000021036,ENSMUSG00000036931,ENSMUSG00000024217,ENSMUSG00000061589,ENSMUSG00000025626,ENSMUSG00000020707,ENSMUSG00000029798,ENSMUSG00000041415,ENSMUSG00000086784,ENSMUSG00000037400,ENSMUSG00000025059,ENSMUSG00000029249,ENSMUSG00000026525,ENSMUSG00000006169,…
GO:CC	intracellular vesicle	GO:0097708	4.6195e-06	5.33541	2088	320	55	27262	ENSMUSG00000037400,ENSMUSG00000028788,ENSMUSG00000032849,ENSMUSG00000024349,ENSMUSG00000000555,ENSMUSG00000027287,ENSMUSG00000039497,ENSMUSG00000039512,ENSMUSG00000006782,ENSMUSG00000026159,ENSMUSG00000019173,ENSMUSG00000034330,ENSMUSG00000029407,ENSMUSG00000060992,ENSMUSG00000040276,ENSMUSG00000022257,ENSMUSG00000054855,ENSMUSG00000056116,ENSMUSG00000030082,ENSMUSG00000072572,ENSMUSG00000021866,…
GO:CC	intracellular organelle lumen	GO:0070013	1.04758e-05	4.97981	6355	320	118	27262	ENSMUSG00000066148,ENSMUSG00000026526,ENSMUSG00000056692,ENSMUSG00000090877,ENSMUSG00000024217,ENSMUSG00000061589,ENSMUSG00000025626,ENSMUSG00000029798,ENSMUSG00000029249,ENSMUSG00000006169,ENSMUSG00000031671,ENSMUSG00000017832,ENSMUSG00000002658,ENSMUSG00000073599,ENSMUSG00000032849,ENSMUSG00000032462,ENSMUSG00000024349,ENSMUSG00000021583,ENSMUSG00000027287,ENSMUSG00000020397,ENSMUSG00000029580,…
GO:CC	membrane-enclosed lumen	GO:0031974	1.05731e-05	4.9758	6356	320	118	27262	ENSMUSG00000066148,ENSMUSG00000026526,ENSMUSG00000056692,ENSMUSG00000090877,ENSMUSG00000024217,ENSMUSG00000061589,ENSMUSG00000025626,ENSMUSG00000029798,ENSMUSG00000029249,ENSMUSG00000006169,ENSMUSG00000031671,ENSMUSG00000017832,ENSMUSG00000002658,ENSMUSG00000073599,ENSMUSG00000032849,ENSMUSG00000032462,ENSMUSG00000024349,ENSMUSG00000021583,ENSMUSG00000027287,ENSMUSG00000020397,ENSMUSG00000029580,…
GO:CC	organelle lumen	GO:0043233	1.05731e-05	4.9758	6356	320	118	27262	ENSMUSG00000066148,ENSMUSG00000026526,ENSMUSG00000056692,ENSMUSG00000090877,ENSMUSG00000024217,ENSMUSG00000061589,ENSMUSG00000025626,ENSMUSG00000029798,ENSMUSG00000029249,ENSMUSG00000006169,ENSMUSG00000031671,ENSMUSG00000017832,ENSMUSG00000002658,ENSMUSG00000073599,ENSMUSG00000032849,ENSMUSG00000032462,ENSMUSG00000024349,ENSMUSG00000021583,ENSMUSG00000027287,ENSMUSG00000020397,ENSMUSG00000029580,…
GO:CC	cytoplasmic vesicle	GO:0031410	1.13042e-05	4.94676	2085	320	54	27262	ENSMUSG00000037400,ENSMUSG00000028788,ENSMUSG00000032849,ENSMUSG00000024349,ENSMUSG00000000555,ENSMUSG00000027287,ENSMUSG00000039497,ENSMUSG00000039512,ENSMUSG00000006782,ENSMUSG00000026159,ENSMUSG00000019173,ENSMUSG00000029407,ENSMUSG00000060992,ENSMUSG00000040276,ENSMUSG00000022257,ENSMUSG00000054855,ENSMUSG00000056116,ENSMUSG00000030082,ENSMUSG00000072572,ENSMUSG00000021866,ENSMUSG00000059714,…
GO:CC	endomembrane system	GO:0012505	1.71162e-05	4.76659	4282	320	88	27262	ENSMUSG00000019802,ENSMUSG00000021036,ENSMUSG00000041415,ENSMUSG00000037400,ENSMUSG00000006169,ENSMUSG00000028788,ENSMUSG00000032849,ENSMUSG00000024349,ENSMUSG00000021583,ENSMUSG00000000555,ENSMUSG00000027287,ENSMUSG00000039497,ENSMUSG00000022255,ENSMUSG00000039512,ENSMUSG00000042719,ENSMUSG00000024218,ENSMUSG00000069874,ENSMUSG00000078853,ENSMUSG00000078921,ENSMUSG00000019173,ENSMUSG00000029407,…
GO:CC	vesicle	GO:0031982	1.96525e-05	4.70658	2239	320	56	27262	ENSMUSG00000041415,ENSMUSG00000037400,ENSMUSG00000028788,ENSMUSG00000032849,ENSMUSG00000024349,ENSMUSG00000000555,ENSMUSG00000027287,ENSMUSG00000039497,ENSMUSG00000039512,ENSMUSG00000006782,ENSMUSG00000026159,ENSMUSG00000019173,ENSMUSG00000034330,ENSMUSG00000029407,ENSMUSG00000060992,ENSMUSG00000040276,ENSMUSG00000022257,ENSMUSG00000054855,ENSMUSG00000056116,ENSMUSG00000030082,ENSMUSG00000072572,…
GO:CC	nuclear lumen	GO:0031981	0.000385182	3.41433	5811	320	105	27262	ENSMUSG00000066148,ENSMUSG00000056692,ENSMUSG00000090877,ENSMUSG00000024217,ENSMUSG00000061589,ENSMUSG00000025626,ENSMUSG00000029798,ENSMUSG00000029249,ENSMUSG00000006169,ENSMUSG00000031671,ENSMUSG00000017832,ENSMUSG00000002658,ENSMUSG00000073599,ENSMUSG00000032849,ENSMUSG00000032462,ENSMUSG00000024349,ENSMUSG00000027287,ENSMUSG00000020397,ENSMUSG00000029580,ENSMUSG00000022255,ENSMUSG00000021624,…
GO:CC	Golgi apparatus	GO:0005794	0.00173173	2.76152	1531	320	39	27262	ENSMUSG00000037400,ENSMUSG00000006169,ENSMUSG00000032849,ENSMUSG00000024349,ENSMUSG00000000555,ENSMUSG00000039497,ENSMUSG00000042719,ENSMUSG00000024218,ENSMUSG00000069874,ENSMUSG00000078853,ENSMUSG00000078921,ENSMUSG00000029407,ENSMUSG00000060992,ENSMUSG00000029502,ENSMUSG00000056116,ENSMUSG00000064302,ENSMUSG00000036167,ENSMUSG00000027884,ENSMUSG00000035929,ENSMUSG00000028657,ENSMUSG00000061232,…
GO:CC	MHC class Ib protein complex	GO:0032398	0.001749	2.75721	22	320	5	27262	ENSMUSG00000056116,ENSMUSG00000035929,ENSMUSG00000061232,ENSMUSG00000067212,ENSMUSG00000060550
GO:CC	nucleus	GO:0005634	0.0020097	2.69687	10150	320	158	27262	ENSMUSG00000025898,ENSMUSG00000066148,ENSMUSG00000026526,ENSMUSG00000056692,ENSMUSG00000090877,ENSMUSG00000036931,ENSMUSG00000024217,ENSMUSG00000061589,ENSMUSG00000025626,ENSMUSG00000029798,ENSMUSG00000086784,ENSMUSG00000025059,ENSMUSG00000029249,ENSMUSG00000006169,ENSMUSG00000029410,ENSMUSG00000031762,ENSMUSG00000031671,ENSMUSG00000037279,ENSMUSG00000017832,ENSMUSG00000002658,ENSMUSG00000073599,…
GO:CC	MHC class I protein complex	GO:0042612	0.0022134	2.65494	23	320	5	27262	ENSMUSG00000056116,ENSMUSG00000035929,ENSMUSG00000061232,ENSMUSG00000067212,ENSMUSG00000060550
GO:CC	classical-complement-pathway C3/C5 convertase complex	GO:0005601	0.00230191	2.63791	4	320	3	27262	ENSMUSG00000090231,ENSMUSG00000092511,ENSMUSG00000073418
GO:CC	membrane protein complex	GO:0098796	0.00230713	2.63693	1206	320	33	27262	ENSMUSG00000019802,ENSMUSG00000032462,ENSMUSG00000024349,ENSMUSG00000000555,ENSMUSG00000027287,ENSMUSG00000032175,ENSMUSG00000057367,ENSMUSG00000028790,ENSMUSG00000060992,ENSMUSG00000024339,ENSMUSG00000000791,ENSMUSG00000031232,ENSMUSG00000056116,ENSMUSG00000030082,ENSMUSG00000059714,ENSMUSG00000027884,ENSMUSG00000035929,ENSMUSG00000061232,ENSMUSG00000067212,ENSMUSG00000020088,ENSMUSG00000024778,…
GO:CC	phagocytic vesicle	GO:0045335	0.00280722	2.55172	113	320	9	27262	ENSMUSG00000030082,ENSMUSG00000021866,ENSMUSG00000061232,ENSMUSG00000041598,ENSMUSG00000067212,ENSMUSG00000029860,ENSMUSG00000026797,ENSMUSG00000026425,ENSMUSG00000060550
GO:CC	organelle membrane	GO:0031090	0.00337161	2.47216	3300	320	66	27262	ENSMUSG00000019802,ENSMUSG00000021036,ENSMUSG00000037400,ENSMUSG00000025059,ENSMUSG00000029500,ENSMUSG00000032849,ENSMUSG00000024349,ENSMUSG00000021583,ENSMUSG00000039497,ENSMUSG00000022255,ENSMUSG00000029499,ENSMUSG00000006782,ENSMUSG00000005299,ENSMUSG00000069874,ENSMUSG00000078853,ENSMUSG00000078921,ENSMUSG00000019173,ENSMUSG00000029407,ENSMUSG00000060992,ENSMUSG00000024339,ENSMUSG00000029319,…
GO:CC	cellular anatomical entity	GO:0110165	0.00372299	2.42911	22796	320	294	27262	ENSMUSG00000025898,ENSMUSG00000019802,ENSMUSG00000066148,ENSMUSG00000026526,ENSMUSG00000056692,ENSMUSG00000029413,ENSMUSG00000090877,ENSMUSG00000021036,ENSMUSG00000020577,ENSMUSG00000018930,ENSMUSG00000036931,ENSMUSG00000024217,ENSMUSG00000061589,ENSMUSG00000025626,ENSMUSG00000020707,ENSMUSG00000029798,ENSMUSG00000041415,ENSMUSG00000086784,ENSMUSG00000037400,ENSMUSG00000025059,ENSMUSG00000029249,…
GO:CC	protein-containing complex	GO:0032991	0.00399758	2.3982	7322	320	121	27262	ENSMUSG00000025898,ENSMUSG00000019802,ENSMUSG00000066148,ENSMUSG00000026526,ENSMUSG00000090877,ENSMUSG00000021036,ENSMUSG00000024217,ENSMUSG00000061589,ENSMUSG00000020707,ENSMUSG00000041415,ENSMUSG00000037400,ENSMUSG00000029249,ENSMUSG00000002658,ENSMUSG00000032507,ENSMUSG00000032462,ENSMUSG00000024349,ENSMUSG00000000555,ENSMUSG00000027287,ENSMUSG00000020397,ENSMUSG00000029580,ENSMUSG00000029405,…
GO:CC	endoplasmic reticulum	GO:0005783	0.00420806	2.37592	1894	320	44	27262	ENSMUSG00000019802,ENSMUSG00000021036,ENSMUSG00000041415,ENSMUSG00000037400,ENSMUSG00000024349,ENSMUSG00000021583,ENSMUSG00000000555,ENSMUSG00000039497,ENSMUSG00000022255,ENSMUSG00000069874,ENSMUSG00000078853,ENSMUSG00000078921,ENSMUSG00000029407,ENSMUSG00000024339,ENSMUSG00000031232,ENSMUSG00000056116,ENSMUSG00000030082,ENSMUSG00000025492,ENSMUSG00000027884,ENSMUSG00000035929,ENSMUSG00000061232,…
GO:CC	MHC class I peptide loading complex	GO:0042824	0.00831924	2.07992	15	320	4	27262	ENSMUSG00000024339,ENSMUSG00000035929,ENSMUSG00000061232,ENSMUSG00000060550
GO:CC	bounding membrane of organelle	GO:0098588	0.00902065	2.04476	1707	320	40	27262	ENSMUSG00000019802,ENSMUSG00000037400,ENSMUSG00000025059,ENSMUSG00000029500,ENSMUSG00000032849,ENSMUSG00000024349,ENSMUSG00000039497,ENSMUSG00000029499,ENSMUSG00000006782,ENSMUSG00000069874,ENSMUSG00000078853,ENSMUSG00000019173,ENSMUSG00000029407,ENSMUSG00000060992,ENSMUSG00000029502,ENSMUSG00000022257,ENSMUSG00000056116,ENSMUSG00000030082,ENSMUSG00000025492,ENSMUSG00000027884,ENSMUSG00000025058,…
GO:CC	endoplasmic reticulum membrane	GO:0005789	0.0109713	1.95974	1074	320	29	27262	ENSMUSG00000019802,ENSMUSG00000021036,ENSMUSG00000024349,ENSMUSG00000021583,ENSMUSG00000039497,ENSMUSG00000022255,ENSMUSG00000069874,ENSMUSG00000078853,ENSMUSG00000078921,ENSMUSG00000024339,ENSMUSG00000031232,ENSMUSG00000030082,ENSMUSG00000027884,ENSMUSG00000035929,ENSMUSG00000061232,ENSMUSG00000067212,ENSMUSG00000024083,ENSMUSG00000050017,ENSMUSG00000047963,ENSMUSG00000078920,ENSMUSG00000078812,…
GO:CC	catalytic complex	GO:1902494	0.0114641	1.94066	1787	320	41	27262	ENSMUSG00000026526,ENSMUSG00000021036,ENSMUSG00000041415,ENSMUSG00000002658,ENSMUSG00000032507,ENSMUSG00000032462,ENSMUSG00000020397,ENSMUSG00000029580,ENSMUSG00000024942,ENSMUSG00000042719,ENSMUSG00000020211,ENSMUSG00000021039,ENSMUSG00000024218,ENSMUSG00000032187,ENSMUSG00000030188,ENSMUSG00000090231,ENSMUSG00000091896,ENSMUSG00000063273,ENSMUSG00000033933,ENSMUSG00000031232,ENSMUSG00000032468,…
GO:CC	endocytic vesicle	GO:0030139	0.0121148	1.91668	205	320	11	27262	ENSMUSG00000019173,ENSMUSG00000030082,ENSMUSG00000021866,ENSMUSG00000061232,ENSMUSG00000041598,ENSMUSG00000067212,ENSMUSG00000029860,ENSMUSG00000026797,ENSMUSG00000026425,ENSMUSG00000021638,ENSMUSG00000060550
GO:CC	endoplasmic reticulum subcompartment	GO:0098827	0.0121281	1.91621	1080	320	29	27262	ENSMUSG00000019802,ENSMUSG00000021036,ENSMUSG00000024349,ENSMUSG00000021583,ENSMUSG00000039497,ENSMUSG00000022255,ENSMUSG00000069874,ENSMUSG00000078853,ENSMUSG00000078921,ENSMUSG00000024339,ENSMUSG00000031232,ENSMUSG00000030082,ENSMUSG00000027884,ENSMUSG00000035929,ENSMUSG00000061232,ENSMUSG00000067212,ENSMUSG00000024083,ENSMUSG00000050017,ENSMUSG00000047963,ENSMUSG00000078920,ENSMUSG00000078812,…
GO:CC	endoplasmic reticulum protein-containing complex	GO:0140534	0.0124399	1.90518	136	320	9	27262	ENSMUSG00000019802,ENSMUSG00000021036,ENSMUSG00000024339,ENSMUSG00000031232,ENSMUSG00000030082,ENSMUSG00000035929,ENSMUSG00000061232,ENSMUSG00000024807,ENSMUSG00000060550
GO:CC	nuclear outer membrane-endoplasmic reticulum membrane network	GO:0042175	0.0179466	1.74602	1104	320	29	27262	ENSMUSG00000019802,ENSMUSG00000021036,ENSMUSG00000024349,ENSMUSG00000021583,ENSMUSG00000039497,ENSMUSG00000022255,ENSMUSG00000069874,ENSMUSG00000078853,ENSMUSG00000078921,ENSMUSG00000024339,ENSMUSG00000031232,ENSMUSG00000030082,ENSMUSG00000027884,ENSMUSG00000035929,ENSMUSG00000061232,ENSMUSG00000067212,ENSMUSG00000024083,ENSMUSG00000050017,ENSMUSG00000047963,ENSMUSG00000078920,ENSMUSG00000078812,…
GO:CC	MHC protein complex	GO:0042611	0.019026	1.72065	35	320	5	27262	ENSMUSG00000056116,ENSMUSG00000035929,ENSMUSG00000061232,ENSMUSG00000067212,ENSMUSG00000060550
GO:CC	Golgi membrane	GO:0000139	0.0333338	1.47712	546	320	18	27262	ENSMUSG00000024349,ENSMUSG00000039497,ENSMUSG00000069874,ENSMUSG00000078853,ENSMUSG00000029407,ENSMUSG00000060992,ENSMUSG00000029502,ENSMUSG00000056116,ENSMUSG00000027884,ENSMUSG00000061232,ENSMUSG00000045795,ENSMUSG00000029048,ENSMUSG00000024083,ENSMUSG00000022765,ENSMUSG00000050017,ENSMUSG00000030530,ENSMUSG00000039953,ENSMUSG00000060550
GO:CC	early endosome	GO:0005769	0.0449738	1.34704	413	320	15	27262	ENSMUSG00000037400,ENSMUSG00000028788,ENSMUSG00000019173,ENSMUSG00000022257,ENSMUSG00000056116,ENSMUSG00000059714,ENSMUSG00000025492,ENSMUSG00000061232,ENSMUSG00000004936,ENSMUSG00000034484,ENSMUSG00000025491,ENSMUSG00000030530,ENSMUSG00000060550,ENSMUSG00000022797,ENSMUSG00000031153
GO:CC	cytoplasmic vesicle membrane	GO:0030659	0.0471924	1.32613	881	320	24	27262	ENSMUSG00000037400,ENSMUSG00000032849,ENSMUSG00000024349,ENSMUSG00000039497,ENSMUSG00000019173,ENSMUSG00000029407,ENSMUSG00000060992,ENSMUSG00000040276,ENSMUSG00000022257,ENSMUSG00000056116,ENSMUSG00000030082,ENSMUSG00000025492,ENSMUSG00000025058,ENSMUSG00000061232,ENSMUSG00000045795,ENSMUSG00000067212,ENSMUSG00000020088,ENSMUSG00000034484,ENSMUSG00000022765,ENSMUSG00000030530,ENSMUSG00000060550,…
GO:CC	integrin alpha5-beta1 complex	GO:0034674	0.0497659	1.30307	2	320	2	27262	ENSMUSG00000000555,ENSMUSG00000025809
KEGG	Human immunodeficiency virus 1 infection	KEGG:05170	8.29857e-09	8.081	233	142	21	8947	ENSMUSG00000032462,ENSMUSG00000024349,ENSMUSG00000027639,ENSMUSG00000034330,ENSMUSG00000024339,ENSMUSG00000056116,ENSMUSG00000035929,ENSMUSG00000061232,ENSMUSG00000067212,ENSMUSG00000079492,ENSMUSG00000073405,ENSMUSG00000024778,ENSMUSG00000020271,ENSMUSG00000004936,ENSMUSG00000017776,ENSMUSG00000053835,ENSMUSG00000030602,ENSMUSG00000006134,ENSMUSG00000073402,ENSMUSG00000060550,ENSMUSG00000027669
KEGG	Antigen processing and presentation	KEGG:04612	4.53354e-08	7.34356	83	142	13	8947	ENSMUSG00000090877,ENSMUSG00000024339,ENSMUSG00000056116,ENSMUSG00000035929,ENSMUSG00000061232,ENSMUSG00000067212,ENSMUSG00000079492,ENSMUSG00000073405,ENSMUSG00000053835,ENSMUSG00000073402,ENSMUSG00000025958,ENSMUSG00000060550,ENSMUSG00000078153
KEGG	Allograft rejection	KEGG:05330	8.38152e-08	7.07668	56	142	11	8947	ENSMUSG00000056116,ENSMUSG00000035929,ENSMUSG00000061232,ENSMUSG00000004296,ENSMUSG00000067212,ENSMUSG00000079492,ENSMUSG00000073405,ENSMUSG00000024778,ENSMUSG00000053835,ENSMUSG00000073402,ENSMUSG00000060550
KEGG	Human cytomegalovirus infection	KEGG:05163	1.87565e-07	6.72685	249	142	20	8947	ENSMUSG00000018930,ENSMUSG00000032462,ENSMUSG00000024349,ENSMUSG00000035042,ENSMUSG00000024339,ENSMUSG00000056116,ENSMUSG00000035929,ENSMUSG00000061232,ENSMUSG00000067212,ENSMUSG00000079492,ENSMUSG00000073405,ENSMUSG00000024778,ENSMUSG00000004936,ENSMUSG00000017776,ENSMUSG00000053835,ENSMUSG00000006134,ENSMUSG00000073402,ENSMUSG00000025958,ENSMUSG00000060550,ENSMUSG00000027669
KEGG	Type I diabetes mellitus	KEGG:04940	3.15296e-07	6.50128	63	142	11	8947	ENSMUSG00000056116,ENSMUSG00000035929,ENSMUSG00000061232,ENSMUSG00000004296,ENSMUSG00000067212,ENSMUSG00000079492,ENSMUSG00000073405,ENSMUSG00000024778,ENSMUSG00000053835,ENSMUSG00000073402,ENSMUSG00000060550
KEGG	Phagosome	KEGG:04145	1.28992e-06	5.88944	174	142	16	8947	ENSMUSG00000000555,ENSMUSG00000029580,ENSMUSG00000019173,ENSMUSG00000024339,ENSMUSG00000056116,ENSMUSG00000030082,ENSMUSG00000035929,ENSMUSG00000061232,ENSMUSG00000067212,ENSMUSG00000079492,ENSMUSG00000073405,ENSMUSG00000053835,ENSMUSG00000073402,ENSMUSG00000060550,ENSMUSG00000022797,ENSMUSG00000025809
KEGG	Graft-versus-host disease	KEGG:05332	1.3398e-06	5.87296	56	142	10	8947	ENSMUSG00000056116,ENSMUSG00000035929,ENSMUSG00000061232,ENSMUSG00000067212,ENSMUSG00000079492,ENSMUSG00000073405,ENSMUSG00000024778,ENSMUSG00000053835,ENSMUSG00000073402,ENSMUSG00000060550
KEGG	Cellular senescence	KEGG:04218	1.04081e-05	4.98263	176	142	15	8947	ENSMUSG00000032462,ENSMUSG00000024942,ENSMUSG00000024824,ENSMUSG00000056116,ENSMUSG00000035929,ENSMUSG00000061232,ENSMUSG00000067212,ENSMUSG00000079492,ENSMUSG00000073405,ENSMUSG00000020271,ENSMUSG00000004936,ENSMUSG00000027641,ENSMUSG00000053835,ENSMUSG00000073402,ENSMUSG00000060550
KEGG	Autoimmune thyroid disease	KEGG:05320	1.62554e-05	4.789	72	142	10	8947	ENSMUSG00000056116,ENSMUSG00000035929,ENSMUSG00000061232,ENSMUSG00000067212,ENSMUSG00000079492,ENSMUSG00000073405,ENSMUSG00000024778,ENSMUSG00000053835,ENSMUSG00000073402,ENSMUSG00000060550
KEGG	Kaposi sarcoma-associated herpesvirus infection	KEGG:05167	2.85697e-05	4.54409	217	142	16	8947	ENSMUSG00000032462,ENSMUSG00000032175,ENSMUSG00000034330,ENSMUSG00000056116,ENSMUSG00000035929,ENSMUSG00000061232,ENSMUSG00000067212,ENSMUSG00000079492,ENSMUSG00000073405,ENSMUSG00000024778,ENSMUSG00000004936,ENSMUSG00000053835,ENSMUSG00000073402,ENSMUSG00000025958,ENSMUSG00000060550,ENSMUSG00000027669
KEGG	Viral myocarditis	KEGG:05416	5.04287e-05	4.29732	81	142	10	8947	ENSMUSG00000029580,ENSMUSG00000056116,ENSMUSG00000035929,ENSMUSG00000061232,ENSMUSG00000067212,ENSMUSG00000079492,ENSMUSG00000073405,ENSMUSG00000053835,ENSMUSG00000073402,ENSMUSG00000060550
KEGG	Human T-cell leukemia virus 1 infection	KEGG:05166	0.000130799	3.8834	243	142	16	8947	ENSMUSG00000032462,ENSMUSG00000056116,ENSMUSG00000035929,ENSMUSG00000061232,ENSMUSG00000067212,ENSMUSG00000079492,ENSMUSG00000073405,ENSMUSG00000004936,ENSMUSG00000020919,ENSMUSG00000053835,ENSMUSG00000004043,ENSMUSG00000073402,ENSMUSG00000027936,ENSMUSG00000025958,ENSMUSG00000020415,ENSMUSG00000060550
KEGG	Viral carcinogenesis	KEGG:05203	0.000195764	3.70827	221	142	15	8947	ENSMUSG00000032462,ENSMUSG00000021039,ENSMUSG00000056116,ENSMUSG00000035929,ENSMUSG00000061232,ENSMUSG00000067212,ENSMUSG00000079492,ENSMUSG00000073405,ENSMUSG00000027641,ENSMUSG00000020919,ENSMUSG00000053835,ENSMUSG00000004043,ENSMUSG00000073402,ENSMUSG00000025958,ENSMUSG00000060550
KEGG	Epstein-Barr virus infection	KEGG:05169	0.000231644	3.63518	224	142	15	8947	ENSMUSG00000032462,ENSMUSG00000021039,ENSMUSG00000032175,ENSMUSG00000034330,ENSMUSG00000024339,ENSMUSG00000056116,ENSMUSG00000035929,ENSMUSG00000061232,ENSMUSG00000067212,ENSMUSG00000079492,ENSMUSG00000073405,ENSMUSG00000024778,ENSMUSG00000053835,ENSMUSG00000073402,ENSMUSG00000060550
KEGG	Cell adhesion molecules	KEGG:04514	0.00184685	2.73357	174	142	12	8947	ENSMUSG00000056116,ENSMUSG00000035929,ENSMUSG00000061232,ENSMUSG00000067212,ENSMUSG00000079492,ENSMUSG00000073405,ENSMUSG00000053835,ENSMUSG00000036634,ENSMUSG00000073402,ENSMUSG00000021638,ENSMUSG00000060550,ENSMUSG00000025809
KEGG	Human papillomavirus infection	KEGG:05165	0.00405485	2.39203	354	142	17	8947	ENSMUSG00000032462,ENSMUSG00000000555,ENSMUSG00000032175,ENSMUSG00000056116,ENSMUSG00000035929,ENSMUSG00000061232,ENSMUSG00000067212,ENSMUSG00000079492,ENSMUSG00000073405,ENSMUSG00000024778,ENSMUSG00000004936,ENSMUSG00000027641,ENSMUSG00000053835,ENSMUSG00000073402,ENSMUSG00000025958,ENSMUSG00000060550,ENSMUSG00000025809
KEGG	ErbB signaling pathway	KEGG:04012	0.00495511	2.30495	84	142	8	8947	ENSMUSG00000032462,ENSMUSG00000034330,ENSMUSG00000004936,ENSMUSG00000017776,ENSMUSG00000020919,ENSMUSG00000030602,ENSMUSG00000004043,ENSMUSG00000006134
KEGG	Herpes simplex virus 1 infection	KEGG:05168	0.00676138	2.16996	444	142	19	8947	ENSMUSG00000032462,ENSMUSG00000024349,ENSMUSG00000000555,ENSMUSG00000032175,ENSMUSG00000057367,ENSMUSG00000035042,ENSMUSG00000024339,ENSMUSG00000056116,ENSMUSG00000035929,ENSMUSG00000061232,ENSMUSG00000004296,ENSMUSG00000067212,ENSMUSG00000079492,ENSMUSG00000073405,ENSMUSG00000024778,ENSMUSG00000053835,ENSMUSG00000073402,ENSMUSG00000028911,ENSMUSG00000060550
KEGG	TNF signaling pathway	KEGG:04668	0.00795868	2.09916	115	142	9	8947	ENSMUSG00000029500,ENSMUSG00000032462,ENSMUSG00000057367,ENSMUSG00000035042,ENSMUSG00000024778,ENSMUSG00000004936,ENSMUSG00000025958,ENSMUSG00000078920,ENSMUSG00000024235
KEGG	Renal cell carcinoma	KEGG:05211	0.00898529	2.04647	68	142	7	8947	ENSMUSG00000026526,ENSMUSG00000032462,ENSMUSG00000033933,ENSMUSG00000004936,ENSMUSG00000017776,ENSMUSG00000030602,ENSMUSG00000006134
KEGG	Endocytosis	KEGG:04144	0.0275723	1.55953	265	142	13	8947	ENSMUSG00000090877,ENSMUSG00000019173,ENSMUSG00000056116,ENSMUSG00000035929,ENSMUSG00000061232,ENSMUSG00000067212,ENSMUSG00000079492,ENSMUSG00000073405,ENSMUSG00000034484,ENSMUSG00000053835,ENSMUSG00000073402,ENSMUSG00000060550,ENSMUSG00000022797
KEGG	Protein processing in endoplasmic reticulum	KEGG:04141	0.0359742	1.44401	171	142	10	8947	ENSMUSG00000019802,ENSMUSG00000090877,ENSMUSG00000024942,ENSMUSG00000091896,ENSMUSG00000030082,ENSMUSG00000022136,ENSMUSG00000020088,ENSMUSG00000043019,ENSMUSG00000024807,ENSMUSG00000035325
KEGG	Growth hormone synthesis, secretion and action	KEGG:04935	0.0499697	1.30129	117	142	8	8947	ENSMUSG00000032462,ENSMUSG00000034330,ENSMUSG00000004936,ENSMUSG00000017776,ENSMUSG00000020919,ENSMUSG00000004043,ENSMUSG00000006134,ENSMUSG00000025958

## Sheet: ISG & STAT1 B2_Mm2 proximity
Gene ID	Gene name	Gene TSS coordinates	Species specificity	Nearest STAT1-bound B2_Mm2 element	Distance (kb)
ENSMUSG00000000078	Klf6	chr13:5861481-5861482	shared	B2_Mm2_chr13:6617377-6617573	755896
ENSMUSG00000000131	Xpo6	chr7:126200500-126200501	shared	B2_Mm2_chr7:126640367-126640541	439867
ENSMUSG00000000167	Pih1d2	chr9:50617320-50617321	human	B2_Mm2_chr9:50521686-50521877	95444
ENSMUSG00000000168	Dlat	chr9:50659779-50659780	human	B2_Mm2_chr9:50521686-50521877	137903
ENSMUSG00000000184	Ccnd2	chr6:127152192-127152193	mouse	B2_Mm2_chr6:126938134-126938300	213893
ENSMUSG00000000244	Tspan32	chr7:143005045-143005046	human	B2_Mm2_chr7:141512388-141512559	1492487
ENSMUSG00000000247	Lhx2	chr2:38339280-38339281	mouse	B2_Mm2_chr2:38836242-38836426	496962
ENSMUSG00000000278	Scpep1	chr11:88955464-88955465	shared	B2_Mm2_chr11:89006738-89006923	51274
ENSMUSG00000000318	Clec10a	chr11:70156196-70156197	mouse	B2_Mm2_chr11:70313942-70314125	157746
ENSMUSG00000000386	Mx1	chr16:97462906-97462907	mouse	B2_Mm2_chr16:97516427-97516617	53521
ENSMUSG00000000399	Ndufa9	chr6:126849135-126849136	human	B2_Mm2_chr6:126877758-126877946	28623
ENSMUSG00000000409	Lck	chr4:129573640-129573641	mouse	B2_Mm2_chr4:129384804-129384984	188657
ENSMUSG00000000489	Pdgfb	chr15:80014976-80014977	shared	B2_Mm2_chr15:79910903-79911052	103925
ENSMUSG00000000531	Grasp	chr15:101224187-101224188	human	B2_Mm2_chr15:101247687-101247887	23500
ENSMUSG00000000532	Acvr1b	chr15:101174066-101174067	human	B2_Mm2_chr15:101108347-101108476	65591
ENSMUSG00000000544	Gpa33	chr1:166130237-166130238	human	B2_Mm2_chr1:166158730-166158922	28493
ENSMUSG00000000555	Itga5	chr15:103366762-103366763	mouse	B2_Mm2_chr15:103387137-103387327	20375
ENSMUSG00000000562	Adora3	chr3:105870857-105870858	mouse	B2_Mm2_chr3:106790567-106790712	919710
ENSMUSG00000000563	Atp5f1	chr3:105960098-105960099	mouse	B2_Mm2_chr3:106790567-106790712	830469
ENSMUSG00000000581	C1d	chr11:17257578-17257579	mouse	B2_Mm2_chr11:19985713-19985900	2728135
ENSMUSG00000000594	Gm2a	chr11:55098114-55098115	human	B2_Mm2_chr11:55013204-55013381	84734
ENSMUSG00000000605	Clcn4	chr7:7300850-7300851	human	B2_Mm2_chr7:6381522-6381709	919142
ENSMUSG00000000628	Hk2	chr6:82774453-82774454	shared	B2_Mm2_chr6:83159520-83159697	385067
ENSMUSG00000000673	Haao	chr17:83846789-83846790	human	B2_Mm2_chr17:83968310-83968469	121521
ENSMUSG00000000682	Cd52	chr4:134095081-134095082	mouse	B2_Mm2_chr4:134104025-134104213	8944
ENSMUSG00000000708	Kat2b	chr17:53566860-53566861	shared	B2_Mm2_chr17:53519450-53519632	47229
ENSMUSG00000000732	Icosl	chr10:78069301-78069302	mouse	B2_Mm2_chr10:78030933-78031016	38286
ENSMUSG00000000738	Spg7	chr8:123062941-123062942	mouse	B2_Mm2_chr8:123044429-123044600	18342
ENSMUSG00000000776	Polr3d	chr14:70443446-70443447	human	B2_Mm2_chr14:71071780-71071967	628334
ENSMUSG00000000791	Il12rb1	chr8:70808448-70808449	mouse	B2_Mm2_chr8:70550167-70550266	258183
ENSMUSG00000000861	Bcl11a	chr11:24078055-24078056	mouse	B2_Mm2_chr11:23865241-23865425	212631
ENSMUSG00000000915	Hip1r	chr5:123973627-123973628	mouse	B2_Mm2_chr5:123933024-123933209	40419
ENSMUSG00000000934	Top1mt	chr15:75678799-75678800	human	B2_Mm2_chr15:76220572-76220731	541773
ENSMUSG00000000958	Slc7a7	chr14:54417779-54417780	human	B2_Mm2_chr14:54589374-54589548	171595
ENSMUSG00000001014	Icam4	chr9:21029372-21029373	mouse	B2_Mm2_chr9:21009463-21009653	19720
ENSMUSG00000001052	Sec24b	chr3:130061552-130061553	mouse	B2_Mm2_chr3:129723646-129723812	337741
ENSMUSG00000001053	N4bp3	chr11:51650841-51650842	human	B2_Mm2_chr11:51698113-51698267	47272
ENSMUSG00000001062	Vps9d1	chr8:123254347-123254348	human	B2_Mm2_chr8:123044429-123044600	209748
ENSMUSG00000001065	Zfp276	chr8:123254194-123254195	human	B2_Mm2_chr8:123044429-123044600	209595
ENSMUSG00000001089	Luzp1	chr4:136469760-136469761	mouse	B2_Mm2_chr4:136599974-136600171	130214
ENSMUSG00000001098	Kctd10	chr5:114380507-114380508	mouse	B2_Mm2_chr5:114176939-114177120	203388
ENSMUSG00000001156	Mxd1	chr6:86669160-86669161	mouse	B2_Mm2_chr6:86773134-86773210	103974
ENSMUSG00000001211	Agpat3	chr10:78352488-78352489	human	B2_Mm2_chr10:78420062-78420236	67574
ENSMUSG00000001229	Dpp9	chr17:56218888-56218889	mouse	B2_Mm2_chr17:56265814-56265996	46926
ENSMUSG00000001281	Itgb7	chr15:102231943-102231944	human	B2_Mm2_chr15:102226757-102226944	5000
ENSMUSG00000001305	Rrp15	chr1:186749357-186749358	human	B2_Mm2_chr1:184769588-184769773	1979585
ENSMUSG00000001348	Acp5	chr9:22135710-22135711	human	B2_Mm2_chr9:21920481-21920665	215046
ENSMUSG00000001415	Smg5	chr3:88336259-88336260	mouse	B2_Mm2_chr3:88304426-88304612	31648
ENSMUSG00000001424	Snd1	chr6:28475138-28475139	mouse	B2_Mm2_chr6:28837349-28837527	362211
ENSMUSG00000001440	Kpnb1	chr11:97187880-97187881	human	B2_Mm2_chr11:97192673-97192852	4793
ENSMUSG00000001444	Tbx21	chr11:97115330-97115331	shared	B2_Mm2_chr11:97126516-97126699	11186
ENSMUSG00000001473	Tubb6	chr18:67390716-67390717	mouse	B2_Mm2_chr18:67147536-67147711	243006
ENSMUSG00000001521	Tulp3	chr6:128355850-128355851	mouse	B2_Mm2_chr6:128380886-128381078	25036
ENSMUSG00000001588	Acap1	chr11:69895538-69895539	human	B2_Mm2_chr11:69926838-69927010	31300
ENSMUSG00000001627	Ifrd1	chr12:40248503-40248504	mouse	B2_Mm2_chr12:36037000-36037062	4211442
ENSMUSG00000001630	Stk38l	chr6:146724994-146724995	mouse	B2_Mm2_chr6:145245885-145246043	1478952
ENSMUSG00000001632	Brpf1	chr6:113307136-113307137	mouse	B2_Mm2_chr6:113074580-113074749	232388
ENSMUSG00000001687	Ubl3	chr5:148552788-148552789	mouse	B2_Mm2_chr5:147929199-147929376	623413
ENSMUSG00000001761	Smo	chr6:29735502-29735503	human	B2_Mm2_chr6:29981882-29982066	246380
ENSMUSG00000001783	Rtcb	chr10:85957822-85957823	mouse	B2_Mm2_chr10:86918332-86918499	960510
ENSMUSG00000001786	Fbxo7	chr10:86021971-86021972	mouse	B2_Mm2_chr10:86918332-86918499	896361
ENSMUSG00000001911	Nfix	chr8:84800343-84800344	human	B2_Mm2_chr8:83679189-83679373	1120971
ENSMUSG00000001918	Slc1a5	chr7:16781339-16781340	human	B2_Mm2_chr7:17076183-17076367	294844
ENSMUSG00000001924	Uba1	chrX:20658325-20658326	mouse	B2_Mm2_chrX:20346476-20346611	311715
ENSMUSG00000002028	Kmt2a	chr9:44881295-44881296	mouse	B2_Mm2_chr9:44919669-44919853	38374
ENSMUSG00000002100	Mybpc3	chr2:91118143-91118144	shared	B2_Mm2_chr2:91033137-91033302	84842
ENSMUSG00000002102	Psmc3	chr2:91054008-91054009	human	B2_Mm2_chr2:91033137-91033302	20707
ENSMUSG00000002103	Acp2	chr2:91202884-91202885	human	B2_Mm2_chr2:91237486-91237662	34602
ENSMUSG00000002108	Nr1h3	chr2:91202833-91202834	human	B2_Mm2_chr2:91237486-91237662	34653
ENSMUSG00000002109	Ddb2	chr2:91236981-91236982	human	B2_Mm2_chr2:91237486-91237662	505
ENSMUSG00000002111	Spi1	chr2:91082389-91082390	mouse	B2_Mm2_chr2:91033137-91033302	49088
ENSMUSG00000002129	Sf3a1	chr11:4160349-4160350	mouse	B2_Mm2_chr11:4544718-4544779	384369
ENSMUSG00000002210	Smg9	chr7:24399618-24399619	human	B2_Mm2_chr7:24851794-24851849	452176
ENSMUSG00000002227	Mov10	chr3:104818562-104818563	shared	B2_Mm2_chr3:104636052-104636243	182320
ENSMUSG00000002233	Rhoc	chr3:104788374-104788375	mouse	B2_Mm2_chr3:104636052-104636243	152132
ENSMUSG00000002297	Dbf4	chr5:8422715-8422716	human	B2_Mm2_chr5:20914299-20914473	12491584
ENSMUSG00000002307	Daxx	chr17:33909413-33909414	mouse	B2_Mm2_chr17:33897222-33897390	12024
ENSMUSG00000002325	Irf9	chr14:55603570-55603571	human	B2_Mm2_chr14:55917053-55917243	313483
ENSMUSG00000002489	Tiam1	chr16:90143768-90143769	mouse	B2_Mm2_chr16:91023507-91023643	879739
ENSMUSG00000002524	Puf60	chr15:76080923-76080924	mouse	B2_Mm2_chr15:76220572-76220731	139649
ENSMUSG00000002565	Scin	chr12:40134227-40134228	human	B2_Mm2_chr12:36037000-36037062	4097166
ENSMUSG00000002578	Ikzf4	chr10:128645990-128645991	mouse	B2_Mm2_chr10:128535585-128535783	110208
ENSMUSG00000002602	Axl	chr7:25788704-25788705	shared	B2_Mm2_chr7:25775123-25775311	13394
ENSMUSG00000002658	Gtf2f1	chr17:57011287-57011288	mouse	B2_Mm2_chr17:56301758-56301943	709345
ENSMUSG00000002699	Lcp2	chr11:34046919-34046920	shared	B2_Mm2_chr11:34030935-34030963	15957
ENSMUSG00000002797	Ggct	chr6:54992949-54992950	mouse	B2_Mm2_chr6:55192044-55192232	199095
ENSMUSG00000002812	Flii	chr11:60727262-60727263	mouse	B2_Mm2_chr11:60772304-60772481	45042
ENSMUSG00000002814	Top3a	chr11:60777364-60777365	mouse	B2_Mm2_chr11:60772304-60772481	4884
ENSMUSG00000002820	Atg4d	chr9:21265292-21265293	mouse	B2_Mm2_chr9:21095644-21095831	169462
ENSMUSG00000002844	Adprh	chr16:38452702-38452703	human	B2_Mm2_chr16:38561763-38561941	109061
ENSMUSG00000002845	Tmem39a	chr16:38558697-38558698	mouse	B2_Mm2_chr16:38561763-38561941	3066
ENSMUSG00000002881	Nab1	chr1:52500678-52500679	mouse	B2_Mm2_chr1:52765539-52765685	264861
ENSMUSG00000002885	Adgre5	chr8:83741325-83741326	human	B2_Mm2_chr8:83679189-83679373	61953
ENSMUSG00000002897	Il17ra	chr6:120463246-120463247	human	B2_Mm2_chr6:120471041-120471148	7795
ENSMUSG00000002908	Kcnn1	chr8:70863257-70863258	human	B2_Mm2_chr8:70550167-70550266	312992
ENSMUSG00000002983	Relb	chr7:19629437-19629438	shared	B2_Mm2_chr7:19665631-19665801	36194
ENSMUSG00000002984	Tomm40	chr7:19715437-19715438	human	B2_Mm2_chr7:19665631-19665801	49637
ENSMUSG00000002997	Prkar2b	chr12:32061295-32061296	human	B2_Mm2_chr12:31507112-31507297	553999
ENSMUSG00000003032	Klf4	chr4:55532465-55532466	shared	B2_Mm2_chr4:56115165-56115357	582700
ENSMUSG00000003037	Rab8a	chr8:72161199-72161200	human	B2_Mm2_chr8:72139127-72139317	21883
ENSMUSG00000003062	Stard3nl	chr13:19395794-19395795	mouse	B2_Mm2_chr13:24776694-24776882	5380900
ENSMUSG00000003070	Efna2	chr10:80179481-80179482	mouse	B2_Mm2_chr10:79817218-79817403	362079
ENSMUSG00000003119	Cdk12	chr11:98203058-98203059	mouse	B2_Mm2_chr11:97972958-97972971	230088
ENSMUSG00000003123	Lipe	chr7:25398709-25398710	mouse	B2_Mm2_chr7:25659667-25659854	260958
ENSMUSG00000003131	Pafah1b2	chr9:46012689-46012690	mouse	B2_Mm2_chr9:45981463-45981657	31033
ENSMUSG00000003161	Sri	chr5:8046077-8046078	human	B2_Mm2_chr5:20914299-20914473	12868222
ENSMUSG00000003206	Ebi3	chr17:55952622-55952623	human	B2_Mm2_chr17:56265814-56265996	313192
ENSMUSG00000003226	Ranbp2	chr10:58446919-58446920	mouse	B2_Mm2_chr10:58495757-58495934	48838
ENSMUSG00000003235	Eif2b5	chr16:20498816-20498817	mouse	B2_Mm2_chr16:20808322-20808488	309506
ENSMUSG00000003273	Car11	chr7:45699842-45699843	human	B2_Mm2_chr7:45898363-45898537	198521
ENSMUSG00000003283	Hck	chr2:153108467-153108468	mouse	B2_Mm2_chr2:153163974-153164157	55507
ENSMUSG00000003437	Paf1	chr7:28392950-28392951	mouse	B2_Mm2_chr7:28375021-28375199	17752
ENSMUSG00000003444	Med29	chr7:28392707-28392708	mouse	B2_Mm2_chr7:28375021-28375199	17509
ENSMUSG00000003617	Cp	chr3:19957053-19957054	human	B2_Mm2_chr3:20067554-20067724	110501
ENSMUSG00000003808	Farsa	chr8:84856988-84856989	mouse	B2_Mm2_chr8:83679189-83679373	1177616
ENSMUSG00000003812	Dnase2a	chr8:84908559-84908560	human	B2_Mm2_chr8:83679189-83679373	1229187
ENSMUSG00000003814	Calr	chr8:84846933-84846934	mouse	B2_Mm2_chr8:83679189-83679373	1167561
ENSMUSG00000003873	Bax	chr7:45466897-45466898	human	B2_Mm2_chr7:45247763-45247935	218963
ENSMUSG00000003992	Ssbp2	chr13:91460282-91460283	mouse	B2_Mm2_chr13:90927087-90927265	533018
ENSMUSG00000004018	Fancl	chr11:26386134-26386135	human	B2_Mm2_chr11:26183270-26183459	202676
ENSMUSG00000004040	Stat3	chr11:100939539-100939540	shared	B2_Mm2_chr11:101042269-101042440	102730
ENSMUSG00000004043	Stat5a	chr11:100859350-100859351	mouse	B2_Mm2_chr11:100702548-100702730	156621
ENSMUSG00000004096	Cwc15	chr9:14500616-14500617	mouse	B2_Mm2_chr9:21009290-21009461	6508674
ENSMUSG00000004113	Cacna1b	chr2:24763151-24763152	mouse	B2_Mm2_chr2:24931632-24931813	168481
ENSMUSG00000004266	Ptpn6	chr6:124738713-124738714	shared	B2_Mm2_chr6:124710484-124710653	28061
ENSMUSG00000004285	Atp6v1f	chr6:29467717-29467718	human	B2_Mm2_chr6:29242364-29242540	225178
ENSMUSG00000004296	Il12b	chr11:44400062-44400063	mouse	B2_Mm2_chr11:45753141-45753308	1353079
ENSMUSG00000004446	Bid	chr6:120916852-120916853	mouse	B2_Mm2_chr6:120789040-120789226	127627
ENSMUSG00000004451	Ralb	chr1:119504793-119504794	human	B2_Mm2_chr1:118564697-118564878	939916
ENSMUSG00000004460	Dnajb11	chr16:22857844-22857845	mouse	B2_Mm2_chr16:23088425-23088614	230581
ENSMUSG00000004535	Tax1bp1	chr6:52713728-52713729	human	B2_Mm2_chr6:52526181-52526370	187359
ENSMUSG00000004552	Ctse	chr1:131638305-131638306	mouse	B2_Mm2_chr1:132000611-132000798	362306
ENSMUSG00000004591	Pkn2	chr3:142882003-142882004	mouse	B2_Mm2_chr3:137942862-137943052	4938952
ENSMUSG00000004633	Chn2	chr6:54039553-54039554	mouse	B2_Mm2_chr6:55192044-55192232	1152491
ENSMUSG00000004661	Arid3b	chr9:57836792-57836793	human	B2_Mm2_chr9:57917500-57917681	80708
ENSMUSG00000004748	Mtfp1	chr11:4095444-4095445	human	B2_Mm2_chr11:4544718-4544779	449274
ENSMUSG00000004843	Chmp2b	chr16:65562725-65562726	shared	B2_Mm2_chr16:58500898-58501078	7061648
ENSMUSG00000004846	Plod3	chr5:136987018-136987019	mouse	B2_Mm2_chr5:137306113-137306265	319095
ENSMUSG00000004864	Mapk13	chr17:28769306-28769307	mouse	B2_Mm2_chr17:28903545-28903736	134239
ENSMUSG00000004936	Map2k1	chr9:64253630-64253631	mouse	B2_Mm2_chr9:64103660-64103833	149798
ENSMUSG00000004952	Rasa4	chr5:136083915-136083916	mouse	B2_Mm2_chr5:136092600-136092763	8685
ENSMUSG00000005054	Cstb	chr10:78425668-78425669	human	B2_Mm2_chr10:78420062-78420236	5433
ENSMUSG00000005057	Sh2b2	chr5:136246555-136246556	human	B2_Mm2_chr5:136191064-136191247	55309
ENSMUSG00000005089	Slc1a2	chr2:102658658-102658659	human	B2_Mm2_chr2:102978381-102978502	319723
ENSMUSG00000005103	Wdr1	chr5:38563220-38563221	mouse	B2_Mm2_chr5:36750468-36750585	1812636
ENSMUSG00000005107	Slc2a9	chr5:38503142-38503143	human	B2_Mm2_chr5:36750468-36750585	1752558
ENSMUSG00000005125	Ndrg1	chr15:66969639-66969640	mouse	B2_Mm2_chr15:68237445-68237633	1267806
ENSMUSG00000005148	Klf5	chr14:99298690-99298691	human	B2_Mm2_chr14:97898717-97898866	1399825
ENSMUSG00000005267	Zfp287	chr11:62731904-62731905	mouse	B2_Mm2_chr11:62435563-62435753	296152
ENSMUSG00000005299	Letm1	chr5:33782816-33782817	mouse	B2_Mm2_chr5:33802852-33803022	20036
ENSMUSG00000005312	Ubqln1	chr13:58215652-58215653	shared	B2_Mm2_chr13:58168912-58168985	46668
ENSMUSG00000005360	Slc1a3	chr15:8710763-8710764	human	B2_Mm2_chr15:10487401-10487572	1776638
ENSMUSG00000005362	Crbn	chr6:106800076-106800077	mouse	B2_Mm2_chr6:100578375-100578557	6221520
ENSMUSG00000005447	Pafah1b3	chr7:25297985-25297986	human	B2_Mm2_chr7:25659667-25659854	361682
ENSMUSG00000005483	Dnajb1	chr8:83608192-83608193	mouse	B2_Mm2_chr8:83679189-83679373	70997
ENSMUSG00000005510	Ndufs3	chr2:90904826-90904827	mouse	B2_Mm2_chr2:91033137-91033302	128311
ENSMUSG00000005540	Fcer2a	chr8:3694174-3694175	human	B2_Mm2_chr8:4763595-4763782	1069421
ENSMUSG00000005615	Pcyt1a	chr16:32430920-32430921	human	B2_Mm2_chr16:32436301-32436490	5381
ENSMUSG00000005656	Snx6	chr12:54795702-54795703	mouse	B2_Mm2_chr12:54876763-54876952	81061
ENSMUSG00000005667	Mthfd2	chr6:83325907-83325908	human	B2_Mm2_chr6:83159520-83159697	166211
ENSMUSG00000005774	Rfx5	chr3:94954074-94954075	shared	B2_Mm2_chr3:94947111-94947279	6796
ENSMUSG00000005779	Psmb4	chr3:94886960-94886961	shared	B2_Mm2_chr3:94947111-94947279	60151
ENSMUSG00000005802	Slc30a4	chr2:122702662-122702663	shared	B2_Mm2_chr2:122473621-122473803	228860
ENSMUSG00000005804	Bloc1s6	chr2:122738502-122738503	shared	B2_Mm2_chr2:122473621-122473803	264700
ENSMUSG00000005823	Gpr108	chr17:57247640-57247641	mouse	B2_Mm2_chr17:56301758-56301943	945698
ENSMUSG00000005824	Tnfsf14	chr17:57194188-57194189	mouse	B2_Mm2_chr17:56301758-56301943	892246
ENSMUSG00000005968	Tuft1	chr3:94658871-94658872	human	B2_Mm2_chr3:94534899-94535088	123784
ENSMUSG00000005973	Rcn1	chr2:105399318-105399319	shared	B2_Mm2_chr2:104841081-104841281	558038
ENSMUSG00000006005	Tpr	chr1:150392837-150392838	mouse	B2_Mm2_chr1:150374294-150374505	18333
ENSMUSG00000006014	Prg4	chr1:150466164-150466165	mouse	B2_Mm2_chr1:150374294-150374505	91660
ENSMUSG00000006024	Napa	chr7:16098457-16098458	human	B2_Mm2_chr7:16257354-16257541	158897
ENSMUSG00000006095	Tbcb	chr7:30232271-30232272	mouse	B2_Mm2_chr7:30238472-30238521	6201
ENSMUSG00000006134	Crkl	chr16:17451986-17451987	mouse	B2_Mm2_chr16:17432655-17432825	19162
ENSMUSG00000006154	Eps8l1	chr7:4460673-4460674	human	B2_Mm2_chr7:4409860-4409955	50719
ENSMUSG00000006169	Clint1	chr11:45852050-45852051	mouse	B2_Mm2_chr11:45753141-45753308	98743
ENSMUSG00000006205	Htra1	chr7:130936110-130936111	mouse	B2_Mm2_chr7:130930490-130930683	5428
ENSMUSG00000006215	Zbtb17	chr4:141444653-141444654	mouse	B2_Mm2_chr4:141508295-141508457	63642
ENSMUSG00000006262	Mob1b	chr5:88720854-88720855	mouse	B2_Mm2_chr5:88771585-88771781	50731
ENSMUSG00000006273	Atp6v1b2	chr8:69088645-69088646	human	B2_Mm2_chr8:69333761-69333950	245116
ENSMUSG00000006299	Aamp	chr1:74284737-74284738	human	B2_Mm2_chr1:74484064-74484249	199327
ENSMUSG00000006301	Tmbim1	chr1:74305621-74305622	human	B2_Mm2_chr1:74484064-74484249	178443
ENSMUSG00000006304	Arpc2	chr1:74236083-74236084	mouse	B2_Mm2_chr1:74484064-74484249	247981
ENSMUSG00000006344	Ggt5	chr10:75589339-75589340	human	B2_Mm2_chr10:75567096-75567278	22062
ENSMUSG00000006411	Pvrl4	chr1:171370098-171370099	mouse	B2_Mm2_chr1:171363544-171363727	6372
ENSMUSG00000006412	Pfdn2	chr1:171345669-171345670	human	B2_Mm2_chr1:171363544-171363727	17875
ENSMUSG00000006418	Rnf114	chr2:167492644-167492645	shared	B2_Mm2_chr2:167344976-167345161	147484
ENSMUSG00000006423	RP23-286I5.3	chrX:36874110-36874111	human	B2_Mm2_chrX:37085811-37085973	211701
ENSMUSG00000006599	Gtf2h1	chr7:46796102-46796103	human	B2_Mm2_chr7:45898363-45898537	897566
ENSMUSG00000006728	Cdk4	chr10:127063533-127063534	human	B2_Mm2_chr10:127066402-127066590	2869
ENSMUSG00000006732	Mettl1	chr10:127041413-127041414	human	B2_Mm2_chr10:127066402-127066590	24989
ENSMUSG00000006777	Krt23	chr11:99493136-99493137	human	B2_Mm2_chr11:99244590-99244778	248359
ENSMUSG00000006782	Cnp	chr11:100574903-100574904	mouse	B2_Mm2_chr11:100602538-100602738	27635
ENSMUSG00000006800	Sulf2	chr2:166155662-166155663	human	B2_Mm2_chr2:166140296-166140460	15203
ENSMUSG00000006818	Sod2	chr17:13007838-13007839	shared	B2_Mm2_chr17:12988179-12988366	19473
ENSMUSG00000006930	Hap1	chr11:100356127-100356128	mouse	B2_Mm2_chr11:100373536-100373627	17409
ENSMUSG00000006941	Eif1b	chr9:120492231-120492232	human	B2_Mm2_chr9:120511613-120511798	19382
ENSMUSG00000007021	Syngr3	chr17:24689954-24689955	human	B2_Mm2_chr17:24708575-24708747	18621
ENSMUSG00000007029	Vars	chr17:35000986-35000987	mouse	B2_Mm2_chr17:34952918-34953069	47918
ENSMUSG00000007036	Abhd16a	chr17:35089262-35089263	mouse	B2_Mm2_chr17:35185761-35185930	96499
ENSMUSG00000007279	Scube2	chr7:109865678-109865679	human	B2_Mm2_chr7:109948719-109948908	83041
ENSMUSG00000007338	Mrpl49	chr19:6057750-6057751	human	B2_Mm2_chr19:6064756-6064914	7006
ENSMUSG00000007411	Mark3	chr12:111574522-111574523	mouse	B2_Mm2_chr12:111561903-111562062	12461
ENSMUSG00000007458	M6pr	chr6:122308719-122308720	mouse	B2_Mm2_chr6:122601159-122601343	292440
ENSMUSG00000007564	Ppp2r1a	chr17:20945310-20945311	mouse	B2_Mm2_chr17:23652588-23652771	2707278
ENSMUSG00000007589	Tinf2	chr14:55681819-55681820	human	B2_Mm2_chr14:55917053-55917243	235234
ENSMUSG00000007617	Homer1	chr13:93299634-93299635	shared	B2_Mm2_chr13:92221703-92221860	1077775
ENSMUSG00000007659	Bcl2l1	chr2:152831727-152831728	shared	B2_Mm2_chr2:152847093-152847242	15366
ENSMUSG00000007721	Ccdc124	chr8:70873934-70873935	mouse	B2_Mm2_chr8:70550167-70550266	323669
ENSMUSG00000008036	Ap2s1	chr7:16738409-16738410	mouse	B2_Mm2_chr7:17076183-17076367	337774
ENSMUSG00000008153	Clstn3	chr6:124464793-124464794	human	B2_Mm2_chr6:124475478-124475626	10685
ENSMUSG00000008200	Fnbp4	chr2:90745369-90745370	mouse	B2_Mm2_chr2:90748715-90748911	3346
ENSMUSG00000008318	Relt	chr7:100863445-100863446	mouse	B2_Mm2_chr7:100532954-100533135	330311
ENSMUSG00000008348	Ubc	chr5:125390201-125390202	human	B2_Mm2_chr5:125385173-125385357	4845
ENSMUSG00000008373	Prpf31	chr7:3629984-3629985	mouse	B2_Mm2_chr7:3616988-3617149	12836
ENSMUSG00000008384	Sertad1	chr7:27486909-27486910	shared	B2_Mm2_chr7:27455139-27455325	31585
ENSMUSG00000008475	Arpc5	chr1:152766541-152766542	mouse	B2_Mm2_chr1:153546777-153546963	780236
ENSMUSG00000008690	Ncaph2	chr15:89355718-89355719	human	B2_Mm2_chr15:89430491-89430679	74773
ENSMUSG00000008730	Hipk1	chr3:103791562-103791563	mouse	B2_Mm2_chr3:104543711-104543901	752149
ENSMUSG00000009035	Tmem184b	chr15:79403568-79403569	mouse	B2_Mm2_chr15:79139686-79139879	263690
ENSMUSG00000009112	Bcl2l13	chr6:120836211-120836212	human	B2_Mm2_chr6:120789040-120789226	46986
ENSMUSG00000009185	Ccl8	chr11:82115184-82115185	mouse	B2_Mm2_chr11:81614542-81614720	500465
ENSMUSG00000009248	Ascl2	chr7:142969263-142969264	human	B2_Mm2_chr7:141512388-141512559	1456705
ENSMUSG00000009292	Trpm2	chr10:77970562-77970563	human	B2_Mm2_chr10:78017635-78017824	47073
ENSMUSG00000009293	Ube2g2	chr10:77622274-77622275	mouse	B2_Mm2_chr10:77728398-77728581	106124
ENSMUSG00000009350	Mpo	chr11:87793580-87793581	human	B2_Mm2_chr11:87967284-87967469	173704
ENSMUSG00000009376	Met	chr6:17463799-17463800	mouse	B2_Mm2_chr6:7791846-7792012	9671788
ENSMUSG00000009585	Apobec3	chr15:79891658-79891659	mouse	B2_Mm2_chr15:79910903-79911052	19245
ENSMUSG00000009772	Nuak2	chr1:132316125-132316126	mouse	B2_Mm2_chr1:132236275-132236457	79669
ENSMUSG00000009863	Sdhb	chr4:140961202-140961203	human	B2_Mm2_chr4:141508295-141508457	547093
ENSMUSG00000009905	Kdsr	chr1:106759726-106759727	human	B2_Mm2_chr1:105658629-105658817	1100910
ENSMUSG00000010021	Kif19a	chr11:114765387-114765388	mouse	B2_Mm2_chr11:114879606-114879771	114219
ENSMUSG00000010097	Nxf1	chr19:8757072-8757073	shared	B2_Mm2_chr19:8747545-8747697	9376
ENSMUSG00000010142	Tnfrsf13b	chr11:61126754-61126755	mouse	B2_Mm2_chr11:60772304-60772481	354274
ENSMUSG00000010205	Raver1	chr9:21092007-21092008	mouse	B2_Mm2_chr9:21095644-21095831	3637
ENSMUSG00000010277	RP23-185A18.9	chr11:78261751-78261752	mouse	B2_Mm2_chr11:78064912-78065111	196641
ENSMUSG00000010342	Tex14	chr11:87405064-87405065	shared	B2_Mm2_chr11:87421367-87421560	16303
ENSMUSG00000010358	Ifi35	chr11:101448406-101448407	shared	B2_Mm2_chr11:101415666-101415770	32637
ENSMUSG00000010392	Gosr1	chr11:76763578-76763579	mouse	B2_Mm2_chr11:76973718-76973909	210140
ENSMUSG00000010760	Phlda2	chr7:143503149-143503150	human	B2_Mm2_chr7:144890779-144890974	1387630
ENSMUSG00000010936	Vac14	chr8:110618584-110618585	human	B2_Mm2_chr8:111336749-111336945	718165
ENSMUSG00000011008	Mcoln2	chr3:146149832-146149833	human	B2_Mm2_chr3:152225001-152225190	6075169
ENSMUSG00000011096	Akt1s1	chr7:44848990-44848991	human	B2_Mm2_chr7:44978424-44978560	129434
ENSMUSG00000011179	Odc1	chr12:17544793-17544794	mouse	B2_Mm2_chr12:17350190-17350348	194446
ENSMUSG00000011884	Gltp	chr5:114690983-114690984	human	B2_Mm2_chr5:115064941-115065085	373958
ENSMUSG00000012296	Tjap1	chr17:46283025-46283026	mouse	B2_Mm2_chr17:46185450-46185625	97401
ENSMUSG00000012350	Ehf	chr2:103303277-103303278	human	B2_Mm2_chr2:102978381-102978502	324776
ENSMUSG00000012422	Tmem167	chr13:90089122-90089123	mouse	B2_Mm2_chr13:90926943-90927084	837821
ENSMUSG00000012428	Steap4	chr5:7960456-7960457	shared	B2_Mm2_chr5:20914299-20914473	12953843
ENSMUSG00000012519	Mlkl	chr8:111338176-111338177	shared	B2_Mm2_chr8:111336749-111336945	1232
ENSMUSG00000012535	Tnpo3	chr6:29609886-29609887	mouse	B2_Mm2_chr6:29242364-29242540	367347
ENSMUSG00000013539	Tango2	chr16:18348102-18348103	mouse	B2_Mm2_chr16:18694637-18694781	346535
ENSMUSG00000013662	Atad1	chr19:32712297-32712298	mouse	B2_Mm2_chr19:32732136-32732299	19839
ENSMUSG00000013736	Trnt1	chr6:106769119-106769120	mouse	B2_Mm2_chr6:100578375-100578557	6190563
ENSMUSG00000013846	St3gal1	chr15:67176829-67176830	human	B2_Mm2_chr15:68237445-68237633	1060616
ENSMUSG00000014158	Trpv4	chr5:114658420-114658421	human	B2_Mm2_chr5:115064941-115065085	406521
ENSMUSG00000014177	Tvp23b	chr11:62879454-62879455	human	B2_Mm2_chr11:62435563-62435753	443702
ENSMUSG00000014226	Cacybp	chr1:160212874-160212875	mouse	B2_Mm2_chr1:160935673-160935858	722799
ENSMUSG00000014301	Pam16	chr16:4624987-4624988	mouse	B2_Mm2_chr16:4721138-4721330	96151
ENSMUSG00000014349	Ube2z	chr11:96065387-96065388	shared	B2_Mm2_chr11:95978582-95978771	86617
ENSMUSG00000014418	Hps5	chr7:46796063-46796064	human	B2_Mm2_chr7:45898363-45898537	897527
ENSMUSG00000014504	Srp19	chr18:34330846-34330847	shared	B2_Mm2_chr18:34342888-34342932	12042
ENSMUSG00000014599	Csf1	chr3:107760468-107760469	shared	B2_Mm2_chr3:108237565-108237736	477097
ENSMUSG00000014601	Strip1	chr3:107631693-107631694	mouse	B2_Mm2_chr3:108237565-108237736	605872
ENSMUSG00000014602	Kif1a	chr1:93101950-93101951	mouse	B2_Mm2_chr1:97877110-97877282	4775160
ENSMUSG00000014769	Psmb1	chr17:15499750-15499751	human	B2_Mm2_chr17:12988179-12988366	2511385
ENSMUSG00000014776	Nol3	chr8:105276139-105276140	mouse	B2_Mm2_chr8:105263808-105263835	12305
ENSMUSG00000014837	RP23-127B8.5	chr8:105289863-105289864	mouse	B2_Mm2_chr8:105263808-105263835	26029
ENSMUSG00000014846	Tppp3	chr8:105471525-105471526	mouse	B2_Mm2_chr8:105607581-105607768	136056
ENSMUSG00000014856	Tmem208	chr8:105326353-105326354	human	B2_Mm2_chr8:105263808-105263835	62519
ENSMUSG00000014859	E2f4	chr8:105297662-105297663	mouse	B2_Mm2_chr8:105263808-105263835	33828
ENSMUSG00000014959	Gorasp2	chr2:70661575-70661576	mouse	B2_Mm2_chr2:71102440-71102623	440865
ENSMUSG00000015002	Efr3a	chr15:65787033-65787034	mouse	B2_Mm2_chr15:68237445-68237633	2450412
ENSMUSG00000015214	Mtmr1	chrX:71364759-71364760	shared	B2_Mm2_chrX:71352175-71352339	12421
ENSMUSG00000015247	Nipsnap3b	chr4:53011879-53011880	mouse	B2_Mm2_chr4:56115165-56115357	3103286
ENSMUSG00000015305	Sash1	chr10:8886069-8886070	human	B2_Mm2_chr10:8925637-8925822	39568
ENSMUSG00000015312	Gadd45b	chr10:80930072-80930073	shared	B2_Mm2_chr10:80991134-80991308	61062
ENSMUSG00000015314	Slamf6	chr1:171917514-171917515	mouse	B2_Mm2_chr1:171702393-171702570	214945
ENSMUSG00000015316	Slamf1	chr1:171767126-171767127	shared	B2_Mm2_chr1:171702393-171702570	64557
ENSMUSG00000015363	Trabd	chr15:89075123-89075124	mouse	B2_Mm2_chr15:88760499-88760680	314444
ENSMUSG00000015377	Dennd6b	chr15:89196495-89196496	mouse	B2_Mm2_chr15:89430491-89430679	233996
ENSMUSG00000015396	Cd83	chr13:43784774-43784775	shared	B2_Mm2_chr13:43318732-43318910	465865
ENSMUSG00000015501	Hivep2	chr10:13966074-13966075	shared	B2_Mm2_chr10:12954810-12955006	1011069
ENSMUSG00000015575	Atp6v0e	chr17:26676395-26676396	human	B2_Mm2_chr17:26705267-26705348	28872
ENSMUSG00000015605	Srf	chr17:46556161-46556162	human	B2_Mm2_chr17:46601627-46601811	45466
ENSMUSG00000015647	Lama5	chr2:180225858-180225859	human	B2_Mm2_chr2:180555335-180555509	329477
ENSMUSG00000015656	Hspa8	chr9:40800983-40800984	shared	B2_Mm2_chr9:40826703-40826892	25720
ENSMUSG00000015671	Psma2	chr13:14613239-14613240	shared	B2_Mm2_chr13:12550533-12550694	2062546
ENSMUSG00000015709	Arnt2	chr7:84410175-84410176	human	B2_Mm2_chr7:81052164-81052355	3357821
ENSMUSG00000015733	Capza2	chr6:17636233-17636234	mouse	B2_Mm2_chr6:7791846-7792012	9844222
ENSMUSG00000015745	Plekho1	chr3:95996000-95996001	human	B2_Mm2_chr3:95861315-95861493	134508
ENSMUSG00000015748	Prpf3	chr3:95855884-95855885	human	B2_Mm2_chr3:95861315-95861493	5431
ENSMUSG00000015755	Tab2	chr10:7956229-7956230	mouse	B2_Mm2_chr10:7069190-7069318	886912
ENSMUSG00000015839	Nfe2l2	chr2:75704640-75704641	human	B2_Mm2_chr2:75791657-75791844	87017
ENSMUSG00000015850	Adamtsl4	chr3:95687916-95687917	mouse	B2_Mm2_chr3:95671976-95672115	15802
ENSMUSG00000015889	Lta4h	chr10:93453410-93453411	human	B2_Mm2_chr10:93572377-93572556	118967
ENSMUSG00000015937	H2afy	chr13:56136360-56136361	mouse	B2_Mm2_chr13:56244657-56244842	108297
ENSMUSG00000015942	Gtf2ird2	chr5:134184018-134184019	mouse	B2_Mm2_chr5:134229841-134230034	45823
ENSMUSG00000015947	Fcgr1	chr3:96293968-96293969	mouse	B2_Mm2_chr3:95861315-95861493	432476
ENSMUSG00000015950	Ncf1	chr5:134229624-134229625	shared	B2_Mm2_chr5:134229841-134230034	217
ENSMUSG00000016024	Lbp	chr2:158306492-158306493	mouse	B2_Mm2_chr2:158025274-158025450	281043
ENSMUSG00000016194	Hsd11b1	chr1:193264074-193264075	human	B2_Mm2_chr1:194759636-194759808	1495562
ENSMUSG00000016206	H2-M3	chr17:37270219-37270220	mouse	B2_Mm2_chr17:36826578-36826763	443457
ENSMUSG00000016239	Lonrf3	chrX:36328352-36328353	human	B2_Mm2_chrX:37085811-37085973	757459
ENSMUSG00000016256	Ctsz	chr2:174439038-174439039	human	B2_Mm2_chr2:173220313-173220496	1218543
ENSMUSG00000016257	Prelid3b	chr2:174473080-174473081	human	B2_Mm2_chr2:173220313-173220496	1252585
ENSMUSG00000016382	Pls3	chrX:75875181-75875182	human	B2_Mm2_chrX:75385703-75385891	489291
ENSMUSG00000016477	E2f3	chr13:29986062-29986063	mouse	B2_Mm2_chr13:30762400-30762579	776338
ENSMUSG00000016495	Plgrkt	chr19:29367389-29367390	shared	B2_Mm2_chr19:28992295-28992477	374913
ENSMUSG00000016496	Cd274	chr19:29367454-29367455	shared	B2_Mm2_chr19:28992295-28992477	374978
ENSMUSG00000016498	Pdcd1lg2	chr19:29410918-29410919	shared	B2_Mm2_chr19:28992295-28992477	418442
ENSMUSG00000016528	Mapkapk2	chr1:131097825-131097826	mouse	B2_Mm2_chr1:132000611-132000798	902786
ENSMUSG00000016534	Lamp2	chrX:38456453-38456454	shared	B2_Mm2_chrX:37173164-37173270	1283184
ENSMUSG00000016554	Eif3d	chr15:77970812-77970813	mouse	B2_Mm2_chr15:77801475-77801660	169153
ENSMUSG00000016559	H3f3b	chr11:116027961-116027962	mouse	B2_Mm2_chr11:116032233-116032403	4272
ENSMUSG00000016831	Tox4	chr14:52279145-52279146	mouse	B2_Mm2_chr14:51883753-51883928	395218
ENSMUSG00000016833	Mrps18c	chr5:100798626-100798627	mouse	B2_Mm2_chr5:100663941-100664096	134531
ENSMUSG00000016946	Kctd5	chr17:24073484-24073485	shared	B2_Mm2_chr17:23759262-23759448	314037
ENSMUSG00000017002	Slpi	chr2:164389094-164389095	human	B2_Mm2_chr2:164423886-164424076	34792
ENSMUSG00000017009	Sdc4	chr2:164443886-164443887	shared	B2_Mm2_chr2:164423886-164424076	19811
ENSMUSG00000017057	Il13ra1	chrX:36112109-36112110	mouse	B2_Mm2_chrX:37085811-37085973	973702
ENSMUSG00000017132	Cyth1	chr11:118248591-118248592	human	B2_Mm2_chr11:117980216-117980406	268186
ENSMUSG00000017144	Rnd3	chr2:51149110-51149111	mouse	B2_Mm2_chr2:52772483-52772668	1623373
ENSMUSG00000017221	Psmd3	chr11:98682553-98682554	mouse	B2_Mm2_chr11:98958552-98958582	275999
ENSMUSG00000017288	Vps53	chr11:76179646-76179647	mouse	B2_Mm2_chr11:75669417-75669600	510047
ENSMUSG00000017412	Cacnb4	chr2:52676830-52676831	mouse	B2_Mm2_chr2:52772483-52772668	95653
ENSMUSG00000017418	Arl5b	chr2:15049394-15049395	shared	B2_Mm2_chr2:13542431-13542614	1506781
ENSMUSG00000017615	Tnfaip1	chr11:78536331-78536332	mouse	B2_Mm2_chr11:78586239-78586365	49908
ENSMUSG00000017652	Cd40	chr2:165055626-165055627	shared	B2_Mm2_chr2:164912495-164912612	143015
ENSMUSG00000017670	Elmo2	chr2:165326478-165326479	mouse	B2_Mm2_chr2:164912495-164912612	413867
ENSMUSG00000017677	Wsb1	chr11:79254670-79254671	human	B2_Mm2_chr11:78884805-78884988	369683
ENSMUSG00000017697	Ada	chr2:163750238-163750239	mouse	B2_Mm2_chr2:164353103-164353292	602865
ENSMUSG00000017715	Pgs1	chr11:117986291-117986292	mouse	B2_Mm2_chr11:117980216-117980406	5886
ENSMUSG00000017756	Slc12a7	chr13:73733093-73733094	mouse	B2_Mm2_chr13:73778340-73778503	45247
ENSMUSG00000017776	Crk	chr11:75679258-75679259	mouse	B2_Mm2_chr11:75669417-75669600	9659
ENSMUSG00000017830	Dhx58	chr11:100704270-100704271	shared	B2_Mm2_chr11:100702548-100702730	1541
ENSMUSG00000017832	Hspb9	chr11:100713849-100713850	mouse	B2_Mm2_chr11:100702548-100702730	11120
ENSMUSG00000017929	B4galt5	chr2:167349182-167349183	shared	B2_Mm2_chr2:167344976-167345161	4022
ENSMUSG00000018040	Rrp7a	chr15:83122800-83122801	mouse	B2_Mm2_chr15:83209208-83209379	86408
ENSMUSG00000018076	Med13l	chr5:118560678-118560679	shared	B2_Mm2_chr5:120204469-120204625	1643791
ENSMUSG00000018143	Mafk	chr5:139791512-139791513	mouse	B2_Mm2_chr5:139780784-139780976	10537
ENSMUSG00000018160	Med1	chr11:98193292-98193293	mouse	B2_Mm2_chr11:97972958-97972971	220322
ENSMUSG00000018167	Stard3	chr11:98358367-98358368	mouse	B2_Mm2_chr11:97972958-97972971	385397
ENSMUSG00000018171	Vmp1	chr11:86683835-86683836	shared	B2_Mm2_chr11:86518152-86518349	165487
ENSMUSG00000018199	Trove2	chr1:143777067-143777068	mouse	B2_Mm2_chr1:143764554-143764745	12323
ENSMUSG00000018293	Pfn1	chr11:70654643-70654644	mouse	B2_Mm2_chr11:70720389-70720494	65746
ENSMUSG00000018334	Ksr1	chr11:79146406-79146407	human	B2_Mm2_chr11:78884805-78884988	261419
ENSMUSG00000018340	Anxa6	chr11:55033444-55033445	human	B2_Mm2_chr11:55013204-55013381	20064
ENSMUSG00000018341	Il12rb2	chr6:67376187-67376188	mouse	B2_Mm2_chr6:70810096-70810281	3433909
ENSMUSG00000018476	Kdm6b	chr11:69413674-69413675	mouse	B2_Mm2_chr11:69534661-69534840	120987
ENSMUSG00000018559	Ctdnep1	chr11:69981155-69981156	mouse	B2_Mm2_chr11:69926838-69927010	54146
ENSMUSG00000018565	Elp5	chr11:69982516-69982517	mouse	B2_Mm2_chr11:69926838-69927010	55507
ENSMUSG00000018567	Gabarap	chr11:69991142-69991143	human	B2_Mm2_chr11:69926838-69927010	64133
ENSMUSG00000018583	G3bp1	chr11:55469684-55469685	mouse	B2_Mm2_chr11:55013204-55013381	456304
ENSMUSG00000018585	Atox1	chr11:55461238-55461239	human	B2_Mm2_chr11:55013204-55013381	447858
ENSMUSG00000018654	Ikzf1	chr11:11685002-11685003	mouse	B2_Mm2_chr11:6549090-6549264	5135739
ENSMUSG00000018659	Pnpo	chr11:96943985-96943986	mouse	B2_Mm2_chr11:96966694-96966884	22709
ENSMUSG00000018678	Sp2	chr11:96982958-96982959	mouse	B2_Mm2_chr11:96966694-96966884	16075
ENSMUSG00000018707	Dync1h1	chr12:110601451-110601452	mouse	B2_Mm2_chr12:111127790-111127974	526339
ENSMUSG00000018752	Tnfsfm13	chr11:69696097-69696098	human	B2_Mm2_chr11:69698407-69698465	2310
ENSMUSG00000018770	Atp5g3	chr2:73911325-73911326	mouse	B2_Mm2_chr2:73886133-73886370	24956
ENSMUSG00000018796	Acsl1	chr8:46471036-46471037	shared	B2_Mm2_chr8:45978614-45978781	492256
ENSMUSG00000018848	Rars	chr11:35834505-35834506	mouse	B2_Mm2_chr11:34738344-34738524	1095982
ENSMUSG00000018899	Irf1	chr11:53770013-53770014	shared	B2_Mm2_chr11:53532466-53532654	237360
ENSMUSG00000018923	Med11	chr11:70451918-70451919	mouse	B2_Mm2_chr11:70457279-70457466	5361
ENSMUSG00000018925	Heatr9	chr11:83522174-83522175	mouse	B2_Mm2_chr11:83635012-83635177	112838
ENSMUSG00000018930	Ccl4	chr11:83662583-83662584	mouse	B2_Mm2_chr11:83663111-83663292	528
ENSMUSG00000018974	Sart3	chr5:113772509-113772510	human	B2_Mm2_chr5:113834053-113834220	61544
ENSMUSG00000018983	E2f2	chr4:136172393-136172394	human	B2_Mm2_chr4:136189311-136189463	16918
ENSMUSG00000019054	Fis1	chr5:136953274-136953275	mouse	B2_Mm2_chr5:137306113-137306265	352839
ENSMUSG00000019082	Slc25a22	chr7:141437891-141437892	shared	B2_Mm2_chr7:141372593-141372788	65104
ENSMUSG00000019124	Scrn1	chr6:54566488-54566489	human	B2_Mm2_chr6:55192044-55192232	625556
ENSMUSG00000019173	Rab5c	chr11:100738214-100738215	mouse	B2_Mm2_chr11:100702548-100702730	35485
ENSMUSG00000019188	H13	chr2:152669460-152669461	mouse	B2_Mm2_chr2:152801030-152801210	131570
ENSMUSG00000019189	Rnf145	chr11:44518963-44518964	mouse	B2_Mm2_chr11:45753141-45753308	1234178
ENSMUSG00000019210	Atp6v1e1	chr6:120822792-120822793	shared	B2_Mm2_chr6:120789040-120789226	33567
ENSMUSG00000019254	Ppp1r12c	chr7:4501679-4501680	mouse	B2_Mm2_chr7:4409860-4409955	91725
ENSMUSG00000019461	Plscr3	chr11:69846375-69846376	mouse	B2_Mm2_chr11:69926838-69927010	80463
ENSMUSG00000019471	Cdc37	chr9:21149981-21149982	mouse	B2_Mm2_chr9:21095644-21095831	54151
ENSMUSG00000019487	Trip10	chr17:57249454-57249455	mouse	B2_Mm2_chr17:56301758-56301943	947512
ENSMUSG00000019699	Akt3	chr1:177258202-177258203	mouse	B2_Mm2_chr1:178242181-178242353	983979
ENSMUSG00000019738	Polr2i	chr7:30231947-30231948	mouse	B2_Mm2_chr7:30238472-30238521	6525
ENSMUSG00000019768	Esr1	chr10:4611592-4611593	mouse	B2_Mm2_chr10:4337464-4337646	273947
ENSMUSG00000019782	Rwdd1	chr10:34019623-34019624	mouse	B2_Mm2_chr10:39777047-39777240	5757424
ENSMUSG00000019790	Stxbp5	chr10:9901078-9901079	mouse	B2_Mm2_chr10:10665440-10665624	764362
ENSMUSG00000019791	Hint3	chr10:30629631-30629632	human	B2_Mm2_chr10:26833296-26833479	3796153
ENSMUSG00000019794	Katna1	chr10:7725999-7726000	mouse	B2_Mm2_chr10:7069190-7069318	656682
ENSMUSG00000019795	Pcmt1	chr10:7681135-7681136	human	B2_Mm2_chr10:7069190-7069318	611818
ENSMUSG00000019802	Sec63	chr10:42761495-42761496	mouse	B2_Mm2_chr10:42298031-42298239	463257
ENSMUSG00000019806	Aig1	chr10:13868979-13868980	mouse	B2_Mm2_chr10:12954810-12955006	913974
ENSMUSG00000019818	Cd164	chr10:41519413-41519414	mouse	B2_Mm2_chr10:41505717-41505845	13569
ENSMUSG00000019823	Mical1	chr10:41476313-41476314	human	B2_Mm2_chr10:41505717-41505845	29404
ENSMUSG00000019842	Traf3ip2	chr10:39612933-39612934	mouse	B2_Mm2_chr10:39777047-39777240	164114
ENSMUSG00000019843	Fyn	chr10:39368854-39368855	mouse	B2_Mm2_chr10:39777047-39777240	408193
ENSMUSG00000019850	Tnfaip3	chr10:19015656-19015657	shared	B2_Mm2_chr10:19244010-19244174	228354
ENSMUSG00000019853	Hebp2	chr10:18546075-18546076	human	B2_Mm2_chr10:18233816-18233946	312130
ENSMUSG00000019863	Qrsl1	chr10:43901744-43901745	human	B2_Mm2_chr10:43675582-43675766	225979
ENSMUSG00000019864	Rtn4ip1	chr10:43901806-43901807	mouse	B2_Mm2_chr10:43675582-43675766	226041
ENSMUSG00000019866	Aim1	chr10:44148852-44148853	shared	B2_Mm2_chr10:43675582-43675766	473087
ENSMUSG00000019868	Vta1	chr10:14705559-14705560	mouse	B2_Mm2_chr10:12954810-12955006	1750554
ENSMUSG00000019876	Pkib	chr10:57631980-57631981	mouse	B2_Mm2_chr10:58495757-58495934	863777
ENSMUSG00000019877	Serinc1	chr10:57532529-57532530	mouse	B2_Mm2_chr10:58495757-58495934	963228
ENSMUSG00000019916	P4ha1	chr10:59323295-59323296	mouse	B2_Mm2_chr10:59340109-59340300	16814
ENSMUSG00000019927	Ube2d1	chr10:71285261-71285262	shared	B2_Mm2_chr10:71346834-71347030	61573
ENSMUSG00000019947	Arid5b	chr10:68278739-68278740	mouse	B2_Mm2_chr10:68062955-68063105	215635
ENSMUSG00000019966	Kitl	chr10:100015629-100015630	mouse	B2_Mm2_chr10:101104192-101104378	1088563
ENSMUSG00000019970	Sgk1	chr10:21882183-21882184	human	B2_Mm2_chr10:20314936-20315095	1567089
ENSMUSG00000019979	Apaf1	chr10:91082769-91082770	mouse	B2_Mm2_chr10:91079712-91079840	2930
ENSMUSG00000019990	Pde7b	chr10:20725077-20725078	mouse	B2_Mm2_chr10:20314936-20315095	409983
ENSMUSG00000019998	Stx7	chr10:24149301-24149302	shared	B2_Mm2_chr10:26833296-26833479	2683995
ENSMUSG00000020020	Usp44	chr10:93831554-93831555	mouse	B2_Mm2_chr10:93572377-93572556	258999
ENSMUSG00000020021	Fgd6	chr10:94036000-94036001	human	B2_Mm2_chr10:93572377-93572556	463445
ENSMUSG00000020038	Cry1	chr10:85185063-85185064	shared	B2_Mm2_chr10:84972674-84972847	212217
ENSMUSG00000020042	Btbd11	chr10:85386813-85386814	human	B2_Mm2_chr10:84972674-84972847	413967
ENSMUSG00000020057	Dram1	chr10:88379079-88379080	shared	B2_Mm2_chr10:88306361-88306533	72547
ENSMUSG00000020063	Sirt1	chr10:63381703-63381704	mouse	B2_Mm2_chr10:63008277-63008460	373244
ENSMUSG00000020075	Ddx21	chr10:62602280-62602281	human	B2_Mm2_chr10:62503253-62503443	98838
ENSMUSG00000020077	Srgn	chr10:62527450-62527451	mouse	B2_Mm2_chr10:62503253-62503443	24008
ENSMUSG00000020085	Aifm2	chr10:61715262-61715263	human	B2_Mm2_chr10:61681853-61682036	33227
ENSMUSG00000020088	Sar1a	chr10:61680298-61680299	mouse	B2_Mm2_chr10:61681853-61682036	1555
ENSMUSG00000020089	Ppa1	chr10:61648551-61648552	shared	B2_Mm2_chr10:61623895-61624030	24522
ENSMUSG00000020107	Anapc16	chr10:60003134-60003135	mouse	B2_Mm2_chr10:60033627-60033799	30493
ENSMUSG00000020111	Micu1	chr10:59702476-59702477	human	B2_Mm2_chr10:60033627-60033799	331151
ENSMUSG00000020114	Cand1	chr10:119240054-119240055	mouse	B2_Mm2_chr10:120111725-120111904	871671
ENSMUSG00000020115	Tbk1	chr10:121586786-121586787	mouse	B2_Mm2_chr10:121689342-121689520	102556
ENSMUSG00000020116	Pno1	chr11:17211567-17211568	human	B2_Mm2_chr11:19985713-19985900	2774146
ENSMUSG00000020120	Plek	chr11:17052380-17052381	shared	B2_Mm2_chr11:19985713-19985900	2933333
ENSMUSG00000020122	Egfr	chr11:16752202-16752203	mouse	B2_Mm2_chr11:19985713-19985900	3233511
ENSMUSG00000020124	Usp15	chr10:123196994-123196995	shared	B2_Mm2_chr10:123121092-123121278	75717
ENSMUSG00000020128	Vps54	chr11:21239280-21239281	mouse	B2_Mm2_chr11:20668383-20668575	570706
ENSMUSG00000020132	Rab21	chr10:115315593-115315594	mouse	B2_Mm2_chr10:115318447-115318624	2854
ENSMUSG00000020133	RP23-341K9.1	chr10:80320536-80320537	mouse	B2_Mm2_chr10:80653570-80653719	333034
ENSMUSG00000020134	Peli1	chr11:21091290-21091291	mouse	B2_Mm2_chr11:20668383-20668575	422716
ENSMUSG00000020142	Slc1a4	chr11:20332712-20332713	human	B2_Mm2_chr11:20275167-20275352	57361
ENSMUSG00000020149	Rab1a	chr11:20201431-20201432	shared	B2_Mm2_chr11:20209256-20209435	7825
ENSMUSG00000020155	Kcnmb1	chr11:33963012-33963013	human	B2_Mm2_chr11:34030935-34030963	67923
ENSMUSG00000020177	RP24-208F10.1	chr10:117238702-117238703	human	B2_Mm2_chr10:117363199-117363389	124497
ENSMUSG00000020178	Adora2a	chr10:75316876-75316877	shared	B2_Mm2_chr10:75443159-75443333	126283
ENSMUSG00000020184	Mdm2	chr10:117710757-117710758	shared	B2_Mm2_chr10:117715774-117715953	5017
ENSMUSG00000020205	Phlda1	chr10:111506285-111506286	mouse	B2_Mm2_chr10:115160317-115160480	3654032
ENSMUSG00000020211	Sf3a2	chr10:80798197-80798198	mouse	B2_Mm2_chr10:80822074-80822233	23877
ENSMUSG00000020225	Tmbim4	chr10:120201589-120201590	mouse	B2_Mm2_chr10:120111725-120111904	89686
ENSMUSG00000020227	Irak3	chr10:120202129-120202130	human	B2_Mm2_chr10:120111725-120111904	90226
ENSMUSG00000020228	Helb	chr10:120112986-120112987	human	B2_Mm2_chr10:120111725-120111904	1083
ENSMUSG00000020238	Ncln	chr10:81496391-81496392	mouse	B2_Mm2_chr10:81445547-81445729	50663
ENSMUSG00000020246	Hcfc2	chr10:82696159-82696160	mouse	B2_Mm2_chr10:81445547-81445729	1250431
ENSMUSG00000020248	Nfyb	chr10:82764143-82764144	mouse	B2_Mm2_chr10:81445547-81445729	1318415
ENSMUSG00000020256	Aldh1l2	chr10:83534139-83534140	human	B2_Mm2_chr10:84972674-84972847	1438535
ENSMUSG00000020267	Hint1	chr11:54866382-54866383	mouse	B2_Mm2_chr11:55013204-55013381	146822
ENSMUSG00000020271	Fbxw11	chr11:32642723-32642724	mouse	B2_Mm2_chr11:32605777-32605957	36767
ENSMUSG00000020275	Rel	chr11:23770969-23770970	mouse	B2_Mm2_chr11:23865241-23865425	94272
ENSMUSG00000020277	Pfkl	chr10:78010082-78010083	mouse	B2_Mm2_chr10:78017635-78017824	7553
ENSMUSG00000020300	Cpeb4	chr11:31872210-31872211	mouse	B2_Mm2_chr11:31669596-31669759	202452
ENSMUSG00000020307	Cdc34	chr10:79682194-79682195	mouse	B2_Mm2_chr10:79747746-79747910	65552
ENSMUSG00000020326	Ccng1	chr11:40755310-40755311	mouse	B2_Mm2_chr11:45753141-45753308	4997831
ENSMUSG00000020332	Meikin	chr11:54370651-54370652	mouse	B2_Mm2_chr11:54618180-54618363	247529
ENSMUSG00000020334	Slc22a4	chr11:54028089-54028090	human	B2_Mm2_chr11:53532466-53532654	495436
ENSMUSG00000020346	Mgat1	chr11:49244190-49244191	shared	B2_Mm2_chr11:49105589-49105743	138448
ENSMUSG00000020357	Flt4	chr11:49609262-49609263	mouse	B2_Mm2_chr11:49720162-49720200	110900
ENSMUSG00000020366	Mapk9	chr11:49846750-49846751	mouse	B2_Mm2_chr11:49720162-49720200	126551
ENSMUSG00000020386	Sar1b	chr11:51763686-51763687	mouse	B2_Mm2_chr11:51713241-51713428	50259
ENSMUSG00000020387	Jade2	chr11:51857652-51857653	human	B2_Mm2_chr11:51713241-51713428	144225
ENSMUSG00000020393	Kremen1	chr11:5261557-5261558	human	B2_Mm2_chr11:5374324-5374469	112767
ENSMUSG00000020397	Med7	chr11:46436924-46436925	mouse	B2_Mm2_chr11:45753141-45753308	683617
ENSMUSG00000020407	Upp1	chr11:9118102-9118103	shared	B2_Mm2_chr11:6549090-6549264	2568839
ENSMUSG00000020413	Hus1	chr11:9011190-9011191	mouse	B2_Mm2_chr11:6549090-6549264	2461927
ENSMUSG00000020415	Pttg1	chr11:43426250-43426251	mouse	B2_Mm2_chr11:45753141-45753308	2326891
ENSMUSG00000020422	Tns3	chr11:8664534-8664535	human	B2_Mm2_chr11:6549090-6549264	2115271
ENSMUSG00000020423	Btg2	chr1:134079119-134079120	mouse	B2_Mm2_chr1:134154761-134154945	75642
ENSMUSG00000020432	Tcn2	chr11:3932158-3932159	human	B2_Mm2_chr11:3442442-3442625	489534
ENSMUSG00000020440	Arf5	chr6:28423559-28423560	mouse	B2_Mm2_chr6:28837349-28837527	413790
ENSMUSG00000020444	Guk1	chr11:59192211-59192212	shared	B2_Mm2_chr11:59151573-59151730	40482
ENSMUSG00000020448	Rnf185	chr11:3452362-3452363	human	B2_Mm2_chr11:3442442-3442625	9738
ENSMUSG00000020451	Limk2	chr11:3409188-3409189	human	B2_Mm2_chr11:3442442-3442625	33254
ENSMUSG00000020455	Trim11	chr11:58978092-58978093	mouse	B2_Mm2_chr11:59151573-59151730	173481
ENSMUSG00000020456	Ogdh	chr11:6291632-6291633	mouse	B2_Mm2_chr11:6524331-6524502	232699
ENSMUSG00000020464	Pnpt1	chr11:29130743-29130744	mouse	B2_Mm2_chr11:29709621-29709818	578878
ENSMUSG00000020475	Pgam2	chr11:5803732-5803733	mouse	B2_Mm2_chr11:5560401-5560596	243137
ENSMUSG00000020476	Dbnl	chr11:5788487-5788488	mouse	B2_Mm2_chr11:5560401-5560596	227892
ENSMUSG00000020483	Dynll2	chr11:87987532-87987533	mouse	B2_Mm2_chr11:87967284-87967469	20064
ENSMUSG00000020496	Rnf187	chr11:58938915-58938916	mouse	B2_Mm2_chr11:59151573-59151730	212658
ENSMUSG00000020516	Rps6kb1	chr11:86544804-86544805	mouse	B2_Mm2_chr11:86518152-86518349	26456
ENSMUSG00000020536	Llgl1	chr11:60699722-60699723	mouse	B2_Mm2_chr11:60772304-60772481	72582
ENSMUSG00000020547	Bzw2	chr12:36158079-36158080	mouse	B2_Mm2_chr12:36037000-36037062	121018
ENSMUSG00000020564	Atxn7l1	chr12:33147692-33147693	mouse	B2_Mm2_chr12:34666039-34666221	1518347
ENSMUSG00000020572	Mampt	chr12:32819544-32819545	shared	B2_Mm2_chr12:31507112-31507297	1312248
ENSMUSG00000020577	Tspan13	chr12:36042499-36042500	mouse	B2_Mm2_chr12:36037000-36037062	5438
ENSMUSG00000020593	Lpin1	chr12:16610965-16610966	human	B2_Mm2_chr12:16908041-16908207	297076
ENSMUSG00000020598	Nrcam	chr12:44328884-44328885	mouse	B2_Mm2_chr12:51822358-51822546	7493474
ENSMUSG00000020599	Rgs9	chr11:109298128-109298129	shared	B2_Mm2_chr11:109214944-109215127	83002
ENSMUSG00000020601	Trib2	chr12:15816921-15816922	human	B2_Mm2_chr12:16908041-16908207	1091120
ENSMUSG00000020610	Amz2	chr11:109425945-109425946	human	B2_Mm2_chr11:109482743-109482936	56798
ENSMUSG00000020611	Gna13	chr11:109362830-109362831	shared	B2_Mm2_chr11:109482743-109482936	119913
ENSMUSG00000020614	Fam20a	chr11:109722278-109722279	human	B2_Mm2_chr11:109955285-109955480	233007
ENSMUSG00000020621	Rdh14	chr12:10390771-10390772	human	B2_Mm2_chr12:11286551-11286713	895780
ENSMUSG00000020630	Rnaseh1	chr12:28649601-28649602	mouse	B2_Mm2_chr12:31507112-31507297	2857511
ENSMUSG00000020638	Cmpk2	chr12:26469203-26469204	shared	B2_Mm2_chr12:24701724-24701887	1767317
ENSMUSG00000020641	Rsad2	chr12:26456451-26456452	shared	B2_Mm2_chr12:24701724-24701887	1754565
ENSMUSG00000020656	Grhl1	chr12:24572282-24572283	mouse	B2_Mm2_chr12:24678026-24678207	105744
ENSMUSG00000020658	Efr3b	chr12:4038914-4038915	mouse	B2_Mm2_chr12:3875589-3875785	163130
ENSMUSG00000020676	Ccl11	chr11:82057822-82057823	mouse	B2_Mm2_chr11:81614542-81614720	443103
ENSMUSG00000020694	Tlk2	chr11:105178806-105178807	mouse	B2_Mm2_chr11:105369254-105369381	190448
ENSMUSG00000020695	Mrc2	chr11:105292642-105292643	human	B2_Mm2_chr11:105369254-105369381	76612
ENSMUSG00000020700	Map3k3	chr11:106084612-106084613	mouse	B2_Mm2_chr11:106497958-106498127	413346
ENSMUSG00000020707	Rnf135	chr11:80183850-80183851	mouse	B2_Mm2_chr11:80160777-80160962	22889
ENSMUSG00000020715	Ern1	chr11:106487851-106487852	human	B2_Mm2_chr11:106497958-106498127	10107
ENSMUSG00000020717	Pecam1	chr11:106750627-106750628	mouse	B2_Mm2_chr11:106750893-106751002	266
ENSMUSG00000020732	Rab37	chr11:115091430-115091431	mouse	B2_Mm2_chr11:115080395-115080583	10848
ENSMUSG00000020737	Hn1	chr11:115514386-115514387	mouse	B2_Mm2_chr11:115562403-115562578	48017
ENSMUSG00000020741	Cluh	chr11:74649494-74649495	human	B2_Mm2_chr11:74607120-74607246	42249
ENSMUSG00000020780	Srp68	chr11:116274216-116274217	mouse	B2_Mm2_chr11:116376451-116376630	102235
ENSMUSG00000020804	Aanat	chr11:116586431-116586432	human	B2_Mm2_chr11:116488785-116488974	97458
ENSMUSG00000020806	Rhbdf2	chr11:116627018-116627019	shared	B2_Mm2_chr11:116488785-116488974	138045
ENSMUSG00000020812	RP23-313J14.6	chr11:116671659-116671660	mouse	B2_Mm2_chr11:116488785-116488974	182686
ENSMUSG00000020826	Nos2	chr11:78920786-78920787	mouse	B2_Mm2_chr11:78884805-78884988	35799
ENSMUSG00000020831	RP23-198E14.7	chr11:70237913-70237914	mouse	B2_Mm2_chr11:70313942-70314125	76029
ENSMUSG00000020834	Dhrs13	chr11:78032279-78032280	mouse	B2_Mm2_chr11:78040971-78041151	8692
ENSMUSG00000020840	Blmh	chr11:76924808-76924809	mouse	B2_Mm2_chr11:76973718-76973909	48910
ENSMUSG00000020843	Timm22	chr11:76406951-76406952	mouse	B2_Mm2_chr11:76973718-76973909	566767
ENSMUSG00000020844	Nxn	chr11:76399139-76399140	mouse	B2_Mm2_chr11:76973718-76973909	574579
ENSMUSG00000020849	Ywhae	chr11:75732868-75732869	mouse	B2_Mm2_chr11:75669417-75669600	63269
ENSMUSG00000020863	Luc7l3	chr11:94321987-94321988	mouse	B2_Mm2_chr11:94607623-94607800	285636
ENSMUSG00000020864	Ankrd40	chr11:94328000-94328001	mouse	B2_Mm2_chr11:94607623-94607800	279623
ENSMUSG00000020869	Lrrc59	chr11:94629766-94629767	mouse	B2_Mm2_chr11:94607623-94607800	21967
ENSMUSG00000020873	Slc35b1	chr11:95384691-95384692	mouse	B2_Mm2_chr11:95478927-95479113	94236
ENSMUSG00000020884	Asgr1	chr11:70054084-70054085	human	B2_Mm2_chr11:69926838-69927010	127075
ENSMUSG00000020900	Myh10	chr11:68691558-68691559	mouse	B2_Mm2_chr11:68839011-68839188	147453
ENSMUSG00000020919	Stat5b	chr11:100850723-100850724	mouse	B2_Mm2_chr11:100702548-100702730	147994
ENSMUSG00000020922	Lsm12	chr11:102185295-102185296	mouse	B2_Mm2_chr11:102158155-102158345	26951
ENSMUSG00000020946	Gosr2	chr11:103697897-103697898	mouse	B2_Mm2_chr11:103975551-103975737	277654
ENSMUSG00000020952	Scfd1	chr12:51377509-51377510	mouse	B2_Mm2_chr12:51822358-51822546	444849
ENSMUSG00000020956	Dtd2	chr12:52006500-52006501	human	B2_Mm2_chr12:51822358-51822546	183955
ENSMUSG00000021024	Psma6	chr12:55384221-55384222	human	B2_Mm2_chr12:55313569-55313740	70482
ENSMUSG00000021025	Nfkbia	chr12:55492646-55492647	shared	B2_Mm2_chr12:55313569-55313740	178907
ENSMUSG00000021036	Sptlc2	chr12:87388354-87388355	mouse	B2_Mm2_chr12:87403298-87403447	14944
ENSMUSG00000021039	Snw1	chr12:87472273-87472274	mouse	B2_Mm2_chr12:87416827-87416961	55313
ENSMUSG00000021048	Mthfd1	chr12:76255297-76255298	human	B2_Mm2_chr12:76194729-76194852	60446
ENSMUSG00000021054	Sgpp1	chr12:75735728-75735729	human	B2_Mm2_chr12:75812153-75812338	76425
ENSMUSG00000021061	Sptb	chr12:76710546-76710547	human	B2_Mm2_chr12:76515619-76515810	194737
ENSMUSG00000021066	Atl1	chr12:69892613-69892614	mouse	B2_Mm2_chr12:69750350-69750537	142077
ENSMUSG00000021067	Sav1	chr12:69987001-69987002	mouse	B2_Mm2_chr12:70216894-70217078	229893
ENSMUSG00000021091	Serpina3n	chr12:104406728-104406729	mouse	B2_Mm2_chr12:104742467-104742646	335739
ENSMUSG00000021109	Hif1a	chr12:73901374-73901375	mouse	B2_Mm2_chr12:75629727-75629906	1728353
ENSMUSG00000021114	Atp6v1d	chr12:78861637-78861638	mouse	B2_Mm2_chr12:78537680-78537857	323781
ENSMUSG00000021116	Eif2s1	chr12:78861818-78861819	human	B2_Mm2_chr12:78537680-78537857	323962
ENSMUSG00000021118	Plek2	chr12:78906963-78906964	mouse	B2_Mm2_chr12:78537680-78537857	369107
ENSMUSG00000021125	Arg2	chr12:79130776-79130777	mouse	B2_Mm2_chr12:78537680-78537857	592920
ENSMUSG00000021133	Susd6	chr12:80790509-80790510	shared	B2_Mm2_chr12:80894233-80894397	103724
ENSMUSG00000021140	Pcnx	chr12:81860022-81860023	shared	B2_Mm2_chr12:80894233-80894397	965626
ENSMUSG00000021143	Pacs2	chr12:113014507-113014508	mouse	B2_Mm2_chr12:112994558-112994732	19776
ENSMUSG00000021147	Wdr37	chr13:8871908-8871909	mouse	B2_Mm2_chr13:6617377-6617573	2254336
ENSMUSG00000021182	Ccdc88c	chr12:101029055-101029056	human	B2_Mm2_chr12:100752414-100752583	276473
ENSMUSG00000021196	Pfkp	chr13:6648776-6648777	shared	B2_Mm2_chr13:6617377-6617573	31204
ENSMUSG00000021200	Asb2	chr12:103356000-103356001	human	B2_Mm2_chr12:102454483-102454672	901329
ENSMUSG00000021263	Degs2	chr12:108702314-108702315	mouse	B2_Mm2_chr12:111127790-111127974	2425476
ENSMUSG00000021266	Wars	chr12:108894173-108894174	shared	B2_Mm2_chr12:111127790-111127974	2233617
ENSMUSG00000021270	Hsp90aa1	chr12:110702727-110702728	human	B2_Mm2_chr12:111127790-111127974	425063
ENSMUSG00000021277	Traf3	chr12:111166369-111166370	shared	B2_Mm2_chr12:111127790-111127974	38396
ENSMUSG00000021280	Exoc3l4	chr12:111417016-111417017	shared	B2_Mm2_chr12:111561538-111561724	144522
ENSMUSG00000021281	Tnfaip2	chr12:111442468-111442469	shared	B2_Mm2_chr12:111561538-111561724	119070
ENSMUSG00000021298	Gpr132	chr12:112868227-112868228	mouse	B2_Mm2_chr12:112991021-112991212	122794
ENSMUSG00000021322	Aoah	chr13:20794112-20794113	human	B2_Mm2_chr13:24776694-24776882	3982582
ENSMUSG00000021338	Lrrc16a	chr13:24280794-24280795	mouse	B2_Mm2_chr13:24776694-24776882	495900
ENSMUSG00000021357	Exoc2	chr13:30974092-30974093	human	B2_Mm2_chr13:30762400-30762579	211514
ENSMUSG00000021360	Gcnt2	chr13:40859753-40859754	mouse	B2_Mm2_chr13:40891612-40891756	31859
ENSMUSG00000021366	Hivep1	chr13:42052020-42052021	mouse	B2_Mm2_chr13:41127707-41127897	924124
ENSMUSG00000021367	Edn1	chr13:42301475-42301476	shared	B2_Mm2_chr13:43318732-43318910	1017257
ENSMUSG00000021371	Mcur1	chr13:43560190-43560191	mouse	B2_Mm2_chr13:43318732-43318910	241281
ENSMUSG00000021374	Nup153	chr13:46727939-46727940	mouse	B2_Mm2_chr13:46786044-46786152	58105
ENSMUSG00000021376	Tpmt	chr13:47044736-47044737	human	B2_Mm2_chr13:47081043-47081222	36307
ENSMUSG00000021377	Dek	chr13:47106200-47106201	mouse	B2_Mm2_chr13:47081043-47081222	24979
ENSMUSG00000021408	Ripk1	chr13:34002362-34002363	mouse	B2_Mm2_chr13:35399647-35399687	1397285
ENSMUSG00000021411	Pxdc1	chr13:34653485-34653486	human	B2_Mm2_chr13:35399647-35399687	746162
ENSMUSG00000021423	Ly86	chr13:37345207-37345208	mouse	B2_Mm2_chr13:37522987-37523127	177780
ENSMUSG00000021451	Sema4d	chr13:51793746-51793747	human	B2_Mm2_chr13:49221020-49221178	2572569
ENSMUSG00000021453	Gadd45g	chr13:51846677-51846678	shared	B2_Mm2_chr13:49221020-49221178	2625500
ENSMUSG00000021460	Auh	chr13:52929680-52929681	mouse	B2_Mm2_chr13:54558483-54558669	1628803
ENSMUSG00000021482	Aaed1	chr13:64312709-64312710	human	B2_Mm2_chr13:64319855-64320011	7146
ENSMUSG00000021485	Mxd3	chr13:55329822-55329823	human	B2_Mm2_chr13:55178019-55178196	151627
ENSMUSG00000021486	Prelid1	chr13:55320499-55320500	human	B2_Mm2_chr13:55178019-55178196	142304
ENSMUSG00000021565	Slc6a19	chr13:73704864-73704865	mouse	B2_Mm2_chr13:73778340-73778503	73476
ENSMUSG00000021583	Erap1	chr13:74639567-74639568	mouse	B2_Mm2_chr13:73778340-73778503	861065
ENSMUSG00000021589	Rhobtb3	chr13:75943924-75943925	human	B2_Mm2_chr13:73778340-73778503	2165422
ENSMUSG00000021590	Spata9	chr13:75967149-75967150	human	B2_Mm2_chr13:73778340-73778503	2188647
ENSMUSG00000021591	Glrx	chr13:75839867-75839868	human	B2_Mm2_chr13:73778340-73778503	2061365
ENSMUSG00000021594	Srd5a1	chr13:69611441-69611442	human	B2_Mm2_chr13:69509735-69509881	101561
ENSMUSG00000021596	Mctp1	chr13:76384534-76384535	human	B2_Mm2_chr13:73778340-73778503	2606032
ENSMUSG00000021598	Med10	chr13:69802394-69802395	mouse	B2_Mm2_chr13:69509735-69509881	292514
ENSMUSG00000021610	Clptm1l	chr13:73604005-73604006	mouse	B2_Mm2_chr13:73451466-73451637	152369
ENSMUSG00000021614	Vcan	chr13:89742508-89742509	mouse	B2_Mm2_chr13:90926943-90927084	1184435
ENSMUSG00000021615	Xrcc4	chr13:90089607-90089608	mouse	B2_Mm2_chr13:90926943-90927084	837336
ENSMUSG00000021619	Atg10	chr13:91223967-91223968	mouse	B2_Mm2_chr13:90927087-90927265	296703
ENSMUSG00000021621	Zcchc9	chr13:91807704-91807705	mouse	B2_Mm2_chr13:92221703-92221860	413999
ENSMUSG00000021624	Cd180	chr13:102693557-102693558	mouse	B2_Mm2_chr13:102682360-102682566	10992
ENSMUSG00000021638	Ocln	chr13:100552717-100552718	mouse	B2_Mm2_chr13:100499311-100499492	53226
ENSMUSG00000021650	Ptcd2	chr13:99344704-99344705	mouse	B2_Mm2_chr13:99288583-99288772	55933
ENSMUSG00000021669	Col4a3bp	chr13:96542617-96542618	human	B2_Mm2_chr13:97066074-97066262	523457
ENSMUSG00000021676	Iqgap2	chr13:95891921-95891922	human	B2_Mm2_chr13:95070361-95070540	821382
ENSMUSG00000021678	F2rl1	chr13:95525226-95525227	mouse	B2_Mm2_chr13:95070361-95070540	454687
ENSMUSG00000021681	Aggf1	chr13:95375351-95375352	mouse	B2_Mm2_chr13:95070361-95070540	304812
ENSMUSG00000021696	Elovl7	chr13:108214403-108214404	human	B2_Mm2_chr13:104306276-104306431	3907973
ENSMUSG00000021710	Nln	chr13:104109613-104109614	human	B2_Mm2_chr13:104306276-104306431	196663
ENSMUSG00000021725	Parp8	chr13:117025536-117025537	mouse	B2_Mm2_chr13:117223074-117223264	197538
ENSMUSG00000021728	Emb	chr13:117208535-117208536	mouse	B2_Mm2_chr13:117223074-117223264	14539
ENSMUSG00000021733	Slc4a7	chr14:14702278-14702279	mouse	B2_Mm2_chr14:14607112-14607280	94999
ENSMUSG00000021737	Psmd6	chr14:14120983-14120984	mouse	B2_Mm2_chr14:14607112-14607280	486129
ENSMUSG00000021738	Atxn7	chr14:13961439-13961440	shared	B2_Mm2_chr14:14607112-14607280	645673
ENSMUSG00000021751	Acox2	chr14:8259352-8259353	human	B2_Mm2_chr14:8096231-8096388	162965
ENSMUSG00000021756	Il6st	chr13:112464069-112464070	human	B2_Mm2_chr13:113271666-113271683	807597
ENSMUSG00000021758	Ddx4	chr13:112652474-112652475	mouse	B2_Mm2_chr13:113271666-113271683	619192
ENSMUSG00000021759	Plpp1	chr13:112800791-112800792	mouse	B2_Mm2_chr13:113271666-113271683	470875
ENSMUSG00000021765	Fst	chr13:114458950-114458951	shared	B2_Mm2_chr13:115151026-115151208	692076
ENSMUSG00000021771	Vdac2	chr14:21825237-21825238	shared	B2_Mm2_chr14:21841956-21842145	16719
ENSMUSG00000021772	Nkiras1	chr14:18271135-18271136	mouse	B2_Mm2_chr14:18260453-18260613	10523
ENSMUSG00000021774	Ube2e1	chr14:18331858-18331859	mouse	B2_Mm2_chr14:18260453-18260613	71246
ENSMUSG00000021792	Fam213a	chr14:41013787-41013788	human	B2_Mm2_chr14:37137689-37137850	3875938
ENSMUSG00000021814	Anxa7	chr14:20480132-20480133	mouse	B2_Mm2_chr14:20428682-20428847	51286
ENSMUSG00000021816	Ppp3cb	chr14:20546572-20546573	mouse	B2_Mm2_chr14:20428682-20428847	117726
ENSMUSG00000021822	Plau	chr14:20836659-20836660	mouse	B2_Mm2_chr14:21000482-21000670	163823
ENSMUSG00000021838	Samd4	chr14:46882853-46882854	human	B2_Mm2_chr14:46870102-46870297	12557
ENSMUSG00000021840	Mapk1ip1l	chr14:47298265-47298266	mouse	B2_Mm2_chr14:47453613-47453770	155348
ENSMUSG00000021843	Ktn1	chr14:47648447-47648448	mouse	B2_Mm2_chr14:47453613-47453770	194678
ENSMUSG00000021866	Anxa11	chr14:25842155-25842156	mouse	B2_Mm2_chr14:25830167-25830356	11800
ENSMUSG00000021868	Ppif	chr14:25694153-25694154	human	B2_Mm2_chr14:25830167-25830356	136014
ENSMUSG00000021871	RP23-243M12.7	chr14:50944516-50944517	mouse	B2_Mm2_chr14:50803255-50803444	141073
ENSMUSG00000021877	Arf4	chr14:26638073-26638074	mouse	B2_Mm2_chr14:26698046-26698208	59973
ENSMUSG00000021880	Rnase6	chr14:51123907-51123908	mouse	B2_Mm2_chr14:50803255-50803444	320464
ENSMUSG00000021890	Eaf1	chr14:31494398-31494399	human	B2_Mm2_chr14:31250067-31250218	244181
ENSMUSG00000021891	Mettl6	chr14:31495039-31495040	human	B2_Mm2_chr14:31250067-31250218	244822
ENSMUSG00000021892	Sh3bp5	chr14:31436077-31436078	human	B2_Mm2_chr14:31250067-31250218	185860
ENSMUSG00000021895	Arhgef3	chr14:27114898-27114899	shared	B2_Mm2_chr14:26973154-26973329	141570
ENSMUSG00000021905	Dph3	chr14:32085728-32085729	human	B2_Mm2_chr14:31250067-31250218	835511
ENSMUSG00000021929	Kpna3	chr14:61439873-61439874	mouse	B2_Mm2_chr14:61570197-61570377	130324
ENSMUSG00000021932	Rnaseh2b	chr14:62292588-62292589	mouse	B2_Mm2_chr14:61570197-61570377	722212
ENSMUSG00000021948	Prkcd	chr14:30626209-30626210	human	B2_Mm2_chr14:31004528-31004697	378319
ENSMUSG00000021959	Lats2	chr14:57758387-57758388	mouse	B2_Mm2_chr14:57584737-57584918	173470
ENSMUSG00000021962	Dcp1a	chr14:30479534-30479535	mouse	B2_Mm2_chr14:31004528-31004697	524994
ENSMUSG00000021972	Hmbox1	chr14:64949870-64949871	mouse	B2_Mm2_chr14:64925113-64925257	24614
ENSMUSG00000021974	Fgf9	chr14:58070546-58070547	mouse	B2_Mm2_chr14:57584737-57584918	485629
ENSMUSG00000021975	Ints9	chr14:64950044-64950045	mouse	B2_Mm2_chr14:64925113-64925257	24788
ENSMUSG00000021978	Extl3	chr14:65149854-65149855	mouse	B2_Mm2_chr14:65249153-65249332	99299
ENSMUSG00000021981	Cab39l	chr14:59440971-59440972	human	B2_Mm2_chr14:60185452-60185665	744481
ENSMUSG00000021987	Mtmr6	chr14:60265227-60265228	mouse	B2_Mm2_chr14:60252114-60252291	12937
ENSMUSG00000021990	Spata13	chr14:60634000-60634001	mouse	B2_Mm2_chr14:60466437-60466650	167351
ENSMUSG00000022003	Slc25a30	chr14:75787036-75787037	human	B2_Mm2_chr14:75790858-75791034	3822
ENSMUSG00000022009	Nufip1	chr14:76110890-76110891	mouse	B2_Mm2_chr14:75790858-75791034	319857
ENSMUSG00000022013	Dnajc15	chr14:77875124-77875125	human	B2_Mm2_chr14:76474306-76474494	1400631
ENSMUSG00000022014	Epsti1	chr14:77904238-77904239	shared	B2_Mm2_chr14:76474306-76474494	1429745
ENSMUSG00000022018	Rgcc	chr14:79301644-79301645	mouse	B2_Mm2_chr14:79394540-79394696	92896
ENSMUSG00000022035	Ccdc25	chr14:65837301-65837302	mouse	B2_Mm2_chr14:65597815-65597997	239305
ENSMUSG00000022037	Clu	chr14:65968482-65968483	human	B2_Mm2_chr14:65597815-65597997	370486
ENSMUSG00000022052	Ppp2r2a	chr14:67072443-67072444	mouse	B2_Mm2_chr14:66990952-66991139	81305
ENSMUSG00000022057	Adamdec1	chr14:68582094-68582095	human	B2_Mm2_chr14:66990952-66991139	1590956
ENSMUSG00000022092	Ppp3cc	chr14:70289470-70289471	human	B2_Mm2_chr14:71071780-71071967	782310
ENSMUSG00000022094	Slc39a14	chr14:70351424-70351425	mouse	B2_Mm2_chr14:71071780-71071967	720356
ENSMUSG00000022102	Dok2	chr14:70766035-70766036	mouse	B2_Mm2_chr14:71071780-71071967	305745
ENSMUSG00000022119	Rbm26	chr14:105177326-105177327	mouse	B2_Mm2_chr14:104520148-104520277	657050
ENSMUSG00000022126	Acod1	chr14:103046976-103046977	shared	B2_Mm2_chr14:103003936-103004085	42892
ENSMUSG00000022136	Dnajc3	chr14:118937975-118937976	mouse	B2_Mm2_chr14:118690847-118691036	246940
ENSMUSG00000022148	Fyb	chr15:6522852-6522853	human	B2_Mm2_chr15:6603186-6603367	80334
ENSMUSG00000022150	Dab2	chr15:6299787-6299788	mouse	B2_Mm2_chr15:6334094-6334279	34307
ENSMUSG00000022184	Fbxo4	chr15:3979572-3979573	mouse	B2_Mm2_chr15:5106531-5106716	1126959
ENSMUSG00000022186	Oxct1	chr15:4026382-4026383	mouse	B2_Mm2_chr15:5106531-5106716	1080149
ENSMUSG00000022204	Ngdn	chr14:55015453-55015454	mouse	B2_Mm2_chr14:55038734-55038886	23281
ENSMUSG00000022205	Sub1	chr15:11996982-11996983	human	B2_Mm2_chr15:10874819-10874957	1122026
ENSMUSG00000022208	Jph4	chr14:55116934-55116935	human	B2_Mm2_chr14:55038734-55038886	78049
ENSMUSG00000022216	Psme1	chr14:55578122-55578123	shared	B2_Mm2_chr14:55917053-55917243	338931
ENSMUSG00000022218	Tgm1	chr14:55713925-55713926	shared	B2_Mm2_chr14:55917053-55917243	203128
ENSMUSG00000022220	Adcy4	chr14:55784094-55784095	mouse	B2_Mm2_chr14:55917053-55917243	132959
ENSMUSG00000022234	Cct5	chr15:31601803-31601804	human	B2_Mm2_chr15:33358848-33359037	1757045
ENSMUSG00000022237	Ankrd33b	chr15:31367725-31367726	human	B2_Mm2_chr15:33358848-33359037	1991123
ENSMUSG00000022240	Ctnnd2	chr15:30172592-30172593	human	B2_Mm2_chr15:28048191-28048386	2124207
ENSMUSG00000022241	Tars	chr15:11399664-11399665	human	B2_Mm2_chr15:10874819-10874957	524708
ENSMUSG00000022246	Rai14	chr15:10714623-10714624	mouse	B2_Mm2_chr15:10874819-10874957	160196
ENSMUSG00000022255	Mtdh	chr15:34082693-34082694	mouse	B2_Mm2_chr15:34097135-34097307	14442
ENSMUSG00000022257	Laptm4b	chr15:34238027-34238028	mouse	B2_Mm2_chr15:34327672-34327849	89645
ENSMUSG00000022270	Retreg1	chr15:25843179-25843180	human	B2_Mm2_chr15:25355662-25355845	487335
ENSMUSG00000022283	Pabpc1	chr15:36609667-36609668	mouse	B2_Mm2_chr15:36565452-36565642	44026
ENSMUSG00000022285	Ywhaz	chr15:36796928-36796929	mouse	B2_Mm2_chr15:36565452-36565642	231287
ENSMUSG00000022292	Rrm2b	chr15:37961317-37961318	human	B2_Mm2_chr15:38164619-38164802	203302
ENSMUSG00000022304	Dpys	chr15:39857469-39857470	human	B2_Mm2_chr15:38695549-38695731	1161739
ENSMUSG00000022309	Angpt1	chr15:42676976-42676977	mouse	B2_Mm2_chr15:38695549-38695731	3981246
ENSMUSG00000022329	Stk3	chr15:35178920-35178921	shared	B2_Mm2_chr15:34420565-34420743	758178
ENSMUSG00000022359	Wdyhv1	chr15:58141376-58141377	human	B2_Mm2_chr15:58145934-58145999	4558
ENSMUSG00000022370	Mrpl13	chr15:55557747-55557748	mouse	B2_Mm2_chr15:55275335-55275500	282248
ENSMUSG00000022377	Asap1	chr15:64382918-64382919	human	B2_Mm2_chr15:60626398-60626580	3756339
ENSMUSG00000022378	Fam49b	chr15:64060477-64060478	mouse	B2_Mm2_chr15:60626398-60626580	3433898
ENSMUSG00000022400	Rbx1	chr15:81466295-81466296	mouse	B2_Mm2_chr15:81488087-81488276	21792
ENSMUSG00000022407	Adsl	chr15:80948489-80948490	human	B2_Mm2_chr15:80813086-80813264	135226
ENSMUSG00000022425	Enpp2	chr15:54952891-54952892	human	B2_Mm2_chr15:55023474-55023651	70583
ENSMUSG00000022456	2023-09-03	chr15:82274892-82274893	human	B2_Mm2_chr15:81742460-81742627	532266
ENSMUSG00000022472	Desi1	chr15:82033861-82033862	human	B2_Mm2_chr15:81742460-81742627	291235
ENSMUSG00000022477	Aco2	chr15:81872308-81872309	human	B2_Mm2_chr15:81742460-81742627	129682
ENSMUSG00000022479	Vdr	chr15:97910629-97910630	mouse	B2_Mm2_chr15:98089907-98090100	179278
ENSMUSG00000022498	Txndc11	chr16:11134649-11134650	human	B2_Mm2_chr16:11059643-11059824	74826
ENSMUSG00000022500	Litaf	chr16:11066156-11066157	human	B2_Mm2_chr16:11059643-11059824	6333
ENSMUSG00000022501	Prm1	chr16:10805838-10805839	mouse	B2_Mm2_chr16:10787726-10787882	17957
ENSMUSG00000022503	Nubp1	chr16:10411947-10411948	mouse	B2_Mm2_chr16:10787726-10787882	375779
ENSMUSG00000022504	Ciita	chr16:10480058-10480059	shared	B2_Mm2_chr16:10787726-10787882	307668
ENSMUSG00000022505	Emp2	chr16:10313967-10313968	mouse	B2_Mm2_chr16:10787726-10787882	473759
ENSMUSG00000022508	Bcl6	chr16:23988851-23988852	human	B2_Mm2_chr16:23165972-23166156	822696
ENSMUSG00000022517	Mgrn1	chr16:4886248-4886249	mouse	B2_Mm2_chr16:4721138-4721330	164919
ENSMUSG00000022548	Apod	chr16:31314807-31314808	mouse	B2_Mm2_chr16:30223833-30224013	1090795
ENSMUSG00000022551	Cyc1	chr15:76343522-76343523	shared	B2_Mm2_chr15:76285570-76285748	57775
ENSMUSG00000022552	Sharpin	chr15:76351110-76351111	mouse	B2_Mm2_chr15:76285570-76285748	65363
ENSMUSG00000022561	Gpaa1	chr15:76331230-76331231	mouse	B2_Mm2_chr15:76285570-76285748	45483
ENSMUSG00000022562	Oplah	chr15:76328014-76328015	human	B2_Mm2_chr15:76285570-76285748	42267
ENSMUSG00000022564	Grina	chr15:76246763-76246764	shared	B2_Mm2_chr15:76220572-76220731	26033
ENSMUSG00000022574	Naprt	chr15:75894480-75894481	human	B2_Mm2_chr15:76220572-76220731	326092
ENSMUSG00000022575	Gsdmd	chr15:75862326-75862327	shared	B2_Mm2_chr15:76220572-76220731	358246
ENSMUSG00000022584	Ly6c2	chr15:75111969-75111970	mouse	B2_Mm2_chr15:76220572-76220731	1108603
ENSMUSG00000022586	Ly6i	chr15:74983429-74983430	mouse	B2_Mm2_chr15:76220572-76220731	1237143
ENSMUSG00000022587	Ly6e	chr15:74955050-74955051	mouse	B2_Mm2_chr15:76220572-76220731	1265522
ENSMUSG00000022607	Ptk2	chr15:73423279-73423280	mouse	B2_Mm2_chr15:73596875-73596923	173596
ENSMUSG00000022615	Tymp	chr15:89377038-89377039	human	B2_Mm2_chr15:89430491-89430679	53453
ENSMUSG00000022619	Mapk8ip2	chr15:89453912-89453913	human	B2_Mm2_chr15:89430491-89430679	23234
ENSMUSG00000022635	Zcrb1	chr15:93398333-93398334	mouse	B2_Mm2_chr15:93379354-93379518	18816
ENSMUSG00000022641	Bbx	chr16:50432389-50432390	mouse	B2_Mm2_chr16:50388733-50388911	43479
ENSMUSG00000022663	Atg3	chr16:45158784-45158785	human	B2_Mm2_chr16:45753018-45753199	594234
ENSMUSG00000022684	Bfar	chr16:13671857-13671858	mouse	B2_Mm2_chr16:14311488-14311657	639631
ENSMUSG00000022686	B3gnt5	chr16:19760207-19760208	mouse	B2_Mm2_chr16:20808322-20808488	1048115
ENSMUSG00000022687	Boc	chr16:44558896-44558897	mouse	B2_Mm2_chr16:44186117-44186303	372594
ENSMUSG00000022710	Usp7	chr16:8792307-8792308	mouse	B2_Mm2_chr16:10787726-10787882	1995419
ENSMUSG00000022724	Riox2	chr16:59471774-59471775	mouse	B2_Mm2_chr16:58500898-58501078	970697
ENSMUSG00000022744	Cldnd1	chr16:58727909-58727910	mouse	B2_Mm2_chr16:58500898-58501078	226832
ENSMUSG00000022747	St3gal6	chr16:58524242-58524243	mouse	B2_Mm2_chr16:58500898-58501078	23165
ENSMUSG00000022751	Nit2	chr16:57167340-57167341	human	B2_Mm2_chr16:55972313-55972464	1194877
ENSMUSG00000022755	Adgrg7	chr16:56795854-56795855	mouse	B2_Mm2_chr16:55972313-55972464	823391
ENSMUSG00000022757	Tfg	chr16:56717449-56717450	mouse	B2_Mm2_chr16:55972313-55972464	744986
ENSMUSG00000022765	Snap29	chr16:17405985-17405986	mouse	B2_Mm2_chr16:17398855-17399044	6942
ENSMUSG00000022769	Sdf2l1	chr16:17132382-17132383	mouse	B2_Mm2_chr16:17205111-17205278	72729
ENSMUSG00000022790	Igsf11	chr16:38892670-38892671	mouse	B2_Mm2_chr16:38561763-38561941	330730
ENSMUSG00000022797	Tfrc	chr16:32608919-32608920	mouse	B2_Mm2_chr16:32436301-32436490	172430
ENSMUSG00000022801	Lrch3	chr16:32914099-32914100	mouse	B2_Mm2_chr16:32436301-32436490	477610
ENSMUSG00000022822	Abcc5	chr16:20426393-20426394	mouse	B2_Mm2_chr16:20808322-20808488	381929
ENSMUSG00000022831	Hcls1	chr16:36934982-36934983	mouse	B2_Mm2_chr16:36714042-36714226	220757
ENSMUSG00000022844	Pdia5	chr16:35490872-35490873	mouse	B2_Mm2_chr16:34689506-34689695	801178
ENSMUSG00000022858	Tra2b	chr16:22266004-22266005	mouse	B2_Mm2_chr16:22375010-22375190	109006
ENSMUSG00000022861	Dgkg	chr16:22657220-22657221	shared	B2_Mm2_chr16:22375010-22375190	282031
ENSMUSG00000022863	Btg3	chr16:78377191-78377192	human	B2_Mm2_chr16:91023507-91023643	12646316
ENSMUSG00000022864	D16Ertd472e	chr16:78576707-78576708	shared	B2_Mm2_chr16:91023507-91023643	12446800
ENSMUSG00000022867	Usp25	chr16:77013705-77013706	shared	B2_Mm2_chr16:91023507-91023643	14009802
ENSMUSG00000022883	Robo1	chr16:72308305-72308306	human	B2_Mm2_chr16:58500898-58501078	13807228
ENSMUSG00000022889	Mrpl39	chr16:84735741-84735742	mouse	B2_Mm2_chr16:91023507-91023643	6287766
ENSMUSG00000022892	App	chr16:85173765-85173766	mouse	B2_Mm2_chr16:91023507-91023643	5849742
ENSMUSG00000022895	Ets2	chr16:95702406-95702407	mouse	B2_Mm2_chr16:95963651-95963769	261245
ENSMUSG00000022898	Dscr3	chr16:94526829-94526830	human	B2_Mm2_chr16:94438546-94438716	88114
ENSMUSG00000022900	Ildr1	chr16:36693977-36693978	mouse	B2_Mm2_chr16:36714042-36714226	20065
ENSMUSG00000022901	Cd86	chr16:36666080-36666081	mouse	B2_Mm2_chr16:36714042-36714226	47962
ENSMUSG00000022906	Parp9	chr16:35938469-35938470	shared	B2_Mm2_chr16:36587792-36587974	649323
ENSMUSG00000022911	Arl13b	chr16:62847039-62847040	mouse	B2_Mm2_chr16:58500898-58501078	4345962
ENSMUSG00000022912	Pros1	chr16:62854306-62854307	mouse	B2_Mm2_chr16:58500898-58501078	4353229
ENSMUSG00000022913	Psmg1	chr16:95990902-95990903	human	B2_Mm2_chr16:95963651-95963769	27134
ENSMUSG00000022947	Cbr3	chr16:93683214-93683215	human	B2_Mm2_chr16:93802412-93802599	119198
ENSMUSG00000022952	Runx1	chr16:92826148-92826149	human	B2_Mm2_chr16:92062962-92063142	763007
ENSMUSG00000022962	Gart	chr16:91646951-91646952	human	B2_Mm2_chr16:91731445-91731595	84494
ENSMUSG00000022972	RP24-100B13.1	chr16:90935113-90935114	mouse	B2_Mm2_chr16:91023507-91023643	88394
ENSMUSG00000022992	Kansl2	chr15:98534263-98534264	human	B2_Mm2_chr15:98534597-98534760	334
ENSMUSG00000023000	Dhh	chr15:98898539-98898540	mouse	B2_Mm2_chr15:98928123-98928317	29584
ENSMUSG00000023008	Fmnl3	chr15:99370481-99370482	mouse	B2_Mm2_chr15:99382650-99382818	12169
ENSMUSG00000023010	Tmbim6	chr15:99392881-99392882	mouse	B2_Mm2_chr15:99386765-99386866	6016
ENSMUSG00000023030	Slc11a2	chr15:100425071-100425072	mouse	B2_Mm2_chr15:100395689-100395875	29197
ENSMUSG00000023032	Slc4a8	chr15:100761746-100761747	mouse	B2_Mm2_chr15:100718884-100719062	42685
ENSMUSG00000023045	Soat2	chr15:102150525-102150526	mouse	B2_Mm2_chr15:102226757-102226944	76232
ENSMUSG00000023048	Prr13	chr15:102459027-102459028	mouse	B2_Mm2_chr15:102482146-102482333	23119
ENSMUSG00000023067	Cdkn1a	chr17:29090978-29090979	shared	B2_Mm2_chr17:29178295-29178483	87317
ENSMUSG00000023087	Noct	chr3:51224446-51224447	mouse	B2_Mm2_chr3:51309378-51309528	84932
ENSMUSG00000023094	Msrb2	chr2:19371439-19371440	mouse	B2_Mm2_chr2:18108526-18108707	1262733
ENSMUSG00000023106	Denr	chr5:123907174-123907175	mouse	B2_Mm2_chr5:123898452-123898607	8568
ENSMUSG00000023110	Prmt5	chr14:54517524-54517525	mouse	B2_Mm2_chr14:54589374-54589548	71850
ENSMUSG00000023118	Sympk	chr7:19024376-19024377	human	B2_Mm2_chr7:19281806-19281951	257430
ENSMUSG00000023186	Vwa5a	chr9:38718267-38718268	mouse	B2_Mm2_chr9:37183884-37184030	1534238
ENSMUSG00000023206	Il15ra	chr2:11705289-11705290	shared	B2_Mm2_chr2:11572657-11572839	132451
ENSMUSG00000023224	Serping1	chr2:84775443-84775444	shared	B2_Mm2_chr2:84768317-84768484	6960
ENSMUSG00000023249	Parp3	chr9:106476948-106476949	shared	B2_Mm2_chr9:106229802-106229910	247039
ENSMUSG00000023272	Creld2	chr15:88819645-88819646	mouse	B2_Mm2_chr15:88760499-88760680	58966
ENSMUSG00000023286	Ube2j2	chr4:155943830-155943831	mouse	B2_Mm2_chr4:155766332-155766519	177312
ENSMUSG00000023307	2023-03-05	chr19:37207542-37207543	mouse	B2_Mm2_chr19:37241320-37241522	33778
ENSMUSG00000023341	Mx2	chr16:97535307-97535308	mouse	B2_Mm2_chr16:97516427-97516617	18691
ENSMUSG00000023349	Clec4n	chr6:123229842-123229843	human	B2_Mm2_chr6:122804956-122805134	424709
ENSMUSG00000023460	Rab12	chr17:66519716-66519717	shared	B2_Mm2_chr17:65897576-65897748	621969
ENSMUSG00000023473	Celsr3	chr9:108826319-108826320	human	B2_Mm2_chr9:109016411-109016600	190092
ENSMUSG00000023755	Rhebl1	chr15:98894539-98894540	human	B2_Mm2_chr15:98928123-98928317	33584
ENSMUSG00000023827	Agpat4	chr17:12118703-12118704	mouse	B2_Mm2_chr17:12306354-12306535	187651
ENSMUSG00000023829	Slc22a1	chr17:12675837-12675838	human	B2_Mm2_chr17:12838605-12838775	162768
ENSMUSG00000023830	Igf2r	chr17:12769663-12769664	human	B2_Mm2_chr17:12838605-12838775	68942
ENSMUSG00000023852	Chd1	chr17:15704966-15704967	shared	B2_Mm2_chr17:12988179-12988366	2716601
ENSMUSG00000023903	Mmp25	chr17:23645268-23645269	shared	B2_Mm2_chr17:23652588-23652771	7320
ENSMUSG00000023905	Tnfrsf12a	chr17:23677448-23677449	mouse	B2_Mm2_chr17:23653147-23653272	24177
ENSMUSG00000023913	Pla2g7	chr17:43568097-43568098	human	B2_Mm2_chr17:45582818-45582998	2014721
ENSMUSG00000023927	Satb1	chr17:51833289-51833290	mouse	B2_Mm2_chr17:51405994-51406183	427107
ENSMUSG00000023939	Mrpl14	chr17:45686321-45686322	human	B2_Mm2_chr17:45582818-45582998	103324
ENSMUSG00000023944	Hsp90ab1	chr17:45573270-45573271	human	B2_Mm2_chr17:45582818-45582998	9548
ENSMUSG00000023947	Nfkbie	chr17:45555715-45555716	shared	B2_Mm2_chr17:45582818-45582998	27103
ENSMUSG00000023952	Gtpbp2	chr17:46161031-46161032	mouse	B2_Mm2_chr17:46185450-46185625	24419
ENSMUSG00000023959	Clic5	chr17:44188571-44188572	mouse	B2_Mm2_chr17:45582818-45582998	1394247
ENSMUSG00000023961	Enpp4	chr17:44105808-44105809	shared	B2_Mm2_chr17:45582818-45582998	1477010
ENSMUSG00000023982	Guca1a	chr17:47400583-47400584	mouse	B2_Mm2_chr17:47643123-47643303	242540
ENSMUSG00000023988	Bysl	chr17:47611491-47611492	mouse	B2_Mm2_chr17:47643123-47643303	31632
ENSMUSG00000023991	Foxp4	chr17:47924644-47924645	mouse	B2_Mm2_chr17:48043254-48043434	118610
ENSMUSG00000024013	Fgd2	chr17:29360913-29360914	shared	B2_Mm2_chr17:29381888-29382043	20975
ENSMUSG00000024014	Pim1	chr17:29490811-29490812	shared	B2_Mm2_chr17:29498400-29498553	7589
ENSMUSG00000024018	Ccdc167	chr17:29717011-29717012	mouse	B2_Mm2_chr17:29518324-29518510	198502
ENSMUSG00000024019	Cmtr1	chr17:29660594-29660595	mouse	B2_Mm2_chr17:29518324-29518510	142085
ENSMUSG00000024030	Abcg1	chr17:31057697-31057698	mouse	B2_Mm2_chr17:31282232-31282387	224535
ENSMUSG00000024036	Slc37a1	chr17:31295482-31295483	shared	B2_Mm2_chr17:31282232-31282387	13096
ENSMUSG00000024043	Arhgap28	chr17:68004119-68004120	mouse	B2_Mm2_chr17:65897576-65897748	2106372
ENSMUSG00000024054	Smchd1	chr17:71475342-71475343	shared	B2_Mm2_chr17:71622656-71622834	147314
ENSMUSG00000024066	Xdh	chr17:73950181-73950182	mouse	B2_Mm2_chr17:74459277-74459470	509096
ENSMUSG00000024070	Prkd3	chr17:79020815-79020816	mouse	B2_Mm2_chr17:78880851-78881043	139773
ENSMUSG00000024074	Crim1	chr17:78200247-78200248	shared	B2_Mm2_chr17:78880851-78881043	680604
ENSMUSG00000024079	Eif2ak2	chr17:78882572-78882573	mouse	B2_Mm2_chr17:78880851-78881043	1530
ENSMUSG00000024083	Pja2	chr17:64331915-64331916	mouse	B2_Mm2_chr17:64334574-64334758	2659
ENSMUSG00000024084	Qpct	chr17:79051905-79051906	human	B2_Mm2_chr17:78880851-78881043	170863
ENSMUSG00000024085	Man2a1	chr17:64600735-64600736	mouse	B2_Mm2_chr17:64471297-64471408	129328
ENSMUSG00000024091	Vapa	chr17:65613554-65613555	mouse	B2_Mm2_chr17:65729500-65729676	115946
ENSMUSG00000024095	Hnrnpll	chr17:80062333-80062334	human	B2_Mm2_chr17:80208671-80208846	146338
ENSMUSG00000024097	Srsf7	chr17:80207304-80207305	human	B2_Mm2_chr17:80208671-80208846	1367
ENSMUSG00000024098	Twsg1	chr17:65951186-65951187	mouse	B2_Mm2_chr17:65897576-65897748	53439
ENSMUSG00000024121	Atp6v0c	chr17:24169701-24169702	shared	B2_Mm2_chr17:24428372-24428551	258671
ENSMUSG00000024132	Eci1	chr17:24426682-24426683	mouse	B2_Mm2_chr17:24428372-24428551	1690
ENSMUSG00000024135	Srbd1	chr17:86145174-86145175	human	B2_Mm2_chr17:86918888-86919074	773714
ENSMUSG00000024143	Rhoq	chr17:86963081-86963082	shared	B2_Mm2_chr17:86918888-86919074	44008
ENSMUSG00000024145	Pigf	chr17:87025405-87025406	mouse	B2_Mm2_chr17:86918888-86919074	106332
ENSMUSG00000024146	Cript	chr17:87025549-87025550	mouse	B2_Mm2_chr17:86918888-86919074	106476
ENSMUSG00000024164	C3	chr17:57228135-57228136	mouse	B2_Mm2_chr17:56301758-56301943	926193
ENSMUSG00000024193	Phf1	chr17:26933126-26933127	human	B2_Mm2_chr17:26975511-26975686	42385
ENSMUSG00000024213	Nudt3	chr17:27623494-27623495	mouse	B2_Mm2_chr17:27572269-27572412	51083
ENSMUSG00000024217	Snrpc	chr17:27839973-27839974	mouse	B2_Mm2_chr17:27826636-27826802	13172
ENSMUSG00000024218	Taf11	chr17:27909241-27909242	mouse	B2_Mm2_chr17:27873793-27873954	35288
ENSMUSG00000024231	Cul2	chr18:3382987-3382988	mouse	B2_Mm2_chr18:3428241-3428379	45254
ENSMUSG00000024235	Map3k8	chr18:4353014-4353015	mouse	B2_Mm2_chr18:4279700-4279883	73132
ENSMUSG00000024242	Map4k3	chr17:80728092-80728093	human	B2_Mm2_chr17:80237409-80237575	490518
ENSMUSG00000024245	Tmem178	chr17:80944631-80944632	mouse	B2_Mm2_chr17:80237409-80237575	707057
ENSMUSG00000024247	Pkdcc	chr17:83215291-83215292	mouse	B2_Mm2_chr17:83248970-83249140	33679
ENSMUSG00000024290	Rock1	chr18:10181791-10181792	mouse	B2_Mm2_chr18:10006608-10006763	175029
ENSMUSG00000024308	Tapbp	chr17:33915898-33915899	shared	B2_Mm2_chr17:33897222-33897390	18509
ENSMUSG00000024334	H2-Oa	chr17:34092339-34092340	shared	B2_Mm2_chr17:34132397-34132578	40058
ENSMUSG00000024335	Brd2	chr17:34122633-34122634	mouse	B2_Mm2_chr17:34132397-34132578	9764
ENSMUSG00000024338	Psmb8	chr17:34197720-34197721	shared	B2_Mm2_chr17:34206060-34206220	8340
ENSMUSG00000024339	Tap2	chr17:34203526-34203527	mouse	B2_Mm2_chr17:34206060-34206220	2534
ENSMUSG00000024340	Btnl2	chr17:34354821-34354822	mouse	B2_Mm2_chr17:34439404-34439566	84583
ENSMUSG00000024346	Pfdn1	chr18:36454494-36454495	human	B2_Mm2_chr18:36628483-36628662	173989
ENSMUSG00000024349	Tmem173	chr18:35740553-35740554	mouse	B2_Mm2_chr18:35746190-35746379	5637
ENSMUSG00000024359	Hspa9	chr18:34954356-34954357	human	B2_Mm2_chr18:34890857-34891050	63307
ENSMUSG00000024360	Etf1	chr18:34932006-34932007	mouse	B2_Mm2_chr18:34890857-34891050	40957
ENSMUSG00000024371	C2	chr17:34898264-34898265	human	B2_Mm2_chr17:34879060-34879246	19019
ENSMUSG00000024378	Stard4	chr18:33213861-33213862	human	B2_Mm2_chr18:34342888-34342932	1129027
ENSMUSG00000024388	Myo7b	chr18:32036960-32036961	human	B2_Mm2_chr18:34342888-34342932	2305928
ENSMUSG00000024399	Ltb	chr17:35194438-35194439	mouse	B2_Mm2_chr17:35185761-35185930	8509
ENSMUSG00000024401	Tnf	chr17:35202006-35202007	shared	B2_Mm2_chr17:35185761-35185930	16077
ENSMUSG00000024404	Riok3	chr18:12128849-12128850	shared	B2_Mm2_chr18:10750303-10750494	1378356
ENSMUSG00000024410	AC102096.1	chr18:12168716-12168717	human	B2_Mm2_chr18:10750303-10750494	1418223
ENSMUSG00000024421	Lama3	chr18:12333818-12333819	human	B2_Mm2_chr18:10750303-10750494	1583325
ENSMUSG00000024429	Gnl1	chr17:35979850-35979851	mouse	B2_Mm2_chr17:36021964-36022153	42114
ENSMUSG00000024431	Nr3c1	chr18:39491300-39491301	human	B2_Mm2_chr18:38457010-38457171	1034130
ENSMUSG00000024456	Diaph1	chr18:37935475-37935476	shared	B2_Mm2_chr18:37924076-37924266	11210
ENSMUSG00000024457	Trim26	chr17:36837133-36837134	shared	B2_Mm2_chr17:36826578-36826763	10371
ENSMUSG00000024462	Gabbr1	chr17:37045965-37045966	human	B2_Mm2_chr17:36826578-36826763	219203
ENSMUSG00000024472	Dcp2	chr18:44380501-44380502	mouse	B2_Mm2_chr18:46347885-46348069	1967384
ENSMUSG00000024486	Hbegf	chr18:36515804-36515805	shared	B2_Mm2_chr18:36628483-36628662	112679
ENSMUSG00000024493	Lars	chr18:42262121-42262122	mouse	B2_Mm2_chr18:42261254-42261437	685
ENSMUSG00000024498	Tcerg1	chr18:42511509-42511510	mouse	B2_Mm2_chr18:42309881-42310065	201445
ENSMUSG00000024503	Spink1	chr18:43737236-43737237	human	B2_Mm2_chr18:42309881-42310065	1427172
ENSMUSG00000024513	Mbd2	chr18:70568188-70568189	shared	B2_Mm2_chr18:67678902-67679028	2889161
ENSMUSG00000024524	Gnal	chr18:67088335-67088336	mouse	B2_Mm2_chr18:67147536-67147711	59201
ENSMUSG00000024535	Snx24	chr18:53245661-53245662	mouse	B2_Mm2_chr18:53144758-53144947	100715
ENSMUSG00000024539	Ptpn2	chr18:67724594-67724595	shared	B2_Mm2_chr18:67678902-67679028	45567
ENSMUSG00000024548	Setbp1	chr18:79109390-79109391	human	B2_Mm2_chr18:77621074-77621253	1488138
ENSMUSG00000024575	Pde6a	chr18:61220481-61220482	mouse	B2_Mm2_chr18:60981814-60982004	238478
ENSMUSG00000024581	Napg	chr18:62977835-62977836	mouse	B2_Mm2_chr18:61930708-61930872	1046964
ENSMUSG00000024588	Fech	chr18:64489065-64489066	human	B2_Mm2_chr18:65500711-65500875	1011646
ENSMUSG00000024590	Lmnb1	chr18:56707812-56707813	human	B2_Mm2_chr18:56606643-56606816	100997
ENSMUSG00000024601	Isoc1	chr18:58659481-58659482	shared	B2_Mm2_chr18:57131287-57131464	1528018
ENSMUSG00000024610	Cd74	chr18:60803847-60803848	human	B2_Mm2_chr18:60893306-60893492	89459
ENSMUSG00000024639	Gnaq	chr19:16132830-16132831	mouse	B2_Mm2_chr19:12780616-12780792	3352039
ENSMUSG00000024640	Psat1	chr19:15947336-15947337	human	B2_Mm2_chr19:12780616-12780792	3166545
ENSMUSG00000024642	Tle4	chr19:14598050-14598051	mouse	B2_Mm2_chr19:12780616-12780792	1817259
ENSMUSG00000024644	Cndp2	chr18:84685632-84685633	shared	B2_Mm2_chr18:84683670-84683868	1765
ENSMUSG00000024646	Cyb5a	chr18:84851337-84851338	human	B2_Mm2_chr18:84960651-84960822	109314
ENSMUSG00000024666	Tmem138	chr19:10577361-10577362	human	B2_Mm2_chr19:10557261-10557449	19913
ENSMUSG00000024668	Sdhaf2	chr19:10525208-10525209	mouse	B2_Mm2_chr19:10557261-10557449	32053
ENSMUSG00000024675	Ms4a4c	chr19:11404769-11404770	mouse	B2_Mm2_chr19:12024035-12024218	619266
ENSMUSG00000024679	Ms4a6d	chr19:11604848-11604849	mouse	B2_Mm2_chr19:12024035-12024218	419187
ENSMUSG00000024712	Rfk	chr19:17394042-17394043	mouse	B2_Mm2_chr19:12780616-12780792	4613251
ENSMUSG00000024732	Ccdc86	chr19:10949265-10949266	mouse	B2_Mm2_chr19:10557261-10557449	391817
ENSMUSG00000024736	Tmem132a	chr19:10869939-10869940	shared	B2_Mm2_chr19:10557261-10557449	312491
ENSMUSG00000024737	Slc15a3	chr19:10839726-10839727	shared	B2_Mm2_chr19:10557261-10557449	282278
ENSMUSG00000024754	Tmem2	chr19:21778341-21778342	mouse	B2_Mm2_chr19:23981234-23981424	2202893
ENSMUSG00000024772	Ehd1	chr19:6276724-6276725	shared	B2_Mm2_chr19:6064919-6065103	211622
ENSMUSG00000024774	Ankrd22	chr19:34166052-34166053	human	B2_Mm2_chr19:34022851-34023034	143019
ENSMUSG00000024776	Stambpl1	chr19:34192228-34192229	human	B2_Mm2_chr19:34022851-34023034	169195
ENSMUSG00000024777	Ppp2r5b	chr19:6235871-6235872	mouse	B2_Mm2_chr19:6064919-6065103	170769
ENSMUSG00000024778	Fas	chr19:34290658-34290659	mouse	B2_Mm2_chr19:34471720-34471895	181062
ENSMUSG00000024786	AC127556.1	chr19:6184387-6184388	mouse	B2_Mm2_chr19:6064919-6065103	119285
ENSMUSG00000024787	Snx15	chr19:6128303-6128304	mouse	B2_Mm2_chr19:6064919-6065103	63201
ENSMUSG00000024789	Jak2	chr19:29251827-29251828	shared	B2_Mm2_chr19:28992295-28992477	259351
ENSMUSG00000024803	Ankrd1	chr19:36119843-36119844	human	B2_Mm2_chr19:36449700-36449879	329857
ENSMUSG00000024805	Pcgf5	chr19:36348308-36348309	shared	B2_Mm2_chr19:36449700-36449879	101392
ENSMUSG00000024807	Syvn1	chr19:6046575-6046576	mouse	B2_Mm2_chr19:6064756-6064914	18181
ENSMUSG00000024816	Frmd8	chr19:5875273-5875274	mouse	B2_Mm2_chr19:6018525-6018714	143252
ENSMUSG00000024818	Slc25a45	chr19:5877807-5877808	human	B2_Mm2_chr19:6018525-6018714	140718
ENSMUSG00000024824	Rad9a	chr19:4201602-4201603	mouse	B2_Mm2_chr19:4255878-4256061	54276
ENSMUSG00000024826	Dpf2	chr19:5913009-5913010	mouse	B2_Mm2_chr19:6018525-6018714	105516
ENSMUSG00000024833	Pola2	chr19:5964205-5964206	mouse	B2_Mm2_chr19:6018525-6018714	54320
ENSMUSG00000024855	Pacs1	chr19:5273118-5273119	mouse	B2_Mm2_chr19:5277206-5277344	4088
ENSMUSG00000024887	Asah2	chr19:32061468-32061469	mouse	B2_Mm2_chr19:32521522-32521711	460054
ENSMUSG00000024896	Minpp1	chr19:32485768-32485769	mouse	B2_Mm2_chr19:32521522-32521711	35754
ENSMUSG00000024899	Papss2	chr19:32620004-32620005	mouse	B2_Mm2_chr19:32521522-32521711	98294
ENSMUSG00000024908	Ppp6r3	chr19:3575748-3575749	mouse	B2_Mm2_chr19:3563476-3563662	12087
ENSMUSG00000024910	Ctsw	chr19:5468497-5468498	human	B2_Mm2_chr19:5473006-5473200	4509
ENSMUSG00000024912	Fosl1	chr19:5447702-5447703	human	B2_Mm2_chr19:5473006-5473200	25304
ENSMUSG00000024942	Capn1	chr19:6015824-6015825	mouse	B2_Mm2_chr19:6018525-6018714	2701
ENSMUSG00000024944	Arl2	chr19:6141405-6141406	mouse	B2_Mm2_chr19:6064919-6065103	76303
ENSMUSG00000024949	Sf1	chr19:6363689-6363690	mouse	B2_Mm2_chr19:6064919-6065103	298587
ENSMUSG00000024952	Rps6ka4	chr19:6840600-6840601	mouse	B2_Mm2_chr19:6891375-6891559	50775
ENSMUSG00000024953	Prdx5	chr19:6910105-6910106	shared	B2_Mm2_chr19:6891375-6891559	18547
ENSMUSG00000024955	Esrra	chr19:6921812-6921813	shared	B2_Mm2_chr19:6891375-6891559	30254
ENSMUSG00000024966	Stip1	chr19:7040025-7040026	human	B2_Mm2_chr19:6891375-6891559	148467
ENSMUSG00000024970	Spindoc	chr19:7383025-7383026	mouse	B2_Mm2_chr19:7368614-7368806	14220
ENSMUSG00000024981	Acsl5	chr19:55251937-55251938	shared	B2_Mm2_chr19:53638139-53638324	1613614
ENSMUSG00000024985	Tcf7l2	chr19:55741809-55741810	shared	B2_Mm2_chr19:57074825-57075013	1333016
ENSMUSG00000025017	Pik3ap1	chr19:41385069-41385070	shared	B2_Mm2_chr19:41341664-41341691	43379
ENSMUSG00000025019	Lcor	chr19:41482644-41482645	mouse	B2_Mm2_chr19:41341664-41341691	140954
ENSMUSG00000025040	Fundc1	chrX:17572324-17572325	mouse	B2_Mm2_chrX:20069251-20069439	2496927
ENSMUSG00000025058	RP23-311G7.1	chrX:85870353-85870354	mouse	B2_Mm2_chrX:94040337-94040443	8169984
ENSMUSG00000025059	Gk	chrX:85776818-85776819	mouse	B2_Mm2_chrX:94040337-94040443	8263519
ENSMUSG00000025068	Gsto1	chr19:47854969-47854970	human	B2_Mm2_chr19:47432846-47433001	421969
ENSMUSG00000025076	Casp7	chr19:56397128-56397129	shared	B2_Mm2_chr19:57074825-57075013	677697
ENSMUSG00000025089	Gfra1	chr19:58455908-58455909	mouse	B2_Mm2_chr19:57074825-57075013	1380896
ENSMUSG00000025132	Arhgdia	chr11:120581623-120581624	mouse	B2_Mm2_chr11:120584377-120584565	2754
ENSMUSG00000025161	Slc16a3	chr11:120948479-120948480	mouse	B2_Mm2_chr11:120584377-120584565	363915
ENSMUSG00000025162	Csnk1d	chr11:120991329-120991330	mouse	B2_Mm2_chr11:120584377-120584565	406765
ENSMUSG00000025165	Sectm1a	chr11:121081219-121081220	mouse	B2_Mm2_chr11:120584377-120584565	496655
ENSMUSG00000025171	Ubtd1	chr19:41981762-41981763	mouse	B2_Mm2_chr19:41980275-41980443	1320
ENSMUSG00000025198	Erlin1	chr19:44069784-44069785	human	B2_Mm2_chr19:43891456-43891652	178133
ENSMUSG00000025199	Chuk	chr19:44107479-44107480	shared	B2_Mm2_chr19:43891456-43891652	215828
ENSMUSG00000025225	Nfkb2	chr19:46304736-46304737	shared	B2_Mm2_chr19:45626131-45626144	678593
ENSMUSG00000025228	Actr1a	chr19:46395734-46395735	mouse	B2_Mm2_chr19:47111597-47111773	715863
ENSMUSG00000025234	Arih1	chr9:59486617-59486618	mouse	B2_Mm2_chr9:59546036-59546227	59419
ENSMUSG00000025236	Adpgk	chr9:59291557-59291558	human	B2_Mm2_chr9:59546036-59546227	254479
[truncated: 2,779 more rows]
