# Supplementary material for: Mouse B2 SINE elements function as IFN-inducible enhancers
Source: eLife. 2023 May 9;12:e82617. doi: 10.7554/eLife.82617 (PMC10229128; doi:10.7554/eLife.82617)
Supplement: Supplementary file 8. [file elife-82617-supp8.xlsx]

## Sheet: Description
Supplemental Table S8
DESeq2 gene-level results for murine J774s, WT and KOs, untreated or stimulated with mIFNG for 4
Sheets
UT KO2 vs UT WT1,2,3	DESeq2 output for untreated WT1, WT2, and WT3 vs untreated KO2 murine J774s
UT KO1 vs UT WT1,2,3	DESeq2 output for untreated WT1, WT2, and WT3 vs untreated KO1 murine J774s
mIFNG KO2 vs mIFNG WT1,2,3	DESeq2 output for mIFNG WT1, WT2, and WT3 vs mIFNG KO2 murine J774s
mIFNG KO1 vs mIFNG WT1,2,3	DESeq2 output for mIFNG WT1, WT2, and WT3 vs mIFNG KO1 murine J774s
UT KO1,2 vs mIFNG KO1,2	DESeq2 output for untreated KO1 and KO2 vs mIFNG KO1 and KO2 murine J774s
UT WT1,2,3 vs mIFNG WT1,2,3	DESeq2 output for untreated WT1, WT2, and WT3 vs mIFNG WT1, WT2, and WT3 murine J774s
UT KO1 vs mIFNG KO1	DESeq2 output for untreated KO1 vs mIFNG KO1 murine J774s
UT KO2 vs mIFNG KO2	DESeq2 output for untreated KO2 vs mIFNG KO2 murine J774s
mIFNG KO1,2 vs mIFNG WT1,2,3	DESeq2 output for mIFNG KO1 and KO2 vs mIFNG WT1, WT2, and WT3 murine J774s
UT KO1,2 vs UT WT1,2,3	DESeq2 output for UT KO1 and KO2 vs UT WT1, WT2, and WT3 murine J774s
UT WT1 vs mIFNG WT1	DESeq2 output for untreated WT1 vs mIFNG WT1 murine J774s
UT WT2 vs mIFNG WT2	DESeq2 output for untreated WT2 vs mIFNG WT2 murine J774s
UT WT3 vs mIFNG WT3	DESeq2 output for untreated WT3 vs mIFNG WT3 murine J774s
UT vs mIFNG - all samples	DESeq2 output for untreated WT1, WT2, WT3, KO1, and KO2 vs mIFNG WT1, WT2, WT3, KO1, and KO2 murine J774s

## Sheet: UT KO2 vs UT WT1,2,3
Column1	gene	baseMean	log2FoldChange	lfcSE	stat	pvalue	padj	KO2 UT R1	KO2 UT R2	KO2 UT R3	WT2 UT R1	WT2 UT R2	WT2 UT R3	WT3 UT R1	WT3 UT R2	WT3 UT R3	WT1 UT R1	WT1 UT R2	WT1 UT R3
1	Clec4a1	1405.96	-1.01896	0.0446433	-22.8244	2.62338e-115	3.92956e-111	783.789	777.265	821.9	1603.11	1569.28	1615.01	1676.16	1585.32	1622.95	1554.49	1618.59	1643.72
2	Parvg	4419.65	-0.743091	0.045682	-16.2666	1.7036e-59	1.27591e-55	2826.55	3115.29	2866.83	5066.98	5055.1	4809.78	5151.54	5008.69	4913.43	4747.8	4680.08	4793.78
3	Pla2g7	140.734	10.8701	0.692012	15.708	1.33382e-55	6.65974e-52	536.9	518.176	631.16	0	0	1.53226	0	1.04435	0	0	0	0
4	1190002N15Rik	3405.59	-0.675429	0.0444564	-15.1931	3.93138e-52	1.4722e-48	2473.97	2428.84	2156.26	3820.54	3681.46	3723.4	3827.25	3712.65	3710.75	3732.25	3726.01	3873.66
5	Slc16a10	3231.31	0.619485	0.0421754	14.6883	7.65971e-49	2.2947e-45	4373.83	4288.76	4463.96	2998.05	2893.75	3024.69	2771.64	2790.49	2702.66	2735.03	2847.58	2885.26
6	C1ra	753.088	-0.856042	0.0650548	-13.1588	1.51509e-39	3.78243e-36	442.203	467.427	494.45	898.653	920.878	870.326	816.411	786.393	827.013	822.158	842.642	848.508
7	Btbd3	275.32	0.979856	0.0747733	13.1044	3.10867e-39	6.65211e-36	421.91	447.84	437.965	220.855	216.135	240.565	201.069	238.111	224.32	208.06	216.354	230.654
8	Ckap4	711.651	-0.942392	0.0742391	-12.694	6.38348e-37	1.19523e-33	438.821	438.936	383.935	931.654	807.177	790.648	822.478	790.57	809.446	773.58	752.359	800.212
9	Atp2a3	3756.84	-1.2854	0.102652	-12.5219	5.66638e-36	9.43074e-33	1772.19	1834.1	1818.99	4174.67	3945.74	3816.87	4370.66	4056.24	4164.79	5097.01	4682.52	5348.35
10	Copg1	3781.56	-0.367798	0.0312109	-11.7843	4.70362e-32	7.04555e-29	3095.42	3131.32	3085.4	4062.98	4099.39	4037.52	3951.19	3994.63	4090.47	3822.99	4017.19	3990.23
11	Anpep	1903.18	-12.1282	1.04263	-11.6323	2.82472e-31	3.8465e-28	0.845512	0	0.818625	2877.47	2677.61	3061.46	2748.24	2720.52	3436.43	1614.99	1817.05	1882.7
12	Errfi1	167.536	1.1383	0.0983203	11.5774	5.36333e-31	6.69477e-28	307.766	281.347	264.416	126.928	119.847	121.049	148.202	126.366	117.566	141.151	133.391	122.405
13	Bivm	654.508	-0.644185	0.0562633	-11.4495	2.3662e-30	2.71965e-27	465.877	472.769	442.058	759.032	734.449	706.374	710.676	704.934	713.501	718.586	688.917	736.928
14	Cep170b	754.696	-1.34842	0.117836	-11.4432	2.5419e-30	2.71965e-27	335.668	357.025	356.102	766.647	729.327	787.584	1002.75	992.129	1043.23	878.069	838.575	969.247
15	Mkrn1	3233.82	-0.470618	0.0413497	-11.3814	5.17589e-30	5.16864e-27	2518.78	2525	2481.25	3420.72	3510.4	3420.01	3465.85	3326.24	3616.15	3590.18	3297.37	3633.84
16	Camk2a	181.86	-1.19301	0.106153	-11.2386	2.63467e-29	2.46654e-26	87.0877	89.9241	100.691	220.855	225.354	208.388	226.203	213.047	193.24	204.394	204.967	208.172
17	Il7r	197.498	-4.07585	0.370124	-11.0121	3.3407e-28	2.94355e-25	16.9102	14.2454	14.7353	294.474	295.009	422.905	143.002	123.233	154.051	260.304	283.05	348.063
18	Ifi204	665.125	-0.913387	0.0831275	-10.9878	4.37546e-28	3.64111e-25	415.146	400.652	384.754	704.453	770.301	784.519	669.942	705.978	766.203	722.253	865.416	791.885
19	Rras2	79.9513	-4.62759	0.423581	-10.9249	8.76102e-28	6.90691e-25	4.22756	2.67101	5.73038	99.0041	110.628	91.9358	129.135	136.809	136.484	89.8233	80.5227	72.4437
20	Edem1	6643.41	-0.440394	0.0417988	-10.536	5.89262e-26	4.41328e-23	5360.54	5241.42	5121.32	6981.06	7085.33	7123.5	6771.36	6734.99	7133.66	7276.6	7352.78	7538.31
21	Chst10	358.115	-0.975107	0.0934332	-10.4364	1.69087e-25	1.20607e-22	199.541	218.133	204.656	412.517	482.462	438.228	406.472	411.472	382.426	378.541	377.399	385.534
22	Art3	92.4191	-5.94196	0.571872	-10.3904	2.74328e-25	1.8678e-22	1.69102	2.67101	1.63725	149.776	159.796	148.63	93.6013	97.1242	106.755	115.487	124.444	107.417
23	Fah	243.701	-1.72395	0.167013	-10.3222	5.59152e-25	3.64154e-22	78.6326	89.0338	100.691	314.782	259.157	278.872	242.67	234.978	270.266	335.463	332.665	387.199
24	Ppp4r2	2380.68	-0.460017	0.0450417	-10.2131	1.73197e-24	1.08096e-21	1992.03	1790.47	1788.7	2491.6	2658.15	2629.37	2586.17	2518.96	2548.6	2506.8	2470.18	2587.16
25	Gas6	722.674	-7.47919	0.738445	-10.1283	4.13786e-24	2.47924e-21	5.91858	5.34203	4.91175	936.732	815.372	730.89	1814.82	1755.55	1799.97	248.389	296.063	258.133
26	Actr1b	2788.71	-0.395022	0.0393241	-10.0453	9.63593e-24	5.55141e-21	2184.8	2337.14	2242.21	2939.66	2961.36	3087.51	2983.97	2922.08	3067.51	2846.85	2867.91	3023.49
27	Antxr1	221.493	-2.46363	0.247144	-9.96841	2.09548e-23	1.16253e-20	52.4217	57.8719	41.7499	238.625	230.476	191.533	246.137	219.313	239.185	339.129	402.614	398.857
28	Col4a5	866.449	0.756499	0.0766351	9.87143	5.53683e-23	2.96201e-20	1253.89	1288.32	1204.2	734.915	682.208	746.213	691.609	664.204	756.744	865.237	727.958	781.893
29	Kdelc1	702.33	-0.605238	0.0615737	-9.82949	8.40412e-23	4.34087e-20	517.453	488.795	507.548	741.262	764.155	804.439	710.676	770.728	778.365	742.417	769.439	832.687
30	Tiam1	280.146	2.52984	0.258449	9.78853	1.26117e-22	6.29703e-20	741.514	753.226	721.209	85.042	75.8009	82.7423	104.001	115.922	141.889	169.564	197.647	173.199
31	Atp1b3	13219.3	1.12331	0.115551	9.7213	2.44647e-22	1.18212e-19	22956.5	21458	22314.1	10274.9	10221.9	10261.6	11400.3	11252.8	12557.9	8609.29	8354.84	8969.7
32	Prune2	1585.54	-0.485882	0.050401	-9.64034	5.40111e-22	2.52822e-19	1235.29	1195.72	1230.39	1631.03	1648.16	1673.23	1743.76	1692.89	1663.48	1741.47	1695.86	1875.21
33	Ncapd2	5446.94	-0.41108	0.0427399	-9.61818	6.70078e-22	3.04155e-19	4408.5	4390.25	4303.51	5805.7	5914.52	5732.2	5973.15	6077.05	5759.36	5291.33	5883.04	5824.64
34	Gm11613	93.8647	-1.59572	0.166195	-9.60153	7.87679e-22	3.47019e-19	32.975	40.0652	38.4754	112.966	122.92	122.581	124.802	112.789	112.16	118.237	95.9766	92.4282
35	Xrn2	6443.4	0.42892	0.0447274	9.58965	8.83885e-22	3.78277e-19	8068.72	8042.42	7843.25	5768.9	6008.76	6024.86	5590.08	5832.67	5626.93	5955.83	6317.37	6240.99
36	Fosb	273.953	-3.27866	0.343227	-9.55245	1.26661e-21	5.27017e-19	32.975	41.8459	34.3823	515.329	419.978	315.646	604.941	434.448	263.509	222.725	232.621	169.035
37	Nfya	4788	0.410516	0.0437828	9.37618	6.84042e-21	2.76926e-18	5902.52	5888.69	5858.9	4309.22	4194.66	4166.23	4530.13	4389.39	4367.49	4525.99	4623.96	4698.85
38	Eogt	866.234	-0.604868	0.0645617	-9.36882	7.33445e-21	2.89112e-18	610.459	621.456	638.528	916.423	936.243	951.536	897.879	913.803	910.795	938.562	985.793	1073.33
39	Kif11	5606.49	-0.310544	0.0331969	-9.35462	8.39015e-21	3.22246e-18	4920.03	4695.64	4639.15	5907.25	6063.05	5874.7	5890.81	5899.51	5701.25	5735.86	6103.46	5847.13
40	Adamtsl5	88.3626	-1.85338	0.198306	-9.34607	9.09608e-21	3.40626e-18	27.0564	30.2715	31.9264	90.1192	87.0686	117.984	122.202	118.011	131.079	110.904	82.1495	111.58
41	Msrb1	1917.73	0.5482	0.0589862	9.2937	1.4902e-20	5.44432e-18	2421.55	2496.51	2621.24	1671.65	1745.47	1674.76	1735.96	1613.52	1894.56	1818.46	1576.29	1742.81
42	Arap2	1323.5	-1.18874	0.128118	-9.27846	1.71946e-20	6.13234e-18	727.985	759.458	538.655	1526.95	1535.48	1478.63	1752.42	1783.74	1763.48	1360.18	1316.83	1338.13
43	Dapk1	990.702	0.777429	0.0841567	9.23787	2.51441e-20	8.75893e-18	1466.96	1422.76	1431.78	865.652	786.69	828.955	987.147	886.65	883.769	737.834	744.225	846.01
44	Naaa	264.994	0.894228	0.0980244	9.1225	7.34123e-20	2.49919e-17	405.846	403.323	405.22	213.24	203.843	209.92	233.136	263.175	247.293	208.977	192.767	193.183
45	Arhgdib	17941.5	-0.311602	0.0342852	-9.08854	1.00379e-19	3.3413e-17	15362.1	15117.9	15098.7	19147.1	19158.2	19634.4	18179.4	17798.8	18798.3	18681.4	19083.9	19237.6
46	Ptms	5837.38	-0.428702	0.0476093	-9.0046	2.16461e-19	7.04862e-17	4601.27	4630.65	4675.17	6205.53	5719.89	5865.51	6626.62	6378.87	6383.67	6262.88	6446.7	6251.81
47	Tax1bp1	6192.47	-0.50139	0.0557513	-8.99333	2.39843e-19	7.64386e-17	4952.16	4530.93	4675.17	6826.21	7152.94	7069.87	6593.69	6518.81	7010.69	6245.47	6505.26	6228.5
48	Abcb4	229.271	-1.19201	0.132611	-8.98871	2.50153e-19	7.80633e-17	125.136	114.854	109.696	281.781	265.303	300.324	206.269	222.446	277.022	276.802	263.529	308.094
49	Evi2a	3660.34	0.306755	0.0341382	8.98567	2.57169e-19	7.8615e-17	4351	4327.04	4143.88	3526.07	3353.68	3484.37	3490.11	3295.96	3520.21	3510.44	3504.77	3416.51
50	Celf4	75.9719	-2.38951	0.266181	-8.97701	2.78232e-19	8.33528e-17	15.2192	13.3551	25.3774	96.4656	92.1903	121.049	97.9347	129.499	101.35	67.8258	76.4559	74.9418
51	Actn1	2541.93	0.510709	0.0569414	8.96902	2.99152e-19	8.78626e-17	3225.63	3252.4	3339.99	2358.33	2290.42	2353.56	2355.63	2318.45	2390.5	2032.02	2148.9	2437.27
52	Rpn1	10088	-0.24502	0.0274272	-8.93346	4.12879e-19	1.18933e-16	8684.25	8932.76	8959.85	10362.4	10597.8	10281.5	10426.1	10628.3	10598.5	10787	10644.5	10152.9
53	Iqsec1	2527.6	-0.492242	0.0552199	-8.91421	4.9129e-19	1.3885e-16	1953.98	1851.9	2002.36	2756.88	2508.6	2693.72	2820.17	2767.52	2976.98	2575.55	2654	2769.52
54	Sod2	2607.55	0.505264	0.0570291	8.85976	8.0186e-19	2.22427e-16	3238.31	3352.12	3460.33	2160.32	2334.46	2399.53	2197.9	2352.91	2441.85	2339.07	2408.36	2605.48
55	Rnf144b	985.993	0.772897	0.0884373	8.73949	2.34165e-18	6.37738e-16	1436.52	1540.28	1322.08	816.15	773.374	789.116	832.878	751.929	779.716	886.318	980.1	923.45
56	Fundc2	1810.31	-0.68389	0.0797632	-8.57401	9.99441e-18	2.67333e-15	1219.23	1318.59	1193.56	2129.86	2264.81	2160.49	1979.49	1915.33	1908.08	2043.02	1791.83	1799.44
57	Tmem123	4963.55	0.293032	0.0341896	8.5708	1.02771e-17	2.70073e-15	5910.97	5715.97	5647.7	4634.16	4488.64	4681.07	4604.66	4689.12	4756.68	4733.14	4919.21	4781.29
58	Setd5	3473.03	-0.417819	0.0488243	-8.5576	1.15238e-17	2.97612e-15	2821.47	2795.66	2705.56	3686	3630.25	3893.48	3640.92	3773.22	3539.13	3422.45	3887.05	3881.15
59	Dusp16	1934.22	-0.418376	0.0489952	-8.53911	1.35257e-17	3.43393e-15	1594.63	1550.08	1489.08	2072.74	2054.82	2166.62	2009.83	1905.93	1993.21	2129.18	2089.52	2154.99
60	Plcl2	1525.33	0.358204	0.0420803	8.51239	1.70387e-17	4.25371e-15	1770.5	1866.15	1840.27	1469.83	1469.92	1454.12	1358.08	1362.87	1428.35	1401.43	1450.22	1432.22
61	Ehbp1l1	4325.11	0.397759	0.0467456	8.50903	1.754e-17	4.30707e-15	5331.8	5300.18	5205.64	3896.7	3640.49	3986.95	4099.39	4021.78	4245.87	4068.63	3917.96	4185.92
62	Atp6v0a1	4035.12	0.264916	0.0313046	8.46254	2.6161e-17	6.32041e-15	4673.99	4700.98	4474.61	3986.82	3801.31	3815.34	3828.12	3837.97	3760.75	3750.58	3877.29	3913.63
63	Daglb	981.707	0.478681	0.0573999	8.33941	7.46635e-17	1.77521e-14	1224.3	1217.09	1294.25	894.845	850.199	861.132	961.146	929.468	939.173	878.069	820.681	910.127
64	Mcfd2	720.304	0.499112	0.0611229	8.16571	3.19554e-16	7.47907e-14	924.99	908.144	930.777	621.949	664.794	671.132	650.875	704.934	698.637	660.843	595.38	611.192
65	Cyfip2	750.312	-0.511425	0.0629439	-8.1251	4.46982e-16	1.03005e-13	587.631	592.965	527.195	746.339	793.861	807.503	818.144	823.989	858.093	768.081	858.909	821.029
66	Zfp618	175.366	-3.00062	0.374315	-8.01631	1.0897e-15	2.47312e-13	22.8288	31.1618	30.2891	190.393	195.648	231.372	118.735	124.277	116.214	320.797	354.625	368.048
67	Loxl3	789.112	-0.66492	0.0833551	-7.97696	1.49984e-15	3.35316e-13	541.973	569.816	537.018	844.074	823.566	710.971	925.612	864.719	849.985	943.145	915.031	943.434
68	Tulp4	2517.12	0.502272	0.0630697	7.96375	1.66899e-15	3.67645e-13	3334.7	3145.56	3202.46	2285.98	2158.28	2352.03	2421.5	2333.07	2516.17	2034.77	2162.73	2258.25
69	Dpp9	2151.65	0.27526	0.0348192	7.9054	2.67067e-15	5.79769e-13	2488.34	2429.73	2504.99	2029.58	1997.46	2071.62	2060.09	2041.7	2017.53	1975.2	2098.47	2105.03
70	Dctn1	3768.57	-0.403666	0.0511269	-7.89538	2.89426e-15	6.10606e-13	2971.13	3139.33	2992.08	3943.67	4013.35	3887.35	4342.06	4174.25	4172.9	3710.25	3989.54	3886.98
71	Clmn	234.183	1.28767	0.163085	7.89566	2.88774e-15	6.10606e-13	446.43	407.775	405.22	168.815	146.48	180.807	234.003	210.958	191.889	132.902	134.205	150.716
72	B3gnt2	2428.07	-0.328077	0.0416177	-7.8831	3.19347e-15	6.64375e-13	2042.76	2045.11	2023.64	2575.38	2617.18	2528.24	2427.57	2443.77	2694.55	2653.45	2522.23	2563.01
73	Slc37a3	935.64	-0.539312	0.0688235	-7.83616	4.64523e-15	9.53163e-13	710.23	722.064	662.268	938.001	941.365	1000.57	1072.95	1061.06	1133.76	1036.63	968.713	980.072
74	Ccdc69	121.449	-1.18677	0.152587	-7.77762	7.38997e-15	1.49587e-12	71.8685	65.885	49.1175	132.006	128.042	113.388	153.402	158.741	162.159	138.401	156.979	127.401
75	Sh3tc2	155.61	-1.01711	0.131044	-7.76165	8.38319e-15	1.67429e-12	97.2338	64.1043	101.51	182.777	196.673	179.275	162.069	163.962	193.24	173.231	167.552	185.689
76	Cdc42bpa	139.706	1.22419	0.158047	7.74571	9.50468e-15	1.8733e-12	257.036	231.488	243.132	119.313	102.434	98.0649	107.468	139.942	125.674	74.2417	91.9098	85.7667
77	Hacd1	204.272	1.25189	0.162159	7.7201	1.16238e-14	2.26121e-12	335.668	367.709	384.754	123.121	132.139	139.436	131.735	130.543	133.781	186.063	212.287	174.032
78	Erc1	1157.59	-0.354975	0.0460595	-7.70688	1.28926e-14	2.47588e-12	958.81	947.319	965.159	1194.4	1184.13	1238.07	1199.48	1221.89	1270.25	1186.95	1228.18	1296.49
79	Prim2	1407	-0.373406	0.0484619	-7.70514	1.30696e-14	2.4781e-12	1158.35	1135.18	1160.81	1532.03	1503.73	1598.15	1455.15	1453.73	1367.54	1494	1532.37	1493.01
80	Aak1	3071.82	-0.433664	0.0563196	-7.70005	1.36009e-14	2.5466e-12	2569.51	2421.72	2306.07	3221.44	3026.91	3283.64	3413.85	3346.09	3394.54	3041.16	3375.45	3461.48
81	Cdca3	1906.21	-0.475643	0.0618543	-7.68973	1.47441e-14	2.72657e-12	1383.26	1545.63	1498.08	1987.7	1997.46	1968.96	2026.29	1928.91	1983.75	2108.1	2282.29	2164.15
82	Ccdc88b	1513.67	-0.455068	0.0593144	-7.67214	1.69151e-14	3.08989e-12	1180.33	1183.26	1188.64	1617.07	1591.82	1598.15	1756.76	1762.86	1663.48	1475.67	1573.85	1572.11
83	Phf3	4326.07	-0.318248	0.0415512	-7.65918	1.87121e-14	3.37697e-12	3833.55	3553.34	3565.11	4417.11	4567.52	4540.1	4576.06	4519.93	4644.51	4294.1	4782.56	4618.91
84	Arpc5	19807.8	0.265702	0.0347176	7.65324	1.95977e-14	3.41342e-12	22780.6	22987.6	22230.6	19618.1	19081.3	19309.6	18104	17939.8	18547	19097.5	18722.8	19274.2
85	Zfp746	855.484	-0.363929	0.0475414	-7.655	1.93314e-14	3.41342e-12	688.246	705.147	718.753	899.922	936.243	917.826	922.146	874.118	893.228	891.817	920.725	897.636
86	Evi2	5043.98	0.319464	0.0417393	7.6538	1.95124e-14	3.41342e-12	6144.33	5936.77	5700.91	4872.78	4728.34	4799.05	4864.67	4730.89	4601.27	4449.92	4988.34	4710.51
87	Itga8	250.999	-1.88998	0.247223	-7.64483	2.09218e-14	3.60216e-12	83.7056	79.24	85.9557	204.355	209.989	174.678	376.138	392.674	390.534	309.799	366.012	338.903
88	Gstm1	595.611	-0.630928	0.0827756	-7.62214	2.49498e-14	4.15248e-12	405.846	391.749	468.254	643.527	594.115	686.454	659.542	641.229	622.962	634.262	645.809	753.581
89	Phc1	300.088	-0.652913	0.0856576	-7.62236	2.49081e-14	4.15248e-12	211.378	211.9	207.931	326.206	310.374	280.404	325.004	327.925	368.913	343.712	335.918	351.394
90	Pros1	17.8479	2.2784	0.298856	7.62375	2.46403e-14	4.15248e-12	35.5115	44.5169	50.7548	10.1543	13.3164	10.7258	8.66678	6.26608	14.8646	4.58282	7.32025	7.49418
91	Cebpz	2800.08	0.384117	0.0504434	7.61481	2.64074e-14	4.34678e-12	3478.43	3377.05	3330.99	2698.5	2706.3	2638.56	2465.7	2424.97	2510.77	2520.55	2662.94	2786.17
92	Dmpk	1478.45	1.36888	0.180965	7.56437	3.89743e-14	6.34561e-12	2738.61	2647.86	2825.89	971.002	812.299	715.567	1055.61	987.952	918.903	1373.93	1329.03	1364.77
93	Zc3hav1l	327.608	-1.1875	0.157137	-7.55713	4.12076e-14	6.63708e-12	179.248	154.919	167	403.632	385.15	372.34	439.406	482.488	431.074	283.218	316.397	316.421
94	Tbl3	1432.6	0.317902	0.0420969	7.55167	4.29702e-14	6.84735e-12	1634.37	1743.28	1670	1354.33	1357.25	1363.72	1296.55	1354.52	1309.44	1356.52	1332.29	1418.9
95	Ifit2	456.906	-0.943646	0.125233	-7.53515	4.87784e-14	7.69108e-12	257.036	268.882	282.426	610.526	635.088	573.067	502.673	490.843	513.505	418.87	461.989	467.97
96	Atp6v1b2	9294.58	0.31776	0.0421814	7.53317	4.95212e-14	7.72686e-12	10897.8	10567.4	11264.3	8883.72	8867.68	9104.71	8828.85	8687.92	9071.47	8106.09	8405.27	8849.79
97	Iffo1	521.855	-0.625193	0.0830246	-7.53021	5.06579e-14	7.82273e-12	383.862	355.245	374.112	535.638	500.9	557.744	645.675	628.697	595.936	555.438	565.286	563.729
98	Arfgef1	4711.94	-0.320002	0.0425948	-7.51269	5.79246e-14	8.79785e-12	4185.28	3893.45	3836.9	4835.97	4932.18	4943.08	4994.67	5049.42	5147.21	4773.47	4755.72	5195.96
99	Wdr4	587.954	0.504331	0.067135	7.51219	5.81472e-14	8.79785e-12	746.587	751.445	767.052	525.484	499.876	514.841	559.874	601.544	535.126	532.524	481.51	539.581
100	Raph1	3787.09	-0.929207	0.123737	-7.50955	5.93296e-14	8.88698e-12	2424.08	2265.02	2082.58	3595.88	3372.11	3677.43	4698.26	4366.41	4589.11	4481.08	4874.47	5018.6
101	Eml4	1582.81	0.383952	0.0513824	7.47245	7.87156e-14	1.16741e-11	2022.46	1910.66	1829.63	1406.37	1526.26	1345.33	1498.49	1499.68	1512.14	1426.17	1519.36	1497.17
102	Nudt7	70.9484	-1.56491	0.209606	-7.46593	8.27108e-14	1.21463e-11	28.7474	28.4908	29.4705	55.8485	98.3363	84.2745	72.801	91.9025	70.2691	103.572	91.9098	95.759
103	Myo18a	1988.41	-0.364755	0.0488943	-7.46007	8.64769e-14	1.25761e-11	1573.5	1706.78	1624.97	2093.05	2133.69	2152.83	2210.03	2059.45	2186.45	1954.11	2026.9	2139.17
104	Atp7a	3282.65	0.374947	0.0503033	7.45373	9.07396e-14	1.30691e-11	4164.99	4038.57	3687.09	3131.32	3122.18	3085.98	2976.17	2907.46	2943.19	2948.59	3174.55	3211.67
105	Usp5	4009.46	-0.368532	0.0497452	-7.4084	1.27831e-13	1.82359e-11	3238.31	3288.02	3341.63	4328.26	4163.93	4460.42	4460.79	4284.95	4468.84	4103.46	3915.52	4059.35
106	Samhd1	5194.23	0.504935	0.0682661	7.39656	1.39753e-13	1.97486e-11	6851.18	6528.85	6639.87	4733.16	4761.11	4454.29	4275.32	4302.71	4567.49	4836.71	5264.89	5115.19
107	Actr3	33218.5	0.223294	0.0302451	7.38279	1.55005e-13	2.16993e-11	37701.4	37140.4	36829.1	32097.7	32466.3	31567.7	30997.6	30879.2	30860.3	32822.2	32584.9	32675.5
108	Pdcl3	2254.54	-0.266683	0.036137	-7.37978	1.58549e-13	2.19899e-11	1918.47	1973.88	1980.25	2364.68	2342.66	2290.73	2371.23	2310.09	2339.15	2483.89	2357.12	2322.36
109	Casp8	1917.21	-0.679636	0.0926726	-7.33373	2.23831e-13	3.07593e-11	1329.14	1360.44	1271.33	2335.48	2158.28	2266.22	2284.56	2182.68	2249.96	1724.06	1900.82	1943.49
110	Odf2	2533.68	-0.421163	0.0574404	-7.33218	2.26447e-13	3.08359e-11	2074.89	2058.46	1925.41	2772.12	2787.22	2874.53	2573.17	2706.95	2625.63	2490.3	2915.9	2599.65
111	Zfp239	283.06	-0.819517	0.112018	-7.31592	2.55633e-13	3.44967e-11	180.939	179.848	179.279	258.934	276.571	309.517	305.937	346.723	363.507	307.049	324.531	363.884
112	Cct7	10442.8	-0.290261	0.0397144	-7.3087	2.6973e-13	3.6074e-11	8700.31	8862.42	9279.94	10848.6	11239	11135	10469.5	10420.5	10621.4	11279.2	11153.6	11304.6
113	Mgst1	110.218	-1.27745	0.174946	-7.302	2.83521e-13	3.75829e-11	37.2025	58.7623	63.8528	144.698	156.723	122.581	104.001	109.656	127.025	125.569	129.324	143.222
114	Panx1	328.294	-0.871223	0.119606	-7.28412	3.23769e-13	4.21716e-11	184.322	207.449	213.661	388.401	447.635	422.905	352.738	367.61	385.129	322.631	313.144	333.907
115	Msh2	1576.53	0.312217	0.0428593	7.28468	3.22434e-13	4.21716e-11	1849.98	1865.26	1822.26	1473.64	1522.16	1553.72	1424.82	1411.96	1449.98	1488.5	1499.02	1557.12
116	Sec61a1	6002.66	-0.260511	0.0358109	-7.27464	3.47344e-13	4.48522e-11	5189.75	5170.19	5316.15	6285.49	6461.51	6308.33	6448.95	6131.36	6485.02	6047.49	6218.96	5968.7
117	Pcmtd1	908.11	-0.521735	0.0717498	-7.27159	3.55284e-13	4.54855e-11	718.685	681.108	650.807	1050.97	965.949	1014.36	1042.61	962.887	1072.95	878.985	934.552	923.45
118	Gm44597	933.669	-0.399525	0.0549796	-7.26678	3.68161e-13	4.67346e-11	770.261	741.651	745.768	1039.54	1002.83	1012.83	1036.55	971.242	998.632	1023.8	916.658	944.267
119	Kif3a	1093.82	-0.480811	0.0662861	-7.25357	4.05918e-13	5.10945e-11	865.804	842.259	819.444	1204.55	1200.52	1192.1	1211.62	1199.95	1298.63	1161.29	1063.06	1066.67
120	Hck	344.773	0.719529	0.0992464	7.24993	4.17002e-13	5.20523e-11	478.56	484.344	501.817	309.705	270.425	278.872	344.938	335.235	328.373	273.136	254.582	277.285
121	Hnrnpf	10369.8	-0.261107	0.0360703	-7.23885	4.52496e-13	5.6016e-11	9035.14	9061.86	8980.32	10799.1	11401.9	11121.2	11074.4	10677.4	10732.2	10181.2	10708.7	10664.2
122	Eif4e3	1235.4	-0.443646	0.061334	-7.23328	4.71466e-13	5.7886e-11	1017.15	1006.08	893.12	1306.09	1322.42	1352.99	1381.49	1347.21	1431.06	1242.86	1242	1282.34
123	Mrps18b	825.965	0.40037	0.0555365	7.20912	5.63136e-13	6.8579e-11	1021.38	1011.42	991.355	812.342	796.934	773.793	707.21	762.373	795.932	708.504	776.76	753.581
124	Marco	76.905	1.10445	0.153335	7.20285	5.89678e-13	7.12322e-11	131.054	107.731	145.715	68.5413	44.0465	67.4196	66.7342	65.7938	52.7018	52.2442	64.2555	56.6227
125	Dlx4	69.0164	-1.62907	0.226394	-7.19573	6.21278e-13	7.40689e-11	16.9102	31.1618	32.745	64.7335	101.409	79.6777	63.2675	78.326	81.0797	98.0724	100.043	80.7706
126	Lipo3	339.159	-1.06315	0.147756	-7.19534	6.23051e-13	7.40689e-11	192.777	190.532	175.186	437.903	408.71	424.437	409.939	409.384	482.424	329.963	317.211	291.44
127	Ankrd12	482.037	0.742228	0.103262	7.18781	6.58373e-13	7.76517e-11	739.823	673.986	660.631	397.286	354.42	395.324	411.672	379.098	379.723	421.62	457.922	512.935
128	Rtkn	79.9321	-1.38798	0.193173	-7.18514	6.71387e-13	7.8568e-11	31.2839	35.6135	40.9313	85.042	92.1903	113.388	114.402	112.789	93.2416	88.9067	76.4559	74.9418
129	Pcbp1	9066.54	-0.258344	0.0361618	-7.1441	9.05873e-13	1.05187e-10	7897.92	7822.51	7986.51	9682.1	9588.81	10007.2	9212.79	8961.54	9264.71	9457.11	9591.97	9325.26
130	Wnk1	18773	-0.376952	0.0528003	-7.1392	9.38778e-13	1.08169e-10	15985.2	15313.8	14718.1	19129.4	19008.6	19375.5	19996.9	20159	20357.8	18600.8	21022.9	21608.2
131	Cdkn1b	1766.48	-0.50968	0.0714716	-7.13123	9.94747e-13	1.13743e-10	1418.77	1326.6	1277.87	1844.27	1746.49	1759.04	1933.56	2045.87	1935.1	2174.09	1864.22	1871.88
132	Cflar	3193.77	-0.48398	0.0679366	-7.12399	1.04843e-12	1.18079e-10	2541.61	2357.61	2474.7	3375.03	3334.21	3381.71	3595.85	3709.52	3860.74	3142.9	3163.16	3388.2
133	Elavl4	116.134	0.910499	0.127804	7.12419	1.04692e-12	1.18079e-10	203.768	175.396	157.995	100.273	82.9712	99.5972	115.268	100.257	86.485	80.6577	94.3499	96.5917
134	Snord47	27.9305	1.82296	0.256559	7.10544	1.19942e-12	1.33572e-10	72.714	55.2009	55.6665	13.9621	12.292	9.19358	16.4669	13.5765	17.5673	18.3313	25.2142	24.9806
135	Rpl7l1	4150.15	0.30153	0.0424395	7.10493	1.20383e-12	1.33572e-10	4808.42	4749.95	4937.13	4093.44	4008.23	4023.73	3685.98	3689.68	4044.53	3863.32	3916.33	3981.08
136	Mcm2	8359.58	-0.354319	0.04993	-7.09632	1.28125e-12	1.39071e-10	6744.65	6981.14	7017.26	9009.38	9524.28	9110.84	8991.79	8853.97	9026.87	8357.23	8563.88	8133.68
137	P4ha2	817.269	-0.893031	0.125843	-7.09637	1.28075e-12	1.39071e-10	485.324	502.15	506.729	772.994	781.569	761.535	975.88	846.965	979.713	1094.38	1018.33	1081.66
138	Cysltr1	924.475	0.576582	0.0812424	7.09705	1.27444e-12	1.39071e-10	1192.17	1342.63	1150.99	870.729	771.325	784.519	786.077	755.062	801.338	967.892	850.776	820.196
139	Rnf103	1446.63	-0.308868	0.0438138	-7.04956	1.7949e-12	1.92041e-10	1209.08	1254.49	1218.93	1466.02	1497.58	1477.1	1586.02	1508.04	1586.46	1547.16	1463.24	1545.47
140	Tmc8	277.201	-0.552007	0.0783018	-7.04973	1.79263e-12	1.92041e-10	209.687	206.558	199.745	309.705	287.838	288.066	310.271	302.86	321.616	296.967	305.824	287.277
141	Col27a1	81.2175	-1.66547	0.236832	-7.03231	2.03143e-12	2.15807e-10	29.5929	34.7232	27.8333	116.774	96.2876	127.178	112.668	110.701	99.9983	87.0736	61.0021	70.7784
142	Ppfibp1	3155.14	-0.308032	0.0438543	-7.02398	2.15635e-12	2.27465e-10	2742.84	2609.58	2676.9	3297.6	3273.78	3473.64	3135.64	3234.34	3332.38	3179.56	3434.82	3470.64
143	Brk1	3183.94	-0.243515	0.0347024	-7.01724	2.26295e-12	2.35911e-10	2756.37	2776.96	2861.91	3375.03	3384.41	3306.63	3294.24	3219.72	3195.89	3440.78	3346.17	3249.14
144	Hoxc4	294.137	-0.72203	0.102898	-7.01693	2.26792e-12	2.35911e-10	217.296	196.765	177.642	368.092	318.569	335.566	331.938	324.792	364.859	282.302	323.718	288.11
145	Mical1	387.366	-1.1228	0.160663	-6.98856	2.7773e-12	2.86904e-10	213.914	219.913	184.191	394.747	430.221	419.84	360.538	365.521	416.209	618.681	508.351	516.266
146	Gm14295	38.8104	-5.92628	0.849197	-6.97869	2.97954e-12	3.05688e-10	0	1.78068	0.818625	62.1949	62.4845	42.9034	52.0007	54.306	36.4859	43.9951	48.8017	59.9534
147	Ccr5	58.7691	-3.14466	0.450856	-6.97485	3.06193e-12	3.12005e-10	8.45512	8.90338	8.18625	93.927	87.0686	76.6132	120.468	96.0799	98.647	39.4123	34.1612	33.3075
148	Plxnd1	6937.41	-0.697138	0.100382	-6.94486	3.78841e-12	3.83423e-10	4675.68	4675.16	4847.9	7100.37	6664.33	7367.13	7276.63	6904.17	7417.44	8404.89	8449.19	9465.98
149	Raf1	3014.29	-0.458227	0.0659926	-6.94361	3.82199e-12	3.84225e-10	2347.99	2320.22	2391.2	3490.53	3328.07	3260.66	3421.65	3356.53	3375.62	2917.42	2928.1	3033.48
150	Bmpr1a	3026.59	0.577791	0.0833429	6.93269	4.12901e-12	4.10741e-10	4235.17	3818.66	4014.54	2603.3	2352.9	2664.61	2639.04	2408.26	2778.33	2798.27	2843.51	3162.54
151	Usp11	24.4927	-3.4727	0.500945	-6.9323	4.14059e-12	4.10741e-10	2.53653	2.67101	3.2745	44.4249	43.0221	33.7098	25.1337	27.153	27.0266	25.6638	27.6543	31.6421
152	Heatr5a	1571.09	0.492006	0.0713307	6.89755	5.29089e-12	5.21396e-10	2044.45	1935.59	2040.01	1325.13	1323.44	1291.7	1599.89	1515.35	1540.51	1368.43	1404.67	1463.86
153	Pms1	519.794	-0.471402	0.0683602	-6.89585	5.35437e-12	5.24204e-10	402.464	386.406	419.136	590.217	612.553	568.47	519.14	532.617	527.018	556.354	566.913	556.235
154	Wdr1	11836	0.271123	0.0393398	6.89181	5.50858e-12	5.35798e-10	13972.9	13363.1	13402.5	11262.4	11193.9	11167.1	11587.5	11336.4	12020.1	10591.8	11016.2	11118
155	Msh6	3309.55	0.368729	0.0536282	6.87565	6.17058e-12	5.96317e-10	4047.46	4004.74	3901.57	3015.82	3025.89	3105.9	2872.17	3006.67	2970.22	3066.82	3363.25	3334.08
156	Ing4	936.694	-0.381631	0.0556228	-6.86105	6.83539e-12	6.56329e-10	779.562	755.006	753.135	1037	1002.83	1012.83	1042.61	967.065	1002.69	1027.47	915.031	945.099
157	Vgll4	988.321	-0.594472	0.0868907	-6.84161	7.83102e-12	7.47139e-10	686.555	712.27	744.949	1110.62	1118.58	1025.08	1253.22	1062.1	1185.11	1030.22	940.245	990.897
158	Cnot11	1436.84	-0.347645	0.050869	-6.83413	8.25035e-12	7.82165e-10	1200.63	1177.03	1200.92	1617.07	1609.23	1398.96	1514.95	1495.5	1579.7	1477.5	1490.89	1479.68
159	Herc6	521.324	-0.486891	0.0712738	-6.83127	8.41678e-12	7.87968e-10	406.691	389.078	402.764	582.601	588.993	628.228	552.074	577.524	548.639	527.941	539.258	512.102
160	Pcyox1l	212.013	-0.682227	0.0998646	-6.83152	8.40167e-12	7.87968e-10	137.818	163.822	135.073	256.395	232.524	240.565	238.337	225.579	249.996	228.224	231.808	204.008
161	Gm45234	2164.05	-0.504987	0.0740242	-6.82191	8.98349e-12	8.31927e-10	1663.12	1635.55	1643.8	2217.44	2023.06	2120.65	2506.43	2413.48	2390.5	2321.66	2550.7	2482.24
162	Fkbp4	6340.21	-0.320285	0.046951	-6.82169	8.99741e-12	8.31927e-10	5281.91	5250.32	5493.79	6700.55	7015.68	6893.66	6728.02	6684.86	7032.31	6329.79	6454.83	6216.84
163	Lmo2	2262.74	0.568025	0.0833243	6.81703	9.29394e-12	8.54073e-10	2952.53	3162.48	2868.46	1865.85	1915.51	1786.62	2333.1	2122.11	2140.5	2191.51	1939.05	1875.21
164	Ndufs1	3835.86	-0.288205	0.0422903	-6.81492	9.43185e-12	8.61462e-10	3238.31	3280.89	3349.81	4109.94	4164.95	4207.6	3841.12	3962.25	3756.69	4082.38	4096.9	3939.44
165	Cers6	863.098	0.736789	0.108275	6.80479	1.01195e-11	9.18663e-10	1284.33	1168.12	1246.77	634.642	586.945	709.438	760.077	752.974	889.174	724.086	762.933	837.683
166	Kdm5a	2675.54	-0.335748	0.0493602	-6.80198	1.03189e-11	9.31126e-10	2349.68	2236.53	2125.97	2737.85	2743.17	2820.9	2848.77	2776.92	2710.76	2778.11	2911.83	3065.95
167	Six1	93.7901	-1.22263	0.179826	-6.79898	1.0536e-11	9.45021e-10	47.3486	49.8589	43.3871	126.928	139.31	125.646	97.9347	89.8138	81.0797	102.655	104.11	117.409
168	Cmtm4	1932.44	0.408549	0.0601181	6.79577	1.07738e-11	9.60596e-10	2433.38	2398.57	2286.42	1679.26	1635.86	1736.06	1757.62	1820.3	1744.56	1834.96	1880.49	1981.79
169	C2cd5	882.475	-0.498739	0.0734588	-6.78937	1.12627e-11	9.98245e-10	706.848	693.573	623.793	878.344	873.759	946.939	929.079	982.73	906.741	965.142	1042.73	1040.03
170	Bmp2	163.898	-1.14767	0.169179	-6.78376	1.17089e-11	1.03169e-09	95.5428	85.4724	75.3135	247.51	225.354	199.194	193.269	172.317	202.699	152.15	145.592	172.366
171	Nacc2	931.124	0.713353	0.105204	6.78067	1.19618e-11	1.04782e-09	1357.05	1282.09	1313.89	658.758	696.549	672.664	843.278	833.388	868.904	863.403	880.057	903.465
172	Zcchc24	367.833	-1.15759	0.170867	-6.77483	1.24556e-11	1.08472e-09	186.013	202.997	185.828	313.513	346.226	315.646	513.94	507.552	487.829	392.289	473.376	488.787
173	I830077J02Rik	181.081	-0.747183	0.110426	-6.76639	1.3204e-11	1.14325e-09	122.599	127.318	108.877	218.317	179.259	226.775	188.069	194.248	210.807	213.559	205.78	177.362
174	Mbd4	445.958	-0.45103	0.066673	-6.76481	1.33483e-11	1.1491e-09	375.407	341.89	331.543	458.211	502.949	476.534	468.873	493.976	490.532	459.199	464.429	487.954
175	Bard1	1086.94	-0.572533	0.084651	-6.76344	1.34749e-11	1.15337e-09	810.846	824.453	752.317	1256.59	1269.15	1189.04	1209.02	1312.74	1155.39	966.975	1147.65	1149.11
176	Rnf157	890.175	-0.432623	0.0640815	-6.75115	1.46681e-11	1.24838e-09	698.393	722.954	695.832	965.925	887.075	974.52	925.612	881.428	921.606	947.727	1045.98	1015.05
177	Ncs1	54.1469	-4.05339	0.600707	-6.74769	1.50216e-11	1.27124e-09	5.91858	3.56135	3.2745	67.272	71.7035	67.4196	113.535	123.233	114.863	23.8307	26.8409	28.3113
178	Itpr2	1415.41	-0.527015	0.0782899	-6.73158	1.67825e-11	1.41228e-09	1091.56	1026.56	1075.67	1463.48	1450.46	1403.55	1487.22	1501.77	1501.33	1508.66	1651.12	1823.58
179	Ankrd44	1871.48	-0.602219	0.0895367	-6.72595	1.74455e-11	1.45175e-09	1483.87	1325.71	1236.12	1807.46	1867.36	1791.22	2228.23	2189.99	2175.64	2059.52	2061.87	2230.77
180	Aldh5a1	97.7157	-1.24451	0.185025	-6.72615	1.74208e-11	1.45175e-09	45.6576	50.7492	47.4803	144.698	132.139	140.968	87.5345	107.568	95.9443	107.238	93.5365	119.074
181	Ccl2	3128.01	0.788495	0.117371	6.71796	1.84292e-11	1.52514e-09	4552.23	4888.84	4275.68	3001.86	3088.37	2519.04	2639.9	2671.44	2022.94	2786.36	2872.79	2216.61
182	Wdr46	1368.9	0.313697	0.0468325	6.69827	2.10896e-11	1.73572e-09	1627.61	1561.65	1629.88	1298.48	1292.71	1190.57	1315.62	1257.39	1251.33	1295.11	1358.31	1348.12
183	Rrbp1	10475.7	0.260175	0.0388845	6.69097	2.217e-11	1.81467e-09	12400.3	11793.4	11674.4	9591.98	9912.5	9909.15	10283.1	10323.4	10112	9419.53	10315.9	9972.26
184	Ccdc91	262.397	-1.12676	0.168714	-6.67852	2.41372e-11	1.96495e-09	149.656	123.757	142.441	308.436	352.372	366.211	357.938	304.949	321.616	279.552	223.674	218.164
185	Atn1	1706.7	-0.493804	0.0740278	-6.67053	2.54888e-11	2.06376e-09	1356.2	1282.09	1282.79	1808.73	1648.16	1752.91	1976.89	1941.44	1933.75	1630.57	2000.87	1866.05
186	Ube2w	1272.44	-0.628488	0.0943548	-6.6609	2.72155e-11	2.19172e-09	912.307	958.003	836.635	1412.71	1622.55	1461.78	1441.29	1457.91	1443.22	1321.69	1170.43	1230.71
187	Sh3bp5	1017.37	0.503826	0.0756559	6.65944	2.74866e-11	2.20172e-09	1307.16	1272.29	1344.18	835.189	857.369	786.052	972.413	944.089	978.362	936.729	967.9	1006.72
188	Serbp1	22172.8	-0.38558	0.0581071	-6.63568	3.23005e-11	2.57356e-09	18065.2	17783.6	18236.5	24286.5	25760	25153.6	22986.9	23010.1	23587.4	22019.5	23854.3	21330.1
189	Rab11fip5	1248.45	-0.43997	0.0663477	-6.63129	3.32776e-11	2.63738e-09	940.209	1006.97	1009.37	1312.44	1210.77	1264.12	1358.95	1237.55	1433.76	1447.25	1383.53	1376.43
190	Nudt3	2300.73	0.31396	0.0474065	6.62272	3.52651e-11	2.78019e-09	2667.59	2719.09	2703.92	2261.86	2135.74	2155.9	2119.9	2080.34	2060.78	2353.74	2244.06	2105.86
191	Mkks	712.833	0.463713	0.0701503	6.61028	3.83597e-11	2.99266e-09	894.551	849.382	951.243	685.413	675.038	612.906	630.075	607.81	621.611	742.417	649.875	633.675
192	Fancd2	1628.04	-0.474722	0.0718142	-6.61042	3.83234e-11	2.99266e-09	1266.58	1258.94	1250.86	1799.84	1882.73	1892.35	1779.29	1866.25	1763.48	1548.99	1589.31	1637.89
193	Myd88	1541	0.31923	0.0483403	6.60381	4.00719e-11	3.11003e-09	1853.36	1696.09	1880.38	1452.06	1428.95	1417.34	1428.29	1419.27	1544.57	1411.51	1438.02	1522.15
194	Bin2	1350.39	-0.343173	0.0521384	-6.58196	4.64271e-11	3.5847e-09	1155.81	1107.58	1110.87	1388.6	1363.39	1323.88	1505.42	1480.88	1501.33	1374.85	1431.52	1460.53
195	Magohb	164.372	-1.13699	0.172867	-6.57724	4.79252e-11	3.68139e-09	83.7056	76.569	99.8723	186.585	176.186	174.678	144.735	172.317	160.808	234.64	235.875	226.491
196	Gm20696	347.066	-0.530657	0.0808876	-6.56043	5.36535e-11	4.10038e-09	262.954	267.101	251.318	363.015	327.788	375.405	416.006	375.965	394.588	384.04	363.572	383.036
197	Naglu	1417.48	-0.43874	0.0668935	-6.55879	5.42479e-11	4.11777e-09	1078.03	1158.33	1123.97	1462.22	1434.07	1406.62	1654.49	1467.31	1528.35	1697.48	1457.54	1541.3
198	Sft2d1	710.53	0.4338	0.0661453	6.55828	5.44307e-11	4.11777e-09	864.958	869.86	911.949	657.489	645.332	620.567	676.876	634.963	687.826	734.168	596.194	626.18
199	Plekhm3	4032.69	-0.290914	0.044381	-6.55492	5.56725e-11	4.19055e-09	3557.91	3409.1	3394.84	4241.95	4059.44	4213.73	4291.79	4111.59	4352.63	4064.96	4123.74	4570.62
200	Creb5	611.933	-0.715276	0.109152	-6.55302	5.63845e-11	4.22292e-09	401.618	438.936	400.308	628.296	603.334	655.809	595.408	627.652	668.907	723.169	763.746	836.017
201	Nup210	2802.61	-0.361241	0.055133	-6.55218	5.67034e-11	4.22568e-09	2292.18	2361.18	2279.05	2971.39	3058.67	2808.64	2981.37	3214.5	2810.76	2726.78	3122.49	3004.33
202	Sf3b1	15288.2	-0.23291	0.0356125	-6.54011	6.14716e-11	4.55834e-09	14186.8	13222.4	13128.3	15938.4	16252.1	15823.7	15662.6	15929.4	15936.2	15019.7	16186.7	16171.6
203	Zfp777	518.545	-0.524533	0.0802118	-6.53935	6.17873e-11	4.55917e-09	381.326	407.775	382.298	574.986	529.582	524.034	622.275	629.741	566.206	516.026	562.032	526.258
204	Glce	813.74	0.386307	0.0591158	6.53475	6.37159e-11	4.67844e-09	963.883	1009.64	988.899	699.375	726.254	802.906	773.077	784.304	778.365	686.507	790.587	761.076
205	Il1rn	439.114	0.763515	0.116952	6.52847	6.64427e-11	4.85486e-09	671.336	569.816	658.175	398.555	341.104	468.873	318.938	312.26	420.263	381.291	344.052	384.701
206	Oas3	1044.14	-0.637935	0.0978601	-6.51885	7.08498e-11	5.15175e-09	715.303	736.309	757.228	1289.59	1221.01	1317.75	963.746	1019.28	1049.98	1081.55	1166.36	1211.56
207	Dkc1	7669.59	-0.247067	0.0379266	-6.51435	7.30067e-11	5.28293e-09	6857.94	6653.49	6666.07	7972.37	8393.41	8056.64	7977.77	7976.72	8117.43	8186.75	7574.83	7601.6
208	Phf11b	306.749	-0.826539	0.126955	-6.51047	7.49176e-11	5.39514e-09	174.175	226.146	182.553	337.63	396.418	376.937	292.937	297.639	298.644	398.705	361.132	338.071
209	Tmem237	480.384	-0.568193	0.0873409	-6.50547	7.74508e-11	5.55089e-09	352.578	367.709	340.548	463.289	478.365	507.179	531.274	501.286	499.991	592.1	546.579	583.713
210	Ttc27	1259.8	0.356832	0.054875	6.50264	7.89242e-11	5.62955e-09	1531.22	1442.35	1548.84	1209.63	1257.88	1222.75	1139.68	1098.65	1082.41	1207.12	1201.33	1175.75
211	Tia1	1183.77	-0.446867	0.0687687	-6.49811	8.13336e-11	5.77392e-09	982.484	925.061	887.39	1188.05	1235.35	1239.6	1301.75	1371.23	1117.55	1266.69	1343.67	1346.45
212	9330182L06Rik	115.571	-1.00704	0.155023	-6.49605	8.2456e-11	5.82599e-09	70.1775	61.4333	64.6714	145.968	142.383	160.888	130.868	128.455	127.025	93.4895	139.085	122.405
213	Kansl1l	294.029	-0.558608	0.086043	-6.49219	8.4598e-11	5.92147e-09	230.825	223.475	198.107	310.975	324.715	292.662	342.338	328.969	333.778	296.05	303.384	343.067
214	Adck2	244.982	-0.663664	0.102218	-6.49264	8.43471e-11	5.92147e-09	158.111	163.822	188.284	272.896	224.33	291.13	271.27	272.574	279.725	244.723	278.983	293.938
215	Hebp2	26.9532	-4.36203	0.672994	-6.48153	9.08001e-11	6.32602e-09	3.38205	0.890338	0.818625	54.5792	48.1438	49.0325	32.0671	39.6852	29.7292	25.6638	21.9607	17.4864
216	Tnf	2295.85	1.33838	0.207317	6.45571	1.07713e-10	7.46959e-09	4955.54	4083.09	3565.93	1440.64	1292.71	1201.3	1622.42	1535.19	1295.92	2541.63	2144.83	1871.05
217	Wbp11	3635.95	-0.412657	0.0641683	-6.43085	1.26889e-10	8.75882e-09	3032	2834.83	2867.64	4061.71	4078.91	4028.32	3965.05	3965.38	4014.8	3354.63	3795.14	3633.01
218	Bcl2l13	2130.9	-0.322244	0.0501263	-6.42864	1.28752e-10	8.84667e-09	1844.06	1740.61	1794.43	2195.86	2203.35	2304.53	2305.36	2252.66	2402.66	2068.69	2153.78	2304.88
219	Slc39a7	3093.43	0.314407	0.0489753	6.4197	1.3654e-10	9.33898e-09	3507.18	3598.74	3776.32	2906.66	2818.97	2802.51	2879.97	2786.32	2872.92	3194.23	3001.3	2976.02
220	Ndufb3	879.791	-0.413805	0.0644949	-6.41609	1.39819e-10	9.51979e-09	651.889	718.502	744.949	913.884	942.389	881.052	923.012	904.404	924.308	1051.3	948.379	953.426
221	Irgm2	217.712	-0.737385	0.115255	-6.39788	1.5755e-10	1.06784e-08	134.436	151.357	148.171	261.472	279.644	246.695	233.136	252.732	260.806	197.061	215.541	231.487
222	Rab43	1606.63	-0.606348	0.0950104	-6.38191	1.74894e-10	1.18006e-08	1079.72	1225.1	1156.72	1816.35	1834.59	1789.68	1972.56	1886.09	1910.78	1566.41	1515.29	1526.31
223	Pcyox1	4363.81	-0.34772	0.054499	-6.38031	1.76734e-10	1.18713e-08	3679.67	3529.3	3655.16	4584.65	4743.7	4861.87	4736.4	4625.41	4948.56	4457.25	4188	4355.78
224	Tsr2	362.281	0.787943	0.12355	6.37751	1.79995e-10	1.20364e-08	545.355	489.686	555.847	262.742	282.717	274.275	274.737	260.042	321.616	362.043	362.759	355.557
225	Slc43a3	895.412	-0.658753	0.103372	-6.37265	1.85789e-10	1.23686e-08	600.313	653.508	620.518	874.537	846.102	873.391	1153.55	1107.01	1102.68	957.81	1000.43	955.092
226	Terf1	1041.74	-0.434804	0.0682582	-6.36999	1.89036e-10	1.25291e-08	793.935	817.33	857.919	1133.47	1229.2	1196.7	1095.48	1115.36	1152.68	1005.47	1053.3	1050.02
227	Rapgef5	4795.3	0.316664	0.0498174	6.3565	2.06405e-10	1.362e-08	5805.28	5382.09	5688.63	4580.85	4479.42	4861.87	4465.13	4123.08	4545.87	4549.82	4368.56	4693.02
228	Aatk	155.537	-0.86973	0.137116	-6.34304	2.25273e-10	1.47998e-08	89.6242	105.06	94.1419	163.738	135.212	148.63	204.536	190.071	195.943	189.729	174.059	175.697
229	Mapre1	8134.02	0.211779	0.0333971	6.34124	2.27925e-10	1.48439e-08	9314.16	8887.35	8980.32	7823.87	8041.04	7912.61	7787.1	7868.11	7921.49	7387.51	7665.93	8018.77
230	Rab39	163.419	0.637268	0.100494	6.34138	2.27714e-10	1.48439e-08	215.605	229.707	226.759	140.891	153.65	107.258	158.602	149.342	152.7	145.734	133.391	147.386
231	Tasp1	286.58	0.477298	0.0753808	6.33182	2.42278e-10	1.57103e-08	358.497	373.942	353.646	260.203	270.425	280.404	247.87	261.087	286.482	259.388	249.702	237.316
232	Chmp3	3019.56	-0.419191	0.0662312	-6.3292	2.4643e-10	1.59106e-08	2422.39	2375.42	2428.86	3340.76	3553.42	3370.98	3315.04	3072.47	3364.81	3152.06	2888.24	2950.21
233	Atp2c1	3243.01	0.277496	0.0439966	6.30721	2.84118e-10	1.82652e-08	3868.22	3742.09	3584.76	3147.82	3081.2	3053.8	3217.11	3121.55	3226.97	2954.09	2916.71	3001.84
234	Nup205	7105.93	-0.299085	0.0474654	-6.30111	2.95531e-10	1.89178e-08	6083.46	5909.17	6179.8	7801.02	7953.97	7751.72	7375.43	7359.51	7424.2	6877.9	7377.18	7177.76
235	Aurkb	2401.13	-0.233658	0.0371092	-6.29651	3.04424e-10	1.94041e-08	2111.24	2123.46	2125.97	2565.22	2564.94	2534.36	2535.9	2478.23	2491.85	2411.48	2502.71	2368.16
236	Stk17b	3045.63	-0.769922	0.122295	-6.29562	3.06174e-10	1.9433e-08	2041.06	1947.17	1986.8	3466.41	3620	3360.26	3957.25	3809.78	3809.39	3228.14	2645.05	2676.25
237	Nek6	1882	0.267945	0.0426912	6.27635	3.46619e-10	2.19072e-08	2149.29	2175.98	2147.25	1832.85	1709.62	1777.43	1794.89	1759.72	1718.89	1770.8	1921.16	1826.08
238	Clec4n	284.446	-1.41649	0.22605	-6.26626	3.69819e-10	2.32753e-08	121.754	113.963	142.441	473.443	453.781	433.631	351.005	257.954	283.779	283.218	226.928	271.456
239	Nrcam	620.328	1.14977	0.183779	6.25628	3.94279e-10	2.47109e-08	1043.36	1123.61	997.086	463.289	508.071	448.953	598.875	650.628	520.261	318.964	430.268	340.569
240	Cd28	2494.7	-2.46544	0.394197	-6.25434	3.99198e-10	2.49149e-08	626.524	593.855	483.808	1911.54	1709.62	1720.73	2745.64	2406.17	2933.73	4755.14	4769.55	5280.07
241	Spns1	1136.04	0.309753	0.049589	6.24641	4.19994e-10	2.61041e-08	1313.92	1317.7	1353.19	1064.93	978.241	1075.65	1065.15	1156.09	1085.12	1084.3	1059	1079.16
242	Hoxa7	445.796	-1.07101	0.171606	-6.24107	4.34575e-10	2.68988e-08	261.263	224.365	245.588	599.102	616.65	634.357	539.074	538.883	520.261	374.875	423.761	371.378
243	Uba3	2658.37	-0.406486	0.0652483	-6.22983	4.66945e-10	2.87834e-08	2157.75	2139.48	2109.6	2990.43	3152.91	2968	2788.1	2750.81	2890.49	2779.02	2649.93	2523.87
244	Sephs2	3337.78	-0.310271	0.0499354	-6.21344	5.18385e-10	3.18233e-08	2743.69	2877.57	2861.1	3567.96	3758.29	3637.6	3507.45	3618.66	3520.21	3273.05	3307.13	3380.71
245	Gm15487	4700.76	0.457667	0.0737198	6.20819	5.35971e-10	3.27686e-08	5731.72	5857.53	6127.41	4193.71	4243.82	4198.4	3984.12	3849.46	4197.23	4716.64	4358.8	4950.32
246	Cox5b	2773.98	-0.333642	0.0538153	-6.19977	5.65457e-10	3.44308e-08	2156.05	2369.19	2433.77	3060.24	2910.14	2968	2979.64	2982.65	3079.68	2855.1	2763.8	2729.55
247	P3h3	247.382	-1.50783	0.243358	-6.19593	5.79435e-10	3.51391e-08	107.38	89.9241	114.608	229.74	207.94	232.904	238.337	247.51	271.617	471.114	360.319	397.192
248	Galc	1542.63	0.278618	0.0450148	6.18948	6.03625e-10	3.64585e-08	1767.96	1783.35	1782.97	1384.79	1389	1446.46	1495.02	1512.21	1468.89	1425.26	1520.17	1535.47
249	Ltbp4	188.588	-2.93223	0.473891	-6.18756	6.11022e-10	3.6757e-08	24.5198	37.3942	32.745	201.816	216.135	240.565	383.938	399.985	383.777	107.238	135.018	99.9224
250	C1rl	128.3	-1.04572	0.169044	-6.18609	6.1674e-10	3.69526e-08	90.4697	66.7753	56.4851	175.161	153.65	159.355	118.735	129.499	131.079	178.73	145.592	134.063
251	Sned1	46.4841	-2.01375	0.325715	-6.18256	6.30713e-10	3.76392e-08	14.3737	12.4647	15.5539	64.7335	49.1681	45.9679	78.001	90.8581	64.8638	41.2454	43.1081	37.4709
252	Pcdh7	354.932	0.475038	0.076917	6.17599	6.57507e-10	3.90825e-08	448.121	437.156	464.979	303.359	281.692	327.905	314.604	315.393	322.967	351.044	350.559	341.402
253	Kcmf1	3217.85	-0.322786	0.052312	-6.17041	6.81132e-10	4.03268e-08	2703.1	2626.5	2791.51	3475.3	3572.88	3430.74	3425.11	3480.81	3539.13	3088.82	3211.15	3269.13
254	Eloc	2975.23	-0.428175	0.0694179	-6.16807	6.9127e-10	4.07659e-08	2291.34	2450.21	2345.36	3348.37	3443.82	3311.22	3168.58	3079.78	3085.08	3425.2	2981.78	2772.01
255	Lsm2	945.573	0.37491	0.0607893	6.16736	6.944e-10	4.07899e-08	1136.37	1103.13	1188.64	805.995	869.661	859.6	848.478	881.428	879.715	865.237	976.847	931.776
256	Cited2	1490.31	-0.393609	0.0638558	-6.16403	7.09164e-10	4.14487e-08	1245.44	1201.07	1170.63	1512.99	1551.87	1651.78	1720.36	1659.47	1694.57	1538.91	1482.76	1453.87
257	Asah2	528.06	-0.429748	0.0697236	-6.16359	7.11151e-10	4.14487e-08	431.211	414.897	410.131	564.831	517.29	606.777	553.807	509.641	577.017	575.602	570.979	604.531
258	Gm1070	77.0296	-1.01194	0.164312	-6.15865	7.33665e-10	4.25952e-08	43.9666	43.6265	43.3871	95.1963	74.7765	76.6132	77.1344	97.1242	105.404	77.908	96.79	92.4282
259	Inpp1	547.996	-0.544298	0.0884167	-6.15605	7.4582e-10	4.31337e-08	444.739	377.503	400.308	625.757	590.018	554.68	655.209	660.027	628.368	549.022	546.579	543.744
260	Cd86	997.626	-0.548778	0.0891665	-6.15453	7.53019e-10	4.33826e-08	726.294	718.502	778.513	1198.2	1147.26	945.407	1091.15	1028.68	952.686	1252.03	1039.48	1093.32
261	Arsb	16168.8	0.351112	0.0570614	6.15324	7.59161e-10	4.35689e-08	20167.1	20070	17650.4	16333.1	15858.8	14528.9	15484.1	14360.8	14299.8	14847.4	15098.4	15327.3
262	Cox7a2l	2580.22	0.462831	0.0752376	6.1516	7.67075e-10	4.3855e-08	3093.73	3298.7	3358	2270.75	2243.3	2267.75	2346.1	2061.54	2329.69	2722.2	2466.11	2504.72
263	Gm45193	283.235	-0.576272	0.093793	-6.14409	8.04248e-10	4.58055e-08	211.378	207.449	199.745	338.899	332.909	344.759	312.871	303.905	308.103	285.051	279.796	273.954
264	Mpp6	3913.48	-0.339624	0.0553901	-6.1315	8.70568e-10	4.93948e-08	3292.42	3225.69	3270.41	4234.33	4505.03	4437.44	3893.99	3835.88	3976.96	4062.21	4188	4039.36
265	Map4k3	556.707	0.358749	0.0585994	6.12206	9.23707e-10	5.22121e-08	695.011	681.108	627.067	508.983	527.533	528.631	513.94	504.419	490.532	516.942	540.072	546.242
266	Pml	1069.62	-0.326378	0.0533591	-6.11662	9.5578e-10	5.38219e-08	899.624	917.938	878.385	1171.55	1073.5	1127.75	1143.15	1133.12	1125.66	1038.47	1201.33	1124.96
267	Abcd1	1475.15	0.331516	0.0542124	6.11514	9.64717e-10	5.41217e-08	1729.92	1654.25	1841.09	1431.75	1378.76	1472.51	1467.29	1377.49	1389.17	1333.6	1310.32	1315.64
268	Slc17a9	22.6508	-2.9997	0.491938	-6.09772	1.07595e-09	5.9891e-08	4.22756	1.78068	4.91175	34.2707	28.6814	16.8549	34.6671	18.7982	17.5673	46.7448	34.1612	29.144
269	Gm45140	2700.25	-0.463826	0.0760721	-6.09718	1.07955e-09	5.9891e-08	2038.53	2163.52	2102.23	3086.9	3140.61	2972.59	3062.84	2914.77	3102.65	2611.29	2614.96	2592.15
270	1600014C10Rik	481.999	-0.447579	0.0733984	-6.09794	1.07445e-09	5.9891e-08	355.115	381.955	397.852	531.83	519.338	536.292	487.94	449.069	539.18	522.442	540.885	522.095
271	Phf19	1330.88	-0.271902	0.0446045	-6.09585	1.08857e-09	6.01685e-08	1150.74	1139.63	1163.27	1435.56	1376.71	1418.88	1306.08	1358.69	1368.9	1447.25	1420.13	1384.76
272	Wdr43	4054.16	0.370418	0.0608004	6.09237	1.11253e-09	6.12668e-08	4959.77	4830.08	4857.72	4004.59	4216.17	3930.26	3602.78	3717.87	3609.4	3423.37	3803.28	3694.63
273	Dstn	6485.12	0.660428	0.108723	6.07439	1.24462e-09	6.82902e-08	9081.64	8880.23	8895.18	5112.68	5031.54	5130.02	5131.6	5170.56	5501.26	6479.19	6602.86	6804.72
274	Fbxw4	407.182	-0.611397	0.100935	-6.0573	1.38423e-09	7.5673e-08	273.946	294.702	306.166	472.174	464.024	507.179	497.473	432.359	354.048	427.119	414.001	442.989
275	Evi2b	3609.87	0.328859	0.0543684	6.04872	1.46001e-09	7.95252e-08	4445.7	4250.47	4088.21	3527.34	3438.7	3415.42	3472.78	3469.32	3245.89	3031.08	3586.92	3346.57
276	Acacb	112.936	-1.12396	0.186215	-6.03581	1.58165e-09	8.58386e-08	57.4948	64.1043	58.941	114.236	116.774	131.775	113.535	108.612	106.755	185.146	150.472	147.386
277	Slc9a4	599.544	-0.532747	0.088318	-6.03214	1.61803e-09	8.74962e-08	441.357	462.976	444.514	633.373	622.796	654.277	582.408	585.878	616.206	690.173	699.49	761.076
278	Borcs5	172.768	-0.727028	0.120587	-6.02906	1.64919e-09	8.88607e-08	115.835	115.744	114.608	163.738	180.283	226.775	210.603	189.027	222.969	175.064	188.7	169.868
279	Slc16a1	3533.84	0.44007	0.0730706	6.02252	1.71717e-09	9.21917e-08	4418.64	4386.69	4395.2	3415.64	3626.15	3533.4	3128.71	3305.36	3183.73	2834.02	3221.72	2956.87
280	Naa20	3311.06	0.503316	0.0837221	6.01175	1.83535e-09	9.81847e-08	4044.08	4510.45	4198.73	2806.39	3141.64	2894.45	2886.04	2963.86	2678.33	3546.19	3270.52	2792
281	Zfand4	280.158	-0.709288	0.118494	-5.98588	2.15221e-09	1.14726e-07	191.086	189.642	188.284	280.512	353.396	373.872	327.604	307.038	262.158	257.555	298.503	332.242
282	Mrps18a	1096.01	0.335468	0.0561024	5.97956	2.23737e-09	1.18842e-07	1275.03	1297.22	1323.72	1035.74	1074.53	1060.33	982.813	977.508	924.308	1089.79	1038.66	1072.5
283	Plekhg5	47.5223	-1.23227	0.20615	-5.97756	2.26508e-09	1.19889e-07	21.9833	25.8198	22.9215	43.1557	51.2168	59.7583	60.6675	64.7495	64.8638	52.2442	50.4284	52.4593
284	Acadl	3361.56	-0.633254	0.106034	-5.97218	2.34104e-09	1.23473e-07	2434.23	2356.72	2342.09	3985.55	3901.7	4065.1	3936.45	3849.46	4109.39	2982.5	3239.62	3135.9
285	Smpdl3b	1494.04	0.333466	0.0558832	5.96721	2.41351e-09	1.26849e-07	1694.41	1790.47	1818.17	1397.48	1434.07	1345.33	1284.42	1320.05	1502.68	1450.92	1460.8	1429.72
286	Ifi27l2a	1673.69	-0.669011	0.112304	-5.95715	2.56669e-09	1.34428e-07	981.639	1372.9	1128.07	1815.08	1866.34	1622.67	1755.02	1772.26	1777	2327.16	1863.41	1802.77
287	Etfrf1	385.86	-0.529397	0.0889674	-5.95046	2.67385e-09	1.39552e-07	273.946	293.811	298.798	454.404	476.316	458.147	411.672	407.295	398.642	390.456	388.787	378.04
288	Dtd1	398.517	0.429801	0.0722413	5.94953	2.68917e-09	1.39865e-07	485.324	525.299	469.891	390.939	364.664	392.26	341.471	384.319	333.778	385.874	360.319	348.063
289	Taldo1	9624.01	0.303195	0.0509861	5.94663	2.73717e-09	1.41869e-07	10889.3	10793.6	11974.9	9043.65	8683.3	9198.18	8853.12	8529.18	8957.95	9664.25	9376.43	9524.27
290	Arhgef7	4257.91	0.566412	0.0952645	5.94568	2.75303e-09	1.42199e-07	5834.88	5565.5	5489.7	3408.03	3374.16	3538	3579.38	3516.31	3837.77	4122.71	4367.75	4460.7
291	Abhd12	9809.08	0.267399	0.0450317	5.93801	2.88494e-09	1.485e-07	10905.4	11285.9	11521.3	9327.97	9159.61	8628.18	9397.39	9121.32	9090.38	9886.98	9625.31	9759.09
292	Arhgap22	519.485	-0.436757	0.0735812	-5.93572	2.92566e-09	1.5008e-07	403.309	407.775	420.773	552.138	542.898	537.825	587.608	488.754	606.746	562.77	528.685	594.538
293	Rgl1	402.195	-0.745968	0.126018	-5.91953	3.22868e-09	1.65059e-07	273.1	277.785	248.862	495.021	434.319	436.695	534.741	495.02	471.614	351.961	440.842	366.382
294	Fbf1	327.343	-0.57313	0.096926	-5.91307	3.35799e-09	1.71086e-07	235.052	251.075	233.308	361.746	338.031	341.695	417.739	392.674	358.102	315.298	360.319	323.082
295	Ermp1	2230.76	0.250397	0.0424795	5.89454	3.75719e-09	1.90776e-07	2632.08	2487.6	2482.07	2098.13	2144.96	2031.78	2202.23	2217.15	2212.12	2030.19	2104.98	2125.85
296	Ddx47	2152.69	-0.300196	0.0510255	-5.88326	4.02274e-09	2.0357e-07	1872.81	1794.03	1834.54	2287.25	2270.95	2447.03	2131.16	2122.11	2139.15	2319.82	2300.18	2313.2
297	Luc7l	1511.83	0.495553	0.0843039	5.87818	4.14806e-09	2.09205e-07	2150.14	1737.05	1915.58	1363.21	1256.86	1307.02	1251.48	1369.14	1294.57	1516	1474.62	1506.33
298	Slc31a1	2440.3	0.222681	0.0378908	5.87693	4.17953e-09	2.10084e-07	2662.52	2807.23	2730.93	2339.29	2408.21	2371.94	2301.9	2192.08	2360.77	2361.99	2366.88	2379.82
299	Gm28048	3173.14	-0.234588	0.0399587	-5.87076	4.33808e-09	2.17325e-07	2754.68	2833.05	2815.25	3336.95	3412.06	3317.35	3159.04	3147.66	3412.1	3418.78	3190	3280.79
300	Immt	5915.74	-0.30673	0.052288	-5.86615	4.4603e-09	2.21963e-07	5007.12	4993.9	5064.02	6653.59	6689.94	6481.48	6039.01	6161.64	6149.89	5880.68	6088.82	5778.85
301	Xpo5	3066.93	0.311687	0.053133	5.86616	4.45997e-09	2.21963e-07	3676.28	3499.03	3599.5	2893.97	2968.53	2799.45	2731.77	2718.43	2783.74	2914.67	3113.55	3104.26
302	Parp3	295.798	-0.498329	0.0851182	-5.85455	4.78297e-09	2.37232e-07	221.524	244.843	213.661	310.975	284.765	297.259	324.138	317.481	317.562	349.211	335.918	332.242
303	Snx9	2112.02	0.260277	0.0445044	5.84834	4.96494e-09	2.45445e-07	2485.8	2360.28	2386.29	2046.09	2075.31	1996.54	2031.49	1838.05	2009.42	2056.77	2079.76	1978.46
304	Glo1	2560.47	0.2484	0.0425164	5.84245	5.14384e-09	2.53453e-07	2939	2929.21	2848.82	2303.75	2498.36	2433.24	2310.56	2395.73	2535.09	2504.97	2490.51	2536.36
305	Cenpf	5818.04	-0.446654	0.0765583	-5.83416	5.40609e-09	2.65501e-07	4836.33	4620.85	4264.22	5766.36	5961.64	5778.17	6699.42	6525.08	6918.8	5545.21	6572.77	6327.59
306	Zxdc	667.435	-0.395621	0.0679579	-5.82156	5.8301e-09	2.85389e-07	536.9	541.325	538.655	745.07	698.597	703.309	748.81	745.663	764.852	637.012	662.889	686.134
307	Hnrnph1	6815.64	0.37439	0.0643896	5.81445	6.08334e-09	2.96815e-07	8664.8	8088.72	7923.47	6470.81	5802.86	6397.2	6644.82	7117.22	6178.27	5789.94	6334.46	6375.05
308	BC029722	1029.57	0.340729	0.0586204	5.81247	6.15576e-09	2.99374e-07	1158.35	1276.74	1232.85	993.849	965.949	985.246	907.412	875.162	947.281	995.389	1024.02	992.563
309	Ergic1	2804.12	0.360257	0.0620293	5.80785	6.32789e-09	3.06749e-07	3416.71	3326.3	3347.36	2374.83	2587.47	2477.67	2601.77	2563.87	2551.31	2638.79	2931.35	2831.97
310	Ino80b	417.32	-0.389485	0.067115	-5.80325	6.50408e-09	3.14273e-07	344.123	341.89	329.906	441.711	442.513	444.357	422.939	430.271	451.344	466.531	471.749	420.507
311	Rgs2	3273.43	-0.697824	0.120277	-5.8018	6.56078e-09	3.15993e-07	2063.89	2319.33	2311.8	4184.83	4360.6	4184.61	3134.78	3005.63	3179.68	3659.84	3510.47	3365.72
312	Ppp1r21	1314.86	0.352232	0.0608174	5.79163	6.97064e-09	3.34658e-07	1558.28	1572.34	1572.58	1281.98	1228.18	1320.81	1261.02	1298.12	1275.65	1133.79	1125.69	1149.94
313	Fcrl1	565.071	0.433089	0.0748199	5.78842	7.10536e-09	3.40036e-07	666.263	701.586	736.763	583.871	524.46	507.179	475.806	476.222	490.532	544.439	509.164	564.562
314	Gm20427	3203.04	0.288627	0.0499672	5.77632	7.63518e-09	3.64131e-07	3600.19	3670.86	3854.09	3039.93	2875.31	2932.75	3025.57	2883.44	3016.16	3325.29	3111.11	3101.76
315	A530064D06Rik	91.4337	-1.4678	0.254128	-5.77583	7.65748e-09	3.64131e-07	45.6576	29.3811	42.5685	100.273	91.1659	105.726	162.936	121.144	149.997	79.7411	87.843	80.7706
316	Ifi211	403.901	-0.632354	0.10951	-5.7744	7.72293e-09	3.66082e-07	301.848	301.824	254.592	482.328	503.973	373.872	432.472	480.399	448.641	470.197	429.455	367.215
317	Krcc1	1325.48	-0.482253	0.0836064	-5.76813	8.01565e-09	3.78758e-07	990.094	1090.66	980.713	1485.06	1500.65	1495.49	1451.69	1451.64	1608.08	1306.1	1329.85	1215.72
318	Tns3	3675.87	0.23643	0.0410318	5.76211	8.30679e-09	3.91281e-07	4160.76	3994.94	4283.05	3380.1	3368.02	3541.06	3640.92	3455.74	3591.83	3489.36	3495.01	3709.62
319	Surf1	331.279	0.544101	0.0945794	5.75284	8.77547e-09	4.12062e-07	413.455	436.265	451.063	295.743	265.303	326.372	292.937	251.687	275.671	340.962	327.784	298.102
320	Washc1	886.861	0.306597	0.0533076	5.75147	8.84708e-09	4.14126e-07	986.712	1021.22	1100.23	846.612	796.934	790.648	821.611	832.344	862.147	878.069	856.469	849.34
321	Znf41-ps	27.0258	-6.87514	1.19569	-5.74995	8.92681e-09	4.15263e-07	0.845512	0	0	31.7321	45.0708	42.9034	47.6673	32.3747	35.1345	28.4135	26.0276	34.1402
322	Usp18	89.7414	-1.33825	0.232734	-5.75014	8.91679e-09	4.15263e-07	34.666	44.5169	45.843	132.006	131.115	144.033	89.2679	78.326	70.2691	120.986	97.6033	88.2648
323	Plekha8	780.981	-0.340487	0.0592765	-5.74404	9.2444e-09	4.28705e-07	672.182	646.385	634.435	785.687	847.126	873.391	780.877	881.428	767.554	816.659	812.548	853.504
324	Tm7sf3	132.46	-0.970242	0.169387	-5.72795	1.01653e-08	4.69956e-07	74.405	73.898	81.8625	156.122	148.529	188.468	115.268	119.055	159.457	172.314	124.444	175.697
325	Fam84b	1047.65	0.321976	0.056264	5.7226	1.04908e-08	4.83514e-07	1215	1226.89	1253.32	1048.43	973.119	959.197	930.813	993.173	1043.23	914.731	958.953	1055.01
326	Zfp212	327.473	-0.468486	0.0820075	-5.71273	1.1118e-08	5.10848e-07	257.036	256.417	249.681	343.976	334.958	318.711	377.005	385.364	385.129	355.627	331.038	334.74
327	Atf7ip	1256.69	-0.385489	0.0675171	-5.7095	1.13307e-08	5.19029e-07	1041.67	991.836	1029.01	1383.52	1384.9	1437.26	1365.89	1309.61	1371.6	1132.87	1298.12	1333.96
328	Farsa	1473.41	0.272184	0.047742	5.70114	1.1901e-08	5.43491e-07	1674.96	1655.14	1737.12	1512.99	1415.63	1452.59	1367.62	1355.56	1429.71	1393.18	1321.71	1364.77
329	Aim2	2345.31	-0.427951	0.0751321	-5.69598	1.22666e-08	5.58482e-07	1904.94	1842.11	1837.81	2702.31	2763.66	2679.93	2510.77	2490.77	2601.31	2228.17	2253.82	2328.19
330	Gtf3c3	1634.96	-0.315217	0.055452	-5.6845	1.31196e-08	5.95509e-07	1395.94	1387.15	1358.92	1723.69	1855.07	1820.33	1675.29	1705.42	1763.48	1560.91	1641.36	1731.99
331	Nle1	532.956	0.396925	0.0700595	5.66554	1.46566e-08	6.63268e-07	633.288	653.508	667.18	450.596	536.752	476.534	505.273	442.803	493.235	501.361	494.523	540.414
332	Iffo2	602.186	-0.377229	0.066608	-5.66342	1.48381e-08	6.69458e-07	467.568	507.492	498.543	672.72	689.378	669.599	657.809	602.588	637.827	608.599	593.754	620.352
333	Ift122	209.277	-0.722746	0.127686	-5.66031	1.51097e-08	6.79663e-07	149.656	140.673	133.436	200.547	220.232	191.533	204.536	233.934	239.185	252.055	274.916	270.623
334	Txndc9	1635.27	-0.337201	0.0596108	-5.65671	1.54301e-08	6.92001e-07	1367.19	1387.15	1338.45	1870.92	1829.46	1798.88	1712.56	1733.62	1740.51	1613.15	1662.51	1568.78
335	Sgo2a	1930.44	-0.614053	0.108726	-5.64772	1.62587e-08	7.26981e-07	1357.89	1414.75	1368.74	2219.98	2319.1	2169.69	2337.43	2283.99	2304.01	1637.9	1938.24	1813.59
336	Gfer	590.738	0.353336	0.0625764	5.64647	1.63775e-08	7.30115e-07	687.401	749.664	681.915	580.063	559.288	548.551	533.874	564.991	501.343	575.602	580.74	525.425
337	Slc41a3	319.141	-0.461546	0.0819285	-5.63352	1.76565e-08	7.84799e-07	240.125	244.843	261.141	345.245	346.226	314.114	370.938	351.945	375.669	308.882	339.985	330.577
338	Lmbrd1	1712.34	-0.318843	0.0566634	-5.62697	1.83399e-08	8.12762e-07	1406.93	1463.71	1460.43	1816.35	1869.41	1771.3	1908.43	1749.28	1936.45	1815.71	1641.36	1708.67
339	Rad18	1847.21	-0.399641	0.0711025	-5.62064	1.90251e-08	8.40641e-07	1535.45	1534.94	1402.31	1920.43	1854.05	2001.14	1772.36	1830.74	1948.62	2105.35	2092.78	2168.32
340	Mgst2	8.93663	2.79599	0.497539	5.61964	1.91361e-08	8.43057e-07	25.3653	28.4908	22.1029	2.53857	1.02434	4.59679	3.46671	1.04435	0	5.49939	8.94697	4.16343
341	Adrb1	25.0063	-2.25595	0.40196	-5.61236	1.99582e-08	8.76699e-07	7.6096	7.1227	4.91175	30.4628	24.5841	21.4517	50.2673	37.5965	40.5398	31.1632	25.2142	19.1518
342	Selenon	2885.11	-0.255803	0.0456158	-5.60777	2.04955e-08	8.97669e-07	2430.85	2518.76	2607.32	3072.94	3167.25	3004.77	2964.91	2852.11	2862.11	3096.15	2924.03	3120.08
343	Kctd20	3085.62	0.316413	0.0566061	5.58973	2.27417e-08	9.93141e-07	3644.15	3618.33	3604.41	2788.62	2762.63	2848.48	2824.5	2795.72	2763.47	3130.07	3071.25	3175.87
344	Rb1cc1	1481.41	-0.328183	0.0587348	-5.58754	2.30314e-08	1.00287e-06	1335.91	1238.46	1158.35	1521.87	1460.7	1486.3	1568.69	1558.16	1566.19	1681.9	1559.21	1641.23
345	Foxp4	837.868	0.386013	0.0691142	5.58515	2.335e-08	1.0138e-06	1012.08	1006.97	1035.56	743.8	682.208	730.89	833.745	774.905	797.284	758.915	832.882	845.177
346	Gnptg	349.274	0.437016	0.0783268	5.5794	2.41353e-08	1.04486e-06	452.349	438.936	409.313	305.897	299.106	341.695	309.404	332.102	360.805	303.383	296.063	342.234
347	Mcm3	9784.81	-0.378657	0.0679639	-5.57144	2.52644e-08	1.09059e-06	7965.56	7905.31	8086.38	11252.2	11393.7	10745.8	10462.5	10446.6	10652.5	9210.55	9779.04	9517.61
348	Ext1	835.992	-0.37593	0.0676413	-5.55771	2.73343e-08	1.17655e-06	671.336	706.038	671.273	891.037	891.173	876.455	913.479	987.952	939.173	813.909	818.241	851.838
349	Zfp93	38.4671	-1.28335	0.231242	-5.54981	2.85982e-08	1.22743e-06	21.1378	15.1357	18.8284	58.3871	37.9004	53.6292	45.0673	42.8182	39.1885	43.9951	45.5482	39.969
350	Hcn3	68.8957	-1.00841	0.181902	-5.54371	2.96135e-08	1.26504e-06	46.5031	32.0522	39.294	67.272	68.6305	75.0809	67.6009	81.459	77.0257	99.9055	88.6563	83.2687
351	Cdr2	740.687	-0.39314	0.0709187	-5.54353	2.96433e-08	1.26504e-06	570.72	622.346	604.145	823.765	885.026	809.035	748.81	807.28	779.716	775.413	710.064	751.916
352	Gstk1	136.58	-0.746519	0.134745	-5.54022	3.02089e-08	1.28551e-06	91.3152	90.8144	88.4115	172.623	169.015	142.501	154.269	157.696	172.97	148.483	130.951	119.907
353	Taf4b	389.172	0.478518	0.0865191	5.53077	3.18825e-08	1.35288e-06	481.942	472.769	528.832	326.206	333.934	372.34	352.738	377.009	298.644	358.377	405.054	362.219
354	Nos1	32.5099	-3.62231	0.655698	-5.52436	3.30683e-08	1.39924e-06	0.845512	6.23236	3.2745	59.6563	43.0221	61.2906	13.8669	15.6652	12.162	54.0773	65.0689	54.9573
355	Adam9	7248.87	0.235703	0.0427233	5.51698	3.44873e-08	1.45517e-06	8444.97	8077.14	7990.6	7243.8	7246.15	7195.51	6909.16	6796.61	6895.83	6518.6	6641.91	7026.21
356	Oplah	75.6374	0.936546	0.170034	5.50798	3.62975e-08	1.52725e-06	108.225	109.512	134.255	46.9635	80.9226	76.6132	57.2008	61.6164	63.5124	66.9092	56.1219	45.7978
357	Als2	977.604	-0.396924	0.0720743	-5.50715	3.64681e-08	1.53013e-06	838.747	772.813	758.866	1075.08	1039.7	1060.33	955.946	949.311	1012.14	994.472	1131.39	1142.45
358	Mlycd	220.522	-0.552606	0.100511	-5.49799	3.84151e-08	1.60732e-06	152.192	177.177	161.269	252.587	261.206	214.517	266.937	233.934	241.888	242.89	230.995	210.67
359	Reps2	87.1498	1.01877	0.185361	5.49615	3.88174e-08	1.61962e-06	158.111	142.454	121.975	64.7335	69.6549	73.5487	48.534	51.173	64.8638	70.5754	91.9098	88.2648
360	Tmf1	4048.94	-0.58292	0.106109	-5.49361	3.93794e-08	1.63851e-06	3042.15	2894.49	2905.3	4665.89	4858.43	4863.41	4687	4853.08	4624.24	3866.98	3735.77	3590.54
361	Ap1s2	536.296	0.667799	0.121711	5.48677	4.09359e-08	1.69855e-06	758.424	745.213	728.577	388.401	385.15	401.453	486.207	450.113	463.506	548.105	508.351	572.056
362	Ccdc125	38.6506	-6.49315	1.18368	-5.48557	4.12146e-08	1.7054e-06	0	0.890338	0.818625	76.157	91.1659	78.1455	55.4674	64.7495	59.4584	14.665	8.13361	14.1557
363	Zmat3	1674.44	0.554379	0.101105	5.4832	4.17693e-08	1.72359e-06	2341.22	2127.02	2130.06	1695.76	1650.21	1720.73	1482.02	1500.73	1525.65	1238.28	1316.83	1364.77
364	Cul1	5367.8	-0.372056	0.067865	-5.4823	4.19834e-08	1.72766e-06	4406.81	4278.96	4502.44	6034.18	6186.99	6003.41	5753.88	5798.21	5870.17	5285.83	5226.66	5066.07
365	Rbpms	26.7945	-4.96924	0.907089	-5.47822	4.29621e-08	1.76309e-06	2.53653	0.890338	0	22.8471	16.3894	16.8549	19.0669	14.6209	25.6752	76.9914	73.2025	52.4593
366	Etv6	2442.52	-0.339711	0.0620659	-5.47338	4.41526e-08	1.807e-06	2079.96	2033.53	1994.17	2693.42	2718.59	2667.67	2621.7	2604.6	2670.22	2219.92	2541.75	2464.75
367	U2af1	2371.67	0.241557	0.0441519	5.47105	4.47377e-08	1.82596e-06	2729.31	2656.77	2657.26	2294.87	2344.71	2388.8	2150.23	2203.57	2172.94	2224.5	2388.84	2248.25
368	Ier5l	23.2108	-3.12748	0.572881	-5.45921	4.78253e-08	1.94503e-06	2.53653	3.56135	4.09313	39.3478	23.5597	18.3872	52.0007	37.5965	44.5938	25.6638	12.2004	14.9884
369	Dhx58	342.459	-0.779088	0.142719	-5.45888	4.79149e-08	1.94503e-06	197.004	239.501	232.49	370.631	358.518	415.244	311.138	304.949	337.832	450.95	444.095	447.153
370	Susd3	378.4	-0.875211	0.160343	-5.45837	4.80539e-08	1.9454e-06	218.142	243.062	238.22	398.555	372.858	367.743	370.938	355.078	395.939	599.433	458.736	522.095
371	Slc9a2	25.7969	-6.80704	1.2517	-5.43822	5.38162e-08	2.15864e-06	0.845512	0	0	31.7321	38.9248	30.6453	53.7341	46.9956	56.7558	14.665	22.7741	12.4903
372	Cdc25b	1974.68	-0.3496	0.064289	-5.43795	5.38975e-08	2.15864e-06	1588.72	1651.58	1671.63	2079.09	2132.67	2027.19	2269.83	2161.8	2276.99	1901.87	1982.16	1952.65
373	Cracr2a	18.0459	-2.64231	0.485818	-5.4389	5.36117e-08	2.15864e-06	2.53653	4.45169	4.09313	19.0393	28.6814	26.0485	13.0002	20.8869	12.162	24.7472	30.0944	30.8094
374	Vapa	3618.63	0.243031	0.044691	5.43803	5.38716e-08	2.15864e-06	4209.8	3974.47	4099.68	3496.88	3363.92	3623.8	3409.51	3340.86	3294.54	3448.11	3434.82	3727.11
375	Ppp1r26	213.214	-0.761069	0.140112	-5.43188	5.57645e-08	2.20645e-06	151.347	152.248	118.701	231.01	186.429	183.872	272.137	238.111	243.239	262.137	256.209	263.129
376	Snhg12	185.643	0.636067	0.117078	5.43286	5.5459e-08	2.20645e-06	259.572	235.939	269.328	140.891	174.137	121.049	178.536	156.652	149.997	177.813	178.939	184.856
377	Dok1	1185.63	-0.322554	0.0593646	-5.43344	5.52778e-08	2.20645e-06	933.445	1017.66	1044.57	1139.82	1235.35	1195.17	1306.95	1281.41	1316.19	1312.52	1203.77	1240.7
378	Aplf	389.314	-0.358896	0.0660709	-5.43198	5.57327e-08	2.20645e-06	329.75	312.508	321.72	426.479	415.881	389.195	423.806	422.96	409.452	422.536	395.293	402.188
379	Cfl1	43903.8	0.181477	0.0334109	5.43167	5.58278e-08	2.20645e-06	47622.6	47918.9	48975.9	42230.3	43321.2	42944.8	43552.3	41629.7	44304.6	41301.3	42714.5	40329.5
380	Atp6ap1	5548.28	0.272603	0.0502192	5.42826	5.69072e-08	2.24319e-06	6253.4	6389.95	6465.5	5238.33	5221.04	5283.25	5655.08	5427.47	5635.04	5105.26	4965.57	4939.5
381	Tns4	51.9382	-1.21142	0.223231	-5.42677	5.73837e-08	2.25604e-06	20.2923	26.7101	31.1078	63.4642	76.8252	58.226	66.7342	71.0156	62.1611	43.0785	53.6818	49.9612
382	Klhl41	93.7587	-1.97584	0.364299	-5.42368	5.83859e-08	2.28943e-06	23.6743	27.6005	36.8381	73.6185	91.1659	95.0004	61.5342	76.2373	94.593	183.313	169.179	192.351
383	Smarca2	1212.71	-0.311187	0.0574744	-5.41435	6.15121e-08	2.40572e-06	1054.35	1018.55	1010.18	1288.32	1182.08	1208.96	1356.35	1310.65	1322.95	1185.12	1279.42	1335.63
384	Clec7a	543.744	-0.670206	0.12389	-5.4097	6.31291e-08	2.46253e-06	377.944	366.819	383.935	651.143	724.206	707.906	563.341	461.601	560.801	612.265	525.431	589.542
385	Gm45233	1387.02	-0.272245	0.0503519	-5.40685	6.41444e-08	2.49564e-06	1163.42	1200.18	1232.85	1426.68	1468.9	1500.09	1425.69	1439.11	1516.19	1528.83	1392.47	1349.79
386	Stambp	763.743	-0.385886	0.0714369	-5.40178	6.59846e-08	2.54738e-06	687.401	579.61	595.141	831.381	902.44	789.116	837.211	817.723	801.338	789.162	781.64	752.749
387	Riox1	882.67	0.320813	0.0593883	5.40195	6.59185e-08	2.54738e-06	990.094	1054.16	1068.31	822.496	788.739	784.519	799.944	822.945	944.578	834.073	834.508	847.675
388	Glis2	27.0458	-2.91757	0.540035	-5.40257	6.56945e-08	2.54738e-06	2.53653	5.34203	5.73038	53.3099	41.9978	30.6453	38.1338	49.0843	48.6478	21.081	11.3871	16.6537
389	Rpn2	10538.3	0.265944	0.0492567	5.39914	6.69599e-08	2.57839e-06	11991	11968.8	12231.1	9565.32	9634.91	9458.67	10079.5	9688.4	10035	10309.5	10677	10819.9
390	Pyroxd1	321.876	-0.423011	0.0783648	-5.39797	6.74006e-08	2.5887e-06	255.344	256.417	257.048	349.053	327.788	326.372	371.805	331.058	382.426	318.048	342.425	344.732
391	ENSMUSG00000116953.1	140.359	0.971758	0.180079	5.39628	6.80363e-08	2.60643e-06	205.459	271.553	190.74	91.3884	104.482	107.258	134.335	106.523	98.647	160.399	125.258	88.2648
392	Itpr1	1754.12	-0.333552	0.0618858	-5.3898	7.05346e-08	2.69525e-06	1565.04	1401.39	1437.51	1801.11	1856.1	1777.43	2007.23	1972.77	1886.45	1674.56	1812.17	1857.72
393	Tuft1	955.699	0.540194	0.100235	5.38925	7.07524e-08	2.69669e-06	1178.64	1236.68	1331.08	888.499	870.686	873.391	768.744	748.796	717.555	904.649	1002.06	947.597
394	Ly86	2100.31	-0.346116	0.0642963	-5.38314	7.31971e-08	2.78279e-06	1705.4	1789.58	1746.13	2066.39	2303.73	1944.44	2380.77	2244.3	2189.15	2384.9	2283.92	2164.99
395	Mrpl51	1656.78	-0.353691	0.0658498	-5.37118	7.82213e-08	2.96627e-06	1318.15	1380.91	1409.67	1906.46	1846.88	1844.85	1718.62	1782.7	1816.19	1602.15	1656	1598.76
396	Hpcal1	1248.06	0.238788	0.0444646	5.3703	7.86077e-08	2.9734e-06	1415.39	1383.58	1423.59	1208.36	1190.28	1270.25	1181.28	1118.5	1213.49	1227.28	1163.92	1180.75
397	Agpat5	2071.45	0.38471	0.0716981	5.36569	8.06406e-08	3.04261e-06	2574.58	2475.14	2482.07	2085.43	2053.79	2034.85	1940.49	1986.35	1993.21	1728.64	1695.86	1806.93
398	Uxs1	1588.18	-0.357288	0.0666228	-5.36285	8.19194e-08	3.06768e-06	1324.07	1266.95	1340.09	1728.76	1801.81	1736.06	1692.62	1767.03	1779.7	1541.66	1538.88	1540.47
399	0610030E20Rik	710.318	-0.401647	0.0748873	-5.36335	8.16936e-08	3.06768e-06	575.793	597.416	543.567	767.917	780.544	730.89	804.277	815.635	805.392	657.177	714.944	730.266
400	Gm44790	287.352	-0.417635	0.0778698	-5.36325	8.174e-08	3.06768e-06	220.679	227.926	240.676	280.512	320.617	321.775	302.471	313.304	285.13	307.966	309.077	318.086
401	Dido1	2862.09	0.298089	0.0556181	5.35956	8.34229e-08	3.11619e-06	3364.29	3322.74	3303.97	2565.22	2586.45	2514.45	2730.9	2841.67	2658.06	2625.04	2901.26	2931.06
402	Snx5	12380	0.28912	0.0539907	5.355	8.55559e-08	3.18792e-06	14049	14417.2	14524.9	12402.2	12696.6	12080.4	11882.2	11874.2	11532.2	11388.3	10931.6	10781.6
403	Tmsb4x	47920	0.736633	0.137727	5.3485	8.8686e-08	3.29635e-06	66842.8	69988.5	68513.2	36842.2	40420.3	36875.5	35418.5	34651.4	36292.6	56203.7	46830.9	46160.8
404	Zranb3	1466.68	0.543179	0.101684	5.34183	9.20113e-08	3.41148e-06	1910.01	2015.72	1832.9	1269.28	1243.54	1141.54	1189.95	1232.33	1244.57	1487.58	1609.64	1423.06
405	Baz1a	3464.5	0.200805	0.0376153	5.33839	9.37757e-08	3.46831e-06	4022.94	3693.12	3798.42	3402.95	3267.63	3395.5	3337.58	3354.44	3282.38	3220.81	3464.1	3334.08
406	Tkfc	249.877	-0.523949	0.098198	-5.33564	9.52084e-08	3.51263e-06	179.248	169.164	214.48	307.167	246.865	260.485	285.137	274.663	279.725	270.386	248.075	263.129
407	Tmem143	221.661	-0.524588	0.0984276	-5.32969	9.83815e-08	3.62078e-06	164.875	154.028	178.46	241.164	236.622	292.662	235.737	233.934	245.942	224.558	218.794	233.152
408	Capn15	486.117	0.502196	0.094295	5.32579	1.00514e-07	3.69018e-06	629.906	656.179	586.954	439.172	350.323	429.034	429.872	421.916	440.533	474.78	470.123	504.608
409	Esf1	1955.7	0.546567	0.102722	5.32084	1.03292e-07	3.7829e-06	2516.24	2557.05	2613.87	1675.45	1857.12	1745.25	1492.42	1510.12	1560.78	2049.44	1982.97	1907.69
410	Adra1a	58.487	1.35546	0.255138	5.31265	1.08044e-07	3.94729e-06	103.152	112.183	108.059	20.3085	38.9248	53.6292	22.5336	37.5965	44.5938	52.2442	54.4952	54.1246
411	Camkk2	866.64	0.409122	0.0770318	5.31108	1.0898e-07	3.97181e-06	1121.99	1015.88	1050.3	774.263	772.35	809.035	871.878	841.743	902.687	705.754	736.092	797.714
412	Xpc	444.242	-0.450661	0.0849197	-5.30691	1.115e-07	4.05378e-06	358.497	353.464	335.636	416.325	448.659	455.082	465.406	452.202	487.829	536.19	494.523	527.091
413	Fzd1	55.3285	-3.26131	0.61482	-5.30449	1.12991e-07	4.09806e-06	9.30063	8.90338	4.09313	91.3884	98.3363	78.1455	110.935	107.568	99.9983	17.4147	18.7073	19.1518
414	Pcm1	3050.58	-0.23032	0.0434849	-5.29655	1.18012e-07	4.26979e-06	2782.58	2712.86	2605.68	3161.79	3131.4	3177.92	3122.64	2965.94	3252.65	3079.66	3300.62	3313.26
415	Cyp2r1	17.254	-7.19485	1.35968	-5.29156	1.21277e-07	4.37737e-06	0	0	0	34.2707	33.8031	12.2581	39.0005	38.6408	33.7832	4.58282	4.88017	5.82881
416	Cxcl14	16.7433	2.70514	0.511398	5.28969	1.22525e-07	4.41177e-06	42.2756	48.9686	48.2989	1.26928	1.02434	3.06453	7.8001	5.22173	4.05398	10.9988	15.4539	12.4903
417	Znrf2	3565.89	-0.436818	0.0826236	-5.28684	1.24446e-07	4.4702e-06	2956.75	2745.8	2749.76	4050.28	4050.23	3963.97	4062.99	4002.98	4068.85	3411.45	3281.1	3446.49
418	Tgoln1	6884.83	-0.220291	0.0417416	-5.2775	1.30955e-07	4.69277e-06	6328.65	5970.6	6084.02	7061.03	6992.12	6781.8	7272.3	6885.38	7371.5	7473.66	6950.17	7446.72
419	Orai3	503.828	-0.491872	0.0932281	-5.27601	1.32029e-07	4.71994e-06	350.042	419.349	387.21	576.255	577.726	592.986	575.474	573.346	540.531	489.445	483.95	479.628
420	Abcd4	450.855	-0.485445	0.092074	-5.27233	1.34699e-07	4.80394e-06	325.522	341.89	374.112	415.056	447.635	462.744	537.341	558.725	495.937	481.196	489.643	480.46
421	Cdc5l	3052.93	0.18466	0.035049	5.26862	1.3745e-07	4.89041e-06	3449.69	3263.98	3353.91	3004.4	3028.96	2966.46	2944.97	2835.4	2840.49	2943.09	3010.25	2993.51
422	Chchd3	2539.12	-0.413577	0.0785061	-5.26808	1.37855e-07	4.8932e-06	1958.2	2020.18	2117.78	2939.66	3071.98	2903.64	2708.37	2616.09	2587.79	2652.54	2545.01	2348.18
423	Uhrf1bp1l	1800.7	-0.299181	0.0568432	-5.26327	1.41516e-07	5.01126e-06	1610.7	1537.61	1457.97	1854.42	1952.38	1993.48	1789.69	1741.97	1835.1	1875.29	1948	2011.77
424	Suclg2	2560.42	-0.264098	0.0502015	-5.26077	1.43453e-07	5.06789e-06	2244.83	2197.35	2229.12	2674.38	2917.31	2805.58	2606.97	2640.11	2710.76	2484.81	2579.17	2634.62
425	Etfb	1445.78	-0.265592	0.0505045	-5.25878	1.45018e-07	5.11111e-06	1218.38	1254.49	1289.33	1487.6	1542.65	1575.17	1468.15	1512.21	1564.84	1585.66	1447.78	1403.08
426	Tmem181a	323.144	0.503474	0.0957785	5.25665	1.46703e-07	5.15838e-06	457.422	396.2	392.122	271.627	274.522	297.259	253.937	297.639	285.13	292.384	315.584	343.9
427	Casp2	1486.1	-0.406631	0.0773801	-5.25498	1.48039e-07	5.19315e-06	1204.01	1197.5	1180.46	1615.8	1562.11	1521.54	1733.36	1762.86	1717.54	1427.09	1441.28	1469.69
428	Ifi44l	60.8101	-1.15596	0.22004	-5.25338	1.49331e-07	5.21853e-06	31.2839	28.4908	35.2009	79.9649	82.9712	73.5487	58.0674	46.9956	55.4045	89.8233	80.5227	67.4476
429	Coro7	1594.62	-0.310195	0.0590485	-5.25322	1.49459e-07	5.21853e-06	1357.05	1384.47	1316.35	1524.41	1560.06	1644.12	1742.89	1734.66	1683.75	1666.31	1686.1	1835.24
430	Plpp1	68.8779	0.851535	0.162166	5.25099	1.51284e-07	5.26995e-06	103.152	87.2531	117.063	68.5413	55.3142	76.6132	58.9341	52.2173	56.7558	56.827	44.7349	49.1285
431	Zeb1	63.7404	0.727723	0.138728	5.24567	1.55719e-07	5.41188e-06	88.7787	91.7048	92.5047	59.6563	61.4602	47.5002	49.4007	52.2173	49.9991	54.0773	62.6288	54.9573
432	Ctsa	26700.5	0.302401	0.0577345	5.23779	1.62514e-07	5.63495e-06	30094.3	31768.1	31482.7	24025	23757.4	23881.9	25194.3	23634.6	25667.1	26694	26885.6	27321.3
433	Epsti1	223.797	-0.754189	0.144028	-5.2364	1.63737e-07	5.66424e-06	136.973	146.906	157.995	293.205	295.009	306.453	204.536	215.135	213.51	244.723	252.955	218.164
434	Hibadh	1413.45	-0.256012	0.048914	-5.23391	1.65959e-07	5.72788e-06	1246.28	1224.21	1224.66	1500.29	1533.43	1559.84	1443.02	1475.66	1532.41	1433.51	1393.29	1394.75
435	Hn1l	4902.3	0.306941	0.0586556	5.23294	1.66836e-07	5.7449e-06	5737.64	5688.37	5743.48	4805.51	4901.45	4795.99	4719.06	4693.29	4894.51	4131.87	4315.69	4400.75
436	Clk3	1359.47	-0.243938	0.046643	-5.2299	1.69603e-07	5.81346e-06	1168.5	1187.71	1228.76	1405.1	1412.56	1402.02	1429.15	1385.85	1367.54	1537.08	1407.93	1381.43
437	Clcn5	1444.48	0.4986	0.095333	5.23009	1.6943e-07	5.81346e-06	1926.92	1844.78	1775.6	1318.79	1516.02	1402.02	1371.09	1393.16	1295.92	1043.05	1194.01	1252.36
438	Necap1	3591.85	-0.405432	0.0776033	-5.22442	1.74703e-07	5.9746e-06	2948.3	2806.34	2907.76	4188.64	4145.49	4137.11	3828.12	3916.3	3913.45	3483.86	3377.89	3448.99
439	Rbm38	857.895	0.297202	0.0569398	5.21958	1.79332e-07	6.11895e-06	963.038	984.713	1047.02	789.495	753.911	787.584	841.545	869.941	772.96	819.408	816.614	848.508
440	Bpgm	471.943	-0.374256	0.0717984	-5.2126	1.86217e-07	6.33941e-06	370.334	375.722	410.95	516.599	540.85	505.647	525.207	508.597	487.829	490.362	479.07	452.149
441	Id3	2959.24	0.427976	0.0822485	5.20345	1.9562e-07	6.64441e-06	3622.17	3592.51	3780.41	2775.92	2634.59	2546.62	3138.24	2878.22	2689.14	2988	2364.44	2500.56
442	C1rb	117.375	-0.788583	0.152108	-5.18438	2.16735e-07	7.34495e-06	69.3319	78.3497	78.588	157.391	147.504	147.097	123.068	121.144	147.295	107.238	104.924	126.568
443	Crebl2	210.586	-0.500063	0.0966555	-5.17366	2.29548e-07	7.76161e-06	159.802	159.37	161.269	232.279	219.208	237.501	251.337	238.111	243.239	212.643	206.594	205.674
444	Wbp1	351.864	-0.409608	0.0795107	-5.15161	2.58262e-07	8.71284e-06	273.946	287.579	288.156	382.054	352.372	338.63	363.138	365.521	358.102	408.788	397.734	406.351
445	Sumo1	2827.25	-0.398121	0.0773523	-5.14686	2.64884e-07	8.91618e-06	2182.27	2395.01	2271.69	3032.32	3342.41	3115.09	2827.1	2751.85	2871.57	3447.2	2843.51	2846.96
446	Reep3	3955.08	0.299859	0.0583117	5.14236	2.71313e-07	9.11212e-06	4750.93	4590.58	4472.97	3664.42	3592.35	3587.03	3682.52	3493.34	3659.4	3763.41	4085.51	4118.47
447	Prickle3	39.3048	-1.26251	0.245548	-5.14161	2.72393e-07	9.12792e-06	26.2109	15.1357	16.3725	48.2328	43.0221	52.097	52.0007	40.7295	32.4319	37.5791	52.0551	55.79
448	Rnasek	1489.98	0.218172	0.042455	5.13889	2.76365e-07	9.24034e-06	1685.95	1673.83	1639.71	1378.44	1405.39	1434.2	1430.89	1371.23	1420.25	1523.33	1452.66	1463.86
449	Pfn1	24103	0.175246	0.0342041	5.12355	2.99829e-07	1.00025e-05	26563.4	26437.7	26097.8	23569.3	23903.9	23089.7	22848.2	21942.8	22980.7	23741.8	24294.3	23766.5
450	Agrn	122.631	-0.741403	0.144885	-5.11718	3.10146e-07	1.03237e-05	93.0063	78.3497	72.8577	123.121	119.847	128.71	148.202	162.918	167.565	129.236	121.191	126.568
451	Tsen15	561.084	0.368947	0.0722066	5.10961	3.22831e-07	1.06984e-05	633.288	677.547	712.204	520.406	586.945	554.68	515.674	544.104	517.559	494.945	501.03	474.631
452	Mir17hg	96.2278	0.907592	0.177616	5.10986	3.22394e-07	1.06984e-05	179.248	131.77	133.436	74.8878	67.6062	88.8713	89.2679	110.701	55.4045	78.8245	77.2693	67.4476
453	Rnf7	1715.01	0.424231	0.0830388	5.10883	3.24166e-07	1.07189e-05	2129.84	2109.21	2116.97	1650.07	1730.1	1644.12	1698.69	1603.07	1698.62	1457.34	1364.82	1377.26
454	Cdk14	3206.4	0.35395	0.069301	5.10742	3.26581e-07	1.0775e-05	3995.04	3732.3	3760.76	3213.83	3090.42	3295.9	2997.84	3102.75	3070.22	2663.54	2796.34	2757.86
455	Sec13	2773.17	-0.333543	0.0653619	-5.10302	3.34282e-07	1.10048e-05	2247.37	2390.56	2319.98	3089.44	3169.3	3030.82	2991.77	2939.84	3025.62	2787.27	2657.25	2628.79
456	Nxpe5	47.1209	1.18445	0.232948	5.08464	3.6833e-07	1.20992e-05	80.3236	88.1434	75.3135	20.3085	35.8518	26.0485	29.4671	41.7739	60.8098	29.3301	43.1081	34.9728
457	Tbl2	855.377	0.460228	0.0905585	5.08211	3.73268e-07	1.22345e-05	1117.77	1075.53	1037.2	717.145	729.327	772.261	721.943	715.377	754.041	839.573	950.006	834.352
458	Fbxl14	1774.76	-0.33484	0.0659374	-5.07816	3.81108e-07	1.24642e-05	1485.56	1510.9	1456.33	1942	1888.88	1748.31	2097.36	1983.21	1874.29	1772.64	1841.45	1696.18
459	Atp2a2	12006.3	0.162062	0.0319465	5.07292	3.9176e-07	1.27847e-05	13498.6	12641.9	12999	11606.3	11664.1	11502.7	11594.4	11633	11776.8	11186.7	12115	11856.6
460	ENSMUSG00000115423.2	590.764	0.405304	0.0799772	5.06775	4.02554e-07	1.30803e-05	733.904	673.986	763.777	580.063	591.042	519.438	533.007	497.109	514.856	628.763	531.125	522.095
461	Foxred1	770.047	-0.304584	0.0601024	-5.06774	4.02565e-07	1.30803e-05	616.378	679.328	668.817	800.918	881.953	802.906	829.411	767.595	793.23	818.492	759.679	821.862
462	Cad	3416.93	0.248677	0.0490938	5.06533	4.07684e-07	1.3218e-05	3958.69	3827.56	3844.26	3353.45	3393.63	3283.64	3194.58	3315.8	3247.24	2903.68	3365.69	3314.93
463	ENSMUSG00000116563.1	360.344	0.384702	0.0760027	5.06169	4.15565e-07	1.34444e-05	431.211	424.691	456.793	352.861	357.493	307.985	336.271	302.86	321.616	374.875	330.225	327.246
464	Itfg2	338.704	-0.647367	0.127983	-5.05821	4.23203e-07	1.3662e-05	235.052	236.83	239.857	389.67	382.077	387.663	428.139	424.005	414.858	327.213	299.317	299.767
465	Fgf11	511.316	-0.751072	0.148516	-5.05719	4.25477e-07	1.37058e-05	329.75	372.161	311.896	586.409	602.31	536.292	676.876	664.204	672.961	432.618	446.535	503.775
466	Rufy3	803.438	0.277599	0.0548994	5.05651	4.27001e-07	1.37254e-05	966.42	885.886	920.954	832.65	778.496	760.003	749.677	723.732	732.42	784.579	766.186	740.258
467	Rnft1	942.215	0.272243	0.0539344	5.04766	4.47254e-07	1.43457e-05	1094.94	1120.04	1029.01	859.305	871.71	913.229	832.011	889.783	955.389	933.062	897.137	910.959
468	Zfp959	205.446	0.421106	0.083475	5.04469	4.54253e-07	1.4539e-05	264.645	240.391	257.867	192.931	197.697	167.017	190.669	195.293	177.024	201.644	190.326	189.853
469	Avl9	1246.7	-0.277291	0.0549962	-5.042	4.6068e-07	1.47133e-05	1138.06	1053.27	1037.2	1254.05	1246.62	1302.42	1365.89	1285.59	1332.41	1242.86	1296.5	1405.58
470	Pdia4	5145.6	-0.37069	0.0735283	-5.04145	4.6201e-07	1.47243e-05	4271.52	4247.8	4139.79	5124.1	5404.4	5283.25	4999.87	5048.37	5195.86	6001.66	6098.58	5932.06
471	Ubald1	567.444	0.477153	0.0947466	5.0361	4.75107e-07	1.51096e-05	713.612	725.625	723.665	463.289	452.757	430.566	572.874	520.085	524.315	590.267	534.378	557.9
472	Optn	336.759	-0.412813	0.0819848	-5.03524	4.77247e-07	1.51455e-05	304.384	262.65	242.313	369.362	366.712	350.888	368.338	388.497	345.94	346.461	339.172	356.39
473	Numb	1440.07	0.634741	0.126322	5.02479	5.03988e-07	1.59603e-05	2107.01	1898.2	1891.02	1130.93	1002.83	1155.33	1242.82	1086.12	1317.54	1554.49	1464.86	1429.72
474	Myo10	4161.45	0.805005	0.160467	5.01665	5.25806e-07	1.66161e-05	6169.7	5931.43	6280.49	2567.76	2486.06	2857.67	3943.39	3957.03	3960.74	3793.66	3791.89	4197.57
475	Jrk	136.922	-0.558885	0.111443	-5.01498	5.30395e-07	1.67259e-05	101.461	97.9371	103.147	147.237	151.602	140.968	162.936	147.253	168.916	147.567	136.645	137.393
476	Ifi202b	1697.08	-0.625995	0.12485	-5.01396	5.33197e-07	1.67789e-05	1165.96	1278.52	1171.45	2061.32	2328.32	2051.7	1934.43	1854.76	1802.67	1711.23	1529.93	1474.69
477	Ifnar1	2445.5	0.26256	0.0524127	5.00948	5.45783e-07	1.7139e-05	2812.17	2730.67	2846.36	2244.09	2185.93	2258.56	2340.9	2343.51	2187.8	2433.48	2464.48	2498.06
478	Prkar1a	9232	-0.17914	0.0358993	-4.99006	6.03605e-07	1.89151e-05	8637.75	8439.51	8118.31	9505.67	9517.11	9440.28	9897.47	9521.31	9839.02	9525.85	9002.28	9339.41
479	Gpr137b	2096.28	0.425875	0.085361	4.98911	6.06591e-07	1.89689e-05	2599.95	2522.33	2653.16	1859.5	1894	2252.43	2092.16	2010.37	1998.61	1880.79	1623.47	1768.63
480	Arhgap26	247.273	0.444789	0.0893275	4.97931	6.38102e-07	1.99128e-05	323.831	292.031	311.896	222.125	211.013	234.436	217.536	214.091	209.456	219.059	257.835	253.969
481	Wtap	2606.11	0.166177	0.0334245	4.97173	6.63594e-07	2.06652e-05	2820.63	2809.01	2881.56	2596.95	2623.33	2532.83	2496.03	2482.41	2495.9	2446.31	2530.37	2558.01
482	Kctd10	1125.02	0.204588	0.0412385	4.96109	7.00985e-07	2.17521e-05	1249.67	1225.99	1270.51	1089.05	1045.85	1075.65	1111.08	1079.85	1098.63	1099.88	1055.74	1098.31
483	Mir142	32.0295	-1.40444	0.283098	-4.96098	7.01401e-07	2.17521e-05	17.7557	15.1357	10.6421	35.5399	28.6814	29.113	39.8672	39.6852	35.1345	37.5791	57.7486	37.4709
484	Cox20	377.617	-0.370604	0.0747384	-4.95868	7.09729e-07	2.19649e-05	321.294	317.851	289.793	403.632	417.929	395.324	410.806	387.453	398.642	438.118	372.519	378.04
485	Axin1	2088.09	0.197423	0.0398706	4.95158	7.36138e-07	2.27353e-05	2288.8	2318.44	2328.99	1964.85	2037.4	1967.43	2011.56	1945.62	1936.45	2070.52	2126.94	2060.07
486	Lrrc14b	36.319	-1.83131	0.3701	-4.94816	7.49191e-07	2.30908e-05	10.9917	13.3551	13.098	69.8106	47.1195	41.3711	31.2004	22.9756	21.6213	54.0773	57.7486	52.4593
487	Anxa9	93.1523	-0.697088	0.140927	-4.94646	7.55747e-07	2.3245e-05	70.1775	59.6526	61.3969	101.543	111.653	101.129	91.8679	91.9025	93.2416	109.988	121.191	104.086
488	Zdhhc23	14.5227	1.53212	0.310087	4.94092	7.77553e-07	2.38667e-05	36.357	23.1488	26.196	13.9621	14.3407	7.66132	9.53346	9.39912	6.75664	5.49939	9.76033	11.6576
489	A530032D15Rik	89.0509	-0.72384	0.146611	-4.93715	7.92731e-07	2.42829e-05	54.1127	64.1043	60.5783	95.1963	116.774	114.92	97.9347	84.5921	98.647	98.0724	84.5895	99.0897
490	Ino80d	2175.3	-0.398203	0.0807007	-4.93432	8.04291e-07	2.456e-05	1931.15	1692.53	1645.44	2285.98	2178.76	2296.86	2490.83	2559.69	2436.44	1977.95	2246.5	2361.5
491	Gm28006	93.788	0.883077	0.178973	4.93414	8.05059e-07	2.456e-05	164.029	131.77	134.255	71.0799	55.3142	76.6132	71.9343	97.1242	55.4045	90.7399	77.2693	99.9224
492	Map4k4	4657.37	-0.469003	0.0951256	-4.93035	8.20825e-07	2.49901e-05	3663.6	3531.08	3655.16	4715.39	4709.9	4705.58	4757.2	4555.44	4428.3	5644.2	5857.83	5664.77
493	Top3a	521.083	-0.329385	0.0668645	-4.92616	8.38604e-07	2.54796e-05	416.837	456.743	438.783	550.869	588.993	528.631	507.874	534.705	545.937	534.357	588.873	560.398
494	Cotl1	13488.1	0.23953	0.0486494	4.92359	8.49702e-07	2.57646e-05	14733	15511.5	15467.9	12998.7	13084.9	12183	12904	12013.1	13095.7	14062.8	13164.2	12638.5
495	Xpot	4448.51	0.178939	0.0364078	4.91487	8.88428e-07	2.68844e-05	4905.66	4911.99	4815.15	4062.98	4336.02	4212.19	4218.12	4459.36	4213.44	4400.42	4437.7	4409.08
496	Prcp	1246.17	-0.255412	0.0519762	-4.91402	8.92261e-07	2.69459e-05	1061.96	1079.98	1117.42	1342.9	1284.52	1397.42	1209.02	1272.01	1329.71	1245.61	1272.91	1340.63
497	Gstp1	8.33448	-6.17729	1.25729	-4.91317	8.96167e-07	2.70094e-05	0	0	0	10.1543	14.3407	4.59679	8.66678	4.17739	9.4593	15.5816	11.3871	21.6499
498	Acyp2	10.7615	-6.53463	1.33082	-4.91023	9.09694e-07	2.73621e-05	0	0	0	2.53857	2.04867	6.12906	23.4003	18.7982	17.5673	19.2478	23.5875	15.821
499	Actb	134828	0.23597	0.0480878	4.90706	9.24531e-07	2.77526e-05	153762	153645	148698	125758	129258	127412	123810	122362	125401	129600	139638	138597
500	Slc12a9	549.398	0.376368	0.0767185	4.90583	9.30339e-07	2.78711e-05	637.516	701.586	656.538	533.099	488.608	422.905	542.541	479.355	521.613	548.105	522.991	537.916
501	Mtch1	2995.86	0.321836	0.0657201	4.89706	9.72793e-07	2.90848e-05	3387.12	3503.48	3686.27	2697.23	2699.13	2713.64	2801.97	2584.76	2793.2	3224.47	2897.19	2961.87
502	Fbxo18	1280.24	-0.210976	0.0430976	-4.8953	9.81534e-07	2.92876e-05	1151.59	1160.11	1127.25	1336.56	1342.9	1280.97	1303.48	1272.01	1299.98	1363.85	1381.09	1343.12
503	Rundc3b	21.1369	-1.5775	0.322701	-4.88844	1.0164e-06	3.02078e-05	7.6096	10.6841	7.36763	21.5778	28.6814	32.1775	27.7337	20.8869	17.5673	27.4969	25.2142	26.646
504	Eya4	180.558	-0.534131	0.109264	-4.88844	1.01638e-06	3.02078e-05	135.282	159.37	111.333	205.624	178.235	209.92	200.203	191.115	185.132	188.812	196.833	204.841
505	Ccdc174	749.669	-0.437449	0.0895395	-4.88554	1.03144e-06	3.05939e-05	587.631	607.21	580.405	850.42	911.659	810.568	873.612	780.127	848.634	717.67	699.49	728.601
506	Ctsl	11017.3	0.170432	0.0348956	4.88406	1.03922e-06	3.07637e-05	11817.7	11928.7	12325.2	10304	10283.3	10362.7	10839.5	10605.3	10971.4	10685.3	11073.9	11010.6
507	Zfp248	198.811	-0.533698	0.109479	-4.87487	1.08882e-06	3.21051e-05	135.282	146.015	163.725	223.394	224.33	206.856	217.536	232.889	248.644	186.063	190.326	210.67
508	Gm21988	1888.02	0.182885	0.0375158	4.87488	1.08876e-06	3.21051e-05	2088.41	2091.4	2042.47	1790.96	1807.95	1824.93	1824.36	1785.83	1808.08	1944.95	1834.13	1812.76
509	Lpcat3	1820.88	-0.31153	0.0639393	-4.87227	1.10321e-06	3.24655e-05	1472.88	1566.1	1589.77	1717.34	1879.66	1930.65	1834.76	1807.76	1920.24	2019.19	2087.9	2024.26
510	Macrod2	177.088	0.610928	0.125459	4.86955	1.1185e-06	3.28511e-05	258.727	234.159	224.303	129.467	186.429	159.355	137.802	153.519	154.051	190.645	133.391	163.207
511	Fdft1	2468.64	-0.22021	0.0452486	-4.86666	1.13498e-06	3.32699e-05	2121.39	2161.74	2306.07	2464.95	2594.64	2528.24	2596.57	2638.02	2699.95	2405.06	2553.14	2553.85
512	Gm28551	2379.28	-0.308081	0.0633608	-4.86233	1.16011e-06	3.39401e-05	1934.53	2021.07	2097.32	2585.53	2788.24	2641.62	2394.63	2380.07	2512.12	2526.97	2367.69	2301.55
513	Mybl1	419.76	-0.380586	0.0782812	-4.86178	1.16337e-06	3.3969e-05	354.269	338.328	335.636	436.634	442.513	401.453	474.073	499.198	452.695	402.372	463.616	436.328
514	Vegfa	8.02774	-6.08714	1.25332	-4.85682	1.19288e-06	3.47628e-05	0	0	0	10.1543	16.3894	6.12906	13.0002	17.7539	14.8646	7.33251	4.88017	5.82881
515	Ctsz	24888	0.335283	0.0690919	4.85271	1.21784e-06	3.54214e-05	28082	29075.8	31260	22466.3	22062.2	23673.5	22092.5	21428.9	22364.5	25249.5	25162.1	25738.3
516	Adam23	123.256	-1.02744	0.211793	-4.85115	1.22747e-06	3.56323e-05	69.3319	73.898	65.49	130.736	113.701	113.388	113.535	109.656	135.133	204.394	171.619	178.195
517	Ezh2	3039.77	-0.477097	0.0983641	-4.85032	1.23263e-06	3.57129e-05	2464.67	2292.62	2288.06	3429.61	3630.25	3524.21	3453.71	3547.64	3385.08	2707.53	2976.9	2777.01
518	Manba	4311.7	0.145131	0.0299378	4.84775	1.24867e-06	3.60382e-05	4609.73	4653.79	4671.89	4253.37	4268.41	4244.37	4176.52	4042.67	4110.74	4336.27	4138.38	4234.21
519	Clec4d	4946.42	-0.736845	0.151995	-4.84782	1.24825e-06	3.60382e-05	3086.96	3234.6	3570.03	5919.94	6233.09	6456.96	5838.81	5759.57	6417.46	4773.47	3963.51	4102.65
520	Kdm7a	2209.61	-0.437127	0.0901961	-4.8464	1.25721e-06	3.6215e-05	1900.71	1733.49	1606.14	2080.36	2025.11	2289.2	2482.17	2293.38	2464.82	2553.55	2402.67	2683.75
521	Csf1r	30706.7	0.238096	0.0492728	4.83221	1.35026e-06	3.88205e-05	34288	34746.3	34956.9	29072.9	27702.1	27206.9	31321.8	29109.1	30052.2	28875.4	29649.4	31499.7
522	Lgals9	961.406	-0.701752	0.145443	-4.82493	1.40053e-06	4.01889e-05	594.395	669.534	696.65	1265.48	1340.86	1276.38	997.547	1061.06	987.821	853.321	901.204	892.64
523	Foxj2	1299.69	-0.396683	0.0822414	-4.8234	1.41131e-06	4.04208e-05	1047.59	1080.87	1026.56	1232.47	1244.57	1233.47	1444.75	1460	1370.25	1395.01	1514.48	1546.3
524	Dnajc22	271.557	-0.450495	0.0934513	-4.82064	1.431e-06	4.09065e-05	218.987	198.545	221.847	260.203	300.131	309.517	292.937	244.377	290.536	304.299	303.384	313.923
525	Dnajc5	4634.54	0.381008	0.0790608	4.81918	1.44148e-06	4.11275e-05	5644.64	5584.2	5610.04	4112.48	4070.71	4068.16	4056.05	3985.23	4081.01	4611.23	4766.3	5024.43
526	Sh3kbp1	651.429	1.23	0.255362	4.81669	1.45961e-06	4.15655e-05	1181.18	1066.62	1185.37	332.552	309.35	334.034	467.14	408.339	436.479	641.595	710.064	744.422
527	Oaf	33.2387	1.40898	0.292683	4.814	1.47941e-06	4.20495e-05	70.1775	56.0913	60.5783	39.3478	25.6084	15.3226	14.7335	25.0643	21.6213	36.6626	20.334	13.323
528	Gmfg	1163.62	-1.03319	0.215001	-4.80549	1.5437e-06	4.37937e-05	604.541	719.393	631.16	1483.79	1621.52	1530.73	1657.09	1587.41	1454.03	952.31	900.391	821.029
529	Washc2	4884.21	-0.254455	0.0530332	-4.79803	1.60233e-06	4.5371e-05	4443.16	4097.33	4254.4	5249.76	5341.91	5531.47	4947	5091.19	5093.16	4701.97	4937.1	4922.01
530	Copz2	104.309	-0.615083	0.128272	-4.79515	1.62552e-06	4.5941e-05	82.8601	74.7884	66.3087	115.505	103.458	119.517	112.668	107.568	110.809	120.986	108.177	129.066
531	Fam126b	570.533	-0.487296	0.101715	-4.7908	1.66121e-06	4.6861e-05	461.649	455.853	397.033	661.297	642.259	583.793	664.742	640.184	679.718	486.696	564.473	608.694
532	Unc50	873.156	-0.348448	0.0727595	-4.78904	1.67583e-06	4.71846e-05	721.221	740.761	713.023	870.729	900.392	897.907	1002.75	869.941	960.794	1050.38	854.842	895.138
533	Rps6ka1	2953.53	-0.228093	0.0477016	-4.78166	1.73852e-06	4.87665e-05	2629.54	2583.76	2635.15	3145.29	3006.43	3066.06	3202.38	3189.43	3206.7	2832.18	2905.33	3040.14
534	Plau	4839.28	0.618572	0.129354	4.782	1.7356e-06	4.87665e-05	6868.09	6909.02	5886.73	3656.81	4027.69	3364.85	4057.79	4153.37	3947.23	5025.52	5027.38	5146.84
535	Pgbd1	6.57835	-5.83105	1.22156	-4.77345	1.81098e-06	5.07039e-05	0	0	0	8.88499	12.292	4.59679	6.93343	8.35477	8.10797	9.16564	8.94697	11.6576
536	Tpra1	918.785	-0.350452	0.0734533	-4.77109	1.8323e-06	5.12015e-05	755.887	768.361	762.14	924.039	821.518	954.601	1063.41	946.178	1029.71	982.557	1006.13	1010.88
537	Tpm1	1715.89	0.189408	0.0397021	4.77073	1.83558e-06	5.12015e-05	1912.55	1829.64	1930.32	1623.41	1714.74	1637.99	1614.62	1621.87	1662.13	1629.65	1692.6	1721.16
538	Ctsh	247.621	-1.76497	0.370056	-4.76946	1.84718e-06	5.14292e-05	83.7056	88.1434	93.3233	291.935	266.327	275.808	475.806	439.67	506.748	163.148	123.631	163.207
539	Setmar	100.572	-0.751759	0.157733	-4.76602	1.87902e-06	5.22186e-05	52.4217	78.3497	67.9459	124.39	118.823	116.452	118.735	109.656	128.376	86.157	109.804	95.759
540	Dfna5	201.122	-0.715053	0.150112	-4.76346	1.90298e-06	5.25389e-05	148.81	126.428	133.436	213.24	229.451	185.404	184.602	189.027	206.753	252.055	258.649	285.612
541	Rmnd5a	3984.09	-0.426233	0.0894819	-4.76334	1.90414e-06	5.25389e-05	3294.96	3170.49	3035.46	4231.79	4176.22	4187.68	4596.86	4648.39	4949.91	3598.43	3816.29	4102.65
542	Capg	20846	-0.293625	0.061644	-4.76324	1.90507e-06	5.25389e-05	17148.7	17854.8	18479.6	21350.6	20654.7	22214.8	20953.7	19994	23072.6	24476.8	21443.4	22508.4
543	Fam103a1	705.762	-0.280722	0.058939	-4.76292	1.90808e-06	5.25389e-05	599.468	632.14	591.866	713.338	764.155	750.809	785.211	749.841	733.771	757.999	702.744	687.799
544	Gse1	933.721	-0.321724	0.0675467	-4.76298	1.90752e-06	5.25389e-05	771.107	785.278	805.527	907.538	936.243	979.117	936.879	949.311	955.389	1014.64	1073.64	1089.99
545	Ppfia4	708.881	-0.564753	0.118673	-4.75891	1.94639e-06	5.34955e-05	527.599	513.725	521.464	902.461	865.564	793.713	870.145	774.905	799.986	658.093	634.422	644.499
546	Gstz1	348.244	-0.459863	0.096759	-4.75267	2.00747e-06	5.50732e-05	297.62	252.856	262.779	396.017	421.002	375.405	376.138	398.94	393.236	340.045	333.478	331.409
547	Gm19680	82.9771	-0.765441	0.161123	-4.75067	2.02748e-06	5.55203e-05	56.6493	48.0782	58.1224	100.273	117.799	85.8068	102.268	92.9468	90.539	76.9914	82.1495	84.1014
548	Scaf8	2240.25	0.214282	0.0451245	4.74869	2.04734e-06	5.59619e-05	2623.62	2419.05	2459.15	2068.93	2148.03	2062.43	2145.9	2117.93	2183.75	2128.26	2231.86	2294.05
549	Tshz1	333.22	-0.931059	0.196127	-4.74723	2.06226e-06	5.6267e-05	195.313	192.313	207.112	393.478	342.128	315.646	517.407	488.754	468.911	276.802	298.503	302.265
550	Spg11	1255.38	-0.244344	0.0514945	-4.74505	2.08452e-06	5.67649e-05	1105.93	1110.25	1092.86	1236.28	1307.05	1342.26	1207.28	1275.15	1308.09	1373.93	1363.19	1342.29
551	Pon2	2621.84	0.732447	0.154371	4.74471	2.08809e-06	5.67649e-05	3831.86	3610.32	3768.95	2495.41	2421.53	2302.99	2677.17	2493.9	2699.95	1676.4	1731.65	1751.97
552	Sema4c	1404.63	-0.487943	0.102914	-4.74127	2.12383e-06	5.76319e-05	1111	1059.5	1069.12	1436.83	1312.17	1279.44	1556.55	1489.24	1433.76	1860.63	1584.43	1662.88
553	4930430E12Rik	393.801	-0.753629	0.159002	-4.73974	2.13995e-06	5.79644e-05	244.353	265.321	268.509	486.136	481.438	540.889	431.606	463.69	512.153	300.633	359.506	371.378
554	Pigt	3367.82	0.256121	0.0540616	4.73757	2.16299e-06	5.84828e-05	3718.56	3990.49	3805.79	3062.78	3130.37	3035.42	3302.04	3118.42	3143.19	3235.47	3575.53	3295.77
555	Plxnb3	36.2106	-1.13527	0.239866	-4.73296	2.2127e-06	5.9719e-05	16.0647	18.6971	22.1029	45.6942	30.7301	50.5647	38.1338	33.4191	44.5938	52.2442	41.4814	40.8016
556	Mad2l1	4090.62	-0.403991	0.0854057	-4.73025	2.24241e-06	6.0412e-05	3327.93	3279.11	3267.95	4560.54	4865.6	4563.08	4454.73	4536.64	4553.98	4206.11	3924.47	3547.25
557	Tcea1	4611.8	-0.436558	0.0923171	-4.7289	2.25744e-06	6.07076e-05	3612.03	3638.81	3683	5419.84	5587.75	5454.86	5016.33	5028.53	4895.86	4507.66	4339.28	4157.6
558	Pdcd2	500.912	0.289804	0.0613034	4.72737	2.27447e-06	6.10561e-05	593.549	559.132	584.498	489.944	513.192	496.454	445.473	452.202	471.614	476.613	462.802	465.472
559	Arfgef2	3657.96	0.256212	0.0543038	4.71812	2.38031e-06	6.37829e-05	4214.03	4040.35	4242.12	3557.8	3462.26	3554.85	3653.05	3740.85	3481.02	3094.32	3425.88	3429
560	Thumpd3	921.143	-0.365161	0.0774446	-4.71512	2.41567e-06	6.46149e-05	739.823	788.839	741.675	1031.93	1085.8	1015.89	1026.15	985.863	986.47	878.069	893.07	880.15
561	Slc13a2	21.7817	-2.89088	0.613595	-4.71139	2.46033e-06	6.56923e-05	5.07307	4.45169	1.63725	40.6171	49.1681	45.9679	22.5336	28.1974	29.7292	10.9988	13.0138	9.99224
562	Fam135a	844.881	-0.483692	0.10275	-4.70746	2.50825e-06	6.67337e-05	673.027	657.069	618.881	1002.73	1001.8	1075.65	911.746	903.36	890.525	741.5	831.255	831.021
563	Asnsd1	2535.12	-0.300931	0.0639252	-4.70755	2.5071e-06	6.67337e-05	2072.35	2166.19	2236.48	2770.85	2985.94	2807.11	2541.1	2531.5	2647.25	2683.7	2510.85	2468.08
564	Akr1b10	1102.7	-0.255915	0.0543995	-4.70436	2.54663e-06	6.76347e-05	922.453	1003.41	958.61	1209.63	1196.42	1176.78	1133.62	1094.48	1199.98	1121.87	1146.84	1068.34
565	Acox1	1342.35	0.286091	0.0608994	4.69776	2.63035e-06	6.97346e-05	1574.34	1485.97	1592.23	1158.86	1227.15	1343.8	1291.35	1331.54	1363.49	1159.45	1280.23	1299.82
566	Prkd3	1724.62	0.589907	0.125666	4.69424	2.67595e-06	7.0818e-05	2468.89	2216.05	2232.39	1332.75	1181.06	1254.92	1615.49	1531.01	1706.73	1631.48	1756.86	1767.79
567	Rad51ap1	993.826	-0.246449	0.0525085	-4.69351	2.68558e-06	7.09477e-05	850.585	919.719	845.64	1037	1046.87	1066.46	1072.95	1076.72	986.47	1034.8	971.153	1017.54
568	Slc24a3	38.1189	0.825982	0.176019	4.69256	2.6981e-06	7.10279e-05	54.9583	55.2009	59.7596	38.0785	33.8031	32.1775	29.4671	28.1974	25.6752	37.5791	31.7211	30.8094
569	Agap3	1312.53	0.291536	0.0621258	4.69266	2.6967e-06	7.10279e-05	1472.04	1571.45	1521.01	1142.36	1186.18	1179.84	1267.08	1278.28	1387.81	1325.35	1227.36	1191.57
570	Msto1	1104.59	0.242401	0.0517046	4.6882	2.75622e-06	7.24306e-05	1178.64	1266.06	1300.8	1083.97	1074.53	1120.09	1072.95	1030.77	1018.9	1072.38	1050.05	985.901
571	Cbx3	4067.26	-0.317081	0.0677268	-4.68177	2.84411e-06	7.46092e-05	3503.8	3454.51	3340.81	4542.77	4815.4	4662.68	4128.86	4130.39	4136.42	3960.47	4072.5	4058.51
572	Hist1h1d	144.693	0.676202	0.144695	4.67329	2.9641e-06	7.7621e-05	211.378	212.791	181.735	126.928	109.604	99.5972	158.602	147.253	110.809	115.487	112.244	149.884
573	Blvrb	1495.44	-0.426928	0.0913626	-4.6729	2.96983e-06	7.76354e-05	1004.47	1249.14	1311.44	1544.72	1480.17	1539.93	1742.02	1646.93	1759.43	1709.39	1438.84	1518.82
574	Man2c1	680.295	-0.409163	0.0876137	-4.67008	3.01086e-06	7.85708e-05	505.616	594.745	541.111	694.298	689.378	615.97	767.877	761.329	698.637	795.578	693.797	805.208
575	Ska1	485.269	-0.280955	0.0602787	-4.66093	3.14784e-06	8.20026e-05	414.301	411.336	425.685	500.098	503.973	524.034	507.007	524.262	524.315	517.859	479.07	491.285
576	Amotl1	265.866	0.769991	0.165372	4.65611	3.22239e-06	8.3799e-05	361.033	381.955	415.862	199.278	194.624	206.856	194.136	178.583	197.294	291.467	291.183	278.117
577	Cd37	1168.25	-0.215063	0.0462299	-4.65204	3.28666e-06	8.53221e-05	1026.45	1000.74	1098.6	1228.67	1150.33	1218.15	1238.48	1198.91	1228.36	1224.53	1182.63	1223.22
578	Wtip	552.759	-0.511165	0.109957	-4.64877	3.33925e-06	8.65374e-05	407.537	409.555	440.42	596.563	550.069	470.405	641.342	626.608	731.069	645.261	554.712	559.565
579	Aoah	379.881	-0.572652	0.123266	-4.64565	3.39015e-06	8.77048e-05	278.173	257.308	300.435	369.362	319.593	349.356	462.806	461.601	439.182	417.037	444.908	458.81
580	Fam83h	331.815	-0.406192	0.0875095	-4.64169	3.45574e-06	8.92475e-05	246.889	287.579	265.235	383.324	354.42	321.775	371.805	328.969	405.398	338.212	335.105	343.067
581	Cspp1	653.588	-0.334863	0.0721736	-4.63969	3.48934e-06	8.99601e-05	565.647	560.913	515.734	619.411	696.549	723.229	697.676	711.2	606.746	683.757	736.092	726.103
582	Top2a	19066.7	-0.162656	0.0351131	-4.63233	3.6157e-06	9.27958e-05	18193.7	17430.1	16881.7	19765.3	19727.7	19124.2	19721.3	19508.4	19247	18762.1	20453.6	19985.3
583	Iqgap2	43.4129	1.63625	0.353232	4.63224	3.61738e-06	9.27958e-05	76.096	95.2661	93.3233	24.1164	24.5841	21.4517	46.8006	49.0843	41.8912	14.665	19.5207	14.1557
584	1110038B12Rik	710.776	0.643577	0.138935	4.63221	3.61791e-06	9.27958e-05	930.908	942.867	1050.3	517.868	490.657	536.292	608.408	634.963	579.72	780.913	698.677	757.745
585	Ccdc115	1685.03	-0.456232	0.0985964	-4.62726	3.70528e-06	9.45934e-05	1232.76	1335.51	1381.84	1943.27	1946.24	1918.39	2001.16	1859.98	1918.89	1606.74	1555.96	1519.65
586	Kntc1	1371.83	-0.270466	0.0584557	-4.62686	3.71249e-06	9.45934e-05	1216.69	1217.98	1130.52	1424.14	1528.31	1415.81	1489.82	1536.23	1378.35	1307.02	1398.17	1418.9
587	Crbn	1640.54	-0.306313	0.0662037	-4.62682	3.71326e-06	9.45934e-05	1399.32	1399.61	1381.02	1712.26	1899.12	1745.25	1536.62	1696.02	1641.86	1896.37	1718.63	1660.38
588	Cep83os	113.097	-0.775309	0.167555	-4.62718	3.70685e-06	9.45934e-05	80.3236	66.7753	73.6763	99.0041	128.042	130.242	159.469	143.075	151.349	106.321	109.804	109.082
589	Tmcc1	577.654	-0.366059	0.0791231	-4.62645	3.71984e-06	9.46001e-05	498.852	438.046	485.445	585.14	609.48	635.89	681.209	633.918	660.799	559.104	566.913	577.052
590	Mrps9	1250	-0.423963	0.091675	-4.62463	3.75267e-06	9.52733e-05	1028.99	939.306	1014.28	1356.86	1491.43	1463.31	1384.09	1406.73	1358.08	1158.54	1284.3	1114.13
591	Mfsd9	128.067	-0.583089	0.126115	-4.62348	3.7735e-06	9.564e-05	85.3967	112.183	81.8625	148.506	122.92	160.888	143.869	129.499	139.187	130.152	137.458	144.887
592	Gars	6919.11	-0.248706	0.0538082	-4.62208	3.79919e-06	9.61285e-05	6233.96	5837.05	6115.95	7365.65	7845.39	7596.97	6913.49	6921.93	7160.69	6626.76	7315.37	7096.16
593	Clec4a3	561.202	-0.641581	0.139051	-4.61399	3.95012e-06	9.97789e-05	377.944	388.187	418.318	706.991	674.013	614.438	734.943	671.515	659.448	477.53	516.484	494.616
594	Gpr137b-ps	2030.93	0.353483	0.0766291	4.61291	3.97073e-06	0.000100131	2361.51	2449.32	2462.43	1999.12	1908.34	2122.19	2011.56	1927.86	1994.56	1686.48	1664.14	1783.61
595	Hspb6	138.736	-0.693506	0.150387	-4.61147	3.99832e-06	0.000100657	98.0793	90.8144	97.4164	132.006	155.699	116.452	160.335	137.854	148.646	157.649	203.34	166.537
596	Ogg1	425.37	-0.479749	0.104045	-4.61096	4.0081e-06	0.000100734	311.148	330.315	342.185	493.751	473.243	444.357	545.141	452.202	497.289	402.372	396.92	415.511
597	Dennd2a	459.989	-0.553659	0.120098	-4.61006	4.02552e-06	0.000101002	355.115	331.206	333.181	481.059	571.58	566.938	510.474	523.218	567.558	388.623	422.948	467.97
598	Bach1	1862.71	0.253276	0.0549975	4.60523	4.1202e-06	0.000103205	2156.05	2136.81	2068.67	1731.3	1701.42	1711.54	1811.36	1661.56	1728.35	1864.29	1823.56	1957.65
599	Fgfr1op2	2812.57	-0.366334	0.0796043	-4.60194	4.1858e-06	0.000104673	2292.18	2377.2	2261.86	3234.14	3115.01	3112.03	3199.78	3023.38	3171.57	2697.45	2646.68	2619.63
600	Atxn1l	3539.22	-0.188934	0.0410631	-4.60106	4.20341e-06	0.000104938	3240.85	3231.93	3138.61	3616.19	3553.42	3444.53	3774.38	3683.41	3882.37	3557.19	3604	3743.76
601	Snrpa1	2067.64	0.319183	0.0695242	4.59097	4.41194e-06	0.000109961	2508.63	2403.02	2371.56	2060.05	2159.3	2178.88	1823.49	1814.03	1860.78	1842.29	1924.41	1865.22
602	Csnk2a1	4273.45	0.252204	0.0550469	4.58163	4.61374e-06	0.000114799	5111.96	4780.22	4685.81	3839.58	3955.99	4092.68	4003.19	3878.7	3941.82	4295.94	4253.06	4442.38
603	Cbx2	213.188	-0.595776	0.13008	-4.58009	4.64786e-06	0.000115457	157.265	157.59	149.808	176.43	217.159	191.533	254.803	246.466	227.023	261.221	272.476	246.475
604	Rtkn2	52.6326	-0.999354	0.21822	-4.57956	4.65946e-06	0.000115553	32.1294	26.7101	31.9264	46.9635	74.7765	41.3711	57.2008	78.326	60.8098	50.411	60.1887	70.7784
605	Luc7l2	5835.78	-0.376953	0.0823217	-4.57903	4.67146e-06	0.000115659	5087.44	4712.56	4501.62	6314.69	6143.97	6521.32	6713.29	6811.23	6562.05	5341.74	5714.67	5604.81
606	Tm9sf4	2678.23	0.20442	0.0446544	4.57782	4.69848e-06	0.000116136	3000.72	2996.88	2927.4	2475.1	2580.3	2436.3	2567.1	2528.36	2632.39	2526.05	2703.61	2764.52
607	Ppp4r1	2473.17	0.232486	0.0508036	4.57618	4.73549e-06	0.000116858	2923.78	2682.59	2741.58	2358.33	2435.87	2410.25	2459.63	2476.15	2441.85	2191.51	2241.62	2314.87
608	Cpne8	2763.04	0.696354	0.15228	4.57284	4.81157e-06	0.00011854	4154.84	3765.24	3704.28	2750.54	2773.9	2969.53	2554.97	2385.29	2516.17	1754.3	1912.21	1915.18
609	Rab28	979.422	-0.312943	0.0684524	-4.57169	4.83795e-06	0.000118995	776.18	866.298	840.728	1063.66	1067.36	1126.21	1036.55	945.134	1058.09	1066.88	948.379	957.59
610	Mkln1	2534.53	-0.38247	0.0836763	-4.57082	4.85811e-06	0.000119294	2072.35	2049.56	2068.67	2860.97	2729.86	2805.58	2883.44	2852.11	2917.52	2242.83	2403.48	2528.04
611	Mtdh	9510.1	0.181115	0.0396325	4.56987	4.88024e-06	0.000119642	10601	10513.1	10191.1	9166.77	9050.01	9089.39	8753.45	9096.26	8880.93	9733.91	9461.01	9584.22
612	Prss16	107.352	-0.916913	0.200705	-4.56845	4.91342e-06	0.000120258	65.1044	71.227	58.1224	123.121	101.409	98.0649	113.535	91.9025	101.35	162.232	144.778	157.378
613	Samd11	73.0923	-0.868477	0.190126	-4.5679	4.92641e-06	0.00012038	36.357	49.8589	48.2989	93.927	89.1173	99.5972	94.4679	78.326	86.485	65.0761	75.6426	59.9534
614	Ppm1l	318.69	0.698255	0.152925	4.566	4.97108e-06	0.000121273	442.203	453.182	450.244	233.548	239.695	263.549	260.003	238.111	216.213	331.796	331.851	363.884
615	Snhg1	881.432	0.403784	0.0885293	4.56103	5.09043e-06	0.000123983	1080.56	1105.8	1055.21	775.532	805.128	733.955	762.677	856.364	713.501	983.473	856.469	848.508
616	Fcgr2b	7709.38	-0.416457	0.0913609	-4.55837	5.15518e-06	0.000125356	5939.72	6322.29	6229.74	7721.05	7450	7054.54	8408.51	7804.4	7887.7	9317.79	9484.6	8892.26
617	Zfp120	1351.35	0.405334	0.0890107	4.55377	5.26936e-06	0.000127925	1656.36	1731.71	1583.22	1128.39	1251.74	1109.36	1174.35	1178.02	1214.84	1489.42	1362.38	1336.46
618	Lactb2	1644.04	-0.372426	0.0818115	-4.55224	5.3077e-06	0.000128647	1297.01	1335.51	1403.12	1792.23	1856.1	1956.7	1767.16	1818.21	1833.75	1564.58	1550.27	1553.79
619	Gm22489	95.8942	0.736482	0.161833	4.55088	5.34218e-06	0.000129258	135.282	138.002	139.166	71.0799	64.5332	95.0004	75.401	88.7694	55.4045	90.7399	104.924	92.4282
620	Gm1848	22.498	1.24387	0.273345	4.55057	5.35016e-06	0.000129258	43.1211	32.9425	40.9313	16.5007	17.4137	29.113	15.6002	13.5765	21.6213	13.7485	17.0806	8.32687
621	Kctd5	1118.28	0.399299	0.0877825	4.54873	5.39699e-06	0.00013018	1326.61	1394.27	1380.2	978.618	1002.83	1038.88	917.812	963.932	933.768	1169.54	1134.64	1178.25
622	Slc35g1	1074.66	0.338493	0.0744536	4.54636	5.4582e-06	0.000131444	1326.61	1183.26	1310.62	1090.31	1074.53	1049.6	1062.55	1031.81	974.308	900.983	897.137	994.228
623	H2afx	2204.94	0.253204	0.0557852	4.53891	5.65447e-06	0.000135952	2408.86	2520.55	2599.95	2120.97	1985.16	1889.28	2172.76	2056.32	2102.67	2155.76	2222.92	2224.11
624	Pyroxd2	267.16	-0.714256	0.157393	-4.53803	5.6782e-06	0.000136304	181.785	186.081	175.186	279.242	216.135	219.114	318.071	352.989	266.212	342.795	329.411	338.903
625	Prkar2b	181.626	-0.49765	0.109753	-4.53426	5.78058e-06	0.00013854	135.282	138.002	143.259	171.353	174.137	179.275	201.069	222.446	224.32	207.144	202.527	180.693
626	Nrp1	5751.68	-0.202658	0.0446992	-4.53382	5.79273e-06	0.000138609	5288.67	4968.97	5241.66	5872.98	5954.47	5828.73	6189.82	6207.6	6264.76	5570.88	5756.16	5875.44
627	Mrpl30	1336.54	-0.299606	0.0661395	-4.52991	5.90082e-06	0.00014097	1135.52	1167.23	1116.6	1374.63	1527.29	1342.26	1416.15	1272.01	1413.49	1560.91	1388.41	1323.97
628	Osbpl8	13887	-0.256761	0.0566911	-4.52913	5.92283e-06	0.000141271	12799.4	12471	11080.9	14009.1	13337.9	14596.3	14649.5	14425.6	15238.9	13932.7	14771.4	15331.4
629	Zfp422	974.506	-0.481409	0.106319	-4.52796	5.95545e-06	0.000141823	770.261	786.168	700.743	892.307	967.998	900.971	1053.01	1013.02	1022.96	1188.78	1238.75	1159.1
630	Ank2	282.7	0.535294	0.118353	4.52288	6.10051e-06	0.000145047	375.407	389.078	342.185	256.395	215.111	203.791	314.604	264.22	285.13	262.137	257.022	227.323
631	Rgs12	149.537	-0.548651	0.121461	-4.51709	6.26958e-06	0.00014883	103.998	118.415	110.514	135.813	171.064	176.21	140.402	155.608	174.321	168.648	152.099	187.355
632	Akap13	3744.49	-0.291303	0.0646349	-4.5069	6.57822e-06	0.00015591	3341.46	3133.99	3141.07	4158.17	4236.65	4183.08	3852.39	4009.25	3736.42	3443.53	3797.58	3900.3
633	Mrps35	772.653	-0.273835	0.0607689	-4.50616	6.60109e-06	0.000156205	661.19	681.108	660.631	819.957	892.197	853.471	769.61	790.57	752.69	784.579	823.935	781.893
634	Zfp251	537.279	0.351132	0.077939	4.50522	6.63051e-06	0.000156654	658.654	605.43	659.812	495.021	419.978	493.389	493.14	503.375	529.721	539.856	499.404	549.573
635	Dmxl2	296.339	0.488068	0.108352	4.50447	6.65401e-06	0.000156961	388.935	384.626	363.47	248.78	246.865	232.904	257.403	266.308	247.293	286.885	290.37	342.234
636	Lgals3bp	4075.56	-0.482583	0.107142	-4.50413	6.66455e-06	0.000156963	2988.88	3131.32	3297.42	4789.01	4581.86	4682.6	4827.4	4613.92	4878.29	3606.68	3810.6	3698.79
637	Strap	7019.89	-0.342487	0.0760724	-4.50211	6.72807e-06	0.00015821	5748.63	5756.92	6025.9	7949.53	8076.89	7960.11	7422.23	7550.62	7782.3	6649.67	6678.51	6637.35
638	Ptpn14	68.1471	-9.18212	2.03978	-4.50153	6.74646e-06	0.000158394	0	0	0	7.6157	7.17035	10.7258	3.46671	2.08869	2.70266	271.303	185.446	327.246
639	Cenpa	2078.95	-0.183446	0.0407682	-4.49973	6.80408e-06	0.000159496	1811.09	1933.81	1916.4	2204.75	2097.84	2097.67	2133.76	2266.23	2113.48	2162.17	2131.01	2079.22
640	Jarid2	1109.22	0.302252	0.0671897	4.49848	6.84417e-06	0.000160186	1336.75	1229.56	1313.89	990.041	984.387	948.472	1106.75	1118.5	1106.74	1002.72	1034.6	1138.28
641	Gm11451	30.3885	1.07785	0.23971	4.49648	6.90873e-06	0.000161444	49.8852	45.4072	55.6665	24.1164	15.365	26.0485	17.3336	25.0643	21.6213	18.3313	33.3478	32.4748
642	Sdr42e1	153.06	-0.484181	0.107711	-4.49521	6.95016e-06	0.00016216	110.762	125.538	117.882	161.199	156.723	154.759	189.803	163.962	174.321	149.4	169.992	162.374
643	D5Ertd605e	47.238	-1.28353	0.285615	-4.49392	6.99255e-06	0.00016239	21.1378	22.2584	24.5588	64.7335	83.9956	73.5487	32.9338	40.7295	40.5398	50.411	52.0551	59.9534
644	Gcfc2	659.174	-0.27277	0.0606967	-4.49399	6.99019e-06	0.00016239	596.086	575.158	541.93	732.377	691.427	645.083	678.609	652.717	664.853	692.006	730.398	709.449
645	Anks1	751.61	0.326742	0.0727018	4.49428	6.98067e-06	0.00016239	893.706	892.118	870.199	704.453	646.356	744.68	745.343	796.836	736.474	656.26	640.928	691.963
646	Atg16l1	1029.62	0.313493	0.0697955	4.49159	7.0693e-06	0.000163918	1192.17	1200.18	1231.21	864.382	905.513	911.697	940.346	977.508	978.362	1070.55	1045.98	1037.53
647	Gm25789	20.8543	1.28306	0.285909	4.48766	7.20094e-06	0.000166712	33.8205	38.2845	40.9313	7.6157	10.2434	12.2581	14.7335	12.5322	21.6213	13.7485	21.1474	23.3152
648	Shq1	404.981	-0.342158	0.0762896	-4.48499	7.29174e-06	0.000168554	311.994	323.193	374.112	416.325	432.27	448.953	401.272	446.98	447.29	442.701	407.494	407.184
649	Eif5b	4465.39	-0.341926	0.0762752	-4.48279	7.36724e-06	0.000170037	3991.66	3639.7	3523.36	4962.9	5097.1	5054.94	4783.2	4746.55	4912.08	4042.05	4357.17	4474.03
650	Ncoa2	2073.16	-0.454663	0.101542	-4.47761	7.5485e-06	0.000173952	1743.44	1535.83	1586.5	2296.13	2269.93	2223.32	2476.1	2575.36	2348.61	1808.38	2000.05	2014.27
651	Scly	1653.6	-0.422418	0.0943737	-4.47602	7.60473e-06	0.000174711	1329.99	1296.33	1322.9	1906.46	1850.98	1903.07	1836.49	1899.67	1918.89	1526.08	1553.52	1498.84
652	Sash3	89.4812	-1.55305	0.346963	-4.47613	7.60084e-06	0.000174711	35.5115	40.0652	34.3823	105.351	103.458	84.2745	72.801	48.0399	66.2151	162.232	174.059	147.386
653	Bcl7a	288.189	-0.722805	0.16183	-4.46645	7.95299e-06	0.000182432	208.841	195.874	175.186	378.247	341.104	349.356	364.872	354.033	349.994	227.308	258.649	254.802
654	Rrp8	1068.43	0.206159	0.0461646	4.46573	7.97958e-06	0.000182762	1249.67	1141.41	1168.18	1040.81	1065.31	1031.21	1006.21	1045.39	1027.01	985.307	1024.83	1035.86
655	Treml2	67.0349	1.31228	0.29391	4.46491	8.01009e-06	0.00018318	120.908	119.305	126.068	39.3478	37.9004	44.4357	31.2004	38.6408	27.0266	64.1595	82.1495	73.2764
656	Lrfn4	253.767	-0.606632	0.135991	-4.46082	8.1645e-06	0.000186427	144.582	180.739	221.029	281.781	235.597	258.953	305.071	330.013	312.157	251.139	264.342	259.798
657	Ncoa3	12386.1	0.376086	0.084364	4.45789	8.27686e-06	0.000188654	15642.8	14946.1	14299.7	10444.9	10484.1	10235.5	11435.8	11640.3	11198.5	12207.7	13104.9	12992.4
658	Aebp2	2534.4	-0.243791	0.0546909	-4.45763	8.28721e-06	0.000188654	2364.05	2187.56	2128.43	2585.53	2556.74	2653.88	2795.9	2820.78	2694.55	2432.56	2586.49	2606.31
659	Pcdhb16	140.582	-1.30338	0.292606	-4.45438	8.41343e-06	0.000191236	60.8768	86.3627	53.2106	189.123	153.65	177.743	228.803	212.002	221.618	113.654	101.67	88.2648
660	Tbc1d9b	2058.42	-0.286802	0.0644204	-4.45203	8.50607e-06	0.000193049	1746.83	1832.31	1718.29	2153.97	2064.04	2240.17	2257.7	2272.5	2378.34	2021.02	1970.77	2045.08
661	Mvb12a	1186.69	-0.303469	0.0681737	-4.45141	8.53091e-06	0.000193053	950.355	1024.78	1052.75	1219.78	1247.64	1236.54	1252.35	1168.62	1299.98	1424.34	1156.6	1206.56
662	Alg10b	5707.17	0.241004	0.0541492	4.45073	8.5578e-06	0.000193053	6786.08	6497.68	6074.2	5362.72	4978.27	5375.18	5621.28	5582.03	5479.64	5226.25	5713.05	5789.67
663	Klhdc3	1788.92	0.385117	0.0865191	4.45124	8.53753e-06	0.000193053	2129.84	2178.66	2207.83	1573.91	1536.5	1449.52	1666.62	1567.56	1574.3	1934.87	1847.96	1799.44
664	Pcdhgb5	163.586	-0.542277	0.121834	-4.45095	8.54927e-06	0.000193053	119.217	117.525	126.887	194.2	184.381	212.985	196.736	162.918	178.375	153.066	161.859	154.88
665	Tst	36.5463	-0.989894	0.222543	-4.4481	8.66351e-06	0.000195144	21.1378	17.8068	23.7401	33.0014	44.0465	44.4357	46.8006	45.9512	48.6478	34.8294	39.8547	38.3036
666	Calcrl	354.805	0.951189	0.214126	4.4422	8.90435e-06	0.000199967	640.052	560.913	465.798	269.088	315.496	326.372	364.005	343.59	368.913	171.398	215.541	216.499
667	Ceacam1	408.382	0.550378	0.123894	4.44234	8.8985e-06	0.000199967	574.102	519.957	515.734	330.014	334.958	355.485	305.071	321.659	354.048	399.622	429.455	460.476
668	Fbxw11	3719.21	-0.154653	0.0348416	-4.43874	9.04854e-06	0.000202901	3418.4	3474.99	3386.65	3896.7	3866.87	3924.13	3881.85	3786.8	3847.23	3655.26	3644.67	3847.01
669	Ranbp3	1836.19	0.326624	0.0735922	4.4383	9.06703e-06	0.000203012	2084.19	2201.8	2216.02	1634.84	1665.57	1509.28	1692.62	1723.17	1655.38	1874.37	1825.18	1951.82
670	Atp6v1g1	2848.69	-0.207366	0.0467453	-4.43607	9.16144e-06	0.00020482	2571.2	2487.6	2595.86	2925.7	2807.71	3047.67	3002.17	2986.83	3016.16	3110.82	2723.13	2909.41
671	Memo1	1549.73	0.27193	0.0613398	4.43318	9.28534e-06	0.00020728	1778.11	1771.77	1787.06	1506.64	1665.57	1478.63	1397.95	1415.09	1367.54	1566.41	1433.96	1428.06
672	Carf	105.952	-0.645175	0.145567	-4.43216	9.32927e-06	0.000207893	79.4781	74.7884	69.5832	126.928	98.3363	111.855	120.468	112.789	114.863	96.2392	120.377	145.72
673	Fam57a	219.957	0.401444	0.0905805	4.4319	9.34053e-06	0.000207893	273.1	277.785	255.411	205.624	208.965	214.517	177.669	226.623	187.835	209.893	215.541	186.522
674	Prrc2b	4657.39	-0.238018	0.0537471	-4.42848	9.4898e-06	0.000210902	4251.23	4089.32	3972.79	4771.24	4869.69	4920.1	4994.67	5148.63	5026.94	4315.18	4676.01	4852.9
675	E2f2	1316.46	-0.19423	0.0438804	-4.42634	9.58475e-06	0.000212696	1153.28	1214.42	1197.65	1306.09	1383.88	1333.07	1417.02	1404.65	1378.35	1358.35	1317.64	1333.13
676	Ddhd2	1157.17	0.206327	0.0466879	4.41929	9.9026e-06	0.000219425	1282.64	1262.5	1306.53	1106.82	1084.77	1179.84	1064.28	1091.34	1175.66	1069.63	1137.08	1124.96
677	Plekhb2	4407.89	-0.252949	0.0573016	-4.41434	1.0132e-05	0.000223515	3747.31	3894.34	3916.3	4565.61	4613.61	4673.41	4802.26	4613.92	5074.24	4331.68	4153.83	4508.17
678	Xkr5	228.73	-0.480614	0.108864	-4.4148	1.01102e-05	0.000223515	178.403	177.177	171.093	262.742	273.498	292.662	233.136	253.776	243.239	231.891	211.474	215.666
679	Gm8822	1612.55	0.274961	0.0622853	4.41454	1.01226e-05	0.000223515	1838.99	1833.21	1893.48	1534.56	1608.21	1475.57	1441.29	1458.95	1402.68	1614.99	1703.99	1544.63
680	Zfp960	21.3924	1.35771	0.307648	4.41319	1.01858e-05	0.000224372	29.5929	51.6396	38.4754	15.2314	15.365	7.66132	11.2668	20.8869	8.10797	24.7472	17.0806	16.6537
681	Vat1	1502.07	-2.90445	0.658832	-4.40847	1.04102e-05	0.000228978	245.198	263.54	259.504	2768.31	2687.86	3179.45	416.872	379.098	505.397	2488.47	2354.68	2476.41
682	Rcbtb2	1824.52	-0.24722	0.0561399	-4.40363	1.06453e-05	0.000233806	1568.42	1631.1	1600.41	2054.97	1791.56	1900.01	1852.09	1714.82	1925.64	1986.19	1946.37	1922.67
683	Fth1	62828.1	-0.333629	0.0757877	-4.40215	1.07184e-05	0.000235068	52132.6	49867.8	55705	71266.5	73089.5	74423.6	64038	62223.2	65952.9	60784.7	62923.2	61530.5
684	Coro1b	2116.61	-0.314691	0.0715106	-4.40062	1.07941e-05	0.000236381	1719.77	1866.15	1780.51	2381.18	2392.85	2232.51	2393.77	2211.93	2272.93	2170.42	1947.19	2030.09
685	Arl6ip5	3352.08	-0.598711	0.136227	-4.39495	1.108e-05	0.000242288	2439.3	2413.71	2401.85	3970.32	4104.52	4092.68	4043.05	3927.79	4152.63	2848.68	2943.55	2886.92
686	Bphl	256.39	-0.373895	0.0851306	-4.39202	1.12302e-05	0.000245214	202.923	210.12	218.573	264.011	272.473	265.082	268.67	265.264	244.59	277.719	306.637	280.615
687	Crebzf	1174.67	0.405724	0.0924527	4.38845	1.14164e-05	0.000248916	1491.48	1378.24	1451.42	1040.81	931.122	1009.76	1031.35	1090.3	1027.01	1302.44	1133.01	1209.06
688	Gm8818	66.515	-1.47701	0.336651	-4.38737	1.14728e-05	0.000249783	26.2109	39.1749	20.4656	106.62	74.7765	61.2906	65.0009	40.7295	45.9452	95.3227	126.884	95.759
689	Mob1a	14725.7	-0.268857	0.0613011	-4.38584	1.15537e-05	0.000251179	13009	12631.2	12648.6	16218.9	16180.4	16067.3	15798.7	15586.9	16106.5	14480.8	13653.9	14326.4
690	Chrnb2	139.358	-0.85311	0.194577	-4.38444	1.16287e-05	0.000252444	86.2422	85.4724	87.5929	173.892	156.723	196.13	178.536	186.938	174.321	103.572	116.311	126.568
691	Wsb1	2577.28	0.203195	0.0463591	4.38306	1.17022e-05	0.000253304	2931.39	2928.32	2721.11	2373.56	2401.04	2454.69	2519.43	2696.5	2416.17	2507.72	2501.9	2475.58
692	Dynlt1a	316.47	0.691884	0.157847	4.38326	1.16915e-05	0.000253304	419.374	459.414	453.518	266.55	250.962	243.63	267.804	238.111	198.645	362.043	361.132	276.452
693	Gm29170	95.2211	0.695639	0.158789	4.38091	1.18186e-05	0.000255456	144.582	131.77	126.068	71.0799	59.4115	82.7423	73.6677	86.6808	71.6204	91.6564	96.79	106.584
694	BC004004	1312.02	0.23391	0.0534527	4.37603	1.20862e-05	0.000260863	1453.43	1429.88	1552.93	1274.36	1265.06	1156.86	1283.55	1189.51	1289.17	1343.68	1287.55	1218.22
695	Paox	571.036	-0.649485	0.148636	-4.36963	1.24457e-05	0.000268236	393.163	406.884	399.489	718.415	744.692	697.18	701.143	677.781	643.232	493.112	500.217	477.129
696	Cpsf1	3548.22	0.132681	0.030404	4.36393	1.27744e-05	0.000274926	3798.88	3884.54	3711.65	3373.76	3481.72	3545.66	3474.51	3517.36	3475.62	3357.37	3486.07	3471.47
697	Acy1	1028.82	0.289476	0.0664618	4.35553	1.32745e-05	0.000285278	1124.53	1229.56	1215.66	1045.89	1035.6	1074.12	995.813	919.025	922.957	953.227	906.897	922.617
698	Rpe	1936.05	-0.37512	0.0861502	-4.35425	1.33523e-05	0.00028613	1556.59	1623.98	1566.03	2239.02	2252.52	2293.8	2023.69	2071.98	2087.8	1963.28	1788.58	1765.3
699	Klhl18	500.044	-0.354311	0.0813678	-4.35444	1.33409e-05	0.00028613	410.073	409.555	418.318	564.831	550.069	562.341	516.54	576.479	544.585	467.448	516.484	463.806
700	Gmcl1	725.114	-0.23002	0.0528562	-4.3518	1.35023e-05	0.00028893	658.654	628.578	636.891	737.454	739.571	798.31	750.543	721.643	754.041	769.914	724.705	781.06
701	Gm12366	64.5334	1.1448	0.26338	4.34658	1.38275e-05	0.000295467	103.998	144.235	82.6812	41.8864	39.9491	27.5808	39.8672	43.8626	45.9452	65.9926	62.6288	75.7745
702	Foxm1	3214.9	-0.49483	0.113877	-4.34531	1.3908e-05	0.000296764	2444.37	2416.38	2517.27	3720.27	3675.32	3672.84	3771.78	3875.57	3770.21	2621.37	3092.4	3001
703	Atp9a	235.281	-0.696221	0.160322	-4.34265	1.40773e-05	0.000299948	145.428	175.396	159.632	340.168	293.984	304.921	221.003	204.692	254.05	276.802	204.154	243.145
704	Ms4a7	98.811	-0.771811	0.177884	-4.33884	1.43237e-05	0.000304765	51.5762	73.0077	69.5832	92.6577	94.2389	124.113	133.468	97.1242	94.593	143.901	106.55	104.919
705	Ppil1	1096.4	0.224288	0.0517235	4.3363	1.44901e-05	0.000307869	1206.54	1247.36	1237.76	1067.47	1045.85	1022.02	1022.68	1001.53	1006.74	1078.8	1151.72	1068.34
706	Zfp862-ps	189.996	-0.484101	0.11169	-4.33431	1.46217e-05	0.000310225	161.493	129.099	148.99	187.854	177.21	214.517	203.669	200.515	185.132	227.308	230.995	213.168
707	Gstm5	476.908	-0.595813	0.13776	-4.325	1.52529e-05	0.000323159	310.303	349.903	374.93	487.405	482.462	494.921	455.873	425.049	494.586	699.338	566.913	581.215
708	Akap1	1054.55	0.226318	0.0523508	4.32311	1.53843e-05	0.000325483	1225.99	1169.9	1149.35	1016.7	1018.19	1072.58	1000.15	1071.5	1027.01	944.978	956.513	1001.72
709	Syt11	699.867	-0.276769	0.0640299	-4.32249	1.54278e-05	0.000325941	588.476	608.101	613.15	764.109	732.4	720.164	724.543	766.55	790.527	649.844	701.117	739.426
710	Rps6ka3	3080.37	0.750309	0.173622	4.32152	1.54958e-05	0.000326918	4682.44	4473.06	4128.33	2165.4	2117.3	2132.91	2392.03	2396.78	2294.56	3095.24	3457.6	3628.85
711	Dguok	192.726	-0.44145	0.102164	-4.32101	1.5532e-05	0.000327221	159.802	162.932	134.255	208.163	206.916	216.049	226.203	213.047	171.619	197.978	200.087	215.666
712	Mapk14	5163.72	0.176237	0.0407968	4.31986	1.56126e-05	0.000328457	5825.57	5462.22	5668.98	5042.86	4817.45	4868	4904.53	4831.15	5025.59	5004.44	5207.95	5305.88
713	Maip1	518.373	-0.283783	0.0657486	-4.31619	1.58745e-05	0.000333498	459.958	435.375	438.783	530.561	578.75	580.728	494.873	549.326	563.504	520.608	539.258	528.756
714	Rhbdd2	337.87	-0.382107	0.0887058	-4.30758	1.6505e-05	0.000346258	264.645	272.443	289.793	401.094	356.469	330.969	352.738	342.546	336.481	332.713	414.001	360.553
715	Pde4a	730.175	-0.308319	0.0716976	-4.30028	1.70586e-05	0.000357371	663.727	626.798	569.763	747.608	703.719	737.019	790.411	855.32	756.744	731.418	807.667	771.901
716	Yes1	56.7519	-1.25556	0.292097	-4.29842	1.72017e-05	0.000358864	29.5929	32.9425	20.4656	96.4656	62.4845	70.4842	74.5343	80.4147	81.0797	50.411	47.1749	34.9728
717	Fyco1	299.042	-0.347793	0.0809027	-4.2989	1.71646e-05	0.000358864	248.58	251.966	243.132	326.206	283.741	350.888	296.404	309.127	309.454	315.298	313.144	340.569
718	Fam19a5	61.61	1.2172	0.283155	4.2987	1.71802e-05	0.000358864	93.8518	114.854	113.789	39.3478	43.0221	38.3066	77.1344	60.5721	62.1611	41.2454	31.7211	23.3152
719	Chd1	4515.75	0.277023	0.064453	4.29806	1.723e-05	0.000358954	5473	5025.96	5095.12	4112.48	4279.68	4327.11	4059.52	4118.9	3926.96	4341.76	4662.19	4766.3
720	Pcdhb22	76.5582	1.85229	0.431301	4.29466	1.74963e-05	0.000363995	191.086	160.261	152.264	21.5778	13.3164	19.9194	44.2006	39.6852	47.2965	80.6577	61.0021	87.4321
721	Ms4a6c	65.9384	-1.33941	0.312057	-4.2922	1.76915e-05	0.000367547	25.3653	28.4908	37.6568	100.273	95.2633	98.0649	86.6678	90.8581	87.8363	32.9963	54.4952	53.2919
722	Zfp638	2493.38	-0.204001	0.0475404	-4.2911	1.77787e-05	0.000368845	2376.73	2172.42	2165.26	2707.38	2489.14	2597.19	2713.57	2614	2495.9	2508.64	2484.82	2595.48
723	M1ap	150.555	-0.652818	0.152155	-4.29048	1.78287e-05	0.000369372	107.38	102.389	104.784	189.123	208.965	182.339	169.002	147.253	182.429	134.735	134.205	144.055
724	Gm45799	477.323	0.291942	0.0680782	4.28833	1.80023e-05	0.000372453	526.754	574.268	556.665	472.174	416.905	484.195	463.673	469.956	439.182	472.947	414.001	437.161
725	Fkbp9	1154.57	-0.773278	0.180404	-4.28638	1.81612e-05	0.000375223	760.96	729.186	769.508	1596.76	1616.4	1547.59	1383.22	1268.88	1349.98	961.476	917.471	953.426
726	Retreg1	5655.16	-0.238828	0.0557362	-4.28497	1.82765e-05	0.000377085	5095.05	5060.68	4788.14	6219.49	6340.64	6127.52	5952.35	5562.19	5866.12	5782.6	5364.93	5702.24
727	Ergic2	2364.15	-0.214053	0.0500064	-4.28051	1.86462e-05	0.000384183	2123.08	2141.26	2064.57	2480.18	2602.84	2577.27	2431.9	2480.32	2414.82	2486.64	2293.68	2273.23
728	Mkrn2	821.49	-0.309294	0.0722619	-4.28019	1.86737e-05	0.000384223	687.401	673.986	724.483	964.656	926	877.987	851.078	837.566	913.498	789.162	806.854	805.208
729	Dusp2	99.3383	1.31507	0.307289	4.27958	1.87245e-05	0.000384739	197.85	170.054	175.186	44.4249	49.1681	42.9034	73.6677	57.4391	51.3505	123.736	114.684	91.5955
730	Plekhg3	1085.35	-0.56505	0.132256	-4.2724	1.93378e-05	0.000396797	777.025	837.808	779.331	1161.39	1122.67	1126.21	1389.29	1465.22	1385.11	1000.89	980.913	998.391
731	Fitm2	480.541	0.263942	0.0617983	4.27102	1.94579e-05	0.000398715	543.664	537.764	565.67	462.019	477.341	432.098	469.74	465.779	485.127	454.616	419.694	452.982
732	Zfp637	262.422	-0.363517	0.0851364	-4.26982	1.95629e-05	0.000400317	232.516	215.462	199.745	288.127	298.082	254.356	271.27	288.24	298.644	262.137	277.356	263.129
733	Mrps10	1007.04	0.235215	0.05512	4.26732	1.97833e-05	0.000404276	1091.56	1124.5	1191.1	991.311	932.146	939.278	936.013	912.759	947.281	1038.47	1018.33	961.753
734	Rbsn	1434.41	-0.253317	0.059432	-4.2623	2.02337e-05	0.000412916	1259.81	1282.98	1214.84	1460.95	1573.38	1575.17	1518.42	1502.81	1620.24	1420.67	1403.86	1379.76
735	Mfsd7b	2453.6	0.178545	0.0418989	4.26133	2.03211e-05	0.000413701	2692.11	2744.91	2631.06	2254.25	2389.78	2353.56	2461.37	2482.41	2383.74	2241.92	2376.64	2431.45
736	Adh7	31.7673	-1.66643	0.391092	-4.26097	2.0354e-05	0.000413701	8.45512	14.2454	13.098	54.5792	45.0708	53.6292	37.2672	42.8182	49.9991	19.2478	21.1474	21.6499
737	Suclg1	3130.12	-0.200705	0.0471032	-4.26096	2.0355e-05	0.000413701	2827.39	2744.91	2868.46	3258.25	3496.06	3381.71	3146.04	3148.7	3204	3286.8	3165.6	3033.48
738	Sh3d19	72.714	-1.22972	0.288634	-4.26048	2.03985e-05	0.000414023	43.1211	32.9425	31.9264	106.62	111.653	102.662	97.068	92.9468	97.2956	49.4945	59.3754	47.4631
739	Kif4	2014.13	-0.281841	0.0661891	-4.25812	2.06151e-05	0.000417854	1751.05	1729.93	1719.11	2185.71	2216.66	2120.65	2192.7	2127.33	2098.61	1757.97	2146.46	2123.35
740	Gbgt1	67.7655	-1.10164	0.258808	-4.25657	2.07587e-05	0.000419969	25.3653	47.1879	37.6568	54.5792	50.1925	59.7583	103.135	78.326	74.323	92.573	95.1632	94.9263
741	Jaml	133.825	-0.647027	0.152024	-4.25609	2.08036e-05	0.000419969	95.5428	98.8275	87.5929	198.008	159.796	144.033	135.202	131.588	110.809	142.984	136.645	164.872
742	Nt5dc3	692.662	0.285894	0.0671724	4.25613	2.07997e-05	0.000419969	776.18	810.207	815.351	670.182	730.352	684.922	611.875	632.874	602.692	615.931	668.583	692.795
743	Stag1	3829.72	-0.367911	0.086465	-4.25503	2.09025e-05	0.000421397	3382.05	3059.2	2990.44	4348.57	4416.94	4062.03	4292.66	4342.39	4282.36	3602.1	3636.54	3541.42
744	Mapkbp1	312.646	0.371736	0.0873783	4.25433	2.09673e-05	0.00042157	417.683	366.819	344.641	324.937	291.936	280.404	304.204	304.949	298.644	273.136	287.93	256.467
745	Nub1	1880.02	-0.201417	0.0473424	-4.25447	2.09549e-05	0.00042157	1708.78	1673.83	1686.37	2002.93	1999.5	1985.81	1838.22	1784.79	1933.75	1988.94	1948	2009.27
746	Sept9	2827.66	-0.301211	0.0708398	-4.252	2.11875e-05	0.000425425	2406.33	2400.35	2415.76	3012.01	3182.61	3023.16	3126.98	3068.29	3148.59	2508.64	2862.22	2777.01
747	Pigf	431.595	0.432422	0.101889	4.24407	2.19504e-05	0.000440155	521.681	542.216	542.749	389.67	413.832	436.695	352.738	356.122	355.399	496.778	377.399	393.861
748	Meis3	121.539	-0.545297	0.128579	-4.24095	2.22579e-05	0.000445723	82.8601	99.7178	88.4115	137.083	114.726	122.581	124.802	124.277	156.754	150.317	120.377	136.561
749	Fnbp1l	1534.96	0.630313	0.148682	4.23934	2.2418e-05	0.00044833	2133.23	2144.82	1987.62	1500.29	1431	1556.78	1515.82	1461.04	1567.54	1014.64	1048.42	1058.34
750	Ipo8	3429.39	-0.234127	0.0552462	-4.23789	2.25632e-05	0.000450631	3146.15	2941.68	2996.17	3659.35	3835.11	3678.97	3616.65	3672.97	3540.48	3239.14	3342.91	3483.13
751	Epdr1	70.151	-0.701739	0.165631	-4.23676	2.26768e-05	0.000452297	47.3486	48.9686	47.4803	68.5413	65.5575	76.6132	74.5343	67.8825	83.7823	75.1583	94.3499	91.5955
752	Stt3b	4415.99	0.134827	0.0318456	4.23378	2.29794e-05	0.000457724	4863.38	4580.79	4756.21	4340.95	4361.62	4267.36	4309.12	4124.12	4278.3	4329.85	4402.72	4377.43
753	Tex2	729.528	-0.27573	0.0652108	-4.22829	2.35475e-05	0.000468417	597.777	675.766	617.244	720.953	727.279	789.116	755.744	784.304	779.716	699.338	805.227	801.877
754	Snord22	103.325	0.555253	0.131332	4.22787	2.35919e-05	0.000468677	141.2	132.66	136.71	90.1192	94.2389	78.1455	84.9345	88.7694	75.6744	96.2392	117.124	104.086
755	Slc50a1	450.501	-0.307849	0.0728259	-4.22719	2.36624e-05	0.000469456	375.407	389.968	383.935	463.289	441.489	473.47	460.206	446.98	445.938	494.945	510.791	519.596
756	Hoxa3	22.8621	-1.44718	0.342386	-4.22676	2.37085e-05	0.000469748	5.91858	13.3551	10.6421	38.0785	39.9491	22.984	22.5336	29.2417	20.2699	21.081	21.1474	29.144
757	Il18rap	1176.15	-0.933354	0.220901	-4.22521	2.38722e-05	0.000472367	672.182	722.954	703.199	1189.32	1088.87	1152.26	1010.55	952.444	1077.01	1894.54	1684.47	1965.97
758	Cyb5r3	4695.69	-0.220973	0.0523227	-4.22328	2.40775e-05	0.0004758	4121.02	4166.78	4239.66	4692.54	4874.82	5082.52	5105.6	4744.47	5299.91	4504	4654.86	4862.06
759	Plcg2	4728.3	-0.242125	0.0573776	-4.21985	2.44469e-05	0.000482464	4204.73	4020.76	4245.39	5176.14	5059.2	5183.65	5025	4995.11	4944.51	4299.6	4747.59	4837.91
760	Ctc1	674.343	-0.281351	0.0666822	-4.21929	2.45076e-05	0.000483026	561.42	593.855	585.317	766.647	744.692	730.89	704.609	698.668	658.097	641.595	669.396	736.928
761	Map1s	1087.56	0.245265	0.0581769	4.21585	2.48834e-05	0.000489789	1182.03	1211.75	1302.43	990.041	960.827	1012.83	1093.75	1086.12	1113.49	998.138	1048.42	1050.85
762	Lipn	39.3145	0.875814	0.207766	4.21538	2.49353e-05	0.000490166	65.1044	54.3106	58.1224	31.7321	25.6084	42.9034	24.267	27.153	40.5398	38.4957	24.4008	39.1363
763	Erfe	47.4041	-1.05635	0.250842	-4.2112	2.54018e-05	0.00049868	25.3653	31.1618	21.2843	55.8485	68.6305	68.9519	38.1338	49.0843	75.6744	45.8282	43.9215	44.9651
764	Satb2	479.657	-0.430579	0.102307	-4.2087	2.56845e-05	0.000503004	418.528	380.174	341.367	531.83	536.752	520.97	534.741	557.681	554.045	403.288	500.217	476.297
765	Tmem127	1617.19	0.206472	0.0490589	4.20866	2.56892e-05	0.000503004	1779.8	1808.28	1805.89	1452.06	1470.95	1561.38	1583.42	1556.08	1558.08	1650.73	1523.43	1656.21
766	D430042O09Rik	475.792	-0.277862	0.0660864	-4.20453	2.61626e-05	0.000511604	422.756	414.897	397.033	468.366	470.17	473.47	526.074	520.085	482.424	494.028	518.111	522.095
767	Prpf40b	114.129	-0.66327	0.157764	-4.20419	2.6202e-05	0.000511708	92.1608	72.1173	75.3135	123.121	118.823	111.855	122.202	134.721	86.485	142.984	140.711	149.051
768	Ints13	1275.17	-0.244024	0.0580949	-4.20043	2.66406e-05	0.000519596	1150.74	1068.41	1138.71	1340.36	1385.93	1314.68	1378.89	1386.89	1394.57	1283.19	1228.18	1231.54
769	Gtf2h5	1103.3	0.316385	0.0753332	4.19981	2.67142e-05	0.000520354	1231.91	1284.76	1362.19	1116.97	1095.02	1147.67	972.413	926.335	1048.63	1095.29	1016.7	941.769
770	Sdccag8	258.372	-0.383889	0.0914921	-4.19587	2.71826e-05	0.00052879	203.768	219.913	207.931	309.705	236.622	265.082	290.337	281.974	254.05	270.386	267.596	293.106
771	Mir5117	27.1365	1.13374	0.270407	4.19271	2.75646e-05	0.000535525	53.2672	40.0652	45.843	17.77	13.3164	15.3226	22.5336	16.7095	17.5673	23.8307	22.7741	36.6382
772	Reep6	53.75	-0.960865	0.229245	-4.19144	2.77189e-05	0.000537826	32.1294	29.3811	31.9264	77.4263	78.8739	67.4196	58.0674	66.8382	66.2151	42.162	50.4284	44.1324
773	Hyou1	7643.11	0.11929	0.0284665	4.19053	2.78303e-05	0.000539288	8270.79	8108.3	8007.79	7388.5	7596.48	7201.64	7455.17	7708.32	7460.68	7619.4	7564.26	7335.97
774	Cdkn2aipnl	3023.39	-0.302319	0.0722067	-4.18685	2.82849e-05	0.000547391	2511.17	2636.29	2574.58	3126.25	3237.93	3125.82	2951.04	2878.22	3041.84	3741.42	3247.75	3208.34
775	Vamp8	2648.99	-0.308247	0.073662	-4.18461	2.85655e-05	0.000552106	2140.84	2272.14	2325.71	3025.97	2932.67	2958.8	2848.77	2674.57	2856.71	2827.6	2505.97	2418.12
776	Epb41l2	5331.77	0.192016	0.0459065	4.18276	2.87995e-05	0.000555912	6004.82	6001.77	5644.42	4975.59	5179.04	5111.63	5078.74	4969	4910.73	5244.58	5599.99	5260.91
777	Rab12	1563.22	0.255847	0.0611911	4.18111	2.90085e-05	0.000559226	1864.35	1769.99	1706.83	1477.45	1443.29	1520.01	1338.15	1447.46	1498.62	1483	1635.67	1573.78
778	Mmel1	12.1206	-2.98656	0.714445	-4.18025	2.91189e-05	0.000560632	2.53653	2.67101	0.818625	5.07714	5.12168	9.19358	20.8003	16.7095	10.8106	24.7472	21.1474	25.8133
779	Eefsec	806.517	-0.306867	0.0734283	-4.17914	2.92615e-05	0.000562655	682.328	680.218	690.101	946.886	828.688	824.358	877.945	860.541	886.471	738.751	881.683	780.227
780	Pea15a	6895.76	0.19746	0.0473678	4.16866	3.06402e-05	0.00058841	7455.72	7778.88	7647.6	6361.65	6469.71	6420.19	6921.29	6968.92	7166.09	6745.91	6353.98	6459.15
781	Rasa3	2895.21	-0.167838	0.0402776	-4.16704	3.08583e-05	0.00059184	2691.26	2659.44	2599.95	2905.39	3111.93	2877.59	3103.58	2988.92	3089.14	2922.01	2862.22	2931.06
782	Adk	804.538	0.201133	0.0482924	4.1649	3.11492e-05	0.000596655	895.397	890.338	888.208	770.455	812.299	782.987	747.943	769.683	764.852	810.243	775.133	746.92
783	Slc30a7	1708.44	0.223772	0.053754	4.1629	3.14235e-05	0.000601139	1989.49	1945.39	1814.89	1625.95	1520.11	1556.78	1731.62	1627.09	1614.84	1658.06	1661.7	1755.3
784	Enpp4	456.179	-0.926499	0.222663	-4.16099	3.16866e-05	0.0006054	289.165	267.101	259.504	585.14	577.726	608.309	599.741	613.031	656.745	350.128	326.158	341.402
785	Cops7a	1491.81	-0.377649	0.0908001	-4.15912	3.19472e-05	0.000609602	1193.86	1219.76	1238.58	1698.3	1653.28	1742.18	1689.16	1668.87	1628.35	1352.85	1490.08	1326.47
786	Epha4	35.1172	-1.01363	0.243774	-4.15806	3.20961e-05	0.000611664	22.8288	15.1357	21.2843	52.0406	30.7301	49.0325	31.2004	41.7739	32.4319	39.4123	44.7349	40.8016
787	Rinl	953.496	-0.354026	0.0851803	-4.1562	3.23586e-05	0.000614321	767.724	812.878	784.243	1057.31	1024.34	983.714	1094.61	1052.7	1140.52	884.484	875.176	964.251
788	D16Ertd472e	199.586	-0.54179	0.130355	-4.15626	3.23501e-05	0.000614321	160.647	156.699	130.161	225.933	225.354	197.662	184.602	183.805	199.997	239.223	224.488	266.46
789	Cdc42bpg	526.098	-0.470536	0.11321	-4.1563	3.23439e-05	0.000614321	363.57	425.581	433.053	620.68	556.215	609.841	602.341	654.805	591.882	486.696	486.39	482.126
790	Eya3	1811.15	0.192116	0.0462391	4.15484	3.25513e-05	0.000617198	2003.86	1964.97	2020.37	1823.96	1739.32	1792.75	1857.29	1763.9	1760.78	1682.81	1657.63	1666.21
791	Mertk	1045.09	-0.924186	0.222483	-4.15397	3.26762e-05	0.000618518	632.443	623.236	617.244	1457.14	1413.58	1392.83	1449.09	1336.76	1295.92	690.173	853.216	779.395
792	Vamp1	340.039	-0.51086	0.122987	-4.15377	3.27035e-05	0.000618518	289.165	256.417	230.034	340.168	304.228	341.695	365.738	340.457	340.535	408.788	431.081	432.164
793	Tbc1d2	363.356	-0.377621	0.0909175	-4.15345	3.27505e-05	0.000618626	290.856	296.482	305.347	337.63	374.907	364.679	371.805	356.122	386.48	411.537	416.441	447.985
794	Slc29a1	1861.04	0.313192	0.0754238	4.15242	3.28972e-05	0.000620614	2137.45	2196.46	2205.38	1773.19	1771.08	1702.35	1933.56	1969.64	1810.78	1540.74	1707.24	1584.6
795	Rnf41	706.232	0.267646	0.0644615	4.15203	3.29539e-05	0.000620902	802.39	786.168	841.547	635.911	634.064	643.551	697.676	643.317	668.907	748.833	659.636	712.78
796	Rhob	3934.89	0.488905	0.117795	4.15048	3.31775e-05	0.000624329	5068	5183.55	4802.06	3222.71	3146.76	2873	3542.98	3432.77	3406.7	4314.27	3969.2	4256.69
797	Ndufs8	1955.37	-0.266552	0.0643177	-4.1443	3.40855e-05	0.000640611	1631.84	1719.24	1736.3	2175.55	2242.27	2140.57	1985.56	1947.71	2086.45	1982.53	1991.11	1825.25
798	Rnf128	936.296	0.764739	0.184638	4.14183	3.44553e-05	0.000646749	1340.14	1238.46	1484.99	786.956	714.987	836.616	577.208	560.814	677.015	991.722	950.819	1075.83
799	Gm7432	19.8714	1.01629	0.245486	4.13992	3.47426e-05	0.000651327	28.7474	31.1618	36.8381	16.5007	11.2677	12.2581	15.6002	17.7539	13.5133	21.081	17.0806	16.6537
800	Vmp1	2430.19	0.30598	0.0739196	4.13935	3.48284e-05	0.000652118	2802.87	2912.29	2799.7	2230.13	2168.52	2204.93	2247.3	2079.29	2156.72	2648.87	2435.2	2476.41
801	Arhgef4	57.4497	-0.992971	0.239932	-4.13855	3.49508e-05	0.000653593	26.2109	34.7232	38.4754	55.8485	39.9491	47.5002	85.8012	83.5477	71.6204	64.1595	69.949	71.6111
802	Hal	854.03	0.495828	0.119855	4.13691	3.52016e-05	0.000656644	1033.22	981.152	1257.41	819.957	823.566	968.391	725.41	707.023	852.688	714.92	636.862	727.768
803	Ddr1	8.68682	-5.2314	1.26454	-4.13699	3.51897e-05	0.000656644	0	0	0.818625	17.77	6.14602	13.7904	24.267	11.4878	6.75664	9.16564	4.88017	9.15955
804	Sac3d1	201.15	0.382851	0.0925821	4.13525	3.54562e-05	0.00066057	235.898	262.65	234.945	178.969	163.894	180.807	190.669	176.495	187.835	204.394	208.22	189.02
805	Ift172	432.603	-0.375279	0.0907607	-4.13482	3.55228e-05	0.000660988	340.741	386.406	336.455	437.903	415.881	409.115	442.873	431.315	498.64	486.696	518.924	486.289
806	Ada	670.861	0.245342	0.0593464	4.13407	3.56394e-05	0.000662336	703.466	793.291	785.062	644.796	659.673	651.212	653.475	605.721	606.746	618.681	662.889	665.317
807	Vwf	74.3646	-0.945826	0.228841	-4.1331	3.57897e-05	0.000664306	43.1211	52.5299	36.8381	79.9649	68.6305	68.9519	64.1342	66.8382	81.0797	115.487	106.55	108.249
808	Slc2a3	2153.53	-0.569375	0.137776	-4.13261	3.58664e-05	0.000664904	1600.55	1587.47	1550.48	2712.46	2632.54	2649.28	2538.5	2553.43	2422.93	1710.31	1931.73	1952.65
809	Gm37988	2065.46	-0.329552	0.0797522	-4.1322	3.59312e-05	0.000665283	1749.36	1728.15	1715.84	2349.44	2469.67	2420.98	2102.56	2031.25	2062.13	2173.17	2058.62	1924.34
810	Gm22744	40.5313	0.745705	0.180848	4.12339	3.73338e-05	0.000690399	53.2672	70.3367	51.5734	34.2707	33.8031	26.0485	32.9338	38.6408	39.1885	32.9963	33.3478	39.969
811	Tpp2	6605.19	-0.447455	0.108554	-4.12195	3.75678e-05	0.000693869	5423.11	5137.25	5006.71	7889.87	7966.26	7607.69	7375.43	7457.68	7449.87	5670.78	5903.37	6374.22
812	Mir7657	67.3889	0.79612	0.19325	4.11964	3.79472e-05	0.000700013	99.7704	106.841	87.5929	60.9256	43.0221	59.7583	56.3341	64.7495	89.1877	45.8282	46.3616	48.2958
813	Slc5a6	326.874	0.430051	0.104473	4.1164	3.84839e-05	0.000708685	388.935	399.762	424.048	307.167	310.374	326.372	329.338	318.526	325.67	241.973	248.888	301.433
814	Mlkl	938.289	-0.309709	0.0752409	-4.11623	3.85119e-05	0.000708685	796.472	807.536	783.424	920.231	1095.02	1061.86	977.613	955.577	874.309	911.981	1069.57	1005.89
815	R3hdm1	3379.76	0.27392	0.0665736	4.11455	3.87942e-05	0.000713004	4246.16	3765.24	3642.06	2923.16	3021.79	3173.32	3190.24	3353.4	3218.86	3109.9	3468.98	3443.99
816	Ctse	26.7023	-2.03768	0.495313	-4.11392	3.88993e-05	0.000713185	10.1461	6.23236	7.36763	41.8864	45.0708	58.226	31.2004	40.7295	37.8372	13.7485	13.8271	14.1557
817	Cript	886.977	0.383888	0.0933121	4.11402	3.88833e-05	0.000713185	1067.88	1046.15	1105.96	904.999	851.223	928.552	794.744	786.393	945.93	776.33	700.304	735.262
818	Thoc6	607.74	0.31586	0.0768248	4.11143	3.93211e-05	0.000720037	668.8	738.09	735.126	571.178	542.898	519.438	552.074	534.705	568.909	659.926	588.873	612.857
819	1810032O08Rik	133.999	0.502467	0.122375	4.10595	4.02653e-05	0.000736426	188.549	159.37	171.093	118.043	108.58	101.129	130.868	122.189	99.9983	144.817	130.951	132.397
820	Ralbp1	2378.01	0.184402	0.0449209	4.10503	4.04261e-05	0.000738467	2605.87	2656.77	2581.13	2217.44	2280.17	2267.75	2198.76	2208.79	2321.58	2317.99	2437.64	2442.27
821	Cntrob	368.724	-0.402693	0.0981078	-4.10459	4.05026e-05	0.000738962	303.539	321.412	268.509	373.169	350.323	360.082	442.006	439.67	363.507	410.621	422.134	369.713
822	Lipt1	109.423	-0.557372	0.13583	-4.10347	4.07008e-05	0.000741675	72.714	75.6787	93.3233	143.429	130.091	125.646	115.268	110.701	104.052	104.488	124.444	113.245
823	Rnf167	471.852	-0.309548	0.0755244	-4.09865	4.15569e-05	0.000756225	434.593	377.503	388.847	482.328	461.976	461.212	500.94	530.528	513.505	523.358	461.176	526.258
824	Timm9	445.02	0.348293	0.0849826	4.09841	4.16002e-05	0.000756225	557.192	541.325	490.357	456.942	466.073	407.582	401.272	429.226	428.371	400.539	408.307	353.059
825	Arvcf	212.289	-0.719407	0.175637	-4.09599	4.20373e-05	0.000763245	114.99	156.699	157.995	232.279	249.938	239.033	196.736	175.45	181.078	292.384	260.276	290.608
826	Phc2	2887.47	-0.190009	0.0463958	-4.09539	4.21461e-05	0.000764294	2558.52	2632.73	2642.52	3064.05	3013.6	2856.14	3112.24	2983.7	3166.16	2766.19	2906.95	2946.88
827	Synpo	11.9241	-4.21486	1.02977	-4.09301	4.25811e-05	0.000771248	0.845512	0.890338	0.818625	13.9621	12.292	12.2581	8.66678	2.08869	4.05398	32.0797	27.6543	27.4787
828	Igsf6	1175.76	0.693539	0.169509	4.09145	4.28693e-05	0.00077553	1658.89	1583.02	1697.01	1122.05	1103.21	1144.6	1198.62	1129.98	1224.3	722.253	749.919	775.231
829	Snrnp27	921.634	-0.379662	0.0928388	-4.08948	4.32343e-05	0.000781191	732.213	757.677	766.233	984.964	1088.87	1020.49	881.412	861.586	858.093	1145.71	993.114	969.247
830	Esr1	124.841	-0.645255	0.157862	-4.08746	4.36117e-05	0.000787059	91.3152	77.4594	94.9605	121.851	107.555	101.129	146.469	151.43	168.916	151.233	133.391	152.382
831	Dnmbp	756.845	-0.252982	0.0619076	-4.08645	4.38016e-05	0.000789535	667.954	659.74	654.9	804.726	810.25	821.294	792.144	852.187	787.824	706.671	779.2	745.255
832	2210408F21Rik	48.5529	-0.869956	0.213153	-4.08137	4.47716e-05	0.000806051	24.5198	34.7232	31.1078	45.6942	45.0708	39.8389	58.9341	50.1286	75.6744	55.9104	57.7486	63.2842
833	Zkscan7	81.0105	-0.627703	0.153935	-4.07771	4.5481e-05	0.000817838	58.3403	58.7623	55.6665	77.4263	88.0929	84.2745	72.801	93.9912	99.9983	83.4073	90.2831	109.082
834	Kcnb1	126.337	-0.525856	0.12897	-4.07737	4.55484e-05	0.000818069	98.0793	92.5951	94.9605	148.506	131.115	124.113	140.402	112.789	141.889	128.319	167.552	135.728
835	AI606473	440.55	0.678076	0.166418	4.07455	4.61036e-05	0.000826059	607.923	633.92	600.052	324.937	290.911	295.727	378.738	345.679	378.372	505.943	415.627	508.772
836	Pold4	279.215	-0.507988	0.124665	-4.07482	4.60499e-05	0.000826059	182.63	229.707	224.303	270.357	301.155	306.453	337.138	247.51	314.859	365.709	265.156	305.596
837	Macrod1	95.1344	-0.873472	0.214669	-4.06892	4.72311e-05	0.000845251	56.6493	62.3236	57.3038	92.6577	68.6305	72.0164	115.268	127.41	135.133	140.234	105.737	108.249
838	Otud7b	1828.33	-0.249021	0.0612112	-4.06822	4.73746e-05	0.000846807	1608.16	1628.43	1570.94	1887.43	1904.24	1942.91	1762.82	1716.91	1845.91	2013.69	2033.4	2025.09
839	Mob4	1693.25	-0.339399	0.0834392	-4.06763	4.74943e-05	0.000847788	1409.47	1467.28	1357.28	1862.04	1821.27	1878.56	1886.76	1941.44	1936.45	1606.74	1543.76	1607.92
840	Slfn8	622.378	-0.814768	0.200317	-4.06739	4.75427e-05	0.000847788	403.309	407.775	377.386	835.189	847.126	836.616	684.676	750.885	858.093	461.032	536.818	469.635
841	Kctd11	107.462	-0.536389	0.131938	-4.06545	4.79393e-05	0.000853844	73.5595	96.1565	72.039	124.39	118.823	98.0649	125.668	121.144	120.268	123.736	104.11	111.58
842	Zc3h6	110.61	-0.684853	0.168571	-4.06269	4.85102e-05	0.000862986	71.023	86.3627	72.039	107.889	103.458	108.791	123.068	108.612	114.863	118.237	144.778	168.203
843	Cmpk2	121.077	-0.873308	0.214992	-4.06204	4.86449e-05	0.000864356	71.023	73.898	77.7694	167.545	193.6	183.872	128.268	113.834	120.268	98.0724	107.364	117.409
844	Arhgap25	1484.74	-0.412331	0.101567	-4.05968	4.9139e-05	0.000872101	1179.49	1191.27	1200.1	1439.37	1444.31	1546.05	1477.69	1370.18	1506.73	1818.46	1847.96	1795.27
845	4930432K21Rik	81.5096	-0.721405	0.177827	-4.05679	4.97526e-05	0.000881945	49.0397	46.2976	68.7645	88.8499	76.8252	79.6777	113.535	93.9912	112.16	76.9914	86.2163	85.7667
846	Nat9	153.166	-0.451863	0.111406	-4.05602	4.99163e-05	0.000883801	121.754	128.209	112.152	149.776	147.504	151.694	170.736	162.918	159.457	179.647	164.299	189.853
847	Cbx4	622.805	-0.591361	0.145995	-4.05056	5.10947e-05	0.000903599	441.357	475.44	436.327	687.952	687.33	683.39	831.145	819.812	772.96	513.276	572.606	552.071
848	Ndufa9	2889.73	-0.284974	0.0704069	-4.04753	5.17616e-05	0.000914313	2436.76	2486.71	2521.37	3309.02	3329.09	3176.38	2963.17	2969.08	3116.16	2917.42	2701.17	2750.36
849	Clstn3	592.804	-0.359525	0.0888619	-4.04588	5.2127e-05	0.000919683	462.495	511.944	495.268	597.833	612.553	562.341	614.475	552.459	632.422	725.002	649.062	697.791
850	Tecpr1	1741.22	-0.604869	0.149515	-4.04554	5.22017e-05	0.000919917	1215	1316.81	1226.3	1860.77	1742.4	1644.12	1686.56	1520.57	1613.49	2438.06	2244.06	2386.48
851	Arhgef6	8521.15	0.445356	0.110097	4.04513	5.2293e-05	0.000920443	10926.5	9997.6	10999.9	7524.31	7556.53	8004.55	6650.89	6474.95	7218.79	8641.37	8933.14	9325.26
852	Cox4i2	32.9597	1.09801	0.271566	4.04327	5.2711e-05	0.000926712	53.2672	68.556	44.2058	22.8471	18.4381	18.3872	16.4669	21.9313	27.0266	32.0797	40.668	31.6421
853	App	11387.6	-0.262845	0.0650303	-4.04189	5.30228e-05	0.0009311	9911.93	9995.82	9806.31	11154.5	11435.7	11360.2	11352.6	11131.7	11590.3	12990.5	12886.1	13035.7
854	Rgs19	2033.81	0.42894	0.106139	4.04132	5.31512e-05	0.000932262	2538.23	2520.55	2504.99	1658.95	1690.15	1736.06	1716.89	1750.32	1736.46	2150.26	2222.1	2180.81
855	Fastkd3	458.226	0.273624	0.0677518	4.03862	5.37675e-05	0.000941969	549.583	511.054	514.097	475.981	435.343	482.663	401.272	427.138	427.02	417.953	430.268	426.336
856	Cops5	3059.87	-0.286103	0.0709354	-4.03328	5.50028e-05	0.00096115	2512.86	2576.64	2789.88	3264.6	3688.63	3381.71	3092.31	3130.95	3266.16	3094.32	2945.18	2975.19
857	Borcs6	482.885	-0.275132	0.0682193	-4.03306	5.50549e-05	0.00096115	385.553	440.717	426.504	505.175	486.56	488.792	493.14	509.641	499.991	545.356	533.565	479.628
858	Srpk1	3098.42	0.267068	0.0662132	4.03346	5.49615e-05	0.00096115	3594.27	3520.39	3534.01	2857.16	2848.68	2926.62	2721.37	2861.51	2717.52	3075.99	3284.35	3239.15
859	Ccdc18	88.471	-0.5663	0.140458	-4.0318	5.53506e-05	0.000965188	61.7223	74.7884	58.941	112.966	102.434	93.4681	84.9345	92.9468	83.7823	99.9055	101.67	94.0936
860	1700066M21Rik	361.059	-0.345016	0.0856924	-4.02622	5.66812e-05	0.00098495	307.766	311.618	279.97	423.941	363.639	392.26	403.872	390.586	381.075	362.959	326.158	388.865
861	Gstm4	312.011	-0.441812	0.109721	-4.02667	5.65729e-05	0.00098495	227.443	251.075	258.686	341.437	364.664	364.679	305.937	253.776	329.724	369.375	335.105	342.234
862	Cystm1	11.5626	-1.9385	0.481455	-4.02634	5.66521e-05	0.00098495	5.91858	3.56135	1.63725	16.5007	17.4137	13.7904	19.0669	13.5765	13.5133	8.24908	12.2004	13.323
863	Clstn1	2518.13	0.296316	0.0736105	4.02547	5.68626e-05	0.000986958	2940.69	2967.5	2875.01	2236.48	2211.54	2188.07	2456.17	2283.99	2217.53	2588.38	2611.7	2640.45
864	Trmt61b	54.6269	0.786912	0.195651	4.02202	5.77011e-05	0.00100035	87.9332	83.6917	69.5832	49.5021	41.9978	42.9034	45.0673	36.5521	28.3779	61.4098	59.3754	49.1285
865	Rexo2	1198.23	0.214585	0.0533824	4.01978	5.82529e-05	0.00100665	1299.55	1319.48	1385.93	1161.39	1225.11	1268.71	1118.88	1097.61	1129.71	1128.29	1123.25	1120.8
866	Nrros	3887.11	0.212211	0.0527899	4.01992	5.82179e-05	0.00100665	4267.3	4414.29	4313.34	3773.58	3801.31	3714.21	4142.72	3879.75	3640.48	3544.35	3664.19	3489.79
867	Ppm1b	1907.59	0.268185	0.0667172	4.01973	5.82658e-05	0.00100665	2272.74	2134.14	2145.62	1817.61	1827.42	1985.81	1936.16	1889.22	1841.86	1606.74	1658.44	1775.29
868	Cox15	936.989	-0.195001	0.0485286	-4.01827	5.8627e-05	0.00101172	813.382	856.505	863.65	998.926	960.827	1023.55	942.079	957.666	929.714	965.142	991.487	940.936
869	Atrnl1	127.121	0.810122	0.201755	4.01536	5.9354e-05	0.00102309	205.459	181.629	175.186	110.428	128.042	87.3391	140.402	139.942	120.268	77.908	78.0827	80.7706
870	Ltbr	1490.1	-0.285989	0.0712625	-4.01318	5.99065e-05	0.00103024	1279.26	1225.1	1332.72	1543.45	1564.16	1518.47	1706.49	1652.16	1720.24	1404.18	1484.38	1450.54
871	Slc45a4	1187.31	0.211344	0.0526621	4.01322	5.98969e-05	0.00103024	1327.45	1323.93	1320.44	1119.51	1083.75	1149.2	1205.55	1169.67	1043.23	1143.87	1138.71	1222.38
872	Eif2ak3	977.145	-0.278108	0.0693141	-4.01229	6.01326e-05	0.00103294	829.447	858.285	844.003	912.615	960.827	979.117	1008.81	1050.61	1024.31	1042.13	1164.73	1050.85
873	Ddx58	547.042	-0.468929	0.117064	-4.00574	6.18248e-05	0.00106079	405	447.84	419.136	679.067	658.648	706.374	513.074	481.444	582.422	528.858	552.272	590.375
874	Slc35b2	1327.89	0.352279	0.0879972	4.00329	6.24666e-05	0.00107058	1513.47	1576.79	1670	1105.55	1132.92	1150.73	1229.82	1175.93	1244.57	1481.17	1295.68	1358.11
875	Arl8a	2757.76	0.145071	0.0362615	4.00069	6.31591e-05	0.00108036	3021.86	2951.47	2941.32	2680.73	2617.18	2609.45	2754.3	2834.36	2687.79	2715.78	2677.58	2601.31
876	Surf6	1187.73	0.223348	0.0558285	4.0006	6.31812e-05	0.00108036	1346.05	1310.58	1332.72	1111.89	1097.06	1155.33	1209.88	1133.12	1244.57	1152.12	1040.29	1119.13
877	Snhg4	273.492	0.532321	0.13308	4.00001	6.33398e-05	0.00108183	388.09	356.135	323.357	225.933	253.011	240.565	264.337	337.324	229.726	230.974	233.435	199.012
878	Nemp2	263.864	-0.367224	0.0918351	-3.99874	6.36817e-05	0.00108643	216.451	227.036	208.749	285.589	243.792	268.146	275.604	273.619	258.104	311.632	289.557	308.094
879	Pcdhgb4	129.145	-0.521401	0.130456	-3.99675	6.42172e-05	0.00109432	98.9249	89.9241	101.51	151.045	154.675	170.081	149.935	134.721	129.728	118.237	126.884	124.07
880	Pradc1	255.027	-0.341506	0.0854933	-3.99453	6.48229e-05	0.00110339	210.532	210.12	214.48	281.781	292.96	275.808	269.537	268.397	289.184	244.723	251.329	251.471
881	Sgcb	558.206	0.290423	0.0727294	3.9932	6.51873e-05	0.00110708	635.825	657.959	647.533	501.367	504.998	579.196	514.807	483.532	489.181	532.524	562.846	588.709
882	Mrps33	466.504	-0.352054	0.0881586	-3.99341	6.51298e-05	0.00110708	377.944	403.323	378.205	502.636	556.215	504.115	439.406	444.892	460.803	551.772	511.604	467.137
883	Gm27505	70.2955	0.924771	0.231785	3.98977	6.61365e-05	0.00112192	138.664	101.498	88.4115	48.2328	36.8761	50.5647	52.8674	73.1043	40.5398	75.1583	60.1887	77.4399
884	Glul	1906.54	0.179962	0.045138	3.98692	6.69356e-05	0.0011342	2090.95	2099.42	2072.76	1873.46	1853.02	1935.25	1824.36	1864.16	1967.53	1726.81	1780.45	1790.28
885	Gm5086	14.3778	-1.8286	0.459169	-3.98241	6.8219e-05	0.00115464	5.91858	6.23236	2.45588	21.5778	26.6327	26.0485	14.7335	12.5322	18.9186	12.8319	13.8271	10.8249
886	Dennd4c	2045.16	0.320561	0.0805408	3.9801	6.88864e-05	0.00116462	2560.21	2330.9	2324.08	1721.15	1732.15	1791.22	1917.96	1895.49	2186.45	1969.7	1965.89	2146.67
887	Spef1	32.9625	-1.20755	0.303865	-3.97396	7.06887e-05	0.00119374	24.5198	10.6841	14.7353	33.0014	21.5111	33.7098	36.4005	39.6852	44.5938	56.827	37.4146	42.467
888	Capns1	3987.92	-0.160343	0.0403713	-3.97169	7.13631e-05	0.00120377	3497.04	3703.8	3791.05	4163.25	3991.84	4118.73	4083.79	3938.23	4221.55	4302.35	3973.27	4070.17
889	2810474O19Rik	2299.47	0.311315	0.078583	3.96161	7.44476e-05	0.00125439	2862.9	2699.5	2514.82	2044.82	2013.84	2076.22	2085.23	2116.89	2178.34	2090.68	2344.11	2566.34
890	Mppe1	328.203	-0.472086	0.119359	-3.95517	7.64795e-05	0.00128718	273.946	263.54	224.303	355.399	370.81	392.26	400.405	378.053	366.21	300.633	279.796	333.075
891	Atp8a1	1836.93	0.197861	0.0500768	3.95114	7.77787e-05	0.00130524	2131.53	2019.29	1946.69	1724.96	1684.01	1772.83	1865.96	1793.14	1820.24	1710.31	1702.36	1871.88
892	Trim37	1651.25	0.185492	0.0469448	3.95127	7.77368e-05	0.00130524	1846.6	1825.19	1773.14	1684.34	1713.71	1555.25	1577.35	1635.45	1578.35	1531.58	1550.27	1543.8
893	Galnt1	2744.61	-0.37441	0.0947626	-3.95103	7.78141e-05	0.00130524	2260.05	2185.78	2288.06	3118.63	3295.29	3124.29	2989.17	3115.29	2991.84	2473.81	2540.94	2552.18
894	Aar2	953.279	0.23437	0.0593632	3.94806	7.87876e-05	0.00132009	1019.69	1108.47	1089.59	866.921	897.319	977.585	898.745	908.581	1004.04	881.735	852.402	934.274
895	Plaur	1260.09	0.310734	0.0787249	3.94709	7.9108e-05	0.00132398	1439.06	1548.3	1439.96	1083.97	1119.6	1132.34	1135.35	1145.65	1148.63	1399.59	1273.72	1254.86
896	Kctd18	312.817	-0.323915	0.0820708	-3.94677	7.92118e-05	0.00132423	271.409	257.308	260.323	363.015	323.69	334.034	319.804	361.344	295.941	298.8	336.731	331.409
897	Gipc1	1756.11	-0.232417	0.0589009	-3.9459	7.95008e-05	0.00132758	1488.95	1580.35	1590.59	1741.46	1768	1664.04	1856.42	1794.19	1978.34	1981.61	1835.76	1793.61
898	Tada3	635.183	-0.392635	0.0995448	-3.94431	8.00306e-05	0.00133346	524.217	490.576	526.376	700.645	761.082	691.051	707.21	735.22	728.366	590.267	570.979	596.204
899	Ccnj	113.648	0.443703	0.112491	3.94435	8.00155e-05	0.00133346	133.591	157.59	136.71	97.7349	94.2389	93.4681	115.268	106.523	99.9983	108.155	112.244	108.249
900	Mgat4a	1714.54	-0.219493	0.0556692	-3.94281	8.05341e-05	0.00134036	1591.25	1508.23	1477.62	1789.69	1903.22	1794.28	1846.02	1721.08	1851.32	1640.65	1664.14	1786.95
901	Mvb12b	1440.55	-0.329102	0.0834763	-3.94247	8.06482e-05	0.00134077	1152.43	1187.71	1283.6	1544.72	1583.62	1495.49	1696.96	1635.45	1577	1300.6	1349.37	1479.68
902	Rtn4	13345.8	0.18511	0.0469728	3.94079	8.12129e-05	0.00134866	14682.3	14588.2	14733.6	13276.7	13086.9	13251	13051.3	12977	13753.8	12696.2	11742.5	12309.6
903	Gk	2088.25	0.39371	0.0999797	3.9379	8.21979e-05	0.0013635	2617.7	2497.4	2518.09	1920.43	1807.95	1958.23	1617.22	1702.28	1844.56	2268.5	2210.72	2095.87
904	Prr11	1949.04	-0.294638	0.0748433	-3.93673	8.25996e-05	0.00136865	1689.33	1710.34	1597.14	2161.59	2174.67	2059.36	2134.63	2160.75	2024.29	1699.31	2059.43	1917.68
905	Cdc42se1	5882.31	0.271552	0.0689937	3.9359	8.28852e-05	0.00137103	6567.93	6769.24	6910.02	5970.71	6106.07	6058.57	5684.54	5397.18	5736.39	5095.18	5121.73	5170.15
906	Arpin	336.617	-0.448444	0.11394	-3.93578	8.29262e-05	0.00137103	247.735	261.759	285.7	314.782	305.252	343.227	377.872	342.546	331.075	395.039	418.068	416.343
907	Gm13748	16.7583	-1.82571	0.463972	-3.93495	8.32145e-05	0.00137276	7.6096	6.23236	3.2745	26.655	27.6571	22.984	26.0003	19.8426	27.0266	9.16564	13.8271	10.8249
908	Rad23a	1691.84	-0.305759	0.0776993	-3.93516	8.31409e-05	0.00137276	1422.15	1446.8	1439.96	1832.85	1904.24	1849.44	1866.83	1887.13	1893.21	1579.24	1570.6	1609.58
909	Napsa	1155.97	-0.814605	0.20711	-3.93321	8.38202e-05	0.00138124	719.53	712.27	779.331	1161.39	987.46	1086.38	1040.88	979.597	1114.85	1768.05	1730.83	1791.11
910	Cd33	2526.83	-0.763114	0.194292	-3.92765	8.57784e-05	0.00141195	1836.45	1647.12	1493.17	3493.07	3192.86	3279.05	3411.25	3092.31	2921.57	1888.12	1920.35	2146.67
911	Rhoa	12707.5	0.143329	0.0365076	3.92601	8.6368e-05	0.00142009	13967.9	13490.4	13567.9	12708.1	12720.2	12630.5	12679.5	12251.2	12651.1	11624.8	11969.4	12228.8
912	Tmem178b	9.83022	-2.60285	0.663199	-3.92469	8.68398e-05	0.00142472	2.53653	2.67101	0.818625	11.4236	17.4137	19.9194	11.2668	12.5322	18.9186	7.33251	8.13361	4.99612
913	Hnrnpul1	7511.75	-0.159055	0.0405249	-3.92487	8.67749e-05	0.00142472	6945.88	6970.45	6808.51	7916.52	7656.91	7656.72	7830.44	7777.25	7622.84	7113.45	8157.2	7684.87
914	Lat2	2724.48	-0.294055	0.0749424	-3.92374	8.71842e-05	0.00142881	2210.17	2438.63	2340.45	2913.01	2918.33	2790.25	2612.17	2546.12	2854.01	3332.63	2841.88	2896.08
915	6720489N17Rik	49.7668	-0.724503	0.184732	-3.92191	8.78505e-05	0.00143816	37.2025	33.8328	29.4705	48.2328	63.5088	62.8228	52.0007	53.2617	47.2965	48.5779	59.3754	61.6188
916	Coq10b	291.268	-0.459352	0.117162	-3.92064	8.83131e-05	0.00144415	240.125	220.804	218.573	343.976	333.934	349.356	328.471	308.082	354.048	252.972	267.596	277.285
917	Nabp1	582.068	-0.614889	0.15689	-3.91924	8.88303e-05	0.00144934	455.731	415.788	378.205	628.296	600.261	619.035	483.607	545.149	517.559	764.415	784.893	791.885
918	Zfp142	581.416	0.250198	0.0638531	3.91834	8.91609e-05	0.00144934	663.727	670.424	649.989	574.986	519.338	520.97	554.674	561.858	540.531	523.358	606.767	590.375
919	Slx4ip	329.042	0.372982	0.0951921	3.91821	8.92107e-05	0.00144934	411.764	381.955	396.215	276.704	321.642	274.275	332.804	318.526	371.615	292.384	270.849	299.767
920	Cst3	8226.6	0.681361	0.173887	3.91841	8.91363e-05	0.00144934	10778.6	11607.3	12005.1	6446.69	6079.44	6133.65	6399.55	5527.73	6056.65	10183	8654.97	8846.46
921	Il16	393.888	-0.384311	0.0980647	-3.91895	8.89348e-05	0.00144934	302.693	324.083	333.181	432.826	464.024	435.163	447.206	463.69	417.56	356.543	374.146	375.542
922	Bmp1	8.82034	-2.97956	0.760348	-3.91868	8.90363e-05	0.00144934	1.69102	1.78068	0.818625	13.9621	15.365	10.7258	19.0669	14.6209	10.8106	5.49939	6.50689	4.99612
923	Snta1	108.504	-1.79254	0.458036	-3.91353	9.09574e-05	0.00147611	35.5115	30.2715	48.2989	123.121	121.896	121.049	240.07	201.559	221.618	46.7448	56.1219	55.79
924	Bahcc1	89.6934	-1.60814	0.410956	-3.91317	9.10933e-05	0.00147672	38.048	40.0652	27.8333	125.659	120.872	105.726	154.269	187.982	132.43	52.2442	52.0551	39.1363
925	Rab7	10158.5	-0.361829	0.0925842	-3.90811	9.30192e-05	0.00150631	8489.78	8284.59	8330.33	11334.7	11474.6	11386.3	11627.4	11200.6	11864.7	9119.81	9341.45	9447.66
926	Gm12663	86.1356	-0.542019	0.138719	-3.90731	9.33297e-05	0.0015097	61.7223	68.556	62.2155	81.2342	97.3119	96.5326	84.0678	93.9912	105.404	85.2405	104.924	92.4282
927	Klc3	8.00066	-5.14533	1.318	-3.9039	9.46546e-05	0.00152948	0.845512	0	0	1.26928	5.12168	1.53226	13.8669	14.6209	10.8106	18.3313	15.4539	14.1557
928	Nbeal1	738.459	-0.644576	0.165139	-3.90324	9.49149e-05	0.00153204	633.288	495.028	430.597	695.568	625.869	691.051	803.411	772.816	782.419	869.819	950.006	1111.64
929	Smarcal1	687.115	-0.211637	0.054269	-3.89977	9.62826e-05	0.00155244	603.695	621.456	616.425	750.147	711.914	755.406	689.009	691.357	664.853	709.421	723.078	708.616
930	Sh3bgrl2	3366.1	0.296563	0.0760535	3.8994	9.64306e-05	0.00155315	3913.03	3936.18	3878.65	3399.14	3356.75	3633	2921.57	2891.8	3287.78	2863.35	3038.72	3273.29
931	Kif13a	815.593	-0.300122	0.0770339	-3.89597	9.78058e-05	0.00157361	684.019	734.528	670.454	794.572	814.347	801.374	815.544	822.945	831.067	914.731	945.939	957.59
932	Mtpn	13402.1	-0.332522	0.08539	-3.89416	9.85397e-05	0.00158202	11598.7	11197.8	10862.3	14510.5	14228	15183.2	15073.3	14909.1	15663.2	12088.6	12173.6	13337.1
933	Lrrc61	301.302	-0.432142	0.110968	-3.89428	9.84914e-05	0.00158202	221.524	241.281	254.592	277.973	310.374	289.598	364.872	270.486	372.967	345.545	339.172	327.246
934	Ccdc102a	49.2225	-1.28225	0.32931	-3.89375	9.87078e-05	0.00158302	21.9833	28.4908	20.4656	71.0799	77.8496	55.1615	72.801	64.7495	75.6744	29.3301	43.1081	29.9767
935	Efhd2	13042.7	0.230791	0.0593019	3.8918	9.95041e-05	0.00159349	13967.9	14841.9	15192	13547.1	13379.9	13116.2	12605	12138.4	12460.6	12071.2	11507.4	11685.1
936	ENSMUSG00000116930.1	153.053	0.506667	0.130194	3.89163	9.95733e-05	0.00159349	203.768	160.261	222.666	132.006	133.164	165.485	132.602	145.164	167.565	123.736	122.818	127.401
937	Atmin	2046.04	-0.224558	0.0577072	-3.89134	9.96938e-05	0.00159372	1756.13	1806.49	1883.66	2202.21	2150.08	2117.59	2252.5	2174.33	2258.07	1960.53	2006.56	1984.29
938	Rmi1	473.595	-0.280166	0.072017	-3.89028	0.000100129	0.00159896	383.862	412.226	427.322	487.405	484.511	514.841	483.607	489.798	505.397	456.449	482.323	555.402
939	Bche	19.5985	-7.37945	1.89739	-3.88926	0.000100552	0.00160401	0	0	0	68.5413	47.1195	59.7583	21.667	18.7982	17.5673	0.916564	0.813361	0
940	Bmf	142.527	-0.792606	0.204048	-3.88441	0.00010258	0.00163463	89.6242	87.2531	99.8723	157.391	109.604	122.581	160.335	127.41	160.808	239.223	182.193	174.032
941	Arhgap10	2495.91	0.196885	0.0506987	3.88343	0.000102995	0.00163866	2730.16	2849.08	2707.19	2410.37	2416.41	2280.01	2350.43	2267.28	2339.15	2449.06	2597.87	2553.85
942	Tubb5	37326.5	0.12979	0.0334228	3.88329	0.000103052	0.00163866	39252	39840.8	40612	36664.5	37263.3	36118.5	35950.7	36068.6	36535.9	34337.2	37312.1	37962.2
943	AU040320	868.575	-0.257682	0.0663732	-3.88231	0.000103467	0.00164351	748.278	766.581	759.684	870.729	873.759	913.229	838.945	872.029	864.85	981.64	924.791	1008.38
944	Gm29247	594.96	-0.270642	0.069722	-3.88173	0.000103718	0.00164401	523.372	508.383	515.734	635.911	645.332	582.26	546.874	629.741	591.882	642.512	657.196	660.321
945	Tle3	1166.95	0.400302	0.103121	3.88185	0.000103666	0.00164401	1486.41	1387.15	1403.12	1092.85	1099.11	1048.07	1267.95	1213.53	1190.52	912.898	950.006	951.761
946	Nfu1	705.683	-0.312026	0.0804114	-3.88037	0.000104296	0.00165142	611.305	602.759	579.587	731.108	766.203	779.922	741.877	634.963	675.664	819.408	809.294	716.111
947	Tcea1-ps1	269.928	-0.365548	0.0942632	-3.87795	0.000105341	0.00166622	215.605	235.939	212.024	321.129	300.131	326.372	268.67	291.373	268.914	259.388	279.796	259.798
948	Kcnj10	781.12	-0.579651	0.149527	-3.87658	0.000105937	0.00167387	576.639	553.79	577.131	976.079	946.487	1020.49	981.947	844.876	897.282	626.93	685.663	686.134
949	Nphp1	193.916	-0.43842	0.113112	-3.87598	0.000106196	0.00167619	169.102	138.893	152.264	184.046	198.721	185.404	183.736	200.515	229.726	232.807	226.114	225.658
950	Dlgap5	1578.55	-0.343972	0.0889349	-3.86769	0.000109873	0.0017324	1310.54	1355.09	1272.14	1779.54	1856.1	1673.23	1741.16	1751.37	1806.73	1442.67	1487.64	1466.36
951	Gm45213	835.686	0.315049	0.0815252	3.86444	0.000111345	0.00175377	1012.92	974.029	948.787	826.304	885.026	914.762	730.61	727.909	741.879	745.167	791.4	729.434
952	Ccpg1	1165.99	-0.203949	0.0527906	-3.86336	0.00011184	0.00175972	1056.04	1071.08	1012.64	1252.78	1160.57	1221.21	1219.42	1087.16	1244.57	1240.11	1233.06	1193.24
953	Tulp3	646.773	-0.318955	0.0826883	-3.85731	0.000114642	0.00180191	563.956	523.518	545.204	759.032	727.279	763.068	674.276	668.382	677.015	621.431	634.422	603.698
954	Rmnd5b	302.677	-0.347897	0.0902228	-3.85598	0.000115268	0.00180986	250.271	253.746	251.318	310.975	325.739	254.356	316.338	357.166	349.994	329.963	305.01	327.246
955	Fuom	213.153	-0.387823	0.10065	-3.85316	0.000116602	0.00182888	156.42	178.068	185.009	200.547	203.843	228.307	247.003	234.978	240.536	249.305	210.66	223.16
956	Ccnb2	2505.01	-0.227454	0.0590784	-3.85004	0.000118099	0.00185043	2238.91	2237.42	2183.27	2791.16	2717.56	2566.54	2775.1	2667.26	2614.82	2471.97	2391.28	2404.8
957	Fem1b	4005.58	-0.123724	0.0321604	-3.84708	0.000119535	0.00187097	3741.39	3768.8	3746.03	4161.98	4066.61	4089.61	4062.12	4133.52	4220.2	3918.31	3973.27	4185.08
958	Gm12319	84.0529	0.841196	0.218806	3.84448	0.00012081	0.00188895	152.192	135.331	90.0488	78.6956	72.7279	50.5647	90.1345	61.6164	87.8363	43.9951	79.7094	65.7822
959	Ap2a2	2301.45	0.205766	0.0535645	3.84147	0.000122299	0.00191024	2654.06	2410.14	2601.59	2156.51	2244.32	2200.33	2326.16	2303.83	2374.28	2065.94	2129.38	2150.83
960	Gm10010	23.3367	-1.10419	0.287486	-3.84085	0.000122607	0.00191306	13.5282	8.90338	14.7353	35.5399	23.5597	29.113	19.0669	24.02	27.0266	30.2466	27.6543	26.646
961	Plek	18401.5	-0.251871	0.0655944	-3.83983	0.00012312	0.00191905	16457.9	16254.9	15578.4	20882.3	20810.4	20576.8	19360.7	18631.1	18929.4	17565	18042.8	17727.9
962	Myl12b	5627.17	0.26715	0.06958	3.83947	0.000123302	0.00191989	6469.85	6373.93	6492.52	5438.88	5330.65	5214.29	5038	4813.39	4902.62	5933.84	5765.92	5752.2
963	Recql5	378.035	-0.31254	0.081432	-3.83805	0.000124017	0.00192903	307.766	322.302	328.269	402.363	391.296	413.711	426.406	427.138	412.155	337.296	386.346	381.37
964	Cept1	1373.31	0.292568	0.0762715	3.83587	0.000125121	0.00194216	1617.46	1563.43	1592.23	1429.21	1427.92	1380.57	1287.02	1301.26	1278.36	1312.52	1129.76	1159.93
965	B130055M24Rik	43.9086	0.707743	0.184503	3.83595	0.000125081	0.00194216	61.7223	64.9946	60.5783	34.2707	27.6571	38.3066	41.6006	33.4191	29.7292	43.9951	40.668	49.9612
966	Alad	551.572	0.205635	0.0536346	3.834	0.000126078	0.00195499	614.687	599.197	622.974	554.677	540.85	534.76	520.007	533.661	510.802	532.524	537.632	517.098
967	Rnf181	942.123	-0.368472	0.0961244	-3.83328	0.000126444	0.00195864	750.814	755.897	810.439	1030.66	1018.19	1112.42	1087.68	1087.16	1033.77	915.648	878.43	824.36
968	Casp3	2662.63	0.195966	0.0511516	3.83109	0.000127575	0.00197411	2996.49	2979.96	2852.09	2490.34	2580.3	2725.9	2367.77	2450.04	2509.42	2709.36	2670.26	2619.63
969	Irak1	1813.23	-0.242016	0.0631798	-3.83059	0.000127837	0.00197613	1613.24	1558.98	1610.24	1980.08	1826.39	1866.3	2049.69	2030.21	1917.53	1747.89	1713.75	1844.4
970	Prr14l	1213.64	0.185112	0.0483496	3.82861	0.000128868	0.00198797	1403.55	1316.81	1284.42	1134.74	1135.99	1158.39	1220.28	1204.13	1183.76	1119.12	1217.6	1184.91
971	Creb3l2	179.616	-0.643495	0.168074	-3.82864	0.000128855	0.00198797	125.981	133.551	121.157	151.045	158.772	154.759	189.803	192.16	204.051	242.89	248.075	233.152
972	Gm14005	62.8069	-0.601362	0.157233	-3.82466	0.000130954	0.00201623	50.7307	40.0652	44.2058	72.3492	62.4845	73.5487	65.8676	75.1929	71.6204	65.9926	67.509	64.1169
973	Cdkn1a	3269.06	0.628646	0.164368	3.82463	0.000130969	0.00201623	4648.62	4384.02	4311.7	2572.84	2481.97	2520.57	2436.23	2319.49	2517.52	3921.06	3565.77	3548.91
974	Ncoa4	2104.83	0.225478	0.0589868	3.82251	0.0001321	0.00203154	2354.75	2342.48	2380.56	2162.86	2168.52	2148.23	2047.09	1908.02	2026.99	1845.96	1904.89	1967.64
975	Nfkbid	409.912	0.379237	0.0992187	3.82224	0.000132247	0.00203171	551.274	499.479	439.602	368.092	379.004	330.969	425.539	440.714	362.156	365.709	406.68	349.728
976	Rhobtb1	55.066	1.10254	0.288494	3.8217	0.000132536	0.00203407	87.9332	112.183	76.9508	43.1557	40.9734	12.2581	64.1342	55.3504	49.9991	35.746	48.8017	33.3075
977	Kif3c	480.239	-0.477659	0.125002	-3.82122	0.000132793	0.00203593	393.163	347.232	374.93	487.405	478.365	402.985	490.54	464.734	510.802	589.351	589.687	633.675
978	Ppif	244.961	0.388499	0.101723	3.81919	0.000133893	0.0020507	278.173	314.289	300.435	217.048	245.841	255.888	198.469	202.603	213.51	212.643	237.501	263.129
979	Adrm1	2185.85	0.242485	0.0635259	3.8171	0.000135029	0.00206472	2413.94	2525	2484.53	2028.32	1966.73	2034.85	2051.43	1956.06	1978.34	2239.17	2227.8	2324.03
980	Serinc2	84.1486	-0.872154	0.228492	-3.817	0.000135084	0.00206472	61.7223	40.0652	54.0293	90.1192	68.6305	99.5972	67.6009	84.5921	79.7284	119.153	116.311	128.234
981	Vcpip1	2830.59	-0.356787	0.0934831	-3.8166	0.000135304	0.00206598	2434.23	2392.34	2186.55	3133.86	3079.15	3067.59	3179.84	3245.83	3391.83	2530.63	2654.81	2670.43
982	Baz2a	2257.35	-0.194685	0.0510251	-3.81547	0.000135926	0.00207335	2119.7	2055.79	1940.14	2321.52	2245.34	2237.11	2324.43	2356.05	2191.85	2347.32	2511.66	2437.27
983	Mrps6	284.71	0.392588	0.102986	3.81205	0.000137816	0.00210005	343.278	306.276	386.391	239.895	262.23	303.388	255.67	264.22	313.508	249.305	235.061	257.3
984	Tgfbi	5830.57	0.892947	0.234325	3.81072	0.000138563	0.00210929	8887.17	9248.83	8614.39	4282.56	4170.07	3613.08	7153.56	6705.75	6517.46	3142.9	3944.8	3686.3
985	Med20	600.291	0.323326	0.0848635	3.80995	0.000138994	0.0021137	716.994	704.257	702.381	511.521	527.533	547.018	538.207	571.257	517.559	681.007	595.38	590.375
986	Nt5c3	725.885	-0.233213	0.0612495	-3.8076	0.000140324	0.00213176	640.052	643.714	638.528	708.26	797.958	805.971	710.676	731.043	772.96	802.91	714.131	744.422
987	Zfp384	1564.87	-0.219028	0.0575811	-3.80382	0.000142481	0.00216234	1428.91	1368.45	1379.38	1615.8	1672.74	1706.94	1677.89	1723.17	1658.08	1502.25	1555.15	1489.68
988	Mcoln2	1348.34	0.612633	0.161311	3.79785	0.000145958	0.00221285	1702.01	1852.79	1909.85	1120.78	1021.26	1159.92	932.546	973.331	1016.2	1444.51	1468.93	1577.94
989	Itgb1	22635.1	0.145091	0.038224	3.7958	0.000147166	0.00222667	24401.5	24614.3	24143.7	21373.5	21449.6	21379.7	22149.7	21182.5	22801	23545.6	22235.7	22345.1
990	Ust	559.37	0.57176	0.150623	3.79596	0.000147073	0.00222667	753.351	677.547	789.155	557.216	548.02	602.18	516.54	556.637	551.342	384.957	374.146	401.355
991	Mrps25	860.497	-0.25195	0.0664057	-3.7941	0.000148182	0.00223526	710.23	779.045	766.233	921.5	993.606	977.585	877.078	838.61	877.012	864.32	858.909	861.831
992	Nfkbia	2829.19	0.734737	0.193638	3.79439	0.000148006	0.00223526	4382.29	3864.96	3868.82	2063.86	1970.82	2010.33	2192.7	1932.04	1935.1	3406.87	3051.73	3270.79
993	Prepl	484.046	0.278438	0.0733869	3.79411	0.000148176	0.00223526	584.248	504.821	582.043	453.134	458.903	441.292	487.073	502.331	479.721	439.034	422.134	453.814
994	Rgs18	444.304	-1.2416	0.327765	-3.78808	0.000151814	0.00228776	212.223	251.966	194.014	693.029	767.228	700.245	570.274	540.971	608.098	309.799	244.822	238.981
995	Usp39	1883.22	-0.343232	0.0906409	-3.78672	0.00015265	0.00229803	1530.38	1579.46	1589.77	2085.43	2238.17	2157.43	2112.96	2035.43	2052.67	1718.56	1774.75	1723.66
996	Bin1	1820.47	-0.201309	0.0532263	-3.78214	0.000155487	0.00233839	1583.64	1671.16	1659.35	1825.23	1743.42	1771.3	1918.83	1846.4	1914.83	2022.86	1963.45	1925.17
997	Rcan2	164.089	0.527081	0.139397	3.78115	0.000156107	0.00234537	209.687	234.159	196.47	134.544	127.018	173.146	137.802	125.322	118.917	161.315	169.992	180.693
998	Vcl	2231.56	0.476439	0.126058	3.77953	0.000157123	0.00235826	2906.87	2796.55	2784.14	1750.34	1770.05	1909.2	1822.62	1814.03	1926.99	2246.5	2474.24	2577.17
999	Polr2e	1054.97	0.200668	0.0531789	3.77345	0.000161004	0.00240927	1111	1195.72	1196.01	1078.89	1016.14	1078.71	1047.81	992.129	997.28	943.145	1009.38	993.395
1000	Lcp2	2567.59	-0.171305	0.0453951	-3.77365	0.000160877	0.00240927	2343.76	2334.47	2354.37	2662.96	2608.98	2728.96	2731.77	2696.5	2766.17	2421.56	2601.13	2560.51
1001	2610002M06Rik	605.98	0.274895	0.0728401	3.77394	0.000160687	0.00240927	734.75	704.257	649.989	529.291	564.409	597.583	637.009	582.745	609.449	582.935	518.111	561.231
1002	Polr3k	1214.73	0.382466	0.101539	3.76668	0.00016543	0.00247303	1455.97	1533.16	1428.5	955.771	1068.38	1130.81	998.413	1071.5	1110.79	1399.59	1197.27	1226.55
1003	Ndufaf5	205.923	0.51572	0.1371	3.76163	0.000168811	0.00251855	256.19	258.198	284.882	158.66	163.894	183.872	152.535	189.027	166.213	239.223	194.393	223.993
1004	AI846148	218.588	-0.48779	0.129674	-3.76167	0.000168784	0.00251855	160.647	154.919	189.102	194.2	214.086	208.388	222.736	267.353	239.185	296.967	244.822	230.654
1005	Traf3	1372.59	0.218057	0.0580076	3.75911	0.000170516	0.00254145	1541.37	1522.48	1537.38	1320.06	1312.17	1380.57	1322.55	1411.96	1225.65	1268.52	1210.28	1418.07
1006	Ifrd1	3460.1	-0.168533	0.0448373	-3.75878	0.000170745	0.00254234	3108.1	3212.34	3174.63	3687.27	3834.09	3659.05	3356.65	3454.7	3462.1	3484.78	3518.6	3568.9
1007	Stat1	1154.53	-0.542455	0.144348	-3.75796	0.000171305	0.00254562	889.478	862.737	825.993	1474.91	1423.83	1418.88	1244.55	1368.09	1385.11	934.895	984.167	1041.69
1008	Yars	2482.21	0.140001	0.037254	3.75801	0.000171267	0.00254562	2670.97	2649.64	2674.45	2414.18	2529.09	2551.22	2394.63	2338.29	2439.15	2383.07	2396.97	2344.85
1009	Abcc4	1022.43	0.185431	0.0493654	3.75629	0.000172451	0.00256011	1118.61	1142.3	1113.33	992.58	1045.85	971.455	966.346	952.444	977.01	956.893	1059.81	972.578
1010	Gm26917	7094.08	0.482164	0.128394	3.75535	0.000173101	0.0025672	7645.12	9574.69	9827.6	6338.8	6014.9	6021.8	5441.01	6202.37	5397.2	7807.29	6987.58	7870.55
1011	Smim10l1	1713.15	-0.34806	0.092737	-3.75319	0.000174598	0.00258685	1472.88	1425.43	1367.1	1763.04	1737.27	1713.07	2048.83	1943.53	2133.75	1626.9	1739.78	1586.27
1012	Slc7a11	220.477	-0.434283	0.115774	-3.75112	0.000176047	0.00260574	153.883	175.396	194.014	192.931	224.33	248.227	204.536	251.687	258.104	241.056	233.435	268.125
1013	Fuca2	1756.13	0.225725	0.0602554	3.74614	0.000179574	0.00265532	1972.58	1928.47	2003.99	1825.23	1764.93	1775.89	1683.09	1513.26	1749.97	1570.99	1640.55	1644.56
1014	Gnai2	21657.1	0.0851513	0.0227365	3.74513	0.000180298	0.0026634	22338.4	22960	22591.6	21023.1	21432.2	21696.9	21703.4	20689.5	21376.7	21292.7	21598	21182.7
1015	Tubgcp4	1691.23	0.174253	0.0465372	3.74438	0.000180839	0.00266859	1974.27	1720.13	1850.09	1672.92	1619.48	1691.62	1652.76	1614.56	1608.08	1606.74	1612.89	1671.2
1016	Atp6v0e2	642.707	-0.55263	0.147598	-3.74415	0.000181006	0.00266859	480.251	449.62	496.087	743.8	755.96	853.471	767.01	742.53	783.77	542.606	565.286	532.087
1017	Myc	533.019	0.449293	0.120104	3.74087	0.000183386	0.00270103	684.864	709.599	610.695	456.942	457.878	387.663	455.006	483.532	437.83	563.687	584.807	563.729
1018	Mthfd2	3394.7	-0.338559	0.090516	-3.74032	0.000183785	0.00270424	2813.86	2843.74	2837.36	3814.2	4005.15	3907.27	3674.72	3666.7	3795.88	3128.23	3190	3059.29
1019	Nr2c2	2292.78	-0.266326	0.0712425	-3.73829	0.000185273	0.00272345	2089.26	2005.04	1879.56	2232.67	2145.98	2177.35	2509.03	2556.56	2459.42	2451.81	2394.53	2612.14
1020	Eno3	585.45	-0.281837	0.0754394	-3.73594	0.000187017	0.00274639	506.461	540.435	466.616	591.486	656.6	557.744	630.942	662.116	613.503	646.178	558.779	594.538
1021	Atp6v1e1	2521.57	-0.334221	0.0895344	-3.73288	0.000189302	0.00277724	2118.85	2041.54	2163.63	2891.43	2766.73	2880.66	2897.31	2655.77	2841.84	2428.9	2282.29	2289.89
1022	Ctss	11854.9	0.277106	0.0742434	3.7324	0.000189665	0.00277984	13048.8	13840.3	14042.7	11080.8	11301.5	11112	10556.1	9983.95	10733.6	13182	11817.3	11560.2
1023	Paqr8	102.429	-0.583629	0.156386	-3.73199	0.000189975	0.00278165	69.3319	82.8014	72.8577	104.081	109.604	108.791	110.068	87.7251	97.2956	116.404	123.631	146.553
1024	Ptpn6	7154.33	-0.379782	0.101778	-3.73146	0.000190371	0.00278473	5730.88	5953.69	5826.98	7187.95	7295.32	6919.7	7033.09	6862.4	6741.78	9039.16	8925.82	8335.19
1025	Pcdhga4	123.929	-0.494398	0.132717	-3.72519	0.000195165	0.0028493	95.5428	87.2531	99.8723	145.968	143.407	163.952	143.002	129.499	128.376	110.904	123.631	115.743
1026	Poli	251.956	-0.380892	0.102243	-3.72536	0.00019504	0.0028493	215.605	212.791	185.828	286.858	278.619	303.388	255.67	257.954	281.076	222.725	278.983	243.977
1027	Vash1	64.349	-0.643308	0.172752	-3.72389	0.00019618	0.00286132	43.9666	41.8459	49.1175	85.042	70.6792	82.7423	53.7341	69.9712	64.8638	60.4932	76.4559	73.2764
1028	Tbc1d20	2879.36	0.175498	0.0471417	3.72277	0.000197049	0.0028712	3017.63	3210.56	3224.57	2645.19	2706.3	2658.48	2876.51	2781.09	2943.19	2937.59	2712.56	2838.63
1029	6430548M08Rik	823.577	-0.330663	0.0888888	-3.71997	0.000199248	0.00290042	658.654	675.766	733.488	915.154	834.834	873.391	915.212	869.941	1021.6	747.916	775.133	861.831
1030	Gm28177	840.38	-0.536004	0.144189	-3.71737	0.000201305	0.00292752	634.979	614.333	633.616	1080.16	1038.68	1034.28	929.946	972.287	991.875	672.758	723.078	758.578
1031	Zfp451	1830.16	-0.290662	0.078238	-3.71511	0.000203118	0.00294567	1674.11	1604.39	1423.59	1926.77	1820.25	1956.7	2008.09	2120.02	2017.53	1644.32	1827.62	1938.49
1032	Uggt1	7521.94	-0.297396	0.0800598	-3.71468	0.000203464	0.00294567	6556.94	6205.65	6493.34	8303.66	8146.55	8186.89	8404.18	8379.84	8479.58	6634.09	7164.08	7308.49
1033	AI597479	636.615	-0.259685	0.0698949	-3.71537	0.000202905	0.00294567	596.086	532.422	532.925	670.182	685.281	691.051	702.876	680.914	685.123	601.266	606.767	654.492
1034	Ncbp1	1999.32	0.151846	0.0408755	3.71485	0.000203321	0.00294567	2233	2160.85	2089.13	1959.77	2008.72	2004.2	1865.09	1917.42	1874.29	1975.2	1905.7	1998.45
1035	Dennd4a	1152.73	-0.30926	0.0832556	-3.71459	0.000203536	0.00294567	1007.85	985.604	938.963	1152.51	1160.57	1187.5	1345.08	1354.52	1285.11	1018.3	1178.56	1218.22
1036	Clec5a	1840.89	-0.446082	0.120171	-3.71206	0.000205581	0.0029724	1433.99	1387.15	1518.55	2318.98	2201.3	2197.27	2005.49	1904.89	2154.02	1780.88	1550.27	1637.89
1037	Fez2	839.488	0.204041	0.0549772	3.71137	0.000206138	0.00297758	930.908	916.157	947.15	776.802	809.226	815.165	787.811	765.506	867.553	765.331	831.255	860.998
1038	P2rx1	5.93677	-4.71581	1.27082	-3.71083	0.000206577	0.00298104	0	0.890338	0	5.07714	3.07301	4.59679	6.93343	7.31043	5.40531	16.4982	8.13361	13.323
1039	Dagla	158.501	0.611187	0.164729	3.71027	0.000207039	0.00298483	225.752	211.01	207.931	128.198	103.458	104.194	150.802	126.366	136.484	157.649	191.953	158.21
1040	Rfwd2	1866.19	0.249654	0.067302	3.70946	0.000207703	0.00299152	2172.12	2182.22	1996.63	1799.84	1687.08	1844.85	1748.09	1891.31	2026.99	1702.06	1651.12	1692.02
1041	Fcgr4	1129.98	-0.304351	0.0820812	-3.70793	0.00020896	0.00300673	908.925	978.481	994.63	1303.55	1224.08	1222.75	1049.55	1034.95	1109.44	1212.61	1216.79	1303.99
1042	Timm10b	498.344	0.262144	0.0707291	3.70631	0.000210301	0.00302313	540.282	576.939	587.773	493.751	432.27	510.244	500.073	483.532	474.316	498.611	433.521	448.818
1043	Wdsub1	159.447	0.448512	0.121079	3.70429	0.000211981	0.00304436	205.459	176.287	215.298	167.545	152.626	157.823	161.202	158.741	122.971	117.32	141.525	136.561
1044	Cdon	176.628	0.378406	0.102267	3.70017	0.000215456	0.0030913	233.361	194.094	214.48	153.583	150.577	140.968	163.802	162.918	185.132	184.229	175.686	160.709
1045	Cpt1a	613.501	-0.610732	0.16515	-3.69804	0.000217268	0.00311431	414.301	459.414	444.514	698.106	680.159	687.987	818.144	851.142	758.095	483.029	506.724	560.398
1046	Neurl1a	31.2198	-2.48181	0.671223	-3.69744	0.000217782	0.0031187	5.91858	4.45169	10.6421	38.0785	37.9004	29.113	91.8679	64.7495	60.8098	6.41595	12.2004	12.4903
1047	Ppp1r12b	624.721	1.44563	0.391889	3.68888	0.000225243	0.00322246	1200.63	1059.5	1308.98	279.242	266.327	337.098	288.604	311.215	298.644	700.255	675.09	771.068
1048	Tex10	1133.82	0.216303	0.0586447	3.68836	0.000225703	0.00322338	1280.1	1209.08	1304.07	1204.55	1129.84	1136.94	1075.55	1061.06	1070.25	1023.8	1095.6	1015.05
1049	Gm11273	235.166	-0.334896	0.0907991	-3.68832	0.000225738	0.00322338	178.403	207.449	202.2	255.126	254.035	252.824	234.87	239.155	281.076	245.639	248.888	222.327
1050	L1cam	792.874	0.635837	0.172445	3.6872	0.000226739	0.00323459	1081.41	1048.82	1118.24	548.331	516.265	677.261	606.675	586.923	677.015	885.401	826.375	941.769
1051	Bms1	3641.48	-0.267345	0.0725453	-3.68522	0.000228507	0.00325671	3344.84	3046.74	3082.12	3886.55	4141.39	4221.39	3599.32	3800.38	3813.45	3275.8	3719.5	3766.24
1052	Slc5a3	283.98	0.457274	0.124177	3.68243	0.000231023	0.00328945	408.382	309.837	352.828	234.818	216.135	239.033	226.203	267.353	279.725	288.718	272.476	312.258
1053	Sdhaf4	313.659	-0.420373	0.114184	-3.68154	0.000231831	0.00329782	229.979	267.101	252.955	393.478	338.031	346.292	317.204	300.772	301.346	406.955	304.197	305.596
1054	Gabarapl1	1807.73	-0.41627	0.113079	-3.68122	0.000232123	0.00329883	1429.76	1459.26	1444.06	2006.74	2141.89	2056.3	2036.69	2016.63	2239.15	1741.47	1544.57	1576.28
1055	Amigo1	271.33	0.407536	0.110781	3.67874	0.000234391	0.00332791	338.205	318.741	342.185	220.855	269.4	220.646	308.537	278.84	268.914	233.724	226.928	228.989
1056	Cenpe	6965.13	-0.281848	0.0766506	-3.67705	0.000235944	0.00334679	6247.48	5943.89	5790.14	7628.4	7632.33	7785.43	7244.56	7431.57	7889.05	6015.41	7044.52	6928.79
1057	Taf13	827.016	0.171529	0.0466775	3.67476	0.000238071	0.00337377	900.47	893.009	913.586	813.611	835.858	804.439	774.81	768.639	812.148	812.076	801.161	794.383
1058	Slamf6	27.4065	1.09178	0.29713	3.67442	0.000238394	0.00337514	49.0397	39.1749	46.6616	31.7321	19.4624	22.984	22.5336	30.286	28.3779	15.5816	11.3871	11.6576
1059	Slc37a2	5077.06	0.422318	0.115101	3.66912	0.000243391	0.00344264	6244.1	6066.76	6503.16	4481.84	4182.36	4420.58	4153.12	3846.33	4587.76	5490.22	5347.85	5600.65
1060	Hibch	447.576	-0.3982	0.108628	-3.66573	0.000246633	0.00348521	344.969	385.516	351.19	519.137	540.85	534.76	445.473	505.464	499.991	416.12	431.081	396.359
1061	Vash2	164.129	-0.442415	0.120767	-3.66337	0.000248922	0.00351423	121.754	135.331	130.161	190.393	182.332	200.727	139.535	157.696	163.511	168.648	185.446	194.016
1062	Smap1	1623.72	-0.238743	0.0651829	-3.66267	0.000249602	0.00352052	1489.79	1388.04	1409.67	1691.96	1665.57	1769.77	1692.62	1712.73	1897.26	1490.33	1637.3	1639.56
1063	Spry1	35.8563	-0.949416	0.259251	-3.66215	0.000250105	0.0035243	16.0647	21.3681	26.196	45.6942	39.9491	29.113	46.8006	44.9069	36.4859	45.8282	52.0551	25.8133
1064	Smyd1	45.7578	-2.76177	0.755236	-3.65683	0.000255357	0.00359492	9.30063	9.79371	6.549	125.659	109.604	130.242	36.4005	39.6852	29.7292	19.2478	17.8939	14.9884
1065	Pigu	1232.79	0.186382	0.05099	3.65526	0.000256923	0.00361357	1376.49	1349.75	1347.46	1200.74	1180.04	1104.76	1233.28	1145.65	1183.76	1156.7	1292.43	1222.38
1066	Btbd9	1151.38	0.231366	0.0633017	3.65497	0.000257209	0.0036142	1303.78	1299	1287.7	971.002	1041.75	1072.58	1086.81	1138.34	1094.58	1207.12	1159.85	1154.1
1067	Mex3b	81.0024	-0.799099	0.218677	-3.65425	0.000257935	0.00361965	49.0397	49.8589	58.1224	73.6185	65.5575	61.2906	126.535	107.568	98.647	95.3227	107.364	79.1052
1068	Gm27533	57.072	0.906823	0.248165	3.65411	0.00025808	0.00361965	96.3883	98.8275	70.4018	34.2707	34.8274	38.3066	45.934	50.1286	29.7292	62.3264	49.615	74.1091
1069	Zic4	7.34361	-3.01162	0.824934	-3.65074	0.00026149	0.00366404	0.845512	1.78068	0.818625	15.2314	15.365	13.7904	7.8001	4.17739	9.4593	7.33251	5.69353	5.82881
1070	Dzip3	459.835	-0.31477	0.0862319	-3.65028	0.00026196	0.00366719	408.382	394.42	363.47	478.52	522.411	510.244	444.606	526.351	441.884	419.786	509.164	498.779
1071	Tmem70	930.214	-0.250849	0.0687333	-3.6496	0.000262647	0.00367337	788.862	840.479	812.895	1000.2	1024.34	1009.76	954.213	852.187	931.065	1067.8	922.351	958.422
1072	2900097C17Rik	4808.3	0.309078	0.0847124	3.64856	0.000263717	0.0036849	5821.35	5569.06	5479.06	4008.4	4116.81	4085.02	4613.33	4710	4375.6	4695.56	4939.54	5285.9
1073	Gpr19	80.1929	-0.622409	0.170671	-3.64685	0.000265477	0.00370604	60.8768	55.2009	54.8479	69.8106	89.1173	82.7423	88.4012	104.435	113.512	81.5742	94.3499	67.4476
1074	Acsf2	454.74	-0.321967	0.0883147	-3.64567	0.000266692	0.00371953	388.935	381.955	380.661	420.133	459.927	445.889	457.606	450.113	481.073	535.274	548.205	507.106
1075	Dbnl	2531.86	-0.142419	0.0390799	-3.6443	0.000268121	0.00373598	2293.03	2385.21	2369.1	2595.69	2711.42	2681.46	2541.1	2486.59	2486.44	2566.38	2631.22	2634.62
1076	Tomm40l	896.207	-0.260643	0.0715322	-3.64372	0.000268726	0.00374093	757.578	792.4	788.336	984.964	1067.36	963.794	901.345	904.404	940.524	941.311	856.469	856.002
1077	Ints6l	685.192	0.346603	0.0951671	3.64205	0.000270476	0.00376181	864.958	820.891	762.959	670.182	598.212	600.648	695.076	784.304	591.882	563.687	644.995	624.515
1078	Hsdl1	962.461	0.248544	0.068258	3.64124	0.00027133	0.00377017	1070.42	1095.12	1110.06	987.503	857.369	848.874	1013.15	924.247	982.416	939.478	851.589	869.325
1079	Zbtb38	1313.05	-0.213408	0.0586212	-3.64045	0.000272157	0.00377624	1197.24	1194.83	1128.88	1285.78	1422.8	1254.92	1379.75	1329.45	1467.54	1275.86	1400.61	1418.9
1080	Akap7	111.994	-0.497591	0.136688	-3.64035	0.00027227	0.00377624	76.9416	97.0468	83.4998	151.045	122.92	101.129	109.201	114.878	106.755	131.069	120.377	129.066
1081	1500011B03Rik	210.052	0.469543	0.128993	3.64007	0.000272563	0.0037768	273.1	243.952	281.607	149.776	165.942	160.888	192.403	208.869	193.24	241.056	205.78	204.008
1082	Srprb	1033.81	0.19985	0.0549374	3.63777	0.000275013	0.00380723	1130.45	1154.77	1149.35	1026.85	974.144	986.778	1043.48	1048.52	985.118	930.313	1050.05	925.948
1083	Tsga10	104.411	-0.536416	0.147487	-3.63703	0.000275797	0.00381456	80.3236	76.569	75.3135	124.39	111.653	136.372	116.135	120.1	127.025	93.4895	103.297	88.2648
1084	Ogfrl1	3603.36	-0.688335	0.189292	-3.63636	0.000276514	0.00382094	2630.39	2419.94	2360.1	4471.69	4441.52	4146.31	4912.33	4683.89	4752.62	2731.36	2892.31	2797.83
1085	Brd2	8001.2	0.346892	0.0954063	3.63595	0.00027696	0.00382358	9413.08	9515.93	9660.6	6794.48	6976.75	7218.5	6914.36	6784.07	6994.47	8269.24	8803.82	8669.1
1086	Grcc10	601.187	-0.521752	0.143528	-3.63519	0.000277775	0.00383129	429.52	462.085	469.891	563.562	532.655	507.179	677.742	627.652	618.908	851.488	713.318	760.243
1087	Klhl6	162.047	-0.745886	0.205335	-3.63253	0.000280653	0.00386744	108.225	108.621	105.603	143.429	146.48	136.372	226.203	228.712	263.509	147.567	170.806	159.043
1088	Shcbp1	1875.41	-0.22506	0.0619977	-3.63013	0.000283278	0.00390002	1639.45	1695.2	1656.08	2098.13	2030.23	1961.3	2002.03	2060.5	1964.83	1828.55	1797.53	1771.12
1089	Zfp704	166.364	-2.62527	0.723528	-3.62844	0.000285144	0.0039221	30.4384	38.2845	33.5636	237.356	234.573	197.662	378.738	362.388	355.399	38.4957	54.4952	34.9728
1090	Btbd19	185.938	-0.461431	0.127317	-3.62428	0.000289767	0.00398204	143.737	146.906	142.441	209.432	204.867	252.824	226.203	198.426	185.132	182.396	175.686	163.207
1091	Ago3	618.812	0.329683	0.0910734	3.61997	0.00029464	0.00404376	811.691	740.761	642.621	519.137	517.29	537.825	631.809	590.056	622.962	572.853	608.394	630.344
1092	Hyls1	373.748	-0.244923	0.067664	-3.6197	0.00029495	0.00404376	321.294	342.78	320.083	397.286	413.832	398.389	367.472	373.876	383.777	386.79	385.533	393.861
1093	Neat1	847.229	0.784542	0.216749	3.61959	0.000295068	0.00404376	1477.95	1191.27	1041.29	580.063	437.392	625.164	686.409	902.315	543.234	861.57	813.361	1006.72
1094	Iqgap3	3820.21	-0.252274	0.0697078	-3.61903	0.000295715	0.00404892	3273.82	3444.72	3310.52	3687.27	3639.47	3675.9	4079.45	3970.61	3876.96	4071.38	4374.26	4438.22
1095	Snora33	13.6942	1.15182	0.31831	3.61856	0.000296251	0.00405255	32.975	19.5874	18.0098	10.1543	8.19469	9.19358	10.4001	7.31043	9.4593	11.9153	14.6405	12.4903
1096	Man2a1	5483.28	0.231753	0.0640745	3.61694	0.00029811	0.00407426	6430.12	6166.48	5914.57	5169.79	5215.92	5041.15	5655.08	5633.2	5403.96	4551.66	5296.61	5320.87
1097	Cxcl16	2629.67	0.299331	0.08277	3.61642	0.000298709	0.00407873	2962.67	2947.02	3270.41	2318.98	2153.15	2466.95	2495.17	2311.14	2608.06	2783.61	2435.2	2803.66
1098	Stk38	2068.79	0.246571	0.068187	3.6161	0.000299074	0.00407999	2521.32	2305.97	2211.11	1839.19	1798.73	1906.14	1931.83	1934.13	2060.78	2046.69	2083.83	2185.8
1099	1810058I24Rik	928.634	-0.326283	0.0902612	-3.61487	0.000300497	0.00409567	827.756	738.98	770.326	1097.93	1106.28	1045	932.546	962.887	1018.9	863.403	870.296	909.294
1100	Fhl3	2160.74	0.207343	0.0573886	3.61296	0.000302724	0.00412228	2374.2	2483.15	2343.72	2155.24	2049.7	2100.73	2104.29	2244.3	2222.93	1924.78	1941.49	1984.29
1101	Entpd6	692.234	0.387497	0.107282	3.61194	0.000303913	0.0041347	860.731	831.575	833.361	558.485	591.042	619.035	579.808	595.277	599.99	722.253	780.827	734.43
1102	Lncpint	256.721	-0.89672	0.248348	-3.61074	0.000305325	0.00415015	194.468	153.138	121.157	210.701	195.648	237.501	245.27	344.634	217.564	357.46	368.453	434.662
1103	Yy2	218.787	0.563932	0.156197	3.61039	0.000305738	0.00415199	295.084	298.263	275.877	168.815	180.283	190.001	164.669	167.095	155.403	249.305	237.501	243.145
1104	Senp2	2365.62	0.219729	0.0608977	3.60816	0.000308381	0.0041841	2716.63	2595.33	2628.61	2232.67	2279.15	2266.22	2093.89	2076.16	2217.53	2362.9	2466.11	2452.26
1105	Bola2	599.902	0.337905	0.0936752	3.6072	0.000309525	0.00419202	656.962	698.025	780.969	545.792	540.85	562.341	533.007	500.242	512.153	658.093	575.046	635.34
1106	Mettl7a1	395.99	-0.398644	0.11051	-3.60733	0.00030937	0.00419202	301.848	336.548	319.264	423.941	416.905	407.582	471.473	449.069	504.045	413.37	348.118	359.721
1107	Klhl42	553.067	-0.284179	0.0787915	-3.60672	0.00031009	0.00419588	465.877	492.357	467.435	562.293	556.215	574.599	634.409	645.406	616.206	513.276	542.512	566.227
1108	Kansl3	1174.66	-0.260281	0.0721918	-3.60541	0.000311659	0.0042133	988.403	1023	1053.57	1285.78	1302.96	1300.89	1230.68	1289.77	1268.9	1102.63	1077.7	1171.59
1109	2310061I04Rik	407.776	0.373782	0.103707	3.60423	0.000313085	0.00422877	497.161	472.769	510.004	326.206	332.909	352.421	377.872	381.186	344.589	433.535	441.655	423.005
1110	Gm36995	441.751	-0.673819	0.187008	-3.60315	0.000314384	0.00424248	307.766	292.031	315.171	558.485	574.653	525.567	568.541	551.415	563.504	365.709	335.105	343.067
1111	Smarcad1	2045.01	-0.327373	0.0908796	-3.60227	0.000315447	0.004253	1806.86	1687.19	1654.44	2317.71	2267.88	2237.11	2314.9	2256.83	2312.12	1752.47	1932.55	2000.11
1112	Pcdhga12	123.043	-0.475834	0.132156	-3.60056	0.000317535	0.00427729	94.6973	89.0338	99.8723	144.698	141.358	163.952	141.269	129.499	124.322	110.904	122.004	114.911
1113	Efhd1	31.2665	-1.20377	0.334386	-3.59994	0.000318295	0.00428369	14.3737	16.0261	17.1911	39.3478	43.0221	44.4357	26.867	20.8869	16.2159	49.4945	39.0413	48.2958
1114	Gm28778	483.588	-0.286459	0.0795856	-3.59939	0.000318968	0.00428791	399.081	451.401	395.396	470.904	535.728	525.567	497.473	462.645	518.91	565.52	510.791	469.635
1115	Abcb6	1068.12	0.204631	0.0568544	3.59921	0.000319182	0.00428791	1126.22	1149.43	1279.51	981.156	1087.85	1020.49	984.547	1045.39	1094.58	994.472	1034.6	1019.21
1116	Mcat	490.191	-0.27263	0.0757577	-3.59871	0.000319799	0.00429235	399.927	431.814	440.42	486.136	532.655	545.486	490.54	480.399	483.775	581.102	491.27	518.764
1117	Pnrc2	2459.27	-0.224689	0.0624466	-3.5981	0.000320557	0.00429867	2147.6	2285.5	2113.69	2595.69	2717.56	2658.48	2671.97	2609.82	2647.25	2373.9	2343.29	2346.51
1118	Pcdhga8	123.302	-0.485082	0.134837	-3.59754	0.000321244	0.00430404	94.6973	88.1434	99.8723	144.698	142.383	165.485	142.135	129.499	125.674	111.821	123.631	111.58
1119	Pithd1	837.327	0.253153	0.0703844	3.59672	0.000322249	0.00431364	862.422	978.481	1011.82	825.035	809.226	855.003	832.011	832.344	814.851	756.165	734.465	736.095
1120	Pcdhga5	122.998	-0.480764	0.133712	-3.59551	0.000323756	0.00432994	94.6973	88.1434	99.8723	145.968	141.358	163.952	142.135	128.455	124.322	111.821	122.004	113.245
1121	Surf4	5933.85	0.161198	0.0448477	3.59434	0.000325217	0.0043456	6397.14	6363.24	6579.29	5556.92	5469.96	5411.96	5898.61	5629.03	6037.73	5933.84	5914.76	6013.66
1122	Brpf1	2807.42	-0.325468	0.0905858	-3.59293	0.000326987	0.00436536	2325.16	2426.17	2324.9	3147.82	3177.49	3139.61	3100.11	3269.85	3032.38	2474.72	2665.38	2605.48
1123	Mecom	12.0654	-1.88045	0.523687	-3.59079	0.000329676	0.00439734	5.91858	1.78068	4.09313	17.77	12.292	19.9194	18.2002	19.8426	13.5133	17.4147	4.88017	9.15955
1124	Pcdhgb8	127.318	-0.47397	0.132073	-3.5887	0.000332333	0.00442883	98.0793	91.7048	103.965	148.506	142.383	167.017	147.335	133.676	136.484	113.654	131.764	113.245
1125	Hhat	35.895	-0.871773	0.242948	-3.58831	0.000332823	0.00443142	26.2109	24.0391	15.5539	43.1557	33.8031	62.8228	33.8005	40.7295	33.7832	40.3288	39.0413	37.4709
1126	Thumpd2	140.445	0.366541	0.102271	3.58402	0.000338347	0.00450098	175.021	173.616	159.632	142.16	137.261	119.517	123.068	137.854	109.458	141.151	134.205	132.397
1127	Gm45216	458.742	-0.308169	0.0860288	-3.58216	0.000340766	0.00452512	353.424	430.033	385.573	481.059	530.606	488.792	468.873	456.379	425.668	535.274	492.083	457.145
1128	Slc36a4	2794.61	0.22018	0.0614621	3.58237	0.000340487	0.00452512	3192.65	3064.54	3124.69	2481.45	2459.43	2741.22	2585.3	2620.27	2691.85	2772.61	2804.47	2996.84
1129	Pcdhga9	122.959	-0.480673	0.134204	-3.58166	0.000341414	0.00452971	95.5428	87.2531	99.8723	144.698	141.358	163.952	143.002	128.455	124.322	111.821	122.818	112.413
1130	Zcwpw1	81.7879	-0.860106	0.240348	-3.57859	0.000345453	0.00457924	43.1211	53.4203	56.4851	86.3113	97.3119	67.4196	71.0676	64.7495	81.0797	133.818	97.6033	129.066
1131	Rpia	728.607	-0.271461	0.0758916	-3.57696	0.000347616	0.00459874	619.76	627.688	640.984	878.344	808.201	792.181	708.076	784.304	755.392	712.17	710.064	706.118
1132	Abca3	2313.53	0.208213	0.0582087	3.577	0.000347554	0.00459874	2603.33	2504.52	2615.51	2161.59	2117.3	2207.99	2181.43	2194.17	2066.18	2252.91	2368.51	2488.9
1133	Fbxl17	790.98	0.200084	0.0559395	3.57679	0.000347845	0.00459874	867.495	886.776	874.292	775.532	744.692	755.406	818.144	718.51	781.068	741.5	720.638	807.706
1134	Tmem43	2064.57	-0.209731	0.0587136	-3.5721	0.000354137	0.00467779	1838.14	1793.14	1909.85	2117.17	2143.94	2021.06	2216.96	2214.01	2397.26	2000.86	2077.32	2045.08
1135	Nanos1	614.058	-0.852632	0.23874	-3.57138	0.000355108	0.00468648	369.489	391.749	386.391	783.148	751.863	640.486	934.279	835.477	935.119	476.613	431.081	432.997
1136	Pitpna	7823.3	0.139781	0.0391561	3.56984	0.000357199	0.00470869	8445.81	8258.77	8505.52	7581.43	7473.56	7809.95	8036.71	7660.28	8013.38	7382.01	7381.25	7330.97
1137	Npc1	2974.38	0.320043	0.0896674	3.56922	0.000358048	0.00470869	3562.14	3525.74	3404.66	2703.57	2704.25	2656.95	2641.64	2541.94	2528.33	2875.26	3196.51	3351.56
1138	Myof	3920.92	0.391375	0.109642	3.56957	0.000357569	0.00470869	4688.36	4609.28	5017.35	3329.33	3452.01	3858.24	3161.64	3091.27	3382.37	3833.99	4179.86	4447.38
1139	Cep55	2268.24	-0.286615	0.0802979	-3.56939	0.000357811	0.00470869	1961.59	1892.86	1983.53	2491.6	2513.72	2557.35	2455.3	2514.79	2508.07	2053.1	2196.89	2090.04
1140	Dock4	1218.09	-0.518073	0.145199	-3.56802	0.000359693	0.00472617	978.257	850.272	929.958	1436.83	1422.8	1369.84	1487.22	1558.16	1460.79	941.311	1085.84	1095.82
1141	Kif2c	1477.17	-0.205417	0.0575921	-3.56675	0.000361429	0.00473239	1368.04	1313.25	1290.15	1586.6	1643.04	1579.76	1564.35	1497.59	1581.05	1423.42	1463.24	1415.57
1142	Agbl3	68.4805	-0.566284	0.158747	-3.5672	0.00036081	0.00473239	43.9666	63.214	45.0244	74.8878	76.8252	58.226	78.001	72.0599	78.377	72.4086	81.3361	77.4399
1143	Ctnnb1	18757.9	0.200655	0.0562539	3.56696	0.000361145	0.00473239	20566.2	20313.1	21468.4	17654.5	17422.9	18304.4	17558	16623.9	17399.7	19808.8	18656.9	19317.5
1144	Mta3	862.137	0.199484	0.0559189	3.56739	0.000360556	0.00473239	986.712	883.215	993.811	860.574	824.591	813.632	816.411	783.26	839.175	814.826	878.43	851.006
1145	Nudt8_2	112.42	-0.614857	0.172528	-3.5638	0.00036552	0.00478177	65.9499	73.0077	102.328	126.928	141.358	122.581	101.401	96.0799	105.404	146.65	137.458	129.899
1146	Pcdhga7	122.892	-0.478909	0.134427	-3.56261	0.000367192	0.00479946	94.6973	88.1434	99.8723	145.968	141.358	163.952	141.269	128.455	125.674	110.904	122.004	112.413
1147	Mnt	894.926	-0.26189	0.0735321	-3.56158	0.000368636	0.00481413	754.196	777.265	807.165	865.652	908.586	871.858	992.347	1005.71	929.714	836.823	959.766	1030.03
1148	Pcdhgc5	123.137	-0.48806	0.137152	-3.55854	0.00037292	0.00486583	94.6973	87.2531	99.8723	144.698	143.407	167.017	141.269	128.455	125.674	110.904	122.818	111.58
1149	Rdm1	169.836	-0.566934	0.159403	-3.55662	0.000375662	0.00489733	115.835	134.441	123.612	199.278	186.429	179.275	232.27	218.268	194.591	154.899	131.764	167.37
1150	Pcdhgc4	122.949	-0.485324	0.136555	-3.55405	0.000379344	0.00494103	94.6973	87.2531	99.8723	145.968	141.358	165.485	142.135	128.455	125.674	110.904	122.004	111.58
1151	Cdk10	250.277	-0.383286	0.107862	-3.55348	0.000380172	0.00494323	205.459	195.874	209.568	274.165	259.157	254.356	312.871	302.86	268.914	230.974	230.995	258.133
1152	Zbtb20	459.846	-0.478724	0.134715	-3.55361	0.000379984	0.00494323	390.626	379.284	296.342	412.517	401.54	468.873	533.007	540.971	547.288	438.118	506.724	602.865
1153	Stab1	10535.2	-2.56626	0.722259	-3.55311	0.00038071	0.00494593	2212.7	2290.84	2232.39	16443.6	15874.1	15154.1	22297	21714.1	20924	2328.07	2356.31	2595.48
1154	Tomm34	1075.36	0.162879	0.0458522	3.55226	0.000381936	0.00495756	1182.03	1160.11	1164.9	1024.31	1086.82	1048.07	1011.41	1105.96	1017.55	999.972	1057.37	1045.85
1155	Hpf1	1260.09	-0.267298	0.0752546	-3.55191	0.000382445	0.00495986	1104.24	1100.46	1071.58	1434.29	1462.75	1394.36	1230.68	1331.54	1321.6	1172.29	1190.76	1306.49
1156	Prss50	692.63	-0.350904	0.0987997	-3.55167	0.000382788	0.00496002	546.2	574.268	598.415	762.84	787.715	877.987	643.075	652.717	763.5	735.084	631.168	738.593
1157	Ccl9	12535	0.505955	0.142517	3.55013	0.000385035	0.00498296	15789.1	15826.6	16711.4	10853.6	10708.4	12098.8	8844.45	8701.49	10391.7	14168.2	12398.9	13926.7
1158	Pcdhgc3	122.804	-0.477666	0.134554	-3.55001	0.000385224	0.00498296	94.6973	88.1434	99.8723	144.698	141.358	163.952	141.269	129.499	125.674	110.904	122.004	111.58
1159	Ric8a	969.659	0.195987	0.0552299	3.54856	0.000387338	0.00500167	1027.3	1098.68	1092.05	889.768	931.122	942.342	916.079	876.207	920.254	1011.89	943.499	986.734
1160	Agpat3	765.786	-0.894326	0.252024	-3.54857	0.00038733	0.00500167	463.34	477.221	455.974	1063.66	1002.83	1017.42	1059.95	1051.66	1039.17	522.442	494.523	541.246
1161	Fer	925.974	0.197535	0.0556723	3.54818	0.00038791	0.00500474	1040.82	989.165	1042.93	943.078	878.88	879.52	949.879	828.167	897.282	840.489	929.672	891.807
1162	Snora61	16.2971	1.00879	0.284453	3.54641	0.000390521	0.00503409	28.7474	24.9295	25.3774	11.4236	6.14602	12.2581	13.0002	9.39912	14.8646	16.4982	16.2672	16.6537
1163	Iah1	535.779	0.266304	0.075234	3.53967	0.000400625	0.0051599	600.313	598.307	642.621	516.599	508.071	527.099	481.873	465.779	455.398	574.686	514.857	543.744
1164	Spout1	542.202	-0.232776	0.0657771	-3.53886	0.000401861	0.00517137	448.967	492.357	496.906	548.331	536.752	539.357	582.408	594.233	583.774	602.183	546.579	534.585
1165	Mtmr12	1290.63	-0.196973	0.0556918	-3.53684	0.000404952	0.00520667	1137.21	1169.9	1180.46	1349.25	1299.88	1326.94	1395.35	1369.14	1404.03	1186.03	1305.44	1363.94
1166	Grpel1	1235.77	0.192887	0.0545722	3.53452	0.000408512	0.00524794	1268.27	1408.51	1411.31	1175.36	1242.52	1256.46	1171.75	1148.78	1212.14	1252.03	1135.45	1146.61
1167	Samd4	110.353	-1.06435	0.301157	-3.53418	0.000409041	0.00525023	50.7307	61.4333	69.5832	114.236	104.482	121.049	193.269	178.583	183.781	66.9092	91.9098	88.2648
1168	Tmc3	5.679	1.77269	0.501716	3.53326	0.000410471	0.00526408	12.6827	12.4647	9.8235	5.07714	4.09734	9.19358	2.60003	3.13304	4.05398	0.916564	2.44008	1.66537
1169	Zbtb40	300.876	0.330641	0.0936054	3.53229	0.000411976	0.00527886	406.691	328.535	333.181	267.819	272.473	240.565	276.47	305.994	295.941	311.632	280.61	290.608
1170	Miip	463.681	-0.257478	0.0729046	-3.53171	0.000412876	0.00528136	393.163	438.936	383.935	455.673	473.243	484.195	484.473	517.996	445.938	461.948	505.911	518.764
1171	Dock2	10079.1	-0.100958	0.0285856	-3.53178	0.000412772	0.00528136	9529.76	9706.46	9437.93	10207.6	10406.2	10339.7	10459.9	10220	10566	9817.32	10157.3	10101.3
1172	Dnph1	620.135	0.240292	0.0680695	3.5301	0.000415395	0.00530904	675.564	706.928	715.479	649.873	647.38	640.486	557.274	567.08	577.017	575.602	568.539	560.398
1173	Pld4	5261.96	0.402024	0.113942	3.52832	0.000418212	0.0053405	6107.13	6528.85	6674.25	4948.94	4464.06	4655.02	4421.79	3938.23	4435.06	5662.53	5474.73	5832.97
1174	Tbcc	328.691	0.348583	0.0988743	3.52552	0.000422652	0.00539259	374.562	423.801	379.842	312.244	296.033	260.485	300.737	308.082	293.238	384.04	313.957	297.269
1175	Il3ra	115.251	-0.506852	0.143788	-3.52499	0.000423497	0.00539357	88.7787	82.8014	90.8674	126.928	107.555	107.258	152.535	132.632	152.7	114.571	109.804	116.576
1176	Atp6v0c	2432.59	0.405831	0.115136	3.5248	0.000423809	0.00539357	2628.7	3081.46	3235.21	2049.89	1900.14	2002.67	2209.16	2080.34	2239.15	2653.45	2390.47	2720.39
1177	Tlr13	7957.66	0.31961	0.0906709	3.52495	0.000423564	0.00539357	9105.31	9645.03	9307.77	7512.89	7570.87	6948.82	7018.36	6442.57	6749.88	8599.21	8414.22	8176.98
1178	Il12rb2	318.464	-0.337283	0.095705	-3.5242	0.00042477	0.00539663	291.701	269.772	237.401	357.938	341.104	304.921	321.538	363.433	328.373	291.467	372.519	341.402
1179	R74862	50.1227	0.706894	0.200576	3.52433	0.000424555	0.00539663	80.3236	54.3106	77.7694	50.7714	40.9734	39.8389	41.6006	29.2417	37.8372	53.1607	39.8547	55.79
1180	Bco2	40.5934	-0.802875	0.227919	-3.52263	0.000427292	0.00542055	27.0564	28.4908	22.1029	57.1178	48.1438	62.8228	43.3339	30.286	36.4859	44.9116	44.7349	41.6343
1181	Tmem134	464.745	-0.321154	0.0911704	-3.52257	0.000427376	0.00542055	359.342	387.297	429.778	493.751	447.635	456.615	459.34	464.734	459.452	557.271	523.804	537.916
1182	Zfp36	3605.91	0.774218	0.219881	3.52107	0.000429805	0.00544674	5944.79	5076.7	4693.18	2722.61	2366.22	1726.86	3776.98	2998.32	2422.93	4128.21	4072.5	3341.57
1183	E230001N04Rik	17.6506	-1.41227	0.401181	-3.52027	0.000431101	0.00545854	13.5282	5.34203	4.91175	17.77	21.5111	21.4517	15.6002	12.5322	14.8646	27.4969	27.6543	29.144
1184	Rpusd1	204.221	0.311564	0.0885216	3.51963	0.000432142	0.00546711	229.134	240.391	250.499	199.278	182.332	176.21	199.336	181.716	175.673	199.811	213.101	203.176
1185	Dusp11	4661.34	-0.237366	0.0675032	-3.51637	0.000437483	0.00553	4225.87	4163.22	3944.96	4536.42	4600.29	4651.95	4531.86	4794.59	4713.43	5086.93	5159.15	5527.37
1186	Tsc2	1880.81	0.229772	0.0653648	3.51523	0.000439371	0.00554919	2164.51	2102.09	2081.76	1726.23	1712.69	1682.43	1809.62	1720.04	1782.4	1778.13	2047.23	1962.64
1187	Amigo2	153.914	0.456689	0.129999	3.51302	0.000443046	0.00558756	207.996	173.616	195.651	139.621	153.65	147.097	156.002	142.031	171.619	119.153	109.804	130.732
1188	Clpp	498.064	0.336327	0.095739	3.51295	0.000443155	0.00558756	536.054	596.526	641.802	427.749	448.659	418.308	480.14	430.271	441.884	523.358	547.392	484.624
1189	Ap1s3	3875.49	-0.389585	0.110926	-3.51212	0.000444539	0.00559089	3227.32	3116.18	3087.04	4348.57	4444.59	4544.7	4442.59	4441.61	4544.52	3341.79	3438.89	3528.09
1190	Gpr107	1561.27	0.180475	0.0513799	3.51257	0.000443802	0.00559089	1747.67	1691.64	1697.83	1559.95	1442.27	1558.31	1475.95	1383.76	1470.25	1568.24	1538.07	1601.26
1191	Ephb6	34.4575	-0.822921	0.234303	-3.5122	0.000444408	0.00559089	18.6013	26.7101	20.4656	30.4628	46.0951	33.7098	41.6006	42.8182	45.9452	34.8294	43.1081	29.144
1192	Ube2i	4442.87	0.248707	0.0708567	3.51	0.000448111	0.00563109	5172.84	4954.73	5002.62	4023.63	4057.4	4088.08	4069.92	4040.58	3905.34	4610.32	4780.94	4608.09
1193	Tex9	111.345	-0.529221	0.150866	-3.50789	0.000451672	0.00567108	89.6242	96.1565	65.49	109.158	131.115	134.839	112.668	104.435	113.512	114.571	149.658	114.911
1194	Rcn3	58.0738	0.62949	0.179476	3.50737	0.000452561	0.00567273	68.4864	81.9111	88.4115	54.5792	37.9004	35.2421	64.1342	59.5277	45.9452	52.2442	59.3754	49.1285
1195	Fahd1	176.289	0.47491	0.1354	3.50747	0.000452392	0.00567273	220.679	210.12	239.857	163.738	114.726	140.968	155.135	169.184	172.97	180.563	197.647	149.884
1196	Ptk2	2083.46	0.174208	0.0496962	3.50545	0.000455838	0.00570903	2336.15	2204.48	2289.7	2039.74	2112.18	2135.98	1868.56	1895.49	1976.99	2036.61	2044.79	2060.9
1197	Ipo4	700.281	0.189479	0.0540644	3.50468	0.000457149	0.00571589	742.359	769.252	801.434	679.067	690.403	692.583	685.543	666.293	681.069	628.763	658.822	707.784
1198	Pcdhga10	123.356	-0.470481	0.134241	-3.50475	0.000457041	0.00571589	95.5428	88.1434	101.51	145.968	142.383	163.952	142.135	128.455	124.322	111.821	123.631	112.413
1199	Donson	723.264	0.234615	0.0669671	3.50344	0.000459286	0.00573782	805.773	811.098	831.723	665.105	731.376	669.599	630.942	679.87	647.286	701.172	747.479	757.745
1200	Pcdhga11	122.907	-0.4747	0.13552	-3.5028	0.000460398	0.00574692	94.6973	87.2531	101.51	144.698	143.407	163.952	141.269	128.455	124.322	110.904	122.004	112.413
1201	Ccdc22	438.811	-0.655199	0.18708	-3.50224	0.000461362	0.00575415	309.457	295.592	313.534	567.37	570.555	522.502	557.274	537.838	556.747	365.709	329.411	339.736
1202	Nomo1	4383.71	0.180031	0.0514135	3.50163	0.000462415	0.00576249	4749.24	4709	4955.96	4314.3	4289.92	4429.78	4347.26	4386.26	4370.2	3822.07	3983.03	4247.53
1203	Cit	751.471	-0.255985	0.0731673	-3.49863	0.000467654	0.00582293	694.165	680.218	594.322	784.417	766.203	795.245	801.677	870.985	737.825	704.838	813.361	774.399
1204	Pcdhga2	123.17	-0.473131	0.135287	-3.49724	0.000470107	0.00584862	94.6973	87.2531	102.328	145.968	141.358	163.952	142.135	128.455	125.674	111.821	122.818	111.58
1205	mt-Tf	25.7861	0.80432	0.230003	3.497	0.000470527	0.00584899	43.1211	29.3811	41.7499	19.0393	22.5354	22.984	17.3336	18.7982	17.5673	28.4135	26.0276	22.4825
1206	Eme2	389.279	0.502118	0.143931	3.48861	0.000485535	0.00603053	486.169	527.97	487.082	308.436	288.863	309.517	311.138	331.058	324.319	414.287	461.176	421.339
1207	Samd14	11.5546	-2.87883	0.825607	-3.48692	0.000488615	0.00606377	1.69102	2.67101	1.63725	19.0393	24.5841	16.8549	27.7337	20.8869	13.5133	1.83313	4.88017	3.33075
1208	Gm44503	1095.04	-0.190915	0.05476	-3.48639	0.00048958	0.00607071	996.858	1014.98	957.792	1166.47	1092.97	1162.99	1134.48	1005.71	1148.63	1155.79	1167.99	1135.78
1209	Pcdhga3	123.549	-0.472968	0.135804	-3.48272	0.000496352	0.0061496	94.6973	88.1434	102.328	144.698	143.407	165.485	142.135	128.455	127.025	111.821	122.818	111.58
1210	Mex3c	1305.53	-0.200584	0.0576029	-3.48219	0.000497336	0.0061567	1201.47	1124.5	1192.74	1427.94	1356.22	1345.33	1408.35	1344.07	1437.81	1252.03	1244.44	1331.47
1211	Cpt2	331.582	-0.278933	0.0801111	-3.48182	0.000498012	0.00615997	267.182	284.908	304.529	341.437	363.639	381.534	360.538	304.949	336.481	338.212	338.358	357.223
1212	Srsf7	3961.54	0.171716	0.0493501	3.47955	0.000502252	0.00620729	4540.4	4272.73	4158.62	4041.4	3868.92	4068.16	3860.19	3827.53	3717.5	3931.14	3680.46	3571.39
1213	Irf7	183.889	-0.722071	0.207557	-3.47891	0.000503466	0.00621716	120.908	123.757	126.068	261.472	248.914	235.969	158.602	129.499	144.592	249.305	193.58	214
1214	Htra2	1610.33	-0.148307	0.0426414	-3.478	0.000505167	0.00623303	1461.04	1474.4	1529.19	1623.41	1607.18	1720.73	1605.09	1746.15	1645.92	1668.15	1600.69	1642.06
1215	Cuedc2	1471.65	-0.17005	0.0489204	-3.47606	0.000508842	0.0062732	1297.86	1372.9	1367.1	1497.76	1559.04	1483.23	1487.22	1468.35	1495.92	1626.9	1437.21	1566.28
1216	Gm45719	25.0388	0.79247	0.228112	3.47404	0.000512675	0.00631526	31.2839	47.1879	32.745	15.2314	22.5354	18.3872	24.267	20.8869	18.9186	22.9141	21.9607	24.1479
1217	Abhd6	51.6542	-7.81684	2.25096	-3.47267	0.000515308	0.00634248	0.845512	0	0	107.889	89.1173	116.452	96.2013	87.7251	121.62	0	0	0
1218	Ankrd26	1258.29	-0.245037	0.0706182	-3.46988	0.000520686	0.00640341	1214.15	1077.31	1026.56	1223.59	1330.61	1268.71	1248.88	1354.52	1193.22	1406.93	1382.71	1372.27
1219	Rnf149	3577.84	-0.186087	0.0536568	-3.4681	0.000524148	0.00643713	3216.33	3133.1	3373.56	3628.88	3561.62	3905.74	3678.18	3881.84	3983.72	3454.53	3557.64	3558.9
1220	Triobp	811.341	-0.234856	0.0677202	-3.46803	0.000524287	0.00643713	678.1	743.432	728.577	836.458	779.52	812.1	887.479	913.803	862.147	762.581	845.082	886.811
1221	Txnrd3	478.668	-0.414417	0.119536	-3.46688	0.000526539	0.00645949	399.927	360.587	390.484	449.327	468.122	471.937	463.673	441.759	502.694	590.267	616.528	588.709
1222	Cluap1	156.903	-0.40312	0.116372	-3.46407	0.000532069	0.00652198	140.355	120.196	118.701	171.353	196.673	173.146	149.935	175.45	136.484	162.232	165.112	173.199
1223	Matn2	12.0146	-6.6739	1.92688	-3.46357	0.000533054	0.00652871	0	0	0	24.1164	13.3164	16.8549	26.867	32.3747	29.7292	0.916564	0	0
1224	Repin1	245.289	-0.317954	0.0918606	-3.46127	0.000537637	0.00657947	224.906	190.532	204.656	269.088	262.23	231.372	240.937	279.885	289.184	241.973	248.075	260.631
1225	Prrc2a	13366.3	0.186805	0.0539759	3.46089	0.000538389	0.00658328	14956.3	14649.6	14513.4	12928.9	12581.9	12754.6	13287	13388.5	12783.6	11375.5	13617.3	13558.6
1226	Abcg1	3970.31	0.611668	0.176791	3.45983	0.000540511	0.00659846	5335.18	5404.35	5340.71	2725.15	2776.98	3112.03	2915.51	2962.81	3440.48	4627.73	4319.76	4683.03
1227	Bbs1	64.3366	-0.570013	0.164742	-3.46004	0.000540087	0.00659846	48.1942	47.1879	46.6616	59.6563	72.7279	64.3551	78.8677	60.5721	81.0797	62.3264	82.9628	67.4476
1228	Elk3	1168.89	-0.238792	0.0691251	-3.45449	0.000551327	0.00672502	1078.03	975.81	1038.84	1205.82	1143.16	1052.67	1267.08	1193.69	1281.06	1199.78	1319.27	1271.51
1229	Lypla1	2311.96	-0.375852	0.10881	-3.45419	0.000551954	0.00672719	1974.27	1907.1	1786.24	2621.07	2505.53	2759.61	2656.37	2693.37	2629.68	2112.68	2103.35	1994.28
1230	Apex2	284.982	0.267672	0.0775102	3.45337	0.000553619	0.006742	320.449	341.89	315.171	298.282	258.133	281.937	268.67	249.599	279.725	273.136	250.515	282.281
1231	Kat14	2776.71	0.180878	0.0524312	3.44982	0.000560951	0.00682574	3084.43	2938.11	3112.41	2769.58	2827.17	2774.93	2762.97	2705.9	2610.77	2416.98	2743.47	2573.83
1232	Stoml1	138.098	-0.409982	0.118864	-3.44918	0.000562299	0.00683658	91.3152	131.77	110.514	134.544	142.383	137.904	146.469	158.741	145.943	160.399	143.152	154.047
1233	Zbtb8a	75.5084	-1.10833	0.321407	-3.44837	0.000563974	0.00685139	42.2756	41.8459	36.8381	102.812	110.628	84.2745	113.535	112.789	116.214	41.2454	53.6818	49.9612
1234	Zfp282	758.392	-0.440033	0.127638	-3.4475	0.000565797	0.00686797	579.175	591.184	622.974	841.535	861.467	841.213	942.079	901.271	931.065	660.843	675.903	651.994
1235	Igsf11	5.70721	1.74164	0.505464	3.44563	0.000569732	0.00691014	12.6827	10.6841	12.2794	2.53857	2.04867	7.66132	0.866678	1.04435	4.05398	6.41595	4.88017	3.33075
1236	Ube2v2	332.845	0.315075	0.091479	3.44424	0.000572675	0.00694021	409.228	363.258	398.671	297.012	312.423	321.775	287.737	292.417	317.562	305.216	306.637	382.203
1237	Pdzd11	782.966	-0.300679	0.0873406	-3.44261	0.000576136	0.00697651	674.718	662.411	660.631	871.998	912.684	888.713	832.011	840.699	867.553	732.335	751.546	700.289
1238	Aff4	4361.45	-0.151077	0.043892	-3.44202	0.000577386	0.006986	4121.87	4061.72	3901.57	4307.95	4432.3	4549.29	4279.66	4582.59	4470.19	4247.36	4687.4	4695.52
1239	Dtx3l	693.489	-0.262708	0.0763315	-3.44167	0.000578132	0.00698938	599.468	616.114	590.229	750.147	797.958	795.245	669.942	688.224	768.906	642.512	698.677	704.453
1240	Laptm4b	374.544	0.269121	0.0782252	3.44034	0.000580988	0.00701824	443.048	437.156	410.131	331.283	328.812	357.018	367.472	324.792	356.751	389.54	352.999	395.526
1241	Cep89	504.507	-0.31384	0.0912991	-3.43749	0.000587134	0.00708676	398.236	436.265	443.695	587.678	563.385	517.905	560.741	561.858	564.855	478.447	487.203	453.814
1242	Maged2	190.769	1.09115	0.317492	3.43678	0.000588681	0.00709971	288.319	300.044	364.288	129.467	106.531	95.0004	102.268	96.0799	102.701	239.223	217.167	248.141
1243	Pcdhgb2	124.621	-0.460772	0.134094	-3.43619	0.000589951	0.00710932	94.6973	93.4854	101.51	147.237	143.407	165.485	143.002	132.632	127.025	110.904	122.818	113.245
1244	Tk2	488.256	-0.256078	0.0746008	-3.43265	0.000597721	0.00719138	407.537	445.169	426.504	512.791	458.903	505.647	488.807	472.045	532.423	529.774	512.417	567.06
1245	Snai2	54.6136	-1.12674	0.328223	-3.43286	0.000597259	0.00719138	29.5929	23.1488	33.5636	83.7727	66.5819	67.4196	94.4679	74.1486	72.9717	43.0785	34.9745	31.6421
1246	Gpr155	324.6	0.326034	0.0950008	3.43191	0.000599356	0.00719372	379.635	380.174	391.303	271.627	327.788	268.146	270.404	293.461	306.751	321.714	326.971	357.223
1247	Stat2	643.452	-0.312695	0.0911075	-3.43216	0.000598795	0.00719372	518.299	562.693	549.298	684.144	705.768	786.052	645.675	686.136	735.123	554.521	642.555	651.161
1248	Nrip1	904.62	-0.313741	0.0914142	-3.43208	0.000598962	0.00719372	832.829	738.09	724.483	932.924	975.168	916.294	1087.68	1024.5	1004.04	801.994	959.766	857.667
1249	Cnih4	1582.85	0.192223	0.0560196	3.43136	0.000600569	0.0072025	1751.05	1772.66	1714.2	1497.76	1698.35	1529.2	1505.42	1503.86	1518.89	1620.49	1455.1	1427.22
1250	Abi2	1547.64	-0.198485	0.0578735	-3.42964	0.000604374	0.00724234	1484.72	1415.64	1278.69	1589.14	1567.23	1665.57	1618.96	1619.78	1651.32	1455.5	1570.6	1654.55
1251	Calr	28344	0.18903	0.0551205	3.42939	0.000604936	0.00724328	32160.7	31018.5	30484.8	26750.2	27264.8	26692	26527.3	25556.2	25983.3	29020.3	30147.2	28522.8
1252	Dcaf12	1728.72	0.180547	0.0526904	3.42656	0.000611282	0.00731321	1997.1	1828.75	1864.01	1698.3	1636.89	1552.18	1684.82	1600.98	1758.08	1738.72	1614.52	1770.29
1253	Appbp2	1984.49	0.261762	0.0763967	3.42635	0.000611753	0.00731321	2393.64	2167.08	2237.3	1957.24	1875.56	1849.44	2018.49	2053.19	1993.21	1566.41	1847.14	1855.23
1254	Ift46	943.385	-0.178898	0.0522211	-3.42577	0.00061305	0.00732287	826.065	820.001	927.503	983.695	956.73	982.181	967.213	1009.88	958.092	937.645	989.86	961.753
1255	Pycard	833.96	0.260888	0.0762035	3.42357	0.000618034	0.00737652	895.397	950.881	1009.37	823.765	901.416	790.648	782.611	722.688	764.852	869.819	746.665	749.418
1256	Sla	359.591	-0.590832	0.172625	-3.42263	0.000620176	0.00739619	264.645	267.992	248.043	506.444	486.56	473.47	424.672	364.477	355.399	294.217	329.411	299.767
1257	Ccdc181	179.712	-0.369919	0.108127	-3.42116	0.000623538	0.00743038	158.111	152.248	131.799	203.085	201.794	211.452	189.803	157.696	168.916	200.728	194.393	186.522
1258	Etnk1	2423.42	-0.231203	0.0675905	-3.42065	0.00062472	0.00743854	2315.86	2055.79	2062.12	2362.14	2328.32	2342.83	2666.77	2739.32	2632.39	2423.4	2513.29	2638.78
1259	Alox5ap	1770.96	0.166976	0.0488239	3.41997	0.000626282	0.0074453	1948.9	1902.65	1940.96	1665.3	1720.88	1544.52	1720.36	1684.53	1816.19	1740.56	1776.38	1790.28
1260	Wdr11	1468.21	0.206516	0.0603834	3.42008	0.000626036	0.0074453	1664.81	1606.17	1618.42	1421.6	1371.59	1507.75	1526.22	1471.48	1467.54	1351.02	1307.07	1304.82
1261	Gm22455	37.4035	0.708089	0.207164	3.41801	0.000630814	0.00749323	43.9666	55.2009	60.5783	33.0014	26.6327	29.113	32.9338	28.1974	21.6213	40.3288	42.2948	34.9728
1262	Rbl1	4754.13	0.180456	0.0528071	3.41727	0.00063252	0.00750754	5392.67	5183.55	5062.38	4663.35	4771.36	4648.89	4742.46	4812.35	4726.95	4086.96	4495.45	4463.2
1263	Igf2r	50.3565	1.00929	0.295456	3.41606	0.00063535	0.00753472	75.2505	73.898	91.686	48.2328	54.2898	73.5487	29.4671	25.0643	29.7292	32.0797	24.4008	46.6305
1264	Ddx39b	4889.28	0.15551	0.045526	3.41586	0.000635816	0.00753472	5348.71	5345.59	5198.27	4809.32	4524.49	4587.6	4755.46	4833.24	4439.11	4783.55	5027.38	5018.6
1265	Kdelr1	1949.31	-0.127808	0.0374234	-3.41519	0.000637364	0.0075471	1830.53	1782.46	1855.01	2038.47	1999.5	1880.09	1971.69	1984.26	2071.59	2015.52	1969.15	1993.45
1266	Timm29	1057.86	0.239459	0.0701641	3.41284	0.000642893	0.00760656	1204.01	1127.17	1250.04	1034.47	1080.67	1003.63	1046.08	1087.16	1074.31	922.98	936.992	926.78
1267	Zfas1	540.893	0.325933	0.0955204	3.41218	0.000644457	0.00761904	614.687	669.534	631.16	519.137	476.316	453.55	479.273	514.863	474.316	643.428	515.671	498.779
1268	4930523C07Rik	8.03699	-1.94839	0.571534	-3.40906	0.000651879	0.00769576	0.845512	5.34203	1.63725	11.4236	14.3407	6.12906	8.66678	7.31043	10.8106	10.9988	8.94697	9.99224
1269	Gm11464	25.2385	0.84545	0.248004	3.40902	0.000651974	0.00769576	47.3486	30.2715	36.8381	22.8471	14.3407	18.3872	21.667	17.7539	14.8646	27.4969	24.4008	26.646
1270	Ropn1l	75.932	-0.51312	0.150601	-3.40714	0.000656468	0.0077427	59.1858	56.9816	56.4851	91.3884	73.7522	70.4842	83.2011	78.326	87.8363	98.9889	83.7762	70.7784
1271	Ifih1	547.133	-0.364558	0.107037	-3.4059	0.000659462	0.00776677	463.34	447.84	438.783	586.409	663.77	628.228	473.206	485.621	549.991	568.27	618.968	641.169
1272	Scamp3	965.536	0.184311	0.0541157	3.40587	0.000659545	0.00776677	1015.46	1045.26	1119.06	986.234	904.489	953.068	935.146	858.453	974.308	913.815	941.872	939.271
1273	Cnot4	1006.47	-0.275797	0.0809881	-3.40541	0.000660656	0.00777374	921.608	860.066	823.537	1119.51	1112.43	1110.89	1138.82	1087.16	1054.04	898.233	967.9	983.403
1274	Mavs	1169.77	-0.155011	0.045522	-3.40519	0.000661189	0.0077739	1092.4	1079.09	1061.76	1262.94	1206.67	1146.13	1221.15	1178.02	1240.52	1226.36	1163.92	1158.27
1275	Fam69a	185.714	0.321946	0.0945563	3.40481	0.000662104	0.00777856	233.361	212.791	212.024	158.66	172.088	163.952	173.336	177.539	160.808	193.395	172.433	198.179
1276	Spag5	1772.54	-0.219046	0.0643831	-3.40223	0.000668381	0.00783386	1607.32	1522.48	1602.05	1938.2	1909.36	1900.01	1901.49	1934.13	1859.43	1607.65	1774.75	1713.67
1277	Gm43796	2178.89	0.380062	0.111704	3.40239	0.000667991	0.00783386	2316.7	2724.43	2872.56	1859.5	1740.35	1824.93	1976.89	1871.47	2026.99	2374.82	2104.98	2453.09
1278	Rmdn2	286.512	0.322153	0.0946776	3.40264	0.000667391	0.00783386	358.497	323.193	331.543	261.472	299.106	258.953	236.603	238.111	252.698	288.718	292.81	296.436
1279	Ulk3	201.646	-0.350699	0.103167	-3.39935	0.000675462	0.00791067	168.257	169.164	165.362	222.125	190.527	214.517	208.869	187.982	191.889	230.974	226.114	243.977
1280	Capzb	10583.2	0.0934696	0.0275159	3.39693	0.000681463	0.00796228	11081.3	11176.4	11060.4	10489.4	10588.6	10302.9	10801.4	10095.7	10451.2	10531.3	10243.5	10176.3
1281	Bola3	509.703	-0.409947	0.120678	-3.39704	0.000681182	0.00796228	395.699	412.226	417.499	607.987	657.624	609.841	482.74	496.065	495.937	512.359	592.127	436.328
1282	Traf3ip2	202.268	-0.393855	0.11594	-3.39707	0.000681107	0.00796228	154.729	177.177	158.813	225.933	227.403	182.339	195.003	198.426	268.914	230.974	196.833	210.67
1283	Slc7a6	1645.13	0.231065	0.0680418	3.39593	0.000683962	0.00798524	1846.6	1785.13	1914.76	1510.45	1650.21	1745.25	1647.56	1597.85	1660.78	1404.18	1461.61	1517.16
1284	Ubfd1	1258.45	0.182835	0.0538587	3.39472	0.000686987	0.00801431	1397.63	1427.21	1323.72	1218.51	1152.38	1230.41	1191.68	1180.11	1154.03	1303.35	1220.04	1302.32
1285	Rrp1b	1349.25	0.206685	0.0609101	3.39328	0.000690612	0.00805033	1551.51	1477.07	1471.89	1177.9	1355.2	1357.59	1237.62	1250.08	1239.17	1290.52	1383.53	1398.91
1286	Nab1	3166.08	-0.374026	0.110249	-3.39255	0.000692443	0.00805288	2670.97	2498.29	2600.77	3527.34	3462.26	3795.42	3627.92	3631.19	3687.77	2653.45	2821.55	3015.99
1287	Pdxk	3206.85	0.331636	0.0977515	3.39264	0.000692232	0.00805288	3797.19	3682.44	3887.65	3212.56	3056.62	3423.08	3243.98	3170.64	3228.32	2532.47	2570.22	2677.09
1288	Cryzl1	650.42	-0.256623	0.0756369	-3.39282	0.000691767	0.00805288	587.631	561.803	550.935	723.492	746.741	726.293	672.542	713.289	632.422	621.431	653.942	614.523
1289	Myo1g	1615.69	-0.157031	0.0462942	-3.39201	0.000693809	0.0080625	1462.74	1548.3	1452.24	1669.11	1686.06	1665.57	1726.42	1752.41	1578.35	1632.4	1625.1	1589.6
1290	Cntln	504.513	-0.421148	0.124201	-3.39085	0.000696762	0.00809054	421.065	389.078	394.577	619.411	586.945	580.728	563.341	599.455	559.45	409.704	478.256	452.149
1291	Troap	984.378	-0.225695	0.0665696	-3.39035	0.000698026	0.00809894	892.86	892.118	834.179	1111.89	1045.85	991.375	1034.81	1099.7	1025.66	905.565	1013.45	965.084
1292	Kif5c	110.326	-0.41791	0.123337	-3.38835	0.000703149	0.00815207	76.096	91.7048	95.7792	114.236	120.872	127.178	104.001	129.499	116.214	123.736	114.684	109.915
1293	Rad52	105.889	-0.472423	0.139492	-3.38674	0.00070728	0.00819362	75.2505	82.8014	86.7743	106.62	111.653	140.968	124.802	126.366	113.512	94.4061	97.6033	109.915
1294	Gatad2a	3142.63	0.138657	0.0409597	3.3852	0.000711274	0.00823351	3309.33	3400.2	3412.85	3018.36	3013.6	3024.69	3081.91	3229.12	3195.89	2865.18	3037.9	3122.58
1295	Rbms1	5160.36	0.132925	0.0392768	3.38432	0.000713539	0.00825336	5727.5	5497.83	5355.45	4849.93	4947.54	5038.08	5115.14	5161.16	4887.75	4874.29	5279.53	5190.14
1296	Trak2	3494	-0.362504	0.107164	-3.3827	0.000717782	0.00829604	2937.31	2844.63	2848	3938.59	3954.96	3971.63	4021.39	3968.52	4113.44	3041.16	3085.08	3203.35
1297	Hps1	459.929	-0.312966	0.0925815	-3.38044	0.000723691	0.00835788	382.171	407.775	381.479	458.211	435.343	421.373	488.807	485.621	444.587	548.105	532.751	532.919
1298	Ythdf1	2844.2	0.400319	0.118441	3.37991	0.000725086	0.00836753	3534.24	3392.19	3505.35	2397.68	2357	2306.06	2433.63	2474.06	2354.01	2940.34	3152.59	3283.28
1299	3110062M04Rik	319.539	-0.287847	0.0853129	-3.37401	0.000740804	0.00853854	297.62	252.856	270.965	324.937	312.423	321.775	344.938	312.26	393.236	341.878	332.665	328.911
1300	Pcdhgb1	123.567	-0.452549	0.134131	-3.37393	0.000741044	0.00853854	94.6973	89.0338	104.784	144.698	141.358	163.952	142.135	129.499	125.674	110.904	122.818	113.245
1301	9330102E08Rik	37.8719	-0.866004	0.256742	-3.37306	0.000743386	0.00855894	16.9102	24.9295	28.6519	39.3478	44.0465	50.5647	33.8005	29.2417	32.4319	47.6613	57.7486	49.1285
1302	Evi5l	223.757	-0.420276	0.124694	-3.37045	0.000750464	0.0086338	177.557	180.739	179.279	213.24	203.843	202.259	256.537	215.135	249.996	240.14	274.916	291.44
1303	Mea1	1039.41	0.351261	0.104248	3.36947	0.000753129	0.0086578	1198.09	1220.65	1305.71	915.154	886.051	919.358	893.545	862.63	899.985	1175.95	1087.46	1108.31
1304	Tmem261	514.113	0.238251	0.0707316	3.36838	0.000756106	0.0086588	544.509	576.048	616.425	528.022	517.29	501.05	474.94	513.818	510.802	482.113	453.855	450.483
1305	Mrpl19	1659.02	-0.255574	0.0758694	-3.3686	0.000755501	0.0086588	1427.22	1420.98	1493.17	1841.73	1951.36	1873.96	1690.02	1725.26	1737.81	1635.15	1551.89	1559.62
1306	H2-Ob	27.1189	-2.06371	0.612614	-3.3687	0.000755237	0.0086588	10.1461	8.01304	5.73038	44.4249	29.7058	44.4357	49.4007	54.306	52.7018	10.0822	7.32025	9.15955
1307	Slc25a46	1582.91	-0.246934	0.0733017	-3.36874	0.000755134	0.0086588	1395.94	1370.23	1394.94	1787.15	1646.11	1760.57	1736.82	1684.53	1748.62	1477.5	1478.69	1513.82
1308	Pcdhga6	164.953	-0.62743	0.186263	-3.36852	0.000755738	0.0086588	119.217	107.731	122.794	222.125	230.476	231.372	176.802	166.051	181.078	127.402	156.165	138.226
1309	2410002F23Rik	742.239	0.268001	0.0795721	3.36803	0.000757075	0.00866328	835.365	884.105	834.179	653.681	695.524	760.003	727.143	767.595	579.72	685.59	731.212	752.749
1310	Ormdl1	1173.2	-0.253246	0.0752176	-3.36684	0.000760347	0.00869407	1024.76	1098.68	951.243	1252.78	1368.51	1254.92	1218.55	1228.15	1282.41	1194.28	1122.44	1081.66
1311	Gm7292	812.876	0.311344	0.0924941	3.3661	0.00076239	0.00871078	979.948	918.828	958.61	709.53	653.527	692.583	806.878	694.49	805.392	850.572	821.495	862.663
1312	Aldh1l1	642.562	-0.545587	0.16217	-3.36429	0.000767408	0.00876144	458.267	464.756	510.004	635.911	624.845	660.406	949.879	820.856	858.093	582.018	563.659	582.048
1313	Snhg8	501.231	0.511953	0.152213	3.36341	0.000769867	0.00878281	571.566	708.709	660.631	401.094	391.296	361.614	431.606	413.561	421.614	641.595	500.217	511.27
1314	Dok2	2428.68	0.351948	0.10466	3.36279	0.000771602	0.00879591	2874.74	3019.13	2807.88	2018.16	2011.8	2116.06	2208.3	2196.26	2137.8	2920.17	2484	2349.84
1315	Mir704	518.658	-0.362083	0.107732	-3.36095	0.000776756	0.00884793	447.276	421.13	414.224	566.101	492.706	554.68	509.607	436.537	532.423	625.097	627.915	596.204
1316	Itgam_1	18656.2	0.387047	0.115172	3.3606	0.00077772	0.00885218	23243.1	22697.4	22026.8	15537.3	15209.3	14780.2	16620.3	16233.3	16215.9	20603.4	19997.3	20710.6
1317	Tcp1	14457	0.262737	0.0782291	3.35856	0.000783499	0.00891119	16698	16010	16853	13916.4	14321.2	14101.4	12178.6	12252.3	12529.5	14391	15290.4	14941.7
1318	Ddx41	1018.21	-0.188102	0.0560133	-3.35817	0.000784604	0.00891698	879.332	929.512	954.517	1066.2	1023.31	1081.78	1135.35	1050.61	1070.25	1046.72	980.1	1000.89
1319	Cep131	364.764	-0.244281	0.0727521	-3.35772	0.000785871	0.00892461	303.539	333.877	325.813	360.477	355.445	361.614	374.405	370.743	397.29	385.874	404.24	403.853
1320	Gpx1	9153.25	0.422518	0.125893	3.35616	0.000790323	0.00896837	10807.3	10860.3	12252.4	7957.14	7369.07	8274.23	7254.1	7045.16	7922.84	10258.2	9692.82	10145.5
1321	Vps37c	708.603	-0.214587	0.063968	-3.3546	0.00079481	0.00901246	596.086	625.017	672.91	746.339	760.057	735.487	725.41	743.575	799.986	719.503	668.583	710.282
1322	Srf	2243.29	0.425222	0.126766	3.35438	0.000795438	0.00901276	2725.08	2795.66	2807.07	1881.08	1788.49	1671.7	2006.36	1947.71	1878.35	2417.9	2532.81	2467.25
1323	Iqsec2	365.894	0.640656	0.191029	3.35371	0.000797358	0.00902768	471.795	539.545	492.812	271.627	253.011	229.84	282.537	262.131	331.075	415.204	414.814	426.336
1324	Dus3l	598.832	0.251546	0.075064	3.35109	0.000804946	0.00910671	656.117	710.489	680.278	538.176	530.606	528.631	591.075	589.011	516.207	638.845	596.194	610.359
1325	Trafd1	622.006	-0.298504	0.0891023	-3.35013	0.000807742	0.00913144	533.518	528.861	527.195	661.297	772.35	681.858	675.142	636.007	675.664	614.098	603.514	554.569
1326	Dynlrb1	1920.4	0.209699	0.0626009	3.34977	0.000808783	0.00913632	2150.14	2147.49	2116.15	1844.27	1824.34	1837.18	1795.76	1636.49	1875.64	1781.8	2018.76	2016.77
1327	Selenoh	694.014	0.292773	0.0874354	3.34845	0.000812637	0.00916761	753.351	804.865	853.826	761.57	706.792	710.971	598.875	580.657	605.395	681.007	623.035	647.83
1328	Snx16	328.227	0.304924	0.0910653	3.34841	0.000812777	0.00916761	406.691	377.503	360.195	323.667	340.08	358.55	303.337	291.373	329.724	288.718	274.103	284.779
1329	Sec24d	1527.71	0.18208	0.0543819	3.34817	0.000813458	0.00916839	1689.33	1691.64	1651.99	1367.02	1424.85	1423.47	1611.16	1471.48	1583.76	1444.51	1513.66	1459.7
1330	Cpeb1	231.452	-0.946047	0.282591	-3.34775	0.000814692	0.00917539	150.501	138.893	121.157	168.815	182.332	212.985	210.603	217.224	195.943	395.956	373.333	409.682
1331	Taf11	673.264	0.205236	0.0613517	3.34523	0.000822141	0.00925233	747.432	746.103	753.954	658.758	613.577	596.051	648.275	614.076	632.422	687.423	679.97	701.122
1332	Osbpl3	485.297	-0.273396	0.0818072	-3.34195	0.000831919	0.00935534	416.837	430.923	410.95	454.404	485.535	499.518	534.741	556.637	570.26	448.2	504.284	511.27
1333	Zfp398	397.919	-0.292884	0.0876481	-3.34159	0.000832993	0.00936039	353.424	365.929	304.529	404.902	410.759	363.147	455.006	439.67	431.074	375.791	428.641	442.157
1334	Cdpf1	126.381	-0.383115	0.114667	-3.34112	0.000834418	0.00936938	94.6973	99.7178	114.608	142.16	140.334	119.517	136.935	143.075	127.025	136.568	120.377	141.557
1335	Pebp1	1842.31	0.188554	0.0565279	3.3356	0.000851157	0.00955018	1942.14	2066.47	2080.95	1823.96	1872.49	1739.12	1778.42	1680.35	1625.65	1913.79	1730.02	1854.39
1336	Arl8b	5403.05	-0.243846	0.0731295	-3.33444	0.000854724	0.00958301	4861.69	4684.96	4691.54	5936.44	5949.34	5980.43	5852.68	5657.22	5971.52	4820.21	5135.56	5295.05
1337	Rab11b	2019.98	0.154273	0.0463046	3.33171	0.000863136	0.00967009	2247.37	2135.03	2179.18	1896.31	1896.05	1909.2	2107.76	1932.04	2035.1	1883.54	2013.07	2005.11
1338	Ndufb10	1621.91	0.179844	0.0539851	3.33136	0.000864233	0.00967515	1743.44	1810.95	1783.78	1501.56	1547.77	1570.57	1503.69	1455.82	1560.78	1624.15	1694.23	1666.21
1339	Dynlt1-ps1	1503.22	0.349382	0.104919	3.33002	0.000868406	0.0097146	1658.05	1917.79	1804.25	1373.37	1421.78	1343.8	1288.75	1221.89	1236.47	1702.06	1634.86	1435.55
1340	Scmh1	613.266	-0.278901	0.083817	-3.3275	0.000876279	0.00979536	541.973	518.176	524.739	623.218	663.77	615.97	673.409	698.668	722.961	537.107	623.848	615.355
1341	Etfbkmt	90.3693	0.4839	0.145585	3.32382	0.000887933	0.00991655	109.071	122.867	110.514	97.7349	96.2876	96.5326	83.2011	83.5477	81.0797	67.8258	68.3223	67.4476
1342	Tymp	336.048	0.306376	0.0921803	3.32366	0.000888444	0.00991655	370.334	406.884	397.033	345.245	320.617	337.098	358.805	309.127	331.075	303.383	277.356	275.619
1343	Gm15832	815.253	-0.262963	0.079146	-3.32251	0.000892119	0.00995014	721.221	704.257	699.106	778.071	794.885	899.439	891.812	944.089	955.389	785.496	819.054	790.22
1344	Slc39a13	241.882	0.322124	0.0969974	3.32095	0.000897112	0.00998062	290.856	296.482	266.053	225.933	223.305	222.178	266.937	250.643	237.834	211.726	204.967	205.674
1345	Depdc1a	1090.68	-0.256442	0.0772109	-3.32131	0.000895944	0.00998062	946.973	963.345	941.419	1153.78	1274.27	1239.6	1099.81	1179.07	1172.95	1093.46	1012.63	1010.88
1346	Zfp664	1202.34	0.247507	0.0745382	3.32053	0.000898457	0.00998062	1401.86	1388.04	1304.89	1082.7	1048.92	1097.1	1163.08	1099.7	1106.74	1347.35	1174.49	1213.22
1347	Ccdc77	334.247	-0.347287	0.104598	-3.3202	0.000899515	0.00998062	268.027	271.553	293.068	379.516	351.347	324.84	408.205	402.073	349.994	296.967	348.118	317.254
1348	Dnase2a	3822.99	0.193964	0.0584174	3.32032	0.000899146	0.00998062	3990.81	4238.9	4427.13	3866.24	3757.27	3991.55	3765.72	3707.43	3778.31	3509.52	3437.26	3405.69
1349	Heatr3	2249.01	0.162692	0.0489933	3.32071	0.000897894	0.00998062	2472.28	2411.03	2444.42	2278.36	2353.92	2276.94	2149.36	2075.12	2209.42	2142.01	2058.62	2116.69
1350	Gm960	11.4202	-1.49599	0.450543	-3.32041	0.000898854	0.00998062	5.07307	6.23236	3.2745	17.77	8.19469	13.7904	8.66678	16.7095	10.8106	11.9153	15.4539	19.1518
1351	Gm24357	97.6215	0.590007	0.177775	3.31883	0.000903946	0.0100197	157.265	124.647	110.514	77.4263	59.4115	90.4036	77.1344	98.1686	78.377	83.4073	110.617	104.086
1352	Mospd2	1105.34	0.700092	0.210954	3.3187	0.000904371	0.0100197	1614.93	1528.71	1518.55	738.723	779.52	801.374	780.877	766.55	783.77	1408.76	1256.64	1285.67
1353	Tldc1	158.818	-0.391405	0.117959	-3.31815	0.000906154	0.010032	120.908	119.305	144.897	149.776	157.748	190.001	192.403	181.716	175.673	153.066	151.285	169.035
1354	Hmces	337.603	-0.336695	0.101509	-3.31689	0.000910245	0.0100624	289.165	267.992	286.519	409.979	332.909	363.147	373.538	359.255	390.534	327.213	287.93	363.051
1355	Chd4	14735.8	-0.217248	0.0654953	-3.31699	0.000909913	0.0100624	13402.2	12972.2	13026	15746.7	16048.3	16070.4	15634.9	15976.4	15984.9	13223.3	14128.1	14616.1
1356	Ccdc173	53.4703	-0.674753	0.203484	-3.316	0.000913158	0.010074	38.8935	35.6135	36.0195	50.7714	67.6062	72.0164	65.8676	50.1286	54.0531	76.0748	48.8017	45.7978
1357	Itga6	1822	-0.563984	0.170082	-3.31595	0.000913309	0.010074	1391.71	1393.38	1239.4	1901.39	1915.51	1731.46	1654.49	1608.29	1479.7	2512.3	2440.9	2595.48
1358	Fbxl8	134.832	-0.396086	0.119443	-3.3161	0.000912819	0.010074	111.608	92.5951	121.975	139.621	133.164	133.307	133.468	154.563	164.862	150.317	130.951	151.549
1359	Gm13212	21.9016	-2.11177	0.636912	-3.31564	0.000914331	0.0100778	3.38205	8.01304	7.36763	17.77	16.3894	18.3872	53.7341	39.6852	63.5124	15.5816	6.50689	12.4903
1360	Gm7336	285.25	-0.562228	0.169626	-3.31453	0.000917985	0.0101107	215.605	227.926	188.284	316.052	249.938	275.808	268.67	258.998	279.725	313.465	420.508	408.016
1361	Fut7	67.3793	-0.541987	0.163665	-3.31157	0.000927751	0.0102107	41.4301	57.8719	50.7548	76.157	77.8496	73.5487	75.401	59.5277	89.1877	75.1583	65.8822	65.7822
1362	Cdsn	36.1311	0.65135	0.196817	3.30942	0.000934909	0.0102819	52.4217	45.4072	49.9361	40.6171	28.6814	35.2421	31.2004	22.9756	35.1345	37.5791	24.4008	29.9767
1363	Wdfy4	6399.91	-0.144518	0.0436725	-3.30914	0.000935844	0.0102847	5894.06	5951.02	5946.49	6522.85	6911.2	6715.91	6734.09	6626.38	6521.51	5994.33	6330.39	6650.67
1364	4931406C07Rik	769.427	-0.277738	0.0839896	-3.30681	0.000943633	0.0103627	655.271	677.547	654.9	838.997	791.812	861.132	824.211	881.428	889.174	708.504	717.384	732.764
1365	Fam210b	593.454	-0.255667	0.0773532	-3.30519	0.000949115	0.0104152	486.169	566.255	505.092	634.642	644.307	568.47	586.741	594.233	564.855	690.173	637.675	642.834
1366	Aif1	1890.83	0.460283	0.139296	3.30434	0.000951986	0.0104391	2246.52	2431.51	2459.15	1627.22	1563.14	1575.17	1557.42	1473.57	1421.6	2181.42	1969.96	2183.3
1367	Pilra	1796.51	0.941825	0.285113	3.30334	0.000955402	0.0104689	2727.62	2896.27	2793.97	1106.82	1049.94	1009.76	1072.08	1056.88	1085.12	2293.24	2213.97	2252.42
1368	Snord12	56.8644	0.549974	0.166597	3.30123	0.00096261	0.0105387	72.714	79.24	73.6763	50.7714	37.9004	41.3711	56.3341	61.6164	40.5398	58.6601	50.4284	59.1208
1369	Gm10053	371.417	-0.38525	0.116705	-3.30107	0.000963183	0.0105387	275.637	309.837	318.445	436.634	480.414	445.889	343.205	384.319	395.939	367.542	363.572	335.573
1370	Brip1os	1452.82	0.178263	0.0540178	3.30007	0.000966602	0.0105684	1674.96	1566.99	1534.92	1386.06	1463.78	1303.96	1484.62	1489.24	1433.76	1335.43	1374.58	1385.59
1371	Selenoi	1089.15	0.161661	0.0489972	3.29939	0.00096894	0.0105863	1253.89	1191.27	1105.14	1064.93	1057.11	1038.88	1065.15	1074.63	1077.01	1009.14	1078.52	1054.18
1372	Rsad2	41.0729	-0.831119	0.251988	-3.29825	0.000972912	0.0106219	20.2923	32.9425	23.7401	52.0406	58.3872	58.226	36.4005	43.8626	58.1071	33.9129	34.1612	40.8016
1373	Trerf1	1057.2	0.32495	0.0985527	3.29722	0.000976455	0.0106528	1300.4	1237.57	1203.38	866.921	939.316	908.633	984.547	909.626	943.227	1082.46	1103.73	1206.56
1374	Ppil3	614.985	-0.255957	0.0776918	-3.29452	0.000985898	0.0107402	547.891	547.558	514.097	607.987	707.816	698.712	637.875	570.213	633.773	694.756	627.101	592.04
1375	Fam60a	1419.68	-0.196871	0.0597566	-3.29455	0.000985786	0.0107402	1370.57	1288.32	1178.82	1592.95	1499.63	1472.51	1453.42	1377.49	1437.81	1392.26	1522.61	1449.71
1376	Cdk5rap1	246.031	0.333286	0.101177	3.29409	0.000987414	0.0107489	271.409	293.811	310.259	214.509	220.232	228.307	217.536	213.047	212.159	252.972	236.688	281.448
1377	Rdh13	766.531	0.214707	0.0651843	3.29385	0.000988259	0.0107503	825.219	827.124	907.037	747.608	756.984	822.826	712.41	750.885	764.852	675.508	707.624	700.289
1378	1110008F13Rik	4443.86	0.13222	0.0401481	3.29331	0.000990147	0.010763	4709.5	4654.68	4902.75	4373.95	4598.25	4359.29	4414.86	4190.96	4283.71	4443.5	4289.67	4105.15
1379	Alg9	524.026	0.199349	0.0605542	3.29209	0.000994472	0.0107997	595.24	567.145	577.131	462.019	480.414	542.422	511.34	497.109	518.91	531.607	493.71	511.27
1380	Adgre1	2655.12	2.46724	0.749478	3.29195	0.000994964	0.0107997	6643.18	6845.81	7165.43	2638.84	2411.29	2322.91	1124.08	996.306	968.902	233.724	225.301	285.612
1381	Ndufv2	2735.8	0.385386	0.117208	3.28806	0.00100882	0.0109421	3180.81	3418.9	3362.09	2392.6	2575.18	2299.93	2250.76	2249.52	2174.29	3187.81	2959.82	2777.84
1382	Gm10130	58.3798	0.481717	0.146541	3.28726	0.00101169	0.0109574	73.5595	74.7884	74.4949	49.5021	56.3385	55.1615	43.3339	53.2617	48.6478	59.5767	56.9353	54.9573
1383	Zc3h7b	923.956	-1.75632	0.534257	-3.28741	0.00101113	0.0109574	336.514	366.819	292.249	1460.95	1441.24	1316.21	1597.29	1632.31	1536.46	364.793	390.413	352.226
1384	Sec22c	290.456	-0.313367	0.0953362	-3.28697	0.00101271	0.0109606	243.507	251.966	241.494	289.397	312.423	323.308	306.804	344.634	290.536	274.053	266.782	340.569
1385	B3galnt2	521.947	0.238551	0.07259	3.28628	0.0010152	0.0109795	600.313	597.416	568.126	519.137	529.582	508.712	509.607	540.971	487.829	498.611	472.563	430.499
1386	2300009A05Rik	109.277	0.41598	0.126639	3.28477	0.00102064	0.0110239	134.436	134.441	135.892	104.081	77.8496	93.4681	100.535	107.568	94.593	123.736	109.804	94.9263
1387	Fam49b	6662.22	0.0986149	0.0300222	3.28474	0.00102077	0.0110239	7215.6	7040.79	6773.31	6573.62	6815.93	6492.2	6539.09	6424.82	6540.43	6522.27	6572.77	6435.84
1388	Gyg	1438.87	-0.263704	0.0803	-3.28399	0.0010235	0.0110374	1260.66	1238.46	1250.04	1611.99	1665.57	1546.05	1524.49	1547.72	1581.05	1274.02	1395.73	1370.6
1389	Eif4b	18101.1	0.149438	0.0455023	3.28419	0.00102277	0.0110374	19599.8	19388.9	19646.2	17494.5	18338.7	17086.3	16769.4	16632.3	17101.1	18614.5	18655.2	17886.1
1390	Uqcc1	700.191	0.185685	0.0565991	3.28071	0.00103544	0.0111582	728.831	784.387	794.067	642.258	707.816	730.89	672.542	689.269	664.853	684.673	649.875	652.826
1391	Clint1	4138.12	-0.100534	0.0306647	-3.27849	0.00104363	0.0112383	4017.03	3922.83	3840.17	4163.25	4187.49	4089.61	4197.32	4372.68	4258.03	4131.87	4257.13	4220.06
1392	Endov	135.82	-0.447747	0.136584	-3.27817	0.00104481	0.0112429	109.071	103.279	108.059	132.006	124.969	145.565	173.336	115.922	162.159	162.232	134.205	159.043
1393	Rgl3	174.303	0.300513	0.0916794	3.27787	0.00104595	0.0112472	202.077	202.997	202.2	152.314	167.991	183.872	172.469	167.095	171.619	143.901	160.232	164.872
1394	Pomk	353.37	-0.615307	0.187914	-3.2744	0.00105887	0.0113779	247.735	270.663	239.039	338.899	340.08	347.824	522.607	443.847	545.937	330.88	312.331	300.6
1395	Pax3	691.51	-0.211407	0.0646108	-3.27201	0.00106784	0.0114661	651.044	607.21	595.959	767.917	701.67	703.309	665.609	729.998	721.609	670.925	706.811	776.064
1396	Gm8292	30.6766	0.766712	0.234371	3.27136	0.00107033	0.0114846	51.5762	48.9686	33.5636	29.1935	18.4381	18.3872	25.1337	28.1974	24.3239	38.4957	26.0276	25.8133
1397	Bend6	157.553	-1.18871	0.363427	-3.27083	0.00107231	0.0114976	91.3152	64.9946	85.137	157.391	185.405	199.194	84.0678	91.9025	98.647	268.553	302.57	261.464
1398	Tigar	990.219	-0.324586	0.0993161	-3.26821	0.00108229	0.0115963	884.405	805.755	804.709	1116.97	1157.5	1120.09	1057.35	1069.41	1158.09	879.902	916.658	911.792
1399	Zfpm1	788.164	-0.347008	0.106235	-3.26641	0.00108922	0.0116622	622.297	678.437	666.361	825.035	798.982	692.583	763.544	788.482	763.5	905.565	993.927	959.255
1400	Camkk1	5.54227	-2.63662	0.807453	-3.26536	0.00109327	0.0116972	0.845512	0.890338	1.63725	7.6157	11.2677	4.59679	9.53346	4.17739	8.10797	5.49939	6.50689	5.82881
1401	Fermt3	5958.46	0.131853	0.0403848	3.26491	0.00109497	0.0117071	6148.56	6495.01	6490.06	5555.66	5530.39	5735.26	5857.01	5740.77	5866.12	6095.15	5987.15	6000.34
1402	Plekha2	3271.35	-0.180785	0.0553926	-3.26371	0.00109964	0.0117486	2940.69	2979.96	2994.53	3537.49	3563.67	3694.29	3282.98	3232.25	3358.05	3171.31	3146.08	3354.89
1403	Sh3bp2	1204.97	0.155182	0.0475771	3.26169	0.00110749	0.011824	1280.95	1382.69	1253.32	1184.24	1095.02	1169.12	1171.75	1176.98	1155.39	1190.62	1202.96	1196.57
1404	Pdik1l	1180.74	-0.227576	0.0698029	-3.26026	0.00111311	0.0118755	1058.58	1069.3	1011	1283.25	1272.23	1193.63	1344.22	1300.21	1241.87	1135.62	1089.09	1169.92
1405	Itgam_2	14420.6	0.393177	0.120652	3.25877	0.00111896	0.0119295	17701.6	17701.7	17289.4	11938.9	11644.7	11245.3	12788.7	12442.3	12543	16104	15562.8	16085
1406	Gm7967	223.404	0.552312	0.169596	3.25663	0.00112744	0.0120113	322.985	291.14	268.509	181.508	135.212	148.63	191.536	221.401	198.645	243.806	230.995	246.475
1407	Snrpb2	3242.83	0.27107	0.0833066	3.25389	0.00113838	0.0121193	3659.37	3835.57	3666.62	3230.33	3627.17	3174.85	2848.77	2819.74	2899.95	3325.29	3086.7	2739.54
1408	Aup1	3110.73	-0.155111	0.0477178	-3.25059	0.00115168	0.0122521	2781.73	2947.91	2875.83	3043.74	3065.84	3058.4	3227.51	3077.69	3226.97	3367.46	3400.66	3254.97
1409	Zfp414	494.862	0.459029	0.141369	3.24703	0.00116614	0.0123884	593.549	600.978	674.547	415.056	414.856	383.066	391.739	397.896	405.398	533.44	545.765	582.048
1410	Fam89b	1122.14	0.215218	0.0662798	3.24711	0.00116582	0.0123884	1222.61	1217.09	1313.89	1109.35	1001.8	1058.79	1139.68	1046.44	1229.71	1055.88	1001.25	1069.17
1411	Lrp4	66.8579	0.602056	0.185476	3.246	0.00117037	0.0124245	88.7787	95.2661	85.137	53.3099	76.8252	65.8874	78.001	61.6164	52.7018	54.9939	41.4814	48.2958
1412	Antxr2	1228.21	0.195862	0.0603671	3.24451	0.00117652	0.0124725	1362.96	1380.91	1326.17	1194.4	1155.45	1138.47	1187.35	1183.24	1351.33	1109.96	1115.93	1232.38
1413	Ftx	123.313	0.41919	0.1292	3.2445	0.00117656	0.0124725	153.883	152.248	151.446	95.1963	107.555	101.129	107.468	150.386	113.512	102.655	127.698	116.576
1414	Mcu	431.133	0.252042	0.0777631	3.24116	0.00119046	0.0126081	470.95	487.905	513.278	368.092	370.81	395.324	401.272	409.384	436.479	449.116	420.508	450.483
1415	Cdk5rap3	681.626	-0.273382	0.0843506	-3.24102	0.00119103	0.0126081	548.737	636.591	586.136	685.413	692.451	692.583	712.41	640.184	643.232	790.078	753.986	797.714
1416	Pcyt1b	15.694	-3.34353	1.03214	-3.23942	0.00119774	0.0126702	2.53653	1.78068	1.63725	13.9621	24.5841	38.3066	32.9338	40.7295	28.3779	1.83313	0.813361	0.832687
1417	2410004B18Rik	612.498	0.230708	0.0713237	3.23467	0.00121785	0.0128738	689.092	692.683	681.915	574.986	635.088	611.373	623.142	544.104	631.07	594.85	525.431	546.242
1418	Ndnf	155.997	-0.731872	0.226457	-3.23184	0.00122996	0.0129926	102.307	120.196	91.686	152.314	134.188	111.855	150.802	140.987	171.619	233.724	239.128	223.16
1419	Noa1	633.651	0.231186	0.0715397	3.23157	0.00123112	0.0129958	733.904	675.766	725.302	666.374	635.088	654.277	638.742	594.233	570.26	582.935	583.18	543.744
1420	Zfp583	12.1826	-1.51963	0.470396	-3.23053	0.00123561	0.0130339	3.38205	5.34203	6.549	12.6928	11.2677	6.12906	18.2002	20.8869	22.9726	8.24908	12.2004	18.3191
1421	Fanci	683.806	-0.253005	0.0783417	-3.22951	0.00124004	0.0130623	630.752	594.745	565.67	785.687	744.692	707.906	750.543	722.688	752.69	657.177	667.769	625.348
1422	Cd300a	847.806	0.413615	0.128068	3.22964	0.00123945	0.0130623	989.249	1046.15	1090.41	823.765	786.69	819.761	903.079	925.291	859.445	642.512	596.194	691.13
1423	Mitd1	387.471	-0.361722	0.112015	-3.22922	0.00124127	0.0130661	331.441	316.96	306.985	444.249	481.438	467.341	405.605	433.404	402.696	350.128	352.185	357.223
1424	Atp6v1g2	24.4326	0.761581	0.235866	3.22887	0.00124279	0.0130729	39.739	36.5038	30.2891	10.1543	21.5111	24.5162	23.4003	21.9313	18.9186	19.2478	20.334	26.646
1425	Mettl21a	250.179	-0.270996	0.0839446	-3.22827	0.0012454	0.0130911	206.305	208.339	234.127	280.512	259.157	254.356	253.07	277.796	259.455	258.471	239.941	270.623
1426	Map1lc3b	1682.34	-0.191928	0.0594573	-3.228	0.0012466	0.0130945	1528.68	1484.19	1548.84	1686.88	1612.31	1748.31	1737.69	1642.76	1724.29	1893.62	1683.66	1896.86
1427	Kbtbd2	1628.21	-0.329857	0.102243	-3.22621	0.0012544	0.0131672	1429.76	1361.33	1302.43	1775.73	1828.44	1785.09	1839.96	1920.55	1864.83	1369.35	1503.09	1557.96
1428	Tacc1	7743.37	0.138293	0.042901	3.22355	0.00126613	0.013281	8609	8172.41	8153.51	7729.94	7555.5	7595.43	7683.1	7638.35	7930.94	6946.64	7301.54	7604.09
1429	4933434E20Rik	1652.9	0.213109	0.0661541	3.22141	0.00127562	0.0133643	1910.86	1787.8	1831.26	1611.99	1654.3	1584.36	1514.09	1509.08	1443.22	1815.71	1629.98	1542.14
1430	St6gal1	152.881	2.12311	0.659072	3.22136	0.00127585	0.0133643	370.334	348.122	366.744	203.085	150.577	133.307	65.0009	56.3947	64.8638	30.2466	30.9077	14.9884
1431	Nsd1	1223.36	-0.437861	0.135962	-3.22046	0.00127987	0.013397	985.021	970.468	943.056	1218.51	1234.33	1175.25	1552.22	1564.43	1652.67	1046.72	1181	1156.6
1432	Fem1a	1560.33	0.193342	0.0600554	3.2194	0.00128458	0.0134369	1675.8	1715.68	1779.69	1425.41	1411.54	1383.63	1498.49	1576.96	1549.97	1533.41	1506.34	1667.04
1433	Spi1	5656.97	0.269614	0.0837592	3.21892	0.00128676	0.0134504	6285.53	6425.57	6743.02	5756.2	5393.13	5649.46	5907.28	5555.92	5862.06	4749.64	4663.81	4892.03
1434	Tmem87b	1588	-0.334047	0.103785	-3.21865	0.00128796	0.0134535	1383.26	1318.59	1281.97	1747.8	1741.37	1716.14	1906.69	1929.95	1709.43	1440.84	1483.57	1396.42
1435	Lrrfip1	6742.77	-0.102086	0.0317345	-3.21689	0.00129589	0.0135269	6276.23	6578.7	6317.33	6681.51	6942.95	7043.82	6701.16	6706.79	7017.45	6700.08	6985.14	6962.09
1436	Zswim5	52.1081	0.537905	0.167295	3.21532	0.001303	0.0135728	76.096	74.7884	53.2106	52.0406	43.0221	44.4357	50.2673	46.9956	48.6478	39.4123	43.9215	52.4593
1437	Ccdc155	6.15391	-2.81446	0.875288	-3.21547	0.0013023	0.0135728	1.69102	0.890338	0.818625	7.6157	6.14602	6.12906	12.1335	12.5322	0	10.9988	4.0668	10.8249
1438	Taf5l	1132.64	0.154675	0.0481047	3.21538	0.00130274	0.0135728	1225.99	1203.74	1244.31	1075.08	1154.43	1155.33	1113.68	1133.12	1112.14	1056.8	1034.6	1082.49
1439	Gm8210	504.076	0.293477	0.0912839	3.21499	0.00130448	0.0135777	557.192	560.913	637.709	474.712	500.9	497.986	467.14	480.399	385.129	508.693	536.818	441.324
1440	Tango2	255.377	0.245608	0.0763987	3.21481	0.00130529	0.0135777	289.165	294.702	285.7	247.51	250.962	249.759	243.537	236.022	218.915	234.64	252.142	261.464
1441	P2ry1	214.3	0.534898	0.166576	3.21113	0.00132214	0.0137435	271.409	279.566	283.244	213.24	211.013	255.888	216.67	192.16	210.807	142.984	146.405	148.218
1442	Strn	2321.47	0.23458	0.0730606	3.21077	0.00132381	0.0137513	2856.98	2525	2469.79	2048.62	2052.77	2105.33	2223.9	2152.4	2241.85	2314.32	2363.63	2503.06
1443	Arhgap12	1007.92	0.167361	0.0521342	3.21019	0.00132647	0.0137694	1146.51	1086.21	1064.21	918.962	989.509	930.084	1039.15	982.73	1028.36	944.061	975.22	990.064
1444	Ppp1cc	5232.27	0.107875	0.0336449	3.20629	0.00134458	0.0139477	5499.21	5617.14	5476.6	5223.1	5059.2	5103.97	5272.87	4988.84	5179.64	5370.15	5042.02	4954.49
1445	Stx6	1210.67	-0.144945	0.0452264	-3.20488	0.00135117	0.0140063	1095.78	1165.45	1104.33	1240.09	1176.96	1230.41	1225.48	1238.59	1295.92	1219.95	1246.07	1289
1446	Csnk2b	2379.09	0.251784	0.07859	3.20377	0.0013564	0.0140509	2626.16	2760.94	2728.48	2148.9	2176.71	2214.12	2177.96	2020.81	2158.07	2470.14	2631.22	2435.61
1447	Tmem97	2009.83	0.242477	0.0757007	3.2031	0.00135957	0.0140739	2177.19	2224.95	2414.13	2071.47	2030.23	1988.88	1965.63	1992.61	2036.45	1653.48	1792.65	1770.29
1448	Eef1akmt1	272.58	0.313897	0.0980518	3.20134	0.00136791	0.0141505	313.685	327.644	316.808	236.087	290.911	286.533	222.736	226.623	240.536	281.385	276.543	251.471
1449	Dera	1700.53	-0.17687	0.0552837	-3.19932	0.00137754	0.0142403	1470.34	1601.72	1571.76	1799.84	1896.05	1861.7	1747.22	1684.53	1712.13	1715.81	1632.42	1712.84
1450	Tmem81	208.288	0.265	0.0828455	3.19873	0.00138035	0.0142595	227.443	235.049	252.137	210.701	202.819	188.468	207.136	192.16	201.348	187.896	191.953	202.343
1451	Nenf	250.693	-0.413143	0.12927	-3.19598	0.00139358	0.0143764	171.639	202.107	230.034	246.241	256.084	216.049	277.337	258.998	268.914	344.628	278.983	257.3
1452	Ripk1	2469.85	-0.17532	0.0548564	-3.19598	0.00139357	0.0143764	2211.01	2188.45	2350.27	2586.8	2614.11	2635.49	2631.24	2617.13	2670.22	2361.99	2376.64	2394.81
1453	Tnfsf10	45.5152	-0.873556	0.273484	-3.19417	0.00140231	0.014452	29.5929	29.3811	24.5588	62.1949	83.9956	55.1615	38.1338	41.7739	58.1071	47.6613	41.4814	34.1402
1454	Srpr	4089.57	0.113887	0.0356558	3.19406	0.00140285	0.014452	4356.92	4281.63	4369	3913.2	4162.9	4210.66	3982.39	3844.24	3902.64	3949.48	4074.94	4026.87
1455	Mfhas1	651.101	0.346127	0.108375	3.19378	0.00140421	0.0144561	775.334	753.226	799.797	547.061	515.241	537.825	571.141	579.612	636.476	666.342	710.877	720.274
1456	Imp3	799.251	0.205748	0.0644803	3.19087	0.00141845	0.0145927	868.34	876.982	919.316	731.108	753.911	767.664	767.01	724.776	766.203	888.151	753.986	773.566
1457	Gm42748	25.4387	0.9223	0.289218	3.18894	0.00142796	0.0146805	54.1127	38.2845	27.0146	19.0393	12.292	15.3226	20.8003	25.0643	16.2159	22.9141	31.7211	22.4825
1458	Ptpn1	2965.15	0.257119	0.0806447	3.18829	0.00143117	0.0147033	3409.95	3325.41	3397.3	2942.2	3004.38	2880.66	2990.04	3057.85	3048.6	2443.56	2525.49	2556.35
1459	Def6	1169.52	0.179987	0.0564719	3.18719	0.00143664	0.0147494	1258.12	1305.23	1286.88	1080.16	1086.82	1127.75	1100.68	1052.7	1131.06	1218.11	1218.41	1168.26
1460	Nudt8_1	110.34	-0.539521	0.169333	-3.18615	0.00144182	0.0147925	66.7954	74.7884	105.603	126.928	135.212	116.452	101.401	93.9912	102.701	140.234	132.578	127.401
1461	Arfrp1	660.145	0.420326	0.131948	3.18554	0.00144484	0.0148133	830.292	811.098	805.527	555.946	539.825	542.422	522.607	567.08	531.072	741.5	749.105	725.27
1462	BC034090	6.53628	-2.8789	0.903891	-3.185	0.00144752	0.0148307	1.69102	1.78068	0	15.2314	9.21903	6.12906	1.73336	3.13304	4.05398	9.16564	14.6405	11.6576
1463	Rbbp7	5861.07	0.577215	0.181245	3.18472	0.00144894	0.014835	7811.68	7514.45	8037.26	4338.41	4594.15	4570.74	4502.39	4294.35	4091.82	6460.86	7213.7	6902.97
1464	Mllt6	2317.69	0.214618	0.0674757	3.18068	0.00146932	0.0150334	2479.04	2676.35	2606.5	2093.05	2052.77	2169.69	2156.3	2196.26	2126.99	2444.48	2327.84	2483.07
1465	Traf3ip3	545.494	-0.280415	0.0881907	-3.17964	0.00147457	0.0150768	461.649	478.111	470.71	607.987	638.161	577.664	538.207	566.036	463.506	631.513	564.473	547.908
1466	Kcnq1	9.39183	-1.73612	0.54605	-3.17942	0.00147572	0.0150783	4.22756	4.45169	1.63725	11.4236	10.2434	13.7904	5.20007	7.31043	9.4593	21.081	11.3871	12.4903
1467	Sept11	2945.86	0.152269	0.0479196	3.17758	0.00148508	0.0151637	3234.08	3169.6	3153.34	2671.84	2786.19	2816.3	2853.97	2978.48	3028.33	2704.78	2954.94	2998.5
1468	Pex5	1427.6	-0.306193	0.096388	-3.17667	0.00148975	0.01517	1178.64	1183.26	1278.69	1438.1	1348.03	1369.84	1462.95	1481.93	1317.54	1808.38	1591.75	1672.03
1469	Cebpa	245.415	-1.68408	0.530107	-3.17687	0.00148876	0.01517	90.4697	85.4724	100.691	355.399	326.763	277.34	487.073	456.379	451.344	95.3227	116.311	102.42
1470	Mrpl54	323.995	0.283241	0.0891549	3.17695	0.00148832	0.01517	355.115	392.639	373.293	298.282	314.471	330.969	328.471	312.26	298.644	321.714	314.771	247.308
1471	G2e3	1036.52	-0.215127	0.0677198	-3.17672	0.00148949	0.01517	935.981	967.797	875.929	1021.77	1050.97	945.407	1127.55	1120.58	1079.71	1022.89	1128.95	1160.77
1472	Gm3788	249.807	-0.539383	0.169863	-3.17539	0.00149635	0.0152268	191.931	178.958	189.921	250.049	251.987	211.452	217.536	242.288	243.239	336.379	372.519	311.425
1473	Palm	62.2739	-1.19467	0.376265	-3.17507	0.00149799	0.0152332	28.7474	36.5038	30.2891	36.8092	45.0708	39.8389	63.2675	46.9956	81.0797	114.571	100.043	124.07
1474	Polr1a	5877.74	-0.23263	0.0733065	-3.17338	0.00150673	0.0153116	5340.25	4985.89	5258.03	6427.65	6389.81	6452.36	6357.09	6354.85	6279.62	5097.01	5741.52	5848.79
1475	Gm15163	204.172	-0.317184	0.0999721	-3.17273	0.00151015	0.015336	175.021	162.041	178.46	209.432	240.719	208.388	213.203	221.401	247.293	191.562	195.207	207.339
1476	Prkcb	508.615	-4.92401	1.55273	-3.17119	0.00151814	0.0154045	17.7557	23.1488	25.3774	1020.5	996.679	1067.99	981.947	979.597	987.821	0.916564	0.813361	0.832687
1477	Samd8	1336.5	0.183968	0.058015	3.17104	0.00151896	0.0154045	1513.47	1485.08	1407.22	1264.21	1195.4	1339.2	1326.88	1350.34	1270.25	1191.53	1304.63	1389.75
1478	Rad9b	28.9034	-1.07238	0.338416	-3.16881	0.00153065	0.0155126	17.7557	16.0261	13.9166	22.8471	22.5354	42.9034	21.667	34.4634	20.2699	50.411	37.4146	46.6305
1479	Sntb2	4996.79	0.422135	0.133234	3.16838	0.0015329	0.0155144	6466.47	6054.3	5994.79	4165.79	3902.72	4216.79	4011.85	4102.19	4232.36	5544.3	5451.96	5817.98
1480	Setd4	60.6832	-0.648236	0.204585	-3.16855	0.00153204	0.0155144	43.9666	46.2976	38.4754	52.0406	60.4358	62.8228	54.6007	59.5277	58.1071	88.9067	78.0827	84.934
1481	Cers5	2397.44	0.117828	0.0372078	3.16674	0.00154156	0.0155915	2567.82	2485.82	2581.94	2450.99	2311.93	2353.56	2375.57	2347.69	2432.39	2253.83	2327.84	2279.9
1482	Erp29	4265.86	0.162818	0.051422	3.16631	0.00154385	0.0156041	4474.45	4744.61	4689.09	4352.37	4448.69	4207.6	4212.06	4042.67	4045.88	4204.28	3975.71	3792.89
1483	Plxnc1	3742.4	0.189698	0.0599357	3.16502	0.00155071	0.0156524	4214.88	4120.48	4035	3759.62	3306.56	3731.06	3484.91	3304.31	3612.1	3589.27	3821.98	3928.62
1484	Epn2	142.638	0.563995	0.178187	3.1652	0.00154979	0.0156524	183.476	184.3	199.745	97.7349	87.0686	95.0004	131.735	140.987	131.079	142.067	159.419	159.043
1485	Gm14269	136.46	-0.437412	0.138281	-3.1632	0.00156044	0.0157399	94.6973	119.305	109.696	147.237	179.259	147.097	128.268	147.253	127.025	156.732	161.045	119.907
1486	Narfl	597.208	0.222307	0.0702972	3.16239	0.0015648	0.0157733	674.718	685.56	648.351	591.486	516.265	539.357	543.407	590.056	562.153	650.761	583.993	580.383
1487	2610203C22Rik	299.864	-0.354258	0.112097	-3.16029	0.00157613	0.0158614	280.71	236.83	227.578	294.474	335.982	341.695	278.204	298.683	266.212	361.126	354.625	322.25
1488	Rps13-ps2	55.2792	0.57337	0.181436	3.16018	0.00157671	0.0158614	75.2505	74.7884	70.4018	35.5399	47.1195	53.6292	42.4672	34.4634	56.7558	58.6601	61.8154	52.4593
1489	Ptges3l	159.607	0.319038	0.100954	3.16023	0.00157645	0.0158614	190.24	191.423	183.372	140.891	141.358	134.839	145.602	149.342	147.295	162.232	149.658	179.028
1490	Lancl1	619.797	-0.225074	0.0712264	-3.15998	0.00157782	0.0158619	547.046	535.093	568.945	613.064	601.285	622.099	608.408	614.076	681.069	728.669	644.995	672.811
1491	Hdhd5	236.938	-0.338957	0.107319	-3.15842	0.00158628	0.0159363	202.077	178.068	212.024	261.472	224.33	248.227	239.203	271.53	247.293	298.8	220.421	239.814
1492	Rab19	128.621	-0.907178	0.287421	-3.15628	0.00159798	0.0160393	65.9499	83.6917	83.4998	162.468	174.137	168.549	88.4012	77.2816	85.1337	187.896	172.433	194.016
1493	Rpl32	21782.3	-0.262599	0.0832024	-3.15615	0.00159868	0.0160393	18741.6	19028.3	19069.1	22213.7	22064.2	22162.7	21101	19894.8	21528	27154.1	23891.7	24538.4
1494	Rai14	821.241	-0.217175	0.0688946	-3.15227	0.00162005	0.0162428	734.75	720.283	740.856	779.34	790.788	905.568	777.41	823.989	879.715	901.899	910.151	890.142
1495	Tcte2	97.0841	0.691996	0.219541	3.15201	0.0016215	0.0162464	133.591	126.428	145.715	115.505	120.872	104.194	78.8677	79.3703	75.6744	59.5767	56.9353	68.2803
1496	Kdelr2	1185.09	0.151249	0.0479946	3.15138	0.00162498	0.0162705	1256.43	1286.54	1300.8	1155.05	1113.45	1129.28	1151.82	1260.53	1116.2	1120.96	1146.84	1183.25
1497	Sms	1640.86	0.825052	0.261969	3.14942	0.00163593	0.0163692	2316.7	2276.59	2719.47	1139.82	1044.82	1143.07	1051.28	948.267	948.632	1992.61	1974.84	2134.18
1498	Egr4	19.3272	1.12679	0.357861	3.14867	0.00164014	0.0164003	34.666	33.8328	30.2891	15.2314	5.12168	6.12906	18.2002	9.39912	17.5673	22.9141	23.5875	14.9884
1499	Gm7846	180.092	-0.41176	0.130865	-3.14646	0.0016526	0.0164918	138.664	147.796	147.353	200.547	225.354	185.404	155.135	202.603	145.943	218.142	197.647	196.514
1500	C87436	302.988	-0.431828	0.137238	-3.14655	0.00165209	0.0164918	232.516	249.295	237.401	328.745	286.814	352.421	383.938	393.719	355.399	258.471	277.356	279.783
1501	Ifit1	18.2601	-1.31111	0.416693	-3.14647	0.00165255	0.0164918	7.6096	8.90338	9.00488	31.7321	32.7788	36.7743	13.8669	15.6652	14.8646	18.3313	16.2672	13.323
1502	Pet117	628.649	0.211412	0.0672531	3.14353	0.00166926	0.016647	727.14	690.902	684.371	632.103	648.405	605.244	654.342	583.79	536.477	570.103	623.035	587.877
1503	Taf5	419.721	-0.219477	0.0698305	-3.14299	0.00167231	0.0166663	349.196	397.091	376.568	397.286	439.44	416.776	457.606	465.779	443.236	428.952	439.215	425.503
1504	Dusp4	6538.03	0.19111	0.0608101	3.14273	0.00167383	0.0166704	7202.91	7124.48	7302.14	6053.21	6111.19	6153.57	5905.55	6038.41	6275.57	6993.38	6290.53	7005.39
1505	Bax	2079.65	0.18152	0.0577656	3.14235	0.00167598	0.0166807	2164.51	2348.71	2337.18	1906.46	1898.1	1926.06	2174.5	2010.37	1990.51	2194.25	2032.59	1972.63
1506	Pcdhgb6	137.958	-0.429481	0.136763	-3.14032	0.00168765	0.0167857	106.534	105.06	114.608	162.468	152.626	188.468	156.002	137.854	149.997	123.736	139.898	118.242
1507	Ccdc71l	683.801	0.197567	0.0629294	3.13951	0.00169232	0.016821	740.668	711.38	812.076	665.105	652.502	706.374	672.542	631.83	706.745	645.261	647.435	613.69
1508	Mfsd6	2518.53	-0.619824	0.197497	-3.1384	0.00169873	0.0168577	1900.71	1669.38	1815.71	3196.06	2996.18	3059.93	3282.11	3137.22	3433.72	1892.71	1791.83	2046.74
1509	Dis3l2	608.443	-0.211856	0.0675067	-3.1383	0.0016993	0.0168577	521.681	564.474	546.023	625.757	708.841	646.615	645.675	621.386	578.368	625.097	630.355	587.044
1510	2210408I21Rik	58.6829	-0.64765	0.20637	-3.13829	0.00169939	0.0168577	42.2756	33.8328	47.4803	54.5792	66.5819	45.9679	77.1344	58.4834	89.1877	68.7423	69.1357	50.7939
1511	Trim24	509.98	-0.234373	0.0746981	-3.13761	0.00170334	0.0168857	483.633	449.62	420.773	515.329	508.071	508.712	531.274	543.06	504.045	495.861	583.993	575.386
1512	Trem1	655.174	-0.441063	0.140687	-3.13506	0.00171817	0.0170215	552.119	471.879	524.739	850.42	817.42	657.341	806.011	695.535	722.961	679.174	546.579	537.916
1513	Ccdc167	208.917	0.340472	0.108639	3.13398	0.00172455	0.0170734	256.19	220.804	269.328	167.545	194.624	188.468	178.536	201.559	174.321	223.642	217.981	214
1514	Capn2	4402.24	0.242129	0.0772701	3.13354	0.00172714	0.0170764	4960.62	4944.93	5028	4290.18	4193.63	4264.29	4553.53	4373.72	4806.67	3735	3758.54	3917.79
1515	Idua	290.591	-0.355979	0.1136	-3.13362	0.00172664	0.0170764	246.044	241.281	230.852	333.822	317.544	335.566	318.938	314.348	351.345	233.724	284.676	278.95
1516	AC112265.1	136.483	-0.339324	0.108329	-3.13233	0.00173422	0.0171352	110.762	121.086	108.877	153.583	142.383	144.033	139.535	148.297	149.997	156.732	130.951	131.564
1517	Hmgn5	2087.12	-0.202632	0.0647057	-3.13159	0.00173861	0.0171672	1899.86	1832.31	1889.39	2297.4	2171.59	2204.93	2254.23	2162.84	2299.96	1868.87	2148.9	2015.1
1518	Zfand3	1722.74	0.167294	0.0534488	3.12998	0.00174815	0.0172501	1890.56	1879.5	1864.01	1681.8	1612.31	1602.75	1616.36	1561.3	1666.19	1842.29	1743.85	1712
1519	Ndufa11	779.36	0.319416	0.102057	3.12977	0.00174945	0.0172515	834.52	974.029	941.419	686.683	650.453	684.922	650.875	702.845	724.312	877.152	818.241	806.873
1520	Tk1	2173.86	-0.214745	0.0686195	-3.1295	0.00175102	0.0172556	1782.34	2013.05	2022.82	2332.94	2334.46	2359.69	2395.5	2328.89	2239.15	2218.09	2032.59	2026.76
1521	Stk4	7420.59	0.15655	0.0500395	3.12854	0.00175677	0.0172896	8231.06	7814.49	8072.46	7542.08	7296.35	7131.16	7625.04	7358.46	7543.11	6668.92	6956.68	6807.21
1522	Stil	878.142	-0.236102	0.0754667	-3.12856	0.00175667	0.0172896	796.472	740.761	785.88	838.997	891.173	977.585	903.079	961.843	956.74	778.163	974.406	932.609
1523	Ruvbl1	1630.08	-0.232669	0.0743983	-3.12735	0.0017639	0.0173483	1492.33	1453.03	1374.47	1735.11	1882.73	1798.88	1714.29	1740.93	1740.51	1509.58	1617.77	1501.33
1524	D630045J12Rik	128.967	-0.886288	0.283547	-3.12572	0.00177368	0.017433	80.3236	81.9111	73.6763	163.738	159.796	159.355	193.269	190.071	185.132	67.8258	98.4167	94.0936
1525	Stom	8294.28	0.220742	0.0706472	3.12457	0.00178065	0.0174786	9286.25	8995.97	9557.45	8155.15	7800.32	8482.61	8218.71	7660.28	9090.38	7376.51	7075.43	7832.25
1526	Ppip5k1	740.335	-0.213828	0.0684302	-3.12476	0.00177951	0.0174786	655.271	665.082	659.812	771.725	791.812	767.664	740.143	846.965	837.823	717.67	722.265	707.784
1527	Cars	2092.3	0.127495	0.0408134	3.12385	0.00178499	0.0175097	2276.96	2241.87	2182.46	2002.93	1965.7	2119.12	1950.03	2010.37	2063.48	2101.68	2122.06	2070.89
1528	Blm	1509.22	-0.208058	0.0666127	-3.12339	0.0017878	0.0175258	1434.83	1300.78	1322.08	1639.91	1511.92	1490.89	1430.02	1525.79	1502.68	1544.41	1719.45	1687.86
1529	St3gal5	11850.9	-0.11178	0.0357981	-3.12252	0.0017931	0.0175663	11004.3	11328.7	11202.1	12173.7	12005.2	11446	12134.4	11723.8	11975.5	11989.6	12500.5	12727.6
1530	Smg6	780.99	-0.243797	0.0781053	-3.12138	0.00180005	0.0176228	692.474	722.954	642.621	807.265	850.199	778.39	786.944	928.424	864.85	734.168	744.225	819.364
1531	Gm7984	189.558	0.388881	0.124615	3.12067	0.00180443	0.0176542	219.833	236.83	235.764	163.738	170.04	148.63	143.002	182.761	190.537	215.393	204.967	163.207
1532	Rasd2	11.6788	-2.56175	0.820955	-3.12044	0.00180578	0.0176559	1.69102	1.78068	4.09313	11.4236	4.09734	1.53226	9.53346	7.31043	8.10797	31.1632	22.7741	36.6382
1533	Zc3hav1	4655.85	-0.214585	0.0687726	-3.12021	0.00180724	0.0176586	4052.54	4221.09	4190.54	5003.52	5341.91	5185.18	4698.26	4887.54	4891.81	4188.7	4679.27	4529.82
1534	Mrpl53	450.376	-0.305415	0.0979012	-3.11962	0.00181085	0.0176708	344.123	381.955	423.229	431.557	500.9	450.486	422.072	496.065	440.533	560.937	488.017	464.639
1535	Dcaf5	1393.42	-0.130829	0.0419366	-3.11969	0.00181041	0.0176708	1323.23	1277.63	1298.34	1439.37	1488.36	1425.01	1394.49	1413	1474.3	1356.52	1417.69	1413.07
1536	Gss	726.8	0.345508	0.110793	3.11849	0.00181783	0.0177274	812.537	877.873	907.037	640.988	628.942	655.809	608.408	620.342	610.8	846.905	709.251	802.71
1537	Hmmr	3678.62	-0.169599	0.0543897	-3.11822	0.00181948	0.017732	3386.27	3332.53	3367.01	3880.2	4000.03	4135.58	3761.38	3764.87	3797.23	3537.02	3704.05	3477.3
1538	Fzd5	189.269	-0.308156	0.0989095	-3.11553	0.00183612	0.0178791	165.72	155.809	160.451	190.393	203.843	179.275	221.87	218.268	213.51	184.229	183.006	194.849
1539	Pja2	1875.78	0.212616	0.068247	3.1154	0.00183697	0.0178791	2236.38	2059.35	1981.07	1804.92	1709.62	1728.39	1763.69	1741.97	1643.22	1915.62	1932.55	1992.62
1540	Dnm1	5.83332	-2.41304	0.774619	-3.11513	0.00183863	0.0178836	1.69102	1.78068	0.818625	6.34642	6.14602	3.06453	5.20007	8.35477	2.70266	9.16564	10.5737	14.1557
1541	Leprotl1	792.012	0.144921	0.0465445	3.1136	0.0018482	0.0179651	866.649	844.04	848.914	783.148	748.79	789.116	772.21	758.196	752.69	777.246	797.907	765.239
1542	Ptpru	9.64031	-2.04496	0.656831	-3.11337	0.00184965	0.0179661	1.69102	4.45169	2.45588	13.9621	18.4381	16.8549	14.7335	17.7539	8.10797	8.24908	7.32025	1.66537
1543	Ccnb1	3793.73	-0.231728	0.074434	-3.1132	0.0018507	0.0179661	3365.98	3346.78	3349.81	4192.44	4169.05	4216.79	4196.46	4054.15	3956.69	3372.04	3738.21	3566.4
1544	Lmtk2	667.514	0.20902	0.0671592	3.11231	0.00185632	0.0179994	773.643	693.573	759.684	685.413	618.699	671.132	639.609	673.603	582.422	604.016	621.408	686.967
1545	Map3k8	187.069	0.373806	0.120107	3.11227	0.00185654	0.0179994	233.361	237.72	207.931	192.931	150.577	150.162	170.736	148.297	168.916	216.309	182.193	185.689
1546	Rasgrf2	37.5019	0.626394	0.201305	3.11167	0.00186031	0.0180244	51.5762	54.3106	45.843	40.6171	34.8274	36.7743	38.1338	36.5521	32.4319	31.1632	21.1474	26.646
1547	Isy1	1818.93	-0.22721	0.0730279	-3.11128	0.00186279	0.0180366	1657.2	1621.3	1555.39	2085.43	2057.89	1975.09	1865.96	1814.03	1994.56	1708.48	1737.34	1754.47
1548	Gm23246	53.0012	0.502202	0.161503	3.10955	0.00187369	0.0181305	65.1044	66.7753	72.8577	41.8864	46.0951	42.9034	39.0005	59.5277	45.9452	51.3276	48.8017	55.79
1549	Ankmy2	599.597	-0.219506	0.0705957	-3.10934	0.00187506	0.0181321	527.599	519.067	550.935	690.49	624.845	637.422	641.342	631.83	647.286	577.435	583.18	563.729
1550	Gchfr	24.0057	0.796562	0.256295	3.10799	0.00188365	0.0182033	37.2025	33.8328	36.0195	13.9621	22.5354	9.19358	23.4003	24.02	18.9186	31.1632	20.334	17.4864
1551	Dhx16	1613.28	0.307879	0.099067	3.10778	0.00188497	0.0182043	1828	1869.71	1960.61	1430.48	1369.54	1466.38	1377.15	1443.29	1371.6	1692.89	1787.77	1761.97
1552	Setdb1	2297.54	0.11419	0.0367458	3.10756	0.00188636	0.0182061	2496.8	2417.27	2397.75	2221.25	2180.81	2200.33	2230.83	2274.59	2287.8	2376.65	2246.5	2239.93
1553	Ndufa13	1030.44	0.174884	0.0562847	3.10714	0.00188908	0.0182205	1058.58	1130.73	1193.56	1010.35	985.411	969.923	1020.08	952.444	971.605	1077.88	1034.6	960.088
1554	Map3k4	1520.4	0.234655	0.0755648	3.10535	0.00190056	0.0183195	1724	1695.2	1723.21	1439.37	1406.41	1516.94	1360.68	1330.5	1298.63	1505.92	1621.03	1622.91
1555	Serpinb8	473.368	-0.383299	0.123452	-3.10484	0.00190382	0.0183391	382.171	359.696	411.769	585.14	572.604	583.793	502.673	496.065	501.343	395.039	421.321	468.803
1556	Irf9	550.584	-0.438022	0.141115	-3.104	0.00190924	0.0183795	423.601	406.884	471.528	679.067	684.257	714.035	557.274	620.342	610.8	504.11	455.482	479.628
1557	BC030867	389.352	-0.234682	0.0756234	-3.1033	0.00191374	0.018411	326.367	351.683	354.465	415.056	362.615	396.856	379.605	412.517	395.939	413.37	444.908	418.841
1558	Gm28809	54.0428	-0.776079	0.250105	-3.10301	0.00191561	0.0184172	27.0564	46.2976	32.745	60.9256	49.1681	67.4196	50.2673	38.6408	49.9991	86.157	72.3891	67.4476
1559	Afmid	88.5547	-0.436143	0.140581	-3.10242	0.00191945	0.0184422	63.4134	72.1173	74.4949	105.351	90.1416	104.194	85.8012	82.5034	79.7284	109.071	98.4167	97.4243
1560	Taok3	3296.82	-0.290445	0.093675	-3.10056	0.00193155	0.0185207	2872.2	2848.19	2749.76	3702.5	3711.17	3712.68	3599.32	3637.46	3735.07	2838.6	3168.85	2986.01
1561	Cwf19l2	863.375	-0.210607	0.067921	-3.10077	0.00193019	0.0185207	788.017	771.032	755.591	904.999	984.387	963.794	921.279	903.36	859.445	810.243	819.868	878.484
1562	Nop16	750.073	0.257082	0.0829136	3.1006	0.00193128	0.0185207	823.528	803.975	932.414	767.917	767.228	776.858	745.343	714.333	720.258	647.094	682.41	619.519
1563	Pcdh19	196.087	1.15281	0.371827	3.1004	0.00193256	0.0185207	366.952	311.618	321.72	142.16	162.869	173.146	219.27	208.869	243.239	55.9104	74.0158	73.2764
1564	Rffl	503.886	0.33112	0.106826	3.09962	0.00193767	0.0185578	590.167	594.745	604.964	422.672	488.608	452.018	430.739	414.606	416.209	537.107	533.565	561.231
1565	C030034I22Rik	37.0635	0.633316	0.204448	3.09769	0.00195034	0.0186672	54.1127	48.9686	49.9361	31.7321	26.6327	22.984	28.6004	34.4634	29.7292	41.2454	45.5482	30.8094
1566	Phtf2	420.452	0.272575	0.0880377	3.09612	0.00196073	0.0187458	513.226	444.278	487.901	383.324	357.493	407.582	383.072	402.073	490.532	380.374	405.867	389.697
1567	Gm12174	323.235	-0.395925	0.127885	-3.09593	0.00196194	0.0187458	263.8	244.843	276.695	336.36	339.055	329.437	308.537	298.683	286.482	448.2	358.692	388.032
1568	Akap8	2791.57	0.163002	0.0526513	3.09588	0.00196231	0.0187458	3097.11	3005.78	3002.72	2657.88	2745.22	2776.46	2845.3	2911.64	2512.12	2503.14	2772.75	2668.76
1569	Bag6	5323.13	0.298701	0.0964942	3.09553	0.0019646	0.0187557	6011.59	6185.17	6382	4669.7	4464.06	4616.71	4705.2	4750.73	4790.46	5592.87	5756.16	5952.88
1570	E130311K13Rik	163.889	-0.460491	0.148798	-3.09474	0.00196986	0.018794	123.445	142.454	116.245	185.315	216.135	212.985	172.469	187.982	171.619	138.401	146.405	153.214
1571	ENSMUSG00000116275.1	3821.81	0.152464	0.049269	3.09452	0.00197129	0.0187956	4346.77	4042.13	4014.54	3451.18	3607.71	3622.27	3757.92	3842.15	3662.1	3719.42	3787.82	4007.72
1572	Lrmp	3470.61	-0.252504	0.0816056	-3.0942	0.00197341	0.0188003	3028.62	3074.34	3006.81	3301.41	3436.65	3325.01	3432.05	3488.12	3408.05	4007.22	4051.35	4087.66
1573	Ate1	1388.47	0.19005	0.0614277	3.09388	0.00197555	0.0188003	1555.74	1547.41	1484.17	1412.71	1348.03	1323.88	1413.55	1439.11	1399.98	1236.45	1260.71	1239.87
1574	Hgsnat	1402.73	0.215722	0.069721	3.09407	0.00197429	0.0188003	1565.04	1716.57	1420.31	1287.05	1278.37	1256.46	1372.82	1345.12	1341.87	1512.33	1374.58	1362.28
1575	Gm16845	79.2804	-0.455815	0.147367	-3.09306	0.00198106	0.0188408	53.2672	64.1043	68.7645	71.0799	95.2633	85.8068	81.4678	80.4147	90.539	88.9067	95.9766	75.7745
1576	6530402F18Rik	15.3739	-2.95785	0.956513	-3.09232	0.00198597	0.0188635	0.845512	1.78068	4.91175	21.5778	16.3894	15.3226	45.934	43.8626	27.0266	2.74969	3.25344	0.832687
1577	2010008C14Rik	184.364	-0.537804	0.173911	-3.09241	0.0019854	0.0188635	143.737	137.112	130.98	211.97	237.646	203.791	193.269	225.579	258.104	131.069	166.739	172.366
1578	5033430I15Rik	6.88995	1.37117	0.443591	3.09107	0.0019944	0.0189196	9.30063	13.3551	16.3725	7.6157	3.07301	0	4.33339	4.17739	4.05398	6.41595	7.32025	6.66149
1579	Mrpl28	1278.21	0.359234	0.11621	3.09125	0.00199314	0.0189196	1437.37	1544.74	1614.33	1108.08	1053.02	1179.84	1061.68	1028.68	1108.09	1447.25	1362.38	1393.08
1580	Kif18b	1380.4	-0.26603	0.0861163	-3.08919	0.00200701	0.0190188	1218.38	1158.33	1215.66	1547.26	1462.75	1481.7	1552.22	1573.83	1529.7	1227.28	1272.91	1324.8
1581	Rpp21	226.729	0.419289	0.13573	3.08914	0.0020074	0.0190188	242.662	284.018	315.171	158.66	185.405	194.598	222.736	205.736	187.835	237.39	235.061	251.471
1582	Clec10a	1305.54	-0.708448	0.229439	-3.08774	0.00201685	0.0190963	849.739	964.236	841.547	902.461	963.9	985.246	1526.22	1363.92	1655.38	2009.11	1785.33	1819.42
1583	Tmem230	331.67	-0.23786	0.0770937	-3.08534	0.00203322	0.019227	278.173	298.263	298.798	398.555	338.031	337.098	320.671	344.634	351.345	344.628	335.105	334.74
1584	Atl3	5834.38	-0.150572	0.0488007	-3.08545	0.00203244	0.019227	5476.38	5436.4	5252.3	5997.37	6069.19	6067.77	6204.55	6081.23	6390.43	5521.38	5594.3	5921.23
1585	Hexim2	93.8344	-0.433655	0.14063	-3.08366	0.00204469	0.0193233	63.4134	82.8014	78.588	96.4656	102.434	87.3391	104.001	97.1242	81.0797	107.238	110.617	114.911
1586	Tspan9	213.826	-0.788375	0.255754	-3.08255	0.00205238	0.0193837	136.127	138.002	141.622	219.586	243.792	229.84	157.735	146.209	163.511	346.461	307.45	335.573
1587	Cd53	10814.4	-0.214411	0.0696208	-3.07969	0.00207214	0.0195581	9507.78	9926.37	9529.62	11032.6	11339.4	11393.9	10484.2	10279.5	10728.2	13193	10863.2	11495.2
1588	Mr1	476.874	-0.434284	0.141065	-3.0786	0.00207979	0.0196178	403.309	375.722	355.283	420.133	421.002	390.727	505.273	502.331	566.206	583.851	613.274	585.379
1589	Abcc5	569.004	-0.356249	0.115799	-3.07643	0.00209493	0.0197482	462.495	454.962	495.268	543.254	509.095	566.938	563.341	569.169	562.153	659.01	694.61	747.753
1590	Prps2	1931.12	0.559647	0.181949	3.07585	0.00209904	0.0197746	2605.87	2490.27	2541.01	1438.1	1508.85	1474.04	1420.49	1386.89	1485.11	2142.93	2305.88	2373.99
1591	Ap1g2	636.005	-0.197501	0.0642375	-3.07454	0.00210825	0.0198489	559.729	564.474	594.322	630.834	696.549	717.1	637.875	656.894	595.936	633.346	692.17	652.826
1592	Csgalnact2	2230.64	-0.211634	0.068872	-3.07286	0.00212016	0.0199446	2002.17	2001.48	1981.07	2162.86	2103.99	2290.73	2177.96	2159.71	2395.9	2534.3	2431.95	2525.54
1593	Arap1	3238.38	-0.140786	0.0458178	-3.07273	0.00212108	0.0199446	2970.28	3036.05	3017.45	3147.82	3059.69	3315.82	3536.05	3405.61	3364.81	3331.71	3309.57	3365.72
1594	Atg4a	402.379	-0.284749	0.0927378	-3.07047	0.00213721	0.0200836	342.432	356.135	338.911	448.057	475.292	430.566	370.938	446.98	352.697	449.116	396.92	420.507
1595	Bcl2l1	3885.81	0.469304	0.152917	3.069	0.00214774	0.0201446	4969.07	4896.86	4861	3041.2	2824.09	3056.87	3200.64	3112.15	3320.21	4417.84	4379.95	4549.8
1596	Polr2f	908.227	0.148343	0.0483304	3.06936	0.00214516	0.0201446	984.175	949.99	1002	912.615	908.586	923.955	904.812	862.63	870.255	878.985	860.536	840.181
1597	Gm10074	73.0757	-0.581623	0.189506	-3.06916	0.00214659	0.0201446	39.739	65.885	54.0293	82.5035	93.2146	81.21	71.9343	63.7051	83.7823	97.1558	82.9628	60.7861
1598	Stau2	1318.51	-0.253609	0.0826615	-3.06804	0.00215465	0.020159	1182.03	1160.11	1112.51	1460.95	1503.73	1398.96	1440.42	1455.82	1443.22	1222.7	1250.95	1190.74
1599	Gm10134	17.9418	-1.21394	0.395697	-3.06786	0.002156	0.020159	5.91858	10.6841	10.6421	13.9621	10.2434	21.4517	21.667	16.7095	24.3239	21.081	21.1474	37.4709
1600	Thbd	426.52	0.542874	0.176927	3.06835	0.00215242	0.020159	582.557	580.5	510.004	291.935	343.153	352.421	515.674	471	471.614	394.123	319.651	285.612
1601	Pex7	270.939	-0.263811	0.0859832	-3.06817	0.00215377	0.020159	213.069	249.295	246.406	279.242	290.911	275.808	301.604	270.486	245.942	302.466	287.93	288.11
1602	Slc9a3r1	1066.13	-0.484079	0.15779	-3.06787	0.0021559	0.020159	795.626	844.04	823.537	1179.16	1174.91	1172.18	923.879	858.453	872.958	1378.51	1367.26	1403.08
1603	Kcnk13	1738.28	0.147037	0.0479355	3.0674	0.00215927	0.020177	1841.52	1864.37	1922.13	1671.65	1740.35	1559.84	1785.36	1621.87	1739.16	1660.81	1682.84	1769.46
1604	Mrpl40	520.644	0.203257	0.0662786	3.06671	0.00216427	0.0202111	557.192	584.061	591.047	508.983	487.584	548.551	471.473	507.552	449.992	504.11	540.072	497.114
1605	Nfs1	1229.45	0.315007	0.102788	3.06462	0.00217943	0.0203274	1375.65	1477.07	1475.16	1080.16	1039.7	1081.78	1064.28	1047.48	1097.28	1388.59	1335.54	1290.66
1606	Ermard	115.641	0.343037	0.111931	3.06472	0.00217872	0.0203274	144.582	134.441	135.073	96.4656	107.555	102.662	101.401	115.922	98.647	125.569	117.124	108.249
1607	Tyk2	909.354	-0.143522	0.0468411	-3.06401	0.00218389	0.0203408	829.447	863.627	839.91	936.732	908.586	920.891	937.746	922.158	886.471	968.808	938.619	959.255
1608	Gm29394	895.728	-0.162101	0.0529075	-3.06387	0.00218495	0.0203408	833.674	798.633	830.905	959.579	967.998	963.794	908.279	937.823	901.336	867.07	902.831	876.819
1609	Dnase1l1	1616.54	0.187957	0.0613458	3.0639	0.00218473	0.0203408	1734.14	1834.1	1771.51	1535.83	1482.21	1489.36	1634.56	1508.04	1658.08	1750.64	1477.88	1522.15
1610	Eea1	5412.18	-0.166069	0.054212	-3.06333	0.00218891	0.0203651	5089.13	4960.07	4825.8	5275.14	5007.98	5649.46	5590.94	5748.08	5949.9	5393.98	5625.2	5830.47
1611	Gm14326	404.092	0.299604	0.0978254	3.06264	0.00219394	0.0203991	482.787	497.699	432.234	369.362	349.299	373.872	365.738	361.344	360.805	470.197	362.759	423.005
1612	Icam1	1250.56	0.409965	0.133874	3.06231	0.00219637	0.0204091	1482.18	1531.38	1594.68	1072.54	992.582	1159.92	994.08	983.774	1031.06	1396.84	1269.66	1498
1613	Mndal	952.746	-0.563838	0.184173	-3.06146	0.00220262	0.0204291	737.286	692.683	672.091	1364.48	1212.81	1337.67	1107.61	984.819	1010.79	768.997	740.158	803.543
1614	Stk10	2722.81	-0.144562	0.0472181	-3.06158	0.00220169	0.0204291	2545.84	2541.02	2482.89	2674.38	2776.98	2840.82	2955.37	2940.88	2812.11	2579.21	2726.39	2797.83
1615	Sco2	370.965	0.275325	0.089926	3.06168	0.00220097	0.0204291	404.155	443.388	428.96	384.593	365.688	370.808	385.672	350.9	370.264	337.296	301.757	308.094
1616	Rac3	5.74948	1.44701	0.472691	3.06122	0.00220435	0.0204325	10.9917	11.5744	10.6421	1.26928	2.04867	1.53226	3.46671	3.13304	8.10797	5.49939	4.0668	6.66149
1617	B3gnt9	22.5375	-1.08634	0.355056	-3.05964	0.00221603	0.020528	15.2192	8.90338	12.2794	31.7321	25.6084	38.3066	12.1335	17.7539	18.9186	32.0797	32.5344	24.9806
1618	Mynn	797.364	-0.178654	0.0584013	-3.05908	0.00222021	0.0205414	724.603	726.515	721.209	859.305	844.053	882.584	824.211	832.344	817.554	817.575	753.172	765.239
1619	Gm11772	13.4805	-1.51333	0.494687	-3.05917	0.00221953	0.0205414	2.53653	5.34203	9.00488	22.8471	8.19469	10.7258	17.3336	28.1974	14.8646	8.24908	21.1474	13.323
1620	Stx2	905.938	-0.236776	0.0774077	-3.05882	0.00222209	0.0205461	794.781	788.839	813.714	866.921	829.712	916.294	1008.81	913.803	1062.14	987.14	887.377	1001.72
1621	Kif23	2576.81	-0.326216	0.10668	-3.0579	0.00222894	0.0205968	2216.09	2125.24	2151.35	3032.32	3031.01	2793.32	2930.24	2946.1	2766.17	2149.34	2449.03	2331.52
1622	Slc25a32	1343.19	0.206205	0.0674385	3.05768	0.0022306	0.0205994	1565.89	1437.9	1468.61	1389.87	1382.85	1346.86	1341.62	1301.26	1304.03	1203.45	1144.4	1231.54
1623	Sumf1	3014	-0.268172	0.0877481	-3.05615	0.00224196	0.0206915	2561.9	2608.69	2667.08	3413.1	3225.63	3217.75	3398.25	3287.6	3489.13	2673.62	2784.95	2840.29
1624	Dnajc16	780.906	-0.155089	0.0507535	-3.05572	0.00224521	0.0207087	697.547	728.296	733.488	779.34	835.858	798.31	781.744	783.26	818.905	769.914	820.681	823.527
1625	Zc3h12c	641.013	0.263953	0.0863876	3.05545	0.00224722	0.0207103	740.668	723.844	731.851	602.91	599.237	629.761	664.742	668.382	667.556	502.277	553.899	607.029
1626	Lcp1	70827.9	0.100408	0.0328631	3.05533	0.00224814	0.0207103	76671.8	73969.2	73120.4	70789.2	71414.7	70828.9	68042	67348.9	70921.8	66347.3	69635.9	70845
1627	Lacc1	738.25	-0.37202	0.121785	-3.05472	0.00225269	0.0207394	571.566	658.85	582.043	946.886	917.805	904.036	715.01	775.949	720.258	661.759	697.05	707.784
1628	Zfp956	112.235	-0.469261	0.153654	-3.054	0.0022581	0.0207661	87.9332	82.8014	92.5047	96.4656	129.066	90.4036	117.868	142.031	101.35	142.984	128.511	134.895
1629	Med17	1399.25	0.123807	0.0405397	3.05397	0.00225837	0.0207661	1510.93	1448.58	1513.64	1330.21	1365.44	1417.34	1378.02	1312.74	1358.08	1390.43	1355.87	1409.74
1630	Xrcc1	677.904	-0.211695	0.0693409	-3.05297	0.00226592	0.02081	596.931	592.965	627.886	685.413	639.186	675.728	728.01	784.304	744.582	670.925	666.143	722.772
1631	Med15	1599.09	0.155595	0.0509633	3.05309	0.00226501	0.02081	1729.92	1683.63	1775.6	1646.26	1502.7	1611.94	1565.22	1621.87	1610.78	1453.67	1515.29	1472.19
1632	0610012G03Rik	308.938	0.279512	0.0915754	3.05226	0.00227127	0.0208464	349.196	355.245	366.744	284.32	271.449	239.033	286.871	298.683	298.644	347.378	308.264	301.433
1633	Lman2l	588.687	-0.213031	0.0698151	-3.05135	0.00227811	0.0208964	519.99	519.957	537.018	592.756	650.453	609.841	667.342	611.987	618.908	601.266	535.192	599.534
1634	Mrpl15	1855.48	-0.179993	0.0589995	-3.05076	0.00228264	0.0209251	1740.06	1664.93	1652.8	2038.47	2030.23	2085.41	1815.69	1825.52	1855.37	1779.97	1916.28	1861.05
1635	St6galnac4	1156.58	-0.24227	0.0794373	-3.04982	0.00228976	0.0209776	957.119	1071.08	1026.56	1160.13	1203.6	1153.79	1142.28	1105.96	1105.39	1274.02	1282.67	1396.42
1636	AI987944	584.195	-0.213063	0.0699065	-3.04782	0.00230507	0.0211049	539.436	508.383	516.553	635.911	616.65	600.648	627.475	661.071	599.99	529.774	580.74	593.706
1637	Fyn	1557.72	-0.308895	0.101363	-3.0474	0.00230828	0.0211214	1295.32	1307.91	1358.1	1705.92	1684.01	1644.12	1820.89	1823.43	1825.64	1405.09	1464.05	1358.11
1638	Sgms2	394.543	-0.296759	0.0974072	-3.04658	0.00231463	0.0211665	346.66	365.929	300.435	369.362	376.956	407.582	461.94	421.916	390.534	406.038	405.867	481.293
1639	Nrn1	150.423	-0.64435	0.211514	-3.04637	0.00231625	0.0211685	103.152	111.292	101.51	217.048	214.086	225.243	160.335	135.765	162.159	120.07	121.191	133.23
1640	Nsf	3230.78	0.145609	0.0478012	3.04613	0.00231805	0.021172	3628.09	3367.26	3443.14	3216.37	3285.05	3314.29	3048.11	2984.74	3243.19	2951.34	3110.29	3177.53
1641	Incenp	6328.59	-0.216898	0.0712172	-3.04559	0.00232224	0.0211974	5731.72	5529	5663.25	6743.71	6932.71	6703.66	7092.03	6949.08	6693.13	5599.29	6232.79	6072.78
1642	B4galt5	6681.87	0.271833	0.0892681	3.04513	0.00232581	0.021217	7465.87	7845.65	7699.99	6072.25	6119.38	6515.19	5643.81	5554.88	5901.25	7173.95	7130.74	7059.52
1643	Lgmn	14698.6	0.305259	0.100257	3.04476	0.00232868	0.0212302	17229	17553	16672.1	14298.5	14020.1	12967.6	16351.6	15303.9	15502.4	12149.1	12376.9	11959
1644	Fam114a2	929.151	-0.180583	0.0593222	-3.04411	0.00233372	0.0212633	888.633	767.471	873.473	973.541	966.973	1015.89	975.88	943.045	985.118	918.397	897.951	943.434
1645	Gm26130	60.2746	0.484078	0.159072	3.04313	0.00234131	0.0213194	84.5512	73.0077	73.6763	52.0406	52.2411	47.5002	63.2675	48.0399	51.3505	69.6589	47.1749	60.7861
1646	Trappc6a	239.667	-0.440078	0.144641	-3.04255	0.00234579	0.0213374	179.248	209.229	180.916	239.895	263.254	216.049	266.07	219.313	210.807	348.294	279.796	263.129
1647	Slc7a8	10163.4	0.295423	0.0970985	3.04251	0.00234613	0.0213374	11814.3	11787.2	11804.6	9833.14	9948.35	9645.6	10830.9	10717.1	10035	7420.5	9305.66	8818.98
1648	Atf5	881.144	-0.243089	0.0799457	-3.04067	0.00236049	0.0214549	733.059	803.084	789.973	930.385	877.856	864.197	878.812	815.635	882.417	1037.55	1025.65	935.107
1649	Trpc4ap	4272.44	0.204676	0.0673275	3.04	0.00236578	0.0214664	4628.33	4677.83	4926.49	3963.97	3837.16	4034.45	3944.25	3833.8	3947.23	4525.99	4449.08	4500.67
1650	4921507P07Rik	24.3519	-0.943057	0.310223	-3.03993	0.00236632	0.0214664	14.3737	15.1357	13.9166	25.3857	21.5111	32.1775	19.9336	17.7539	22.9726	35.746	33.3478	39.969
1651	Nr2f6	302.525	-0.258297	0.0849748	-3.03968	0.00236826	0.0214664	263.8	248.404	278.333	309.705	286.814	317.179	338.005	296.594	336.481	347.378	291.183	316.421
1652	Pde10a	414.521	-0.369878	0.121686	-3.0396	0.00236891	0.0214664	325.522	353.464	338.911	474.712	479.389	488.792	474.94	478.311	463.506	370.292	337.545	388.865
1653	Rhod	290.409	-0.490861	0.161464	-3.04006	0.00236533	0.0214664	224.906	229.707	212.024	408.709	344.177	326.372	338.005	334.191	336.481	263.054	239.128	228.156
1654	Snord99	6.47791	1.38272	0.454967	3.03917	0.00237235	0.0214845	13.5282	8.90338	13.9166	3.80785	6.14602	1.53226	3.46671	9.39912	4.05398	6.41595	4.0668	2.49806
1655	Ctbs	796.613	-0.148485	0.0488609	-3.03893	0.00237423	0.0214885	741.514	722.064	745.768	836.458	842.004	824.358	809.478	846.965	775.662	801.994	798.72	814.368
1656	Parp11	306.715	-0.297123	0.0978279	-3.0372	0.00238788	0.021599	249.426	292.031	246.406	327.475	328.812	298.792	324.138	283.018	297.292	335.463	318.024	379.705
1657	Il12rb1	32.1781	-1.56304	0.514708	-3.03676	0.00239136	0.0216045	16.0647	16.0261	7.36763	17.77	35.8518	38.3066	17.3336	19.8426	17.5673	55.9104	68.3223	75.7745
1658	Pvt1	94.6839	0.374526	0.123328	3.03683	0.00239079	0.0216045	118.372	106.841	117.882	90.1192	92.1903	91.9358	89.2679	91.9025	77.0257	71.492	98.4167	90.7628
1659	Abtb1	260.533	-0.434973	0.143302	-3.03536	0.00240249	0.0216919	187.704	208.339	224.303	257.665	227.403	228.307	329.338	271.53	247.293	346.461	272.476	325.58
1660	Exoc6	1055.2	-0.158426	0.0522028	-3.03482	0.00240679	0.0217176	1003.62	992.726	916.042	1127.12	1133.94	1113.96	1090.28	1029.73	1027.01	1045.8	1100.48	1081.66
1661	Lmna	8634.17	0.21949	0.0723646	3.03311	0.00242045	0.0218278	8787.4	10018.1	10158.3	8754.25	8395.46	8781.41	8689.32	8436.23	8851.2	7656.06	7538.23	7544.14
1662	Zfhx3	1620.55	-0.43529	0.143532	-3.03271	0.00242369	0.0218307	1313.92	1353.31	1177.18	2029.58	1810	1864.77	1943.96	1941.44	1845.91	1200.7	1411.18	1554.63
1663	Maged1	952.806	-0.168211	0.0554657	-3.03271	0.00242367	0.0218307	857.349	906.364	850.552	1044.62	969.022	1015.89	956.813	909.626	981.064	945.894	958.953	1037.53
1664	Mindy4	48.2749	-0.75489	0.248956	-3.03223	0.00242756	0.0218524	26.2109	40.9555	29.4705	45.6942	48.1438	33.7098	46.8006	52.2173	48.6478	81.5742	64.2555	61.6188
1665	Adam10	5560.13	0.183121	0.0604072	3.03144	0.00243393	0.0218966	6456.33	6020.46	5836.8	5683.85	5652.29	5784.3	5381.21	5374.21	5258.02	4803.71	5107.09	5363.33
1666	Galnt11	768.207	-0.168872	0.0557106	-3.03124	0.00243554	0.0218979	736.441	681.999	689.283	726.03	815.372	793.713	786.077	793.703	832.418	817.575	788.96	756.912
1667	Tram1	8001.45	-0.273911	0.0903783	-3.03072	0.0024397	0.0219221	7231.66	6851.15	6664.43	8805.02	8487.65	8897.86	8886.92	8968.85	9275.52	6998.88	7491.87	7457.54
1668	Tapbpl	315.423	-0.261144	0.086172	-3.0305	0.00244151	0.0219253	284.092	285.798	256.23	286.858	303.204	324.84	335.405	317.481	329.724	362.959	356.252	342.234
1669	Pan3	1076.68	0.278492	0.0919232	3.02962	0.00244864	0.021964	1275.03	1234.01	1211.57	995.119	935.219	959.197	1145.75	1221.89	1041.87	877.152	983.353	1040.03
1670	Cul9	14.8669	-2.5682	0.847738	-3.02947	0.0024498	0.021964	0.845512	5.34203	3.2745	31.7321	37.9004	29.113	23.4003	21.9313	14.8646	0.916564	3.25344	5.82881
1671	Slk	5703.01	0.14006	0.0462333	3.02942	0.00245022	0.021964	6442.8	6014.23	5930.94	5455.38	5397.23	5214.29	5761.68	5753.3	5818.82	5327.99	5643.91	5675.59
1672	Cybb	9554.2	0.259609	0.0857486	3.02756	0.0024654	0.0220868	10984.9	10529.1	11189	9258.16	9051.03	9506.17	8179.71	7831.55	8190.4	10027.2	9695.26	10207.9
1673	Sssca1	1403.51	0.183035	0.0604636	3.0272	0.0024683	0.0220996	1477.95	1534.94	1606.14	1393.67	1277.35	1368.31	1400.55	1349.3	1527	1308.85	1260.71	1337.29
1674	Btbd2	218.537	-0.40699	0.134466	-3.0267	0.00247236	0.0221228	180.939	173.616	173.549	232.279	186.429	231.372	206.269	213.047	205.402	256.638	279.796	283.113
1675	Cd300ld	1157.01	-0.390803	0.129156	-3.02583	0.00247949	0.0221733	900.47	944.648	967.615	1166.47	1111.4	1219.68	1374.55	1303.34	1627	1208.03	945.939	1114.97
1676	Gm17119	21.2718	0.816232	0.269836	3.02492	0.00248699	0.0222271	33.8205	29.3811	31.9264	16.5007	9.21903	15.3226	16.4669	16.7095	18.9186	18.3313	19.5207	29.144
1677	Dag1	4407.6	0.121633	0.0402189	3.02428	0.00249222	0.0222447	4745.86	4667.15	4658.8	4266.06	4125	4474.21	4362.86	4231.69	4548.57	4064.05	4400.28	4346.62
1678	Cuta	928.853	0.167305	0.0553231	3.02414	0.00249341	0.0222447	984.175	989.165	1066.67	902.461	850.199	855.003	903.945	886.65	874.309	923.897	963.833	945.932
1679	Rasal3	678.382	0.159906	0.0528711	3.02445	0.00249086	0.0222447	722.912	755.006	727.758	634.642	649.429	710.971	638.742	657.938	686.475	633.346	656.382	666.982
1680	Cep164	893.488	-0.182611	0.0603884	-3.02394	0.00249507	0.0222462	827.756	822.672	783.424	896.114	906.538	940.81	974.146	967.065	936.47	814.826	940.245	911.792
1681	Cnnm3	634.034	-0.318351	0.10529	-3.02356	0.00249819	0.0222608	561.42	526.189	515.734	690.49	634.064	680.325	795.611	716.422	737.825	595.767	576.673	577.885
1682	Ccnl1	2292.49	0.306397	0.101396	3.02179	0.00251285	0.0223781	2944.92	2612.25	2476.34	1985.16	1830.49	2106.86	2246.43	2195.22	1909.43	2241	2568.59	2393.14
1683	Pcdhb14	26.8879	-1.25379	0.415006	-3.02115	0.0025182	0.0224124	13.5282	13.3551	12.2794	31.7321	24.5841	36.7743	45.934	30.286	62.1611	17.4147	15.4539	19.1518
1684	Meis1	260.537	0.292045	0.0966982	3.02017	0.00252633	0.0224715	325.522	292.921	286.519	260.203	247.889	216.049	263.47	247.51	298.644	223.642	234.248	229.822
1685	Mfsd12	2611.61	0.182599	0.0604715	3.01959	0.0025312	0.0225014	2676.89	2863.33	3061.66	2543.64	2421.53	2356.62	2627.77	2588.93	2699.95	2556.3	2318.89	2623.8
1686	Slc25a53	50.9748	0.474584	0.157192	3.01914	0.00253493	0.0225212	68.4864	56.0913	68.7645	46.9635	53.2655	42.9034	44.2006	51.173	47.2965	41.2454	47.1749	44.1324
1687	Lrfn1	191.405	0.300747	0.0996517	3.01798	0.00254468	0.0225944	219.833	219.913	230.034	156.122	156.723	173.146	188.936	210.958	187.835	183.313	196.02	174.032
1688	Fut4	246.274	0.334533	0.110864	3.01751	0.00254862	0.022616	305.23	253.746	314.352	233.548	195.648	217.582	252.203	252.732	271.617	216.309	238.315	204.008
1689	Rabgap1l	205.38	0.328239	0.108825	3.0162	0.00255965	0.0227004	246.889	254.637	226.759	180.238	197.697	163.952	227.936	168.14	229.726	192.478	186.26	189.853
1690	Pcdhgb7	132.603	-0.356156	0.118123	-3.01514	0.00256862	0.0227665	109.071	105.95	112.152	152.314	143.407	167.017	146.469	133.676	132.43	118.237	144.778	125.736
1691	Spn	1054.39	-1.26415	0.419344	-3.0146	0.00257321	0.0227937	507.307	501.26	532.925	1810	1694.25	1875.49	1302.62	1282.46	1455.38	590.267	530.311	570.39
1692	Rsu1	2362.1	0.20815	0.0690526	3.01437	0.0025751	0.0227969	2632.92	2655.88	2596.68	2159.05	2196.18	2148.23	2135.5	2145.09	2187.8	2473.81	2502.71	2511.38
1693	Gas7	9013.77	0.807235	0.267859	3.01366	0.00258117	0.0228371	13129.9	13329.2	13391.1	5237.07	4763.16	5749.06	5811.94	5725.11	7321.5	10977.7	10776.2	11953.2
1694	Nit1	431.927	-0.315553	0.104742	-3.01268	0.00258955	0.0228911	373.716	378.393	345.46	397.286	423.051	399.921	430.739	416.694	472.965	532.524	497.777	514.6
1695	Akap3	43.0565	-0.702887	0.233317	-3.01259	0.00259032	0.0228911	31.2839	35.6135	20.4656	52.0406	52.2411	67.4196	43.3339	30.286	47.2965	41.2454	47.9883	47.4631
1696	Timp2	4601.69	0.155723	0.051698	3.01216	0.00259393	0.0229004	4921.72	4851.45	5181.9	4564.34	4327.82	4396.07	4486.79	4143.97	4428.3	4339.93	4714.24	4863.72
1697	Gramd3	277.004	-0.360233	0.119595	-3.0121	0.00259443	0.0229004	218.142	250.185	217.754	284.32	297.058	301.856	256.537	225.579	289.184	337.296	316.397	329.744
1698	Ttc8	208.8	-0.332625	0.110439	-3.01184	0.00259666	0.0229066	158.111	194.984	170.274	243.703	240.719	240.565	227.936	221.401	209.456	181.48	218.794	198.179
1699	Uhrf1	9069.67	0.291625	0.0968585	3.01083	0.00260531	0.0229694	10366.8	10577.2	10597.1	8343	8861.53	8448.9	7415.3	7758.45	7414.74	9412.2	9910.8	9729.94
1700	Aldh3a2	1492.71	0.154335	0.0512759	3.00988	0.00261349	0.0230279	1652.13	1600.83	1591.41	1561.22	1531.38	1394.36	1448.22	1383.76	1525.65	1374.85	1430.7	1418.07
1701	Gm27326	12.8751	0.933545	0.310206	3.00943	0.00261734	0.0230483	21.9833	18.6971	19.647	11.4236	7.17035	10.7258	8.66678	6.26608	10.8106	12.8319	15.4539	10.8249
1702	Myrf	12.7052	0.992714	0.330027	3.00798	0.00262991	0.0231454	19.4468	16.0261	25.3774	11.4236	10.2434	7.66132	6.93343	6.26608	12.162	15.5816	13.0138	8.32687
1703	Ppp2r5d	1827.86	0.21126	0.0702447	3.00749	0.00263418	0.0231694	1972.58	2071.82	2068.67	1655.15	1639.96	1670.17	1749.82	1667.82	1667.54	1866.12	1954.51	1950.15
1704	Pld1	501.693	-0.313737	0.10434	-3.00687	0.00263956	0.0231894	454.04	382.845	433.871	601.641	570.555	588.389	546.007	529.484	497.289	429.869	472.563	513.768
1705	Gm15899	131.082	0.307731	0.102338	3.00702	0.00263826	0.0231894	145.428	151.357	163.725	119.313	119.847	117.984	121.335	131.588	120.268	116.404	135.831	129.899
1706	Phkb	1110.34	-0.239257	0.0796366	-3.00436	0.00266144	0.0233656	975.72	953.552	1002	1246.44	1229.2	1176.78	1206.42	1238.59	1187.82	984.39	1058.18	1065.01
1707	Gm22680	28.344	0.716123	0.238373	3.00421	0.00266273	0.0233656	43.9666	37.3942	38.4754	21.5778	17.4137	32.1775	24.267	31.3304	22.9726	20.1644	17.0806	33.3075
1708	ENSMUSG00000115219.2	243.402	0.272679	0.0907716	3.00401	0.00266446	0.0233671	260.418	267.101	308.622	234.818	228.427	229.84	232.27	228.712	260.806	248.389	206.594	214.833
1709	Odc1	2215.83	0.269897	0.0898594	3.00354	0.00266854	0.0233892	2556.83	2549.04	2520.55	1994.05	2206.42	2083.88	1950.89	2023.94	1749.97	2501.3	2176.55	2276.57
1710	Cd80	25.2165	-1.26186	0.420198	-3.00301	0.00267327	0.0234169	15.2192	8.01304	13.098	26.655	37.9004	62.8228	28.6004	33.4191	25.6752	18.3313	18.7073	14.1557
1711	Syn1	117.888	1.22266	0.407306	3.00182	0.00268371	0.0234946	215.605	194.094	210.387	78.6956	48.1438	88.8713	44.2006	38.6408	47.2965	140.234	158.605	149.884
1712	Arpc2	26059.3	0.115605	0.0385165	3.00144	0.00268703	0.0234962	28254.5	27566.6	27144	26703.2	26816.1	25703.7	25309.6	24719.7	25852.3	24175.3	25675.4	24791.6
1713	Gm16163	141.787	0.354648	0.118157	3.00149	0.00268663	0.0234962	170.793	180.739	159.632	110.428	132.139	116.452	118.735	153.519	124.322	137.485	143.152	154.047
1714	Zfp277	706.439	0.167006	0.0556467	3.00119	0.00268928	0.0235022	766.033	774.594	765.415	734.915	674.013	683.39	638.742	683.003	695.934	717.67	647.435	696.126
1715	Hspe1	1916.02	-0.278146	0.0927444	-2.99906	0.00270815	0.0236408	1562.51	1667.6	1724.84	2206.02	2366.22	2203.4	1920.56	1953.97	1874.29	1932.12	1847.96	1732.82
1716	Tmsb10	7040.08	-0.451618	0.150587	-2.99904	0.0027083	0.0236408	5509.35	5409.69	5638.69	6131.91	6234.11	6751.16	6574.62	6634.73	7398.52	9444.28	9665.17	9088.78
1717	Gm42420	455.603	-0.302375	0.100873	-2.99758	0.00272131	0.0237405	382.171	365.929	415.862	478.52	465.049	479.599	455.006	437.581	432.425	607.682	463.616	483.791
1718	Prcc	1380.67	-0.123217	0.0411095	-2.99729	0.00272387	0.0237491	1302.93	1295.44	1284.42	1323.86	1425.88	1421.94	1430.02	1374.36	1470.25	1404.18	1424.2	1410.57
1719	Wdr59	414.681	-0.212619	0.0709725	-2.9958	0.00273729	0.0238521	403.309	344.561	364.288	421.402	432.27	416.776	416.006	448.025	421.614	439.951	407.494	460.476
1720	Fpgs	407.918	0.211493	0.0707562	2.98904	0.00279856	0.0243719	446.43	445.169	474.803	387.132	368.761	372.34	397.805	405.206	363.507	411.537	435.961	386.367
1721	Gm336	16.1502	-1.17957	0.395045	-2.9859	0.00282743	0.024609	10.9917	9.79371	4.09313	21.5778	27.6571	19.9194	18.2002	27.153	12.162	10.9988	16.2672	14.9884
1722	Ick	222.135	-0.269575	0.0903382	-2.98406	0.00284447	0.0247429	197.004	183.41	195.651	267.819	239.695	214.517	232.27	229.756	245.942	212.643	220.421	226.491
1723	Trio	4450.18	-0.162835	0.0545731	-2.98379	0.00284701	0.0247506	4252.08	4160.55	3843.45	4389.18	4287.87	4489.53	4792.73	4812.35	4509.38	4318.85	4718.31	4827.92
1724	Tyw5	281.964	-0.33742	0.113127	-2.98268	0.00285739	0.0248265	222.37	257.308	226.759	305.897	362.615	312.582	273.87	290.328	248.644	332.713	277.356	273.121
1725	Cradd	115.811	-0.486405	0.163113	-2.98201	0.00286362	0.0248662	77.7871	88.1434	99.8723	152.314	132.139	139.436	148.202	119.055	124.322	109.988	92.7232	105.751
1726	Abhd15	55.5561	-1.75467	0.588646	-2.98086	0.00287438	0.0249452	18.6013	23.1488	18.0098	134.544	104.482	88.8713	87.5345	68.9269	74.323	12.8319	17.0806	18.3191
1727	Ptov1	825.351	-0.225224	0.0755907	-2.97953	0.00288695	0.0250253	735.595	758.568	707.292	756.493	781.569	801.374	886.612	848.009	868.904	914.731	953.259	891.807
1728	Capn7	1289.96	0.141213	0.047392	2.97968	0.00288551	0.0250253	1358.74	1419.2	1382.66	1182.97	1259.93	1323.88	1236.75	1198.91	1264.84	1327.18	1236.31	1288.17
1729	Atp13a2	3618.34	0.145435	0.0488208	2.97896	0.00289225	0.0250567	3720.25	3915.7	4062.84	3386.45	3286.07	3435.34	3731.05	3479.76	3656.69	3566.35	3499.08	3680.48
1730	3110040N11Rik	191.941	-0.324392	0.108963	-2.97707	0.0029102	0.0251976	172.484	146.906	163.725	228.471	189.502	212.985	182.002	177.539	201.348	225.475	217.167	185.689
1731	Trp53rka	328.901	0.286312	0.0961899	2.97653	0.00291527	0.025227	355.96	366.819	414.224	297.012	283.741	344.759	298.137	288.24	385.129	307.049	299.317	306.429
1732	Gm14292	306.408	0.219576	0.0737801	2.97609	0.00291949	0.0252489	344.969	329.425	352.009	312.244	310.374	294.195	297.271	296.594	290.536	294.217	294.437	260.631
1733	Gpcpd1	979.575	-0.351192	0.118123	-2.9731	0.00294811	0.0254817	818.455	798.633	815.351	1163.93	1148.28	1172.18	1058.21	1102.83	1105.39	880.818	856.469	834.352
1734	Tgfbrap1	1444.63	-0.361537	0.121754	-2.9694	0.00298378	0.0257751	1265.73	1169.9	1133.8	1524.41	1527.29	1656.38	1771.49	1727.35	1714.84	1164.95	1336.35	1343.12
1735	Rbm45	938.22	0.150605	0.0507327	2.96859	0.00299166	0.0258226	1009.54	998.959	1030.65	891.037	987.46	950.004	928.212	922.158	882.417	875.319	906.897	875.986
1736	Impdh1	931.594	-0.31665	0.106671	-2.96848	0.00299272	0.0258226	714.457	800.413	842.365	1116.97	1083.75	1117.02	988.013	979.597	987.821	865.237	849.962	833.519
1737	Shtn1	4150.59	0.218189	0.0735099	2.96815	0.00299597	0.0258357	4644.4	4487.3	4779.13	4148.02	4108.61	4261.23	4099.39	4148.14	4352.63	3524.19	3656.06	3598.04
1738	ENSMUSG00000116305.1	27.5982	-0.972457	0.327779	-2.96681	0.00300907	0.0259337	11.8372	24.0391	12.2794	29.1935	32.7788	35.2421	37.2672	51.173	24.3239	30.2466	21.1474	21.6499
1739	Inf2	1379.65	0.496626	0.16741	2.96653	0.00301185	0.0259428	1746.83	1721.91	1829.63	1054.77	1086.82	1149.2	1113.68	968.109	1077.01	1519.66	1651.94	1636.23
1740	Bzw1	13316.5	-0.304453	0.102676	-2.96519	0.00302494	0.0260355	11275.7	11170.2	11515.6	15707.4	16112.8	15491.2	14025.5	14163.4	14322.7	11783.3	12287.4	11943.2
1741	Spast	1876.13	0.201909	0.0680956	2.96507	0.00302609	0.0260355	2131.53	2051.34	2053.11	1971.2	1874.54	1829.52	1959.56	1788.97	1871.59	1621.4	1641.36	1719.5
1742	Smco3	126.3	-0.501301	0.169148	-2.96368	0.00303979	0.0261384	81.1691	97.9371	108.059	152.314	148.529	156.291	143.002	148.297	159.457	109.988	109.804	100.755
1743	Mlf2	5005.06	-0.278101	0.0938441	-2.96343	0.00304227	0.0261447	4175.98	4285.19	4491.8	4790.28	4785.7	4947.68	4944.4	4689.12	5044.51	6003.5	5918.83	5983.69
1744	Isg15	25.5958	-0.871141	0.294072	-2.96234	0.00305312	0.0262229	17.7557	18.6971	10.6421	38.0785	33.8031	36.7743	30.3337	17.7539	27.0266	22.9141	31.7211	21.6499
1745	Cdk5rap2	1174.85	-0.258272	0.0871918	-2.96212	0.00305532	0.0262267	1023.07	1027.45	1019.19	1379.71	1294.76	1279.44	1221.15	1320.05	1264.84	1020.14	1148.47	1099.98
1746	Tmem140	385.801	-0.45499	0.153618	-2.96182	0.00305826	0.026237	269.718	353.464	284.063	342.707	319.593	367.743	391.739	377.009	433.776	494.945	499.404	495.449
1747	Arhgef10l	1346.94	0.211832	0.0715812	2.95933	0.00308308	0.0264347	1412	1581.24	1507.91	1311.17	1224.08	1222.75	1432.62	1375.4	1422.95	1242.86	1205.4	1224.88
1748	Coro1c	8688.05	0.141137	0.0476987	2.95893	0.00308707	0.0264538	9139.13	9325.4	9551.72	8590.51	8681.25	8893.26	8619.12	8543.8	8784.98	7656.06	8342.64	8128.69
1749	Gm10060	141.152	0.471698	0.159438	2.9585	0.00309142	0.0264759	206.305	163.822	165.362	159.93	146.48	105.726	160.335	139.942	116.214	118.237	106.55	104.919
1750	Phf8	1026.14	0.859273	0.290663	2.95625	0.00311401	0.0266541	1660.58	1519.81	1462.06	607.987	557.239	589.922	658.676	632.874	666.205	1283.19	1310.32	1364.77
1751	L2hgdh	482.342	0.211608	0.0715882	2.9559	0.00311754	0.0266692	545.355	533.312	530.469	491.213	514.217	502.583	443.739	469.956	428.371	453.699	453.855	421.339
1752	Khsrp	6825.66	0.202068	0.0684017	2.95413	0.0031355	0.0268074	7565.64	7586.57	7555.09	6366.73	6334.5	6337.44	6196.75	6290.1	6164.76	6708.33	7493.49	7308.49
1753	Ptafr	1101.66	0.272643	0.0923479	2.95235	0.00315367	0.0269474	1116.92	1300.78	1374.47	1124.59	1163.65	1167.59	930.813	958.71	1027.01	967.892	980.913	1106.64
1754	Actr5	502.538	0.263499	0.0893143	2.95025	0.00317521	0.027116	615.532	588.513	521.464	432.826	441.489	496.454	437.673	459.512	463.506	500.444	537.632	535.418
1755	Neurl2	297.677	0.674967	0.228937	2.94826	0.00319567	0.0272752	400.772	416.678	425.685	191.662	213.062	191.533	202.803	207.825	229.726	374.875	361.946	355.557
1756	Ints10	1764.89	0.343426	0.116494	2.94801	0.00319827	0.0272819	2107.86	2035.31	2154.62	1520.6	1507.82	1576.7	1430.89	1518.48	1455.38	1925.7	1962.64	1982.63
1757	Ifi27	614.439	-0.343509	0.116553	-2.94723	0.00320634	0.0273351	482.787	482.563	566.489	668.913	622.796	680.325	758.344	662.116	764.852	560.937	531.938	591.208
1758	Cdk2ap2	281.41	-0.271106	0.0920305	-2.94582	0.00322097	0.0274442	235.898	237.72	259.504	289.397	314.471	255.888	309.404	265.264	281.076	333.629	309.891	284.779
1759	Tox4	1868.56	-0.135113	0.04589	-2.94428	0.00323707	0.0275657	1762.89	1701.44	1751.86	2058.78	1952.38	1953.64	1931.83	1914.29	1901.32	1812.96	1853.65	1827.75
1760	Hacd3	1635.74	0.172344	0.0585435	2.94387	0.00324139	0.0275868	1756.13	1795.81	1803.43	1674.19	1636.89	1636.46	1678.76	1591.58	1635.11	1425.26	1502.28	1493.01
1761	Lsm3	1381.05	-0.301679	0.102494	-2.94337	0.00324661	0.0276155	1072.11	1273.18	1182.91	1463.48	1712.69	1464.84	1291.35	1308.57	1331.06	1647.07	1541.32	1284
1762	Gm20517	390.689	0.305695	0.103881	2.94273	0.00325332	0.0276569	472.641	477.221	421.592	309.705	328.812	350.888	359.672	356.122	355.399	431.702	414.001	410.515
1763	Snora78	9.4817	1.33918	0.455157	2.94223	0.00325857	0.0276859	15.2192	21.3681	16.3725	7.6157	2.04867	4.59679	4.33339	8.35477	1.35133	11.9153	8.94697	11.6576
1764	Raly	7479.56	0.129555	0.0440429	2.94157	0.00326551	0.0277291	7689.93	7896.4	8401.55	7072.45	7064.85	7125.03	7366.77	7148.55	7252.58	7887.95	7456.89	7391.76
1765	Gab1	28.139	0.705942	0.24001	2.9413	0.00326834	0.0277374	48.1942	32.9425	38.4754	16.5007	16.3894	22.984	24.267	22.9756	28.3779	24.7472	26.8409	34.9728
1766	Dancr	27.4525	0.840269	0.285846	2.93959	0.00328647	0.0278754	45.6576	37.3942	40.9313	22.8471	7.17035	16.8549	21.667	29.2417	21.6213	28.4135	27.6543	29.9767
1767	Rnd3	170.805	0.679192	0.231068	2.93936	0.00328888	0.0278801	260.418	216.352	238.22	111.697	76.8252	113.388	157.735	150.386	154.051	211.726	176.499	182.358
1768	Qk	10469.4	0.314202	0.107042	2.93532	0.00333207	0.0282142	12829.8	12780.8	11204.5	9016.99	8443.6	9090.92	9371.39	9500.42	9440.38	10348.9	11564.4	12040.6
1769	Gpatch11	485.675	0.210402	0.0716782	2.93537	0.00333148	0.0282142	548.737	533.312	539.474	472.174	485.535	484.195	440.273	446.98	452.695	496.778	511.604	416.343
1770	Ptdss1	1119	0.186849	0.063724	2.93216	0.00336616	0.0284708	1283.49	1172.57	1234.49	1095.39	1100.14	1104.76	1148.35	1125.81	1116.2	973.391	979.287	1094.15
1771	Sat1	1129.78	0.715065	0.243866	2.9322	0.00336567	0.0284708	1508.39	1567.88	1720.75	844.074	856.345	769.197	744.477	722.688	648.638	1560.91	1287.55	1326.47
1772	Csk	4342.92	-0.130037	0.044384	-2.92982	0.00339158	0.0286696	4105.8	3992.27	4066.93	4602.42	4500.93	4284.21	4597.73	4513.67	4690.46	4193.28	4353.11	4214.23
1773	Efna1	29.4832	-0.896736	0.306156	-2.92902	0.00340032	0.0286912	18.6013	12.4647	22.9215	30.4628	27.6571	30.6453	25.1337	24.02	28.3779	40.3288	38.228	54.9573
1774	Lockd	101.074	-0.645572	0.220429	-2.92871	0.00340372	0.0286912	52.4217	81.0207	80.2253	66.0028	99.3606	98.0649	149.069	139.942	117.566	118.237	91.9098	119.074
1775	Cmas	1599.19	-0.185592	0.0633677	-2.92882	0.00340257	0.0286912	1418.77	1467.28	1464.52	1575.18	1671.72	1723.8	1480.29	1547.72	1593.22	1758.89	1717.82	1771.12
1776	Xylt2	2396.21	0.160313	0.0547363	2.92882	0.00340255	0.0286912	2451.14	2719.09	2635.15	2240.29	2185.93	2292.27	2503.83	2302.78	2431.04	2456.39	2238.37	2298.22
1777	A630033H20Rik	609.389	0.216343	0.0738555	2.92927	0.00339754	0.0286912	702.62	656.179	677.822	623.218	595.139	645.083	602.341	585.878	587.828	588.434	500.217	547.908
1778	Csnk1e	1225.24	-0.187592	0.0640652	-2.92814	0.00340994	0.0287275	1141.44	1100.46	1089.59	1241.36	1158.52	1247.26	1199.48	1206.22	1244.57	1335.43	1339.61	1398.91
1779	Ccnh	655.551	0.159205	0.0544014	2.92649	0.00342813	0.0288645	717.839	681.108	734.307	637.181	655.575	654.277	656.942	601.544	627.016	608.599	635.235	656.99
1780	Ssr2	3600.02	0.149471	0.0510861	2.92587	0.00343492	0.0289054	3870.75	3906.8	3887.65	3447.38	3293.24	3475.18	3458.05	3336.69	3385.08	3815.66	3735.77	3588.05
1781	Gpr146	133.11	0.62073	0.212184	2.92543	0.00343984	0.0289306	173.33	188.752	181.735	95.1963	100.385	75.0809	110.068	97.1242	109.458	176.897	160.232	129.066
1782	Gcdh	300.337	-0.23408	0.0800216	-2.92521	0.00344224	0.0289345	282.401	256.417	256.23	303.359	326.763	309.517	312.004	349.856	314.859	305.216	299.317	288.11
1783	Fkbp1a	6826.84	0.28544	0.0975945	2.92476	0.00344727	0.028959	8016.3	7989.89	7664.79	6057.02	6061	6000.35	5989.61	5789.86	6001.25	7340.76	7553.68	7457.54
1784	Slc30a6	406.857	0.249746	0.085395	2.9246	0.00344901	0.028959	452.349	480.782	455.974	342.707	410.759	396.856	363.138	383.275	336.481	408.788	413.187	437.993
1785	Hspa4l	467.139	0.242924	0.0830765	2.9241	0.00345455	0.0289892	541.973	508.383	535.381	408.709	372.858	447.421	476.673	489.798	482.424	438.118	435.961	467.97
1786	Serac1	201.014	0.386511	0.132264	2.92227	0.00347493	0.0291439	261.263	243.952	229.215	173.892	179.259	177.743	167.269	156.652	160.808	240.14	218.794	203.176
1787	Mocos	215.362	0.399514	0.13681	2.92021	0.00349798	0.0293208	247.735	280.456	262.779	167.545	160.821	197.662	198.469	172.317	204.051	239.223	197.647	255.635
1788	Tlr8	1657.04	0.546845	0.187292	2.91975	0.00350317	0.0293478	2234.69	2066.47	2209.47	1538.37	1466.85	1437.26	2018.49	1824.47	1817.54	1055.88	1119.18	1095.82
1789	Anxa4	2370.59	-0.21955	0.075222	-2.9187	0.00351496	0.0294302	2067.28	2063.8	2198.83	2315.17	2301.68	2710.58	2378.17	2120.02	2575.63	2542.55	2492.14	2681.25
1790	Man1a2	2931.05	0.186909	0.0640449	2.91841	0.00351825	0.0294413	3382.89	3165.15	3129.6	2777.19	2731.9	2871.46	2688.44	2573.27	2706.71	3042.99	3041.16	3061.79
1791	Gm25744	12.4309	1.16879	0.400836	2.91588	0.00354692	0.0296646	16.9102	26.7101	21.2843	6.34642	3.07301	9.19358	7.8001	9.39912	5.40531	10.9988	17.8939	14.1557
1792	Dhx35	775.115	0.181759	0.0624285	2.91147	0.00359732	0.0300556	870.031	869.86	813.714	780.61	819.469	735.487	717.61	759.24	672.961	778.163	719.824	764.406
1793	Fbxw8	2058.4	-0.115575	0.039697	-2.91144	0.00359768	0.0300556	1884.65	1950.73	1976.16	2145.09	2189.01	2017.99	2036.69	2062.58	2149.96	2075.1	2058.62	2154.16
1794	Serf1	136.782	0.432485	0.148588	2.91062	0.00360708	0.0301116	169.102	159.37	182.553	125.659	124.969	108.791	104.868	99.2129	114.863	162.232	140.711	149.051
1795	Cd200r1	60.6288	-7.09933	2.43921	-2.91051	0.00360841	0.0301116	0	1.78068	0	242.433	249.938	225.243	1.73336	2.08869	2.70266	0	1.62672	0
1796	Snord78	224.302	0.40901	0.14056	2.90986	0.00361594	0.0301577	253.653	290.25	284.063	190.393	153.65	203.791	208.003	248.554	163.511	219.975	231.808	243.977
1797	2510016D11Rik	28.7996	-1.46665	0.504258	-2.90853	0.00363134	0.0302692	14.3737	10.6841	12.2794	38.0785	58.3872	30.6453	13.0002	12.5322	10.8106	48.5779	50.4284	45.7978
1798	Spaca9	8.58839	-1.91779	0.659493	-2.90798	0.00363777	0.0302744	4.22756	2.67101	1.63725	5.07714	7.17035	9.19358	5.20007	6.26608	6.75664	13.7485	21.9607	19.1518
1799	Slc7a2	947.285	0.48588	0.167084	2.908	0.00363752	0.0302744	1250.51	1228.67	1141.16	788.225	783.617	766.132	719.343	678.825	717.555	1070.55	1034.6	1188.24
1800	Coasy	544.411	-0.189961	0.0653246	-2.90795	0.00363802	0.0302744	472.641	485.234	518.19	611.795	565.434	525.567	571.141	573.346	574.314	575.602	540.072	519.596
1801	Sgsm2	225.329	-0.357104	0.122869	-2.90637	0.00365651	0.0304022	187.704	178.068	193.196	194.2	208.965	232.904	222.736	215.135	278.374	248.389	257.835	286.444
1802	Gm11702	32.4525	-0.632423	0.217605	-2.90629	0.00365744	0.0304022	19.4468	24.9295	24.5588	33.0014	32.7788	33.7098	38.1338	33.4191	43.2425	32.0797	34.1612	39.969
1803	Pam	1973.37	0.162111	0.0557937	2.90554	0.00366617	0.0304579	2125.62	2118.11	2186.55	1912.81	1785.42	1898.48	2023.69	2007.23	2047.26	1960.53	1752.79	1861.89
1804	Hoxa13	9.26119	1.44269	0.496702	2.90455	0.00367785	0.030538	17.7557	19.5874	16.3725	7.6157	1.02434	4.59679	4.33339	5.22173	1.35133	11.9153	12.2004	9.15955
1805	Nme3	367.105	0.416678	0.143482	2.90405	0.00368368	0.0305695	418.528	469.208	472.347	316.052	307.301	271.211	337.138	297.639	283.779	440.867	379.84	411.347
1806	Gm7582	25.706	-0.714058	0.24603	-2.90232	0.00370415	0.0307223	19.4468	16.9164	15.5539	25.3857	27.6571	36.7743	28.6004	26.1087	25.6752	31.1632	25.2142	29.9767
1807	Sertad3	102.57	-0.554668	0.191214	-2.90076	0.00372258	0.030858	72.714	73.898	81.8625	79.9649	110.628	113.388	87.5345	89.8138	105.404	130.152	145.592	139.891
1808	Zfp949	93.5764	-0.464499	0.160161	-2.9002	0.00372928	0.0308965	65.1044	69.4463	84.3184	91.3884	81.9469	105.726	91.0012	87.7251	95.9443	124.653	104.924	120.74
1809	Ap2a1	2310.41	-0.12239	0.0422211	-2.89878	0.00374621	0.0310196	2105.32	2251.66	2139.89	2349.44	2344.71	2397.99	2375.57	2421.84	2459.42	2198.84	2361.19	2319.03
1810	mt-Co1	296634	0.17361	0.0599296	2.8969	0.00376874	0.0311889	315964	324710	331927	309175	301451	294826	296602	279766	305488	266946	266275	266481
1811	Naxe	904.841	-0.175966	0.0607476	-2.89668	0.00377133	0.0311931	798.163	848.492	830.086	889.768	877.856	838.148	976.746	933.646	1013.5	954.143	952.446	945.099
1812	Gm27010	11.4733	0.951377	0.328496	2.89616	0.00377754	0.0312272	21.9833	16.0261	16.3725	10.1543	9.21903	10.7258	6.93343	8.35477	4.05398	9.16564	12.2004	12.4903
1813	Hdac11	21.9932	-0.850793	0.294052	-2.89334	0.00381167	0.031492	12.6827	14.2454	13.9166	20.3085	23.5597	27.5808	32.0671	30.286	31.0805	21.9975	18.7073	17.4864
1814	Rab5a	2200.86	0.154691	0.0534826	2.89236	0.00382358	0.031573	2441.84	2354.05	2355.19	2072.74	2085.55	2085.41	2004.63	2103.31	2105.37	2371.15	2193.63	2237.43
1815	Fastkd2	1407.47	-0.352088	0.121798	-2.89075	0.00384324	0.0316729	1178.64	1122.72	1193.56	1721.15	1783.37	1676.3	1514.95	1495.5	1475.65	1255.69	1233.87	1238.21
1816	Prkag2	378.874	0.294358	0.101827	2.89077	0.00384297	0.0316729	478.56	416.678	421.592	361.746	408.71	380.002	377.872	396.852	363.507	318.048	312.331	310.592
1817	Mir27b	8.19832	-1.5386	0.532235	-2.89083	0.0038422	0.0316729	2.53653	3.56135	4.09313	10.1543	12.292	4.59679	7.8001	18.7982	8.10797	9.16564	8.94697	8.32687
1818	AC159196.3	6.87676	-1.74522	0.60374	-2.89068	0.00384414	0.0316729	2.53653	2.67101	2.45588	7.6157	6.14602	6.12906	6.06675	10.4435	2.70266	11.9153	13.0138	10.8249
1819	Yipf2	264.896	-0.244706	0.0846601	-2.89045	0.00384693	0.0316785	229.979	235.049	233.308	277.973	251.987	260.485	308.537	257.954	299.995	277.719	265.156	280.615
1820	Ly75	107.673	-0.621583	0.215073	-2.8901	0.00385114	0.0316957	76.096	88.1434	64.6714	118.043	129.066	159.355	123.935	140.987	137.835	86.157	87.843	79.9379
1821	Plekhg1	12.7499	-1.25642	0.434764	-2.8899	0.00385362	0.0316987	2.53653	12.4647	4.09313	17.77	21.5111	9.19358	13.8669	16.7095	10.8106	11.9153	14.6405	17.4864
1822	Alms1	1057.78	-0.230418	0.079784	-2.88802	0.00387675	0.0318715	1039.98	889.447	882.478	1031.93	1018.19	979.117	1175.22	1109.1	1109.44	1084.3	1220.85	1153.27
1823	Bloc1s2	770.095	0.235727	0.0816608	2.88666	0.0038936	0.0319925	827.756	859.176	914.405	804.726	787.715	775.326	745.343	705.978	739.176	783.662	677.53	620.352
1824	Syngr4	17.6962	-1.0207	0.353649	-2.88619	0.00389943	0.0320228	8.45512	8.01304	13.098	20.3085	13.3164	32.1775	25.1337	12.5322	20.2699	22.9141	21.1474	14.9884
1825	Hoxc10	85.8709	-0.525757	0.182179	-2.88593	0.00390259	0.0320312	66.7954	60.543	67.1273	69.8106	77.8496	76.6132	101.401	77.2816	118.917	92.573	103.297	118.242
1826	Zcchc6	1866.05	-0.216939	0.0751819	-2.88551	0.00390775	0.0320559	1744.29	1619.52	1624.15	2006.74	1888.88	1953.64	2056.63	2131.51	2085.1	1718.56	1763.37	1800.27
1827	Rnaseh2a	831.799	-0.16878	0.0585	-2.88513	0.00391252	0.0320775	707.693	770.142	804.709	846.612	818.445	862.665	920.412	809.368	889.174	850.572	849.962	851.838
1828	Ptp4a1	1620.15	-0.341719	0.118456	-2.88476	0.00391708	0.0320973	1424.69	1299	1322.9	1893.77	1894	1861.7	1885.03	1775.39	1825.64	1340.02	1391.66	1527.98
1829	Rilpl1	24.9605	-1.18522	0.410904	-2.88442	0.00392129	0.0321143	13.5282	11.5744	13.098	40.6171	20.4867	39.8389	21.667	9.39912	18.9186	49.4945	30.0944	30.8094
1830	Nsd3	2398.61	-0.145845	0.0506135	-2.88155	0.00395724	0.032391	2346.29	2162.63	2155.44	2404.02	2414.36	2450.09	2574.9	2586.85	2485.09	2252.91	2505.15	2445.6
1831	Ccng1	5185	0.318077	0.110397	2.88122	0.00396142	0.0324075	6131.65	5971.49	6158.52	5450.31	5717.84	5421.15	5006.8	4972.13	5035.05	4209.78	4136.75	4008.55
1832	Cd82	1073.42	0.199295	0.0691812	2.88076	0.00396715	0.032419	1175.26	1210.86	1176.36	1071.28	926	1089.44	1135.35	1035.99	1074.31	1074.21	940.245	971.745
1833	2210013O21Rik	148.289	0.689422	0.239311	2.88086	0.00396588	0.032419	206.305	201.216	216.936	78.6956	112.677	88.8713	114.402	104.435	121.62	183.313	156.979	194.016
1834	Ndst2	1201.68	0.149754	0.0519904	2.88041	0.00397154	0.0324371	1262.35	1261.61	1367.1	1127.12	1124.72	1178.31	1211.62	1114.32	1270.25	1148.45	1180.19	1174.09
1835	Dst	2421.31	-0.633584	0.220088	-2.87878	0.00399217	0.0325879	1788.26	1602.61	1748.58	2614.72	2558.79	2764.2	1819.16	1866.25	1767.54	3144.73	3648.74	3732.1
1836	Rnf8	468.638	0.282897	0.0982927	2.8781	0.00400074	0.0326045	563.111	513.725	549.298	422.672	401.54	387.663	410.806	445.936	432.425	456.449	525.431	514.6
1837	Myo1f	3555.89	-0.496664	0.17256	-2.87821	0.00399945	0.0326045	2708.17	2687.04	2757.13	4682.39	4515.27	4864.94	3926.05	3802.47	4158.04	2738.69	2803.66	3026.82
1838	Gm25894	29.4827	0.618118	0.214749	2.87833	0.00399789	0.0326045	35.5115	41.8459	43.3871	34.2707	24.5841	19.9194	23.4003	26.1087	16.2159	29.3301	30.9077	28.3113
1839	Mecr	365.186	0.189042	0.0656944	2.87759	0.00400723	0.0326268	384.708	398.871	422.411	366.823	354.42	346.292	354.471	354.033	355.399	340.045	337.545	367.215
1840	Acaa2	394.03	0.19419	0.0674846	2.87754	0.00400784	0.0326268	407.537	455.853	441.239	350.322	368.761	395.324	373.538	396.852	398.642	389.54	364.386	386.367
1841	Cbx3-ps6	137.531	-0.339354	0.117967	-2.87669	0.00401874	0.0326978	105.689	119.305	119.519	158.66	169.015	142.501	141.269	138.898	124.322	140.234	160.232	130.732
1842	Prkab2	204.084	0.408283	0.141998	2.87528	0.00403672	0.0328263	261.263	268.882	222.666	158.66	152.626	165.485	167.269	244.377	193.24	189.729	204.154	220.662
1843	Tnfrsf1a	2926.24	-0.325552	0.113253	-2.87456	0.00404596	0.0328836	2500.18	2467.13	2409.21	3067.86	2931.65	3105.9	3668.65	3511.09	3537.78	2619.54	2630.41	2665.43
1844	F13a1	651.052	-2.63694	0.917764	-2.87322	0.00406306	0.0330047	139.509	143.344	114.608	134.544	91.1659	88.8713	604.941	360.3	595.936	1883.54	1666.58	1989.29
1845	Snx1	3336.43	0.12143	0.0423032	2.87048	0.00409852	0.0332747	3497.88	3597.85	3559.38	3126.25	3246.12	3351.06	3235.31	3099.62	3275.62	3525.11	3235.55	3287.45
1846	Snhg17	660.254	0.429461	0.149777	2.86734	0.00413939	0.0335882	813.382	844.04	800.616	516.599	492.706	547.018	553.807	616.164	493.235	711.254	753.172	781.06
1847	Atp5g1	1013.3	0.178481	0.0622754	2.86599	0.00415707	0.0337135	1018	1120.93	1191.1	991.311	987.46	945.407	1055.61	931.557	1036.47	997.222	936.992	947.597
1848	Decr1	324.163	-0.860629	0.300308	-2.86582	0.00415936	0.0337137	187.704	201.216	213.661	408.709	484.511	429.034	435.939	436.537	504.045	211.726	189.513	187.355
1849	CT030161.2	10.042	0.961953	0.335716	2.86538	0.00416512	0.0337422	11.8372	19.5874	16.3725	6.34642	9.21903	6.12906	9.53346	7.31043	9.4593	8.24908	8.13361	8.32687
1850	Rnf141	1617.73	-0.242229	0.08456	-2.86458	0.00417564	0.0338092	1499.94	1354.2	1411.31	1723.69	1741.37	1708.47	1819.16	1827.61	1816.19	1476.58	1441.28	1592.93
1851	Inpp5f	493.268	-0.182766	0.0638206	-2.86375	0.00418654	0.0338791	468.413	445.169	428.96	522.945	501.925	524.034	525.207	529.484	501.343	475.697	519.738	476.297
1852	Hrh1	13.3341	-1.10834	0.387058	-2.86351	0.00418979	0.0338871	4.22756	7.1227	9.8235	12.6928	15.365	19.9194	13.8669	21.9313	14.8646	15.5816	15.4539	9.15955
1853	Rnpep	7283.98	0.172789	0.0603631	2.8625	0.00420316	0.0339769	7998.54	7942.7	7925.11	7611.9	7411.07	7506.56	7144.9	6976.23	7287.71	6388.45	6523.15	6691.47
1854	Nudt1	147.452	-0.424347	0.148381	-2.85986	0.00423833	0.0342427	93.0063	114.854	143.259	168.815	175.161	156.291	181.136	157.696	166.213	153.066	135.018	124.903
1855	Il18	96.0205	-0.433309	0.151541	-2.85935	0.00424514	0.0342792	86.2422	66.7753	76.1322	87.5806	110.628	91.9358	85.8012	102.346	97.2956	105.405	113.871	128.234
1856	Aph1c	288.829	-0.486113	0.170095	-2.85789	0.00426465	0.0343997	203.768	227.036	233.308	356.669	384.126	430.566	254.803	289.284	313.508	267.637	253.769	251.471
1857	Ppp1r3f	15.5751	-1.0796	0.377748	-2.85798	0.00426346	0.0343997	7.6096	6.23236	11.4608	10.1543	20.4867	21.4517	26.0003	24.02	17.5673	15.5816	13.0138	13.323
1858	Itgb2	5653.65	-0.300263	0.105115	-2.85653	0.00428297	0.0345289	4676.52	4980.55	4797.96	5596.27	5653.31	5755.18	5352.61	4967.96	5563.42	7111.62	6463.78	6924.62
1859	Timm50	1186.03	0.174423	0.0610686	2.85618	0.00428776	0.0345489	1196.4	1323.04	1367.1	1166.47	1193.35	1239.6	1204.68	1114.32	1148.63	1096.21	1116.74	1065.84
1860	4933440N22Rik	64.7248	-0.532581	0.186561	-2.85473	0.00430738	0.0346538	35.5115	54.3106	56.4851	77.4263	70.6792	49.0325	69.3343	67.8825	68.9177	69.6589	66.6956	90.7628
1861	Smagp	203.354	-0.386725	0.135469	-2.8547	0.00430772	0.0346538	191.086	155.809	148.99	192.931	226.378	196.13	253.07	230.801	249.996	173.231	189.513	232.32
1862	Gm16386	9.14851	1.04882	0.367391	2.85479	0.00430657	0.0346538	16.0647	14.2454	14.7353	2.53857	8.19469	4.59679	7.8001	10.4435	10.8106	5.49939	5.69353	9.15955
1863	Tlr3	554.817	-0.410719	0.143958	-2.85306	0.00433011	0.0348152	473.486	430.033	428.96	651.143	675.038	724.761	573.741	617.209	637.827	411.537	531.125	502.943
1864	Phb2	5778.45	-0.16993	0.0595669	-2.85275	0.00433428	0.03483	5038.4	5366.06	5447.13	5941.52	6153.19	5922.2	5392.47	5606.05	5626.93	6144.65	6336.08	6366.72
1865	Prmt1	3150.63	0.117089	0.0410513	2.85227	0.00434088	0.0348644	3230.7	3379.72	3426.77	3105.94	3235.88	3030.82	2980.51	3199.88	3085.08	3171.31	2954.94	3006
1866	Azin2	176.053	-0.896507	0.314371	-2.85175	0.00434799	0.0349027	89.6242	116.634	115.426	152.314	129.066	127.178	151.669	152.475	147.295	314.382	299.317	317.254
1867	Masp1	71.2247	-0.636987	0.223476	-2.85035	0.00436705	0.0350357	47.3486	47.1879	56.4851	77.4263	118.823	84.2745	72.801	50.1286	55.4045	83.4073	75.6426	85.7667
1868	Zadh2	644.745	-0.418601	0.146868	-2.8502	0.00436922	0.0350357	537.745	520.847	485.445	628.296	708.841	612.906	853.678	843.832	820.256	606.766	559.592	558.733
1869	Cyp20a1	1037.95	-0.257787	0.0905029	-2.84838	0.00439424	0.03521	870.031	923.28	918.498	1113.16	1144.18	1166.05	1048.68	1129.98	1241.87	906.482	956.513	1036.69
1870	Pla2g4c	11.9671	0.889996	0.312468	2.84828	0.00439567	0.03521	20.2923	19.5874	15.5539	10.1543	9.21903	6.12906	13.0002	8.35477	9.4593	13.7485	8.94697	9.15955
1871	Bcl6b	91.5388	0.948319	0.332974	2.84803	0.00439913	0.0352189	147.965	142.454	138.348	97.7349	117.799	124.113	39.8672	33.4191	47.2965	76.9914	66.6956	65.7822
1872	Nfatc2	2988.22	0.213356	0.0749285	2.84746	0.00440689	0.0352622	3387.96	3419.79	3193.46	2736.58	2678.64	2500.66	2864.37	2893.88	2851.3	2922.01	3153.4	3256.64
1873	Os9	2288.06	-0.288055	0.101199	-2.84643	0.00442129	0.0353488	1904.09	2000.59	1981.89	2409.1	2451.24	2381.14	2751.7	2634.89	2716.17	2054.02	2134.26	2037.58
1874	Bloc1s5	623.283	-0.241675	0.0849072	-2.84634	0.00442244	0.0353488	556.347	504.821	580.405	684.144	713.962	707.906	593.675	585.878	663.502	681.007	580.74	627.013
1875	ENSMUSG00000116544.1	8.60023	1.17431	0.413079	2.84283	0.00447155	0.0357223	18.6013	9.79371	16.3725	8.88499	6.14602	4.59679	8.66678	3.13304	4.05398	6.41595	4.88017	11.6576
1876	Fam35a	179.945	-0.313119	0.110168	-2.84219	0.00448043	0.0357742	153.883	163.822	139.166	215.778	214.086	179.275	206.269	177.539	182.429	164.065	176.499	186.522
1877	Thrap3	6285.06	-0.178671	0.0628851	-2.84122	0.00449407	0.0358258	5943.95	5644.74	5566.65	6816.05	6991.09	6711.32	6711.56	6669.2	6433.67	5799.1	6119.73	6013.66
1878	Mafa	52.8468	-0.740469	0.260603	-2.84136	0.0044921	0.0358258	26.2109	47.1879	32.745	44.4249	31.7544	52.097	57.2008	58.4834	66.2151	69.6589	71.5758	76.6072
1879	Mbtps2	1495.56	0.653244	0.229905	2.84136	0.00449218	0.0358258	2099.41	2067.36	2008.09	1045.89	1034.58	1078.71	1010.55	1014.06	1008.09	1826.71	1878.05	1875.21
1880	Prep	2700.49	0.200669	0.0706533	2.84019	0.00450863	0.0359227	2969.44	2959.48	3040.37	2761.96	2788.24	2845.41	2540.23	2575.36	2760.76	2298.74	2501.08	2364.83
1881	Cpt1b	22.0802	-0.849004	0.299038	-2.83912	0.00452381	0.0360245	11.8372	16.9164	13.098	17.77	31.7544	19.9194	24.267	36.5521	18.9186	23.8307	29.281	20.8172
1882	Asb1	561.919	-0.270311	0.095238	-2.83827	0.00453584	0.0360818	521.681	473.66	462.523	656.22	586.945	592.986	645.675	598.411	627.016	575.602	501.03	501.277
1883	Agk	578.443	-0.267613	0.0942854	-2.83833	0.00453501	0.0360818	519.144	482.563	501.817	567.37	592.066	637.422	695.943	662.116	655.394	541.689	527.058	558.733
1884	Tomm6os	10.5364	0.96479	0.339942	2.8381	0.00453823	0.0360818	19.4468	17.8068	13.098	6.34642	6.14602	7.66132	8.66678	9.39912	8.10797	10.0822	13.0138	6.66149
1885	Atp6v0b	2209.97	0.178087	0.0627608	2.83755	0.00454618	0.0361258	2268.51	2523.22	2473.89	1992.78	1993.36	2016.46	2223.03	2174.33	2226.99	2357.4	2080.58	2189.13
1886	Nr6a1	76.8048	0.4095	0.144336	2.83712	0.0045522	0.0361545	88.7787	99.7178	94.9605	53.3099	69.6549	62.8228	74.5343	74.1486	85.1337	86.157	68.3223	64.1169
1887	Gorasp1	358.561	-0.274323	0.0967137	-2.83644	0.00456192	0.0361933	299.311	320.522	306.985	383.324	366.712	384.598	377.872	396.852	456.749	340.045	338.358	331.409
1888	Zfp760	128.417	0.377507	0.133085	2.83658	0.00455996	0.0361933	162.338	148.686	155.539	107.889	101.409	102.662	106.601	156.652	125.674	118.237	118.751	136.561
1889	Vav1	4772.63	0.24942	0.087947	2.83603	0.00456786	0.0362213	5559.24	5279.7	5418.48	4283.83	4221.29	4322.52	4297.86	4197.23	4232.36	4938.45	5240.48	5280.07
1890	Prkch	1383.98	0.236391	0.0833708	2.83541	0.00457664	0.0362717	1623.38	1519.81	1537.38	1327.67	1413.58	1334.6	1436.95	1498.64	1352.68	1225.45	1145.21	1192.41
1891	Ppbp	33.1133	0.751254	0.265068	2.83419	0.00459422	0.0363725	47.3486	49.8589	46.6616	26.655	18.4381	12.2581	22.5336	34.4634	37.8372	25.6638	40.668	34.9728
1892	Pop4	360.629	-0.352658	0.124426	-2.83428	0.00459286	0.0363725	284.092	264.43	344.641	435.364	410.759	453.55	400.405	366.566	375.669	330.88	348.932	312.258
1893	Zdhhc13	969.471	0.172549	0.0608857	2.83398	0.00459729	0.0363776	1046.74	1090.66	1038.02	1010.35	1045.85	930.084	947.279	931.557	913.498	899.149	903.644	876.819
1894	B230354K17Rik	417.677	0.30892	0.109029	2.83338	0.00460586	0.0364262	543.664	449.62	473.984	357.938	324.715	381.534	380.472	399.985	370.264	417.037	443.282	469.635
1895	Cycs	4223.7	-0.27341	0.0965408	-2.83207	0.00462476	0.0365563	3575.67	3580.05	3797.6	4901.97	5205.68	4792.92	4190.39	4357.01	4444.52	4187.78	3992.79	3657.99
1896	Ccni	5012.79	-0.0963011	0.0340133	-2.83128	0.00463619	0.0366189	4937.79	4763.31	4599.86	4976.86	4928.08	5025.83	5180.14	5108.94	5214.78	5104.35	5051.78	5261.75
1897	Trpm4	178.408	-0.350988	0.123972	-2.83119	0.00463756	0.0366189	145.428	161.151	139.985	172.623	178.235	153.226	205.403	198.426	160.808	207.144	191.14	227.323
1898	Map3k13	54.9038	-0.681167	0.240648	-2.83055	0.00464676	0.0366722	42.2756	37.3942	32.745	67.272	85.0199	90.4036	46.8006	46.9956	56.7558	50.411	55.3085	47.4631
1899	Trmt2b	511.953	-0.186908	0.0660466	-2.82994	0.00465563	0.0367228	483.633	444.278	462.523	568.639	540.85	513.308	516.54	511.73	522.964	571.936	512.417	494.616
1900	Ipp	273.281	-0.317416	0.112174	-2.82968	0.0046594	0.0367333	214.76	242.172	237.401	272.896	331.885	272.743	268.67	263.175	229.726	317.131	309.891	318.919
1901	Fmo5	157.239	-0.37294	0.131857	-2.82837	0.00467858	0.0368457	137.818	118.415	130.161	137.083	178.235	168.549	208.003	159.785	174.321	170.481	136.645	167.37
1902	Slc46a3	84.1329	-0.565957	0.200096	-2.82843	0.00467762	0.0368457	55.8038	58.7623	69.5832	102.812	77.8496	104.194	105.735	99.2129	122.971	66.9092	68.3223	77.4399
1903	Flna	80211.6	0.325406	0.115059	2.82817	0.00468156	0.0368498	93248.1	95195.8	95141.5	67047.4	66584.9	68651.6	69094.2	68187.5	71286.6	88014	88097.6	91990.2
1904	Ntng2	8.88082	-3.00024	1.0611	-2.82749	0.00469145	0.0369082	0	1.78068	2.45588	12.6928	7.17035	7.66132	23.4003	28.1974	18.9186	1.83313	1.62672	0.832687
1905	Fbxl4	258.95	-0.283958	0.100439	-2.82718	0.00469598	0.0369244	212.223	249.295	208.749	257.665	234.573	263.549	292.937	248.554	259.455	296.05	288.743	295.604
1906	Sh3pxd2a	1487.98	-0.324339	0.114744	-2.82663	0.00470404	0.0369684	1321.53	1313.25	1118.24	1589.14	1539.58	1516.94	1781.89	1764.95	1848.62	1315.27	1326.59	1419.73
1907	Imp4	2270.04	-0.295985	0.104737	-2.82598	0.00471369	0.0370054	1892.25	1893.75	2027.73	2557.61	2570.06	2587.99	2581.83	2497.03	2583.74	2002.69	2078.14	1967.64
1908	Gm10443	420.142	0.401138	0.141938	2.82614	0.00471129	0.0370054	496.315	503.931	544.386	343.976	375.931	321.775	376.138	344.634	314.859	489.445	447.349	482.958
1909	Ssr3	11709.8	0.141628	0.0501318	2.82512	0.00472633	0.0370852	12755.4	12649.9	12366.2	11772.6	11847.5	12020.6	11630	11584.9	11814.7	10622.1	10831.5	10621.8
1910	BC147527	12.4016	-1.09926	0.389267	-2.82391	0.00474411	0.0372053	6.76409	7.1227	6.549	10.1543	19.4624	10.7258	12.1335	11.4878	10.8106	17.4147	18.7073	17.4864
1911	Hemk1	186.276	-0.257184	0.0910931	-2.82331	0.00475307	0.037256	154.729	164.712	167	201.816	197.697	199.194	200.203	201.559	191.889	194.312	175.686	186.522
1912	AC153525.1	39.5164	0.576095	0.204152	2.8219	0.00477403	0.0374008	67.6409	42.7362	45.843	38.0785	32.7788	42.9034	26.0003	31.3304	40.5398	34.8294	39.0413	32.4748
1913	Atrn	3245.91	0.200758	0.0711599	2.82123	0.004784	0.0374418	3705.88	3475.88	3609.32	2965.05	2719.61	3007.83	3149.51	3068.29	3285.08	3307.88	3116.8	3539.75
1914	Gm23455	101.204	0.506699	0.179603	2.82121	0.00478427	0.0374418	135.282	139.783	117.063	78.6956	68.6305	87.3391	78.8677	115.922	68.9177	99.9055	103.297	120.74
1915	Ptpro	963.279	-0.21408	0.075916	-2.81996	0.00480293	0.0375682	887.787	860.956	828.449	1029.39	1049.94	1015.89	1035.68	972.287	1108.09	979.807	842.642	948.43
1916	Entpd5	851.949	0.307132	0.108943	2.81921	0.00481426	0.0376372	979.948	1018.55	989.718	761.57	681.184	741.616	772.21	707.023	783.77	927.563	875.176	985.068
1917	1700025G04Rik	2197.56	0.273409	0.0970159	2.81818	0.00482963	0.0377376	2637.15	2442.2	2497.63	1968.66	1967.75	1890.81	1972.56	1823.43	2020.24	2413.31	2283.1	2453.93
1918	Tada2a	387.809	0.213515	0.0757878	2.81728	0.00484324	0.0377934	448.967	430.923	415.043	396.017	401.54	410.647	365.738	364.477	348.643	346.461	386.346	338.903
1919	Cd180	3453.66	-0.286246	0.101606	-2.81721	0.00484434	0.0377934	2941.53	3014.68	2938.05	3974.13	4168.02	3919.53	3685.98	3746.07	3639.13	2841.35	3307.13	3268.3
1920	Oxsm	182.502	-0.397154	0.14097	-2.8173	0.00484296	0.0377934	139.509	143.344	157.995	244.972	202.819	193.065	215.803	197.381	209.456	146.65	169.992	169.035
1921	Tomm6	1924.34	0.395132	0.140267	2.81701	0.00484731	0.0377969	2333.61	2297.96	2409.21	1625.95	1649.18	1546.05	1566.95	1539.37	1533.76	2294.16	2173.3	2122.52
1922	Trnt1	2080.6	-0.282841	0.10042	-2.81658	0.00485382	0.037828	1801.79	1739.72	1824.72	2364.68	2400.02	2522.11	2224.76	2296.52	2152.67	1860.63	1925.23	1854.39
1923	Bcl2l2	603.277	-0.202051	0.071791	-2.81443	0.0048864	0.0380621	515.762	553.79	558.302	633.373	603.334	562.341	655.209	657.938	628.368	681.924	564.473	624.515
1924	Tle6	13.4747	-1.2265	0.435853	-2.81403	0.00489247	0.0380697	9.30063	6.23236	4.91175	16.5007	9.21903	13.7904	14.7335	10.4435	9.4593	28.4135	18.7073	19.9845
1925	Hacd2	562.667	0.190715	0.0677703	2.81414	0.00489084	0.0380697	637.516	642.824	577.949	543.254	545.971	592.986	476.673	538.883	552.693	539.856	557.152	546.242
1926	Ube2f	1323.31	0.230002	0.0817498	2.81348	0.00490083	0.0380764	1533.76	1444.13	1485.8	1309.9	1294.76	1362.18	1146.62	1157.14	1093.22	1395.93	1263.15	1393.08
1927	Gm13192	59.3034	0.654966	0.232799	2.81344	0.00490144	0.0380764	75.2505	86.3627	84.3184	35.5399	39.9491	52.097	42.4672	39.6852	51.3505	84.3239	53.6818	66.6149
1928	Dhx33	1451.38	0.177694	0.0631578	2.81349	0.00490075	0.0380764	1620	1549.19	1594.68	1472.37	1374.66	1472.51	1501.09	1455.82	1470.25	1251.11	1320.9	1333.96
1929	Gga3	955.028	0.166711	0.059258	2.81331	0.00490349	0.0380764	1051.82	1049.71	1017.55	948.155	864.54	916.294	922.146	1049.57	936.47	915.648	883.31	905.13
1930	Adipor2	3791.58	-0.143946	0.0511856	-2.81223	0.00491991	0.0381646	3519.02	3463.41	3565.93	3712.66	3740.88	3619.21	3877.52	3747.12	4101.28	4146.54	3894.37	4110.97
1931	Zfp518a	954.177	-0.290471	0.103289	-2.81223	0.00491994	0.0381646	885.251	782.607	780.969	1083.97	1079.65	1140	1000.15	988.996	1101.33	825.824	900.391	880.983
1932	Ifi44	369.963	-0.570766	0.202982	-2.8119	0.00492493	0.0381835	274.791	271.553	266.053	558.485	551.093	527.099	322.404	332.102	343.237	326.297	338.358	328.079
1933	Tmem67	135.838	-0.325993	0.115971	-2.81098	0.00493909	0.0382537	119.217	111.292	113.789	124.39	156.723	134.839	143.002	133.676	127.025	158.566	163.486	144.055
1934	Rbm15b	1145.35	0.168289	0.0598667	2.81107	0.00493775	0.0382537	1273.34	1231.34	1245.95	1151.24	1058.14	1022.02	1129.28	1042.26	1054.04	1180.53	1175.31	1180.75
1935	Zfp518b	172.228	-0.61437	0.218727	-2.80884	0.00497205	0.0384891	110.762	133.551	124.431	285.589	246.865	226.775	148.202	149.342	149.997	136.568	178.126	176.53
1936	Tnfrsf11a	2472.73	0.374648	0.133402	2.80842	0.00497851	0.0385151	3038.77	2945.24	2967.52	2534.76	2450.21	2433.24	2638.17	2587.89	2543.2	1680.98	1896.76	1955.98
1937	Vps9d1	264.215	-0.253919	0.0904236	-2.80811	0.00498337	0.0385151	236.743	226.146	230.034	280.512	255.06	249.759	305.071	304.949	293.238	251.139	279.796	258.133
1938	0610010F05Rik	955.289	0.184179	0.0655917	2.80796	0.0049857	0.0385151	1052.66	1083.54	1011	1009.08	1033.56	904.036	933.413	895.005	916.2	894.567	872.736	857.667
1939	Smg8	1048.44	0.191704	0.0682672	2.80814	0.00498278	0.0385151	1165.11	1098.68	1208.29	976.079	985.411	971.455	973.28	1014.06	985.118	971.558	1057.37	1174.92
1940	Slc25a3	8175.37	0.115944	0.041301	2.80729	0.00499595	0.0385744	8841.51	8319.31	8873.08	8065.03	8241.81	8143.98	7649.3	7576.73	7774.19	8102.43	8172.65	8344.35
1941	Rbmx	865.618	-0.430508	0.153368	-2.80703	0.00500006	0.0385863	666.263	682.889	708.93	1037	1036.63	1020.49	1048.68	1055.83	1002.69	663.592	747.479	716.943
1942	A430093F15Rik	50.6317	-0.859265	0.306137	-2.8068	0.00500365	0.0385941	27.9019	28.4908	37.6568	59.6563	66.5819	87.3391	35.5338	33.4191	33.7832	66.9092	52.8685	77.4399
1943	Mir3091	73.027	0.679306	0.242116	2.8057	0.00502069	0.0387055	88.7787	104.169	113.789	46.9635	40.9734	52.097	60.6675	52.2173	55.4045	100.822	81.3361	79.1052
1944	Erbin	6673.81	-0.382699	0.136418	-2.80534	0.0050264	0.0387296	5759.62	5330.45	5214.64	7524.31	7706.08	7388.58	8099.98	8024.76	8041.75	5214.33	5660.18	6121.08
1945	Tmem181b-ps	402.037	0.373633	0.133233	2.80436	0.00504169	0.0388275	546.2	461.195	450.244	345.245	356.469	353.953	349.271	296.594	333.778	446.367	421.321	463.806
1946	Snapc4	601.686	0.152707	0.0544813	2.80292	0.0050642	0.0389795	647.662	664.192	639.346	569.908	566.458	619.035	575.474	624.519	568.909	572.853	583.993	587.877
1947	Ublcp1	177.876	-0.376835	0.134451	-2.80277	0.00506663	0.0389795	139.509	138.893	156.357	187.854	207.94	249.759	171.602	169.184	148.646	205.31	186.26	173.199
1948	Gm21981	1938.33	0.395118	0.140986	2.80253	0.00507038	0.0389883	2352.21	2315.77	2423.95	1633.57	1656.35	1550.65	1578.22	1559.21	1541.87	2307.91	2197.7	2142.5
1949	Gnpda1	1638.76	0.153478	0.0547943	2.80098	0.0050947	0.0391552	1778.11	1779.78	1760.86	1591.68	1593.87	1683.96	1501.09	1452.69	1535.11	1710.31	1637.3	1640.39
1950	Eif4e2	2587.62	0.133595	0.0477	2.80073	0.00509868	0.0391657	2799.49	2648.75	2859.46	2527.14	2702.2	2661.54	2449.23	2447.95	2594.55	2501.3	2440.08	2419.79
1951	Chic1	15.9316	-1.16323	0.415646	-2.7986	0.00513251	0.0394054	6.76409	11.5744	6.549	15.2314	18.4381	13.7904	25.1337	35.5078	18.9186	13.7485	12.2004	13.323
1952	Gm38973	19.3407	-0.806706	0.28835	-2.79766	0.00514744	0.0394997	9.30063	10.6841	17.1911	19.0393	21.5111	19.9194	19.9336	20.8869	22.9726	22.9141	23.5875	24.1479
1953	Alkbh4	91.1758	-0.422593	0.151067	-2.79739	0.00515169	0.0395121	62.5679	77.4594	76.1322	118.043	88.0929	105.726	85.8012	92.9468	118.917	91.6564	95.1632	81.6033
1954	Orc2	2530.94	-0.262963	0.0940228	-2.7968	0.00516121	0.0395649	2211.01	2168.86	2220.11	2774.65	3044.33	2758.08	2731.77	2801.98	2781.03	2326.24	2274.97	2278.23
1955	Tex30	929.071	-0.200973	0.0718938	-2.79541	0.00518338	0.0397145	831.983	823.562	850.552	1076.35	1001.8	927.02	858.012	897.094	910.795	1024.72	940.245	1006.72
1956	Rap1gds1	3754.6	0.177544	0.0635411	2.79416	0.00520344	0.0398275	4352.69	3902.35	4076.75	3776.12	3753.17	3674.37	3910.45	3738.76	3751.29	3226.31	3471.42	3421.51
1957	Rnf34	518.364	0.176002	0.0629873	2.79425	0.00520203	0.0398275	558.883	581.39	563.214	529.291	502.949	453.55	531.274	493.976	505.397	535.274	487.203	477.962
1958	Npc2	10385.7	0.164206	0.0588133	2.79199	0.00523854	0.0400756	11192.9	10951.2	11742.4	10508.4	10318.1	10181.9	10598.6	10198	10828.2	9368.2	9121.84	9619.2
1959	Tmem131l	977.033	0.273696	0.0980481	2.79144	0.00524736	0.0401226	1146.51	1136.96	1081.4	1005.27	1029.46	971.455	1021.81	986.907	943.227	780.913	803.601	816.866
1960	Atp6v1h	3190.98	-0.243808	0.0873523	-2.79109	0.00525316	0.0401465	2747.07	2780.52	2880.74	3481.65	3781.85	3484.37	3440.71	3373.24	3495.89	3135.57	2858.96	2831.13
1961	Nup85	1843.16	0.117676	0.0421912	2.78911	0.00528523	0.040371	1855.05	2022.85	2000.72	1785.88	1801.81	1803.47	1820.89	1818.21	1725.65	1764.39	1883.74	1835.24
1962	Tmem238	56.6938	-0.469842	0.168485	-2.78863	0.00529314	0.0404108	45.6576	46.2976	40.1126	53.3099	63.5088	65.8874	61.5342	68.9269	55.4045	68.7423	61.8154	49.1285
1963	Xaf1	138.692	-0.562401	0.201762	-2.78745	0.00531253	0.0405382	95.5428	110.402	99.0537	186.585	187.454	203.791	124.802	157.696	151.349	99.9055	122.818	124.903
1964	Fam171a1	113.08	-0.398019	0.14291	-2.7851	0.00535112	0.0408118	81.1691	94.3758	98.235	114.236	151.602	108.791	119.602	126.366	133.781	94.4061	122.818	111.58
1965	Mydgf	1822.4	0.262799	0.094423	2.78321	0.00538238	0.0410294	1889.72	2205.37	2155.44	1576.45	1635.86	1671.7	1613.76	1606.2	1664.84	2101.68	1900.01	1847.73
1966	Gm21817	14.1109	0.893557	0.321295	2.78111	0.00541727	0.0412743	20.2923	30.2715	14.7353	7.6157	14.3407	6.12906	10.4001	13.5765	16.2159	11.9153	13.0138	10.8249
1967	Ptpn7	4076.25	-0.339027	0.121973	-2.77954	0.00544367	0.0414543	3160.52	3397.53	3641.25	4549.11	4692.48	4765.34	4667.06	4595.12	4867.48	3499.44	3497.45	3582.22
1968	Neu3	68.6135	-0.451082	0.162353	-2.77841	0.00546258	0.0415773	60.0313	58.7623	44.2058	68.5413	83.9956	61.2906	75.401	79.3703	58.1071	71.492	78.896	83.2687
1969	Cd200r4	16.3362	-1.23657	0.445118	-2.77807	0.00546826	0.0415994	7.6096	8.01304	8.18625	21.5778	26.6327	33.7098	19.9336	17.7539	21.6213	12.8319	6.50689	11.6576
1970	Hes6	236.902	-0.396156	0.142627	-2.77757	0.00547669	0.0416423	151.347	207.449	214.48	272.896	238.67	246.695	267.804	278.84	298.644	259.388	199.273	207.339
1971	D17H6S53E	390.795	0.24047	0.0866109	2.77644	0.00549575	0.041766	420.219	458.524	449.425	363.015	309.35	341.695	389.139	374.92	372.967	401.455	408.307	400.522
1972	Abcb1b	1865.37	0.324054	0.116857	2.7731	0.00555257	0.0421764	2246.52	2135.03	2205.38	2002.93	2105.01	2070.09	1735.96	1639.62	1690.51	1429.84	1573.04	1550.46
1973	Gm44260	19.1965	-1.01417	0.365814	-2.77236	0.00556516	0.0422506	10.9917	10.6841	11.4608	11.4236	17.4137	19.9194	18.2002	22.9756	16.2159	21.9975	36.6012	32.4748
1974	BC037034	436.216	0.315411	0.113854	2.77031	0.00560027	0.0424742	553.81	504.821	477.259	360.477	321.642	370.808	453.273	479.355	460.803	424.369	408.307	419.674
1975	Jagn1	815.46	-0.217878	0.078645	-2.7704	0.00559867	0.0424742	704.311	730.967	740.856	921.5	893.221	881.052	840.678	880.384	899.985	734.168	752.359	806.041
1976	Dlx1	68.896	-0.483685	0.174665	-2.76921	0.00561922	0.0425963	54.9583	56.0913	47.4803	77.4263	98.3363	76.6132	79.7344	66.8382	81.0797	61.4098	61.0021	65.7822
1977	Jazf1	252.38	-0.57222	0.206652	-2.769	0.00562289	0.0425981	190.24	189.642	173.549	304.628	298.082	318.711	323.271	309.127	347.291	168.648	216.354	189.02
1978	Pcdhga1	146.928	-0.379896	0.137203	-2.76887	0.00562515	0.0425981	116.681	116.634	124.431	170.084	162.869	174.678	177.669	166.051	167.565	127.402	135.831	123.238
1979	Emc6	966.787	0.171463	0.0619581	2.76741	0.00565041	0.0427462	1018	1071.08	1078.95	924.039	984.387	893.31	924.746	964.976	909.444	1046.72	923.978	861.831
1980	ENSMUSG00000115230.1	266.287	-0.536856	0.193982	-2.76756	0.00564775	0.0427462	196.159	214.571	187.465	269.088	288.863	274.275	223.603	204.692	222.969	363.876	366.012	383.869
1981	Tjp2	1096.89	-1.00249	0.362472	-2.7657	0.00568001	0.0429485	606.232	651.727	619.699	1450.79	1398.22	1627.26	631.809	616.164	666.205	1609.49	1538.07	1746.98
1982	Gbf1	2168.03	-0.18528	0.0670037	-2.76521	0.00568857	0.0429915	1949.75	1972.99	1973.71	2247.9	2267.88	2247.83	2484.77	2373.8	2301.31	1963.28	2110.67	2122.52
1983	Rac2	10730.1	-0.137581	0.0497767	-2.76396	0.00571038	0.0431345	9898.4	9799.06	10238.5	11683.8	11272.8	11398.5	11028.5	10610.6	11590.3	10324.2	10380.1	10536
1984	Rtn4rl1	27.0053	-1.26649	0.458258	-2.7637	0.00571509	0.0431484	12.6827	14.2454	12.2794	36.8092	20.4867	27.5808	52.8674	41.7739	58.1071	19.2478	13.8271	14.1557
1985	Vma21	5371.45	0.20351	0.0736642	2.76268	0.00573296	0.0432615	6278.77	6144.22	5455.32	5065.71	4736.53	4958.41	5558.87	5686.47	5676.93	4809.21	4947.67	5139.34
1986	Tnfsfm13	209.687	-0.403502	0.146067	-2.76245	0.005737	0.0432701	147.965	190.532	167	271.627	246.865	225.243	257.403	227.668	229.726	187.896	191.953	172.366
1987	Mrps34	1330.07	0.305353	0.11055	2.76212	0.00574271	0.0432914	1460.2	1556.31	1642.98	1209.63	1171.84	1205.89	1150.08	1105.96	1074.31	1494.92	1429.08	1459.7
1988	Taf4	1081.16	0.412563	0.149407	2.76133	0.00575664	0.0433746	1358.74	1350.64	1281.15	849.151	808.201	851.939	955.946	875.162	920.254	1212.61	1281.04	1229.05
1989	H6pd	793.443	-0.221985	0.0804134	-2.76055	0.00577048	0.0434342	655.271	682.889	773.601	874.537	866.588	937.746	774.81	770.728	854.039	768.081	767.813	795.216
1990	Slc25a13	2690.82	0.207541	0.075179	2.76063	0.00576901	0.0434342	3020.17	3004	2951.96	2615.99	2497.33	2615.57	2346.1	2276.68	2487.8	2817.52	2757.29	2899.42
1991	Tbc1d9	292.098	0.398712	0.14444	2.76039	0.00577325	0.0434342	300.157	359.696	406.857	304.628	289.887	327.905	245.27	288.24	297.292	202.561	222.048	260.631
1992	Tnfsf13	50.8132	-0.522019	0.189162	-2.75964	0.00578653	0.0435123	37.2025	37.3942	40.1126	68.5413	66.5819	50.5647	60.6675	51.173	49.9991	43.9951	58.562	44.9651
1993	Nlrc5	205.419	-0.446416	0.161778	-2.75943	0.00579022	0.0435181	163.184	165.603	157.176	195.47	176.186	194.598	182.002	202.603	210.807	253.888	289.557	273.954
1994	Gmip	1866.32	0.200672	0.07273	2.75913	0.00579553	0.0435362	2097.71	2046.89	2055.57	1893.77	1797.71	1775.89	1910.16	1968.59	1921.59	1548.08	1684.47	1695.35
1995	Ccdc136	11.0116	-1.75005	0.634423	-2.75849	0.00580692	0.0436	2.53653	6.23236	3.2745	8.88499	9.21903	9.19358	6.93343	2.08869	21.6213	21.081	23.5875	17.4864
1996	Ifi205	15.4968	-0.970444	0.351869	-2.75797	0.00581618	0.0436475	12.6827	7.1227	7.36763	15.2314	15.365	19.9194	17.3336	21.9313	10.8106	22.9141	21.9607	13.323
1997	Lrrc56	33.2662	-0.706836	0.25643	-2.75644	0.00584337	0.0438077	19.4468	21.3681	27.8333	24.1164	34.8274	26.0485	49.4007	34.4634	31.0805	45.8282	41.4814	43.2997
1998	Trf	5767.61	-0.337859	0.122564	-2.7566	0.00584054	0.0438077	4927.64	4853.23	4666.16	5388.11	5113.49	4808.24	6279.08	5730.33	6210.7	7052.05	6975.38	7206.9
1999	Rbm39	7285.51	0.280096	0.101626	2.75614	0.0058488	0.0438265	9036.83	8045.09	8112.58	6387.04	6482	6455.43	6604.96	6554.32	5974.22	8326.99	7905.06	7541.64
[truncated: 21,719 more rows]

## Sheet: UT KO1 vs UT WT1,2,3
Column1	gene	baseMean	log2FoldChange	lfcSE	stat	pvalue	padj	KO1 UT R1	KO1 UT R2	KO1 UT R3	WT2 UT R1	WT2 UT R2	WT2 UT R3	WT3 UT R1	WT3 UT R2	WT3 UT R3	WT1 UT R1	WT1 UT R2	WT1 UT R3
1	1190002N15Rik	3138.37	-1.14696	0.045705	-25.0949	5.649e-139	9.20562e-135	1502.45	1671.86	1751.56	3698.43	3562.28	3607.4	3706.81	3596.36	3599.31	3614.34	3608.19	3741.46
2	P4ha2	702.456	-2.81957	0.14433	-19.5356	5.47159e-85	4.45825e-81	123.183	137.933	119.425	748.287	756.267	737.809	945.17	820.436	950.29	1059.8	986.127	1044.74
3	Arap2	1202.59	-2.14035	0.114844	-18.637	1.61008e-77	8.74597e-74	336.572	350.849	326.608	1478.14	1485.77	1432.57	1697.28	1727.87	1710.52	1317.21	1275.19	1292.46
4	Mkrn1	3022.99	-0.75347	0.0430138	-17.5169	1.06379e-68	4.33389e-65	1971.9	2004.19	2012.12	3311.38	3396.76	3313.46	3356.78	3222.06	3507.55	3476.76	3193.1	3509.83
5	Col4a5	993.648	1.35305	0.0778311	17.3845	1.08102e-67	3.52327e-64	1776.94	1769.98	1937.03	711.425	660.123	722.964	669.845	643.4	734.017	837.901	704.939	755.208
6	Prss50	575.699	-2.01694	0.120031	-16.8035	2.29995e-63	6.24666e-60	194.959	149.041	180.946	738.457	762.214	850.633	622.838	632.272	740.571	711.861	611.21	713.386
7	Parvg	4307.3	-0.68737	0.0422503	-16.269	1.63803e-59	3.81333e-56	3024.3	2980.83	2858.95	4905.03	4891.45	4659.93	4989.42	4851.8	4765.87	4597.81	4532.09	4630.17
8	Slc16a10	3274.05	0.804857	0.0498564	16.1435	1.26172e-58	2.57013e-55	4598.52	4716.56	5138.88	2902.22	2800.07	2930.45	2684.42	2703.09	2621.49	2648.62	2757.53	2786.79
9	Dcaf5	1240.12	-0.745269	0.0467103	-15.9551	2.62499e-57	4.75297e-54	828.335	826.67	811.545	1393.36	1440.18	1380.61	1350.6	1368.74	1430.02	1313.66	1372.86	1364.84
10	Bcl7a	240.988	-3.14784	0.207347	-15.1815	4.68945e-52	7.64193e-49	37.828	34.2517	32.5704	366.157	330.061	338.472	353.389	342.944	339.483	220.127	250.47	246.106
11	Pla2g7	90.5281	10.2788	0.692183	14.8499	6.97193e-50	1.03286e-46	355.971	339.74	388.13	0	0	1.48453	0	1.01164	0	0	0	0
12	Dapk1	1087.61	1.22958	0.0838716	14.6602	1.15867e-48	1.57347e-45	1881.7	1930.13	1912.6	837.983	761.222	803.128	956.082	858.878	857.227	714.524	720.692	817.136
13	Plpp1	98.8661	2.05129	0.144117	14.2335	5.67973e-46	7.11976e-43	224.058	204.585	255.135	66.3506	53.5234	74.2263	57.0795	50.5818	55.0513	55.0317	43.3203	47.4518
14	Ankrd44	1706.57	-1.16547	0.0840102	-13.8729	9.24061e-44	1.07561e-40	882.652	871.105	897.495	1749.69	1806.91	1735.41	2158.11	2121.4	2110.3	1994.45	1996.67	2154.63
15	Il1rn	639.747	2.02446	0.147866	13.6912	1.14571e-42	1.2447e-39	1250.26	1263.61	1899.94	385.816	330.061	454.265	308.901	302.479	407.642	369.245	333.172	371.572
16	Rasa3	2616.03	-0.66608	0.0494509	-13.4695	2.36373e-41	2.40746e-38	1856.48	1901.43	1692.75	2812.53	3011.19	2787.94	3005.91	2895.3	2996.36	2829.69	2771.71	2831.02
17	Elavl4	133.493	1.4821	0.114566	12.9366	2.79729e-38	2.68145e-35	255.096	241.614	275.943	97.0684	80.2852	96.4942	111.641	97.117	83.8877	78.1094	91.3664	93.2951
18	Ppp2r5c	5228.41	-0.463667	0.0360752	-12.8528	8.29561e-38	7.51029e-35	4039.83	4074.11	4093.91	5649.63	5582.3	5912.87	5753.28	5538.7	5668.97	5358.49	5422.91	5645.96
19	Zcchc24	329.522	-2.38944	0.186981	-12.779	2.14687e-37	1.84134e-34	80.5056	75.9093	80.5212	303.492	335.017	305.812	497.767	491.655	473.179	379.896	458.407	472.105
20	Slc37a3	865.608	-0.933259	0.0738198	-12.6424	1.23243e-36	1.00418e-33	548.02	498.965	496.698	908.02	910.89	969.395	1039.18	1027.82	1099.72	1003.88	938.081	946.624
21	Hck	390.948	1.28803	0.102108	12.6144	1.75814e-36	1.36432e-33	710.002	648.932	744.595	299.806	261.67	270.184	334.083	324.735	318.511	264.507	246.532	267.821
22	Zc3hav1l	298.866	-2.06139	0.169343	-12.1729	4.33493e-34	3.211e-31	87.2953	90.7208	86.8543	390.731	372.682	360.74	425.578	467.375	418.128	274.271	306.392	305.622
23	Setd5	3277.17	-0.614424	0.0508668	-12.0791	1.36233e-33	9.65238e-31	2346.3	2420.76	2264.55	3568.19	3512.72	3772.18	3526.34	3655.04	3432.84	3314.33	3764.14	3748.69
24	Naaa	280.176	1.2053	0.0999632	12.0574	1.77239e-33	1.20345e-30	480.124	469.341	509.364	206.424	197.244	203.38	225.8	254.932	239.866	202.374	186.671	186.59
25	B3gnt2	2264.98	-0.604482	0.0502726	-12.0241	2.65469e-33	1.73043e-30	1578.1	1566.32	1740.71	2493.06	2532.45	2449.47	2351.17	2367.23	2613.63	2569.62	2442.48	2475.54
26	Atp6v1b2	9329.74	0.487709	0.0408012	11.9533	6.23967e-33	3.91084e-30	11655.9	11940.9	12055.6	8599.77	8580.6	8821.05	8551.02	8415.79	8799.03	7850	8139.49	8547.76
27	Cep170b	722.712	-1.49308	0.12496	-11.9485	6.60994e-33	3.98947e-30	343.361	286.974	288.61	742.143	705.717	763.046	971.191	961.053	1011.9	850.328	812.058	936.168
28	Hectd1	6258.51	-0.493751	0.0416633	-11.851	2.12669e-32	1.23773e-29	4896.29	4727.67	4755.27	6433.55	6519.95	6759.05	6658.16	6578.66	6745.1	6789.31	7030.49	7208.65
29	Btbd3	263.387	0.936183	0.0791529	11.8275	2.8128e-32	1.5806e-29	386.039	418.427	423.415	213.796	209.138	233.071	194.742	230.653	217.584	201.487	209.513	222.782
30	Prune2	1510.94	-0.609625	0.0516153	-11.8109	3.42718e-32	1.86164e-29	1099.92	1085.87	1068.49	1578.9	1594.8	1621.1	1688.88	1639.86	1613.53	1686.45	1642.23	1811.21
31	Mical1	351.418	-2.04938	0.17403	-11.776	5.18881e-32	2.72764e-29	107.664	117.567	89.5685	382.13	416.293	406.76	349.192	354.072	403.71	599.135	492.276	498.646
32	Clec4a1	1431.24	-0.571266	0.0485267	-11.7722	5.4288e-32	2.76462e-29	987.407	1038.66	1120.06	1551.87	1518.48	1564.69	1623.41	1535.66	1574.21	1505.38	1567.41	1587.63
33	Chst10	340.999	-1.14996	0.0979403	-11.7415	7.81284e-32	3.85812e-29	181.38	172.184	180.042	399.332	466.843	424.574	393.681	398.584	370.941	366.582	365.466	372.376
34	Smpdl3b	1546.79	0.636916	0.0547621	11.6306	2.88116e-31	1.38093e-28	2148.43	2049.55	2138.79	1352.81	1387.64	1303.41	1244	1278.71	1457.55	1405.08	1414.6	1380.93
35	Itga8	231.047	-3.20277	0.275584	-11.6217	3.19553e-31	1.48784e-28	32.0083	35.1775	29.8562	197.823	203.191	169.236	364.302	380.375	378.805	300.011	354.439	327.337
36	Sod2	2683.42	0.763247	0.0658801	11.5854	4.88724e-31	2.21229e-28	3647.97	3742.7	4245	2091.27	2258.89	2324.77	2128.73	2279.21	2368.52	2265.17	2332.21	2516.55
37	Ehbp1l1	4354.14	0.5742	0.0499736	11.4901	1.47982e-30	6.51762e-28	6025.31	5645.98	5659.1	3772.15	3522.64	3862.74	3970.39	3895.81	4118.36	3940.09	3794.07	4043.06
38	Ifi204	640.37	-0.968196	0.0844375	-11.4664	1.94547e-30	8.343e-28	364.7	379.546	374.559	681.936	745.364	760.077	648.86	683.865	743.193	699.435	838.05	764.859
39	Zc3h14	2184.1	-0.509988	0.0448802	-11.3633	6.3673e-30	2.66055e-27	1596.53	1672.78	1699.09	2459.89	2441.26	2394.54	2310.04	2305.52	2363.27	2210.14	2415.7	2340.42
40	Col4a2	40.9446	2.30361	0.209766	10.9818	4.67468e-28	1.90446e-25	97.9647	86.0922	121.234	19.6594	21.8058	23.7524	29.3792	21.2443	18.3504	15.9769	14.9652	20.911
41	Kdm5a	2531.19	-0.50327	0.0459912	-10.9427	7.19898e-28	2.86133e-25	1949.59	1883.85	1953.32	2650.34	2654.37	2733.01	2759.12	2689.94	2629.36	2690.34	2819.76	2961.32
42	Asah2	485.637	-0.850137	0.0777889	-10.9288	8.39841e-28	3.25858e-25	284.195	319.374	304.895	546.778	500.543	587.872	536.38	493.678	559.688	557.417	552.924	583.899
43	Camk2a	175.847	-1.21057	0.110945	-10.9114	1.01625e-27	3.85135e-25	90.2051	93.498	82.3306	213.796	218.058	201.896	219.085	206.374	187.437	197.936	198.486	201.067
44	Gpatch2l	713.064	-0.682678	0.063145	-10.8113	3.04424e-27	1.12747e-24	511.162	463.787	497.603	749.516	736.443	768.984	786.522	828.529	820.527	762.455	829.386	801.855
45	Galnt3	148.19	-1.4483	0.134124	-10.7982	3.50914e-27	1.27078e-24	50.4373	71.2806	71.4739	180.621	161.562	173.69	196.421	191.199	171.708	158.882	174.069	176.939
46	Ndnf	129.874	-3.32542	0.308935	-10.7641	5.08341e-27	1.80085e-24	12.6093	25.9202	11.7615	147.446	129.844	108.37	146.056	136.571	166.465	226.34	231.567	215.544
47	Naglu	1322.63	-0.731723	0.0680632	-10.7506	5.88565e-27	1.99818e-24	879.742	905.357	870.353	1415.48	1387.64	1362.79	1602.42	1421.35	1482.45	1643.85	1411.45	1488.7
48	Cdca4	1250.59	-0.513797	0.0477904	-10.751	5.85972e-27	1.99818e-24	951.518	942.386	948.16	1404.42	1279.61	1346.46	1334.65	1331.31	1297.64	1379.34	1410.67	1380.93
49	Trem1	559.577	-1.76018	0.164204	-10.7195	8.24564e-27	2.74226e-24	239.577	207.362	154.709	823.238	790.958	636.862	780.647	673.749	701.249	657.717	529.295	519.557
50	Rnf157	831.229	-0.71766	0.0671086	-10.694	1.08571e-26	3.53853e-24	549.96	561.914	569.981	935.051	858.358	944.158	896.484	853.82	893.928	917.786	1012.91	980.403
51	Gsr	3108.05	-0.44782	0.0419113	-10.6849	1.1973e-26	3.82573e-24	2355.03	2489.27	2480.78	3190.97	3345.22	3332.76	3251.85	3260.5	3419.73	3229.12	3444.36	3496.96
52	Bin2	1263.97	-0.59442	0.055654	-10.6806	1.254e-26	3.92983e-24	883.622	947.014	913.78	1344.21	1319.25	1282.63	1458.05	1434.5	1456.24	1331.41	1386.25	1410.69
53	Slc39a7	3123.93	0.511588	0.0479468	10.6699	1.40784e-26	4.32871e-24	4107.73	4076.88	3896.68	2813.76	2727.71	2715.2	2789.34	2699.04	2786.64	3093.31	2906.4	2874.45
54	Cdkn1b	1656.6	-0.770969	0.0725619	-10.625	2.2807e-26	6.88264e-24	1029.11	1087.72	1132.72	1785.32	1689.95	1704.24	1872.71	1981.79	1876.99	2105.4	1805.27	1807.99
55	Bivm	631.883	-0.666455	0.0628544	-10.6032	2.88105e-26	8.53628e-24	397.678	464.713	452.366	734.771	710.672	684.366	688.312	682.854	692.074	695.884	667.132	711.777
56	Zfp746	803.763	-0.589075	0.0556423	-10.5868	3.43041e-26	9.98249e-24	593.608	618.383	538.316	871.158	905.934	889.231	893.127	846.739	866.403	863.642	891.61	867.001
57	G2e3	920.609	-0.879734	0.0831385	-10.5815	3.62906e-26	1.03753e-23	492.733	574.874	627.884	989.115	1016.95	915.952	1092.07	1085.48	1047.29	990.57	1093.25	1121.15
58	Rras2	78.5908	-3.54356	0.337319	-10.5051	8.18507e-26	2.29972e-23	10.6694	7.40578	8.14259	95.8397	107.047	89.0715	125.071	132.524	132.385	86.9855	77.9765	69.9713
59	Myo18a	1889.89	-0.499602	0.0476503	-10.4848	1.01499e-25	2.80343e-23	1431.64	1460.79	1432.19	2026.15	2064.62	2085.76	2140.48	1994.94	2120.79	1892.38	1962.8	2066.16
60	Rcsd1	2614.11	-0.637131	0.0612806	-10.3969	2.56022e-25	6.95356e-23	1914.68	1909.77	1713.56	2812.53	2871.43	2681.05	3127.62	2879.11	3043.55	2960.17	2755.17	2700.73
61	A530064D06Rik	80.6029	-4.0819	0.393389	-10.3763	3.17979e-25	8.49474e-23	4.84974	6.48006	7.23786	97.0684	88.2146	102.432	157.808	117.35	145.493	77.2218	85.0653	78.014
62	Gm15487	4873.17	0.750594	0.0724978	10.3533	4.04113e-25	1.06216e-22	7092.26	6838.31	7084.96	4059.67	4106.44	4067.6	3858.74	3728.89	4071.18	4567.63	4220.97	4781.37
63	Abcd4	410.499	-1.0212	0.0987222	-10.3442	4.44622e-25	1.15009e-22	225.998	250.871	218.945	401.79	433.143	448.327	520.431	541.225	481.044	465.994	474.16	464.063
64	Tnfrsf26	1193.25	-0.793043	0.0767306	-10.3354	4.8729e-25	1.24076e-22	778.868	764.647	766.308	1410.56	1356.92	1368.73	1181.04	1157.31	1330.41	1437.04	1346.87	1420.34
65	Hs1bp3	551.53	-0.683378	0.0663052	-10.3065	6.58254e-25	1.65029e-22	370.52	386.026	379.083	606.985	602.634	605.687	627.035	611.028	668.48	613.337	578.129	569.422
66	Togaram1	976.174	-0.529796	0.0514445	-10.2984	7.16424e-25	1.76892e-22	731.34	770.201	696.644	1087.41	1074.43	1022.84	1076.96	1096.61	1036.8	1022.52	1067.25	1031.07
67	Pde4a	669.186	-0.727114	0.0707023	-10.2842	8.30573e-25	2.02015e-22	454.905	460.084	432.462	723.713	680.937	714.057	765.537	828.529	734.017	708.311	782.128	745.557
68	Gm11613	89.1383	-1.91007	0.187589	-10.1822	2.38078e-24	5.70547e-22	31.0383	32.4003	23.523	109.356	118.941	118.762	120.874	109.257	108.792	114.501	92.9417	89.2738
69	Sh3tc2	146.746	-1.3131	0.129041	-10.1758	2.54239e-24	6.00447e-22	58.1968	77.7607	71.4739	176.935	190.306	173.69	156.969	158.827	187.437	167.758	162.254	179.352
70	Zfp36l1	4907.2	-0.708155	0.0697071	-10.159	3.02109e-24	7.03309e-22	3493.75	3313.16	3176.52	5285.93	5265.12	4786.11	5565.25	5326.26	5111.91	5854.66	5945.12	5762.58
71	Luc7l	1546.83	0.730506	0.0720692	10.1362	3.81793e-24	8.76295e-22	2276.47	2157.86	2180.4	1319.64	1216.17	1266.3	1212.1	1326.25	1255.69	1468.1	1427.99	1454.92
72	Atad2b	1149.97	-0.584388	0.0577896	-10.1123	4.87029e-24	1.10231e-21	842.884	841.482	829.64	1180.79	1212.21	1187.62	1287.65	1342.44	1188.85	1258.63	1298.03	1329.46
73	Dock2	9467.99	-0.295015	0.0292864	-10.0734	7.23975e-24	1.61615e-21	8066.08	8037.12	8165.21	9881.32	10069.3	10017.6	10130.8	9899.86	10248.7	9507.16	9836.07	9756.58
74	Ifi202b	1532.81	-1.31208	0.130317	-10.0684	7.62254e-24	1.67861e-21	652.775	733.172	789.831	1995.43	2252.94	1987.78	1873.55	1796.66	1748.53	1657.16	1481.55	1424.36
75	Zcchc11	979.08	-0.519918	0.0516741	-10.0615	8.17487e-24	1.75287e-21	707.092	754.464	752.737	1010	1016.95	1111.91	1074.44	1062.22	1093.16	1022.52	1062.53	1080.94
76	Atp2a3	3716.31	-1.0461	0.103969	-10.0616	8.16493e-24	1.75287e-21	2104.79	1945.87	2149.64	4041.24	3818.01	3697.95	4233.12	3929.19	4039.72	4935.98	4534.45	5165.81
77	Pcdh7	383.293	0.923788	0.0920067	10.0404	1.01223e-23	2.14225e-21	548.99	553.582	680.359	293.663	272.573	317.689	304.704	305.514	313.268	339.954	339.473	329.75
78	ENSMUSG00000115219.2	265.816	0.805326	0.0808285	9.96339	2.20417e-23	4.60502e-21	388.949	383.249	398.987	227.312	221.032	222.679	224.961	221.548	252.974	240.542	200.061	207.501
79	Copg1	3676.93	-0.338779	0.034278	-9.88326	4.92038e-23	1.01497e-20	3153.3	3062.29	2985.62	3933.11	3966.68	3911.73	3826.85	3869.5	3967.63	3702.21	3890.16	3854.05
80	Gstz1	316.255	-1.01454	0.102938	-9.85586	6.46615e-23	1.31715e-20	171.681	191.625	172.804	383.359	407.373	363.709	364.302	386.445	381.427	329.302	322.933	320.099
81	Ttn	20.6114	3.75051	0.380613	9.85386	6.59608e-23	1.32703e-20	59.1668	69.4292	74.1881	0	1.98235	5.9381	5.03643	7.08145	6.55373	3.55043	3.15057	11.2598
82	Nbas	648.443	-0.624205	0.0635021	-9.82968	8.38863e-23	1.66709e-20	472.364	462.861	449.652	715.112	774.108	690.305	736.158	694.993	688.141	663.93	701.001	732.688
83	Rab43	1490.54	-0.989914	0.100776	-9.82292	8.97069e-23	1.76128e-20	892.352	912.763	764.499	1758.29	1775.19	1733.93	1910.49	1827.01	1853.39	1516.92	1467.38	1474.22
84	Igf2r	95.1128	2.76905	0.282159	9.8138	9.81982e-23	1.90504e-20	243.457	220.322	325.704	46.6911	52.5323	71.2572	28.5398	24.2792	28.8364	31.0663	23.6292	45.039
85	Rdm1	146.201	-1.90387	0.194371	-9.79502	1.1828e-22	2.26763e-20	36.858	53.6919	52.4745	192.908	180.394	173.69	224.961	211.432	188.747	150.006	127.598	161.658
86	Tns3	3662.91	0.378173	0.0386165	9.79304	1.20617e-22	2.28556e-20	4436.54	4362.01	4490.19	3272.07	3258.98	3430.74	3526.34	3347.5	3483.96	3379.12	3384.5	3583.01
87	Gm20427	3231.85	0.484308	0.0495279	9.7785	1.39266e-22	2.60859e-20	4191.14	4173.16	3973.58	2942.77	2782.23	2841.38	2930.36	2793.12	2925.58	3220.24	3012.73	2995.9
88	Raph1	3574.23	-1.19708	0.123002	-9.73215	2.19887e-22	4.0719e-20	1749.79	1947.72	1747.94	3480.95	3262.95	3562.86	4550.41	4229.65	4451.29	4339.51	4720.33	4847.32
89	Ifrd1	3207.82	-0.465086	0.0480688	-9.67543	3.83466e-22	7.0213e-20	2442.33	2442.98	2599.3	3569.41	3709.97	3545.05	3251.02	3346.49	3358.13	3374.68	3407.34	3447.09
90	Tmc8	259.6	-0.833324	0.0862468	-9.66209	4.36851e-22	7.90992e-20	164.891	165.704	160.138	299.806	278.52	279.091	300.507	293.374	311.957	287.585	296.153	277.472
91	Phf3	4155.04	-0.374309	0.0388959	-9.62336	6.37178e-22	1.14104e-19	3338.56	3377.96	3483.22	4275.93	4419.65	4398.65	4432.06	4378.36	4505.03	4158.44	4631.33	4461.28
92	Zfp777	484.076	-0.829872	0.08642	-9.60277	7.78223e-22	1.36974e-19	321.053	310.117	286.8	556.608	512.437	507.708	602.693	610.016	549.202	499.723	544.26	508.297
93	Nup210	2624.92	-0.610215	0.0635488	-9.60231	7.817e-22	1.36974e-19	1937.96	1981.97	1728.04	2876.42	2959.65	2721.14	2887.55	3113.81	2726.35	2640.63	3023.76	2901.8
94	Adamtsl5	83.3452	-2.38795	0.249251	-9.5805	9.65787e-22	1.67431e-19	25.2186	9.25723	25.3325	87.2387	84.2499	114.308	118.356	114.315	127.142	107.4	79.5518	107.772
95	Ubr7	1393.6	-0.451374	0.0472045	-9.56208	1.15413e-21	1.97975e-19	1088.28	1132.16	1055.82	1554.32	1512.53	1475.62	1531.91	1488.12	1519.15	1479.64	1491.01	1394.6
96	Tlr5	190.217	-1.21091	0.126836	-9.54701	1.335e-21	2.26616e-19	112.514	97.2009	78.7117	206.424	232.926	187.05	253.5	219.525	245.109	219.239	222.903	207.501
97	Trf	5066.38	-1.18554	0.124935	-9.48929	2.32621e-21	3.90803e-19	2672.21	2700.33	2400.25	5215.89	4947.95	4658.44	6081.49	5550.84	6024.19	6829.25	6754.81	6960.94
98	Poglut1	811.264	-0.603363	0.0636585	-9.47812	2.58917e-21	4.30541e-19	548.02	550.805	651.407	938.738	860.34	899.623	874.66	859.89	863.781	916.898	875.857	895.15
99	C1ra	750.453	-0.607801	0.0641817	-9.47001	2.79828e-21	4.60613e-19	519.892	568.394	526.554	869.93	891.066	843.211	790.719	761.761	802.176	796.184	815.996	819.549
100	Mpp5	832.534	-0.595148	0.062913	-9.45986	3.08358e-21	5.025e-19	580.029	585.057	639.646	919.078	935.669	887.746	961.958	885.181	960.776	855.653	849.077	930.538
101	Pnpla8	1349.2	-0.617782	0.0655697	-9.42175	4.43628e-21	7.15778e-19	890.412	929.426	1069.39	1443.74	1380.71	1454.84	1445.46	1420.34	1519.15	1582.6	1539.05	1515.24
102	Stk17b	2829.23	-1.18267	0.1256	-9.41613	4.68026e-21	7.4774e-19	1371.51	1431.17	1543.47	3355.62	3502.81	3255.57	3832.72	3690.44	3694.99	3126.15	2561.41	2584.92
103	Cd28	2336.43	-3.68974	0.391952	-9.41377	4.78665e-21	7.57313e-19	248.307	240.688	217.136	1850.44	1654.27	1667.12	2659.23	2330.81	2845.63	4604.91	4618.73	5099.86
104	Zfp618	166.715	-3.85801	0.410866	-9.38995	6.00293e-21	9.40613e-19	20.3689	14.8116	9.95206	184.307	189.314	224.163	114.998	120.385	112.724	310.663	343.412	355.486
105	Abhd12	9862.51	0.449053	0.0478372	9.38711	6.16682e-21	9.5709e-19	12767.4	12531.5	11722.6	9029.82	8863.09	8359.36	9101.67	8835.62	8817.38	9574.62	9320.95	9426.02
106	Ppp2r5e	1558.44	-0.562039	0.0599271	-9.37871	6.67843e-21	1.02671e-18	1110.59	1199.74	1131.82	1739.86	1758.34	1769.55	1793.81	1752.15	1679.06	1563.08	1568.19	1635.08
107	Ulbp1	2342.19	0.725722	0.0776921	9.34101	9.54213e-21	1.45326e-18	3108.68	3412.21	3467.84	2007.72	2076.51	2140.69	1777.02	1918.06	1773.44	2069.9	2214.85	2139.35
108	Timp2	4738.15	0.45926	0.0492777	9.31985	1.1651e-20	1.75801e-18	5895.34	5965.36	6011.04	4418.46	4187.71	4259.1	4345.6	4014.17	4295.31	4202.82	4565.17	4697.73
109	Gm28048	2988.81	-0.424481	0.0455872	-9.31142	1.26134e-20	1.88575e-18	2365.7	2274.5	2492.54	3230.29	3301.6	3214	3059.63	3049.07	3309.63	3310.78	3089.13	3168.82
110	Gpr137b	2217.09	0.802636	0.0862757	9.30314	1.36354e-20	2.02002e-18	3148.45	3369.63	3257.94	1800.07	1832.68	2182.25	2026.32	1947.4	1938.59	1821.37	1572.13	1708.27
111	Ncapd2	5242.45	-0.45485	0.048918	-9.29821	1.42829e-20	2.09562e-18	4138.77	4295.35	3873.16	5620.14	5723.04	5553.61	5785.18	5886.7	5586.4	5124.16	5697.01	5625.86
112	Acsf2	409.616	-0.900367	0.0968415	-9.29732	1.44029e-20	2.09562e-18	256.066	254.574	236.135	406.704	445.038	431.997	443.206	436.015	466.625	518.363	530.87	489.799
113	Aak1	2953.32	-0.486029	0.0523066	-9.29194	1.51508e-20	2.18493e-18	2294.9	2258.76	2260.02	3118.48	2928.92	3181.34	3306.42	3241.28	3292.59	2945.08	3268.71	3343.34
114	Atp6v0b	2324.37	0.572865	0.0619263	9.25076	2.22899e-20	3.18629e-18	3240.59	2933.62	3075.19	1929.08	1928.83	1953.64	2153.07	2106.22	2160.11	2282.93	2014.79	2114.42
115	Plekha8	732.67	-0.573783	0.0622176	-9.22221	2.91051e-20	4.12433e-18	551.9	529.513	527.459	760.574	819.702	846.18	756.304	853.82	744.503	790.858	786.854	824.375
116	Bax	2205.22	0.610944	0.0662637	9.21989	2.97415e-20	4.17816e-18	3209.56	3016.93	2705.15	1845.53	1836.65	1866.05	2106.07	1947.4	1930.73	2124.93	1968.32	1905.31
117	Cflar	3037.2	-0.624707	0.0682825	-9.14886	5.7536e-20	8.01373e-18	2108.67	2143.97	2223.83	3267.15	3226.27	3276.35	3482.69	3593.33	3744.8	3043.61	3063.14	3272.57
118	Six1	86.0493	-2.00302	0.219787	-9.11346	7.97991e-20	1.10204e-17	25.2186	20.3659	33.4751	122.871	134.8	121.731	94.8528	87.0006	78.6447	99.412	100.818	113.402
119	Kansl1l	275.144	-0.846842	0.0931186	-9.09423	9.52578e-20	1.30447e-17	184.29	154.596	178.232	301.035	314.202	283.544	331.565	318.665	323.754	286.697	293.79	331.358
120	Il4ra	539.299	-0.758431	0.0839256	-9.03694	1.61119e-19	2.16991e-17	342.391	336.037	389.035	545.549	628.405	580.45	648.86	599.9	524.298	628.426	608.847	639.393
121	Rab10	5164.14	-0.424842	0.0470079	-9.03769	1.60024e-19	2.16991e-17	3952.54	4129.65	4240.48	5456.72	5472.28	5705.03	5816.24	5486.1	5788.25	5201.38	5211.04	5510.04
122	Ubxn2a	768.22	-0.624387	0.0691381	-9.031	1.70105e-19	2.27215e-17	508.252	533.216	598.933	857.642	864.305	825.396	848.638	800.203	757.611	852.103	889.247	883.086
123	Snx6	2546.47	-0.616617	0.0683498	-9.02149	1.85541e-19	2.45819e-17	1631.45	1844.97	1977.74	2826.04	2957.67	2871.07	2903.5	2883.16	2836.45	2543.88	2662.23	2619.5
124	Nfya	4636.23	0.410874	0.0456138	9.00767	2.10476e-19	2.76606e-17	5713.96	5832.98	5546.01	4171.48	4058.86	4036.43	4387.57	4251.9	4236.33	4383.01	4477.74	4538.48
125	Agap3	1355.61	0.590107	0.0655906	8.99682	2.32342e-19	3.029e-17	1922.44	1739.43	1774.18	1105.84	1147.78	1143.08	1227.21	1238.24	1346.14	1283.48	1188.55	1150.91
126	Nin	5523.39	-0.633975	0.0706238	-8.97678	2.78797e-19	3.60577e-17	3833.23	3981.53	3903.02	6013.33	6003.55	6243.92	6317.36	6678.81	6404.3	5116.17	5919.91	5865.53
127	Bphl	233.82	-0.854208	0.0953344	-8.96012	3.2432e-19	4.16152e-17	148.402	143.487	146.567	255.573	263.653	256.823	260.216	256.955	237.245	268.945	296.941	271.038
128	Cpt1c	76.3333	2.81275	0.314046	8.95648	3.35219e-19	4.26776e-17	218.238	230.505	192.708	35.6327	43.6117	46.0203	13.4305	21.2443	10.486	38.1671	37.8068	28.1494
129	Tbl3	1419.83	0.429407	0.0480347	8.93952	3.90855e-19	4.93749e-17	1846.78	1790.35	1642.99	1311.04	1313.31	1321.23	1255.75	1312.09	1270.11	1313.66	1290.16	1370.47
130	Epn2	181.24	1.5211	0.170752	8.90822	5.18573e-19	6.50051e-17	341.422	362.883	362.798	94.611	84.2499	92.0406	127.59	136.571	127.142	137.579	154.378	153.615
131	Arhgap5	1579.25	-0.665293	0.0749073	-8.88156	6.59312e-19	8.20165e-17	968.978	1046.07	1276.58	1720.2	1739.51	1634.46	1735.89	1706.63	1751.16	1752.14	1744.63	1874.75
132	Aatk	143.97	-1.35348	0.152435	-8.87906	6.74298e-19	8.32452e-17	74.686	62.0234	63.3313	158.504	130.835	143.999	198.1	184.118	190.058	183.735	168.555	169.701
133	Lmna	9045.33	0.590327	0.0665424	8.87143	7.22115e-19	8.84781e-17	12283.4	11603.9	12376.7	8474.44	8123.67	8507.82	8415.87	8171.99	8585.38	7414.18	7299.86	7286.67
134	Zc3h6	97.2145	-1.78364	0.201259	-8.86239	7.83165e-19	9.52422e-17	37.828	29.6231	36.1893	104.441	100.109	105.401	119.195	105.21	111.413	114.501	140.2	162.462
135	Rcor1	1900.92	-0.472507	0.0533315	-8.8598	8.01556e-19	9.67567e-17	1471.41	1500.6	1444.86	2001.58	1978.39	2109.51	2170.7	2126.46	2116.85	1860.43	2016.36	2013.89
136	Cog5	1086.84	-0.504369	0.057069	-8.83789	9.75468e-19	1.16884e-16	755.589	844.259	880.305	1178.34	1192.38	1135.66	1238.12	1160.35	1226.86	1145.9	1134.2	1150.1
137	Kdelc1	683.321	-0.56676	0.0641666	-8.83263	1.02247e-18	1.21621e-16	479.154	524.885	501.222	717.569	739.417	779.376	688.312	746.587	754.989	718.962	745.109	804.268
138	Dhx40	502.987	-0.776309	0.0879506	-8.82665	1.07856e-18	1.27364e-16	311.353	338.815	331.132	555.379	520.367	599.748	623.678	572.585	622.604	522.801	500.94	536.447
139	Rdh11	1964.41	-0.485902	0.0551394	-8.81225	1.22661e-18	1.43804e-16	1440.37	1497.82	1593.23	2125.68	2189.51	2002.63	2064.94	2177.04	2225.65	1940.31	2128.21	2187.61
140	Aldh6a1	179.97	-0.998218	0.113438	-8.79966	1.37225e-18	1.5973e-16	99.9046	104.607	104.044	197.823	172.464	215.256	209.012	192.211	226.759	206.813	206.362	224.391
141	Gfer	594.313	0.530835	0.060435	8.78358	1.58359e-18	1.83022e-16	781.778	790.567	747.309	561.522	541.182	531.46	517.073	547.295	486.287	557.417	562.376	507.493
142	Itpr1	1656.09	-0.51688	0.0591316	-8.74118	2.30684e-18	2.64734e-16	1257.05	1272.87	1225.91	1743.55	1796.01	1722.05	1944.06	1910.98	1829.8	1621.66	1754.87	1794.32
143	Cxcr3	140.643	1.10374	0.127003	8.69063	3.60427e-18	4.10736e-16	222.118	220.322	259.658	109.356	119.932	132.123	85.6193	122.408	98.3059	101.187	98.4552	118.227
144	Hoxa7	415.362	-1.53836	0.177542	-8.66481	4.52279e-18	5.11829e-16	167.801	188.847	155.614	579.953	596.687	614.594	522.11	522.004	504.637	363.031	410.361	358.704
145	Lipn	57.2379	2.09683	0.242271	8.65489	4.93389e-18	5.54501e-16	119.304	96.2752	186.375	30.7179	24.7794	41.5667	23.5033	26.3025	39.3224	37.2795	23.6292	37.8006
146	Erc1	1111.33	-0.415621	0.0481116	-8.63869	5.68617e-18	6.34671e-16	890.412	900.728	874.876	1156.22	1145.8	1199.5	1161.74	1183.61	1232.1	1149.45	1189.34	1252.25
147	Syne3	1629.32	-1.01047	0.117459	-8.60279	7.78034e-18	8.62507e-16	945.699	899.802	929.16	2012.63	2021.01	1892.77	2077.53	2084.98	2035.59	1461.89	1590.25	1600.49
148	Pcyox1	4153.42	-0.47144	0.054965	-8.57709	9.7306e-18	1.07142e-15	3223.14	3215.96	3216.32	4438.12	4590.13	4710.4	4587.35	4480.53	4799.95	4316.43	4055.57	4207.13
149	Mnat1	508.757	-0.721441	0.0841327	-8.57504	9.90511e-18	1.07609e-15	325.902	329.557	370.036	540.634	636.334	611.625	535.54	534.143	540.027	600.91	560.013	520.361
150	Vrk1	1163.11	-0.612913	0.0714715	-8.57563	9.85443e-18	1.07609e-15	806.026	872.031	816.973	1384.76	1341.06	1304.9	1305.27	1335.36	1291.08	1151.23	1173.59	1175.04
151	Tshz1	301.706	-1.75977	0.205541	-8.56162	1.11291e-17	1.20106e-15	101.844	112.012	110.377	380.901	331.052	305.812	501.125	473.445	454.829	268.057	289.064	291.949
152	Naa20	3348.79	0.690843	0.0807113	8.55943	1.13423e-17	1.21602e-15	4698.43	4670.27	4693.75	2716.69	3039.93	2804.27	2795.22	2871.02	2597.9	3434.15	3167.11	2696.71
153	Mta1	1718.58	-0.480388	0.0562534	-8.53972	1.34552e-17	1.43311e-15	1383.15	1326.56	1271.15	1892.22	1769.25	1824.48	1886.14	1817.91	1701.35	1816.93	1938.39	1995.39
154	Mkks	706.581	0.568012	0.066577	8.53165	1.44278e-17	1.52673e-15	926.3	950.717	929.16	663.506	653.184	593.81	610.247	588.772	602.943	718.962	629.325	612.048
155	Tiam1	236.701	2.22029	0.261061	8.50487	1.818e-17	1.91137e-15	593.608	526.736	610.694	82.3238	73.3469	80.1644	100.729	112.291	137.628	164.207	191.397	167.288
156	Sos2	1373.32	-0.572708	0.0674294	-8.49345	2.00594e-17	2.09543e-15	1005.84	1025.7	985.254	1442.51	1457.03	1480.07	1675.45	1571.07	1592.56	1358.04	1456.35	1429.99
157	Wnk1	18021.6	-0.43858	0.0516555	-8.49049	2.05769e-17	2.13581e-15	14590	14373.7	13729.3	18518	18393.2	18771.8	19367.6	19527.6	19746.4	18013.1	20358.2	20870.8
158	Mlkl	864.764	-0.681201	0.0802457	-8.48895	2.08513e-17	2.15059e-15	618.826	605.423	562.744	890.818	1059.57	1028.78	946.849	925.646	848.052	883.169	1035.75	971.556
159	Plekhm3	3859.94	-0.370198	0.0437101	-8.4694	2.46663e-17	2.52806e-15	3201.8	3133.57	3161.13	4106.36	3928.03	4082.45	4156.73	3982.81	4221.91	3936.54	3993.34	4414.63
160	Dlst	4404.55	-0.316714	0.0374071	-8.46668	2.52493e-17	2.57165e-15	3734.3	3591.8	3833.35	4487.26	4681.32	4808.38	4489.98	4585.74	4501.1	4636.86	4779.41	4725.08
161	Ube2w	1207.9	-0.797379	0.094233	-8.46179	2.63315e-17	2.6652e-15	760.439	747.984	822.402	1367.56	1570.02	1416.24	1395.93	1412.24	1399.88	1279.93	1133.42	1188.71
162	Foxn3	1571.08	-0.584101	0.0690406	-8.46026	2.66783e-17	2.68364e-15	1172.67	1136.79	1120.06	1679.65	1819.8	1693.84	1823.19	1846.23	1722.32	1474.32	1648.53	1715.5
163	Creb5	578.592	-0.930444	0.11007	-8.45321	2.83408e-17	2.83338e-15	351.121	347.146	336.56	608.213	583.802	635.377	576.671	607.993	648.819	700.322	739.595	807.485
164	Cirbp	550.694	-0.682838	0.0809157	-8.43888	3.20397e-17	3.17992e-15	365.67	416.575	355.56	566.437	649.22	558.182	622.838	685.889	581.971	607.123	586.005	612.852
165	Gpr137b-ps	2102.66	0.654456	0.0775577	8.4383	3.21973e-17	3.17992e-15	2796.36	2910.47	2969.33	1935.22	1846.56	2056.07	1948.26	1867.48	1934.66	1633.2	1611.51	1722.74
166	Plekhg3	987.215	-1.14321	0.13553	-8.43511	3.30886e-17	3.22881e-15	549.96	503.593	499.412	1124.27	1086.33	1091.13	1345.57	1419.32	1343.51	969.267	949.896	964.317
167	Dock5	596.705	-0.590548	0.0700068	-8.43558	3.29555e-17	3.22881e-15	424.837	426.758	446.033	654.905	612.546	691.789	611.087	646.435	614.74	657.717	651.379	722.233
168	Pik3cg	2362.86	-0.926141	0.110054	-8.41532	3.91833e-17	3.80078e-15	1403.51	1443.2	1383.34	2778.12	2867.47	2826.54	2977.37	2895.3	3022.58	2197.72	2256.59	2302.62
169	Ncoa1	852.174	-0.615677	0.0732982	-8.39962	4.47938e-17	4.31928e-15	645.985	600.794	582.648	900.647	839.525	941.189	966.155	943.856	874.267	940.864	933.355	1056.81
170	Hyou1	7649.94	0.291538	0.0347129	8.39855	4.52021e-17	4.33302e-15	9167.94	8974.88	8462.87	7152.34	7350.55	6977.27	7220.56	7466.88	7236.63	7378.68	7325.06	7085.6
171	Mink1	1985.52	0.433726	0.0517129	8.3872	4.97852e-17	4.74444e-15	2482.1	2411.51	2505.2	1892.22	1737.53	1866.05	1739.25	1751.14	1719.7	1872.85	1891.13	1957.59
172	1600014C10Rik	451.267	-0.715781	0.0853512	-8.38629	5.01705e-17	4.75336e-15	346.271	286.048	281.372	514.831	502.526	519.584	472.585	435.003	522.987	505.936	523.782	504.276
173	Gm20425	5620.43	-0.96733	0.115381	-8.38383	5.12347e-17	4.82613e-15	3334.68	3410.36	3080.61	5771.27	5448.49	5145.37	6594.36	6093.08	6511.78	7309.45	7301.44	7444.31
174	Antxr1	218.915	-2.01335	0.240305	-8.37829	5.37042e-17	5.02968e-15	72.7461	71.2806	56.9981	230.998	223.014	185.566	238.391	212.443	232.002	328.415	389.882	385.244
175	Rdh13	790.27	0.516755	0.0617196	8.37262	5.63502e-17	5.24733e-15	991.286	1030.33	1033.2	723.713	732.478	797.19	689.991	727.366	741.882	654.167	685.248	676.389
176	I830077J02Rik	170.572	-1.00594	0.120251	-8.36536	5.99294e-17	5.54892e-15	101.844	86.0922	102.235	211.339	173.456	219.71	182.151	188.164	204.476	206.813	199.273	171.309
177	0610030E20Rik	665.956	-0.648974	0.0775897	-8.36418	6.05358e-17	5.57339e-15	485.944	466.564	447.843	743.372	755.275	708.119	778.968	790.087	781.204	636.414	692.337	705.343
178	Manba	4262.5	0.253488	0.0303492	8.35237	6.69075e-17	6.12542e-15	4873.99	4816.54	4854.79	4117.42	4130.23	4112.14	4045.09	3916.04	3987.29	4199.27	4007.52	4089.7
179	Nudt3	2288.84	0.443284	0.0530823	8.35089	6.77513e-17	6.16802e-15	2894.32	2696.63	2976.57	2189.57	2066.6	2088.73	2053.18	2015.18	1998.89	2279.38	2173.1	2033.99
180	Gm45140	2551.89	-0.653827	0.0784873	-8.33036	8.05975e-17	7.29676e-15	1810.89	1844.97	1695.47	2988.23	3038.94	2879.98	2966.46	2823.47	3009.47	2528.79	2532.27	2503.69
181	Chd3	1457.86	-3.63777	0.437104	-8.32243	8.61749e-17	7.7586e-15	159.071	142.561	154.709	839.212	780.055	809.067	2349.49	2288.32	2462.89	2374.35	2546.44	2588.13
182	Ankmy2	549.057	-0.624469	0.0751301	-8.31184	9.42264e-17	8.43689e-15	388.949	389.729	389.94	668.42	604.617	617.563	621.16	612.039	627.847	559.193	564.739	544.49
183	Arid4a	1239.81	-0.595632	0.0717615	-8.30016	1.03967e-16	9.25817e-15	834.155	932.203	920.113	1327.01	1326.19	1331.62	1416.08	1408.2	1542.75	1266.62	1338.2	1234.55
184	Odf2	2433.29	-0.48134	0.0580148	-8.29685	1.06904e-16	9.468e-15	1910.8	1920.87	1794.99	2683.51	2696.99	2784.97	2492.19	2622.16	2546.78	2411.63	2823.69	2510.92
185	Avl9	1177.28	-0.452455	0.0545558	-8.29343	1.10027e-16	9.69193e-15	890.412	927.574	949.969	1213.97	1206.26	1261.85	1322.9	1245.32	1292.39	1203.6	1255.5	1357.6
186	Cers6	873.625	0.909285	0.1097	8.28883	1.14369e-16	1.00202e-14	1314.28	1282.13	1440.33	614.357	567.943	687.335	736.158	729.389	862.47	701.21	738.808	809.094
187	Sf3b1	14736	-0.262605	0.0316916	-8.28627	1.16858e-16	1.01835e-14	12456.1	12937.9	13055.3	15429	15726	15330.7	15169.7	15430.5	15457.6	14545.2	15674.9	15619.7
188	Nrcam	676.482	1.52476	0.184303	8.2731	1.30516e-16	1.13133e-14	1349.2	1413.58	1210.53	448.481	491.623	434.966	580.029	630.249	504.637	308.887	416.662	328.946
189	Ergic1	2812.05	0.522673	0.0631824	8.27244	1.31239e-16	1.13158e-14	3683.86	3729.74	3520.31	2298.92	2503.71	2400.48	2519.89	2483.56	2474.69	2555.42	2838.66	2735.32
190	Ttc27	1242.21	0.442791	0.0536501	8.2533	1.54077e-16	1.3215e-14	1510.21	1557.99	1579.66	1170.96	1217.16	1184.65	1103.82	1064.24	1049.91	1168.98	1163.35	1135.63
191	Itpr2	1349.17	-0.651259	0.078919	-8.25225	1.5544e-16	1.3262e-14	958.308	913.688	965.349	1416.71	1403.5	1359.83	1440.42	1454.73	1456.24	1461	1598.91	1761.35
192	Cpsf3	1739.67	-0.576697	0.0699352	-8.24616	1.63572e-16	1.38831e-14	1248.32	1247.87	1313.67	2040.89	2052.72	2038.25	1820.67	1910.98	1918.93	1673.14	1817.88	1792.71
193	Golga5	762.999	-0.574966	0.0697661	-8.24134	1.7029e-16	1.43785e-14	531.531	566.542	572.696	865.015	907.916	889.231	769.734	787.052	866.403	782.87	818.359	798.638
194	Dicer1	2519.4	-0.738382	0.0899073	-8.21271	2.16253e-16	1.81652e-14	1664.43	1711.66	1656.56	2941.54	3061.74	3049.22	2940.44	2947.9	2840.39	2266.95	2596.07	2555.96
195	Tulp4	2467.19	0.556404	0.0678053	8.20591	2.28856e-16	1.91253e-14	3061.15	3225.22	3447.94	2212.91	2088.41	2278.75	2345.3	2259.99	2440.61	1970.49	2094.34	2181.18
196	Myof	4286.21	0.901589	0.110041	8.19324	2.54292e-16	2.11425e-14	6408.44	6308.8	7022.53	3222.92	3340.26	3738.04	3062.15	2994.44	3280.8	3712.86	4047.69	4295.6
197	Msrb1	1825.23	0.471094	0.0575113	8.19132	2.58371e-16	2.13727e-14	2312.35	2275.43	2332.4	1618.22	1688.96	1622.59	1681.33	1562.98	1837.67	1761.01	1526.45	1683.33
198	Wdr46	1353.85	0.415532	0.0507392	8.18956	2.62186e-16	2.15787e-14	1697.41	1728.32	1581.47	1256.97	1250.86	1153.48	1274.22	1218.01	1213.75	1254.19	1315.36	1302.11
199	Errfi1	151.152	0.885432	0.108402	8.16806	3.13379e-16	2.56625e-14	260.916	211.065	221.659	122.871	115.967	117.278	143.538	122.408	114.035	136.692	129.173	118.227
200	ENSMUSG00000115293.2	177.195	0.799536	0.0981362	8.1472	3.72434e-16	3.03459e-14	257.036	251.797	272.324	143.76	153.632	129.154	148.575	137.582	173.018	171.308	141.775	146.377
201	Glul	1918.82	0.374005	0.0459546	8.13858	3.99935e-16	3.19478e-14	2316.23	2310.6	2310.69	1813.58	1793.04	1874.96	1766.95	1805.77	1908.45	1672.25	1724.15	1729.18
202	Srpr	4102.48	0.297785	0.0365838	8.13979	3.9597e-16	3.19478e-14	4829.37	4675.83	4802.32	3788.13	4028.14	4079.48	3857.07	3723.83	3785.43	3824.7	3946.08	3889.44
203	Prkar2b	163.546	-1.15871	0.142367	-8.13892	3.98824e-16	3.19478e-14	92.145	99.0523	64.236	165.876	168.5	173.69	194.742	215.478	217.584	200.599	196.123	174.526
204	Strn3	1693.4	-0.430673	0.0529141	-8.1391	3.98218e-16	3.19478e-14	1358.9	1289.53	1377	1961.03	1890.17	1858.63	1793.81	1791.61	1793.1	1778.77	1731.24	1697.01
205	Daglb	949.438	0.472915	0.0583036	8.11126	5.00973e-16	3.98237e-14	1242.5	1189.55	1171.63	866.243	822.675	834.304	930.9	900.355	910.968	850.328	794.73	879.065
206	Blvrb	1414.88	-0.603459	0.0744092	-8.11001	5.06152e-16	4.00401e-14	1001.96	1049.77	1002.44	1495.35	1432.25	1491.95	1687.2	1595.35	1706.59	1655.39	1393.34	1466.99
207	Casp8	1840.54	-0.753053	0.0929503	-8.10167	5.42083e-16	4.26753e-14	1204.67	1236.77	1203.29	2260.83	2088.41	2195.61	2212.67	2114.32	2182.39	1669.59	1840.72	1877.16
208	Efhd2	13248.6	0.462905	0.0572156	8.09054	5.93988e-16	4.65367e-14	17007.1	16553.8	16481.5	13114.1	12946.7	12707.5	12208.3	11758.2	12086.4	11689.8	11143.6	11286.3
209	Camkk2	878.343	0.613475	0.0759269	8.07981	6.48661e-16	5.0577e-14	1232.8	1166.41	1158.06	749.516	747.346	783.83	844.441	815.378	875.578	683.458	712.815	770.489
210	Dock4	1095.1	-1.20609	0.149291	-8.07881	6.54008e-16	5.07511e-14	562.57	598.943	496.698	1390.9	1376.74	1327.17	1440.42	1509.36	1416.92	911.573	1051.5	1058.42
211	Iffo1	499.092	-0.728707	0.0902288	-8.07621	6.68083e-16	5.13541e-14	320.083	367.512	315.752	518.517	484.685	540.367	625.357	609.004	578.039	537.89	547.411	544.49
212	Mrps6	297.154	0.723195	0.0895433	8.07648	6.66646e-16	5.13541e-14	415.138	423.055	422.51	232.227	253.741	293.936	247.624	255.944	304.093	241.429	227.628	248.519
213	Itsn2	5344.53	-0.478431	0.0593035	-8.06749	7.17556e-16	5.48981e-14	4054.38	4129.65	4194.34	5851.14	5937.14	6039.05	6133.53	5838.15	5965.2	5168.54	5324.46	5498.78
214	Nectin4	213.159	-1.26833	0.157267	-8.06481	7.33494e-16	5.58552e-14	107.664	102.755	99.5206	309.636	271.582	256.823	261.055	266.06	280.5	205.037	192.184	205.088
215	Mbd4	425.644	-0.559515	0.0694531	-8.05601	7.8822e-16	5.97434e-14	315.233	294.38	332.037	443.566	486.667	461.688	454.118	478.503	475.801	444.691	449.743	471.301
216	Tpm1	1724.05	0.374763	0.0465307	8.0541	8.0064e-16	6.04039e-14	1986.45	2032.89	2224.74	1571.53	1659.23	1586.96	1563.81	1571.07	1612.22	1578.17	1639.08	1662.42
217	Vgll4	943.611	-0.710845	0.0882758	-8.05255	8.10877e-16	6.08942e-14	658.594	639.674	617.027	1075.12	1082.36	993.148	1213.78	1028.83	1149.52	997.671	910.513	957.079
218	Xpc	415.702	-0.720243	0.0895061	-8.04686	8.4945e-16	6.34984e-14	282.255	269.385	289.514	403.018	434.135	440.904	450.76	438.038	473.179	519.25	478.886	509.102
219	Acy1	1044.35	0.512809	0.0637931	8.03863	9.08509e-16	6.76031e-14	1367.63	1348.78	1318.2	1012.46	1002.08	1040.65	964.476	890.239	895.239	923.112	878.22	891.129
220	Etv6	2309.2	-0.513214	0.0638896	-8.03282	9.52582e-16	7.05603e-14	1749.79	1795.9	1698.18	2607.33	2630.58	2584.56	2539.2	2523.02	2590.03	2149.79	2461.38	2380.63
221	Cox7a2l	2580.2	0.605796	0.0754412	8.03004	9.74388e-16	7.1849e-14	3423.91	3353.89	3646.07	2198.17	2170.67	2197.1	2272.27	1996.97	2259.73	2636.19	2388.13	2419.24
222	Ppm1a	2453.26	-0.379298	0.0472898	-8.02071	1.05132e-15	7.71728e-14	2015.55	1997.71	1987.7	2572.93	2659.32	2700.35	2695.33	2589.79	2768.29	2518.14	2485.01	2449
223	Msto1	1103.09	0.39422	0.0492823	7.99922	1.25208e-15	9.14975e-14	1361.81	1369.14	1298.29	1049.32	1039.74	1085.19	1039.18	998.484	988.302	1038.5	1016.85	952.253
224	Cbr1	250.881	-0.83137	0.103966	-7.99656	1.2794e-15	9.30763e-14	158.101	155.521	162.852	288.748	239.864	256.823	279.522	274.153	268.703	306.225	306.392	313.665
225	Pms1	496.412	-0.57679	0.0721869	-7.99023	1.3469e-15	9.75516e-14	340.452	373.066	373.654	571.352	592.723	550.759	502.804	515.934	511.191	538.778	548.986	537.251
226	Fosb	267.673	-2.93291	0.367548	-7.97966	1.46736e-15	1.05806e-13	57.2269	54.6176	22.6183	498.858	406.382	305.812	585.905	420.84	255.595	215.689	225.265	163.266
227	B430306N03Rik	730.578	-1.03074	0.129311	-7.971	1.5739e-15	1.12988e-13	394.769	425.832	408.034	879.759	888.093	889.231	942.652	954.984	899.171	609.786	704.939	769.685
228	Mrps18a	1094.96	0.482579	0.0606629	7.9551	1.78993e-15	1.27933e-13	1469.47	1321.01	1386.95	1002.63	1039.74	1027.29	951.885	946.89	896.55	1055.37	1005.82	1035.9
229	Abcb6	1078.64	0.412052	0.0518027	7.95424	1.80228e-15	1.28253e-13	1306.52	1385.81	1282.91	949.796	1052.63	988.694	953.564	1012.65	1061.7	963.054	1001.88	984.424
230	Gm45808	1444.05	0.523119	0.0658152	7.9483	1.89086e-15	1.33971e-13	2012.64	1894.03	1709.04	1247.14	1256.81	1339.04	1390.89	1204.86	1232.1	1390.88	1320.09	1331.06
231	Rpl7l1	4045.38	0.334414	0.0420902	7.94518	1.93907e-15	1.36793e-13	4770.2	4770.25	4818.6	3962.6	3878.47	3898.36	3569.99	3574.11	3923.06	3741.27	3792.49	3845.21
232	Atp6ap1	5521.14	0.405479	0.0511794	7.92271	2.32397e-15	1.63239e-13	6810	6642.06	6836.16	5070.9	5052.02	5118.65	5477.12	5257.47	5465.81	4943.97	4808.55	4770.92
233	C2cd5	848.227	-0.554661	0.0701722	-7.90428	2.69481e-15	1.88475e-13	635.316	623.011	626.98	850.27	845.472	917.437	899.842	951.949	879.51	934.651	1009.76	1004.53
234	Stambp	725.664	-0.52487	0.0665251	-7.88981	3.02639e-15	2.10761e-13	516.982	554.508	565.458	804.808	873.225	764.531	810.865	792.11	777.272	764.23	756.923	727.058
235	Sgk1	1426.29	-0.632536	0.080384	-7.86893	3.5769e-15	2.48039e-13	1040.75	1046.07	945.445	1553.09	1520.46	1301.93	1632.64	1546.79	1534.88	1774.33	1578.43	1640.71
236	Adck2	232.417	-0.841706	0.10714	-7.85613	3.96182e-15	2.73567e-13	133.853	142.561	160.138	264.174	217.067	282.06	262.734	264.037	271.324	236.991	270.161	283.907
237	1110038B12Rik	768.283	1.0651	0.135812	7.84249	4.4171e-15	3.03718e-13	1291.97	1264.54	1235.86	501.315	474.773	519.584	589.262	615.074	562.31	756.241	676.584	731.884
238	Xrn2	6166.29	0.37395	0.0477265	7.83528	4.6781e-15	3.18972e-13	7145.6	7455.77	7722.8	5584.51	5814.23	5837.16	5414.16	5649.98	5457.94	5767.67	6117.61	6027.99
239	Ighm	462.531	-1.05918	0.135177	-7.83551	4.66943e-15	3.18972e-13	265.766	292.528	206.279	629.102	616.511	593.81	501.125	535.155	509.88	425.164	482.037	493.016
240	Dstn	6656.06	0.891967	0.113869	7.8333	4.75229e-15	3.22681e-13	9342.53	10021.9	11164.4	4949.26	4868.65	4970.19	4970.12	5008.61	5336.04	6274.5	6394.07	6572.48
241	Dnal1	129.673	-0.986685	0.126137	-7.82235	5.18462e-15	3.50575e-13	73.716	72.2064	78.7117	131.472	145.703	146.968	154.451	152.757	146.803	137.579	170.131	145.573
242	Hacd1	201.443	1.31166	0.167946	7.81003	5.71763e-15	3.85018e-13	316.203	382.323	398.987	119.185	127.862	135.092	127.59	126.454	129.764	180.184	205.574	168.092
243	Ifi27l2a	1604.51	-0.754013	0.096729	-7.79511	6.43504e-15	4.31545e-13	1133.87	1076.62	968.968	1757.06	1805.92	1572.11	1699.79	1716.74	1723.63	2253.64	1804.49	1741.24
244	Gstm1	578.669	-0.603679	0.0775518	-7.7842	7.01578e-15	4.68562e-13	395.739	423.981	429.748	622.958	574.881	665.068	638.787	621.144	604.254	614.224	625.387	727.863
245	Hcn2	95.0908	-1.70518	0.219076	-7.78354	7.05209e-15	4.69065e-13	33.9482	41.6575	30.7609	127.786	84.2499	83.1334	110.801	98.1286	114.035	126.928	146.501	143.16
246	ENSMUSG00000116563.1	364.587	0.583325	0.0749875	7.77896	7.31227e-15	4.84393e-13	495.643	481.376	482.222	341.583	345.92	298.39	325.689	293.374	311.957	363.031	319.782	316.077
247	Adra1a	71.5817	2.0098	0.258841	7.76463	8.18844e-15	5.40238e-13	132.883	181.442	178.232	19.6594	37.6646	51.9584	21.8245	36.4189	43.2546	50.5936	52.772	52.2774
248	Rrp8	1063.32	0.344118	0.0443606	7.75729	8.67602e-15	5.70099e-13	1255.11	1231.21	1305.53	1007.55	1030.82	999.086	974.549	1012.65	996.166	954.178	992.428	1000.51
249	Tax1bp1	6036.87	-0.450754	0.0581917	-7.74603	9.48129e-15	6.20511e-13	4530.62	4638.8	5029.41	6608.02	6921.37	6849.6	6386.19	6314.63	6800.15	6048.16	6299.56	6015.93
250	Slc28a2	159.419	1.63538	0.212	7.71406	1.21875e-14	7.94432e-13	315.233	329.557	324.799	140.073	136.782	148.453	104.926	91.0472	94.3737	79.8847	80.3394	67.5585
251	Fbf1	306.391	-0.864072	0.112048	-7.71163	1.24219e-14	8.06485e-13	213.388	194.402	161.947	350.184	327.088	331.049	404.593	380.375	347.348	305.337	348.925	312.056
252	Xpot	4423.47	0.314762	0.0408219	7.71061	1.25214e-14	8.09714e-13	4971.95	5221.08	5369.59	3933.11	4195.64	4080.96	4085.38	4319.68	4086.9	4261.4	4297.37	4258.6
253	BC029722	1016.25	0.43258	0.0561115	7.70928	1.2653e-14	8.14993e-13	1239.59	1248.8	1295.58	962.083	934.678	954.55	878.857	847.75	918.833	963.942	991.641	958.688
254	Ttll5	399.849	-0.515055	0.066842	-7.70557	1.30261e-14	8.35721e-13	298.744	305.488	303.99	422.678	424.223	429.028	438.169	438.038	431.235	419.838	435.566	451.194
255	Cdc42bpg	485.879	-0.863842	0.112223	-7.69758	1.38666e-14	8.86157e-13	295.834	309.191	295.847	600.841	538.208	590.841	583.386	634.295	574.106	471.32	471.01	465.671
256	Tbc1d20	2882.91	0.344714	0.0448062	7.69344	1.43234e-14	9.11772e-13	3413.25	3469.61	3409.03	2560.64	2618.68	2575.65	2785.98	2693.98	2854.8	2844.78	2626.78	2741.75
257	Gm44597	899.417	-0.436792	0.0568552	-7.68253	1.55977e-14	9.89029e-13	717.761	697.995	714.739	1006.32	970.36	981.272	1003.93	940.821	968.641	991.457	887.672	912.04
258	Ptgs1	7019.79	-0.712497	0.092845	-7.67404	1.66658e-14	1.05266e-12	5017.54	4885.96	4339.1	7291.19	7366.41	6254.31	8415.03	8095.1	7515.81	8363.92	8092.23	8600.84
259	Terf1	996.067	-0.529348	0.0690837	-7.66242	1.82464e-14	1.14805e-12	739.1	767.424	732.833	1097.24	1189.41	1159.41	1061.01	1080.43	1118.07	973.705	1020	1014.18
260	Bin1	1707.18	-0.41862	0.05466	-7.65862	1.87936e-14	1.17793e-12	1326.89	1368.22	1396.91	1766.89	1686.98	1716.11	1858.44	1788.57	1857.33	1958.95	1901.37	1859.47
261	Ncoa2	1927.35	-0.783905	0.102405	-7.65496	1.93367e-14	1.20732e-12	1270.63	1314.53	1165.3	2222.74	2196.44	2154.05	2398.18	2494.69	2278.08	1751.25	1936.81	1945.52
262	Atf7ip	1189.83	-0.552666	0.0722578	-7.64853	2.03287e-14	1.26441e-12	880.712	930.351	830.544	1339.3	1340.07	1392.49	1322.9	1268.59	1330.41	1097.08	1257.08	1288.44
263	Ctsa	26609.6	0.440571	0.0577234	7.63246	2.3032e-14	1.42711e-12	33677.5	32090.2	33696.8	23257.1	22988.3	23137.8	24401.5	22894.3	24896.3	25850.7	26035.5	26388.8
264	Mrpl20	1080.15	0.526879	0.0691691	7.61726	2.59118e-14	1.59946e-12	1434.55	1353.41	1415.91	1028.43	1067.5	985.725	987.14	971.17	912.279	1036.73	898.699	870.218
265	Gm42418	473978	-1.06759	0.140275	-7.61069	2.7263e-14	1.67652e-12	243786	214126	322538	525149	490412	530504	591933	611936	422253	557361	502744	674995
266	Selenon	2756.49	-0.346296	0.0455389	-7.60441	2.86214e-14	1.75344e-12	2372.49	2261.54	2239.21	2974.72	3064.71	2911.16	2871.6	2762.78	2776.16	2998.34	2831.57	3013.59
267	Hpcal1	1089.04	-0.384567	0.0508294	-7.56582	3.85411e-14	2.34626e-12	922.42	865.551	867.638	1169.74	1151.75	1230.67	1144.11	1083.46	1177.05	1188.51	1127.11	1140.45
268	Fam84b	1038.23	0.433075	0.0572421	7.56567	3.8586e-14	2.34626e-12	1257.05	1296.01	1310.96	1014.92	941.616	929.313	901.521	962.065	1011.9	885.832	928.629	1019.01
269	Snx13	1251.46	-0.717201	0.0951794	-7.53526	4.87369e-14	2.95248e-12	785.657	889.619	854.972	1395.82	1417.38	1393.97	1543.67	1578.15	1470.66	1179.63	1283.07	1224.9
270	Dag1	4436.67	0.321582	0.042751	7.52222	5.38532e-14	3.25034e-12	5374.48	5189.6	5088.21	4129.71	3991.46	4334.82	4225.56	4099.15	4411.97	3935.65	4261.14	4198.28
271	Bard1	1044.47	-0.633221	0.0842393	-7.51693	5.60757e-14	3.37199e-12	734.25	757.241	724.691	1216.43	1228.07	1151.99	1170.97	1271.63	1120.69	936.426	1111.36	1109.89
272	Fcgr2b	7194.9	-0.703898	0.09367	-7.51466	5.706e-14	3.41857e-12	4584.94	5160.9	4923.55	7474.27	7208.82	6834.76	8143.91	7559.95	7650.82	9023.42	9184.69	8588.78
273	Ing4	900.448	-0.433604	0.0578342	-7.49736	6.51142e-14	3.88682e-12	717.761	696.143	722.881	1003.86	970.36	981.272	1009.8	936.774	972.573	995.008	886.097	912.844
274	Grpel1	1238.78	0.367006	0.0490626	7.48035	7.41241e-14	4.40849e-12	1515.06	1458.94	1491	1137.79	1202.3	1217.31	1134.88	1112.8	1175.74	1212.47	1099.55	1107.48
275	Ptms	5704.66	-0.362701	0.0485231	-7.47481	7.73168e-14	4.58165e-12	4673.21	4660.09	4762.51	6007.18	5534.72	5682.76	6418.09	6179.07	6191.96	6065.02	6242.85	6038.44
276	Tmem123	4860.65	0.348843	0.0467301	7.46506	8.32589e-14	4.91589e-12	5422.01	5721.89	6238.13	4486.04	4343.33	4535.23	4459.76	4542.24	4613.82	4583.6	4763.66	4618.11
277	Scamp3	975.411	0.395298	0.0530501	7.4514	9.23517e-14	5.43308e-12	1244.44	1156.23	1164.39	954.711	875.208	923.375	905.718	831.564	945.047	884.945	912.089	907.214
278	Pacs2	1712.87	-0.486998	0.0654203	-7.44414	9.75755e-14	5.71975e-12	1347.26	1329.34	1272.05	1832.01	1785.11	1776.98	1987.71	1997.98	1994.95	1706.87	1721	1803.17
279	Rab19	112.604	-2.3529	0.316651	-7.43058	1.08119e-13	6.29535e-12	23.2787	30.5488	28.9514	157.275	168.5	163.298	85.6193	74.861	82.577	181.96	166.98	187.394
280	Evi2	4918.64	0.354218	0.0476707	7.43052	1.08168e-13	6.29535e-12	5468.56	6076.44	6089.75	4717.03	4575.26	4649.53	4711.58	4582.71	4463.09	4309.33	4830.6	4549.74
281	Tecpr2	377.346	-0.651961	0.0877756	-7.4276	1.10589e-13	6.41338e-12	269.645	265.682	258.753	346.497	407.373	396.368	400.396	417.805	446.964	424.276	455.257	439.13
282	Mrpl34	485.796	0.497727	0.0670539	7.42278	1.14683e-13	6.62724e-12	653.745	608.2	605.266	448.481	464.861	452.78	421.381	415.782	402.399	448.242	476.523	431.892
283	Fam117b	899.637	-0.564335	0.0761573	-7.41012	1.26183e-13	7.26599e-12	629.496	648.932	708.405	908.02	954.502	881.808	1055.13	1063.23	1049.91	938.201	932.567	1025.44
284	Zranb3	1487.8	0.739503	0.100118	7.38631	1.50965e-13	8.66241e-12	2171.71	2143.05	2073.65	1228.71	1203.29	1105.97	1152.5	1193.73	1207.2	1440.59	1558.74	1374.49
285	Rin3	860.515	-0.597586	0.081017	-7.37605	1.63054e-13	9.32326e-12	691.573	606.348	567.267	1000.17	946.572	959.004	919.148	809.308	899.171	931.988	979.038	1016.59
286	Rgl1	377.817	-1.03204	0.139972	-7.37314	1.66654e-13	9.49577e-12	180.41	247.168	207.184	479.199	420.258	423.09	517.913	479.515	457.45	340.841	426.902	353.878
287	Baz2a	2116.86	-0.411251	0.0558243	-7.36687	1.74679e-13	9.91834e-12	1790.52	1730.18	1575.14	2247.32	2172.66	2167.41	2251.28	2282.25	2126.03	2273.16	2432.24	2354.09
288	Atrn	3363.32	0.526388	0.0715117	7.36086	1.8273e-13	1.03395e-11	4429.75	4184.27	4480.23	2870.28	2631.57	2914.12	3050.4	2972.18	3186.42	3203.37	3018.24	3418.94
289	ENSMUSG00000116930.1	159.293	0.812082	0.110385	7.35681	1.88355e-13	1.06209e-11	233.757	224.025	243.373	127.786	128.853	160.329	128.429	140.617	162.532	119.827	118.934	123.053
290	Ctsh	224.862	-3.50138	0.476012	-7.35564	1.90015e-13	1.06775e-11	36.858	24.0688	16.2852	282.604	257.705	267.215	460.833	425.898	491.53	157.994	119.721	157.637
291	Fbxw4	386.798	-0.772534	0.105072	-7.35242	1.94655e-13	1.09007e-11	251.216	270.311	236.135	457.082	449.002	491.378	481.818	418.817	343.415	413.625	400.909	427.871
292	Dctn1	3633.1	-0.435365	0.0593437	-7.33632	2.1954e-13	1.22521e-11	3066	2902.14	2654.48	3817.61	3883.42	3766.24	4205.42	4043.51	4047.58	3593.03	3863.38	3754.32
293	Elk3	1089.44	-0.507217	0.0692354	-7.32598	2.37155e-13	1.319e-11	804.086	854.442	827.83	1167.28	1106.15	1019.87	1227.21	1156.3	1242.59	1161.88	1277.55	1228.12
294	Zmat3	1704.4	0.763416	0.104313	7.31854	2.50682e-13	1.38949e-11	2493.73	2644.79	2247.36	1641.56	1596.78	1667.12	1435.38	1453.72	1479.83	1199.16	1275.19	1318.2
295	Dgkg	171.082	-0.846015	0.115718	-7.31099	2.65182e-13	1.46488e-11	118.334	105.532	96.8064	210.11	198.235	209.318	183.83	172.99	193.99	165.095	198.486	200.263
296	Carf	96.8035	-1.20092	0.164537	-7.29877	2.90418e-13	1.59887e-11	48.4974	51.8405	47.0461	122.871	95.1528	108.37	116.677	109.257	111.413	93.1988	116.571	140.747
297	Snta1	95.8864	-9.53971	1.30889	-7.28841	3.13638e-13	1.72089e-11	0	0	0	119.185	117.95	117.278	232.515	195.246	214.962	45.268	54.3473	53.886
298	Msh2	1528.49	0.318978	0.0438189	7.27947	3.35122e-13	1.8326e-11	1781.79	1780.16	1823.94	1426.54	1472.89	1505.31	1379.98	1367.73	1406.43	1441.47	1451.62	1503.98
299	Elmsan1	1600.91	-0.499152	0.068607	-7.27552	3.45081e-13	1.88075e-11	1255.11	1246.95	1163.49	1743.55	1738.52	1695.33	1838.3	1867.48	1803.59	1502.72	1728.09	1627.84
300	Tia1	1133.67	-0.528328	0.0726903	-7.2682	3.64304e-13	1.9789e-11	781.778	891.471	883.019	1150.08	1195.36	1200.98	1260.79	1328.28	1083.99	1226.67	1301.18	1300.5
301	Pxdc1	230.341	-0.915889	0.126055	-7.26581	3.708e-13	2.00749e-11	151.312	129.601	135.71	233.456	220.041	219.71	269.449	285.281	260.838	303.562	257.559	297.579
302	Mapre1	7980.03	0.278791	0.0383876	7.26254	3.7989e-13	2.0499e-11	8739.23	9271.11	9559.4	7573.79	7780.72	7666.09	7542.05	7621.66	7683.59	7154.12	7423.52	7745.1
303	Cep83os	103.247	-1.40014	0.193553	-7.23389	4.6936e-13	2.52432e-11	36.858	55.5434	46.1414	95.8397	123.897	126.185	154.451	138.594	146.803	102.962	106.332	105.359
304	Washc1	869.592	0.367045	0.0507772	7.22855	4.88196e-13	2.61699e-11	1085.37	1038.66	1016.01	819.552	771.134	766.015	795.756	806.273	836.256	850.328	829.386	820.353
305	Eya4	170.22	-0.749581	0.103759	-7.22428	5.03766e-13	2.6916e-11	115.424	112.938	109.473	199.052	172.464	203.38	193.903	185.129	179.572	182.847	190.609	197.85
306	Tmcc3	200.952	-1.37578	0.190714	-7.2138	5.44099e-13	2.89759e-11	92.145	87.0179	95.9016	211.339	211.12	234.555	169.56	214.467	197.923	275.158	317.419	304.818
307	Dhx58	322.112	-1.056	0.146399	-7.21315	5.4673e-13	2.90212e-11	157.131	193.476	183.661	358.785	346.911	402.306	301.346	295.397	327.686	436.703	430.052	431.892
308	Ctsz	24817.7	0.474073	0.0657598	7.20917	5.62956e-13	2.97855e-11	31226.5	30776.6	32251	21748.2	21347.9	22935.9	21397.3	20757.7	21692.8	24451.8	24366.5	24859.9
309	Gpx1	9921.26	0.894465	0.124109	7.20709	5.71584e-13	3.01441e-11	14989.6	14482.9	16078	7702.81	7130.51	8016.44	7025.82	6824.49	7684.9	9934.1	9386.32	9799.2
310	Nfix	583.456	-1.55135	0.215303	-7.20543	5.78621e-13	3.03258e-11	246.367	259.202	208.993	761.803	857.366	752.655	872.142	824.483	795.622	441.141	471.797	509.906
311	Cebpz	2697.67	0.360391	0.0500169	7.2054	5.78751e-13	3.03258e-11	3212.47	3204.85	3284.18	2612.25	2618.68	2556.35	2388.11	2349.02	2435.36	2440.92	2578.74	2691.08
312	Mfsd9	118.793	-0.958329	0.133244	-7.19229	6.37142e-13	3.32784e-11	66.9264	79.6122	61.5218	143.76	118.941	155.875	139.341	125.443	135.007	126.04	133.111	139.943
313	Wdr4	570.77	0.515536	0.0716942	7.19076	6.44327e-13	3.35462e-11	778.868	710.955	721.072	508.688	483.693	498.801	542.256	582.702	519.055	515.7	466.284	521.166
314	Gm45234	2072.62	-0.589755	0.0820767	-7.18542	6.70032e-13	3.47734e-11	1650.85	1442.28	1419.53	2146.56	1957.57	2054.58	2427.56	2337.89	2318.71	2248.31	2470.04	2397.52
315	Tmsb4x	49592.1	0.991112	0.138003	7.18179	6.88054e-13	3.55953e-11	79449.4	75430.7	82286.3	35664.7	39111.8	35726.6	34304	33566.1	35202.7	54428.1	45350	44585.4
316	Eif2b2	900.897	-0.363681	0.050644	-7.18112	6.91424e-13	3.56565e-11	737.16	720.212	766.308	936.28	954.502	988.694	960.279	907.437	947.669	1002.11	948.32	941.798
317	Sp4	164.479	-0.985922	0.137403	-7.17541	7.20916e-13	3.70601e-11	72.7461	94.4237	115.806	195.366	169.491	197.442	184.669	175.013	218.894	173.083	170.918	205.893
318	Shq1	380.939	-0.55612	0.0775348	-7.17252	7.36289e-13	3.77313e-11	268.675	307.34	266.896	403.018	418.276	434.966	388.644	432.98	433.857	428.714	394.608	393.287
319	Oser1	1440.17	0.30427	0.0424675	7.16477	7.79183e-13	3.98043e-11	1671.22	1657.04	1708.13	1389.68	1357.91	1405.85	1348.92	1356.6	1348.76	1283.48	1417.75	1336.69
320	Gabpb1	1010.55	-0.399899	0.0558474	-7.16058	8.03369e-13	4.09116e-11	784.688	834.076	824.211	1078.81	1046.68	1157.93	1075.28	1080.43	1076.12	981.694	1071.19	1115.52
321	Eya3	1814.5	0.362694	0.0507281	7.14977	8.69244e-13	4.41284e-11	2187.23	2266.17	2075.46	1765.66	1683.02	1736.9	1798.84	1708.65	1707.9	1629.65	1605.21	1609.34
322	Ptpra	8440.99	0.351477	0.0492203	7.14089	9.27318e-13	4.69304e-11	9912.86	9671.02	10632.4	8336.83	8165.3	8362.33	7710.77	7771.38	7926.08	7728.4	7692.11	7382.38
323	Rab12	1570.51	0.435101	0.0610093	7.13171	9.91331e-13	5.00146e-11	1881.7	1932.91	2040.17	1430.22	1396.57	1472.65	1296.04	1402.13	1453.62	1436.15	1583.95	1520.07
324	Fth1	59266.1	-0.523412	0.0734064	-7.13033	1.00132e-12	5.03625e-11	43346	44855.9	45677.2	68988.6	70723.3	72104.9	62022.8	60274.2	63972.2	58864.3	60933.5	59430.6
325	Abcd1	1438.19	0.364609	0.0512091	7.12	1.07924e-12	5.41147e-11	1771.12	1678.34	1728.04	1385.99	1334.12	1426.63	1421.11	1334.35	1347.45	1291.47	1268.89	1270.74
326	Art3	89.0768	-8.46575	1.19086	-7.10891	1.16959e-12	5.84651e-11	0	0.925723	0	144.988	154.623	143.999	90.6557	94.0821	103.549	111.839	120.509	103.751
327	Gm28875	244.973	-1.33858	0.188373	-7.10604	1.19423e-12	5.95145e-11	115.424	127.75	98.6158	314.551	294.379	299.874	339.959	368.235	330.308	211.251	218.964	220.369
328	Zfp948	354.517	0.540767	0.0762799	7.08925	1.34844e-12	6.69944e-11	463.635	435.09	491.27	301.035	328.079	308.781	301.346	342.944	325.065	289.36	340.261	327.337
329	D8Ertd738e	1259.68	0.397285	0.0560639	7.08628	1.37761e-12	6.82356e-11	1592.65	1483.01	1537.14	1184.48	1080.38	1187.62	1147.47	1093.58	1163.94	1219.57	1263.38	1162.97
330	Iqsec1	2457.9	-0.460878	0.065114	-7.07802	1.4623e-12	7.22108e-11	1999.06	2023.63	1727.13	2668.77	2427.39	2609.8	2731.42	2680.83	2887.57	2494.18	2570.07	2675
331	Ifi211	385.233	-0.759506	0.107594	-7.05898	1.67732e-12	8.25787e-11	264.796	245.317	250.611	466.911	487.658	362.224	418.863	465.352	435.167	455.343	415.875	354.682
332	BC021767	63.5629	-2.55945	0.363451	-7.04209	1.8938e-12	9.29559e-11	13.5793	12.9601	14.4757	74.9516	63.4352	78.6799	59.5977	52.605	44.5653	94.974	133.899	119.032
333	Fbxo18	1215.73	-0.339705	0.0482653	-7.03827	1.94634e-12	9.52481e-11	981.587	992.375	1069.39	1293.84	1299.43	1241.06	1262.46	1232.17	1260.94	1320.76	1337.42	1297.28
334	Agpat5	2064.77	0.518453	0.0736688	7.03761	1.95559e-12	9.54142e-11	2580.06	2635.53	2785.67	2018.78	1987.31	1971.45	1879.43	1924.13	1933.35	1674.03	1642.23	1745.26
335	Farsa	1458.19	0.378433	0.0537898	7.03542	1.98664e-12	9.66398e-11	1864.24	1663.52	1756.99	1464.63	1369.8	1407.33	1324.58	1313.1	1386.77	1349.16	1279.92	1318.2
336	AI597479	594.067	-0.522386	0.0743445	-7.02655	2.11697e-12	1.02673e-10	431.627	423.055	485.841	648.761	663.096	669.521	680.757	659.586	664.548	582.27	587.58	632.155
337	Col27a1	78.0138	-1.79687	0.25587	-7.02257	2.17819e-12	1.05329e-10	35.8881	22.2173	23.523	113.042	93.1704	123.216	109.123	107.233	96.9952	84.3227	59.0731	68.3628
338	Trappc12	635.192	-0.55438	0.0789927	-7.01812	2.24874e-12	1.08418e-10	496.613	449.901	462.318	763.031	732.478	682.882	719.37	658.574	719.599	613.337	630.113	694.083
339	Ndufa13	1034.22	0.355538	0.0506805	7.01529	2.29478e-12	1.10312e-10	1226.98	1244.17	1242.2	978.056	953.51	939.705	987.98	922.611	942.426	1043.83	1001.88	927.321
340	Fam32a	2057.68	0.340734	0.048603	7.01057	2.37356e-12	1.13763e-10	2441.36	2350.41	2539.58	1897.13	1872.33	1904.65	1937.35	1815.88	1953.01	2099.19	1949.41	1931.85
341	Sac3d1	211.304	0.739258	0.10546	7.00985	2.38582e-12	1.14015e-10	348.211	298.083	262.372	173.249	158.588	175.174	184.669	170.966	182.194	197.936	201.636	182.569
342	Map3k5	280.761	-0.981998	0.140114	-7.00856	2.40781e-12	1.1473e-10	169.741	170.333	146.567	285.062	308.255	286.513	400.396	373.293	373.562	290.248	278.037	287.124
343	Eogt	853.831	-0.466724	0.0666251	-7.00523	2.4658e-12	1.17151e-10	648.895	643.377	700.263	887.132	905.934	921.891	869.623	885.181	883.442	908.91	954.621	1036.7
344	Fnbp1l	1652.18	1.03953	0.14841	7.00445	2.47964e-12	1.17466e-10	2607.22	2656.82	2792.91	1452.34	1384.67	1508.28	1468.12	1415.28	1520.46	982.581	1015.27	1022.22
345	Plcb2	599.416	-1.62134	0.231569	-7.00155	2.53138e-12	1.19569e-10	247.337	200.882	254.23	1025.98	961.44	996.117	629.554	637.33	655.373	479.308	515.117	590.333
346	St18	47.9958	1.68615	0.240928	6.99853	2.58653e-12	1.21821e-10	90.2051	87.0179	117.615	47.9199	28.7441	50.4739	20.9851	25.2909	28.8364	23.9654	28.3551	26.5408
347	Ifnar1	2417.62	0.364948	0.0521682	6.9956	2.64125e-12	1.2404e-10	2856.5	2924.36	2939.48	2172.37	2115.17	2188.19	2267.23	2270.11	2122.1	2356.6	2386.55	2412.8
348	Vamp1	315.738	-0.861528	0.12323	-6.99122	2.72502e-12	1.27606e-10	209.509	180.516	199.041	329.295	294.379	331.049	354.229	329.793	330.308	395.873	417.45	417.415
349	Cmtm4	1873.84	0.41563	0.0594702	6.98888	2.77085e-12	1.29381e-10	2259.01	2355.04	2311.59	1625.59	1582.91	1681.97	1702.31	1763.28	1692.17	1776.99	1821.03	1914.16
350	St14	1100.77	-0.515333	0.0737701	-6.98565	2.83535e-12	1.32014e-10	868.103	838.705	788.927	1299.98	1289.52	1247	1180.2	1122.91	1196.71	1192.94	1038.9	1145.28
351	Kdm7a	2091.67	-0.609993	0.0873279	-6.98509	2.84681e-12	1.3217e-10	1457.83	1443.2	1599.57	2013.86	1959.55	2217.88	2404.06	2221.55	2390.8	2472.87	2326.69	2592.16
352	Rexo2	1205.21	0.402603	0.0576792	6.98003	2.95116e-12	1.36625e-10	1392.84	1466.34	1558.85	1124.27	1185.45	1229.19	1083.67	1063.23	1095.78	1092.64	1087.73	1082.54
353	ENSMUSG00000115423.2	587.774	0.529078	0.075814	6.97862	2.98085e-12	1.37609e-10	768.198	765.573	758.166	561.522	571.908	503.254	516.234	481.538	499.394	608.899	514.33	504.276
354	Rnf128	1065.93	1.33665	0.191611	6.97582	3.04082e-12	1.39981e-10	1681.89	1817.19	2348.69	761.803	691.84	810.551	559.044	543.248	656.683	960.391	920.753	1039.11
355	Krcc1	1261.26	-0.617848	0.0886443	-6.96997	3.17015e-12	1.45523e-10	812.816	933.128	951.778	1437.6	1452.07	1448.9	1406	1406.17	1559.79	1264.84	1287.79	1174.23
356	Cd1d1	91.2226	-1.53715	0.220788	-6.96209	3.3527e-12	1.53471e-10	30.0684	39.8061	43.4272	76.1803	91.1881	80.1644	138.502	135.559	102.238	124.265	112.633	120.64
357	Gstk1	128.48	-1.02148	0.146761	-6.96019	3.39808e-12	1.55112e-10	77.5958	69.4292	69.6644	167.105	163.544	138.061	149.414	152.757	167.775	143.792	126.81	115.815
358	Guf1	993.922	0.516657	0.0742394	6.95934	3.41881e-12	1.55623e-10	1169.76	1293.23	1386.95	911.706	849.437	957.519	793.238	868.995	861.16	940.864	945.17	949.036
359	Spns1	1122.63	0.407321	0.0586068	6.95007	3.65101e-12	1.65729e-10	1484.99	1339.52	1305.53	1030.89	946.572	1042.14	1031.63	1119.88	1052.53	1050.04	1025.51	1042.33
360	Rnasek	1468.25	0.306857	0.0441787	6.94581	3.763e-12	1.70339e-10	1757.54	1717.22	1672.85	1334.38	1359.89	1389.52	1385.86	1328.28	1377.59	1475.2	1406.73	1413.9
361	Cited2	1431.06	-0.454101	0.0654305	-6.9402	3.91539e-12	1.76746e-10	1090.22	1153.45	1114.63	1464.63	1501.63	1600.32	1666.22	1607.49	1643.67	1490.29	1435.87	1404.25
362	Rubcn	613.883	-0.650893	0.0938895	-6.93254	4.13354e-12	1.86078e-10	463.635	430.461	396.273	697.91	657.149	639.831	789.88	747.598	680.277	636.414	616.723	610.439
363	Nsd1	1113.68	-0.959462	0.138515	-6.92679	4.30493e-12	1.93259e-10	666.354	663.743	625.17	1179.57	1194.37	1138.63	1503.37	1515.43	1603.04	1013.65	1143.66	1117.13
364	Cct7	10158.9	-0.258886	0.0373824	-6.92534	4.34926e-12	1.94713e-10	8885.69	8700.87	8975.85	10501.8	10875.2	10788	10140	10094.1	10302.5	10922.9	10800.9	10918.7
365	Samhd1	4989.54	0.469099	0.0677427	6.92471	4.36857e-12	1.95042e-10	6205.72	6385.64	6316.84	4581.87	4606.98	4315.52	4140.78	4167.94	4430.32	4683.9	5098.4	4940.62
366	Kcnj10	717.346	-1.06016	0.153166	-6.92164	4.46454e-12	1.98782e-10	382.159	419.352	383.607	944.881	915.846	988.694	951.046	818.413	870.335	607.123	663.982	662.717
367	Sept9	2661.63	-0.503864	0.0729101	-6.91076	4.82073e-12	2.14056e-10	2051.44	2061.58	1964.17	2915.74	3079.58	2928.97	3028.57	2972.18	3054.04	2429.38	2771.71	2682.23
368	Xpo5	3001.55	0.363837	0.0526643	6.90861	4.89432e-12	2.16733e-10	3647	3639.94	3530.27	2801.47	2872.43	2712.23	2645.8	2633.29	2700.14	2822.59	3015.09	2998.31
369	Dis3l2	565.728	-0.493891	0.0715773	-6.90011	5.19617e-12	2.29476e-10	431.627	451.753	416.177	605.756	685.893	626.47	625.357	601.923	560.999	605.348	610.422	567.009
370	Fam83h	312.544	-0.615066	0.0892045	-6.89501	5.38607e-12	2.3722e-10	216.298	230.505	222.564	371.072	342.947	311.75	360.105	318.665	393.224	327.527	324.508	331.358
371	Adi1	563.279	-0.828297	0.120162	-6.89317	5.45628e-12	2.39665e-10	388.949	334.186	343.798	645.075	706.708	739.294	693.348	623.167	671.102	504.161	548.986	560.575
372	Fcgr4	1053.18	-0.582968	0.0847105	-6.88188	5.90677e-12	2.58754e-10	730.37	750.761	818.783	1261.89	1184.45	1184.65	1016.52	1002.53	1076.12	1174.3	1178.31	1259.48
373	Rtn4	13436.7	0.38017	0.0553267	6.87137	6.35891e-12	2.77814e-10	15511.4	15839.1	17428.8	12852.3	12663.3	12838.2	12640.6	12570.6	13340.8	12295.1	11371.2	11889.5
374	Atn1	1632.24	-0.5898	0.0858641	-6.86899	6.46596e-12	2.81736e-10	1304.58	1197.89	1050.39	1750.92	1594.8	1698.3	1914.68	1880.63	1875.68	1579.05	1937.6	1802.36
375	Zfand4	266.869	-0.853441	0.124451	-6.85763	7.00124e-12	3.04246e-10	157.131	163.853	177.328	271.546	341.955	362.224	317.295	297.421	254.285	249.418	289.064	320.903
376	Irgm2	208.706	-0.827109	0.120628	-6.85667	7.04848e-12	3.05484e-10	136.763	137.933	120.329	253.115	270.591	239.009	225.8	244.816	252.974	190.836	208.725	223.587
377	Pqlc3	1094.92	-0.398503	0.0581656	-6.85117	7.32474e-12	3.16615e-10	886.532	863.699	897.495	1189.4	1152.74	1218.8	1209.58	1138.09	1270.11	1111.28	1101.12	1100.24
378	Ino80d	2074.56	-0.510089	0.0744656	-6.84999	7.38549e-12	3.18396e-10	1589.74	1605.2	1526.28	2212.91	2108.23	2225.3	2412.45	2479.52	2363.27	1915.46	2175.47	2280.9
379	Ext1	798.223	-0.477586	0.0697265	-6.84942	7.41502e-12	3.18826e-10	633.376	606.348	608.885	862.557	862.322	849.149	884.733	957.007	910.968	788.195	792.367	822.766
380	Igf1r	939.258	-0.44496	0.0650016	-6.84538	7.62743e-12	3.27096e-10	711.941	795.196	710.215	971.913	995.14	1052.53	1045.06	996.461	979.127	908.022	1032.6	1072.89
381	Gm14326	428.981	0.713436	0.104241	6.84407	7.69766e-12	3.29242e-10	525.712	647.08	647.788	357.556	337.991	362.224	354.229	350.026	349.969	455.343	351.288	408.568
382	Slc29a3	501.363	-0.707737	0.103422	-6.84322	7.74333e-12	3.30328e-10	294.864	409.169	314.847	548.007	623.449	592.326	538.059	532.12	553.135	484.634	582.067	543.685
383	Timm8a1	487.373	0.42321	0.0618578	6.84166	7.82804e-12	3.3307e-10	605.247	610.977	587.171	464.454	478.738	463.172	441.527	435.003	457.45	458.005	426.902	419.828
384	Fam19a5	34.6622	-3.46546	0.506757	-6.8385	8.00287e-12	3.39622e-10	5.81968	4.62861	1.80946	38.0901	41.6293	37.1131	74.707	58.6748	60.2943	39.9423	30.718	22.5195
385	Cstb	3043.12	0.745164	0.109053	6.83306	8.31243e-12	3.51842e-10	4291.05	4074.11	4724.51	2484.46	2575.07	2856.23	2258	2148.71	2458.96	3201.6	2635.45	2809.31
386	N4bp2	656.89	-0.579807	0.0848921	-6.82993	8.49588e-12	3.58676e-10	456.845	535.993	444.224	662.277	673.999	708.119	777.289	776.936	783.826	661.267	682.885	719.016
387	Ttc8	190.296	-0.806903	0.118277	-6.82214	8.96938e-12	3.77687e-10	110.574	133.304	120.329	235.913	232.926	233.071	220.763	214.467	203.166	175.746	211.876	191.416
388	Ccdc88b	1466.98	-0.44877	0.0658313	-6.81697	9.29802e-12	3.90517e-10	1235.71	1097.91	1121.87	1565.38	1540.29	1548.36	1701.47	1707.64	1613.53	1429.05	1524.09	1518.46
389	Lrrc61	276.89	-0.860986	0.12631	-6.81643	9.3332e-12	3.90987e-10	191.08	181.442	143.852	269.088	300.326	280.575	353.389	262.013	361.766	334.628	328.446	316.077
390	Rps6ka5	669.173	-0.568104	0.0834848	-6.80487	1.01138e-11	4.22599e-10	525.712	486.004	464.128	679.479	697.787	635.377	808.347	764.796	807.419	708.311	752.198	700.518
391	Arhgap10	2488.68	0.344701	0.0507375	6.79381	1.09213e-11	4.55176e-10	3000.05	2870.67	3017.28	2333.33	2338.18	2208.97	2276.47	2196.26	2268.9	2371.69	2515.73	2466.69
392	Ccdc91	253.79	-1.14013	0.168067	-6.78376	1.17086e-11	4.85504e-10	130.943	134.23	133.9	298.578	340.964	354.802	346.674	295.397	311.957	270.72	216.601	210.718
393	Trappc6b	957.136	-0.505006	0.0744396	-6.78411	1.16803e-11	4.85504e-10	683.813	757.241	740.976	1066.52	1042.72	1070.34	1108.85	1112.8	1060.39	974.593	920.753	946.624
394	Mir7657	74.6373	1.27755	0.188476	6.77832	1.21584e-11	5.02877e-10	138.702	118.493	140.234	58.9783	41.6293	57.8965	54.5613	62.7214	86.5092	44.3804	44.8956	46.6475
395	Hn1l	4846.71	0.407356	0.0601139	6.7764	1.23206e-11	5.08295e-10	6069.93	5807.98	5945.9	4651.91	4742.77	4646.57	4570.56	4546.29	4747.52	4001.33	4179.23	4250.56
396	Fcrl1	558.13	0.523604	0.077301	6.77357	1.25645e-11	5.17049e-10	748.799	670.223	750.928	565.208	507.482	491.378	460.833	461.306	475.801	527.239	493.064	545.294
397	Zhx2	148.038	-0.794027	0.117252	-6.77196	1.27047e-11	5.20656e-10	102.814	90.7208	94.0922	173.249	156.606	143.999	163.684	149.722	171.708	167.758	181.945	180.156
398	Tsr2	356.525	0.850866	0.125648	6.77183	1.27161e-11	5.20656e-10	562.57	560.988	485.841	254.344	273.564	265.73	266.091	251.897	311.957	350.605	351.288	343.422
399	Syne2	491.633	-1.07923	0.159408	-6.77021	1.28592e-11	5.25198e-10	277.405	276.791	249.706	570.123	483.693	510.677	722.728	731.412	629.158	426.052	512.755	509.102
400	Ncs1	51.4156	-8.63839	1.27687	-6.76526	1.33069e-11	5.42124e-10	0	0	0	65.1218	69.3822	65.3191	109.962	119.373	111.413	23.0778	25.9922	27.3451
401	Eapp	890.075	-0.498672	0.0737291	-6.76357	1.34636e-11	5.47138e-10	668.294	673	698.453	910.477	1043.71	924.86	904.878	865.96	985.681	1046.49	1033.39	925.713
402	Ust	604.346	1.00454	0.148572	6.76131	1.36753e-11	5.54359e-10	1018.44	913.688	969.873	539.406	530.279	583.419	500.285	539.201	534.784	372.795	362.315	387.657
403	Pea15a	6886.85	0.352704	0.0522073	6.75583	1.42015e-11	5.74262e-10	8592.76	7801.07	8280.11	6158.32	6260.26	6220.16	6703.49	6750.64	6950.88	6532.79	6153.05	6238.71
404	Gm14085	50.5334	1.6612	0.246228	6.7466	1.51349e-11	6.10492e-10	96.9947	120.344	91.378	45.4624	43.6117	46.0203	35.255	28.3258	31.4579	21.3026	18.9034	27.3451
405	Tmem143	210.202	-0.695227	0.10323	-6.73472	1.6425e-11	6.60895e-10	150.342	135.156	142.948	233.456	228.961	283.544	228.318	226.606	238.556	217.464	211.876	225.195
406	Phc1	292.013	-0.612857	0.0910361	-6.73202	1.67318e-11	6.7158e-10	225.998	198.105	204.47	315.78	300.326	271.668	314.777	317.653	357.833	332.853	325.296	339.401
407	Plek	17173.3	-0.512648	0.0761659	-6.73068	1.68875e-11	6.76162e-10	11855.7	12853.7	14317.4	20214.8	20136.7	19935.7	18751.5	18047.6	18360.9	17010.1	17472.2	17122.9
408	Arel1	1355.23	-0.586564	0.0871902	-6.72741	1.72715e-11	6.89844e-10	985.467	1008.11	958.112	1526.06	1502.62	1606.26	1609.98	1571.07	1574.21	1263.95	1315.36	1341.52
409	Dusp16	1890.72	-0.350593	0.0521438	-6.72358	1.77312e-11	7.06475e-10	1584.89	1479.3	1637.57	2006.49	1988.3	2099.12	1946.58	1846.23	1933.35	2061.91	2023.45	2081.45
410	Pram1	224.118	-1.36732	0.203713	-6.71201	1.91957e-11	7.6296e-10	101.844	103.681	101.33	297.349	332.044	331.049	275.325	270.107	298.85	161.545	205.574	210.718
411	Suclg2	2450.39	-0.343347	0.0512074	-6.70503	2.01366e-11	7.9841e-10	2039.8	2022.7	2051.93	2588.9	2822.87	2718.17	2524.93	2557.41	2629.36	2406.3	2497.61	2544.7
412	Myd88	1487.33	0.302933	0.0451943	6.70291	2.0431e-11	8.08115e-10	1801.19	1684.82	1714.47	1405.65	1382.69	1373.19	1383.34	1374.81	1498.18	1366.92	1392.55	1470.2
[truncated: 23,220 more rows]

## Sheet: mIFNG KO2 vs mIFNG WT1,2,3
Column1	gene	baseMean	log2FoldChange	lfcSE	stat	pvalue	padj	WT1 +mIFNG R1	WT1 +mIFNG R2	WT1 +mIFNG R3	KO2 +mIFNG R1	KO2 +mIFNG R2	KO2 +mIFNG R3	WT2 +mIFNG R1	WT2 +mIFNG R2	WT2 +mIFNG R3	WT3 +mIFNG R1	WT3 +mIFNG R2	WT3 +mIFNG R3
[truncated: 23,776 more rows]

[truncated: 11 more sheets: mIFNG KO1 vs mIFNG WT1,2,3, UT KO1,2 vs mIFNG KO1,2, UT WT1,2,3 vs mIFNG WT1,2,3, UT KO1 vs mIFNG KO1, UT KO2 vs mIFNG KO2, mIFNG KO1,2 vs mIFNG WT1,2,3, UT KO1,2 vs UT WT1,2,3, UT WT1 vs mIFNG WT1, UT WT2 vs mIFNG WT2, UT WT3 vs mIFNG WT3, UT vs mIFNG - all samples]
