# Supplementary material for: Mouse B2 SINE elements function as IFN-inducible enhancers
Source: eLife. 2023 May 9;12:e82617. doi: 10.7554/eLife.82617 (PMC10229128; doi:10.7554/eLife.82617)
Supplement: Supplementary file 9. [file elife-82617-supp9.xlsx]

## Sheet: Description
Supplemental Table S9
DESeq2 transcript-level results for IFNG-stimulated WT and B2_Mm2.Dicer1 KO J774A.1 cells.
Sheets
WT IFNG vs UT	DESeq2 output for untreated WT1, WT2, and WT3 vs IFNG-stimulated WT1, WT2, and WT3
KO IFNG vs UT	DESeq2 output for untreated KO1 and KO2 vs IFNG-stimulated KO1 and KO2
KO vs WT UT	DESeq2 output for untreated KO1 and KO2 vs untreated WT2, WT2, and WT3
KO vs WT IFNG	DESeq2 output for IFNG-stimualted KO1 and KO2 vs IFNG-stimulated WT1, WT2, and WT3
Interaction	DESeq2 output for interaction term (effect of genotype & treatment)

## Sheet: WT IFNG vs UT
transcript	baseMean	log2FoldChange	lfcSE	stat	pvalue	padj	WT1_UT_R1	WT1_UT_R2	WT1_UT_R3	WT2_UT_R1	WT2_UT_R2	WT2_UT_R3	WT3_UT_R1	WT3_UT_R2	WT3_UT_R3	WT1_mIFNG_4h_R1	WT1_mIFNG_4h_R2	WT1_mIFNG_4h_R3	WT2_mIFNG_4h_R1	WT2_mIFNG_4h_R2	WT2_mIFNG_4h_R3	WT3_mIFNG_4h_R1	WT3_mIFNG_4h_R2	WT2_mIFNG_4h_R3	KO1_UT_R1	KO1_UT_R2	KO1_UT_R3	KO2_UT_R1	KO2_UT_R2	KO2_UT_R3	KO1_mIFNG_4h_R1	KO1_mIFNG_4h_R2	KO1_mIFNG_4h_R3	KO2_mIFNG_4h_R1	KO2_mIFNG_4h_R2	KO2_mIFNG_4h_R3
ENSMUST00000041987.6	199.897	0.257402	0.393199	0.654635	0.512703	0.910967	175.419	220.396	178.412	184.04	241.448	98.4222	355.714	168.84	125.578	132.174	292.623	234.298	191.698	168.161	254.432	293.637	135.698	388.669	187.897	142.762	121.894	256.617	254.592	137.184	270.419	0	167.918	218.455	242.423	157.083
MSTRG.5879.2	1009.78	0.413894	0.135924	3.04504	0.00232653	0.0269621	775.097	910.363	910.892	1217.94	1053.81	1218.34	972.498	1194.09	1080.03	1341.16	1019.35	1125.53	1457.81	1375.26	1421.9	1324.37	1800.75	1564.52	471.528	545.028	625.405	926.842	790.549	846.153	525.732	686.058	518.741	865.204	875.155	853.193
ENSMUST00000222528.1	1146.78	0.259722	0.0971503	2.6734	0.00750867	0.0718815	987.875	1082.95	1090.91	1225.35	1397.25	1397.39	1301.19	1226.06	1300.48	1296.32	1208.69	1230.87	1646.52	1647.3	1653.03	1488.68	1619.58	1389.38	721.136	770.553	687.583	1006.99	1018.98	1070.59	767.652	713.707	713.076	851.314	957.479	934.486
ENSMUST00000222115.1	14.4868	0.675892	0.334603	2.01998	0.0433853	0.268159	7.86761	10.7408	11.864	6.15638	1.98902	13.2973	21.6339	18.7882	14.3235	19.8429	26.6116	20.7995	23.1609	11.3525	7.4955	17.1557	12.7961	30.6763	16.3131	17.16	5.34448	15.7031	19.2613	6.2195	10.4821	7.16929	23.3123	13.6153	14.4419	9.03059
ENSMUST00000221293.1	20.9145	0.864269	0.230517	3.74927	0.00017735	0.00281042	20.9247	23.0964	23.695	12.3004	12.8016	13.346	13.4921	22.9942	13.1617	38.5471	52.042	39.6935	24.7162	22.6334	22.4793	35.6466	20.6628	28.4248	6.69931	11.739	14.181	25.0308	15.886	14.7178	18.2928	17.7809	9.04218	16.0634	19.4416	17.902
ENSMUST00000222002.1	263.008	0.32073	0.182521	1.75722	0.07888	0.39629	223.464	241.791	254.151	299.366	347.034	321.071	293.225	283	324.25	274.742	317.132	305.824	397.377	397.245	416.32	377.037	396.444	348.432	120.996	96.3869	121.95	236.42	240.163	227.976	107.696	114.492	112.11	216.817	247.879	229.463
MSTRG.5879.7	12.9631	-0.139944	1.47621	-0.0947992	0.924474	0.995511	0	8.34565	1.5794	0	0	0	4.29442	0	0	2.16391	6.34095	1.80982	2.79111	0	0	0	0	0	66.1082	58.585	38.8697	0	4.99957	0	57.7624	56.5842	74.3341	0	4.32393	0
ENSMUST00000222519.1	N/A	N/A	N/A	N/A	N/A	N/A	0	0	0	0	0	0	0	0	0	0	0	0	0	0	0	0	0	0	0	0	0	0	0	0	0	0	0	0	0	0

## Sheet: KO IFNG vs UT
transcript	baseMean	log2FoldChange	lfcSE	stat	pvalue	padj	WT1_UT_R1	WT1_UT_R2	WT1_UT_R3	WT2_UT_R1	WT2_UT_R2	WT2_UT_R3	WT3_UT_R1	WT3_UT_R2	WT3_UT_R3	WT1_mIFNG_4h_R1	WT1_mIFNG_4h_R2	WT1_mIFNG_4h_R3	WT2_mIFNG_4h_R1	WT2_mIFNG_4h_R2	WT2_mIFNG_4h_R3	WT3_mIFNG_4h_R1	WT3_mIFNG_4h_R2	WT2_mIFNG_4h_R3	KO1_UT_R1	KO1_UT_R2	KO1_UT_R3	KO2_UT_R1	KO2_UT_R2	KO2_UT_R3	KO1_mIFNG_4h_R1	KO1_mIFNG_4h_R2	KO1_mIFNG_4h_R3	KO2_mIFNG_4h_R1	KO2_mIFNG_4h_R2	KO2_mIFNG_4h_R3
ENSMUST00000041987.6	199.897	-0.0577806	0.481287	-0.120054	0.90444	0.999987	175.419	220.396	178.412	184.04	241.448	98.4222	355.714	168.84	125.578	132.174	292.623	234.298	191.698	168.161	254.432	293.637	135.698	388.669	187.897	142.762	121.894	256.617	254.592	137.184	270.419	0	167.918	218.455	242.423	157.083
MSTRG.5879.2	1009.78	0.0399681	0.167087	0.239205	0.810947	0.999987	775.097	910.363	910.892	1217.94	1053.81	1218.34	972.498	1194.09	1080.03	1341.16	1019.35	1125.53	1457.81	1375.26	1421.9	1324.37	1800.75	1564.52	471.528	545.028	625.405	926.842	790.549	846.153	525.732	686.058	518.741	865.204	875.155	853.193
ENSMUST00000222528.1	1146.78	-0.0955885	0.11954	-0.799638	0.423921	0.94767	987.875	1082.95	1090.91	1225.35	1397.25	1397.39	1301.19	1226.06	1300.48	1296.32	1208.69	1230.87	1646.52	1647.3	1653.03	1488.68	1619.58	1389.38	721.136	770.553	687.583	1006.99	1018.98	1070.59	767.652	713.707	713.076	851.314	957.479	934.486
ENSMUST00000222115.1	14.4868	-0.023765	0.403279	-0.0589294	0.953008	0.999987	7.86761	10.7408	11.864	6.15638	1.98902	13.2973	21.6339	18.7882	14.3235	19.8429	26.6116	20.7995	23.1609	11.3525	7.4955	17.1557	12.7961	30.6763	16.3131	17.16	5.34448	15.7031	19.2613	6.2195	10.4821	7.16929	23.3123	13.6153	14.4419	9.03059
ENSMUST00000221293.1	20.9145	0.149305	0.292292	0.510809	0.609485	0.999987	20.9247	23.0964	23.695	12.3004	12.8016	13.346	13.4921	22.9942	13.1617	38.5471	52.042	39.6935	24.7162	22.6334	22.4793	35.6466	20.6628	28.4248	6.69931	11.739	14.181	25.0308	15.886	14.7178	18.2928	17.7809	9.04218	16.0634	19.4416	17.902
ENSMUST00000222002.1	263.008	-0.0204	0.225929	-0.090294	0.928054	0.999987	223.464	241.791	254.151	299.366	347.034	321.071	293.225	283	324.25	274.742	317.132	305.824	397.377	397.245	416.32	377.037	396.444	348.432	120.996	96.3869	121.95	236.42	240.163	227.976	107.696	114.492	112.11	216.817	247.879	229.463
MSTRG.5879.7	12.9631	0.1952	1.66852	0.11699	0.906868	0.999987	0	8.34565	1.5794	0	0	0	4.29442	0	0	2.16391	6.34095	1.80982	2.79111	0	0	0	0	0	66.1082	58.585	38.8697	0	4.99957	0	57.7624	56.5842	74.3341	0	4.32393	0
ENSMUST00000222519.1	N/A	N/A	N/A	N/A	N/A	N/A	0	0	0	0	0	0	0	0	0	0	0	0	0	0	0	0	0	0	0	0	0	0	0	0	0	0	0	0	0	0

## Sheet: KO vs WT UT
transcript	baseMean	log2FoldChange	lfcSE	stat	pvalue	padj	WT1_UT_R1	WT1_UT_R2	WT1_UT_R3	WT2_UT_R1	WT2_UT_R2	WT2_UT_R3	WT3_UT_R1	WT3_UT_R2	WT3_UT_R3	WT1_mIFNG_4h_R1	WT1_mIFNG_4h_R2	WT1_mIFNG_4h_R3	WT2_mIFNG_4h_R1	WT2_mIFNG_4h_R2	WT2_mIFNG_4h_R3	WT3_mIFNG_4h_R1	WT3_mIFNG_4h_R2	WT2_mIFNG_4h_R3	KO1_UT_R1	KO1_UT_R2	KO1_UT_R3	KO2_UT_R1	KO2_UT_R2	KO2_UT_R3	KO1_mIFNG_4h_R1	KO1_mIFNG_4h_R2	KO1_mIFNG_4h_R3	KO2_mIFNG_4h_R1	KO2_mIFNG_4h_R2	KO2_mIFNG_4h_R3
ENSMUST00000041987.6	199.897	-0.0833302	0.439363	-0.189661	0.849575	0.977727	175.419	220.396	178.412	184.04	241.448	98.4222	355.714	168.84	125.578	132.174	292.623	234.298	191.698	168.161	254.432	293.637	135.698	388.669	187.897	142.762	121.894	256.617	254.592	137.184	270.419	0	167.918	218.455	242.423	157.083
MSTRG.5879.2	1009.78	-0.563474	0.152323	-3.69921	0.000216272	0.0047695	775.097	910.363	910.892	1217.94	1053.81	1218.34	972.498	1194.09	1080.03	1341.16	1019.35	1125.53	1457.81	1375.26	1421.9	1324.37	1800.75	1564.52	471.528	545.028	625.405	926.842	790.549	846.153	525.732	686.058	518.741	865.204	875.155	853.193
ENSMUST00000222528.1	1146.78	-0.474537	0.108821	-4.36072	1.29637e-05	0.000440061	987.875	1082.95	1090.91	1225.35	1397.25	1397.39	1301.19	1226.06	1300.48	1296.32	1208.69	1230.87	1646.52	1647.3	1653.03	1488.68	1619.58	1389.38	721.136	770.553	687.583	1006.99	1018.98	1070.59	767.652	713.707	713.076	851.314	957.479	934.486
ENSMUST00000222115.1	14.4868	0.163023	0.372905	0.437171	0.661987	0.936224	7.86761	10.7408	11.864	6.15638	1.98902	13.2973	21.6339	18.7882	14.3235	19.8429	26.6116	20.7995	23.1609	11.3525	7.4955	17.1557	12.7961	30.6763	16.3131	17.16	5.34448	15.7031	19.2613	6.2195	10.4821	7.16929	23.3123	13.6153	14.4419	9.03059
ENSMUST00000221293.1	20.9145	-0.247276	0.26871	-0.920235	0.35745	0.779436	20.9247	23.0964	23.695	12.3004	12.8016	13.346	13.4921	22.9942	13.1617	38.5471	52.042	39.6935	24.7162	22.6334	22.4793	35.6466	20.6628	28.4248	6.69931	11.739	14.181	25.0308	15.886	14.7178	18.2928	17.7809	9.04218	16.0634	19.4416	17.902
ENSMUST00000222002.1	263.008	-0.720889	0.205273	-3.51184	0.000445008	0.00853795	223.464	241.791	254.151	299.366	347.034	321.071	293.225	283	324.25	274.742	317.132	305.824	397.377	397.245	416.32	377.037	396.444	348.432	120.996	96.3869	121.95	236.42	240.163	227.976	107.696	114.492	112.11	216.817	247.879	229.463
MSTRG.5879.7	12.9631	4.1059	1.56818	2.61826	0.00883795	0.0846674	0	8.34565	1.5794	0	0	0	4.29442	0	0	2.16391	6.34095	1.80982	2.79111	0	0	0	0	0	66.1082	58.585	38.8697	0	4.99957	0	57.7624	56.5842	74.3341	0	4.32393	0
ENSMUST00000222519.1	N/A	N/A	N/A	N/A	N/A	N/A	0	0	0	0	0	0	0	0	0	0	0	0	0	0	0	0	0	0	0	0	0	0	0	0	0	0	0	0	0	0

## Sheet: KO vs WT IFNG
transcript	baseMean	log2FoldChange	lfcSE	stat	pvalue	padj	WT1_UT_R1	WT1_UT_R2	WT1_UT_R3	WT2_UT_R1	WT2_UT_R2	WT2_UT_R3	WT3_UT_R1	WT3_UT_R2	WT3_UT_R3	WT1_mIFNG_4h_R1	WT1_mIFNG_4h_R2	WT1_mIFNG_4h_R3	WT2_mIFNG_4h_R1	WT2_mIFNG_4h_R2	WT2_mIFNG_4h_R3	WT3_mIFNG_4h_R1	WT3_mIFNG_4h_R2	WT2_mIFNG_4h_R3	KO1_UT_R1	KO1_UT_R2	KO1_UT_R3	KO2_UT_R1	KO2_UT_R2	KO2_UT_R3	KO1_mIFNG_4h_R1	KO1_mIFNG_4h_R2	KO1_mIFNG_4h_R3	KO2_mIFNG_4h_R1	KO2_mIFNG_4h_R2	KO2_mIFNG_4h_R3
ENSMUST00000041987.6	199.897	-0.398512	0.439548	-0.906642	0.364596	0.749884	175.419	220.396	178.412	184.04	241.448	98.4222	355.714	168.84	125.578	132.174	292.623	234.298	191.698	168.161	254.432	293.637	135.698	388.669	187.897	142.762	121.894	256.617	254.592	137.184	270.419	0	167.918	218.455	242.423	157.083
MSTRG.5879.2	1009.78	-0.9374	0.152287	-6.15549	7.48473e-10	7.55163e-08	775.097	910.363	910.892	1217.94	1053.81	1218.34	972.498	1194.09	1080.03	1341.16	1019.35	1125.53	1457.81	1375.26	1421.9	1324.37	1800.75	1564.52	471.528	545.028	625.405	926.842	790.549	846.153	525.732	686.058	518.741	865.204	875.155	853.193
ENSMUST00000222528.1	1146.78	-0.829848	0.109023	-7.6117	2.70508e-14	6.52528e-12	987.875	1082.95	1090.91	1225.35	1397.25	1397.39	1301.19	1226.06	1300.48	1296.32	1208.69	1230.87	1646.52	1647.3	1653.03	1488.68	1619.58	1389.38	721.136	770.553	687.583	1006.99	1018.98	1070.59	767.652	713.707	713.076	851.314	957.479	934.486
ENSMUST00000222115.1	14.4868	-0.536634	0.368151	-1.45765	0.144938	0.47917	7.86761	10.7408	11.864	6.15638	1.98902	13.2973	21.6339	18.7882	14.3235	19.8429	26.6116	20.7995	23.1609	11.3525	7.4955	17.1557	12.7961	30.6763	16.3131	17.16	5.34448	15.7031	19.2613	6.2195	10.4821	7.16929	23.3123	13.6153	14.4419	9.03059
ENSMUST00000221293.1	20.9145	-0.96224	0.257619	-3.73513	0.00018762	0.00406376	20.9247	23.0964	23.695	12.3004	12.8016	13.346	13.4921	22.9942	13.1617	38.5471	52.042	39.6935	24.7162	22.6334	22.4793	35.6466	20.6628	28.4248	6.69931	11.739	14.181	25.0308	15.886	14.7178	18.2928	17.7809	9.04218	16.0634	19.4416	17.902
ENSMUST00000222002.1	263.008	-1.06202	0.205477	-5.16856	2.359e-07	1.33774e-05	223.464	241.791	254.151	299.366	347.034	321.071	293.225	283	324.25	274.742	317.132	305.824	397.377	397.245	416.32	377.037	396.444	348.432	120.996	96.3869	121.95	236.42	240.163	227.976	107.696	114.492	112.11	216.817	247.879	229.463
MSTRG.5879.7	12.9631	4.44104	1.5824	2.80653	0.0050078	0.0535214	0	8.34565	1.5794	0	0	0	4.29442	0	0	2.16391	6.34095	1.80982	2.79111	0	0	0	0	0	66.1082	58.585	38.8697	0	4.99957	0	57.7624	56.5842	74.3341	0	4.32393	0
ENSMUST00000222519.1	N/A	N/A	N/A	N/A	N/A	N/A	0	0	0	0	0	0	0	0	0	0	0	0	0	0	0	0	0	0	0	0	0	0	0	0	0	0	0	0	0	0

## Sheet: Interaction
transcript	baseMean	log2FoldChange	lfcSE	stat	pvalue	padj	WT1_UT_R1	WT1_UT_R2	WT1_UT_R3	WT2_UT_R1	WT2_UT_R2	WT2_UT_R3	WT3_UT_R1	WT3_UT_R2	WT3_UT_R3	WT1_mIFNG_4h_R1	WT1_mIFNG_4h_R2	WT1_mIFNG_4h_R3	WT2_mIFNG_4h_R1	WT2_mIFNG_4h_R2	WT2_mIFNG_4h_R3	WT3_mIFNG_4h_R1	WT3_mIFNG_4h_R2	WT2_mIFNG_4h_R3	KO1_UT_R1	KO1_UT_R2	KO1_UT_R3	KO2_UT_R1	KO2_UT_R2	KO2_UT_R3	KO1_mIFNG_4h_R1	KO1_mIFNG_4h_R2	KO1_mIFNG_4h_R3	KO2_mIFNG_4h_R1	KO2_mIFNG_4h_R2	KO2_mIFNG_4h_R3
ENSMUST00000041987.6	199.897	-0.315182	0.621484	-0.507145	0.612053	0.999977	175.419	220.396	178.412	184.04	241.448	98.4222	355.714	168.84	125.578	132.174	292.623	234.298	191.698	168.161	254.432	293.637	135.698	388.669	187.897	142.762	121.894	256.617	254.592	137.184	270.419	0	167.918	218.455	242.423	157.083
MSTRG.5879.2	1009.78	-0.373926	0.215392	-1.73603	0.082559	0.999977	775.097	910.363	910.892	1217.94	1053.81	1218.34	972.498	1194.09	1080.03	1341.16	1019.35	1125.53	1457.81	1375.26	1421.9	1324.37	1800.75	1564.52	471.528	545.028	625.405	926.842	790.549	846.153	525.732	686.058	518.741	865.204	875.155	853.193
ENSMUST00000222528.1	1146.78	-0.35531	0.154039	-2.30663	0.0210755	0.999977	987.875	1082.95	1090.91	1225.35	1397.25	1397.39	1301.19	1226.06	1300.48	1296.32	1208.69	1230.87	1646.52	1647.3	1653.03	1488.68	1619.58	1389.38	721.136	770.553	687.583	1006.99	1018.98	1070.59	767.652	713.707	713.076	851.314	957.479	934.486
ENSMUST00000222115.1	14.4868	-0.699657	0.524016	-1.33518	0.181817	0.999977	7.86761	10.7408	11.864	6.15638	1.98902	13.2973	21.6339	18.7882	14.3235	19.8429	26.6116	20.7995	23.1609	11.3525	7.4955	17.1557	12.7961	30.6763	16.3131	17.16	5.34448	15.7031	19.2613	6.2195	10.4821	7.16929	23.3123	13.6153	14.4419	9.03059
ENSMUST00000221293.1	20.9145	-0.714964	0.372254	-1.92064	0.0547776	0.999977	20.9247	23.0964	23.695	12.3004	12.8016	13.346	13.4921	22.9942	13.1617	38.5471	52.042	39.6935	24.7162	22.6334	22.4793	35.6466	20.6628	28.4248	6.69931	11.739	14.181	25.0308	15.886	14.7178	18.2928	17.7809	9.04218	16.0634	19.4416	17.902
ENSMUST00000222002.1	263.008	-0.34113	0.290444	-1.17451	0.240191	0.999977	223.464	241.791	254.151	299.366	347.034	321.071	293.225	283	324.25	274.742	317.132	305.824	397.377	397.245	416.32	377.037	396.444	348.432	120.996	96.3869	121.95	236.42	240.163	227.976	107.696	114.492	112.11	216.817	247.879	229.463
MSTRG.5879.7	12.9631	0.335144	2.22781	0.150437	0.88042	0.999977	0	8.34565	1.5794	0	0	0	4.29442	0	0	2.16391	6.34095	1.80982	2.79111	0	0	0	0	0	66.1082	58.585	38.8697	0	4.99957	0	57.7624	56.5842	74.3341	0	4.32393	0
ENSMUST00000222519.1	N/A	N/A	N/A	N/A	N/A	N/A	0	0	0	0	0	0	0	0	0	0	0	0	0	0	0	0	0	0	0	0	0	0	0	0	0	0	0	0	0	0
