# Supplementary figures and images for: Mouse B2 SINE elements function as IFN-inducible enhancers
Source: eLife journal article supplement (doi:10.7554/elife.82617), 2023-05-09

**A**

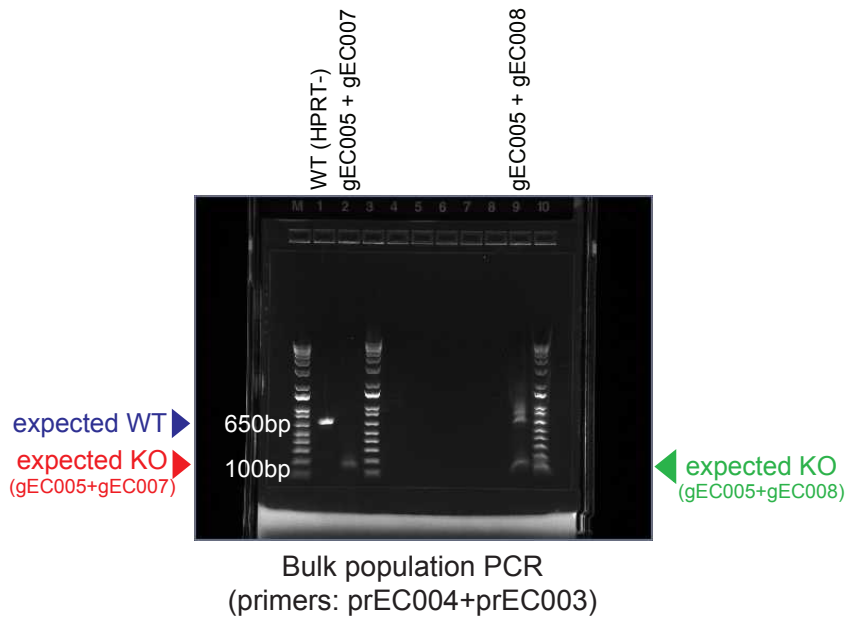

**B**

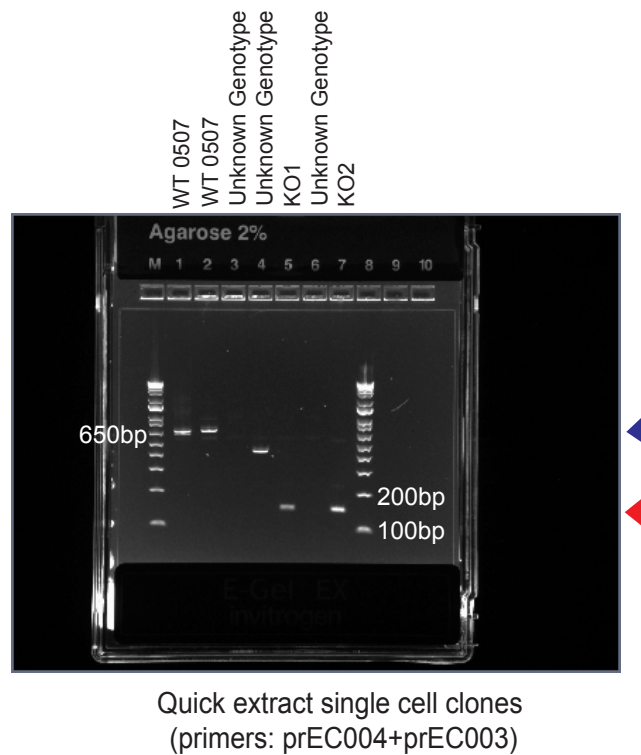

**C**

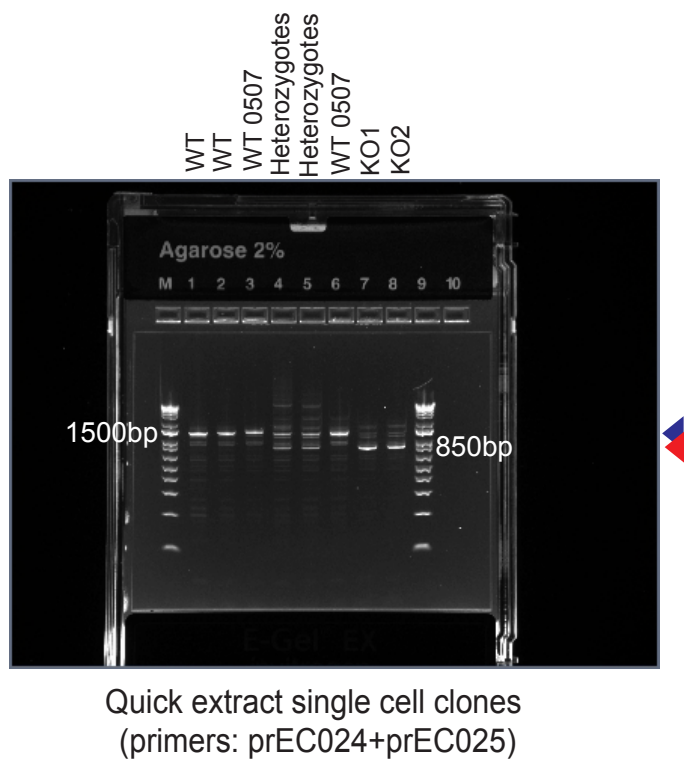

**D**

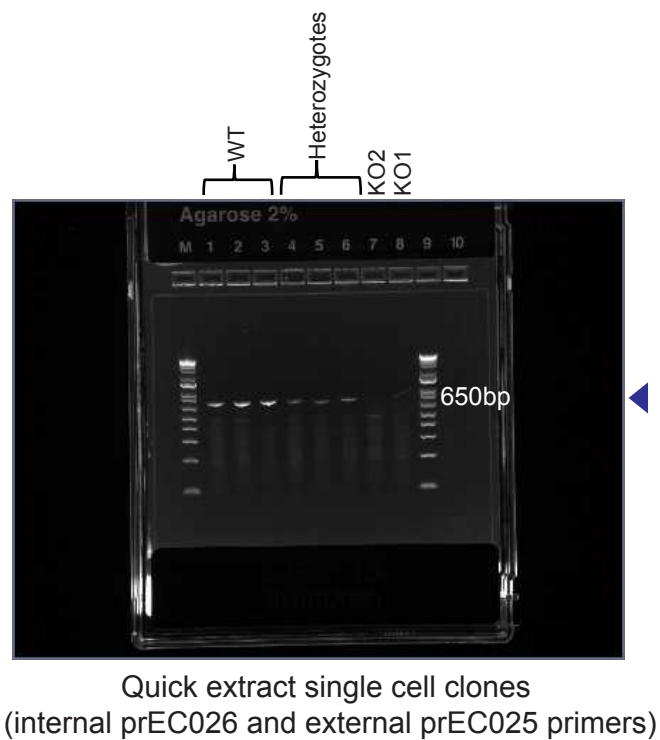

Supplement: fig3-figsupp4-data5 [file Response_Figure_6.pdf › Figure 3-figure supplement 2-source data 5/Response_Figure_6.pdf]
